# Supplementary material
Source: PubMed Central journal article supplement (PMC6467260)
Supplement: NIHMS1022138-supplement-Supportin_Information.pdf [file NIHMS1022138-supplement-Supportin_Information.pdf]

## Supporting Information

### Caspase-3 Substrates for Non-Invasive Pharmacodynamic Imaging of Apoptosis by PET/CT.

#### Authors

Brian J. Engel<sup>1</sup>, Seth T. Gammon<sup>1</sup>, Rajan Chaudhari<sup>2</sup>, Zhen Lu<sup>2</sup>, Federica Pisaneschi<sup>1</sup>, Hailing Yang<sup>2</sup>, Argentina Ornelas<sup>1</sup>, Victoria Yan<sup>1</sup>, Lindsay Kelderhouse<sup>1</sup>, Amer M. Najjar<sup>3</sup>, William P. Tong<sup>1</sup>, Shuxing Zhang<sup>2,4</sup>, David Piwnica-Worms<sup>1,5</sup>, Robert C. Bast Jr.<sup>2</sup>, Steven W. Millward<sup>1\*</sup>.

<sup>1</sup>Department of Cancer Systems Imaging, The University of Texas MD Anderson Cancer Center, 1515 Holcombe Blvd, Houston, TX 77030.

<sup>2</sup>Department of Experimental Therapeutics, The University of Texas MD Anderson Cancer Center, 1515 Holcombe Blvd, Houston, TX 77030.

<sup>3</sup>Department of Pediatrics - Research, The University of Texas MD Anderson Cancer Center, 1515 Holcombe Blvd, Houston, TX 77030.

<sup>4</sup>School of Biomedical Informatics, The University of Texas Health Science Center at Houston, Houston, TX 77030.

<sup>5</sup>Department of Cancer Biology, The University of Texas MD Anderson Cancer Center, 1515 Holcombe Blvd, Houston, TX 77030.

\*Corresponding Author

## Table of Contents

|                                                                                                 |    |
|-------------------------------------------------------------------------------------------------|----|
| Figure S1: Structure of caspase inhibitor M808. ....                                            | 3  |
| Scheme S1. Synthesis of fluorescent caspase-3 substrates.....                                   | 4  |
| Table S1: Kinetic parameters and product formation rates for 1, 2, and Ac-DEVD-AFC.....         | 5  |
| Figure S2. Confirmation of induction of apoptosis by cisplatin treatment. ....                  | 6  |
| Table S2. Physicochemical properties of caspase-3 substrates.....                               | 7  |
| Table S3: Kinetic parameters for caspase-3 hydrolysis of substrates 3 and 16. ....              | 8  |
| Scheme S2. Synthesis of cold radiotracer caspase-3 substrates. ....                             | 9  |
| Scheme S3: Synthesis of [18F]-16 ([18F]-TBD). ....                                              | 10 |
| Figure S3. RadioHPLC analysis of [F18]-16.....                                                  | 11 |
| Figure S4. RadioHPLC analysis of [F18]-17.....                                                  | 12 |
| Figure S5. RadioHPLC analysis of [F18]-18.....                                                  | 13 |
| Figure S6. Radiotracer [18F]-16 is hydrolyzed in vitro by caspase-3.....                        | 14 |
| Figure S7. <i>In vitro</i> stability of [F18]-16.....                                           | 15 |
| Figure S8. [18F]-16 accumulates in OVCAR8 cells treated with cisplatin.....                     | 16 |
| Figure S9. [18F]-16 accumulates in OVCAR5 cells treated with cisplatin and washed at 4 °C. .... | 17 |
| Figure S10. Methyl protection of aspartic acid doubles probe accumulation. ....                 | 18 |
| Figure S11. Cleaved caspase-3 staining in Jo2-treated mouse liver.....                          | 19 |
| Figure S12. Biodistribution of F18-labeled probes. ....                                         | 20 |
| Table S4. Summary of kinetic parameters from of dynamic PET modeling. ....                      | 21 |

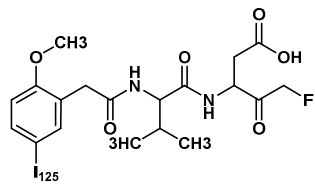

**Figure S1: Structure of caspase inhibitor M808.**

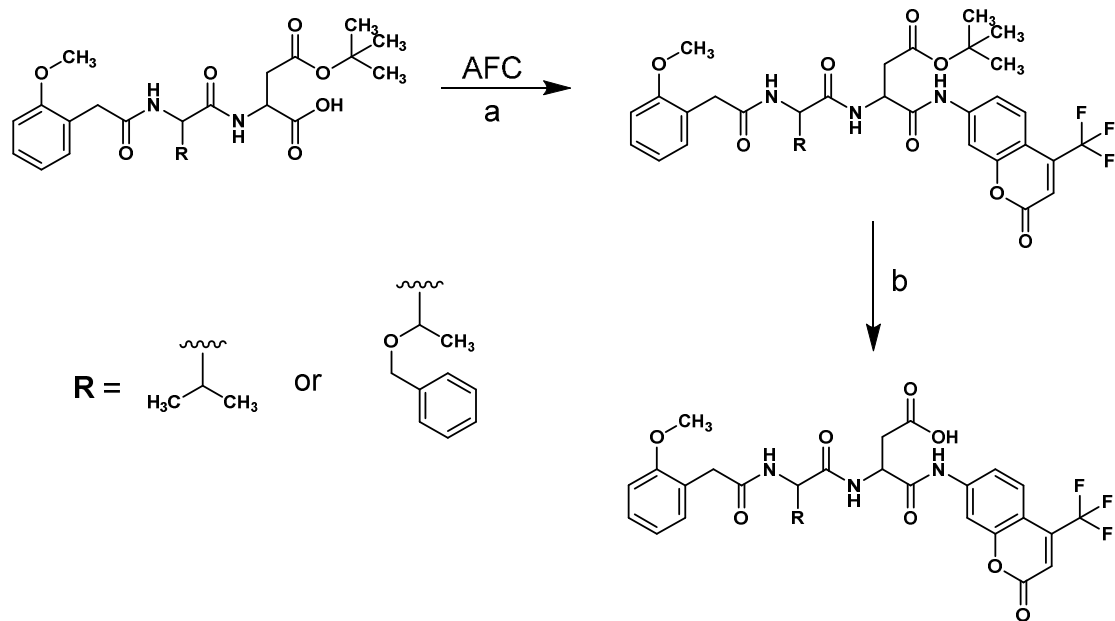

**Scheme S1. Synthesis of fluorescent caspase-3 substrates.** Reagents and conditions: (a) HATU, DIEA, DMF, 25 °C, 6 hrs; (b) 95:5 TFA:H<sub>2</sub>O, 25 °C, 1 hr. AFC - 7-amino-4-(trifluoromethyl)coumarin.

**Table S1: Kinetic parameters and product formation rates for 1, 2, and Ac-DEVD-AFC.**

| <b>Substrate</b>   | <b>Hydrolyzed Product (ng)</b> | <b>K<sub>M</sub> (μM)</b> | <b>V<sub>max</sub> (nmol/min)</b> | <b>k<sub>cat</sub> (s<sup>-1</sup>)</b>        | <b>k<sub>cat</sub>/K<sub>M</sub> (μM<sup>-1</sup>s<sup>-1</sup>)</b> |
|--------------------|--------------------------------|---------------------------|-----------------------------------|------------------------------------------------|----------------------------------------------------------------------|
| <b>1</b>           | 1.2±0.2                        | 264±61.4                  | 0.014±0.001                       | 6.3 x 10 <sup>-5</sup> ±4.5 x 10 <sup>-6</sup> | 0.24                                                                 |
| <b>2</b>           | 5.2±0.5                        | 336±60.3                  | 0.065±0.004                       | 2.9 x 10 <sup>-4</sup> ±1.7 x 10 <sup>-5</sup> | 0.87                                                                 |
| <b>Ac-DEVD-AFC</b> | 741.1±5.3                      | 4.3±0.4                   | 0.303±0.007                       | 5.9 x 10 <sup>-3</sup> ±1.4 x 10 <sup>-4</sup> | 1370                                                                 |

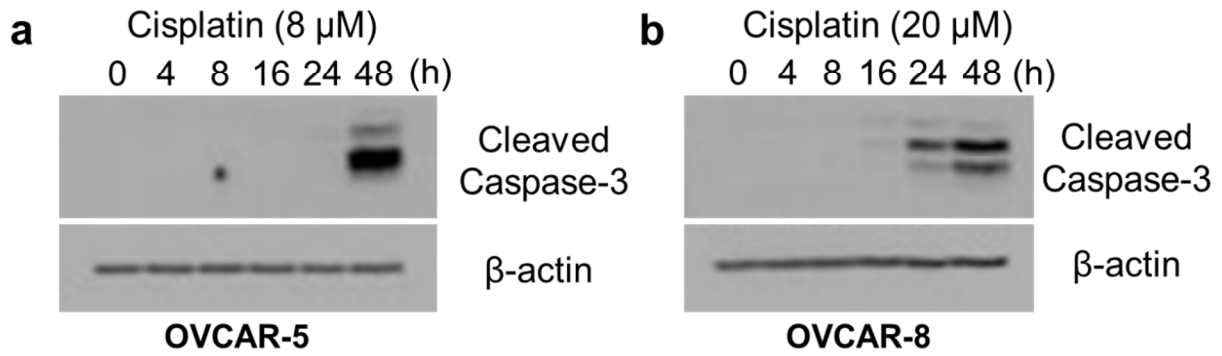

Fig S2

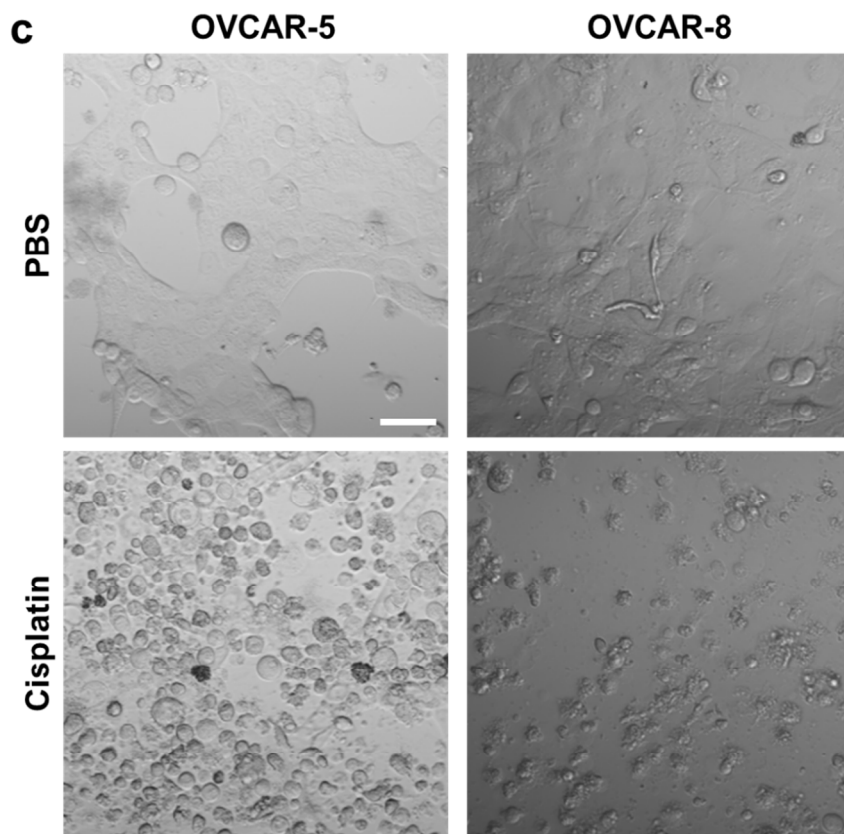

**Figure S2. Confirmation of induction of apoptosis by cisplatin treatment.** Western blot of **a**: OVCAR-5 and **b**: OVCAR-8 cells treated with 8  $\mu$ M and 20  $\mu$ M cisplatin, respectively, for 0-48 hours. **c**: Brightfield imaging of OVCAR-5 and OVCAR-8 cells treated with PBS or cisplatin for 48 hours. Cisplatin induces phenotypic apoptosis in cells. Scale bar represents 50  $\mu$ m.

**Table S2. Physicochemical properties of caspase-3 substrates.** LogP calculated with ChemBioDraw v14.

| <b>Compound</b> | <b>LogP</b> | <b>MW</b> | <b>H-Bond Donors</b> | <b>H-Bond Acceptors</b> |
|-----------------|-------------|-----------|----------------------|-------------------------|
| <b>1</b>        | 1.85        | 591.54    | 4                    | 11                      |
| <b>2</b>        | 2.52        | 683.64    | 4                    | 12                      |
| <b>3</b>        | 0.08        | 506.54    | 4                    | 12                      |
| <b>4</b>        | 0.18        | 620.56    | 4                    | 12                      |
| <b>5</b>        | 0.39        | 520.24    | 4                    | 12                      |
| <b>6</b>        | 0.61        | 534.59    | 4                    | 12                      |
| <b>7</b>        | 1.1         | 548.62    | 4                    | 12                      |
| <b>8</b>        | 1.5         | 574.65    | 4                    | 12                      |
| <b>9</b>        | 1.9         | 596.66    | 4                    | 12                      |
| <b>10</b>       | 0.13        | 603.7     | 4                    | 13                      |
| <b>11</b>       | -1.07       | 563.59    | 5                    | 14                      |
| <b>12</b>       | -0.58       | 577.61    | 5                    | 14                      |
| <b>13</b>       | 1.09        | 653.71    | 5                    | 14                      |
| <b>14</b>       | -1.43       | 593.61    | 6                    | 15                      |
| <b>15</b>       | 0.85        | 612.66    | 4                    | 13                      |
| <b>16</b>       | 0.75        | 598.63    | 4                    | 13                      |
| <b>17</b>       | 1.01        | 612.66    | 3                    | 13                      |
| <b>18</b>       | 1.53        | 554.62    | 3                    | 11                      |
| <b>19</b>       | 2.35        | 660.27    | 4                    | 13                      |
| <b>20</b>       | 2.35        | 660.27    | 4                    | 13                      |

**Table S3: Kinetic parameters for caspase-3 hydrolysis of substrates 3 and 16.**

| <b>Substrate</b> | <b><math>K_m</math> (<math>\mu\text{M}</math>)</b> | <b><math>V_{\text{max}}</math> (nmol/min)</b> | <b><math>k_{\text{cat}}</math> (<math>\text{s}^{-1}</math>)</b> | <b><math>k_{\text{cat}}/K_m</math> (<math>\mu\text{M}^{-1}\text{s}^{-1}</math>)</b> |
|------------------|----------------------------------------------------|-----------------------------------------------|-----------------------------------------------------------------|-------------------------------------------------------------------------------------|
| <b>3</b>         | 2260 $\pm$ 622                                     | 0.0012 $\pm$ 0.00015                          | $4.5 \times 10^{-6} \pm 5.1 \times 10^{-7}$                     | 0.0013                                                                              |
| <b>16</b>        | 3190 $\pm$ 1150                                    | 0.021 $\pm$ 0.004                             | $7.1 \times 10^{-5} \pm 1.3 \times 10^{-5}$                     | 0.022                                                                               |



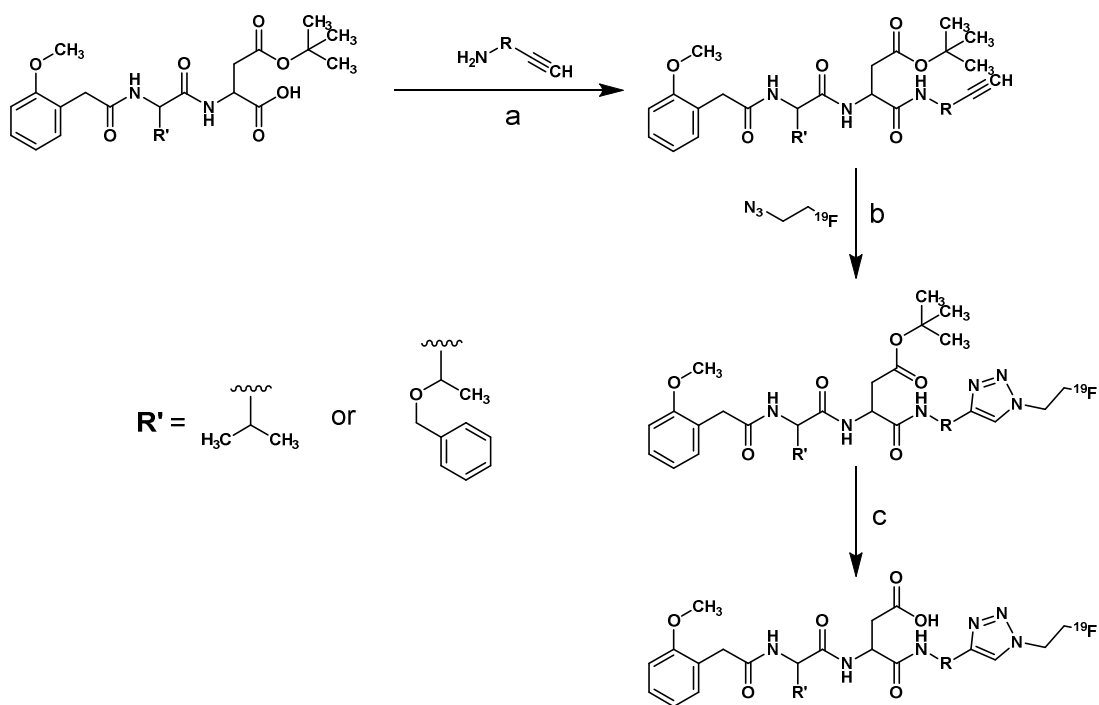

**Scheme S2. Synthesis of cold radiotracer caspase-3 substrates.** Reagents and conditions: (a) HBTU, DIEA, DMF, 25 °C, 6 hrs; (b) CuSO<sub>4</sub>, L-ascorbic acid, 1:1 DMF:H<sub>2</sub>O, 25 °C 16 hrs; (c) 95:5 TFA:H<sub>2</sub>O, 25 °C, 1 hr. AFC - 7-amino-4-(trifluoromethyl)coumarin. Refer to Table 1 for **R** sidegroups.

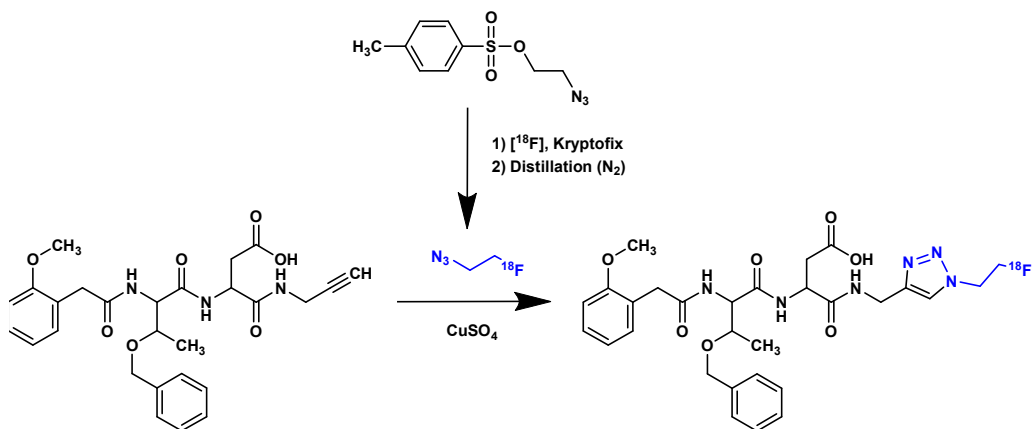

**Scheme S3: Synthesis of [<sup>18</sup>F]-16 ([<sup>18</sup>F]-TBD).** Alkyne precursor was conjugated to 2-[<sup>18</sup>F]-fluoroethylazide *via* Cu-catalyzed azide-alkyne click chemistry with a GE Tracerlab to produce the fluorine-18-labeled product.

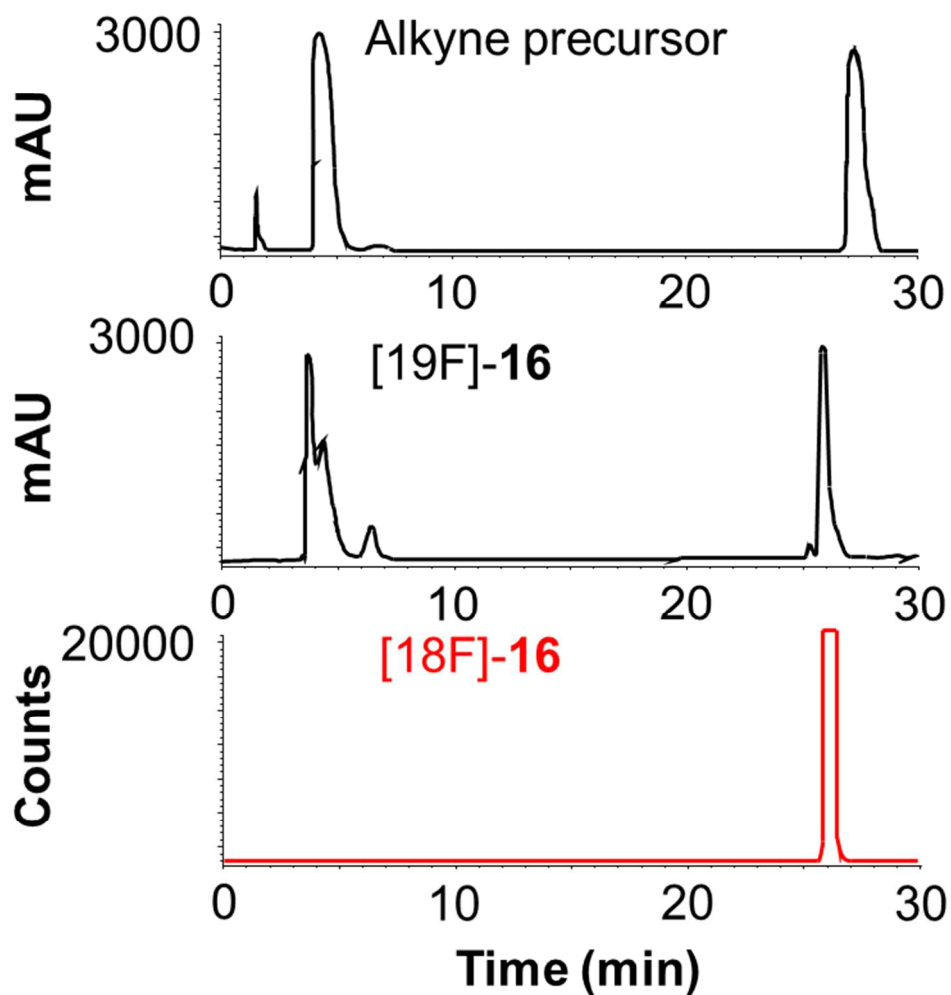

**Figure S3. RadioHPLC analysis of [F18]-16.** 20  $\mu$ L of product was analyzed by radio-HPLC on a C18 column (Econosil C18, 10  $\mu$ m, 250 mm, 4.6 mm), a water (0.1% (v/v) TFA) and CH<sub>3</sub>CN (0.1% (v/v) TFA) gradient (5% B  $\rightarrow$  60% B in 30 min) with a flow of 1 mL/min.

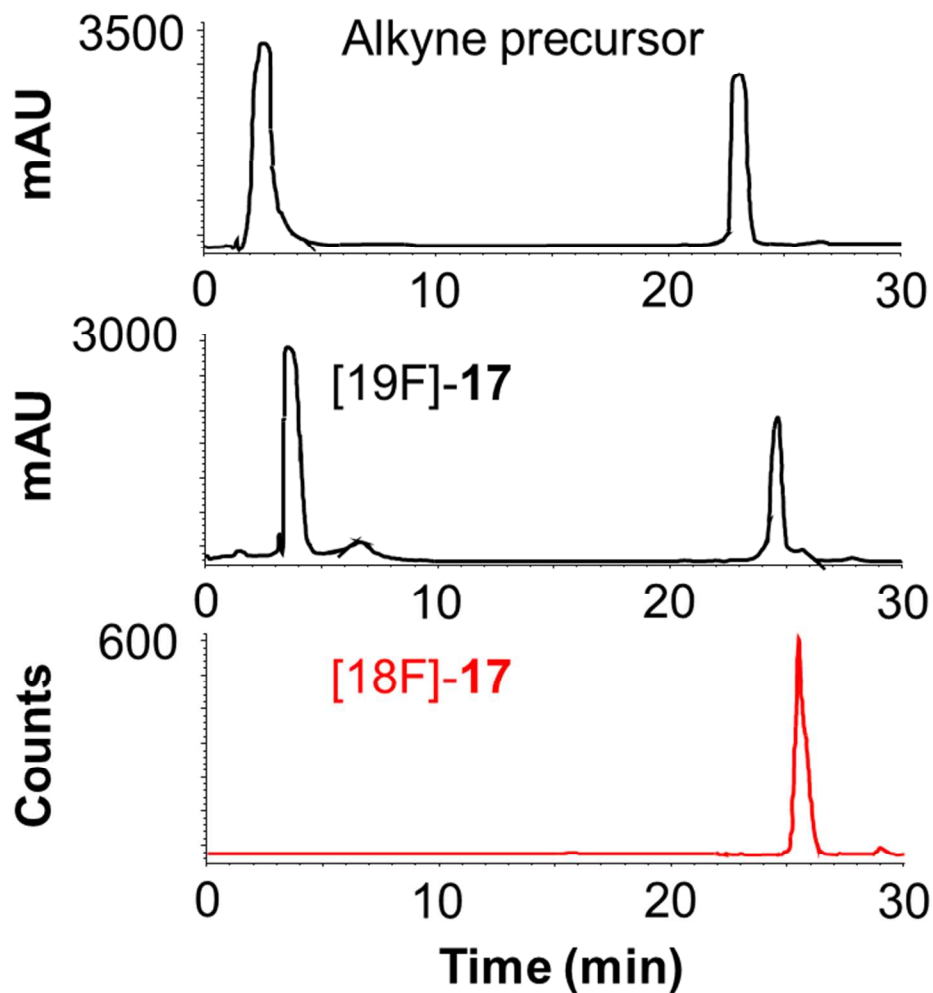

**Figure S4. RadioHPLC analysis of [F18]-17.** 20  $\mu$ L of product was analyzed by radio-HPLC on a C18 column (Econosil C18, 10  $\mu$ m, 250 mm, 4.6 mm), a water (0.1% (v/v) TFA) and CH<sub>3</sub>CN (0.1% (v/v) TFA) gradient (5% B  $\rightarrow$  60% B in 30 min) with a flow of 1 mL/min.

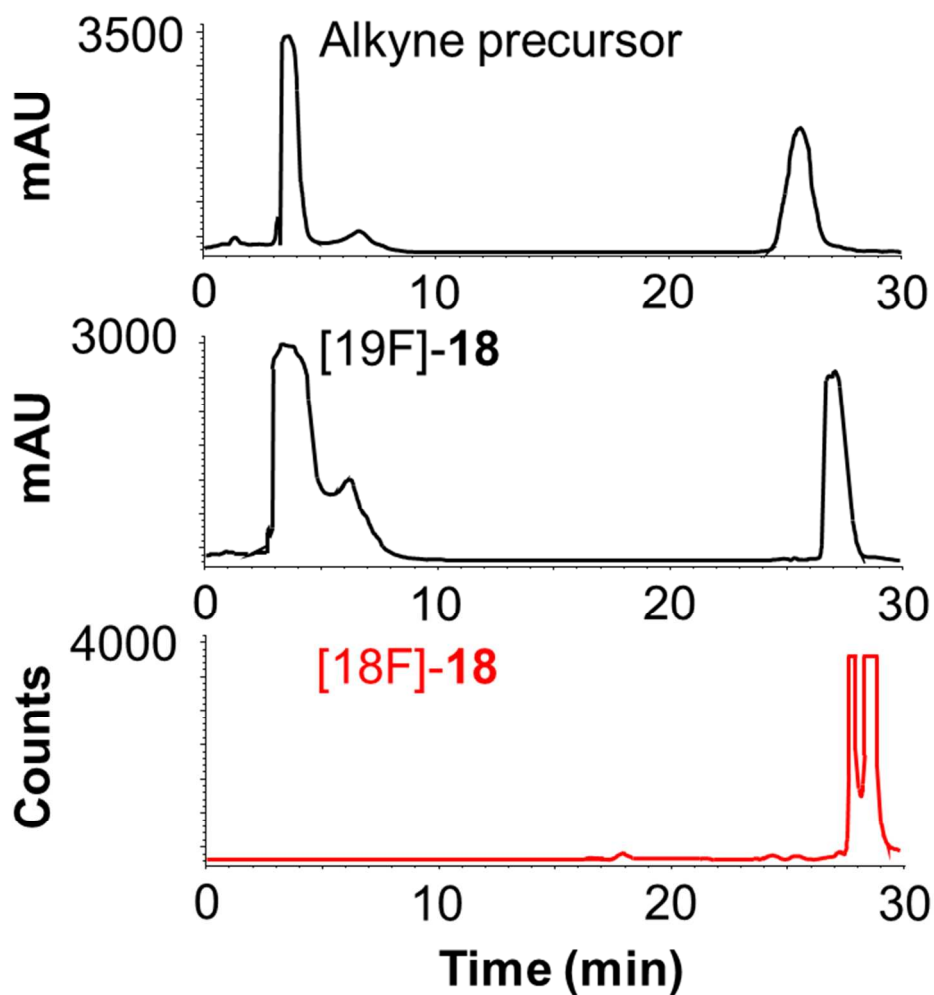

**Figure S5. RadioHPLC analysis of [F18]-18.** 20  $\mu$ L of product was analyzed by radio-HPLC on a C18 column (Econosil C18, 10  $\mu$ m, 250 mm, 4.6 mm), a water (0.1% (v/v) TFA) and CH<sub>3</sub>CN (0.1% (v/v) TFA) gradient (5% B  $\rightarrow$  60% B in 30 min) with a flow of 1 mL/min.

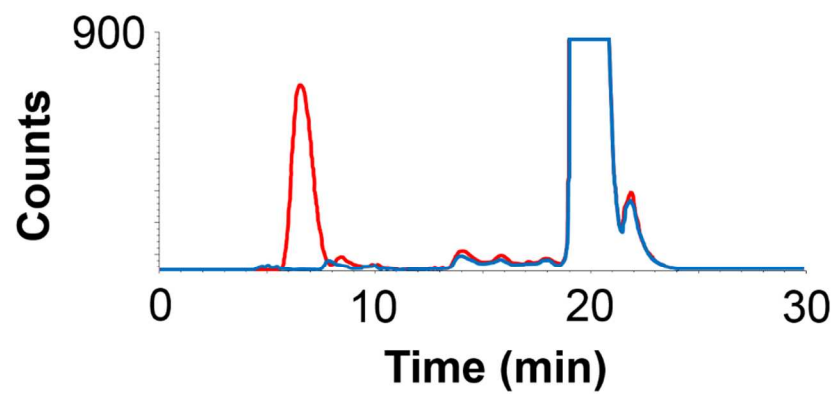

**Figure S6. Radiotracer [18F]-16 is hydrolyzed in vitro by caspase-3.** Radio HPLC trace of [18F]-16 treated with caspase-3 (red) or a no caspase-3 control (blue). Hydrolyzed tracer had a retention time of 6.5 min versus 20 min for the intact probe.

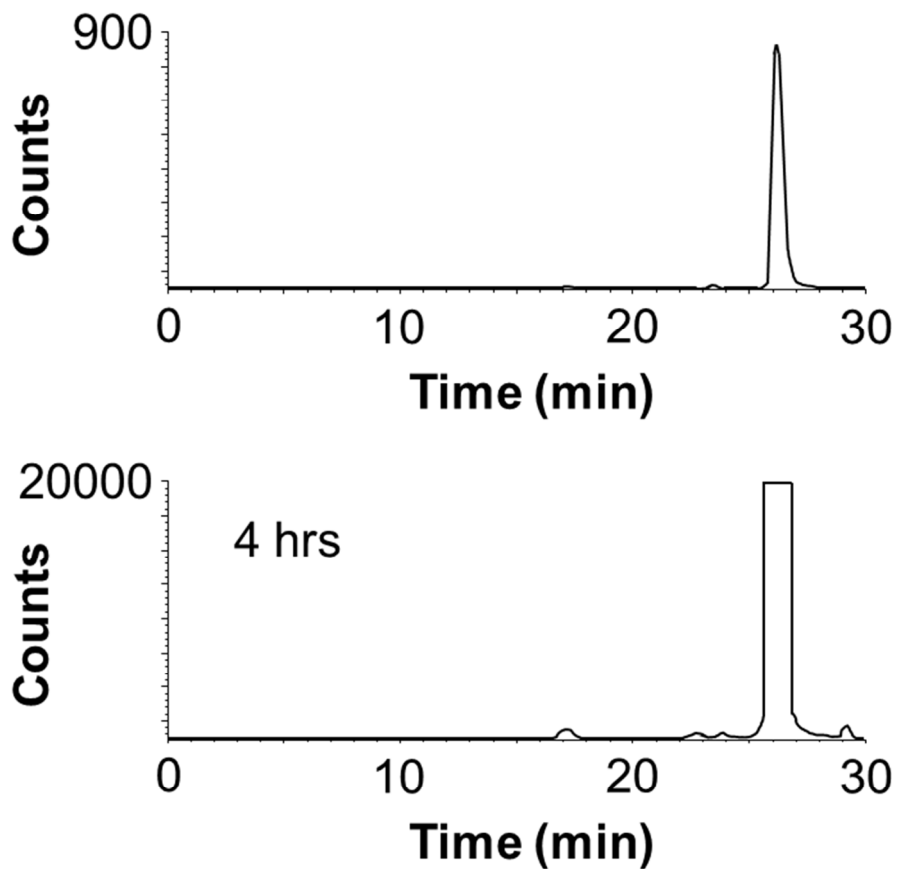

**Figure S7. *In vitro* stability of [F18]-16.** 20  $\mu$ L of product was analyzed by radio-HPLC on a C18 column (Econosil C18, 10  $\mu$ m, 250 mm, 4.6 mm), a water (0.1% (v/v) TFA) and CH<sub>3</sub>CN (0.1% (v/v) TFA) gradient (5% B  $\rightarrow$  60% B in 30 min) with a flow of 1 mL/min immediately after elution with ethanol (top) or after 4 hours incubated at room temperature (bottom). Differences in counts are from increasing the sensitivity of the gamma detector to compensate for radioactive decay.

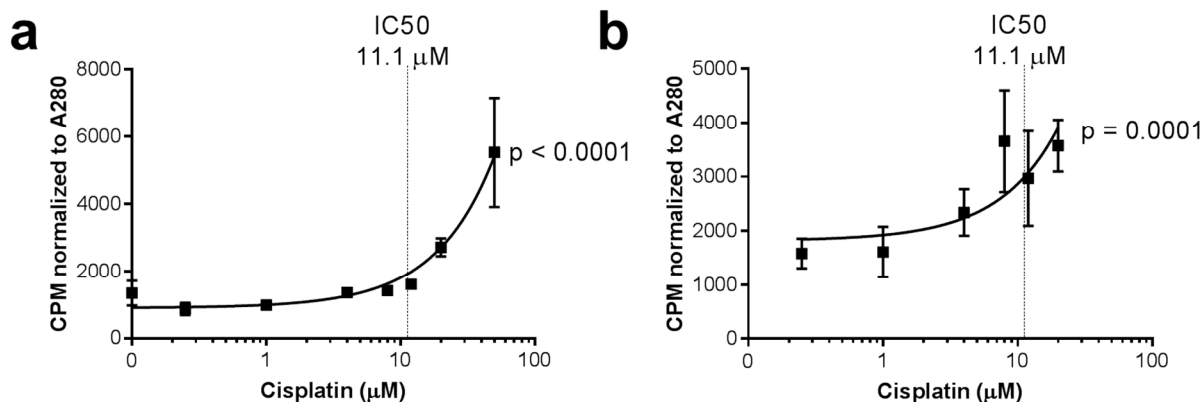

**Figure S8. [18F]-16 accumulates in OVCAR8 cells treated with cisplatin.** Accumulation of [18F]-16 in OVCAR-8 cells treated with 0-50 μM cisplatin for 48 hours, then 5 μCi of [18F]-16 for 1 hour and washed at 37 °C (a) or 4 °C (b). Reported IC50 indicated by dotted line<sup>16</sup>. Normalized gamma counts were graphed (means ± standard deviation) against cisplatin concentration and fit to a non-linear regression. Statistical F-test finds that the slope is non-zero with high certainty, n =3 for each condition.



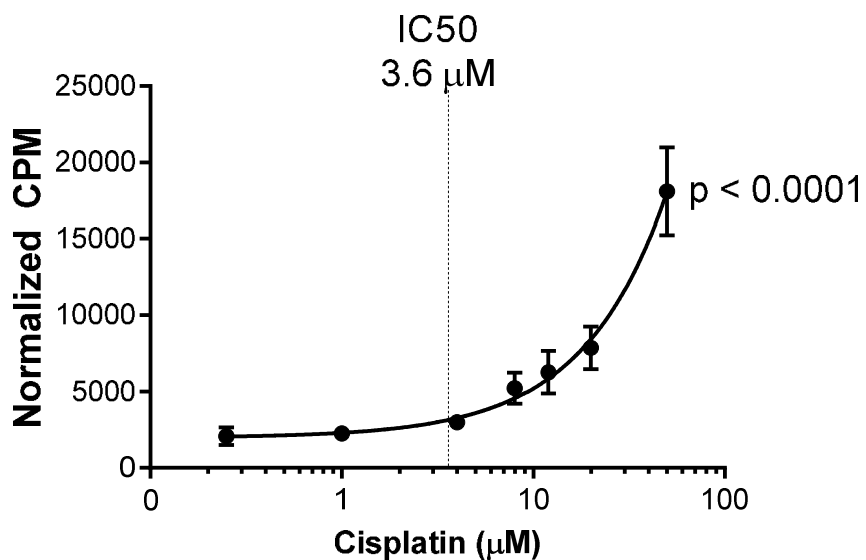

**Figure S9. [18F]-16 accumulates in OVCAR5 cells treated with cisplatin and washed at 4 °C.** Accumulation of [18F]-16 in OVCAR-5 cells treated with 0-50 μM cisplatin for 48 hours, then 5 μCi of [18F]-16 for 1 hour and washed at 4 °C. Reported IC50 indicated by dotted line<sup>16</sup>. Normalized gamma counts were graphed (means ± standard deviation) against cisplatin concentration and fit to a non-linear regression. Statistical F-test finds that the slope is non-zero with high certainty.

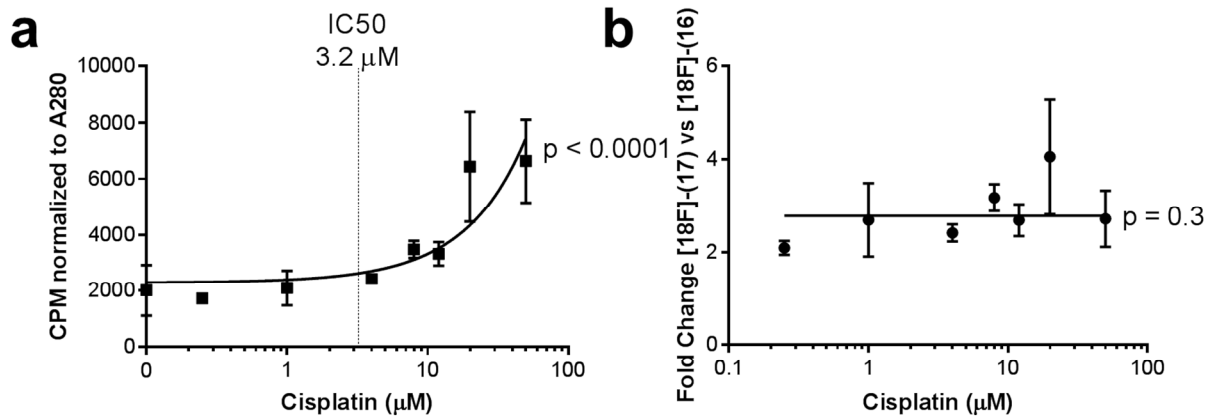

**Figure S10. Methyl protection of aspartic acid doubles probe accumulation.** **a:** OVCAR-5 cells were treated with 0-50  $\mu\text{M}$  cisplatin for 48 hours and then 5  $\mu\text{Ci}$  of  $[18\text{F}]\text{-17}$  for 1 hour. Reported  $\text{IC}_{50}$  indicated by dotted line<sup>16</sup>. Normalized gamma counts were graphed (means  $\pm$  standard deviation) against cisplatin concentration and fit to a non-linear regression. **b:** Comparison of cisplatin dependent accumulation of  $[18\text{F}]\text{-17}$  vs  $[18\text{F}]\text{-16}$  in OVCAR5 cells. Accumulation is independent of cisplatin concentration. Statistical F-test finds that the slope is non-zero with high certainty in **a** and not significant in **b**,  $n = 3$  for each condition.

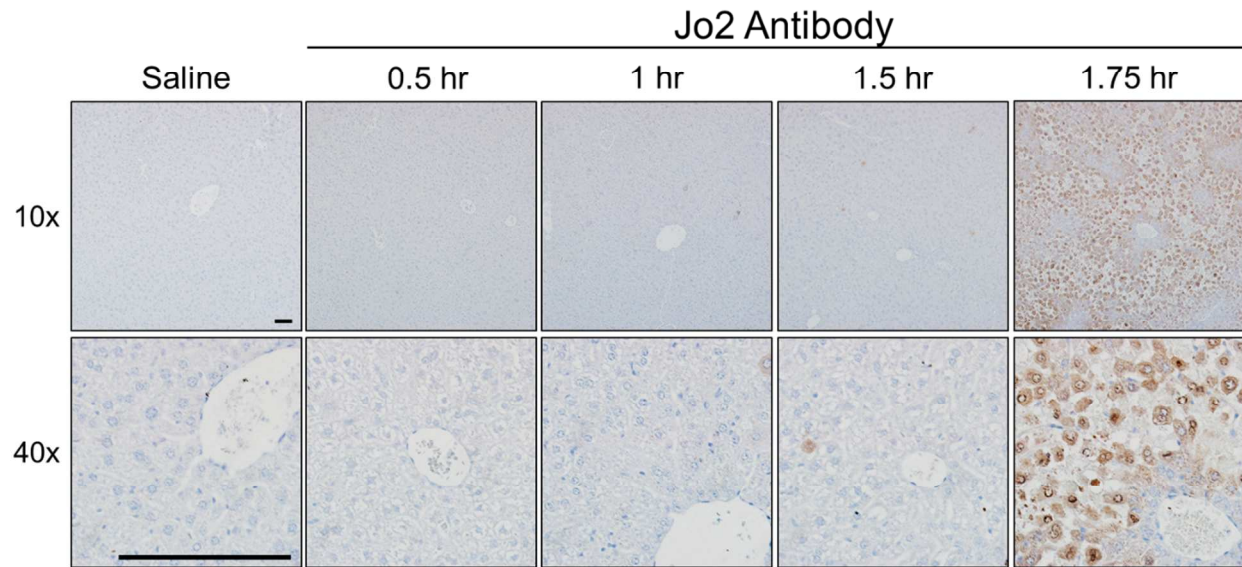

**Figure S11. Cleaved caspase-3 staining in Jo2-treated mouse liver.** Mice were treated with saline or 10  $\mu\text{g}$  Jo2 antibody *i.v.* After the times listed, animals were sacrificed and livers fixed and stained for cleaved caspase-3. Scale bar represents 200  $\mu\text{m}$ .

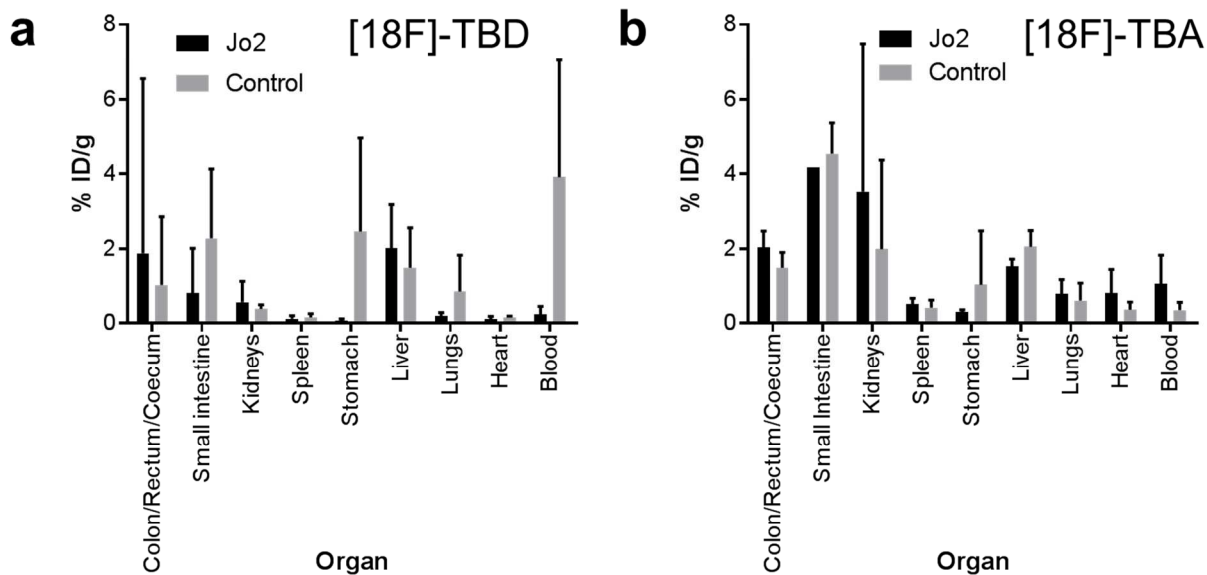

**Figure S12. Biodistribution of F18-labeled probes.** Mice were anesthetized, injected i.v. with [18F]-TBD (a) or [18F]-TBA (b) and then subjected to a 30 min dynamic PET with 5 min CT. Immediately after, mice were euthanized and organs harvested and radioactivity measured with a gamma counter. Organs were weighed and percent of injected dose per gram tissue calculated. Bars represent means  $\pm$  standard deviation. n = 7 ([18F]-TBD Jo2), n = 4 ([18F]-TBD control), n = 2 ([18F]-TBA Jo2), n = 3 ([18F]-TBA control).

**Table S4. Summary of kinetic parameters from of dynamic PET modeling.**

| Probe | Treatment | k1 (1/sec) |                |             |          | k2 (1/sec) |                |             |          | k3 (1/sec) |                |             |          |
|-------|-----------|------------|----------------|-------------|----------|------------|----------------|-------------|----------|------------|----------------|-------------|----------|
|       |           | Estimate   | Standard Error | T-Statistic | P-Value  | Estimate   | Standard Error | T-Statistic | P-Value  | Estimate   | Standard Error | T-Statistic | P-Value  |
| 16    | Control   | 1.98E-02   | 4.98E-03       | 3.97        | 3.65E-04 | 1.89E-12   | 1.31E-03       | 1.44E-09    | 1        | 1.78E-03   | 3.67E-04       | 4.84        | 2.94E-05 |
| 16    | Control   | 1.55E-02   | 2.21E-03       | 7.02        | 1.51E-09 | 5.86E-13   | 5.69E-04       | 1.03E-09    | 1        | 1.20E-03   | 1.23E-04       | 9.72        | 2.32E-14 |
| 16    | Control   | 5.14E-03   | 7.54E-04       | 6.83        | 3.30E-09 | 5.86E-13   | 9.30E-04       | 6.30E-10    | 1        | 1.46E-03   | 5.78E-04       | 2.53        | 1.37E-02 |
| 16    | Control   | 1.21E-02   | 1.68E-03       | 7.25        | 5.82E-10 | 5.86E-13   | 7.61E-04       | 7.71E-10    | 1        | 1.81E-03   | 1.98E-04       | 9.18        | 2.08E-13 |
| 16    | Jo2       | 1.69E-02   | 1.53E-03       | 11.00       | 1.34E-12 | 5.86E-13   | 2.31E-04       | 2.54E-09    | 1        | 6.30E-04   | 9.83E-05       | 6.41        | 2.93E-07 |
| 16    | Jo2       | 4.33E-02   | 5.87E-03       | 7.38        | 3.35E-10 | 3.81E-12   | 3.17E-04       | 1.20E-08    | 1        | 7.58E-04   | 1.01E-04       | 7.52        | 1.92E-10 |
| 16    | Jo2       | 4.09E-02   | 8.08E-03       | 5.06        | 3.53E-06 | 3.48E-12   | 7.37E-04       | 4.72E-09    | 1        | 1.80E-03   | 2.49E-04       | 7.26        | 5.68E-10 |
| 16    | Jo2       | 1.14E-02   | 1.41E-03       | 8.11        | 2.27E-11 | 7.70E-12   | 8.08E-04       | 7.26E-10    | 1        | 1.05E-03   | 1.08E-04       | 15.86       | 1.13E-23 |
| 16    | Jo2       | 2.60E-02   | 4.10E-03       | 6.33        | 2.42E-08 | 5.86E-13   | 4.86E-04       | 1.21E-09    | 1        | 1.03E-03   | 1.58E-04       | 6.56        | 9.67E-09 |
| 16    | Jo2       | 2.74E-02   | 4.52E-03       | 6.05        | 7.49E-08 | 5.86E-13   | 4.69E-04       | 1.25E-09    | 1        | 7.82E-04   | 2.59E-04       | 3.02        | 3.55E-03 |
| 16    | Jo2       | 4.96E-02   | 9.12E-03       | 5.44        | 8.42E-07 | 5.86E-13   | 3.37E-04       | 1.74E-09    | 1        | 7.34E-04   | 9.90E-05       | 7.41        | 2.98E-10 |
| 18    | Control   | 3.85E-02   | 8.10E-03       | 4.75        | 1.13E-05 | 5.86E-13   | 5.55E-04       | 1.06E-09    | 1        | 8.95E-04   | 2.53E-04       | 3.54        | 7.38E-04 |
| 18    | Control   | 2.09E-02   | 3.46E-03       | 6.05        | 7.49E-08 | 5.86E-13   | 4.80E-04       | 1.22E-09    | 1        | 8.34E-04   | 2.65E-04       | 3.15        | 2.45E-03 |
| 18    | Control   | 3.58E-02   | 1.00E-02       | 3.57        | 6.75E-04 | 5.86E-13   | 9.37E-04       | 6.26E-10    | 1        | 1.50E-03   | 3.61E-04       | 4.14        | 9.92E-05 |
| 18    | Jo2       | 3.22E-03   | 6.79E-04       | 4.74        | 1.19E-05 | 5.86E-13   | 1.34E-03       | 4.37E-10    | 1        | 6.48E-04   | 1.10E-03       | 0.59        | 5.57E-01 |
| 18    | Jo2       | 1.18E-02   | 2.00E-03       | 5.88        | 1.51E-07 | 5.86E-13   | 8.71E-04       | 6.73E-10    | 1        | 1.42E-03   | 4.10E-04       | 3.47        | 9.18E-04 |
| 16    | Control   | 1.42E-11   | 8.47E-04       | 1.68E-08    | 1        | 2.37E-02   | 6.90E-03       | 3.43        | 1.65E-03 | 1.22E-12   | 3.32E-04       | 3.67E-09    | 1        |
| 16    | Control   | 5.86E-13   | 3.04E-04       | 1.93E-09    | 1        | 1.30E-02   | 2.32E-03       | 5.60        | 4.51E-07 | 5.86E-13   | 1.51E-04       | 3.87E-09    | 1        |
| 16    | Control   | 1.46E-03   | 4.41E-04       | 3.30        | 1.54E-03 | 1.18E-02   | 1.68E-03       | 7.04        | 1.36E-09 | 5.86E-13   | 2.84E-04       | 2.07E-09    | 1        |
| 16    | Control   | 5.86E-13   | 3.60E-04       | 1.63E-09    | 1        | 1.03E-02   | 1.78E-03       | 5.78        | 2.23E-07 | 5.86E-13   | 1.53E-04       | 3.83E-09    | 1        |
| 16    | Jo2       | 1.20E-03   | 2.06E-04       | 5.85        | 1.49E-06 | 2.85E-02   | 2.63E-03       | 10.83       | 2.01E-12 | 7.43E-04   | 2.40E-04       | 3.09        | 4.06E-03 |
| 16    | Jo2       | 2.04E-03   | 6.66E-04       | 3.07        | 3.14E-03 | 6.86E-02   | 9.31E-03       | 7.37        | 3.52E-10 | 5.45E-04   | 2.14E-04       | 2.55        | 1.31E-02 |
| 16    | Jo2       | 1.79E-04   | 1.48E-03       | 0.12        | 0.90     | 7.44E-02   | 1.45E-02       | 5.15        | 2.57E-06 | 7.75E-05   | 2.07E-04       | 0.37        | 0.71     |
| 16    | Jo2       | 5.86E-13   | 2.10E-04       | 2.79E-09    | 1        | 1.52E-03   | 6.94E-04       | 2.19        | 3.19E-02 | 1.59E-04   | 7.59E-05       | 7.72E-09    | 1        |
| 16    | Jo2       | 5.86E-13   | 7.25E-04       | 8.09E-10    | 1        | 3.47E-02   | 5.71E-03       | 6.08        | 6.68E-08 | 5.86E-13   | 1.99E-04       | 2.95E-09    | 1        |
| 16    | Jo2       | 5.13E-03   | 1.28E-03       | 4.02        | 1.53E-04 | 3.64E-02   | 6.44E-03       | 5.65        | 3.73E-07 | 5.86E-13   | 2.55E-04       | 2.30E-09    | 1        |
| 16    | Jo2       | 6.10E-04   | 8.84E-04       | 0.69        | 0.49     | 7.96E-02   | 1.49E-02       | 5.36        | 1.15E-06 | 5.86E-13   | 1.74E-04       | 3.36E-09    | 1        |
| 18    | Control   | 3.83E-03   | 1.69E-03       | 2.27        | 2.66E-02 | 9.91E-02   | 2.01E-02       | 4.93        | 5.85E-06 | 3.21E-12   | 2.88E-04       | 1.11E-08    | 1        |
| 18    | Control   | 2.90E-03   | 9.70E-04       | 2.99        | 3.90E-03 | 4.60E-02   | 7.52E-03       | 6.12        | 5.81E-08 | 5.86E-13   | 2.78E-04       | 2.11E-09    | 1        |
| 18    | Control   | 2.99E-03   | 2.01E-03       | 1.49        | 0.14     | 1.40E-01   | 3.46E-02       | 4.04        | 1.44E-04 | 5.86E-13   | 2.99E-04       | 1.96E-09    | 1        |
| 18    | Jo2       | 2.16E-03   | 4.48E-04       | 4.83        | 8.51E-06 | 2.13E-02   | 2.76E-03       | 7.73        | 7.90E-11 | 5.86E-13   | 6.85E-04       | 8.56E-10    | 1        |
| 18    | Jo2       | 2.09E-03   | 7.27E-04       | 2.88        | 5.42E-03 | 2.90E-02   | 4.08E-03       | 7.10        | 1.06E-09 | 5.86E-13   | 2.69E-04       | 2.18E-09    | 1        |
