# Supplementary material
Source: PubMed Central journal article supplement (PMC6467260)
Supplement: NIHMS1022138-supplement-Supporting_Information_-_MatLab_File.pdf [file NIHMS1022138-supplement-Supporting_Information_-_MatLab_File.pdf]

(\* build function to read data, it returns a matrix with two key parts. The first part is a matrix of three curves to plot the data using listplot, the second part is the data formatted so that the data can be fit by the fitting algorithm \*)

```
readTac[filename_] :=
```

```
Module[{x,y},
```

```
dataset=Import[filename,"CSV"];
```

```
blooddata=Table[{dataset[[i]][[1]],dataset[[i]][[2]]},{i,1,Dimensions[dataset][[1]]};
```

```
liverdata=Table[{dataset[[i]][[1]],dataset[[i]][[3]]},{i,1,Dimensions[dataset][[1]]};
```

```
gidata=Table[{dataset[[i]][[1]],dataset[[i]][[4]]},{i,1,Dimensions[dataset][[1]]};
```

```
x=dataforfit={blooddata,liverdata,gidata};
```

```
y=Flatten[Table[{i,dataforfit[[i]][[t]][[1]],dataforfit[[i]][[t]][[2]]},{i,1,3},{t,1,Dimensions[dataset][[1]]},1];
```

```
Return[{x,y}];
```

```
]
```

```
totaltime = 1700;
```

(\* blood volume estimate from weight by <https://www.ncbi.nlm.nih.gov/pmc/articles/PMC1331297/>; the below model conserves mass by normalizing the volumes of the exchanging compartments; Bl[t] represents the CONCENTRATION of tracer in the blood Li liver G Gi thus the "k" represent a descriptive rate constant for the change in transport between one compartment and another with k5 representing global excretion\*)

```
mouseModel[livervolume_,Givolume_,kBqinjected_,mouseweight_] :=
```

```
Module[{y},
```

```
bloodvolume=(mouseweight/1000*96.3);
```

```
y=ParametricNDSolveValue[{Bl'[t]==-k1*Bl[t]+k2*Li[t]*livervolume/bloodvolume-  
k4*Bl[t]-  
k5*Bl[t]+k6*G[t]*Givolume/bloodvolume,Li'[t]==k1*Bl[t]*bloodvolume/livervolum  
e-k2*Li[t]-
```

```
k3*Li[t],G'[t]==k3*Li[t]*livervolume/Givolume+k4*Bl[t]*bloodvolume/Givolume-
k6*G[t],Bl[0]==kBqinjected/bloodvolume,Li[0]==0,G[0]==0},{Bl,Li,G},{t,0,totaltime},
{k1,k2,k3,k4,k5,k6}};
```

```
Return[y];
```

```
]
```

```
mouseModel2[livervolume_,Givolume_,kBqinjected_,mouseweight_]:=
```

```
Module[{y},
```

```
bloodvolume=(mouseweight/1000*96.3);
```

```
y=ParametricNDSolveValue[{Bl'[t]==-k1*Bl[t]-k4*Bl[t]-
k5*Bl[t],Li'[t]==k1*Bl[t]*bloodvolume/livervolume-
k3*Li[t],G'[t]==k3*Li[t]*livervolume/Givolume+k4*Bl[t]*bloodvolume/Givolume,Bl
[0]==kBqinjected/bloodvolume,Li[0]==0,G[0]==0},{Bl,Li,G},{t,0,totaltime},{k1,k3,k4,
k5}}];
```

```
Return[y];
```

```
]
```

(\*data format will be time, blood concentration, liver concentration, GI concentration, in order to fit the low continual amnt in blood a kreturn is needed from GI just like from the liver if fitted separately it looks better it can also be fixed at the liver return rate as well and it looks good \*)

```
dataset=
```

```
{{30,260.829406,177.898123,128.889238},{70,78.790912,394.08627,255.472349},
{90,57.919418,432.542377,277.571582},{110,49.641256,456.040953,301.610403},
{130,45.226464,467.274313,332.35228},{150,41.34165,473.583266,375.879715},{
170,38.293797,476.059768,413.056836},{210,39.243422,476.239037,472.356497}
,{270,38.081103,468.65291,525.516445},{450,38.31765,431.878995,694.361139},
{750,38.215218,360.561313,904.494491},{1050,37.337411,308.513019,983.63780
8},{1500,35.895027,246.957162,1043.905439}};
```

```
Lv=2.583;
```

```
Gv=0.475;
```

```
model= ParametricNDSolveValue[{Bl'[t]==-k1*Bl[t]+k2*Li[t]-k4*Bl[t]-
k5*Bl[t]+k2*G[t],Li'[t]==k1*Bl[t]-k2*Li[t]-k3*Li[t],G'[t]==k3*Li[t]*Lv/Gv+k4*Bl[t]-
k2*G[t],Bl[0]==1550,Li[0]==0,G[0]==0},{Bl,Li,G},{t,0,totalltime},{k1,k2,k3,k4,k5,k6}]
```

```
ParametricFunction[!\(\(\*
```

```
GraphicsBox[RasterBox[{{179, 179, 179, 179, 179, 179, 179, 179, 179, 179, 179,
179}, {179, 180, 180, 180, 179, 179, 179, 179, 179, 179, 179}, {179, 179, 180,
179, 179, 248, 248, 178, 179, 179, 179, 179}, {179, 179, 180, 179, 179, 253, 248,
179, 179, 179, 179, 179}, {179, 179, 179, 179, 179, 248, 248, 179, 179, 179, 179,
179}, {179, 179, 248, 248, 248, 248, 248, 248, 248, 179, 179}, {179, 179, 248,
248, 248, 248, 248, 248, 179, 179}, {179, 179, 179, 179, 179, 248, 248,
179, 179, 179, 179, 179}, {179, 180, 179, 179, 179, 252, 248, 179, 178, 179, 180,
179}, {179, 180, 180, 179, 179, 248, 248, 179, 180, 180, 180, 179}, {179, 179, 179,
179, 179, 179, 179, 179, 179}, {179, 179, 179, 179, 179, 179, 179, 179, 179,
179, 179, 179, 179}}, {{0, 0}, {12, 12}}, {0, 255},
```

```
ColorFunction->GrayLevel],
```

```
BaselinePosition->Bottom,
```

```
ImageSize->{12, 12},
```

```
PlotRange->{{0, 12}, {0, 12}})\) \(\(\*
```

```
GraphicsBox[{{}, {}],
```

```
{GrayLevel[0.55], AbsoluteThickness[1.5], Opacity[1.],
LineBox[{{9.0909090909090909*^-8, 9.090909090884856*^-8},
{0.0874367476365131, 0.08197166587636243}, {0.18222810297558026`,
0.1358255024317191}, {0.27073779576926765`, 0.13315455086535802`},
{0.3575112797365835, 0.08143316377978886}, {0.4516394623155443, -
0.007347854733426912}, {0.5394859823491253, -0.08816932746972758},
{0.6346872009943513, -0.13787329990112937`}, {0.7281522108132057, -
0.12816574147938434`}, {0.8153355580866803, -0.07001063326902106},
{0.9098736039718, 0.02121659675083076}, {0.9999999090909091,
0.10024804094746914`}}}],
```

```
{GrayLevel[0.55], AbsoluteThickness[1.5], Opacity[1.],
LineBox[{{9.0909090909090909*^-8, 9.090909090880112*^-8},
{0.0874367476365131, 0.08090369567458766}, {0.18222810297558026`,
0.12746559200130417}, {0.27073779576926765`, 0.1116266937044405},
{0.3575112797365835, 0.046963725126600256`}, {0.4516394623155443, -
0.04509050859182233}, {0.5394859823491253, -0.11115559892361665`},
{0.6346872009943513, -0.12642564594664163`}, {0.7281522108132057, -
0.07740196037964171}, {0.8153355580866803, 0.004179083230780074},
```

{0.9098736039718, 0.08937493944143977}, {0.9999999090909091, 0.12834702174618903`}}},

{GrayLevel[0.55], AbsoluteThickness[1.5], Opacity[1.],  
LineBox[{{9.09090909090909\*^-8, 9.090909090875369\*^-8},  
{0.0874367476365131, 0.07984396759533968}, {0.18222810297558026`,  
0.11939549826670079`}, {0.27073779576926765`, 0.09184904274707059},  
{0.3575112797365835, 0.017913117173780694`}, {0.4516394623155443, -  
0.07109962300031061}, {0.5394859823491253, -0.11717052830989395`},  
{0.6346872009943513, -0.09879571259704382}, {0.7281522108132057, -  
0.022693471356141894`}, {0.8153355580866803, 0.06128703302641453},  
{0.9098736039718, 0.11605625481609519`}, {0.9999999090909091,  
0.10415981267620744`}}}],

{GrayLevel[0.55], AbsoluteThickness[1.5], Opacity[1.],  
LineBox[{{9.09090909090909\*^-8, 9.090909090870287\*^-8},  
{0.0874367476365131, 0.07879243663407876}, {0.18222810297558026`,  
0.1116081822210312}, {0.27073779576926765`, 0.07372482040530459},  
{0.3575112797365835, -0.006267252216927747}, {0.4516394623155443, -  
0.08743897872291118}, {0.5394859823491253, -0.11109134853087661`},  
{0.6346872009943513, -0.06371549528296311}, {0.7281522108132057,  
0.02544576624054603}, {0.8153355580866803, 0.09464282937855747},  
{0.9098736039718, 0.10731931496853601`}, {0.9999999090909091,  
0.0516787429232188}}}],

{GrayLevel[0.55], AbsoluteThickness[1.5], Opacity[1.],  
LineBox[{{9.09090909090909\*^-8, 9.090909090865543\*^-8},  
{0.0874367476365131, 0.07774905743802465}, {0.18222810297558026`,  
0.10409673959866513`}, {0.27073779576926765`, 0.05716133039337165},  
{0.3575112797365835, -0.026084496726167965`}, {0.4516394623155443, -  
0.09591154799603378}, {0.5394859823491253, -0.09685594593277226},  
{0.6346872009943513, -0.02730376120671303}, {0.7281522108132057,  
0.061646715198529656`}, {0.8153355580866803, 0.1046634148537508},  
{0.9098736039718, 0.07509702498429204}, {0.9999999090909091, -  
0.006536873471333553}}}],

{GrayLevel[0.55], AbsoluteThickness[1.5], Opacity[1.],  
LineBox[{{9.09090909090909\*^-8, 9.0909090908608\*^-8},  
{0.0874367476365131, 0.07671378556951527}, {0.18222810297558026`,  
0.09685439581479163}, {0.27073779576926765`, 0.042069810325321415`},  
{0.3575112797365835, -0.042006785469922474`}, {0.4516394623155443, -  
0.09808544986431629}, {0.5394859823491253, -0.07760167026270944},  
{0.6346872009943513, 0.0063643674428021085`}, {0.7281522108132057,  
0.08405712128907425}, {0.8153355580866803, 0.09555213349985489},  
{0.9098736039718, 0.03202960165577907}, {0.9999999090909091, -  
0.054402034659985464`}}}],

AspectRatio->1,  
Axes->{False, False},  
AxesLabel->{None, None},  
AxesOrigin->{0, 0},  
Background->GrayLevel[0.93],  
BaseStyle->{FontFamily -> "Arial"},  
DisplayFunction->Identity,  
Frame->{{True, True}, {True, True}},  
FrameLabel->{{None, None}, {None, None}},  
FrameStyle->Directive[Thickness[Tiny], GrayLevel[0.7]],  
FrameTicks->{{None, None}, {None, None}},  
GridLines->{None, None},  
GridLinesStyle->Directive[GrayLevel[0.5, 0.4]],  
ImageSize->{Automatic, 28.4375},  
LabelStyle->{FontFamily -> "Arial"},  
Method->{"ScalingFunctions" -> None},  
PlotRange->{All, All},  
PlotRangeClipping->True,  
PlotRangePadding->{Automatic, Automatic},  
Ticks->{Automatic, Automatic}] \) Expression: {Bl,Li,G}  
Parameters: {k1,k2,k3,k4,k5}

]

```
z=readTac["testdata.csv"];
```

```
Import::nffil: File not found during Import. >>
```

```
Part::partw: Part 1 of {} does not exist. >>
```

```
Table::iterb: Iterator {i,1,{}[[1]]} does not have appropriate bounds. >>
```

```
Table::iterb: Iterator {i,1,{}[[1]]} does not have appropriate bounds. >>
```

```
Part::partw: Part 1 of {} does not exist. >>
```

```
Table::iterb: Iterator {i,1,{}[[1]]} does not have appropriate bounds. >>
```

```
General::stop: Further output of Table::iterb will be suppressed during this calculation. >>
```

```
Part::partw: Part 1 of {} does not exist. >>
```

```
General::stop: Further output of Part::partw will be suppressed during this calculation. >>
```

```
dataset[[1]]
```

```
{30,260.829,177.898,128.889}
```

```
Dimensions[dataset][[1]]
```

```
13
```

```
blooddata=Table[{dataset[[i]][[1]],dataset[[i]][[2]],{i,1,Dimensions[dataset][[1]]}}];
```

```
liverdata=Table[{dataset[[i]][[1]],dataset[[i]][[3]],{i,1,Dimensions[dataset][[1]]}}];
```

```
gidata=Table[{dataset[[i]][[1]],dataset[[i]][[4]],{i,1,Dimensions[dataset][[1]]}}];
```

```
(* https://mathematica.stackexchange.com/questions/84063/ode-fitting-to-dataset *)
```

```

dataforfit={blooddata,liverdata,gidata};

newdataforfit=Flatten[Table[{i,dataforfit[[i]][[t]][[1]],dataforfit[[i]][[t]][[2]]},{i,1,3},
{t,1,Dimensions[dataset][[1]]}],1];

ListPlot[dataforfit,PlotLegends->{"blood","liver","Gi"}]

\!\(\*

GraphicsBox[{{}, {}},

{RGBColor[0.368417, 0.506779, 0.709798], PointSize[0.019444444444444445`],
AbsoluteThickness[1.6], PointBox[{{30., 260.829406}, {70., 78.790912}, {90.,
57.919418}, {110., 49.641256}, {130., 45.226464}, {150., 41.34165}, {170.,
38.293797}, {210., 39.243422}, {270., 38.081103}, {450., 38.31765}, {750.,
38.215218}, {1050., 37.337411}, {1500., 35.895027}}]},

{RGBColor[0.880722, 0.611041, 0.142051], PointSize[0.019444444444444445`],
AbsoluteThickness[1.6], PointBox[{{30., 177.898123}, {70., 394.08627}, {90.,
432.542377}, {110., 456.040953}, {130., 467.274313}, {150., 473.583266}, {170.,
476.059768}, {210., 476.239037}, {270., 468.65291}, {450., 431.878995}, {750.,
360.561313}, {1050., 308.513019}, {1500., 246.957162}}]},

{RGBColor[0.560181, 0.691569, 0.194885], PointSize[0.019444444444444445`],
AbsoluteThickness[1.6], PointBox[{{30., 128.889238}, {70., 255.472349}, {90.,
277.571582}, {110., 301.610403}, {130., 332.35228}, {150., 375.879715}, {170.,
413.056836}, {210., 472.356497}, {270., 525.516445}, {450., 694.361139}, {750.,
904.494491}, {1050., 983.637808}, {1500., 1043.905439}}]}, {}, {}},

AspectRatio->0.6180339887498948,

Axes->{True, True},

AxesLabel->{None, None},

AxesOrigin->{0, 0},

DisplayFunction->Identity,

Frame->{{False, False}, {False, False}},

FrameLabel->{{None, None}, {None, None}},

FrameTicks->{{Automatic, Automatic}, {Automatic, Automatic}},

GridLines->{None, None},

```

```

GridLineStyle->Directive[GrayLevel[0.5, 0.4]],

Method->{},

PlotRange->{{0, 1500.}, {0, 1043.905439}},

PlotRangeClipping->True,

PlotRangePadding->{{Scaled[0.02], Scaled[0.02]}, {Scaled[0.02], Scaled[0.05]}},

Ticks->{Automatic, Automatic}\) \!\(\*

GraphicsBox[{{},

{RGBColor[0.368417, 0.506779, 0.709798], PointSize[0.7], AbsoluteThickness[1.6],
EdgeForm[{{GrayLevel[0], Opacity[0.3]}]},

{RGBColor[0.368417, 0.506779, 0.709798], PointSize[0.7], AbsoluteThickness[1.6],
EdgeForm[{{GrayLevel[0], Opacity[0.3]}]}, PointBox[NCache[{{Scaled[{{Rational[1, 2],
Rational[1, 2]}]}, {Scaled[{{0.5, 0.5}}]}]}]}]},

AspectRatio->Full,

BaselinePosition->(Scaled[0.1] -> Baseline),

ImagePadding->Automatic,

ImageSize->{10, 10},

PlotRangePadding->None\)      blood

\!\(\*

GraphicsBox[{{},

{RGBColor[0.880722, 0.611041, 0.142051], PointSize[0.7], AbsoluteThickness[1.6],
EdgeForm[{{GrayLevel[0], Opacity[0.3]}]},

{RGBColor[0.880722, 0.611041, 0.142051], PointSize[0.7], AbsoluteThickness[1.6],
EdgeForm[{{GrayLevel[0], Opacity[0.3]}]}, PointBox[NCache[{{Scaled[{{Rational[1, 2],
Rational[1, 2]}]}, {Scaled[{{0.5, 0.5}}]}]}]}]},

AspectRatio->Full,

BaselinePosition->(Scaled[0.1] -> Baseline),

```



ImagePadding->Automatic,

ImageSize->{10, 10},

PlotRangePadding->None]\)      liver

\\(\(\*

GraphicsBox[{{},

{RGBColor[0.560181, 0.691569, 0.194885], PointSize[0.7], AbsoluteThickness[1.6],  
EdgeForm[{GrayLevel[0], Opacity[0.3]}]},

{RGBColor[0.560181, 0.691569, 0.194885], PointSize[0.7], AbsoluteThickness[1.6],  
EdgeForm[{GrayLevel[0], Opacity[0.3]}], PointBox[NCache[{Scaled[{Rational[1, 2],  
Rational[1, 2]}]}, {Scaled[{0.5, 0.5}]}]}]}],

AspectRatio->Full,

BaselinePosition->(Scaled[0.1] -> Baseline),

ImagePadding->Automatic,

ImageSize->{10, 10},

PlotRangePadding->None]\)      Gi

ListPlot[z[[1]],PlotLegends->{"blood","liver","Gi"}]

\\(\(\*

GraphicsBox[{{}, {}],

{RGBColor[0.368417, 0.506779, 0.709798], PointSize[0.019444444444444445`], AbsoluteThickness[1.6], PointBox[{{30., 260.829406}, {70., 78.790912}, {90., 57.919418}, {110., 49.641256}, {130., 45.226464}, {150., 41.34165}, {170., 38.293797}, {210., 39.243422}, {270., 38.081103}, {450., 38.31765}, {750., 38.215218}, {1050., 37.337411}, {1500., 35.895027}}]},

{RGBColor[0.880722, 0.611041, 0.142051], PointSize[0.019444444444444445`], AbsoluteThickness[1.6], PointBox[{{30., 177.898123}, {70., 394.08627}, {90., 432.542377}, {110., 456.040953}, {130., 467.274313}, {150., 473.583266}, {170., 476.059768}, {210., 476.239037}, {270., 468.65291}, {450., 431.878995}, {750., 360.561313}, {1050., 308.513019}, {1500., 246.957162}}]},

{RGBColor[0.560181, 0.691569, 0.194885], PointSize[0.019444444444444445`], AbsoluteThickness[1.6], PointBox[{{30., 128.889238}, {70., 255.472349}, {90., 277.571582}, {110., 301.610403}, {130., 332.35228}, {150., 375.879715}, {170., 413.056836}, {210., 472.356497}, {270., 525.516445}, {450., 694.361139}, {750., 904.494491}, {1050., 983.637808}, {1500., 1043.905439}}]}, {}, {}],

AspectRatio->0.6180339887498948,

Axes->{True, True},

AxesLabel->{None, None},

AxesOrigin->{0, 0},

DisplayFunction->Identity,

Frame->{{False, False}, {False, False}},

FrameLabel->{{None, None}, {None, None}},

FrameTicks->{{Automatic, Automatic}, {Automatic, Automatic}},

GridLines->{None, None},

GridLinesStyle->Directive[GrayLevel[0.5, 0.4]],

Method->{},

PlotRange->{{0, 1500.}, {0, 1043.905439}},

PlotRangeClipping->True,

PlotRangePadding->{{Scaled[0.02], Scaled[0.02]}, {Scaled[0.02], Scaled[0.05]}}

Ticks->{Automatic, Automatic}] \) \!\(\\*

GraphicsBox[{{,

{RGBColor[0.368417, 0.506779, 0.709798], PointSize[0.7], AbsoluteThickness[1.6],  
EdgeForm[{GrayLevel[0], Opacity[0.3]}]},

{RGBColor[0.368417, 0.506779, 0.709798], PointSize[0.7], AbsoluteThickness[1.6],  
EdgeForm[{GrayLevel[0], Opacity[0.3]}], PointBox[NCache[{Scaled[{Rational[1, 2],  
Rational[1, 2]}]}, {Scaled[{0.5, 0.5}]}]}]}],

AspectRatio->Full,

BaselinePosition->(Scaled[0.1] -> Baseline),

ImagePadding->Automatic,

ImageSize->{10, 10},

PlotRangePadding->None] \) blood

\!\(\\*

GraphicsBox[{{,

{RGBColor[0.880722, 0.611041, 0.142051], PointSize[0.7], AbsoluteThickness[1.6],  
EdgeForm[{GrayLevel[0], Opacity[0.3]}]},

{RGBColor[0.880722, 0.611041, 0.142051], PointSize[0.7], AbsoluteThickness[1.6],  
EdgeForm[{GrayLevel[0], Opacity[0.3]}], PointBox[NCache[{Scaled[{Rational[1, 2],  
Rational[1, 2]}]}, {Scaled[{0.5, 0.5}]}]}]}],

AspectRatio->Full,

BaselinePosition->(Scaled[0.1] -> Baseline),

ImagePadding->Automatic,

ImageSize->{10, 10},

PlotRangePadding->None] \) liver

\!\(\\*

```

GraphicsBox[{{},
{RGBColor[0.560181, 0.691569, 0.194885], PointSize[0.7], AbsoluteThickness[1.6],
EdgeForm[{{GrayLevel[0], Opacity[0.3]}}],
{RGBColor[0.560181, 0.691569, 0.194885], PointSize[0.7], AbsoluteThickness[1.6],
EdgeForm[{{GrayLevel[0], Opacity[0.3]}}], PointBox[NCache[{{Scaled[{{Rational[1, 2],
Rational[1, 2]}}], {Scaled[{{0.5, 0.5}}]}}]}},
AspectRatio->Full,
BaselinePosition->(Scaled[0.1] -> Baseline),
ImagePadding->Automatic,
ImageSize->{10, 10},
PlotRangePadding->None]\)      Gi

```

```
Clear[newmodel]
```

```
newmodel[k1_,k2_,k3_,k4_,k5_,k6_][i_,t_]:=Through[model[k1,k2,k3,k4,k5,k6][t],List
][[i]] /;And@@NumericQ/@{k1,k2,k3,k4,k5,k6,i,t};
```

```
Manipulate[
```

```
Show[ListPlot[dataforfit,PlotLegends->{"blood","liver","gi"}],
```

```
Plot[Through[model[k1,k2,k3,k4,k5,k6][t]],{t,0,1500},PlotLegends-
->{"Blood","Liver","Gi"}]]
```

```
,{k1,0.001,.2},{k2,0.0001,.1},{k3,0.000001,0.01},{k4,.001,.2},{k5,0.0001,0.01}
```





Method->{"DefaultBoundaryStyle" -> Automatic, "ScalingFunctions" -> None},

PlotRange->{{0, 1500}, {-3332.499900357143, 2324.99995255102}},

PlotRangeClipping->True,

PlotRangePadding->{{Scaled[0.02], Scaled[0.02]}, {Scaled[0.05], Scaled[0.05]}},

Ticks->{Automatic, Automatic}]\]. >>

ListPlot::lpn: dataforfit is not a list of numbers or pairs of numbers. >>

ListPlot::lpn: dataforfit is not a list of numbers or pairs of numbers. >>

InterpolatingFunction::dmval: Input value {0.0306429} lies outside the range of data in the interpolating function. Extrapolation will be used. >>

InterpolatingFunction::dmval: Input value {0.0306429} lies outside the range of data in the interpolating function. Extrapolation will be used. >>

InterpolatingFunction::dmval: Input value {0.0306429} lies outside the range of data in the interpolating function. Extrapolation will be used. >>

General::stop: Further output of InterpolatingFunction::dmval will be suppressed during this calculation. >>

Show::gcomb: Could not combine the graphics objects in  
Show[ListPlot[dataforfit,PlotLegends->{blood,liver,gi}],\!\(\

GraphicsBox[{{}, {}],

{RGBColor[0.368417, 0.506779, 0.709798], AbsoluteThickness[1.6], Opacity[1.],  
LineBox[{{Skeleton[2]}, {Skeleton[2]}, {Skeleton[2]}, {Skeleton[2]}, {Skeleton[2]},  
{Skeleton[2]}, {Skeleton[2]}, {Skeleton[2]}, {Skeleton[2]}, {Skeleton[2]},  
Skeleton[27]}, LineBox[{{Skeleton[2]}, {Skeleton[2]}, {Skeleton[2]}, {Skeleton[2]},  
{Skeleton[2]}, {Skeleton[2]}, {Skeleton[2]}, {Skeleton[2]}, {Skeleton[2]},  
{Skeleton[2]}, {Skeleton[2]}, {Skeleton[2]}, {Skeleton[2]}, {Skeleton[2]},  
{Skeleton[2]}, {Skeleton[2]}, {Skeleton[2]}, {Skeleton[2]}, {Skeleton[2]},

{Skeleton[2]}, {Skeleton[2]}, {Skeleton[2]}, {Skeleton[2]}, {Skeleton[2]},  
{Skeleton[2]}, {Skeleton[2]}, {Skeleton[2]}, {Skeleton[2]}, {Skeleton[2]},  
{Skeleton[2]}, {Skeleton[2]}, {Skeleton[2]}, {Skeleton[2]}, {Skeleton[2]},  
{Skeleton[2]}, {Skeleton[2]}, {Skeleton[2]}, {Skeleton[2]}, {Skeleton[2]},  
{Skeleton[2]}, {Skeleton[2]}, {Skeleton[2]}, {Skeleton[2]}, {Skeleton[2]},  
{Skeleton[2]}, {Skeleton[2]}, {Skeleton[2]}, {Skeleton[2]}, {Skeleton[2]},  
{Skeleton[2]}, Skeleton[27]], LineBox[{{Skeleton[2]}, {Skeleton[2]}, {Skeleton[2]},  
{Skeleton[2]}, {Skeleton[2]}, {Skeleton[2]}, {Skeleton[2]}, {Skeleton[2]},  
{Skeleton[2]}, {Skeleton[2]}, Skeleton[27]]]],

AspectRatio->0.6180339887498948,

Axes->{True, True},

AxesLabel->{None, None},

AxesOrigin->{0, 0},

DisplayFunction->Identity,

Frame->{{False, False}, {False, False}},

FrameLabel->{{None, None}, {None, None}},

FrameTicks->{{Automatic, Automatic}, {Automatic, Automatic}},

GridLines->{None, None},

GridLinesStyle->Directive[GrayLevel[0.5, 0.4]],

Method->{"DefaultBoundaryStyle" -> Automatic, "ScalingFunctions" -> None},

PlotRange->{{0, 1500}, {-3332.499900357143, 2324.99995255102}},

PlotRangeClipping->True,

PlotRangePadding->{{Scaled[0.02], Scaled[0.02]}, {Scaled[0.05], Scaled[0.05]}}



Ticks->{Automatic, Automatic}]\]. >>

ListPlot::lpn: dataforfit is not a list of numbers or pairs of numbers. >>

ListPlot::lpn: dataforfit is not a list of numbers or pairs of numbers. >>

ListPlot::lpn: dataforfit is not a list of numbers or pairs of numbers. >>

General::stop: Further output of ListPlot::lpn will be suppressed during this calculation. >>

Show::gcomb: Could not combine the graphics objects in  
Show[ListPlot[dataforfit,PlotLegends->{blood,liver,gi}],\!\(\

GraphicsBox[{}],

AspectRatio->0.6180339887498948,

Axes->{True, True},

AxesLabel->{None, None},

AxesOrigin->{0, 0},

DisplayFunction->Identity,

Frame->{{False, False}, {False, False}},

FrameLabel->{{None, None}, {None, None}},

FrameTicks->{{Automatic, Automatic}, {Automatic, Automatic}},

GridLines->{None, None},

GridLinesStyle->Directive[GrayLevel[0.5, 0.4]],

Method->{"DefaultBoundaryStyle" -> Automatic, "ScalingFunctions" -> None},

PlotRange->{{0, 1500}, {0., 0.}},

PlotRangeClipping->True,

PlotRangePadding->{{Scaled[0.02], Scaled[0.02]}, {Scaled[0.05], Scaled[0.05]}},

Ticks->{Automatic, Automatic}]\]. >>

ListPlot::lpn: dataforfit is not a list of numbers or pairs of numbers. >>

ListPlot::lpn: dataforfit is not a list of numbers or pairs of numbers. >>

Show::gcomb: Could not combine the graphics objects in  
Show[ListPlot[dataforfit,PlotLegends->{blood,liver,gi}],\!\{\}

GraphicsBox[{}],

AspectRatio->0.6180339887498948,

Axes->{True, True},

AxesLabel->{None, None},

AxesOrigin->{0, 0},

DisplayFunction->Identity,

Frame->{{False, False}, {False, False}},

FrameLabel->{{None, None}, {None, None}},

FrameTicks->{{Automatic, Automatic}, {Automatic, Automatic}},

GridLines->{None, None},

GridLinesStyle->Directive[GrayLevel[0.5, 0.4]],

Method->{"DefaultBoundaryStyle" -> Automatic, "ScalingFunctions" -> None},

PlotRange->{{0, 1500}, {0., 0.}},

PlotRangeClipping->True,

PlotRangePadding->{{Scaled[0.02], Scaled[0.02]}, {Scaled[0.05], Scaled[0.05]}},

Ticks->{Automatic, Automatic}\}\]. >>

ParametricNDSolveValue::fpct: Too many parameters in {k1,k2,k3,k4,k5,k6} to be filled from {0.001,0.0001,1.\*10^-6,0.001,0.0001}. >>

ParametricNDSolveValue::fpct: Too many parameters in {k1,k2,k3,k4,k5,k6} to be filled from {0.001[0.0306429],0.0001[0.0306429],1.\*10^-6[0.0306429],0.001[0.0306429],0.0001[0.0306429]}. >>

ParametricNDSolveValue::fpct: Too many parameters in {k1,k2,k3,k4,k5,k6} to be filled from {0.001,0.0001,1.\*10^-6,0.001,0.0001}. >>

General::stop: Further output of ParametricNDSolveValue::fpct will be suppressed during this calculation. >>

ParametricNDSolveValue::fpct: Too many parameters in {k1,k2,k3,k4,k5,k6} to be filled from {0.001,0.0001,1.\*10^-6,0.001,0.0001}. >>

ParametricNDSolveValue::fpct: Too many parameters in {k1,k2,k3,k4,k5,k6} to be filled from {0.001[0.0306429],0.0001[0.0306429],1.\*10^-6[0.0306429],0.001[0.0306429],0.0001[0.0306429]}. >>

ParametricNDSolveValue::fpct: Too many parameters in {k1,k2,k3,k4,k5,k6} to be filled from {0.001,0.0001,1.\*10^-6,0.001,0.0001}. >>

General::stop: Further output of ParametricNDSolveValue::fpct will be suppressed during this calculation. >>

ListPlot::lpn: dataforfit is not a list of numbers or pairs of numbers. >>

ListPlot::lpn: dataforfit is not a list of numbers or pairs of numbers. >>

ListPlot::lpn: dataforfit is not a list of numbers or pairs of numbers. >>

General::stop: Further output of ListPlot::lpn will be suppressed during this calculation. >>

Show::gcomb: Could not combine the graphics objects in  
Show[ListPlot[dataforfit,PlotLegends->{blood,liver,gi}],\!\(\\*

GraphicsBox[{},

AspectRatio->0.6180339887498948,

Axes->{True, True},

AxesLabel->{None, None},

AxesOrigin->{0, 0},

DisplayFunction->Identity,

Frame->{{False, False}, {False, False}},

FrameLabel->{{None, None}, {None, None}},

```
FrameTicks->{{Automatic, Automatic}, {Automatic, Automatic}},
GridLines->{None, None},
GridLinesStyle->Directive[GrayLevel[0.5, 0.4]],
Method->{"DefaultBoundaryStyle" -> Automatic, "ScalingFunctions" -> None},
PlotRange->{{0, 1500}, {0., 0.}},
PlotRangeClipping->True,
PlotRangePadding->{{Scaled[0.02], Scaled[0.02]}, {Scaled[0.05], Scaled[0.05]}},
Ticks->{Automatic, Automatic}\)]. >>

ListPlot::lpln: dataforfit is not a list of numbers or pairs of numbers. >>

ListPlot::lpln: dataforfit is not a list of numbers or pairs of numbers. >>

Show::gcomb: Could not combine the graphics objects in
Show[ListPlot[dataforfit,PlotLegends->{blood,liver,gi}],\!\(\^*

GraphicsBox[{}],

AspectRatio->0.6180339887498948,

Axes->{True, True},

AxesLabel->{None, None},

AxesOrigin->{0, 0},

DisplayFunction->Identity,

Frame->{{False, False}, {False, False}},

FrameLabel->{{None, None}, {None, None}},

FrameTicks->{{Automatic, Automatic}, {Automatic, Automatic}},

GridLines->{None, None},

GridLinesStyle->Directive[GrayLevel[0.5, 0.4]],
```

```
Method->{"DefaultBoundaryStyle" -> Automatic, "ScalingFunctions" -> None},
PlotRange->{{0, 1500}, {0., 0.}},
PlotRangeClipping->True,
PlotRangePadding->{{Scaled[0.02], Scaled[0.02]}, {Scaled[0.05], Scaled[0.05]}},
Ticks->{Automatic, Automatic}\)]. >>

ListPlot::lpn: dataforfit is not a list of numbers or pairs of numbers. >>

ListPlot::lpn: dataforfit is not a list of numbers or pairs of numbers. >>

ListPlot::lpn: dataforfit is not a list of numbers or pairs of numbers. >>

General::stop: Further output of ListPlot::lpn will be suppressed during this
calculation. >>

Show::gcomb: Could not combine the graphics objects in
Show[ListPlot[dataforfit,PlotLegends->{blood,liver,gi}],\!\(\^*

GraphicsBox[{}],

AspectRatio->0.6180339887498948,

Axes->{True, True},

AxesLabel->{None, None},

AxesOrigin->{0, 0},

DisplayFunction->Identity,

Frame->{{False, False}, {False, False}},

FrameLabel->{{None, None}, {None, None}},

FrameTicks->{{Automatic, Automatic}, {Automatic, Automatic}},

GridLines->{None, None},

GridLinesStyle->Directive[GrayLevel[0.5, 0.4]],

Method->{"DefaultBoundaryStyle" -> Automatic, "ScalingFunctions" -> None},
```

PlotRange->{{0, 1500}, {0., 0.}},  
PlotRangeClipping->True,  
PlotRangePadding->{{Scaled[0.02], Scaled[0.02]}, {Scaled[0.05], Scaled[0.05]}},  
Ticks->{Automatic, Automatic}\]. >>  
ListPlot::lpln: dataforfit is not a list of numbers or pairs of numbers. >>  
ListPlot::lpln: dataforfit is not a list of numbers or pairs of numbers. >>  
Show::gcomb: Could not combine the graphics objects in  
Show[ListPlot[dataforfit,PlotLegends->{blood,liver,gi}],\!\(\(\*  
GraphicsBox[{}],  
AspectRatio->0.6180339887498948,  
Axes->{True, True},  
AxesLabel->{None, None},  
AxesOrigin->{0, 0},  
DisplayFunction->Identity,  
Frame->{{False, False}, {False, False}},  
FrameLabel->{{None, None}, {None, None}},  
FrameTicks->{{Automatic, Automatic}, {Automatic, Automatic}},  
GridLines->{None, None},  
GridLinesStyle->Directive[GrayLevel[0.5, 0.4]],  
Method->{"DefaultBoundaryStyle" -> Automatic, "ScalingFunctions" -> None},  
PlotRange->{{0, 1500}, {0., 0.}},  
PlotRangeClipping->True,  
PlotRangePadding->{{Scaled[0.02], Scaled[0.02]}, {Scaled[0.05], Scaled[0.05]}},  
Ticks->{Automatic, Automatic}\]. >>

ListPlot::lpr: dataforfit is not a list of numbers or pairs of numbers. >>

ListPlot::lpr: dataforfit is not a list of numbers or pairs of numbers. >>

Show::gcomb: Could not combine the graphics objects in  
Show[ListPlot[dataforfit,PlotLegends->{blood,liver,gi}],\!\(\\*

GraphicsBox[{}],

AspectRatio->0.6180339887498948,

Axes->{True, True},

AxesLabel->{None, None},

AxesOrigin->{0, 0},

DisplayFunction->Identity,

Frame->{{False, False}, {False, False}},

FrameLabel->{{None, None}, {None, None}},

FrameTicks->{{Automatic, Automatic}, {Automatic, Automatic}},

GridLines->{None, None},

GridLinesStyle->Directive[GrayLevel[0.5, 0.4]],

Method->{"DefaultBoundaryStyle" -> Automatic, "ScalingFunctions" -> None},

PlotRange->{{0, 1500}, {0., 0.}},

PlotRangeClipping->True,

PlotRangePadding->{{Scaled[0.02], Scaled[0.02]}, {Scaled[0.05], Scaled[0.05]}},

Ticks->{Automatic, Automatic}\)]. >>

ListPlot::lpr: dataforfit is not a list of numbers or pairs of numbers. >>

ListPlot::lpr: dataforfit is not a list of numbers or pairs of numbers. >>

Show::gcomb: Could not combine the graphics objects in  
Show[ListPlot[dataforfit,PlotLegends->{blood,liver,gi}],\!\(\\*

```
GraphicsBox[{}],
AspectRatio->0.6180339887498948,
Axes->{True, True},
AxesLabel->{None, None},
AxesOrigin->{0, 0},
DisplayFunction->Identity,
Frame->{{False, False}, {False, False}},
FrameLabel->{{None, None}, {None, None}},
FrameTicks->{{Automatic, Automatic}, {Automatic, Automatic}},
GridLines->{None, None},
GridLinesStyle->Directive[GrayLevel[0.5, 0.4]],
Method->{"DefaultBoundaryStyle" -> Automatic, "ScalingFunctions" -> None},
PlotRange->{{0, 1500}, {0., 0.}},
PlotRangeClipping->True,
PlotRangePadding->{{Scaled[0.02], Scaled[0.02]}, {Scaled[0.05], Scaled[0.05]}}},
Ticks->{Automatic, Automatic}]\]. >>

ListPlot::lpln: dataforfit is not a list of numbers or pairs of numbers. >>

ListPlot::lpln: dataforfit is not a list of numbers or pairs of numbers. >>

Show::gcomb: Could not combine the graphics objects in
Show[ListPlot[dataforfit,PlotLegends->{blood,liver,gi}],\!\(\^*

GraphicsBox[{}],
AspectRatio->0.6180339887498948,
Axes->{True, True},
```



AxesLabel->{None, None},  
AxesOrigin->{0, 0},  
DisplayFunction->Identity,  
Frame->{{False, False}, {False, False}},  
FrameLabel->{{None, None}, {None, None}},  
FrameTicks->{{Automatic, Automatic}, {Automatic, Automatic}},  
GridLines->{None, None},  
GridLinesStyle->Directive[GrayLevel[0.5, 0.4]],  
Method->{"DefaultBoundaryStyle" -> Automatic, "ScalingFunctions" -> None},  
PlotRange->{{0, 1500}, {0., 0.}},  
PlotRangeClipping->True,  
PlotRangePadding->{{Scaled[0.02], Scaled[0.02]}, {Scaled[0.05], Scaled[0.05]}},  
Ticks->{Automatic, Automatic}\]. >>  
ListPlot::lpn: dataforfit is not a list of numbers or pairs of numbers. >>  
ListPlot::lpn: dataforfit is not a list of numbers or pairs of numbers. >>  
Show::gcomb: Could not combine the graphics objects in  
Show[ListPlot[dataforfit,PlotLegends->{blood,liver,gi}],\!\(\^\*  
GraphicsBox[{}],  
AspectRatio->0.6180339887498948,  
Axes->{True, True},  
AxesLabel->{None, None},  
AxesOrigin->{0, 0},  
DisplayFunction->Identity,  
Frame->{{False, False}, {False, False}},

FrameLabel->{{None, None}, {None, None}},

FrameTicks->{{Automatic, Automatic}, {Automatic, Automatic}},

GridLines->{None, None},

GridLinesStyle->Directive[GrayLevel[0.5, 0.4]],

Method->{"DefaultBoundaryStyle" -> Automatic, "ScalingFunctions" -> None},

PlotRange->{{0, 1500}, {0., 0.}},

PlotRangeClipping->True,

PlotRangePadding->{{Scaled[0.02], Scaled[0.02]}, {Scaled[0.05], Scaled[0.05]}}

Ticks->{Automatic, Automatic}\]. >>

Table::iterb: Iterator {i,1,{[[1]]} does not have appropriate bounds. >>

Table::iterb: Iterator {i,1,{[[1]]} does not have appropriate bounds. >>

Table::iterb: Iterator {i,1,{[[1]]} does not have appropriate bounds. >>

General::stop: Further output of Table::iterb will be suppressed during this calculation. >>

ParametricNDSolveValue::fpct: Too many parameters in {k1,k2,k3,k4,k5,k6} to be filled from {0.001,0.0001,1.\*10^-6,0.001,0.0001}. >>

ParametricNDSolveValue::fpct: Too many parameters in {k1,k2,k3,k4,k5,k6} to be filled from {0.001[0.0306429],0.0001[0.0306429],1.\*10^-6[0.0306429],0.001[0.0306429],0.0001[0.0306429]}. >>

ParametricNDSolveValue::fpct: Too many parameters in {k1,k2,k3,k4,k5,k6} to be filled from {0.001,0.0001,1.\*10^-6,0.001,0.0001}. >>

General::stop: Further output of ParametricNDSolveValue::fpct will be suppressed during this calculation. >>

ListPlot::lpln: dataforfit is not a list of numbers or pairs of numbers. >>

ListPlot::lpln: dataforfit is not a list of numbers or pairs of numbers. >>

ListPlot::lpln: dataforfit is not a list of numbers or pairs of numbers. >>

General::stop: Further output of ListPlot::lpn will be suppressed during this calculation. >>

Show::gcomb: Could not combine the graphics objects in  
Show[ListPlot[dataforfit,PlotLegends->{blood,liver,gi}],\!\(\

GraphicsBox[{},

AspectRatio->0.6180339887498948,

Axes->{True, True},

AxesLabel->{None, None},

AxesOrigin->{0, 0},

DisplayFunction->Identity,

Frame->{{False, False}, {False, False}},

FrameLabel->{{None, None}, {None, None}},

FrameTicks->{{Automatic, Automatic}, {Automatic, Automatic}},

GridLines->{None, None},

GridLinesStyle->Directive[GrayLevel[0.5, 0.4]],

Method->{"DefaultBoundaryStyle" -> Automatic, "ScalingFunctions" -> None},

PlotRange->{{0, 1500}, {0., 0.}},

PlotRangeClipping->True,

PlotRangePadding->{{Scaled[0.02], Scaled[0.02]}, {Scaled[0.05], Scaled[0.05]}},

Ticks->{Automatic, Automatic}\)]. >>

ListPlot::lpn: dataforfit is not a list of numbers or pairs of numbers. >>

ListPlot::lpn: dataforfit is not a list of numbers or pairs of numbers. >>

Show::gcomb: Could not combine the graphics objects in  
Show[ListPlot[dataforfit,PlotLegends->{blood,liver,gi}],\!\(\

```

GraphicsBox[{}],
AspectRatio->0.6180339887498948,
Axes->{True, True},
AxesLabel->{None, None},
AxesOrigin->{0, 0},
DisplayFunction->Identity,
Frame->{{False, False}, {False, False}},
FrameLabel->{{None, None}, {None, None}},
FrameTicks->{{Automatic, Automatic}, {Automatic, Automatic}},
GridLines->{None, None},
GridLinesStyle->Directive[GrayLevel[0.5, 0.4]],
Method->{"DefaultBoundaryStyle" -> Automatic, "ScalingFunctions" -> None},
PlotRange->{{0, 1500}, {0., 0.}},
PlotRangeClipping->True,
PlotRangePadding->{{Scaled[0.02], Scaled[0.02]}, {Scaled[0.05], Scaled[0.05]}},
Ticks->{Automatic, Automatic}\]. >>

ParametricNDSolveValue::fpct: Too many parameters in {k1,k2,k3,k4,k5,k6,k6} to
be filled from {0.001,0.0001,1.*10^-6,0.001,0.0001}. >>

ParametricNDSolveValue::fpct: Too many parameters in {k1,k2,k3,k4,k5,k6,k6} to
be filled from {0.001[0.0306429],0.0001[0.0306429],1.*10^-
6[0.0306429],0.001[0.0306429],0.0001[0.0306429]}. >>

ParametricNDSolveValue::fpct: Too many parameters in {k1,k2,k3,k4,k5,k6,k6} to
be filled from {0.001,0.0001,1.*10^-6,0.001,0.0001}. >>

General::stop: Further output of ParametricNDSolveValue::fpct will be suppressed
during this calculation. >>

ListPlot::lpn: dataforfit is not a list of numbers or pairs of numbers. >>

```

ListPlot::lpn: dataforfit is not a list of numbers or pairs of numbers. >>

ListPlot::lpn: dataforfit is not a list of numbers or pairs of numbers. >>

General::stop: Further output of ListPlot::lpn will be suppressed during this calculation. >>

Show::gcomb: Could not combine the graphics objects in  
Show[ListPlot[dataforfit,PlotLegends->{blood,liver,gi}],\!\(\\*

GraphicsBox[{}],

AspectRatio->0.6180339887498948,

Axes->{True, True},

AxesLabel->{None, None},

AxesOrigin->{0, 0},

DisplayFunction->Identity,

Frame->{{False, False}, {False, False}},

FrameLabel->{{None, None}, {None, None}},

FrameTicks->{{Automatic, Automatic}, {Automatic, Automatic}},

GridLines->{None, None},

GridLinesStyle->Directive[GrayLevel[0.5, 0.4]],

Method->{"DefaultBoundaryStyle" -> Automatic, "ScalingFunctions" -> None},

PlotRange->{{0, 1500}, {0., 0.}},

PlotRangeClipping->True,

PlotRangePadding->{{Scaled[0.02], Scaled[0.02]}, {Scaled[0.05], Scaled[0.05]}},

Ticks->{Automatic, Automatic}\)]. >>

ListPlot::lpn: dataforfit is not a list of numbers or pairs of numbers. >>

ListPlot::lpn: dataforfit is not a list of numbers or pairs of numbers. >>

Show::gcomb: Could not combine the graphics objects in  
Show[ListPlot[dataforfit,PlotLegends->{blood,liver,gi}],\!\(\^\*

GraphicsBox[{},

AspectRatio->0.6180339887498948,

Axes->{True, True},

AxesLabel->{None, None},

AxesOrigin->{0, 0},

DisplayFunction->Identity,

Frame->{{False, False}, {False, False}},

FrameLabel->{{None, None}, {None, None}},

FrameTicks->{{Automatic, Automatic}, {Automatic, Automatic}},

GridLines->{None, None},

GridLinesStyle->Directive[GrayLevel[0.5, 0.4]],

Method->{"DefaultBoundaryStyle" -> Automatic, "ScalingFunctions" -> None},

PlotRange->{{0, 1500}, {0., 0.}},

PlotRangeClipping->True,

PlotRangePadding->{{Scaled[0.02], Scaled[0.02]}, {Scaled[0.05], Scaled[0.05]}}},

Ticks->{Automatic, Automatic}]\)]. >>

ListPlot::lpn: dataforfit is not a list of numbers or pairs of numbers. >>

ListPlot::lpn: dataforfit is not a list of numbers or pairs of numbers. >>

ListPlot::lpn: dataforfit is not a list of numbers or pairs of numbers. >>

General::stop: Further output of ListPlot::lpn will be suppressed during this calculation. >>

Show::gcomb: Could not combine the graphics objects in  
Show[ListPlot[dataforfit,PlotLegends->{blood,liver,gi}],\!\(\

GraphicsBox[{}],

AspectRatio->0.6180339887498948,

Axes->{True, True},

AxesLabel->{None, None},

AxesOrigin->{0, 0},

DisplayFunction->Identity,

Frame->{{False, False}, {False, False}},

FrameLabel->{{None, None}, {None, None}},

FrameTicks->{{Automatic, Automatic}, {Automatic, Automatic}},

GridLines->{None, None},

GridLinesStyle->Directive[GrayLevel[0.5, 0.4]],

Method->{"DefaultBoundaryStyle" -> Automatic, "ScalingFunctions" -> None},

PlotRange->{{0, 1500}, {0., 0.}},

PlotRangeClipping->True,

PlotRangePadding->{{Scaled[0.02], Scaled[0.02]}, {Scaled[0.05], Scaled[0.05]}}

Ticks->{Automatic, Automatic}\]. >>

ListPlot::lpn: dataforfit is not a list of numbers or pairs of numbers. >>

ListPlot::lpn: dataforfit is not a list of numbers or pairs of numbers. >>

Show::gcomb: Could not combine the graphics objects in  
Show[ListPlot[dataforfit,PlotLegends->{blood,liver,gi}],\!\(\

GraphicsBox[{}],

AspectRatio->0.6180339887498948,

Axes->{True, True},  
 AxesLabel->{None, None},  
 AxesOrigin->{0, 0},  
 DisplayFunction->Identity,  
 Frame->{{False, False}, {False, False}},  
 FrameLabel->{{None, None}, {None, None}},  
 FrameTicks->{{Automatic, Automatic}, {Automatic, Automatic}},  
 GridLines->{None, None},  
 GridLinesStyle->Directive[GrayLevel[0.5, 0.4]],  
 Method->{"DefaultBoundaryStyle" -> Automatic, "ScalingFunctions" -> None},  
 PlotRange->{{0, 1500}, {0., 0.}},  
 PlotRangeClipping->True,  
 PlotRangePadding->{{Scaled[0.02], Scaled[0.02]}, {Scaled[0.05], Scaled[0.05]}},  
 Ticks->{Automatic, Automatic}\]. >>  
 ParametricNDSolveValue::fpct: Too many parameters in {k1,k2,k3,k4,k5,k6} to be filled from {0.001,0.0001,1.\*10^-6,0.001,0.0001}. >>  
 ParametricNDSolveValue::fpct: Too many parameters in {k1,k2,k3,k4,k5,k6} to be filled from {0.001[0.0306429],0.0001[0.0306429],1.\*10^-6[0.0306429],0.001[0.0306429],0.0001[0.0306429]}. >>  
 ParametricNDSolveValue::fpct: Too many parameters in {k1,k2,k3,k4,k5,k6} to be filled from {0.001,0.0001,1.\*10^-6,0.001,0.0001}. >>  
 General::stop: Further output of ParametricNDSolveValue::fpct will be suppressed during this calculation. >>  
 ParametricNDSolveValue::fpct: Too many parameters in {k1,k2,k3,k4,k5,k6} to be filled from {0.001,0.0001,1.\*10^-6,0.001,0.0001}. >>



ParametricNDSolveValue::fpct: Too many parameters in {k1,k2,k3,k4,k5,k6} to be filled from {0.001[0.0306429],0.0001[0.0306429],1.\*10^-6[0.0306429],0.001[0.0306429],0.0001[0.0306429]}. >>

ParametricNDSolveValue::fpct: Too many parameters in {k1,k2,k3,k4,k5,k6} to be filled from {0.001,0.0001,1.\*10^-6,0.001,0.0001}. >>

General::stop: Further output of ParametricNDSolveValue::fpct will be suppressed during this calculation. >>

ListPlot::lpn: dataforfit is not a list of numbers or pairs of numbers. >>

ListPlot::lpn: dataforfit is not a list of numbers or pairs of numbers. >>

ListPlot::lpn: dataforfit is not a list of numbers or pairs of numbers. >>

General::stop: Further output of ListPlot::lpn will be suppressed during this calculation. >>

Show::gcomb: Could not combine the graphics objects in Show[ListPlot[dataforfit,PlotLegends->{blood,liver,gi}],\!\(\

GraphicsBox[{},

AspectRatio->0.6180339887498948,

Axes->{True, True},

AxesLabel->{None, None},

AxesOrigin->{0, 0},

DisplayFunction->Identity,

Frame->{{False, False}, {False, False}},

FrameLabel->{{None, None}, {None, None}},

FrameTicks->{{Automatic, Automatic}, {Automatic, Automatic}},

GridLines->{None, None},

GridLinesStyle->Directive[GrayLevel[0.5, 0.4]],

Method->{"DefaultBoundaryStyle" -> Automatic, "ScalingFunctions" -> None},

```
PlotRange->{{0, 1500}, {0., 0.}},
```

```
PlotRangeClipping->True,
```

```
PlotRangePadding->{{Scaled[0.02], Scaled[0.02]}, {Scaled[0.05], Scaled[0.05]}},
```

```
Ticks->{Automatic, Automatic}\]. >>
```

(\* it appears that if I manually fix the first two parameters it convergest nicely to a solution, then if I iterate back and put in the fitted values for k3,k4,k5 and let k1,k2 float I get a reasonable answer; in the end the global fit works fine after a pilot test use global fit \*)

```
Clear[fit,k1,k2,k3,k4,k5,k6]
```

```
fit=
```

```
NonlinearModelFit[newdataforfit,{newmodel[k1,k2,k3,k4,k5,k6][i,t],{k1>=0},{k2>0},  
{k3>=0},{k4>=0},{k5>=0}},{k1,0.0178},{k2,0.00015},{k3,.0001},{k4,0.0052},{k5,0.  
004}},{i,t}]
```

NonlinearModelFit::eit: The algorithm does not converge to the tolerance of  $4.806217383937354 \times 10^{-6}$  in 500 iterations. The best estimated solution, with feasibility residual, KKT residual, or complementary residual of  $\{3.99224 \times 10^{-12}, 0.00002615, 1.4154 \times 10^{-12}\}$ , is returned. >>

```
FittedModel[newmodel[0.0161195,0.000723143,0.000596752,0.00605331,0.0263  
591][i,t]]
```

```
fit["RSquared"]
```

```
0.986316
```

```
fit["ParameterTable"]
```

FittedModel::constr: The property values {ParameterTable} assume an unconstrained model. The results for these properties may not be valid, particularly if the fitted parameters are near a constraint boundary. >>

|    | Estimate    | Standard Error | t-Statistic | P-Value                   |
|----|-------------|----------------|-------------|---------------------------|
| k1 | 0.0161195   | 0.00153691     | 10.4882     | $3.39356 \times 10^{-12}$ |
| k2 | 0.000723143 | 0.000190868    | 3.78871     | 0.000590712               |
| k3 | 0.000596752 | 0.0000896366   | 6.65746     | $1.22167 \times 10^{-7}$  |

k4 0.00605331 0.00112719 5.37026 5.67586\*10^-6  
k5 0.0263591 0.00262437 10.0441.04237\*10^-11

```
Show[ListPlot[z[[1]],PlotLegends-  
>{"blood","liver","gi"},Plot[{fit[1,t],fit[2,t],fit[3,t]},{t,0,1500}]  
]
```

\\(\^\*

```
GraphicsBox[{{}, {},
```

```
{RGBColor[0.368417, 0.506779, 0.709798], PointSize[0.019444444444444445`],  
AbsoluteThickness[1.6], PointBox[{{30., 260.829406}, {70., 78.790912}, {90.,  
57.919418}, {110., 49.641256}, {130., 45.226464}, {150., 41.34165}, {170.,  
38.293797}, {210., 39.243422}, {270., 38.081103}, {450., 38.31765}, {750.,  
38.215218}, {1050., 37.337411}, {1500., 35.895027}}]},
```

```
{RGBColor[0.880722, 0.611041, 0.142051], PointSize[0.019444444444444445`],  
AbsoluteThickness[1.6], PointBox[{{30., 177.898123}, {70., 394.08627}, {90.,  
432.542377}, {110., 456.040953}, {130., 467.274313}, {150., 473.583266}, {170.,  
476.059768}, {210., 476.239037}, {270., 468.65291}, {450., 431.878995}, {750.,  
360.561313}, {1050., 308.513019}, {1500., 246.957162}}]},
```

```
{RGBColor[0.560181, 0.691569, 0.194885], PointSize[0.019444444444444445`],  
AbsoluteThickness[1.6], PointBox[{{30., 128.889238}, {70., 255.472349}, {90.,  
277.571582}, {110., 301.610403}, {130., 332.35228}, {150., 375.879715}, {170.,  
413.056836}, {210., 472.356497}, {270., 525.516445}, {450., 694.361139}, {750.,  
904.494491}, {1050., 983.637808}, {1500., 1043.905439}}]}, {}, {}, {}, {},
```

```
{RGBColor[0.368417, 0.506779, 0.709798], AbsoluteThickness[1.6], Opacity[1.],  
LineBox[CompressedData["
```

1:e]wVl3k4Vd8XxkWEJkKMIWR2zVxz4U1myjxknu41laEQSikzGTLdlCQhUWSW

Sl9Tk3lIKUolIkQqIfU7v7/O83ne96xn77XWPmcvAfcACwo9HR0deQMd3f+f

cvWP7tey0WkxOtkUratcBnmVTW0yaEzrhpB71e5KGG5sV2cqCZrTCm2JLNMh

OdByvW82NmhdSz21]vyEaA4Y]nePhwRtQahX+ISgdhaeUHQ096dxYH9r+A2u

vkWkvY4om6Jy4sL5iY36rpnY3jzluWMnF/ielxexJ2RAOLF15HgQH5j2NMY2  
LKXjy9qycowBP2oWXZ/LZqXDRoXbqDttHyR7lEufKqjd9nhW5+ogjhV2vjA  
ZGMaitKa3Dh2imK8+o3oA9eLYHpunX6VTgyWZXuD97Ykw5t+sVl0VgzXFYui  
2UWSIRUitkejYR7x30EdJYTUWefNewTJI2hPMu3U63x4MmSZfzPKIPSyE+s  
GRrxioh+QY4ykIV/43+3FR7Egb8gyqAzTQ6vunondz6OxSf0huIPVAUUhx1S  
LpyKRlblRo1bowqIZ6tt0gqLhp6JxdAxCzKGakvCbTdHozR2jv63hiLGJIOP  
PVS9gGO/hVzZdypDYPmW0VRFFPiYg5YHk5TRndqh8tY8Cj3yj1Nz6VRwm/r+  
TcvcOcj52T8SnIVBlFo/ZTLHLH6Mpe/a36aG7/VLvbNrp1Ec8a6KTK0db9nO  
vAl3PQ0bbinDjxXqYDEWPn/6WQQazZ6eMr+yH3ZN1ANpheGlbFsf8grSgEHa  
DeVvZ06h4mNy0M5FDZT//editBCKdxt2sbcFamJTftU1Fq9QAMr6ew01cLBW  
7rurcwguODc4+jYAW5Ib9mqeOlld/n8lDi4Da9OvrRL+nkBNp04Kt8pBvJI0  
K8pLOYGJvMHsjnqCdzmmjNYEQfft5599dow4rWRW9kbiHczyteWf2rDek/a  
Ssq5AISuRvr1KB0Ca3BRU30HP0p42ZjP1B1CrSZr7EmX42C2Ez/4qlYHeun6  
DDodvijwCtha8UMHI+8smgvEfaF2qn4sRIEXBo1dUe1pPvDN0YlQqNWFy4jy  
R0Yfb3QOudak10gh5qIq15oOFZ4Tt857LukhdE0kuEA7BX+W5k33k/XR4u7l  
4qFHgdT2yNkv1fqIHL3snbP0RKp5rohOtQE0qwT4+S65Q9RtfGnXdwOslk/c  
3ifmjseBYq2L8ob4rZTiWP3YDQtpdc7XqwwRGG4lcvC3K8x7+mmr94yQYrsp  
dprVBTnjPNT+BSN8ZMluTHV0xoU5F8VSOWPIcvX3elc7oZptvs/6njGYyujH  
bH0dscOYlbWq0gReB5Jyjfjntccfe/HX8NxpK+ZILM4Ufha7v5RJn2cOYG1na  
zDtnh9BE0UNslYehey2y+8h7W7x6qn3Gq+IliocLTJqmrRE680ufYeYIZjPC  
uZJPW4NrS/n26yKmMOSz4BnZag0bi+3lw3mmGlz8GlilZQXf+cXZQl0z8I+s  
FI01WaDpX+dAoIcZzMa1GLldLMC6raRR87wZwoXon7ozWuA22T7mzUMzGj1+  
uURvZ44vYa27ORXNEanJ2y2zwwyqSXkbxs3NkTeirH8uzRQJV0On7gaYQ/AM

b//O1SMQa5aoMSwn3ttyhs165DCoDJIG5wUtkC/Ebc3Ublz6HcflTGGBs78+  
jzzUJPlkqs/F52yBR4nfeqxbjVBssPahMdcCBspaR+b6DTGR4hG+wGGJ4oaV  
+nkOAYhe13BplrGEpU70tpUSfcTc49a9aGIJ+9BHXH5a+hAa70QQTyD8ieu5  
h0/pwZ1HsdTlnyUOmHtZXt6gi2oSe6o0nxVE5sXafG7rgH7/l5Nr6lY4VuH/  
d7+lDm445WnRQq0wa9emXHPnEMYLN77qmbPCPv/uXS0h2pCrffcbw7M1yr7w  
nvaQ0kZUR20hL8kaghbVFfcmDoL/yzF/Joo1HjF45InaH4Sz9EtGzVFrPBWf  
mYixBSO0K79uXrXGKdToR+0C/pom9o9w26BMeBds8SMt5J/QuBZiaYNbH3ey  
HX2libGGYsW7L2zApuQtaEjSAEesT8DnKRswcEU693QcgLaFdBkfoY2kDW7v  
TvM8gJLZWv5ULVtE39X+k166H/4C7awBtbYw211ZpGmojoL5eN1b/bZ4sz/e  
1PiXGgYeGEe9n7ffh9JUbUviNajYDP40JdkhvPnEZASzGuiSP47L5dvB1exn  
RvEnFSjYlez2eWAHJzPnh7H5KvAU8bW58do01qe003/aq+DZ48XObduPllpY  
v87ltTlu/aBr+B5/FGTBYcGwCSW0t7QvShQfRVQy85UvZUr4lZog5dF6FLty  
+GdKTijBnsRR0PjnKIYv9movMCpB0Jk/pTbIHu1n2z78VFeEleSnp7Op9rBg  
Kt/lUvkrCb9L6EXu2000GGOM7igZMxkyYdmT9hjwt2B8e56MmqcaHqEODmCm  
bZLfPaKAYawN+RVhDnCLTZU6UqUAHve015PZDhA6HrfdL0kBZ/6YHLHtc0D4  
Q4mEI1oK0JF3VFPVdQsvWUmvbI08Qv/yBwe60+L1gwZ+sQx5lHZ+qig954it  
jimiH4PkwUb1E+ZtcgQD6bxNBlkeL69EbF2VcULkhygZymM5MHtrGimYOCFz  
KtOZsUgO6kr0sb4+Tkhi89M3TJRdfm/i6pubTlA8nDl+11o01I25nx/wOIOD  
uk2E/assVL/fEfBXdcZQpyz/n/uyYB3/z2mfnTNSVQ63SCbJouLBI5cxNGcU  
HpSek5ORxfIJ1SeHuVzgitRtSFGBi9cTejplF3AKOU3JUX8R/00uGpWW7vg  
7PDrNVclGUAioZ4r2wU3HIzPPZ+RRvuC3+A3Flfw/ovIX3KVxt2pkMVnvK6Y  
+LXzvyZII+fdua2FJFcc/2Xa6yAgDe+uTGMrQ1cwyOdzc32WAlvpg7bGBFc8  
2hI5MhEihZ/5HR8uXXZFxULh9DcHKbzL7v3nW+oKr2fZehXaUrgX/Wk/3zNX

yF85mkXmIKVy+ba85vcwNA6Xve9URlAnjsH7LndwOa7qC5aJAnRw/wLZDE3  
DFxvPTyXJonf6mSpST03MJnbdIr7SCKPy6HIKM4NtpbcTL8FJBG7hdlqlOOG  
e/q2k77bJOG/MWD8TzER31FFz3aDJPd9wp7KDjc0Gp+PvvRRAhPdZVnbGd1h  
1Xx0WrNMAAt3ttdWz09yJ+8KhEblrEqh/0NzXIewOfcp8b1y6BBJuD7CF6bij  
gj2y3jpMAkEFoxLmVu5YzhrleXFMaVa0SQMJT3eMflui5rpJQCp2NwY02h0d  
e3LLtUwksPPMxpt1me6QEXRV5dSWwN8T7C2pN93hb/aVR0VVan2ugutoc8cL  
+ZcmgSISCDlgFFJM74FGvZkOPwYJ7AurHAjY5oHo+KN3+f+Q8KJmh5z6Pg9U  
WjwrZ/9Jwj7J9zM9Gh6Q4+8bvTxFQidVxyDXxAPss3/j5D+QEFp4u9jDwQN2  
b+xU6N6S0MUb7Po7zAOovp+r3kvCKeuRR63xHrh0qKb35nMSBC9p7k7JIXiM  
Q02zndCZWYYFaj2IOu0KoW8i9OVrxsbfPNAVY32g/BYJ3QoMt3f+9QDrAn1T  
1E0Swvy9mcbZPLGtIUHi3HVC/6zQEizhCSYjq2NLNEIXuLxXS80TPIovz3tl  
EfGc1k+zGHjC4loa54ZLhD70VDMf4ol4kpjMjSQShDiks7yDPSG8Rl0vjeh  
xzhjUSHaE1Mfgt91xZAg30Z452mBJ95ra32PPEdC798WloxKT5xcfvHFELC  
hLqYl2Ozj+iVNMorlgi9alFg8a0nuu+umRwNjfq5m3MPZjzhRdJKsg8m4pEe  
jsaueOLCgtfesBOE31NA3YyZAmTa+VYFEv6CONoubgo8r60NMwaQIDL69ceE  
CAUHWjW7g4+T0MdtblGpSMH2uq31634kiKbt3qJjQcFS/zYGBx8S+l9E+bK7  
UZDtvldNxpueM0yTT18HUOCTGsDI60X4tY1Fbp6lIPNmwwAuKuGPvHfheAoF  
MaI+0mQK4b+/c1wlj4Los96pbp6E/2eEBn05BamRY5HFHoRfbvxK130Kbv7c  
G/XXnfAf0/2d84yCx43RvMclFists3Z7RcGHY+49c24kDHzaWiM5SQGTN6dQ  
NMFn+EM4fv2gQLx+/qokwWIOb47/x0BFcsTXtklXwp+j1ZnESYV9GFmxluAz  
A0Xi1gJUVDy/GJ9jsBg7axy/HBVFCY/sYv7vNwz4NK1JhVVvsnYcwZGxQ6g9  
TMXbhkfvLxMs3qKWf9aRCnNH3s4HBA/+yV8z8KNicNjz+jzBZ1U3Ht0eQUX8  
puhlOWI9pGCf+rEEKr4aJoRciHiosmd7KY2KAdOvHR8JPvuVHHSihIp/5P5s

c2K/JLHcngN1VJC3uWT0ECx8skRKp4MKu8lbJRQiX3sf1yQZv6SiZGk0m43I  
J+/mli8Wn6mI80j81UrwDtsePfufoxD3VVdUlgcj/1ptvi9wYvcDH7uTtSNSH  
9dsXep+dXtgq/Ltek6gfXTzD41NKXqBzcO6UIuq9NsDBd07XC4oZiRMqviT8  
2rv3dJy1F5yzv02bEv3xtV5VJTvEC+uSUq7FRP8MTx6vrK4j4uU1bR4j+q9f  
4fSWpg4v7Bm8el2P6M+uswl+LS+9YNB3ub4phIQWrptifT+98JHH2rlljIQ7  
eq+vzyl5E3PDphkQ5+FCiXa6eL03Nt3eozicQuT/u+m87BNvdP3c/+xFGnHe  
NJ1MVIa9keCnd+gJcf6OD59i1vvljdmiz3L92STYMD2N8lD2gXX68ox8Pgky  
VO6g/HofXJY6J/inkoS3IrPmOxp8UfgwacOzYRKempq/6XviCzshgSTdERKq  
wxfcU4Z94ZxU9qKD+P4kdf84yfTLFz23ooR7xklQD1nP/q3ohydOnzn/zJBw  
pZ39zWi1Hw6cS7z66B8J9h7y7sUVx7BVvPdSkIQEXheEnlAu8ccQZ06ttwwUJ  
ilhOKw6JB8HeOjNdXEwSo4y5utKij1Hib77uNSSJ7siqgxUbQmB/zPWveIAU  
JmooF4cGQ0Hl17FQppPGytLu2SvdYXBpZl/1zZGGQZe6SmJxBCwz5dMl9sgg  
u8KBxl18BvkHH9gllMiA2ZRHZ/jqWdRqW/xjEzFm7a9gYMqUfj4guNZ2FVZ  
yFKq9fuVzmP00+P4TBY53LBY3fFJ8ALGBvnYVzXlwKnbnTsuFA06SsC6aagc  
crje+K3wx2Bz4fOfqmVyUFEShj+4ORbaiRTvq6+Juddm0cWeNQ7JjsrRL5jl  
kdWxOBT3Ow4FH4Pnp4j7iOd2LDJ+jlf2bSbRaEd5kKlbeazfj8BM6o1zd5w8  
+BkzFRs7E9E/8elEzR15sN6mOXztTMLfjIfppCF5MEvNklKeJmNy4Bmd44o8  
hNYW5lirL6LuObfgf7sUoNEb9jD4XgrUf79nyddQQPC32qjv11LhHZ9M/e2o  
gOZ5zdnWuDRsS2t3Lo5QQMyKcFXVwXSUVJf13c9VQMONjVPJDem4W2B/obFO  
Ab5dwoJHVC5h/76X06yDCpDk47e7UnEJ1K40+QtzCghx+u9DmlAGV6kzCBcz  
kaG1rzDweGEGvK3+WG4RIIObxXl1iCcTkuTGY99UyQgItk8Uzs2Ey6CyEDMx  
95v3rvvxcWdhrG1D3VcfMg6anTYsujiFEYUvMRnnyKiyVJPazJaN0drYOkoO  
GbKR/Sx00dl4xhl7f185Gco5HPvzl7PRqJyyZ6GZjEfy6UHCoTngYo43/jRI

hsXSdKHibA78wIx0/ZgkY7eCZt+h+RyMTCfnGEyRMRGYSW6xkAPVsV938gg+  
Na9uF/QjB8az6Y91vpCRN528peJPDkT5OM9kTZMx+V46TGwLDUtWUIYKs2RE  
dAUd3iVDQ6JSX5rXIhmHNj+JIMnR8APLV5oIZjPaVaqqQMPtfwXXtnwn4/rT  
VnpbZRRcpmISawhub93emKlJQ0DWS7W/S2Sw368T3GJKw80N20yyfpHxapnF  
bl85DdVVjn2TBBco00dKWtIga2tiorZMBrmW6bWhLQ3LA/yS7wi2q7RNiX0h  
IbqlP0ZshQzB+fKmbDcaGsxOPQkn+KsU3ZciDxp8Qvv/dRJ8tqxUu82LhoGX  
5UcDV8nQn/4TMOBDQ5eKXEQrwRzi5tc++NHQExWUsWONjDfU4hcLx2lYaQ8q  
pBJ8s3hl+V8AsX4eclkjwf8DXrCIFg==

"]]},

{RGBColor[0.880722, 0.611041, 0.142051], AbsoluteThickness[1.6], Opacity[1.],  
LineBox[CompressedData["

1:eJwV1nk8VPsbB3BJJVuKcMMViRQRssvHvtVlFmuWytJtFD0YIeaUSi4qO5PS  
VUopZRdXpRqKli1UiktRshNFafmd3x/ndV7v/77P83ye7znKe8KoQYICAgKd  
5PP/t87NO/9ViQIYCHTOpYILOlrofRcz/sjqsRhziR3rE4NZllmSy+zxi3+  
7TrjTo82wP38Z2PHWT8tFLZ33daas8Xij/L9bJY4kpqi9lkluOFhkM2056mS  
kNfzEvLz9UByz8y1oeBVmHSsC6y+7gWp+qFA6dUyKLzbR9is84Nq0v03B1iK  
eBAWnSVsFoBPC3MG8Q5KkOuTNskyDIS7oazTk9S1MBvcV+GnFQT5azuuDASr  
ILL2yOgW4b24lfq3W3K1GmiNGU6mhxhY+sgt7ayAOrZecJLY5BKCvwWn69XG  
1EEv51U7y++HJltdwbxBA7NDqVanCg+g2jvr1T6WFkJUnUejrjiQy9Je8sVn  
M1IaF/jrcpmlefJYL85BG0nsiwJt40wonY9zaEnVgcfp+nnHdBYGVtUUvgvW  
xZf3tl0r+eHIKhUyv/JWF3Ltv1T6l0fAbju1Yz9VD9euvqpf5BqBouPjgvPm  
+lj/BK0BryOwf37dLonVBvjWWOKd3x4JxWzWXHuyAYi92feEVrDRtuVuSq6A  
IXyHivIX07KhE+J9R3XMEHY/fajjtWzM9qStMW0whnmX2k77JA4KY3rLBYxN



IHO78MJfdRy4y2o6PiwxgR/fpXrjCAe1rk1RlDOmcL6w8VisXRSIhp8de1nm  
uF87ytb5HIWS9ydYq6fN8UIuYGhYMRq9i9ZINDC34f7Z2AHCIRqAgf2fTAsM  
TzL5lDPROOpX48OoAU6Lvbv895aDWBP6a6PlHPBg93hXFf0gKgnbb7KGltAe  
+fPZiqiDGMxrz35w0xKlqx+vFPnvIGy7J9vW3rSCWpDH/BXdGPSOGJyb+2KF  
X8K000tdYsD5ToS0bbXGQOsjg3xGDC7/ISbMrbZGsOT1h2n5MRD23GD5usoG  
wbmqy2YEYnF+b9iKklkbqH3P4efLxsl46mZPvL4tYk3PhV7VigUjxyZGt8oW  
RcoZKwY8YtHSsavyVKUdQoOSZb0LYxE4eOVI4IwdjlbzpzxqYvFjZsLFVM8e  
u2TeVDxtjoWmFDH2qcleN0Z6zExGYtGo0lh397M99ATNIvW+x8JXVzQpR9cB  
bcbZBpXLUih5K63qXDArmH1Voo6F2q7+2fWfHbA3ueeHpytXNxlqvOntziC  
LWbZo2nNxVRqtV9+uSNYXlnJ3r5cUNqe876XOeF2tMDhnye5G0mRC34+5YSW  
du0GeR4XR8f99Yt0nNERui8/t4CLCrGJZ25lzvAOGcrquMmFk8LWfM0pZ2wZ  
fvkp/B4XA5u4BxbrbEdNx7zj3UdcSDuLiJSXbseIk6Yno5uL696Uzn8mt+Pu  
9Za61gEubBmnL/tp78Csi1zT4CgXnCQ1a7HSHUhpriQxX+DidZMvd2/JX0gs  
eFjzV4YAZ+Sr/eKRv1DW9cdnngIBGfFiqfz1LuBNfhkxUSHgTpUqfpXngulo  
V6WPmgS+RDZxwjtdYPObVTy1hcDjFnPlZSKuMDQqv/TYgABjYnqswNYVDLUD  
FtMWBOp+t7xgBrji8QqflbAhILLycu22I65Y/yy4dl8Dgat63vFdt12hZrUI  
6q4E5m30GUVdrljgVkm30Ag4uEu4cuZdkazknGjnQeBTNF9+IT4Fnk8FJjt9  
CRgl5y3qp1BwLvHl76e7CCSe5QzdCKMgOsdXuzKAgHr9xkrHYgp003cmS+wj  
630qlCv7iILF6qb0xBACD/t7D334SIGCb8GZ/gMEghdnOh1RoYLuGNqqHU7g  
pvQBHRdQ8cK6SGtDJIGlavYyin5UcIKpgoIcsj+Gyj9GYqkQouX+uBNFoNBh  
4V1tLhXmxVfbfA4SmPV62ZRQQ8WgZNNgvhgCNiGln+gvqRBuGL9nyyWQxU3K  
Vjmhlpk6iW46QWDwVMDBKUKasi/qyvIPEdDPN/ev30zDBqfi5W8OE4gvk7U9  
uZ2G+XcXC17FEei4P73Rm0FDmw0l9tYRAuvaWyQ3JNignfdRM/EogfDBwq9f

Cmk4ZGPpbH6MAP/L4bcNDTQoZzr4dJNetcybn/60BvGk2oE98QT2yOkX+f+m  
gaK+I6iDdiWGRiQWlh0/QvmBOscJCjp+ilgwoUNpd0dQFGnqdr7XI086Eniv  
Rq+SvuCbZ8Hj0NHMEWE1k54K5awPyqKdyVi2t5004lxF9SroiLFYZdFCOi19  
47TAMzr6+GGMMtL9BUKv28bpyLsf6H2MtE5V7+08UTdcEzaIsyEd96C2gKhh  
hlWL3J1nyfM9e5WRaGTvhk7phrWZpJU+7Q9dGuSGDVb9u5Vjh36zo3ccdQND  
aCUzn6y3XkTZpOC8G0Re114XJy2hsKDERHdD2FbTg/vJfvlpvVyy7a0beJQZ  
g9tkP0u2lY6KfnfD1w99Vj/Jfv9ySXR+RtYddxiXprVJ/xtufo5Nc0f9g4KE  
EHJeE8dkj1mz3PGHD02aTc5zW/b03ytT3bEm4FEmi5x3T02h/o3H7rBPPVVi  
Q+ZB8vi+sA9D7ujz09+mTObFiqp1TXGJBxZe6B+flfN0eaxKKcXCazHeRg/Y  
bLle5UaRsCoP5LGIlz/CCJyf+Mf2ynMPpD4u6jkeSuDFLee4vgkPHE0bZi8h  
82zo3v7FRcMTuosnLYbJ/AuceN+v868n3qdmDiS+6HreVl+3y1P1F0Raz25  
m0Dgeob7hU5PUecVc5r9CTTfnW5ZKeWfVocTuRo+BNJnBWo+/+OF7piTRjI0  
Aip+SseqWN5476waso3cb/qmgaaxFG/EN5c9/MOKQML8ZcH1173hHEL5MEne  
ByMZm6OzP3rjKqE2etKUQGWTebQbn504Ym7Zkntll920Lj7GRrQ9kXCmLGpTI  
fRTK/XBLzg9znKzy4jkujD5fVw418o0OgTq6Z7kQ6b/nu9bTD7ua0zclf+ai  
5Nanl/E8P+T2HT7kPcbFXLjRwx0y/lj3xktxoj+LxqmQ9snlu5B02ut9Jnmf  
0v1Fq44s242DAcUJb305Yjs5sQsFA6DYvKrM24gLdfXcNrPqYKyVyhiyPhaL  
7vVjF0kaBuxtpj8tPIxB53lOuMHIUPSVL1TIycVgvdqwfscGFpJSZUs7iYN4  
uyTXVkstAkMSMZt6+qLxhCi3LFnERsXb5WpF9GgMVgad7GjnIP0xN+hEexS+  
zciPnXkSjZv1mvesXaLg0GpimFQYAxkhd4PmLg6yS3byZAu5kLNUtC4N4EDY  
Rc70+ewhLKK89Tj/hY2uhj+Z7YZx4M2m/92cxYZ2UIX9861HILjX6/6tLWxc  
oH6XHLA5io33M+XyuiKxyrZhrHHdMRxQs/erOBKJHJmukG9K8Tib3/C9SDsS  
hvqF/ZaixxHCd6dlDEXgtfu0v7dIAnZKSDX9PheBrAfTHQnzCdBT6LYP811A

oBSml7z/B/PCCoHFyhHQC14h59aXiLKVvXfrBsOhtCRTv7YlCca77sg7lIZD  
5Cpv52hLMiL651e+jw6HsOaIBqvpBKJKdAK77cKxbmFqXKTijEyF2LHi8uEw  
fxp907LsFISVBVMOT7AQOVkV9/lcCgqKf8gkNrFQP7FtjJ+QCl1+5dOrF1mI  
/6ZaXm6ZBocXm/MND7NQc0Fo6ERNgkZSdqxm+LPAaFVV+cswHXXKjNblVjY  
pKjkeaYkHwD32sZprGOB7XvvXeq6DKQ5XalmL2fBYm0B80BBBnInzL04k0zI  
Lvf73iGXiYLMX6rTnUyERXonqeZm4tbrn/VWfCYoT3+GKMpmQcls1abiG0xY  
usY6nj+ZBTVp9z39Z5kopxlrioplz49vVUsmQlt4vlygWPZMEl/mVAVw4RB  
jqTpv3PZWNg67fjiPxN3tqSxVDk5iN4zWv3DjwnqzHCB/lgO2mcixjfRmJDX  
3fbMeiIHTLtNsd+oTAwyM35Sp3LwNeWFQhPpqAkTT9ZsDvYd6j27h3Te8Anx  
kh85yLBgJJ6hMPGxTytaXZwHhzQbWQlX8n+6lbVjzWYeemtrRhfvYMJa9GGM  
hg4PWtaHJ9q3MyHmtKbISjCH18RLQpdI5zfxBT0MeEgO/cqwId3ll6rN3MYD  
tdtEKcGZCYn/qlXEXXj4+Z+/irgTE6/nlrsqUHjwEhnz7HVk4ryBH7GjxkN8  
Q0pBKWm9qqWdjh48PDy7JlxK2rPU41SCPw8cab0x0w5MqEwU12Xv5qGx+1cd  
g/SopsCnSwE890+pyjMjfehakVXDxh5+d3843W/PhP3wj7AX+3i4P+BZWUFa  
cgPl3LsQHvkdud4ft7oruPDx1AEeRNGz1oP0xcjvc7/DeKBd+xChQfp/5TYm  
aQ==

"}}},

{RGBColor[0.560181, 0.691569, 0.194885], AbsoluteThickness[1.6], Opacity[1.],  
LineBox[CompressedData["

1:eJwV0Wk81IseBvCRoyhb9jhFtmixN1MRj2TJPbJdmkYpasYyykwhdenYM7b5

l+V/KVeWKSelo5I6Ny04uXesSSklYZRliDqRqXTnvvh9ns/3zfPi+a0NjfZj

LqFQKMek9/+0ut1495YixYmSxmPb1WPjZCtR3PqOO+B08G2kPF1vJRzUty29

xJ1yyjzix+j+aIBHZd3id053J53H5swHlVaQfaf3NparBIt/xitlKQKPMtu9

nvBVoaCmtlR/1BlZL05dec9Sw6eP4V+d612gfv/9YQ1NLSgZq2pNO7jDmPfo

5RHuatwaEHU/m/bC2Nd5apqHPhhzqx72Znojkkbt2cE3glpi6YahXB/oXfG6  
PMIyBN1ljp+q5Ycq/h8hqpqm2Mt00KmlBKCeUfA8grsJ2R2F5c/cGdApsJT7  
vM8CfT+Hhd4WMXCqQ2ib5GGJLW9MXVb/GgT9i0kebXwr7HrqaHXz6j6MqDUI  
hlg2OCJ7m3dMHlYoL0YHlTWpyLlscJObFoLVhdz5p1lU0PYwqDJNlei0fpBX  
TKHB9ZnDl7rFEFixGY3GYhqEFu0HsmJD8dcAoWvfvBXsj/H2xXsPIbH5e28Y  
dzuGD5kwRIuHUTuczWc3Q7WvSndRjSm3sjoKjdzHFFhYtEyEMEEQHvfw3FC  
lLpwcVkPEynBDfsiG4CSh5KTMSUsuL760GlwewdUuqA9qRyONxPU0vnPO3Dt  
7xqLavbhiJMksjs3u8B9q+aTe6xwXFqKJ8g/UNcy/XQ8nvhkKebOffd2okU  
SlODJDQCbb0Hb+bedENUI9P09ElkDosuJx/+5IZ6TaPuykeR+PZp2tve1h3+  
BndpwneR2KieKB674Y7FhvXJq6zYyPMtNtl5wwPfYryJufts+HY+ISW/e2Lv  
mklts64o9LXuSAir3Y2KqQsLn0ajijuYc5ed2I0/1QS6awePQkupRr3MxBsp  
OQqSGslRBPqp1zy/4A3qa305A0toRE7PiitcfbBpHbtyWWk0xuKb9NTsfFEp  
66cFGgei3EMnZ1T9UZWgGNe2yMFAg8DumjAQZVFThv7cY2D9VDz6b51g6L2v  
OppeFotYB89YwZJDeFbXGqBQfgLm64o7HepZcJcc3/jbxEm8MhH7ajREQRb9  
rQx9ZwJeXIw7Rr10FH5Gpu02MadhYjpu12vGRcr8Uh9nmyS8lit23WR6HG81  
KmlfrZPRkVjnXCSTC50AqKvPNVIgusnM6X0ah6LkqtLrYylY+KQnLumIwx8W  
81dGcyo82rfReIJTeEOjRHDS01BYG0RqCxlw5tjvxfdkh7y3jtvfzp9Gl9t4  
v418Bvqb13Ce0pJw/XVmzNy1DFgyb7g/2ZwMJnekxHLvGZT7STRGDFMw1pBy  
LHT2DNRcm8UtRqkY0ePNHs/LRJFWP3tBPw0x17/tM13LA8108NZ5RTp69lPD  
qit56AucPcBYnoGrsXKj59dnoeDP2d6MLxmovpTq9d+KLBxWx6zc8Bmc1Fko  
j1bPhi1LRSdgMBOvdF/Kr8/Mhr5cvt2dNh4UVM8+3TKTjeW/kUGTbVlwaPmF  
JwnKgfzGCXNuazYsw0cs5h7mw0jrjNTyGznYVj8eqa2Xi+1d8fdifs9Fevvr  
H1XxuYj5cCvpY2kezgkif0F7Lu5PO4qbMvhYvp2nMKabh7QF47o6ZwJmg4Gf

H0TloaH8p/fZDQQuzLHuLNbnIbLd2HA37Sy2OuSbWy7hY8NqfXpj7VmkFKn8  
J96Nj9j9D4f4Rucw2Wk2PyztdTKo4Byp0AeTl+F71IR8aCsES3p18iG80ym0  
liUQHcPgGRfn40CNb7XAkIBv13f2au0C3A1JFO4FAWeff+y6mFOAF/1T2iuD  
CNT5b924QrEQHzzdckJApajTxQoqYU4rZOrYE0QoBap2v9rvhDK/uOildUE  
Gq0JrnFcEZ4blNH0HxHw+zReYScuwozLcY/GPgJ6No7dLtNFCDIfrjF4QUDE  
Offdb6YINtbJMmlSn5jeRuf+VQS6zP5Uz5fSHcazlWq/FWFQfXzoeT+Bd4Ob  
4tcpkXiV5qg0NUDgVDvXS9eCRA9pZqciIuCy4vEpcysS+ccVRRypFT11q7fY  
kNAe5mX0SF3W2rRkD5XEA7/gysJRAi1N6nfyHUkMJrc66L0noHy33IDJm8Tn  
lexZowkCffMKPj/7khjqIghPk/oiNThxgz+JUd7mklGpbW8tbfFrDwneAJQv  
TxKgX9+Tm3GAR07HJLr5FAHD6Zo/CkNInKl1FvKkntxIGas6RGLH2nGLCaP  
X6ne0RxGwmfpQveVaQLu49+ieyJI7H4XprziAwFVM9/SITaJULrQkS11P0sg  
nDkidb5RajvUIYKF+R/RJAw74+I3zBD4H23FTAI=

"]]]]},

AspectRatio->0.6180339887498948,

Axes->{True, True},

AxesLabel->{None, None},

AxesOrigin->{0, 0},

DisplayFunction->Identity,

Frame->{{False, False}, {False, False}},

FrameLabel->{{None, None}, {None, None}},

FrameTicks->{{Automatic, Automatic}, {Automatic, Automatic}},

GridLines->{None, None},

GridLinesStyle->Directive[GrayLevel[0.5, 0.4]],

Method->{},

PlotRange->{{0, 1500.}, {0, 1043.905439}},

PlotRangeClipping->True,

PlotRangePadding->{{Scaled[0.02], Scaled[0.02]}, {Scaled[0.02], Scaled[0.05]}},

Ticks->{Automatic, Automatic}] \) \!\(\\*

GraphicsBox[{{},

{RGBColor[0.368417, 0.506779, 0.709798], PointSize[0.7], AbsoluteThickness[1.6],  
EdgeForm[{{GrayLevel[0], Opacity[0.3]}]},

{RGBColor[0.368417, 0.506779, 0.709798], PointSize[0.7], AbsoluteThickness[1.6],  
EdgeForm[{{GrayLevel[0], Opacity[0.3]}]}, PointBox[NCache[{{Scaled[{{Rational[1, 2],  
Rational[1, 2]}]}, {Scaled[{{0.5, 0.5}}]}]}]}},

AspectRatio->Full,

BaselinePosition->(Scaled[0.1] -> Baseline),

ImagePadding->Automatic,

ImageSize->{10, 10},

PlotRangePadding->None] \) blood

\!\(\\*

GraphicsBox[{{},

{RGBColor[0.880722, 0.611041, 0.142051], PointSize[0.7], AbsoluteThickness[1.6],  
EdgeForm[{{GrayLevel[0], Opacity[0.3]}]},

{RGBColor[0.880722, 0.611041, 0.142051], PointSize[0.7], AbsoluteThickness[1.6],  
EdgeForm[{{GrayLevel[0], Opacity[0.3]}]}, PointBox[NCache[{{Scaled[{{Rational[1, 2],  
Rational[1, 2]}]}, {Scaled[{{0.5, 0.5}}]}]}]}},

AspectRatio->Full,

BaselinePosition->(Scaled[0.1] -> Baseline),

ImagePadding->Automatic,

```
ImageSize->{10, 10},
PlotRangePadding->None])      liver

\!\(\*

GraphicsBox[{{},

{RGBColor[0.560181, 0.691569, 0.194885], PointSize[0.7], AbsoluteThickness[1.6],
EdgeForm[{{GrayLevel[0], Opacity[0.3]}}],

{RGBColor[0.560181, 0.691569, 0.194885], PointSize[0.7], AbsoluteThickness[1.6],
EdgeForm[{{GrayLevel[0], Opacity[0.3]}}], PointBox[NCache[{Scaled[{Rational[1, 2],
Rational[1, 2]}]}, {Scaled[{0.5, 0.5}]}]}]}]},

AspectRatio->Full,

BaselinePosition->(Scaled[0.1] -> Baseline),

ImagePadding->Automatic,

ImageSize->{10, 10},

PlotRangePadding->None])      gi
```

```
iteratefit[k1i,k2i,k3i,k4i,k5i]:=
Module[{y},
Clear[firstfit,secondfit,thirdfit];
```

firstfit=

```
NonlinearModelFit[newdataforfit,{newmodel[k1i,k2i,k3,k4,k5][i,t]},{k3,k3i},{k4,k4i},k5,k5i},{i,t};
```

secondfit=

```
NonlinearModelFit[newdataforfit,{newmodel[k1,k2,Replace[k3,firstfit["BestFitParameters"][[1]]],Replace[k4,firstfit["BestFitParameters"][[2]]],Replace[k5,firstfit["BestFitParameters"][[3]]][i,t]},{k1,k1i},{k2,k2i},{i,t};
```

thirdfit=

```
NonlinearModelFit[newdataforfit,{newmodel[k1,k2,k3,k4,k5,k6][i,t]},{k1,Replace[k1,secondfit["BestFitParameters"][[1]]],k2,Replace[k2,secondfit["BestFitParameters"][[2]]],k3,Replace[k3,firstfit["BestFitParameters"][[1]]],k4,Replace[k4,firstfit["BestFitParameters"][[2]]],k5,Replace[k5,firstfit["BestFitParameters"][[3]]]},{i,t};
```

y=thirdfit

]

\(\(\\*

GraphicsBox[{{}, {},

```
{RGBColor[0.368417, 0.506779, 0.709798], PointSize[0.019444444444444445`], AbsoluteThickness[1.6], PointBox[{{30., 260.829406}, {70., 78.790912}, {90., 57.919418}, {110., 49.641256}, {130., 45.226464}, {150., 41.34165}, {170., 38.293797}, {210., 39.243422}, {270., 38.081103}, {450., 38.31765}, {750., 38.215218}, {1050., 37.337411}, {1500., 35.895027}}]},
```

```
{RGBColor[0.880722, 0.611041, 0.142051], PointSize[0.019444444444444445`], AbsoluteThickness[1.6], PointBox[{{30., 177.898123}, {70., 394.08627}, {90., 432.542377}, {110., 456.040953}, {130., 467.274313}, {150., 473.583266}, {170., 476.059768}, {210., 476.239037}, {270., 468.65291}, {450., 431.878995}, {750., 360.561313}, {1050., 308.513019}, {1500., 246.957162}}]},
```

```
{RGBColor[0.560181, 0.691569, 0.194885], PointSize[0.019444444444444445`], AbsoluteThickness[1.6], PointBox[{{30., 128.889238}, {70., 255.472349}, {90., 277.571582}, {110., 301.610403}, {130., 332.35228}, {150., 375.879715}, {170., 413.056836}, {210., 472.356497}, {270., 525.516445}, {450., 694.361139}, {750., 904.494491}, {1050., 983.637808}, {1500., 1043.905439}}]}, {}, {}, {}},
```

AspectRatio->0.6180339887498948,



```

Axes->{True, True},
AxesLabel->{None, None},
AxesOrigin->{0, 0},
DisplayFunction->Identity,
Frame->{{False, False}, {False, False}},
FrameLabel->{{None, None}, {None, None}},
FrameTicks->{{Automatic, Automatic}, {Automatic, Automatic}},
GridLines->{None, None},
GridLinesStyle->Directive[GrayLevel[0.5, 0.4]],
Method->{},
PlotRange->{{0, 1500.}, {0, 1043.905439}},
PlotRangeClipping->True,
PlotRangePadding->{{Scaled[0.02], Scaled[0.02]}, {Scaled[0.02], Scaled[0.05]}},
Ticks->{Automatic, Automatic}\) \!\(\*
GraphicsBox[{{,
{RGBColor[0.368417, 0.506779, 0.709798], PointSize[0.7], AbsoluteThickness[1.6],
EdgeForm[{{GrayLevel[0], Opacity[0.3]}]},
{RGBColor[0.368417, 0.506779, 0.709798], PointSize[0.7], AbsoluteThickness[1.6],
EdgeForm[{{GrayLevel[0], Opacity[0.3]}]}, PointBox[NCache[{{Scaled[{{Rational[1, 2],
Rational[1, 2]}]}, {Scaled[{{0.5, 0.5}}]}]}]}]},
AspectRatio->Full,
BaselinePosition->(Scaled[0.1] -> Baseline),
ImagePadding->Automatic,
ImageSize->{10, 10},
PlotRangePadding->None]\)      blood

```

\\(\\*

GraphicsBox[{{},

{RGBColor[0.880722, 0.611041, 0.142051], PointSize[0.7], AbsoluteThickness[1.6],  
EdgeForm[{GrayLevel[0], Opacity[0.3]}]},

{RGBColor[0.880722, 0.611041, 0.142051], PointSize[0.7], AbsoluteThickness[1.6],  
EdgeForm[{GrayLevel[0], Opacity[0.3]}]}, PointBox[NCache[{Scaled[{Rational[1, 2],  
Rational[1, 2]}]}, {Scaled[{0.5, 0.5}]}]}]}],

AspectRatio->Full,

BaselinePosition->(Scaled[0.1] -> Baseline),

ImagePadding->Automatic,

ImageSize->{10, 10},

PlotRangePadding->None]) liver

\\(\\*

GraphicsBox[{{},

{RGBColor[0.560181, 0.691569, 0.194885], PointSize[0.7], AbsoluteThickness[1.6],  
EdgeForm[{GrayLevel[0], Opacity[0.3]}]},

{RGBColor[0.560181, 0.691569, 0.194885], PointSize[0.7], AbsoluteThickness[1.6],  
EdgeForm[{GrayLevel[0], Opacity[0.3]}]}, PointBox[NCache[{Scaled[{Rational[1, 2],  
Rational[1, 2]}]}, {Scaled[{0.5, 0.5}]}]}]}],

AspectRatio->Full,

BaselinePosition->(Scaled[0.1] -> Baseline),

ImagePadding->Automatic,

ImageSize->{10, 10},

PlotRangePadding->None]) gi

```
(* first mouse _____  
-----*)
```

```
vn=readTac["C:\\Users\\exx\\Downloads\\TimeM4, liver 2.46075, GI 0.62975, ID  
3626.csv"];
```

```
Lv=2.46075;
```

```
Gv=0.62975;
```

```
model= mouseModel[Lv,Gv,3626,28]
```

```
ParametricFunction[\\(\(\*
```

```
GraphicsBox[RasterBox[{{179, 179, 179, 179, 179, 179, 179, 179, 179, 179, 179,  
179}, {179, 180, 180, 180, 179, 179, 179, 179, 179, 179, 179, 179}, {179, 179, 180,  
179, 179, 248, 248, 178, 179, 179, 179, 179}, {179, 179, 180, 179, 179, 253, 248,  
179, 179, 179, 179, 179}, {179, 179, 179, 179, 179, 248, 248, 179, 179, 179, 179,  
179}, {179, 179, 248, 248, 248, 248, 248, 248, 248, 248, 179, 179}, {179, 179, 248,  
248, 248, 248, 248, 248, 248, 179, 179}, {179, 179, 179, 179, 179, 248, 248,  
179, 179, 179, 179, 179}, {179, 180, 179, 179, 179, 252, 248, 179, 178, 179, 180,  
179}, {179, 180, 180, 179, 179, 248, 248, 179, 180, 180, 180, 179}, {179, 179, 179,  
179, 179, 179, 179, 179, 179, 179, 179}, {179, 179, 179, 179, 179, 179,  
179, 179, 179, 179, 179}}, {{0, 0}, {12, 12}}, {0, 255},
```

```
ColorFunction->GrayLevel],
```

```
BaselinePosition->Bottom,
```

```
ImageSize->{12, 12},
```

```
PlotRange->{{0, 12}, {0, 12}}] \\(\(\*
```

```
GraphicsBox[{{}, {}],
```

```
{GrayLevel[0.55], AbsoluteThickness[1.5], Opacity[1.],  
LineBox[{{9.09090909090909*^-8, 9.090909090884856*^-8},
```

{0.0874367476365131, 0.08197166587636243}, {0.18222810297558026`,  
0.1358255024317191}, {0.27073779576926765`, 0.13315455086535802`},  
{0.3575112797365835, 0.08143316377978886}, {0.4516394623155443, -  
0.007347854733426912}, {0.5394859823491253, -0.08816932746972758},  
{0.6346872009943513, -0.13787329990112937`}, {0.7281522108132057, -  
0.12816574147938434`}, {0.8153355580866803, -0.07001063326902106},  
{0.9098736039718, 0.02121659675083076}, {0.9999999090909091,  
0.10024804094746914`}}},

{GrayLevel[0.55], AbsoluteThickness[1.5], Opacity[1.],  
LineBox[{{9.09090909090909\*^-8, 9.090909090880112\*^-8},  
{0.0874367476365131, 0.08090369567458766}, {0.18222810297558026`,  
0.12746559200130417`}, {0.27073779576926765`, 0.1116266937044405},  
{0.3575112797365835, 0.046963725126600256`}, {0.4516394623155443, -  
0.04509050859182233}, {0.5394859823491253, -0.11115559892361665`},  
{0.6346872009943513, -0.12642564594664163`}, {0.7281522108132057, -  
0.07740196037964171}, {0.8153355580866803, 0.004179083230780074},  
{0.9098736039718, 0.08937493944143977}, {0.9999999090909091,  
0.12834702174618903`}}},

{GrayLevel[0.55], AbsoluteThickness[1.5], Opacity[1.],  
LineBox[{{9.09090909090909\*^-8, 9.090909090875369\*^-8},  
{0.0874367476365131, 0.07984396759533968}, {0.18222810297558026`,  
0.11939549826670079`}, {0.27073779576926765`, 0.09184904274707059},  
{0.3575112797365835, 0.017913117173780694`}, {0.4516394623155443, -  
0.07109962300031061}, {0.5394859823491253, -0.11717052830989395`},  
{0.6346872009943513, -0.09879571259704382}, {0.7281522108132057, -  
0.022693471356141894`}, {0.8153355580866803, 0.06128703302641453},  
{0.9098736039718, 0.11605625481609519`}, {0.9999999090909091,  
0.10415981267620744`}}},

{GrayLevel[0.55], AbsoluteThickness[1.5], Opacity[1.],  
LineBox[{{9.09090909090909\*^-8, 9.090909090870287\*^-8},  
{0.0874367476365131, 0.07879243663407876}, {0.18222810297558026`,  
0.1116081822210312}, {0.27073779576926765`, 0.07372482040530459},  
{0.3575112797365835, -0.006267252216927747}, {0.4516394623155443, -  
0.08743897872291118}, {0.5394859823491253, -0.11109134853087661},  
{0.6346872009943513, -0.06371549528296311}, {0.7281522108132057,  
0.02544576624054603}, {0.8153355580866803, 0.09464282937855747},  
{0.9098736039718, 0.10731931496853601`}, {0.9999999090909091,  
0.0516787429232188}}},

{GrayLevel[0.55], AbsoluteThickness[1.5], Opacity[1.],  
LineBox[{{9.09090909090909\*^-8, 9.090909090865543\*^-8},  
{0.0874367476365131, 0.07774905743802465}, {0.18222810297558026`,  
0.10409673959866513}, {0.27073779576926765`, 0.05716133039337165},

{0.3575112797365835, -0.026084496726167965`}, {0.4516394623155443, -0.09591154799603378}, {0.5394859823491253, -0.09685594593277226}, {0.6346872009943513, -0.02730376120671303}, {0.7281522108132057, 0.061646715198529656`}, {0.8153355580866803, 0.1046634148537508}, {0.9098736039718, 0.07509702498429204}, {0.9999999090909091, -0.006536873471333553}}}],

{GrayLevel[0.55], AbsoluteThickness[1.5], Opacity[1.],  
LineBox[{{9.09090909090909\*^-8, 9.0909090908608\*^-8},  
{0.0874367476365131, 0.07671378556951527}, {0.18222810297558026`,  
0.09685439581479163}, {0.27073779576926765`, 0.042069810325321415`},  
{0.3575112797365835, -0.042006785469922474`}, {0.4516394623155443, -0.09808544986431629}, {0.5394859823491253, -0.07760167026270944},  
{0.6346872009943513, 0.0063643674428021085`}, {0.7281522108132057, 0.08405712128907425}, {0.8153355580866803, 0.09555213349985489},  
{0.9098736039718, 0.03202960165577907}, {0.9999999090909091, -0.054402034659985464`}}}],

AspectRatio->1,

Axes->{False, False},

AxesLabel->{None, None},

AxesOrigin->{0, 0},

Background->GrayLevel[0.93],

BaseStyle->{FontFamily -> "Arial"},

DisplayFunction->Identity,

Frame->{{True, True}, {True, True}},

FrameLabel->{{None, None}, {None, None}},

FrameStyle->Directive[Thickness[Tiny], GrayLevel[0.7]],

FrameTicks->{{None, None}, {None, None}},

GridLines->{None, None},

GridLinesStyle->Directive[GrayLevel[0.5, 0.4]],

ImageSize->{Automatic, 28.4375},

LabelStyle->{FontFamily -> "Arial"},  
 Method->{"ScalingFunctions" -> None},  
 PlotRange->{All, All},  
 PlotRangeClipping->True,  
 PlotRangePadding->{Automatic, Automatic},  
 Ticks->{Automatic, Automatic}] \) Expression: {Bl,Li,G}  
 Parameters: {k1,k2,k3,k4,k5,k6}

]

Manipulate[Show[ListPlot[vn[[1]],PlotRange-> Full,PlotLegends->{"blood", "liver", "gi"}],Plot[Through[model[k1,k2,k3,k4,k5,k6][t]],{t,0,1500},PlotRange-> Full,PlotLegends->{"Blood", "Liver", "Gi"}]],{k1,0.001`0.2`},{k2,0.0001`0.1`},{k3,1.`\*^-6,0.01`},{k4,0.001`0.2`},{k5,0.0001`0.01`},{k6,0.001,0.01}]

Manipulate[Show[ListPlot[vn[[1]], PlotRange -> Full,  
     PlotLegends -> {"blood", "liver", "gi"}],  
     Plot[Through[model[k1, k2, k3, k4, k5, k6][t]], {t, 0, 1500},  
     PlotRange -> Full, PlotLegends -> {"Blood", "Liver", "Gi"}]],  
     {k1, 0.001, 0.2}, {k2, 0.0001, 0.1}, {k3, 1.\*^-6, 0.01}, {k4, 0.001, 0.2},  
     {k5, 0.0001, 0.01}, {k6, 0.001, 0.01}]

Part::partd: Part specification vn[[1]] is longer than depth of object. >>

Part::partd: Part specification vn[[1]] is longer than depth of object. >>

ListPlot::lpln: vn[[1]] is not a list of numbers or pairs of numbers. >>

ListPlot::lpln: vn[[1]] is not a list of numbers or pairs of numbers. >>

ListPlot::lpln: vn[[1]] is not a list of numbers or pairs of numbers. >>

General::stop: Further output of ListPlot::lpln will be suppressed during this calculation. >>

Show::gcomb: Could not combine the graphics objects in  
Show[ListPlot[vn[[1]],PlotRange->Full,PlotLegends->{blood,liver,gi}],\!\(\^\*

GraphicsBox[{},

AspectRatio->0.6180339887498948,

Axes->{True, True},

AxesLabel->{None, None},

AxesOrigin->{0, 0},

DisplayFunction->Identity,

Frame->{{False, False}, {False, False}},

FrameLabel->{{None, None}, {None, None}},

FrameTicks->{{Automatic, Automatic}, {Automatic, Automatic}},

GridLines->{None, None},

GridLinesStyle->Directive[GrayLevel[0.5, 0.4]],

Method->{"DefaultBoundaryStyle" -> Automatic, "ScalingFunctions" -> None},

PlotRange->{{0, 1500}, {0., 0.}},

PlotRangeClipping->True,

PlotRangePadding->{{Scaled[0.02], Scaled[0.02]}, {Scaled[0.05], Scaled[0.05]}}

Ticks->{Automatic, Automatic}\)]. >>

Part::partd: Part specification vn[[1]] is longer than depth of object. >>

Part::partd: Part specification vn[[1]] is longer than depth of object. >>

ListPlot::lpm: vn[[1]] is not a list of numbers or pairs of numbers. >>

ListPlot::lpm: vn[[1]] is not a list of numbers or pairs of numbers. >>

ListPlot::lpm: vn[[1]] is not a list of numbers or pairs of numbers. >>

General::stop: Further output of ListPlot::lpm will be suppressed during this calculation. >>

Show::gcomb: Could not combine the graphics objects in  
Show[ListPlot[vn[[1]],PlotRange->Full,PlotLegends->{blood,liver,gi}],\!\(\\*

GraphicsBox[{}],

AspectRatio->0.6180339887498948,

Axes->{True, True},

AxesLabel->{None, None},

AxesOrigin->{0, 0},

DisplayFunction->Identity,

Frame->{{False, False}, {False, False}},

FrameLabel->{{None, None}, {None, None}},

FrameTicks->{{Automatic, Automatic}, {Automatic, Automatic}},

GridLines->{None, None},

GridLinesStyle->Directive[GrayLevel[0.5, 0.4]],

Method->{"DefaultBoundaryStyle" -> Automatic, "ScalingFunctions" -> None},

PlotRange->{{0, 1500}, {0., 0.}},

PlotRangeClipping->True,

PlotRangePadding->{{Scaled[0.02], Scaled[0.02]}, {Scaled[0.05], Scaled[0.05]}},

Ticks->{Automatic, Automatic}\]. >>

Part::partd: Part specification vn[[1]] is longer than depth of object. >>



Part::partd: Part specification vn[[1]] is longer than depth of object. >>

ListPlot::lpln: vn[[1]] is not a list of numbers or pairs of numbers. >>

ListPlot::lpln: vn[[1]] is not a list of numbers or pairs of numbers. >>

ListPlot::lpln: vn[[1]] is not a list of numbers or pairs of numbers. >>

General::stop: Further output of ListPlot::lpln will be suppressed during this calculation. >>

Show::gcomb: Could not combine the graphics objects in  
Show[ListPlot[vn[[1]],PlotRange->Full,PlotLegends->{blood,liver,gi}],\{\(\\*

GraphicsBox[{}],

AspectRatio->0.6180339887498948,

Axes->{True, True},

AxesLabel->{None, None},

AxesOrigin->{0, 0},

DisplayFunction->Identity,

Frame->{{False, False}, {False, False}},

FrameLabel->{{None, None}, {None, None}},

FrameTicks->{{Automatic, Automatic}, {Automatic, Automatic}},

GridLines->{None, None},

GridLinesStyle->Directive[GrayLevel[0.5, 0.4]],

Method->{"DefaultBoundaryStyle" -> Automatic, "ScalingFunctions" -> None},

PlotRange->{{0, 1500}, {0., 0}},

PlotRangeClipping->True,

PlotRangePadding->{{Scaled[0.02], Scaled[0.02]}, {Scaled[0.05], Scaled[0.05]}},

Ticks->{Automatic, Automatic}\}\]. >>

```
Clear[newmodel]
```

```
newmodel[k1_,k2_,k3_,k4_,k5_,k6_][i_,t_]:=Through[model[k1,k2,k3,k4,k5,k6][t],List][[i]] /;And@@NumericQ/@{k1,k2,k3,k4,k5,k6,i,t};
```

```
fit2=
```

```
NonlinearModelFit[vn[[2]],{newmodel[k1,k2,k3,k4,k5,k6][i,t],{k1>=0},{k2>0},{k3>=0},{k4>=0},{k5>=0},{k6>=0}},{k1,0.0076`},{k2,0.0001`},{k3,0.00106`},{k4,0.001`},{k5,0.006`},{k6,0.001}},{i,t}]
```

NonlinearModelFit::eit: The algorithm does not converge to the tolerance of  $4.806217383937354 \times 10^{-6}$  in 500 iterations. The best estimated solution, with feasibility residual, KKT residual, or complementary residual of  $\{2.55038 \times 10^{-11}, 0.000893021, 1.287 \times 10^{-11}\}$ , is returned. >>

```
FittedModel[newmodel[0.019764,1.88835*10^-12,<<22>>,<<24>>,0.0236587,1.22098*10^-12][i,t]]
```

```
{fit2["AdjustedRSquared"],fit2["AIC"]}
```

FittedModel::constr: The property values {AIC} assume an unconstrained model. The results for these properties may not be valid, particularly if the fitted parameters are near a constraint boundary. >>

```
{0.938399,524.976}
```

```
fit2["ParameterTable"]
```

FittedModel::constr: The property values {ParameterTable} assume an unconstrained model. The results for these properties may not be valid, particularly if the fitted parameters are near a constraint boundary. >>

|    | Estimate                  | Standard Error | t-Statistic              | P-Value      |
|----|---------------------------|----------------|--------------------------|--------------|
| k1 | 0.019764                  | 0.00497657     | 3.97141                  | 0.00036487   |
| k2 | $1.88835 \times 10^{-12}$ | 0.00130972     | $1.4418 \times 10^{-91}$ |              |
| k3 | 0.00177517                | 0.000366662    | 4.84144                  | 0.0000294103 |
| k4 | $1.42402 \times 10^{-11}$ | 0.000847296    | $1.68066 \times 10^{-8}$ | 1            |
| k5 | 0.0236587                 | 0.0069015      | 3.42806                  | 0.00164818   |
| k6 | $1.22098 \times 10^{-12}$ | 0.000332278    | $3.67456 \times 10^{-9}$ | 1            |

```
Show[ListPlot[vn[[1]],PlotRange->Full,PlotLegends-  
>{"blood","liver","gi"}],Plot[{fit2[1,t],fit2[2,t],fit2[3,t]},{t,0,1501},PlotRange->Full]  
]
```

```
\!\(\*
```

```
GraphicsBox[{{}, {},
```

```
{RGBColor[0.368417, 0.506779, 0.709798], PointSize[0.019444444444444445`],  
AbsoluteThickness[1.6], PointBox[{{10., 50.71235747}, {30., 553.3724349}, {50.,  
167.698095}, {70., 90.64196516}, {90., 62.60314356}, {110., 52.02094616}, {150.,  
42.31892121}, {210., 34.63139113}, {270., 31.31339177}, {450., 22.28795711},  
{750., 15.59265278}, {1050., 12.71073057}, {1500.05705, 10.34464511}}]},
```

```
{RGBColor[0.880722, 0.611041, 0.142051], PointSize[0.019444444444444445`],  
AbsoluteThickness[1.6], PointBox[{{10., 12.89144356}, {30., 174.9766167}, {50.,  
345.9979221}, {70., 442.3824634}, {90., 492.1056215}, {110., 522.9724029}, {150.,  
533.0282187}, {210., 504.1053595}, {270., 455.5648745}, {450., 342.7931439},  
{750., 239.9658938}, {1050., 188.5473103}, {1500.05705, 144.2699607}}]},
```

```
{RGBColor[0.560181, 0.691569, 0.194885], PointSize[0.019444444444444445`],  
AbsoluteThickness[1.6], PointBox[{{10., 8.807153459}, {30., 108.7803321}, {50.,  
160.9091465}, {70., 168.5686421}, {90., 175.4756868}, {110., 203.9224919}, {150.,  
318.0953844}, {210., 585.4084712}, {270., 878.9270461}, {450., 1492.959162},  
{750., 2052.769082}, {1050., 2316.159295}, {1500.05705, 2470.453224}}]}, {}, {}},  
{}, {}},
```

```
{RGBColor[0.368417, 0.506779, 0.709798], AbsoluteThickness[1.6], Opacity[1.],  
LineBox[CompressedData["
```

```
1:e]wUVV3c81e8Xl71]kpfCspO9PZ/jcu+1Z/bI3ntv916KFBmlSKhEERUqo1RK
```

```
UdKXhIqoZGUlpOR3f399Xu/X83n00c+Z7yPqGWbtQ0tDQ1PKQkPz/6/Oz6HV
```

```
CC4a7K1A4s/krEvw5fz0vcXYMUzhgFV3amwRpHUIJR92J/YElvMy/sRF+Ed5P
```

```
aZ44F7uDhbz1+cZ6phDONry+ty+QFnQ0JLMu3yyAu5GR6pP8jKBVZGyc2pMP
```

```
m2uvDZ]jOWCIfOBX]Hoe5Di2TFcWcAPNOQZ781+5UN7CeZstkAcunN+EsXM5
```

8CKh5fgnfj4Qmhf6FrCYDR8/cf7EVg5AkaKSyVrDGfiu6f2w6rUAXM09vPQ4  
MwvYtjl1o2OFQVrI/fBpx9Nw0Mmb5rPZYfiaxSRuYXsKDoyNTIYUiMACcVtk  
ySUDpHWVbjIFioHx1tbrszkUUPoxythmewQkGrNTzzwgg/bVTP9QPXFwE3lg  
6PSdBGY7o7If+SXgWO+7i+7vUsGuLjMni14Skrhe+T3zTYGTrkrL2iuSEPHh  
WH4YdzJEPmlsuP5aGhbmEkPe5idAYogSr12jDPSwZJbx+8dDuvBYDEu5LGQR  
feZYMYmDiylKmuGxx+DLcqj7G80YKDs2VnLEUx4cf1xbrcFFQ9VY5t9Bs+Pw  
9meK2iu7KBgtW/pSVqAARAZnUkNZBExsvMiLZ1aEzU2fs+f6wmHavFjPOLUR  
xmob2do4wmHpn/4NhkAl4P131n0AQmDNTuDEly9KMHqJJ1x7MQg265foW2yV  
IWuwakGsOhBoThb7BuupQF7/MdJVQ3+gfxR6gPBIBSbury1/PeYHLFwGXYeP  
qcIMiTRFL+ILPE+XpD/wq0H8nAB3lpQ38B14OXInVw1K5LJk3W9QCis+Oxp  
enXAWahSel09QfywwQ/NFXU49z6UbbTNHaTiBMr2+Wra7JhkP+faSTj2fsn8  
x2cNSL3+x0c41Q3U0orvVbzWBPaeSFatLmfQGgr1SNTVgpmGrGfPM5wAO27A  
c6JRC8T5shRpLR3B8MtSFFO5NhzgiQjb4bIHU/WX4p08OuDFuOCTSGcHVueL  
P7Zm64CRSNw7eTpbcmIM1ENjdSHVQrqR7qgNyGfKlClu6EJJ0oerQ8rWQPue  
m+FXDIJOLcvITHMrqHUB60+KweATyV4o2NgCSFUvNLFfGPz0n7+i+cwMZDZP  
WJK1ACTMyo1DjUzhH9J+ZNAKcCLQGPAFRjDrWR8osQ2gUfaGTdTSEPPix5i  
1tKD5hpzwU/CRKjuZTr1toWKdc36n0wbQMFaokbdbz24aP10InlcH5L5lhZy  
NXHgd/LNrWNTOLB0G7C2bsHBYCVd+sI+PdCiEBIVfuPg6Pk021c6AOJvrS37  
NfWhxAT4IyYQ/P5RIfKpWR/IknJfr81pw9Re3oHWLX244XskcfeMFvSqZmaW  
ahjAnL988h1tTbieErJ0stkAzKaelOW8V4Nz1yau6W0ZgMzxZTGle6oQ22lj  
e0QDDzLhS32bZSpgwqH1eOYRHkKtFURVKpVATbEurGsTD/FFjoIuLYogYity  
pEadAJ4he3h5RxRgvZQxO+QRAeQaRMbH4+Rh/FmCrsUmAXSxtunYtuSga2px  
RUGdCP7JKVICZ2XhqtW+/WHRHBuS+dRm5GCLEsC2+AGETiwoc3s051QGd3S

/kjNEJ52HY8zpUgA4XH50aSHhkD7d2FUzFEcFCZ4PrIsGMKryiNObxyOgCD9  
6XNlzQgY6Pwk9/qIwbJJ8M89D41gJktaa881ERgJ+1L17ZcRWC89vsJafhhe  
Flo7daoaQ3Hk4p773Ifg8meN51kPjCE9Ztmq/5gQUHZrowN/GUPPr/au0CEB  
CD5yWMpU1QSMrkUPTubzg14Qw3muByaAr2Vr4VHjA7nz8bjVdRPoj700oHdo  
P/A1LvzqVzEFLqZdaw1eXpjf7nMpajlFJ9uHj15K8MDAITx3/LopyDvmXBTE  
7YV2XPMLRxUzGOPI477vzw0F2WUywk1mYFJF3z5WwwHJ9XvH//00g86/p0ki  
quzg25+RP6FsDvoTUfKdfaygLRi0daPRHHgGZtzqED08/BqzYrRsDnVMaoG0  
okxgWkuaXZaxgJ/0vY1p3IzgpLM0rH3dAmBeiJzBSw/f6a/9NzlmAS/oT534  
IUkHHzTO2Uy/YLcE2+1SwFoEW9066jwYYWgJt2/A70jUaOL3Pd1jH1xKm2jWe  
HWzxbd7EBQ1wZViCuIZAuC7+H2YNsT0PnloC/oX+hv25P1hRZVJX1pglfE7F  
1T4nbmOfmckvnf9YAuzNPCvE8xvz7jv7eI+6FQTIMPAt/reB3VLNbx44YQUK  
1uff8r38hf0oLmqjqrSCVxPPLG+8WMdiPa/dMau3go/WhXBpeg1rfVV1S6TH  
Cr6/2glZZVzD/sncqfw5ZwX9d2W0ziqtYpk/H5YWH7UGYxqXRE2zZazH/vHl  
YH1rsFQtPBC8+gPjfvz8AuZhDf1rzQuji9ilzN6zk2XWgNOnNP6+eIcNjrb  
l9Xcag2nXq2HmLTNYqJmQxlnh6n/0x0YnLr0HavZ/zVZkdcGaoVks5vjp7Gl  
h0/x9Eo2cGO6bLM1aQpTHl+MHrKwAYqzVZB39jfsdVmcMpZG7hfVruc3jWJ  
0bDt+FvetoH0PepCOxsTmEEYrc+R1zaw7pS/Lnh8AnunzuHaTXsC7jfbHKOL  
GcN4SnkcS0VOQBPRq21VYBSzo+G3DUMngE53V3CwdwQb7xlz2594ApgxB+lb  
PsOY2DEpo9lLj+DFKY7jSoQhzC//GL7twQkYaKr9uKk8iK04auh6rFLPY+Uu  
vlMZwFTadTVVuGzhoNyjj82ED1iCmL4q0zFbaGD/KXDFqx+jXTA7VudvCxcD  
nPV0H/+HESxspEmnbcG/lj7aOk9lt3ocNSm0hb0Dw7unYvpXFylewn//kKV  
15tQXtH8FnOY8Bfo2bEFzfSxdtrIN1ipQej+ciE760meMgvQ6sbEORI48PZ2  
kHDqrlfjr1eYf0QqC3+MHdwxvUHL970Tq/uYzrBQYAfX74cL0k2/xNTKcnfy

eu0gaYwgtE33Aqu9vqbSu2AHPr/+XFCX6sBEqu2C2VjsYe2OxBEPu+cY271D  
n0/p24OiRVJv0NWNnGKmJwvPC3R4S0/4UsCu0YxvNM0Y0qfYgU5eRif/hMTbx  
vL45sdkeDAd3S/8RWzHbVzwrjz7aA2XuzzN9/hbszZtYyV9r9vCYX1gLt/EI  
e/ABFYUdc4BXg+94fww/wGSGr7+7Y+wAxf9608NHm7CKUUaGeT8HYNSO0XVd  
aMSyp3ujvK87gHXXrSgn6QZsd06p9tpTB1hxrroaZ38fi14q+jo+6gDXth94  
cZ+/h53cdLNyPOAIdm+USSuK9djAn46slhVHmPK/uLQzcAczppF89sHKEd6H  
0Xx6l1mLqbAsy5ufc4Q8nsNBHwRuY7c5bHzP3naExQxP5mEb1dghnkdXu145  
Qpw/4un6WoWxCKWx6+9xAq25gqknY5VY6uFv+qRDTtDjyylVvHgDWz9CTHqi  
7QT/8LcnnRhvYONyXPPqsU4Qb9upl+NwDbNRjBKNKXSCRd9lGb68CqxLdcih  
4Z4TmLd+M3S7Vo41ovLXcgtOcpNd24WewVJMSp9uN4DZGeT3rXaSzlzByoh+  
atVHnaHRNWAHb1KCZVkevynq7gyth0onDH5fwnZOFI66pTiD6BVAReWpIizS  
cXNfaYkz5Crzj1V9voi5ej6l8H10hqOrBWzjPwqxft8jrTZrzpDDjI1nMxVi  
hkGZq3lcLlDqG/C9TLYAU4q2cGczdoEDxXXN4vl5WHV84yVDPxdYrvja4Xzj  
PHYw5cD7UxkuULz/d9VD1VyM6fQXXZqnLmCp4Zugd/YslpytH6M76glfT9he  
WzHNxtZyq+8k/nYB37/29dsHz2Cjl8KEfim7gsTKonTV9GnMqvSDtZKVK6xf  
2AxmGzuFvapQzw4LdYWi1B1v14kM7P7t3a25W65wY7vk0BPmdEyi3ktB8pUr  
mARcmX4tR8FKG177eX9zBZ10oydtTmTsdNv5wXFhN5A5s21gezMNW/4Tl1Sk  
6wa8Wk0eAQKpml0Ou4i5qxvk7Yq6vq9IxmSeKAQ+KXWDqQsqpB/TCVjhDj9X  
zGM3yDz+2Gf+Wjz2V3dPk9yoGzhNr757GBKHvW/v27kidBLe9hgYvlSMwTR2  
W67baJ+ElxYPoUkorHr2HUim/NJMLzcseEuF4VFP4vMTyw5CSXvbvdYOERg  
YzTOakqtJ6FW6yu9RVo4RtDT/zz36SRowNOxbo8wjH3yTMEddnf4dt1Qqd4r  
GIM9/7yzDrpDuK6RMokmClSjVT3lnOHtjTm8ar6AGzCW2lUyNQdqj1life0  
/bB9lN76TWd3uNok3UIv4IsZXseRPwS5g6mF5XYmvQ92/6uMxNmz7oB+Xe0K

p/PCZmjLt3yvuEMa9y+dvP2emOCRfW9xte5wkSOE1VjZA8vw+h02/cYdWmVv  
PXhy6CTWnB6GGxxxh+z99sX+xa7YjxvfeBvm3aHx4MNNQUkXzG7qbUsAqwe1  
/u7rvllzxLLp4Rxe0AMu7cZ+OKLpgD0Vb3ITlfeAxwAddX5We0zKp5Tuk5EH  
SEt2Ktwa0oG5nulebHL0gMC/dT2f+22wgpsZt/ICPEBT8t34wIg19mc62Mzw  
jAdc8CefvshphSkwTh4WL/aA+NYCI0lNS8xbwnZt95YHyF7h5bMcNcd6fXUv  
PerygOYzVfn/5k0w2sz7AYXDHiCSIPW+KccYU68+qhM26wHzhb1LEXpGWMV3  
jkkjZk+wznFinRkmYANMIEZafk/QueOaw90Gx1ikNk6NS3pCj2utkEKtARbp  
Py5TRPSElt74xqIGHFadZb0TYe8J67mOQ7e79LDRW6/em/l5wv37Aa3y84Dh  
5+qjGTI9ITD5G11SCclSWY4QJ4s8YUomjyFfSBerl74k8KTKE2ytOWP972pj  
/IFp7dGvqPKqGS4UsWliptk/8ywHPYHuYV2ocr86Rq7x85Kb8YQ91uyukrfU  
sPl5C+YpBi+YHWHCH0xTwQjrcwv3eL1ASjaW++R5Zez6Tvr7lCNe8GV/ul5h  
jRLmzN1cdEDPCwpGsv0WdhWwZgHrxCkLL7j5fo+4sKYCxntk0fW+mxYmwi7  
tm3lYz2qIkdnkr1g9y/jhR9KcpgU1srMf9YLVtad+sTmZLAMwxOLU8Ve8KhM  
4WpIvTsm65zVmPrIC0xmyydOeklijd5il0xeecH+YGxft5UEthHyOJH/oxeU  
3zhT2Wp6FKsreg1rHkB+yuBiFWflxhrdvbRtD3eQN9804s3XQzzLRRnMeX2  
hqSTKevZNaLY4SqH/6aPecOZRBGTFj4RLPnuWmODjld8H7kiKvvgEDbcf05S  
mok3HCEaHRUyF8by3j5zEwjwhror97lN7gliiwNOuJk4b0hcdeMUiRfADMfX  
jzae9oZ5334mPXN+bM+q1A/Tsm9QXWss6BPjw9y20/4TaPQGr4X5yxuH92Ot  
dK5NM8+9gWHy3vgXKV4ski8/ifTFG9qEJq5zuPBgvYdlT5oteYPxLPGa06m9  
mIx0J05wxxsq5aeYkpu5sW/av1maBH2APjQgqDqaEwN84Q+StA/kbK+Qgrg5  
sFLzY31mGj6wJLyenPqYDTvh4XH5u60PVM3FrtzCsWD3Av8kNXn7gG3kHxNT  
IWaMPfriSXXUD/DS3HnpsocJ6zzdLSGU7wM8FyarMn7SY2J5Xqyz5T7w2DTJ  
89Q/Oiy1eOdHU70PnJ84b/SUlW5Tu6P4wLzHB/yVRN80u0/BCh68vSz02Qec

WLKVly7SYEvtPsmzcz5gOlnmt1m1i6r7ivUpTL7g7jz86MGHv4j+s7KkBZ8v  
WBqkz7+k/EHuU+9YDx71hYWuL9waetuIf3NP/wOcL0yEXLVVndtE0TSlDyhW  
vsDqTrN4um8D/ceiVmzh7gvFttu21a9+oTMHA93nUnwh9sd/jHwff6KZo/QG  
D8/5gpDH438GP9YQ7niZZPoVX/iU6CJHz72GtvX6lw62+EJw5AFJ2agVZBkg  
zyLZ7QvnumqNjhKWUVVe9hHFT77A5yhxoLT1B7L5gnPA//YFiUYlwYSxeVTD  
WB5pweIH2xc/GH4+M4do5P+ccxTwA/OEbvlpwiy6k9z4PETTD5wTzvDsLk8j  
2kqu0TgjP/gs5WVyY2QKObwN2iA7+kEB8XAzx4dviEFQXLYogXr/+ZqW4/wk  
ctEj4SvO+AFvf8zrAaZJ10A/erKm2A90xLx44xUmkNujCxfaW/zg0A83gSjc  
GGoaX6nv6vaDi434e3f/+4xYGc26+z/5wXcDx9MoYgQ9OsHwb+a3H9T3PZXy  
nB5CnMke/Kss/sA5rXDB4tEg8r7xR0mPgD+433zwXfnyR8S9FuPHpeUP8sof  
RzkyPiBfgX6ygle/bKa7dhfn9KPHIF96xMkflLIGlI1u9KGA8zP/qSf6Q6jC  
xG+Fyffo2UPcgl62P7Q2HvBPNO9FfONlDKYl/lAiKA9v3/egDjl7LfdWf5AJ  
zu+tZH2D+E80ngh84w/JL/psUUcXCk3iCose8YeLQ/6zNNmvkdCb1zeytv3B  
nkNcTIPQiSjXj7QXsAbADdeGfEXNl6iLnzRcKhgAzmpNtPaaL1C0nwbHfa0A  
a06a2v7r9hy9yb0g2WYcAEZe06wB6c+QyMMVvU6nABDlk3a55/MUvaO/Hfsp  
MQCcBvJeyHk8RuJyDPnfsgOAnZj00/pPK0q08aj9URIA+uVyHMtVLUjiusDE  
nrYAyOPzc3xx/BFK7o7ZZnsbAMvP7rdcZnuI+lf6ePk+B4CFH+HkoY0mlIZl  
G8n8CYDC9v8+Rq83oEHfGS8VtkCo78A0JxgbkFwuLhUJBYKSKS3Lhvh9NDy6  
3WCtHQh5s48b8ujuInl6+3cuJoGwj/GESFxaHcqQbfzu6xwIhxp2Vbg47yDF  
xKCDSUmBEBPrGly9bqOsa6/VTp0NBLGwiGKeo7fQeNcRq/NXAiFcqjylbbMK  
ZR8YPXWjLRDe1n3f1/u6Ev30/f7E820gMBM3km533UD+jD9/iX40BM4r5Y/6  
Pl5H+F8svhXbgfBLtMVtz75rqCl4f9lJ1iDYc6dSnAFXgcSmRAYPCQZBHdKf  
Kd0oQzQf1AlXNYPa4IdT6aH9pSjUWD/VxSgl1tMfnWJ7WoLGnps/FHIMguJy



FoXWhGLUes9HoiQ+CGSs4gs9Dl1C0lIRbo5ZQXB29EzDKGMRulyeXMR/OQjY  
hhPdDu1cQDG5hYyXHgVBBuu01DZXIZpiKEd2r4NgS82mjk+2AFmn1MTuHwqC  
Ivnr20xW+Ugh+PIM4UYQHB/C9k4knEdl33o02TAGg9pWZNYaXS7icB624+EL  
hq5zC2lFFefQvNHyzqzVYFi9wVO2xp6NHJ9v/7PAB8PW8s8rTiNZqEuDUZ3L  
NhhqcaSuxgeZ6KakcHV0dDAonN91Ls4/hXjLpb6YZgSDCJ3b6Pz5DEThUznA  
fiEYlFcP+G0VpyN3BpPM7MZgeLZ8f8/DPjLqTbZ7avQiGGzI1dHoHwnprnts  
Mn8lhhNvhC4Lq5KQ4Ld4v8y1YLjEYh8impaCzjhllBNoQ8B7qVl6+0gy2uo7  
P8TAEwJ8hNAPk80J600zKmKGYghMJ6t2G4XGIwONhJR9vRD4KZEg4m4ehxru  
PnlEaxUCpsOTCVK6sSivbECSHB4CN1vfhykZUE3YP3ESSCEwUFFVs+MUhUJy  
Fi7tng8Boy0L8fGUSGScTMucejce3HyectNOh6OWnxyg+zQE/h3/LLosGY6k  
ggTi//aGwOE70y4Bs6GIwUlhNnEpBAINU7jqzIJRdJ+2iNa/EBA89MXWWjAI  
fTUkOvzmCAXDbbcJi80A9EzdrSvuWChcPBq/L2vcD8nfDaBR1w2FFvHVqdEZ  
X3RVlkZjwzQU6LOJpu1/fFDi/n03ooNDge+7ibwz0RvNnbs0oZwcCk25n/oU  
kr2QA/0N/p9nQ8H6L53r6xZPpPqzJSuiNhTq39C+Vrb0QD02C32iraGwJ8Jn  
G9/kjybdgr1d4WCuGrf5+HD7ig3Jq10aSYUJPicLa4ecEPig/c2vq6Hgmj9  
0SP3+VxRm9pXrJAuDGwCP1p6irqg2U2D/p8iYeCp8eiRhp0TSnWIFao8HgZl  
7f3Ltam0iLel2vsECoOvVIVpDncdkF4i62aTcxj8jNnaajC1R8Mj2uATGAzi  
IUWuHXF2KFQ75Mz+hDC4TX8TMnpsUcnf90KxRWGw7PBCMTL3BFJw3eMjcTMM  
hpuId15v26BXT5TqBxvDwG3VL1ws1Ab9TL0I6n1hkG/sU6/lb42yv7w68/1L  
GPgxProgumSFRGCr/9JSGKh05lx1T7BCVaQ6pb8M4aC9VbmuXWGJVhUI9ic4  
woGDXTy1W9sS6UyOJ93hDYc14ZWT75st0Ac97k6XI+FQIdlilWdvjg6t3Zpr  
kgkH87EDfxmbzFDgdT10DqVwKB64cyj3wzR0EXZP4FwWF7IDQzfNEEmjWzJ  
+w3DofKJdu6HcBNU5FVZEWIRDtkqZ6JEVoyR3MuPc8Ju4VCex50U/tclxUWH

csb6hENwg9KRxCwj1CHOpNwbHA4IA39D7fmNkOMpjeTUpHCQ0081xusbokrV  
vopBSjgcFo9nUhonopXpgE757HA4Lc/1vCaZiE4TrnB+uRwOW7NGGVsvCKiB  
6V8F9jAcmvcNtnEl4tHOo6LOS0/CQcv93X++x/HIOP/4/PLLCaiQ0rnY+t0A  
felyV674EE7dZztPcXsYIJmE3/Zbl+HwzIwyviRqgGKlC5Itv4aD28IfDKt  
j9izX3TSrIYDPwqMJUXrI3stl3mHrXBoydWT/xrTR9fn1zvn71L1lZd8TuLQ  
RxomEg4enBGw4X5AbPouDqX/aU9u2R8B7eVXFWMzckKi31v7aXuEISPsY+FfO  
GYd82M/MP5eNgHOJAsb97DhU/5ZS06wcAR3RnmvwTQ9tZCcH3tWOGmZeV4cn  
rXoIGcfKV0IHQM3M6mBdoR46zRI+X2oSAX8FGbrjQ/VQb1dATaENFXennMkw  
0UN8WV6B2c5UbiWLUUpfVQ25EVxmyVwRY7dWc30TQQ1WM9vNxQRFg6msoL7c  
0  
aKnTsiY0KgL07to90BoHpHbKONAnKQLSjY37zvQASjUwkHFJjwDflpaxtKeA  
XtOheezEaCzmqic/ggQ9wv1GqPCCHBSyTi+3QTIgaIYCFcigNuMQ86kGVCF  
nqyM+o0IaGL9kz76HNAszdH5Y7URcNlSpYC3H5DCs0M14o0RwJVSft9xDIB8  
Gn+gUFsEBC+J6flw66FniEeG50UE0NLdPF8pr4eY/7HNM7+NAHEBdvo4Vz1k  
+YShZrc/AiT0o1/LF/TQ5eTdgI0Rqj0vxNpjPuqhCe3f0j++RgAPb3lL6GEc  
kv6zNvdtPgLufinG6UXhUGTr4u2RtQgo/cu1hu/DodaEmYC+7QhI3D2oyaOm  
j4y3Ps21s0YcTbqKBrIboMBfz+aKZSJBqa3478Y3PGpoar2dpxQJdmdKh/g8  
CGg7qikgUysS/ooclcqclKCza9Vz0caR8EZlcvP4NBHdWc6dswiMBP+bj9bj  
00ZovT7rNiEyEtZjrxxiOGWMdEIpAbqJkdAvquF0mt0E9SzGzMlkR4Lf2QcD  
joKm6MecyxxDTSQ4+UqliEubI7Xbdrf/3o+E983/fYi7ZY5S/S0DfrZEgvUv  
gdHYoxal87v+3ER3JJBSn2zns1kiuyrd20N9kbD69Pi6Fd4SlfmoB/R+ioRX  
mvF648mWSH5KZq5tLhJcZcwjJacsUewN8dsNq5FA+1bniPE+K9TueSjg9u9I  
6N180UGPWSFGMX7pij1R0li/oM7qZ4UsjvfOFbFEQZWRmz/HWSt0uYLt7e  
KMl/3K/9vMYKTZxkCMgQiALv19cuD3daIanDu1JJolHAG5TswzhqhcLHt2Yj

pKMgj3/fmZ1FK2RacEpxUiEKml06Yj9vUv8n8CRaakRB7ra44Z0dK0S/Xdbx  
FluCY3V3clr/qPLrZNM0E6Pg/vG3tbK/rdBjj2abMvMoUNNd63Kh9tPL+/Gl  
HHZRMJJX+OXUmBWK7u6bSnaNgkFTlqr+r6yQZYrbsUXvKJjfYOPqvGWF5BQX  
YpyDqfrSXjW4Zlgh5um49jdRUfBMq8Pnp4MVmrpMz6SVFAVXv4WHECWs0DPT  
flvblCjAVA24hBYtUSnNocv82VHwYr4u73iNJYpvqpnIzI8CwtPD6gR3S3TC  
X11683IUPK6Jv/KT0xlpHHwZ4VsRBZ+jZRI4IywQ+3+WrR+ro2CBuZ92vNUc  
zaaP0eLvRsG1Tzv7V/+YoYqFjclj7VEwZ6k5ae5rirjbpB9OfI4Cm9hr+KlF  
Q7TieH7b6UA0vL2EF7A00kM9HAf13xyKhruNvqqHLQHden7rrKZENLw80Lf1  
9i5C7tldB/lVowGjvZU4/0kL6YyZ+2TqRINuKf97xQ0Nxj//uW5DPxrqez+O  
XRvQR/9traOP1tHQWmqG3UIQRnfukDMNnKJBz+FkSVuzlspy5/yv0SMa0NnP  
B4fSKSBv3iv8RwKioUz69KsLT+QQdEl6FIRHQxHv53bDFml0MLnp9p74aEgb  
dhAzYpREW8f11sLT0oHZvHN0vU4cDXx7pzVxOhomzGY+1bSioXuXnNlTcqOh  
6R6Z4Y2SKDpn8v1t+8VoULFwNbkvJoL8d6N45a9GwwH6VPm0o4eRQSON69XK  
aOjX/3S7mv8wEvHLucl+JxqSmeRWevhF0F9BwaWkxmgIZ3sxcEZPFA33Vqkt  
tEZDzOm40Dmul6iJopzm1BENQDj3WyjwKMpTe/a6uzsaVgdXzqpsSaLgeVNu  
zb5osA7UKrGrIUGGZZ8cbg1HQ+riuk58/DFEw/hz7vT3aBhQ27A0KlFEoy1p  
ShtLVH3XK960MSqj5hD2JJ+NaKh1vYIJBqqgsI9H2Q0YYoDlSrFp5q4aclDM  
/pbDHgN1DrsZjKlaCHKWWof2xQDD4EWHu+KaSGrOukBUKAZEF7CVKE4txI1/  
FBAkFgMbmX/evl3QQlsVQnoPpGoguV1rYaZNG038TePfvYiBmpPKZVUpOqjL  
YWrZUCMG2LSFVBeP66J7TYavC7AYEBaVoinu00WXuevKRgkxIPb1vEWuB0Kk  
4L2xEuYx4GSeFVU3jpB/V4xZuG0MMKkRHw8RMWQlPiLe6hID0QG0iUtXMKRF  
Qn/pvGOgr3n5b/8nDImNXv9gFhQD8onXjZVpALFqMNveioyBk4X6AZdZAK0V  
BlEmE2Jg5YNa534uQCPL7x1lyTFw+uXVly17AXWYqCjGZMVAqMsgszkPojrq

y8xPz8fAegHKv0I9L6Tb+cJ8KQY8T6p0B3EDSj7p8ci6jOqvlv17sqjyvNs6  
c0tvxoD0JTjTQsWmB2R8Z+7EgMAqT0M39b5KVK6uQhPVn+3zb8l8gA6+X+NN  
bIuBnF9HJWsPAaKXtV980REDt3LFeLlkAS2ebnvB8YYqP2VMIVkb0Mevh6/Y  
98WABMut4RITQ00oI/LacAz4Z4ft4TwJqKpk1mjhSww86F0S/hsBKNb6/lbq  
ElX/805fuxJAbvX7/+v6RZWnyXRz+C4gAmtiNc90DFRfuM9m8grQgQ6cXRVb  
LDRGjXyR3QDUrDjQ+E4qFopFpw9Ne+ihihyNswcUYuGovfhRyxQ9IDVX6umh  
Hgts3Ymv+S/rIYdrPnt/4WNBuPnME4a3egh2umeRWSx4u/+X9varHpJylH+W  
dSIWdK8Ytyn+1kPcDwou9TvHgloqJsnCiU0/uTddd3rFwvihjUQxURz6GuxM  
8A2MhWcFD0LMIXDoTddT4XsRsRCw/PKhqx4ONYiL//odT8XGQRyi5jhUQsrq  
0SfFAvnUwdeLDjhEGV28kZMZC+EG9y899cShQA2rpKHcWDh0cH/WvSAcsr7w  
wFq0KBasdqyU31Pnt9aKgEzQ1VhI+BShIpuEQ2KmqXseVMYC87VUiQEyDrHe  
+jr8rzYWhPCUyk+ZOLRGR7xn2BgL1x+eNjLJwaHPJ2szC1pj4fzMxXsaBTj0  
so3r50jzWOjvblm+X4RDdw5Eq0l0x4lr/q9CZwk0Jb/XmW4ZioU/s4rGf6/h  
klcWrcP1L7FAMBv8nnkThwg3X7/J/h4LuZ0XGH/cwqG9Sdb3nDdjoSVqceUS  
IR9uTB84YrAbCyHT5VxMjTg0ajl2UY4pDl7M5K9cf4hDz9uuM+/nigPRojpL  
UisOVUn4J+3wxcHPveOLje04dDb/2NL0oTioiOekWL/AofC/a+69EnFQMCv9  
LrwLh2z9mj88li8DJZLQ2S09VP/0pxDK1aj4C6ux3QA0HdbVb8IEcUC7Ueow  
MoJD9LeY5cIjYAxfn/fNiID71MK9+rZxQHha/FLSSs41DTrkCHtFgc37ByH  
I7eo8bI5tLnXNw4aL7/u6KfRR97St0e/xsQBcak/5wuPPjK6EGrxNiUO+sbv  
LVw8qI/kd5U7Gk/FwYS28Y/XEvpoa6C9OuNiHFz8pTB4X0cfjWEZgiFX40Dv  
+FOtKEN91FFjlGN7Mw5Szmfrvjihj3JIA5ESD+KgIcWJXyxMH0UuFE9zPomD  
+tnyEK0UfeRgd9Jh82UcGKpUOq+f1Udicv06XQNxcEIy60/JWn3EdOnuvXuj  
cdBbGyon9FgfLe6JOVI8FQfLbxqWs9/po0dDu8yB63GgXJgqc2VNH5mm7x9g

440HJs97xnQEA6S4NEJYF6Lifo0l7y4GiM+xomX0SDx0WgoLVkcoEl52fI6  
5XhIQLiXR6uo+8QIBFrYxEPxZi/s4cAjZzzjmLpzPKTGhucySuIR3HtrleIV  
D1UhAy93AY/YTtuprkbGw1W9q/9io/FoZUXo1qfEePgw6na2OwePBp0nBTso  
8SAZUrqpQqPKhSDaQoL4mF1zkCafwiPTpUqRiWVxMPABXZwWcKjQKbNaa/r  
8XD7PovPDD0BqYyR36o0xMPuE9fFmOMEJGBIRMKt8bAYtHfYQp+A/jWw32fo  
ilcK5qYpfjsC6s66VDTYFw86Z90iROMJCDe7nK/+KR60FWgUqcsYekw0zLk8  
EU/l4x0rYoUEpFpdkfX7ezsm1Riay8joHrG3+lOy/GwVv1seOcWAUn6WqW1  
bcSDmOqn+//dJ6CKztuJB//Fw1Hf+SXxFqo9R2ljUxgSgMTvOTvbTkAFGU4R  
4+wJ8EC6foOVuu+xTTUEY7wjYBinE5nQSUAZ+mz+FUIJ0Dqe2Cj2ioB2rnt5  
7TmSALLnKS6a1PNY2sdunjIjclgtOZ+den/Zg9fphWICKHw7LFb0lID8nwfB  
imsmwFeFsdj3rQQ0KdJpeQoS4PG7o1v3mwjliSRsOkNMANY3QE71OgL68CWG  
SLRIgN8lwmIOlQRkivXibtklgN+hu1c4Swios0wCsbglAPelvG82uQSE/qVq  
BvokQKK8sqcomYAeuQ6pvA10ABlOZlJ4JAEpPDmulBedAFUnSTe1PAno9sEs  
2ZykBlg05dBOsCQgseQjSVKAuz7d/j2UV0CuvJZQ8wiOwG4yqQdNKUliFc7  
X/hefgIs2F65V7eXgHJK5vj3FieAnMWMYPJvPGLc1uONrEgAh8ak3atf8CjN  
sYTrQ3UCrNX2vGj/iUdbzWusKncTgOJp/Ok5NZ/m427s2XiSAIV388hTvnjk  
NfTnr10n1X/F2rMGBng0qnZi61EPNR4zQ9p9h/Go9xf9csLnBNh74raJ TZ8B  
Itq6zo98TYDJV8+GtasN0LOmB9Pa8wnwn37uumqSAWql8h3d2UqAg7TciQbC  
Bkj2Q/uQG00ipBdVNzks6KNKpQMfnjllwqHPjw4bP9JHRauvu8l8ieAoK/JJ  
1UgfjYZJP2JQSYT1u3/305/EoZ+95AZf7USYk+D5RDICQ8HyI3WvcdT7PLk/  
hmeo++6P7MozVonwgsKUKRmih3BBi/kcYYmgkCTerJQCq02NQU5obCIE4fLt  
Y3DU+S5zNet9SiIMbNFo5zADkpgzS8s/lwjWk6G5t45jiNXvbvD+mkRQjDE8  
9zpHF5E++tPtb0iE6sg/m6wSumhDX6yEtzURviu/WuF5oYOCGz4r8HYkQrZt

8yLmo40+ilx8ve9NIshGT3qssesgh/Pmbvv6E8FLzupVdqs26t1h+sUzkgjv  
BA/kBYRqI4Pg52d5viYC3ShOdVlKG7W0JlrxzCdCOfuUbPK8FlIwUmnZu5YI  
Okas8+GNWqjq0Q+LvduJECXfOX0sQwsdlKie4aZNgnEH8Yv7XLVQwQX3FG7W  
JOAt1fiVhLQQM50gLzdPEoRtitbqSWqh1IgpNVyCSeCXtGXbwaef1r+c0+MS  
SwIXxQNsqhxaKNCCmMwpkwT1Yp++/MeqhSYe74ZyKiVBh0PxXA+XFrKTbWHg  
1EqCjdEGXfeDWqinOLKUA5cEd5pJq88VtBCOWU6ZwzgjCL9cBaXNtFBz7HQ3  
u3USSJTefNcToYXkp8vc2Z2So0Zhg8hUmRaqtHHYZPNMAAnXzCamqAS0k2LE3  
ly0wCeSCz/wx2qeN8hTeirNFJsGiAEs9o7M2YizPaGNNTIJB91bbfXe0UTIH  
smalJIG58RZTNaMOWkvanGXJToKmL8IjW4E6yH/+XhpLQRL4y5yexD7poHGH  
QD6WkiR4p3xOudFKF71RHdNnrkkC+Vtj7H+o/BYqi0aYGqj6jn5p191G6CGP  
ZQRTaxJMZM5zn7mKITkyCzNTRxI8DDrGzioB6PpyRxnjmyTYzMX/Yk0HxO+W  
rMrYnwS+SkG9X6cB5fao9jCMJMH9ER0xOnM9IHj71m/6+SSoNF33zqTypZUD  
nnn0a0lQe/hAQG8dDvmeFpKk304CG9Zantjj+sjaK/cEHWsyDDbLhCUhA9TV  
R1yg5UmGoaBn0fMdBlSD91BoBZNBmOPGk3h9PJIRjr67RyYZ1E/VSCqpUvvv  
2W0EPUrJENe+/T6Z2s/4tmdGabSSoXtnpfsoOxGd86+IosElg3vQkU86QURE  
O+TISmOcdGHHpZ73PSOiePy+a7tWySAberG/zmallhp71Hcdk+G18x6ZJhND  
5C12uvefRzLE89IqiaYZopE8zOdfQDKEvzwmanLTEF nubv3ZiUiGqULBNrOn  
huhVSEPBTklyMNe6veB9ZYh0RoOkd8jJwN95PKv0mSFqMD7670+ZZGgoVH7H  
12SlpFrG7f7mJ8P7ztivd68ZojLJyz/+FCcDxpbI337GEPEWWWX8uZYMvfva  
n14KNkRn6dmE/txOBvz5F1KFxoalU6gUPt5PhirNp/9eihuiPMVjvndbkqHI  
+2Xx/DYRXXCzu0/VnQzXiD5d9qVExBczMajblwwZD033cP5EdPlsxN8Dn5KB  
ZFHC5K9IRKXNhcSe2WSwLLSvufWYgA69Fw+pWkmGxYJfxn5pVH9PPyggbsXD  
cZl8umogojs8w2MqzClQfxQS1DvwSEo6gl6LOWXGf/MutmXgUQ22LTV3IAUW

CJfGRYzwqD74YPRVyRT4VHIPpvSTAVJIryuOO54C7l/N4lupfKOhGD21Uk8B  
9rXKY91xBkjl3vspWSwFFOebDUzNDNCjV+6sjMQUEJ489+i1pAHSGls9PmGe  
ArI/jpCeMhmgxz8ptq12KXBPnHz50Q99hFh5ky64pcD01ept5RF99EzkZkWo  
bwr4hJVUNFP5Ek5d7ZVhaApo33XJ6O7SRy/NXi+IxabAh6jV8vm3+ojg7bB3  
JyUFqkfG8/IG9VF34pza0KkUiOCLOHZqisqv8hNd7uekQKlKu6rQL33UW81G  
OXsxBT4a0M0fZDZAlu2l1T5XU+CdXUr2Ceq86B849g67mQIqiQH251QM0ImF  
9jWBuhRobafPz6W+b3CPJf96UwpwqJyLO+pvgD7LR3rdekn157KNqdY1AzSV  
9fA391QKmHtFCx0WxiPfcuLhhYUUij4+9GJaB49mHwwbdP5Mgan9ZQKFLIT+  
1BMQWP6H6q+bPxIGk/Dox9ft8wl0qSBd+GB9thiPwn+ffWDDlgrR/f1ufg/x  
aI1L+POxfalAjnnN7v6HR9ES9TTMQqkw1HrqufscHm3oYBJfxVLhd5m9oMYu  
HsXb/GfyWCYVQow3xVR4CGg7wCOiSckVHo5Q2OjECCiZtFYUrpUKjiH89Dby  
BLRblP7YGJcKI4cHdfrVCIhSx/tV3DgVHnONTMtrExD9y5tMu1apkO6E036A  
ik+PqB375JgK3VMVXjjq/8yrr60bPVLhYqL+5dtUedlmjvE5AamQ9+Rv9LOj  
BMR+aP6qXwTVPu1FlpdCBLTXhH1OijwKguKLpacYCOiCx1XOjaxUsK3RbntC  
5Rd88flq/+WlAv1NrH/wBx4J3rRMy6hIhQ6FbzIVg3ikcC/62FB1KqhnykWl  
9eARoe3yZ+m7qZAmInWF9wUeubx6fCb5YSpIvnsqk9+KR5F9E+rvn6RC2UP6  
k+yNeJQ1Sj8j2knVn1vVyHUHj8q+S12I7kmF7Pce0Rdv4lHTminu9YdUWMfM  
zt0rx6M30+ErAp9T4WRl2kxUCR5NMF8sC/6aCn3PuULXLLl9v6/F90lcKli7  
8nJiBXjEfnhse+9qKsxqV94PPo9HYjJ7bntvpUKx2KB+LpVva6getX+0mwrB  
g8/uPjyHR+ZgxMDKlAYBB5MmtqjY2ySk0YUzDS62CD33y8WjRLt8j7v702Az  
skWHLx+P8jwecNEKp1H5R6goD1V/VfCnJyfe0+Du9zWJJ9T86aelCm4rpQHd  
zwdXfM9Q+/Pd+/0GlmnQ/kKt7moLdT9o/Ui6Zj8GuZriNZPteGTX+Vt+3i0N  
TlleFC5T/Uf5rHf2fEga2LxVxoTf4dHlGR/Nr9FpcHXegfVAH7Vfrj75rpKc

BmpCBQO5A3j08m/dxcz0NAgiR6bGDOPRZ6Z+/ZHsNKiqGVbmHafmL8/GqlxB  
GtyyDjWQmMYj5kOCFWnFafDytUy5FzW+h6SReX9FGpg4MChnbOCRiornX/Fb  
aVBo/WsJoyEgY+x0TdzdNFiiX3tuzkpA7sY1Dm8epkHDk7USf14qH7ftZRRu  
TwO5t0v++EMEdM59rSmsk3qeNCZ4VZKArgfxeXX0pMF14YflkgoEKj/Q2rt/  
IA2UdsNmStUJqJfs9tTvcxr8F0o73kTlw1PnKCGtX9Ogq9U7RhJHrZ9LVUIc  
89T3KeZeuWNAQNw33nSfXE0DdtFY7C8VS9QvxTVspQHN8D7LXur/ZS4shbQ0  
JLhc6fZ4hCpP2lNovpaOBDIfzaI+Uedjk98xPVsmEjA0D3tRZAgiC8Eu/2Ml  
QdqVjeQcan28ibRaruYkwfy7sroGZgKyjfcjWPGQoORq19TtVWr+pcRc3d5P  
ggmHoL2y1HoISs9cvyFAAh7zVLGIB9R8zCo2MRMmAfntFmNtHh6Rc2uvb4iQ  
gHS4v06Ayr/ZLzz5XS50Au/LexjXVPHoUvF7SyMpEqRmpP5b2DVAYuWT1Wuy  
JBBTgtNPXxigusqf/64cj8GNZd1z4mQDpFHDYIdXjsEjtrDdfnUD90Lugbol  
NRJkfxjTS/muj8wfsNNf1iJBQZHh3MJ56v6MW7yVh0hgga35uEnpl4/39WZn  
cCTwTSA5t3CoUCXiDUygQTXr6+cl9TFoeg55UuJxiTo5gf7V816KDV2QzvK  
nATjmsFWe2X0UCZdy0SQNQIWvCLP3skDVCKMZFYdSHDwAv3M63iEKmto3tu6  
keBlOkdM3h5dVKf+IsrckwT3oh8sCERqo2dWhk+wQKr/Dd9tnmfSQG/GWT01  
QkngXOOuNCurhj4EvWNUjCTBXmManRQTFTS6db5WOpYEumqpT9cTlNDMKWtL  
sUSqvt2VINtOBbTCs/+XYCoJbgaNT5jEyaPf5UPF+ygkaB48tPXpoyyiPVaC  
2E+TYOrkf0meHdKIvdXlG302CY5LibxZc5BCfMTDWTs5JMix0ta7/EASHR6Y  
lNvIJ8GxHXPMfV0SSXlU9i1dpMbXNEvMQVEaKS35xn4vJkG/sfFWeros0kmS  
Fpq4SgKX50QFgXx5hGdefDp8jQSVs49C89kVkfnFeu++myR48nOf9vQ/JeQg  
FsHy5jY1P+UH5Mu4VZHnXeX6jjoSmPptC/crqaMgnQ3rtvskGA3KGi2y00TR  
3c2bjQ9IEMBGQRqH2ijVLqn0TgvVf/u/HZDx00VZ33T1bj4hwQ07Rh1xNQzl  
h9PMXH1OzQ/qTpvuQ43PTkd2USfV3m/fzwWy66HK7FPHz3dT32OwWVVzVQ/V



HzAcyHxHjVc2zclAYRx6VMmaQOojwaDee7v4Ahx6pvh000EjCaJ/ys8e+YVD  
b9rPd0R8or5HeqHUI6iPBkys/QLHSFAe+j7yfZY+GhvmZfeaJIGQabXfj2Z9  
NOMzdm95mgTmpijBYkgfrawV256YI4H+75M3M77po+00l23THyTYHh2aExrT  
R3Qch8vxqyTYKKqO632hj9hLJvXRLxKIMmp/vX5FH/FJVs6q/SaBYyc+KjJA  
H4k0+eYc3yHBUuFqvJKiPpLWk1aS2kMGZUV/veENHFLqXRgUYSCDq8sHQcd2  
HNJxrk8SYCFD5YCLTc1ZHCLMhovwcjDBxVFe87knDlnEKHey7iXDf7cjBAuJ  
OORAuxFAt58Maqcs8fsRDnmeb+b8y0+GoZp1Jl1j6n56MKlx/SAZJu81tLmH  
4VDMbV2HHyJksE/w77tyA4dS1Wh2psXJcAqxBA904FDWi45r41Jk2NfUXah7  
VB8VWJ4iDMmR4VzOuOW/UH1UOkZceK9AhtOpybX4x/ro7maPynMNMhBjJjw0  
Ohkg2t1h4VgdMhwIFnr3j8p/7BinGWWBDCSzh6GNMwboL+/O8AUiFctOe1a6  
45HIQZYOIxMyVHzG7btdhEc3juyv/WdOhuRrwXYhb6n9Skb0QqM1GarPXvDc  
2cEjY6VjKf52ZPgTMRLic4zaTzU1fyWdqO+Xc6u/70BAq4C36Hclg3AB5rSU  
SkAGhlyamR5kyE4qq5YsJ6DLFq6iOj5ksHhW0hPQTECLdgGsq/5kUNQ4sfus  
m9pv3WJ+3gwmw9/W+RjNfglq8CGPOoWTIUMk1ffLfwQ0E5zTyRVNtVfzdgFH  
JwFpRRfXv4wjQ9LQr77MjgLKSbp5KSGJDNcp7d/QdQJSyX4S8I1CBmmREyea  
EgkoM7/b+vJpMmBic8JXfAlo5PJHbbNsMtBYZZ/nsiEg+YpJcdpc6nnTlfGb  
VL5Orv7B8SifDBM2ZFg7TkAD9b83gi6S4aF6+XyWKAFJPWSYECkmw0U/R55/  
+wko6cne7o+lZHBb2PdjmoM6v14KN2RXkOGGySEePxYCEuuRvojVkmG/d945  
EiMBxXxQzVivpsavCDP7Tk9AXSN6IbdryRDhoUB3m4oPfwzc7tLhl4DP9cP  
VD4WPuel7Wskw6Wns6zR1PnzYsVHqushGZisWlovs1P3ua2lvSmtZLCLHxOy  
oPLlwN2UbcV2MjxvchyrFCCgdsbsbzPPyUA5pVRfTeWbezmLeq50kuFdQLDu  
/+Ppvf/6A8tuar5OsGktaFLn8cH6MoZ3ZAJ6sqn/gUjli+Ktma3/keEM+6Q2  
ix0BnZR9FR42QM2n4oBKG28CYtQax336TPV32VNOLxIBOerNy+Z+od6nruCv

cgjojuEGr/43MtxNf703uYSAaCxp/230kKEjQD7BuoqAbOw5v9+ZJ4PvhLmO  
wH0CqnIT/M9jiQz+JbR15a3Uee8j0cK3RoZC4yPCDzoIyCxE6frbX2So+pp3  
SJqaPxXR6CzpNxlw4r4M3oJaD3JOFp1hwyHRRvCHT8QEDHdznWehgKXcfeU  
64clqCTbk1BOTwEuYdfQzM8EtJQfevwEMwXEtjOOzY8TEK44kZ+FnQJhR9ZT  
Pk8S0MWK03vauShw4WtssPsUAc1WF8xH7qOAEvkTQ+oMAencLfsgeYACM4az  
dpqzBJT3sObxqCAFLNPDgi/NEdC3Jw9v5h+iAEeits3VeQJS6+zIJYhR4Eks  
P7/lApWf9/TG/TIKgTtdZ/XeULGL89n6XWkKPGe8qKy9SM3PeeI0nTwF6M99  
w25RMU0C/UFmJQpIrQhviP4goH6m59bsahSYfDM/3UzFIUUpZ7i1KPClcaUs  
ZYnKx45qPeNFFBjGDd4jLROQYdPGBj+OAqlcuNr+FQIS1G88JkygQMb9EeGM  
NWp99oV5ixpToPQZ4fLNdWr+uMtdOWpOgaQBuRrijvV9y7N90tYUaHOurzy5  
TUCeqTeZ5e0okGAcD1d2qPXH4YkpOVH9/ZDRYZmGiBhLD8WquVHAQ2nWyJ6e  
iG63XPqGfClw4Pq4miUbESUanhDUD6TAxVbu5SF0IjId4rYihlLgq+x/f9x5  
iGhl/Uy7RSwFOD0Vc7wFiKgjnfdLJpFqv8lK78eD1P2dh07OIZUCdzesX6ij  
EJGGQnKx+2kKyNB6ObyRICLWpxr/eWdTwhRs2nVTmohGzX4xBuRS4HRCex/7  
MSliBYVGRxRRoCsn+dM3JSKy3papjSmhwN7+70NlqkQkfub7ZEIZBX6FNQmo  
ahBRV5W7BaWKem6VojOjQ0QlqsKnT9dQwO3JAZttRETBLz89zq6nwLmrGVwj  
QETIpuhnbGMFjv7q5GbgiJ7q7VM4UMKrA15+W3rE9HXcC6PS60UcJY9qKyD  
J6Km3beXrrRT4MHPPrDPGBCI6nZvVW95BgeJj72gliERkL4xmqHxFgfKPbOrv  
qXhbqz3yTi8F4j3pFXMMiajMQX2iaZACLGnZGmeoOPz7T76WEQo0CbbuYFSM  
i71n9mScAgLcDzm7qPd5GULynn+lwH/01+jEqHimULqtc4Yckdtl0eZU/c1i  
M6vd89R4zvb9NqPal33/ulTvEgVGxVxlRQ2IyAVOnuxfo8DHm17Xuqjvk38v  
VDS4QYHDoczrBnpEROM23DOyTa2H+NC2loyl+hcv0H35RwG6583n23WJKJaV  
M+I7YzpY05x+WqBJRiBfb6oXWNNBZMXcBNSJSFAqc3yZMx0GuLMMXqkQUTue

xnSLx0shwa/uB4noryBx5S/gulgGqvUEC5HRJ5eCS00h9MhXyPb2o0abwby  
mgSLZDq4CbS69ogR0fg3wZvbMunwS/h9vtthInpI0D+yKJ80Bybdld8LEZEv  
+4XD79XSQfrIt39mvET06pIq/0VCOjR+kk3uo6P6d9u16LRxOsxWfzQJ2KXW  
l+tp3njzdGjtKeZepNaDxJEhbme7dPhXXYHerlL38/p4FIHfdIg+9Svv6hcC  
ctt7LZMnMB2Y5tpDtKj9Ry26m4E+NB062/e8+TlInXeagrTfY9Ihx/zIqwFq  
P2svxZGGE9Ih8X1xF/NbAiraDfzXnZIOzpYtXJGvCSjU838UWHk8IV0XIQgl  
ZUjKUEqSZM4U2za7k3moUF4hKYokaQ4X13VHU5IkZcpUkoQKlcyphCKJ0oRU  
kqTv+f7cv3uefdZZa+19zr78E3fPxuDlyvY22SZbsH14d/Z6XAzee7N05+99  
W1BSG4nKTozBDbeEQjfx28I0Q/wX0zkGbeXuVebfje6rr/pHznJjMOXLRYOo  
00T/dfL5Hp4ag2dWfFW5ctsWTt2MC/M/H4MnI2fKNatswU02dML9YgzOTS0R  
V75F9KdjPSF2I2PwYOjhvWeI+3jR6/nPRldjkNQW/cOFiAdhY7B6YQz0ToSM  
ZBNx1WXHMfkSgv/ajKBg4nuWUFTg0ooYLJa1u3GXyB+4N2dkvjIG2UNNUxnE  
ewFamv0mq2NQat7HS5TAK7vl29Db2hi85rJLcTlxnnH2qt3P7sdg3QPJ4KoH  
tvBoymKgqSkGWzSbwhc8It4r7sFeVc0xaHryQdCvFkKval5fflsMjnDcT2YT  
7wsH+bue57tiUIna9na04F/11LsXjOcxelgf9liOuA/mh5a4neiNwUkSd/fM  
qC30W0I3h7yOweWuR19dJvpr6TVvp91DMWjJ03hAfobQWyyuw2kkBj1N1J8G  
CNrBrgMIVMuxGCwM/FW5Y6kdGHS+aNH7EoMPYlPdJ+WlcktRfSz7IwZXlzVL  
SRL9p/6Xg43oTAW2P17TnUPUS9rOo42//8SgzOdW/iDNDmzXNt97vTAW/YLz  
9xw8YAdKMZnmHSKx2NWdIdN8wg6mR+Vq7y2JxVu79iztT7aDa8X7qnOly/He  
bxGFrTfsQMRwSUXQ+lhs/rQ5RVbIHtRkTh6W3RiLp0PU9gussgfyT/GtTeqx  
ONU2052taQ+s4u6aNbqxuG7NF9eF3vYguzazqQdj8fjcsM7hPXsw+rskPtY6  
luiHj+5F9dvDzv6TJF37WDx7Ithx2bQ9ZKf815HsGItn3B9kZWqRQFVsU6/1  
rlgUmNv6b991Eti/z8yc+i8WA37sKKtoJ0Fwo7hPTkAsLq8/XdY9QYLSk5Nv

/xyIRd+GC48KDchgMHX7843jsfgmOnf3lw4y2Lyy/bf2fCzGWkuM3l9DhcDq  
6gcdWbGYcHjD0UgKFRJS1WNP5MRiZELakv+OUqHNUUKsNz8Wbwz8vVLQSQW3  
phdS7KpYNGjsCH1yhgb+Jf6qf5/FYhr7jwXnlQPQGT1jRS9jUdmvwtBb2BEK  
9toXb38VixULLj0t0nSEL8oa2pXDsxhN+fzOK6cdISLtu/H+b7FYk6XaMSLu  
BGmHA+bkfsai68g50+M1TlDt9LL+0QyxHzP8+DodJ5hbfNdqnUActt2xe5zl  
6gQxp8/R+iTi0L1q/+sUnhOojOT59EjF4RM/9m/lXCdosn8c8kw2DvPvuAvP  
lTsReD+e7Fodh8rSSqPy95xASEqc1a4Uh4uZ7RPtjlBXqRmdsu6ODR+1Ceh  
10de80VU+lg1Dje8u9v+fcQJ3psfrm9SJ/Itu277fcIj6HmpHQ8045B0Q8tV  
ctaJ0Kt6sF43Ds/rtLVZLnSGxyH943cN4nDdj0XJJ5Y4Q1D33Hy1SRyG+gaE  
3JRyBlHDNcuqIA5FBg7YvZZzhoLFmtuWszhVffuj8+KzkAS8Ncqt41Dh8tM  
h5fKzvDjn25eQo5D6aoyTb6KMzCeFDgWocSh8xFuqlyqM6hrtu7Od4nDFJvb  
HxyJuJX39WCeRxxGjI87bLLBGQ78Wnbm8s44dLk58r15nTOIe+tysnff4Yji  
r02TSs5w/b5bzgU/4nx6e0SurnIG2oaj5RmBcbjeq9TnNYF3PPH8/dTgOHw/  
67MoabEzsMbvdfc4/DEsV/9VwWcQdN1clgdTpzPTOCW8k8n6Lwt8l0ZGYfW  
JX9Dvn9wgkMK6xcwouOQqXXkzTKC3+VnbSTjT8Xhc/Uvw/ubnaB8dK9y7Lk4  
vCo85jx3ywmcYayds/Q4TFQdF6667ASTpdctTjHicMmPmN7kJCfGsnC6H2ff  
YflzzStRh51AN+rbf1G80BTvijDfv8MJul9Lhx9JI/Lt66PvNHOCcAuDc+GZ  
cSj++Z3LNsJfUte28w5mxyFHT3dWaN4Rbiw+nnsGnw6bq+fqSHccwfXgxRv7  
rsVho65unuYhR0gxGu7eUxqHl4zF8k530YD+RaF3vjfisNT3/vp7xxzgxYKN  
332q4vBZ+VKejZIDyLbul95eH4fbo3l0i7xokOHZ05XaEYd+tVUSxdUUMGpY  
6U/qJvSzVLHXo1KgT9UkwraH4HOH6d+2QTKsnjyVgoNxSG830w4XJEPWodEX  
+uNxuPoxSulQ7cH0g/qozlQc9nTXnZ0asoMBCu2n5nQc/uYlyOFRot+t4K3Y  
NB+HkQ29knWftnApX95DUYKOS/qUmj81bYBBjy/qkaTjaQvXDW6D1hAR8H2e

vYK01Am3ByZca9hlvduVtlqOZa9Ep97YWYP9+tZ8QUU6/v7nSooVtAZdQcO5  
u2vpG00uvyPogRUovs110qJCxyMvrG62xVrBVHb07w+b6agsfZZa5UVvD75  
nnZZi4400jomuh8t4ZG3S+5OPTratl63Va2zhPjt9dPShnSMHX67xTjVEi6s  
Vqe0m9DxuEh9T0aYJdB/p16iAx0rxjTVDrtYwqHeBT/MLelYoL9ObNrQEnbe  
DrH/bUPH7vNxvo7rLME6rS/rBomORY9sV5RIWoLmEZtv+2l0vL7PVCjskSWs  
cquw2eBMR2ed87pbBCxBSE8xc9CNjnJtwvuK/1nAuGTiePp2Op4Yo2eMClIC  
7+QPS2dvOk7rLy4QW24JDZ2+6Yt96Sjge/KUjblIXC9t+9y4h44r5ToEHxtZ  
QnqyEZ7cS8f6JZ/kaz0s4dyBvBSD/XQ88LG+3OW4JRygLP84EUpH1m6Tgupr  
luChfsKsMJyOhQrkj/J9loBiY1y/SDoadb7aWSRlBepjru/lo+IYtWHgHdfV  
ClY8vmfy4iQdKzu27RflsgKBa5vZrLN0vBA1+nL9Fyv4FJv+zi6Ojh1PHy9X  
t7aG53sWGi1IpONaQtcc5lnDPcuDzBomHf+jfj2XJm4DKQJ2W7ek0NHmxqrf  
ldM2cOrNjcT36XRcsb/ufVWULQTVKw1eukDH8BGnax+JecXsxDRd6godVf7K  
L9i1hrgfVfxetV4j9PNfOZpXaQ9Sjh1acUV09DX6rUijkeD9r6u9vyroqFj1  
a00bnQycw+7qA/fpuGc2ZXEHOA2iXR6cSmuio8ntqNF9ZcT9orPlmWMzHV8K  
uLw77uwAxBNCJxo66Xip5UDvUp4jqHQC6jr+jl5BYsbMJyudQKLktrWl8T6  
bbPl1AAAnGA6ubM8fp0089Imn5/84QRtp7br/hulYczE77L2VM9xWY0aufk/H  
uZNBw2YSnYH5fs+a5K8EX2K9+yMkXCDyYedh228EvvObtHypLuCbt6353w86  
HrZ7lLoy3gW2+kmHhc/RUf4x3e7zNxdQXfFZfjVAPG4dTlxwba0ryDY3FNxb  
GI+9CcbTXhRXWHQ80zpQJB5Rpfnt5zBXmN4SPiS+JB7PIC2J35DqCu+HSCdu  
SstjaqE/Lsq3XOEIX1lup1Q8ZvVKfq186grNtr9vCsjGI/1d6/dbn1yh+neX  
Y/6qeNz5Kk949p8rFFwv+ExTjMeCSLkHHpJuch73mfgfa+Nxdn9u02Uln2BI  
bV9/QSuen4fVI5ZvdIPoh1r3LNTisRbGFHDouEFwlljX2OZ4hMQL5YeI2Gvz  
m2mWVjwOibgJtxPrqYNVvK168agWllxjReQz5bI0XxvEY97xxtCiZW6gYR3Y

cs4kHl8NhN3v+eMKir/MAjdBPFicZByyh11BomiFYJdFPJ6LUa3qaXSFee+v  
FyNt4lFaXyXd/ZlrjC97aKxlisdTsonsyQhXeNOQ9aKRGo9mb7vMTlq7QteR  
iLBgp3gcJh/Fp0td4b4adamkWzyKLp7Z2tDlAuWv1hfe9ozHjS86ajcku8Bl  
1h/rXV7xeNPv6OGnli7As3g2JLQ7Hm33hcxfnOGcz+KThT7Efx0vjked4Z  
wvPPybkExu0Lu9ofBoydYc/OnZUz++KxLOJnsuAzJ7C+L/bFjiwe5zR2X517  
7Qj6h9/Gf4mIx2V9Rl4L3jrABtU76/IR8XhElvNx8iUNFjGDvIZOx+Mjc/Zb  
g+sUaPZ83BLNisfGw+Kfd4kQ8+LiS4HKvHicsFFgGz+zgcK6SMHm1Hjsfi/a  
cTzLGhjrVU1WXIxHDe3erofqlkCZiC0sK47H4i29FSXZJmCa623jURaPkVr/  
YovACDTc9d/03Ygn6m3X7ooPW0H87js5ck08NnNjeLNeOjAXcrdyso7Qe8bF  
PN1dE76u5TulP4hHMctk4wRpdeigWyaMNMejdjblEndeGeqNV6sktRF8tSh+  
YAUoQNmXb/d0uuKRJXlqaunmFZBz6YlX77N4lOG0844XigPH5fKvUy/j8UTK  
OteJa//Mzggf4294FY8zGSueeUq9MQurdtJqGyT8v+14Hhz8Uue3X601fDge  
mzojDl6UW1DvoiSwd9V7gt8jb+Ysf4vVP9ie4LTsUzwyZzYJbfxvF6bv9xE  
eDwevyZ8o18el66/1J6x/s+3ePx+S7cv5+WKeglR5aXffsZj2JMd7ZWZsvUn  
LQun3/+OR5Olz7aGrJet/3JCZ+j133hUal08usNHpt7r9p0n3QsScloaUrJY  
X7K+5ZvFzWbhBBS/096gpCpWb6zRklUvloCVEmzam/TfdQWBLvTKpQkYZPon  
tyG6x2zl5f6DRZIJuPbZAetdl4SB/spvR86KBjzcNaJ7Y1gGfq74bJm2KgG1  
xVOPRtisAX+nwxpMxQRc/WPj4WMfVcDiYcy/oxsS8LXggqXiIVpQ/m/Jx5BN  
CTi+tEE31FIXlExSuvdsScAjWcm7BSv1ITlCoXaHTgLOLgloWSBoCHoleVcd  
tyZgunFL+eb1xrD/owbbxjgBFy00dzKX2Ab9629FbTNLwAyyL2mo1hRlu8z8  
dCwSkGxV8u8dCaA64yFlo00C/iWnHTavM4eNz2hbFukJWGi8P3CcgZC2tEdJ  
mpaAPwJTVrlusgBh+12iYs7EeQxUPljesYClc++/zbsloLr2zLCuiSW8qw19  
9WN7At4a+Lo2o9gSXH5NN33yTsBLj4crP4hbWQOd06VDvgl407LyRppqPFWgf

EMno8U/AjsOoufqiFVvy6xj7bFpSAT72jUve2WoHE25X7Gw4koNIIWq3xpBwC  
lM9xqz6UgBXXPSxCllnDF3c1KI1IQI2OBJMAdWvw4pRvzItKwBLf+fpYS2to  
aTGSzDyRgFtPJlxq7rAGY+EHS+wzCfjAaKbp0UFRKDAnjcTFJqBrqVJEWbw1  
rIx+2n48IQHHfrSJUXOtgV6543YYMwHPqjzP+nffGn6Ov83Zy0lARXdh6y2j  
1uC/KZjkh5KAz46K2fxaZgPP9kwdds1IQNFgQakZUxuwzI72IWUR+n37Vala  
bANrpZO0t+YIYlinUr/WQxtg06RXby4g+FgwVSL/3Qbm4y8sVL6egDd6RXo9  
lW3h9Vxxj3hlAhrlmVe9O2ULFEP9+4LVBB5/oVLrUluoCastnLmbgNNjTjH/  
n78z3redGGIMwJXL2+QqgJhfld0D+x8n4La7DreuhthBpNeAY1drAt4JfHZ7  
JtMORIMdjB91JuDzCD2PvY/swK3r67raZwnYZWf/qHTCDhoXR4rfeJmA3yw+  
mzFl7UHXZv5n/qsEjH74c6rWxB5yTtPFXHyTgNf0LeTnvexhWY3EE/67BGz7  
du2LeLQ9NIcOTdt8SMCFby5cnuPZw5n1N1RmPiXghQdcs5sF9mDcG+NSNJ6A  
7pLOIvM19jDFdD/jPZWAPiytbRMt9lBssbFUyprY3+Hey//67MF/eubV/d8j  
yPOM/xz+3h4Ui1vEDv9NwlbrEnHmU/bQszvLcMOCRBRwfx1jZM4e2DKhAS+F  
ErHT4WjM6UXE/PzEnJ8omohleYHCW5aRQOCU5INt4omotEPHbvFKetzRfTf+  
dVki5h7a5amvRILwD5UKOdKJWDMRYd2sQgL1LDrZZWUijvT/UXinToIsYfVr  
VUqJaEzRPCNIQAL3mj/PgtYlovXgqt/a20ggcbB9gbxqlg4Ef62XQhKc6T3k  
c3pLlh7qFQ2IIPHAONkySUcnEW2/au5WcyDBlIXMnXf6ibhnz+++7y4k2FN8  
W8beNBE3vTKM2+pDAgXfRMtZ80QsX87ofOlHgucyXoeuWyXi1mVmHV+DSGB7  
ar51OSUR9yfeYd6IIPa628T07UjE+j2+MhF8ErwTXlmR5JOIRdumchsyCfw1  
Y4Nm/yXi5cQTzzRyCbwqTJPcoESMuFdhcriCBI97fYLcDiSikVXUgt13CPzj  
WmmLDiXi04hQRtwDEnyb7v4WfDQRqauUF+Z2k6CoOG+N4vFEIFX7fS7/FQn8  
fCNpnacS8ZSC0eiiUQLvk1WFevREXDiuHDY1Q4LkU597RhOJe0+YOmshGWz1  
6oQykgI+/ll/5EqQoTrL13cuJRF9ajYmeKiSlcxZl1WakYiNj+7MCemRQX2R

UK1vViL+l7I2hYLEfHQwf+XDK4m44s9Vyn1vMpy2HO9IvpGizO6mvGMXyGD0  
696ceRWhP03ummIxGSaLuepTdxJR1Dvf8nwNGfxWbKV7PEjEasH0ppleAs/Y  
cbM1XYT+m1K2xEhR4JTKfPXa54l4fkDGT0OZArd8z+iv603ElyoK+T5aFFDp  
i928YSgRP3CEY3TIFPBaIZKvOpKIwXZLiu57UIDnnLhObYzIXzm4oMKPAgta  
kldtnkzENS+3+rOiiHlw0fJUjR+J+ElxYH7vOQocsuQt15xJxl9w/tPxJArk  
n5Jhas0l4nfBEwfv8ykwWJMmoiPAwHe66S82X6CA7C+5GF0hBqamz/IXXqYA  
Te/CvJ4oA4d+1wU45VMg9qBi9FZxBrp77S4TId4jtcWXfosZ+CyHWn5C8sp  
800DcpiRDPF93anPljcpsFkl74uxHAOjqzt9H9yiEHqqBm1TYKDrMfwafZsC  
mVkf70zXMvCGVklkfmKefdqrvtUGLhpya5hFhGLrijpN1djIG3bMdm3xHp0  
1vKw0GBg2QRnxqeKAkeTK55aajNwxNM7dEElBUqf6NGs9Rl4+grP5zGB571w  
VbONEQOXC34uLibwKloaWduZMLDzioJ5EXEet1M19+yRgfuRBufqifMya0y3  
ka0Z6Ll/rGU0kwKN0/VVFHsGJn6bZK0m+JrVtdClURmYElWmuYNBAd2DjSUO  
TgxcP2KffEMBYKLbTY5uTHwiN3mjHdHKHD5w+M85+0MjBr32LlxmAK968lr  
Xb0ZeMltxVZ/Hwos92274ObLwGOfiqlpjhSwy3JY6eHPwMsKG/VqkPBLbxfP  
M4iBVwfGfrRoU+Cr04vEnYcYeLBz/fSABOGXZE9h7wgG1nTfvcL4SwbvJ31n  
fKIYOC5J0Vr6hQwtFoNHfc8w8N63BZqPm8lQoPshIJDDwKmfNz8e0UeGN6H7  
3u5NYeCj9LFrRmFkkC3+7L0vg4E3u44NGPqSIW79pOuBHIKfW/5Ca8zJULs7  
vDMkj4HC1ekX1mqR4ceFH+SDBQwk/+v7zV1D+F/mt0V40cG/mPmOXwvIk0l0  
v05wJQN1129bIPyDBE+Zf420VBP8a/2uu/WeBKJPTldG1jLwWe+on2w/CVBY  
UDvqPgPjWkMa9TpIcNQitvhYE6H3jb83Vjf+///JRRuPNxP4jAWFe6tJoDi9  
W0lUFwP/fBMfs7hGgp2Lfg8deM7AgNe/j3ReJEGG7IcrXr0MvG5crvE2lQQv  
VF8Ekl8zMFfvU0MciwRSho2bjlclF/z4b6l1ngROdhVfNo4wsDHvaVDDWaK/  
eF4qkx1jIOPg99Gjj0jQsjc5XPgLA7VPnVX8c5TAH3V8648JBp6b3fpoZwTR



PxP2zQx/J/wq0Zp2NYwEMRmed5/+YuCud7M2nw6S4H6Bzan7fxh49spphiER  
z1frWZT9Y2BMLR8FhGbPIEWyl6YhDrMQ6WqxPfH+pY9Zook4XZR5z+jh0lQ  
9fFv4vElSdgoe7B6jNj/x+/P10BlSWj1NjbL7CQJdBf3L9shnYSXudRd32NI  
cHB1c7fdyiQsdD5TKcckwXX1qlQD+STcROl3ryX4+GSSt33DmiT8li/z+0sO  
CdQoPHmZ9UnYxv3odqeEBAFeZwYFNybhWV3ptdq1JMjdH3r5m3oSDt+kSPq2  
kWDouLf/kGYS3jOnvfEcJIESk7yxUzcj3/57iqpTJPDKMvpUZ5CEy5VSsvSJ  
kCHjumrJdZMkVGyinT9L+KWnVubQBUjCV/J3/m42JoNMu6AewzIjPw5XR/c  
yOA8MPkzyjYJ6fHjzY3hZGj723bcwyEj5YNC668RYbFEnfBxiUJWV0lN4r7  
yGcNVLhA3yMjPycT/S4IUKAB4ulldyVhh7N+i5o7BapPm/HbQpJw5s6o/K3l  
Vjhmb/a4G0bkC/mos96KCno5q1YVHUIcJap3xHgkFUrv/8yOP0nwHcgyPTtM  
hbWfPuwWyUnYJ6Ug3tdMg2HjrBAdLsGvMvd2mLADrFnH0F6bmoTfpQ4v0bFy  
gEzLwKq/WUn4JupEsGiDA3BilBqqryfhSdeLhl5tjnBcmN2n2ZaEsQWfHdoX  
OYmg59FQX2cSXm0p2Kyq7gyM1fMfYp8l4a5k+dlOmjNkaIVM9/cnYUqJkM+S  
NGeo2kGRjv+YhAX75J4+2+QCMHJute7XJOy+eusdOrrAw9Aa5YFJ4ryuo8LJ  
ES7wPGaTtt5MEkpc1/KOrneBbyUitDeLmHi56VJNBc0VoozM3RiLmdh9J4i2  
5pArCDRGem2VYKLiRPi/V1xi/u4d3Ze0gomuEZFds92ukOanGGawiomsMOFf  
RIPEvP7VLeqtAhOdxBZQTy0n5nnBjrqhChNF9uzj9JDcoJL5J3l4IxONu/fH  
P/R3g20r9VKTnzMxzGBR7eFTbtBwOTjLSIuJ7oELdTvT3ICskXvlnS4TGUaa  
Xx+WuMHTqr4ilgET82Kcv9k0usF2C8kbxiZMtFcysjR76QZDrfZ3RsyYKP/m  
+rvzH91gr8eZ+2wLJt7liu4jzbrB+NDtxyY2TKzYcmDjNjF3iNw/0TFqz8Ta  
IOpTL1l3+PtTtYdDZWKwyvv+88ruEHtm18A2JybuNhSyf6fuDuJL0kbeuzLR  
NCpMQVXXHfip7Z+5nkvMqpvxcj0h9Vrhh+bejFRedB/sZOJO+QWmc5+2EXk  
Kz+zWXqbO6hvJvJA92Oi7JKVjHG7lBxr1gUApn4qGnq+YWt7mBEfrfs4z4m

ylUO+ptpucP956tXpoQwsbDsauROVXew2+2iZB5G6MGSkni72h06PiZu+BTB  
RGnVSc174u7gEfFAIzWKiesdxAaG/7jBwPyMHP5g4rIVNvF+Y27gn6i97fNp  
Jv64IthY100GX6SDLNNimHhkfdF7Xo0bHM6+RLKIZyLphQQ3K8cNZtVeOn1h  
EP449KDXLNYNzt2U2J7OYmLxk03elwLcQAxsd1vymFj28ffyOms3kHO9FZJx  
nom+V86PKsy5Qs7Alwiri0yMdmyf9HjuChuDVE6M5zDxwAdtIbMiVzA4yWdY  
FxD6/nNc/dfBFepEWrkTxUzU4R0U7VR0BWue4PnMMgL/1vgXpp9cwDU/LH+y  
ionfugPfvTruAtvv7Jj7VMPEmvAJ88ltLrCr1cJ5tj7gP0TXWfm3MwRPSP7p  
e8REwWXHfjYF080hBb00z1uY+C/WxmTLGmellB706+gg/DDlk36xywnOGd5w  
aOxhopGL0PxZdSdIIGVequetn4toNVeEvrzoCy+vcz01BJtp0Kr3lThL1fdol  
9/p7Js72WR/gHaZBxeOpn6nTTEzZ3V9yWZMMVX39ZM4sE482eLoxaSSo/dxw  
iTHPxJKGnjNLAon5ZhmfdHpRMra8mNPNjrGFIU+9i0GyyahT6iNtfMYSlo0d  
tt5mklw7382nL7fQB5lZr/NbTZlxe+7YulvqurBa3HpcC5LRPvpqZcNKbVDV  
lslQsU1GxtTc/qR/GwGiKj8v9UjGtt3G03ixy8GakYWi05Mxx1na3GN+AZCz  
YlMFdyXjmcfrLN9R+8087ruZ/wpIxiuMuojINV7d5umfNuXjK/TZ+fIVtL1  
fiMqHz+HJONgb+/3+rZV9SGiP3lDR5LxXsnL1gHJ9fXhqwc+9B9Lxobfft4/  
f2yoj9J4aPriZDJWv1hU+vymWv0pKOF2nk3GQz0tPlepm+tjnVLFp4lLxlPc  
klFu3ZZ6ht/JbU2JyWjUMXbVV1C7nhMRwklPTsYDjySHtZbr1KfRaaPV3GRU  
mdshQhHRrc/K2GpyMzUZN5nYjDx6r1ufW6TILjmfjBYUT7vqEr36glrhkfyL  
yVhG8cn84KBfX9rx1Sj3cjK6dmZ4LbijX1859CI562oyhvXqVv14r19fM1U3  
nFaYjLtCPzvcfKZff1/omiG3JBIDM861aEbr1z+SZTGTKpjx2qe6ffsLvfpW  
tci3cbeSMeUR9e+6Id361bfyo03vJGNm+tV+s1Kd+mCLPunvtckoQvIwb9mi  
XV/Tvrik8H4ynlMQSvO4pVG/eKeprW9TMjbpZ5gk/KdWv/N9yBvZ5mSUScgr  
nvBcX18UfimqvTUZt1ecyH4YKF9PThlsNnlG6MfR7aqqHK/LXKlv/a0nGXuT

h5o27RCAT1cCBvL7k1Hu1S/pKF0ZSKxtXrZiOBm1RI+jzpcN0Gs/W9A6Suzv  
O2pfmbMZ1F5stjz3MRmL1l+YbGZrQ/NXVsTEZDI mjUa0luRuBbno+0uv/UjG  
vtsn2XvGDCFo0dQ17xnCb71qix79MoZq3nqUnktGptQYjdK/DUTWuPc9+ZeM  
1+Wybz7MNQOPYnr4mYUs5GU4/zV0ModrhtVLDEVY+Gtlk3/jIYTpxo95Xxez  
8HHdHq9WdQuwdZKHPAkWejNbdK69sIC019SX06VYuNNlm+GjQ5bwPujUIUIZ  
FvoNztRc/GMJBJ/LxJpXsXDIPxvxS0esIO7s29xTiiwUigmiNh20gudLpU23  
KrNw3CjTbUzfglQyrV98VmFhwoTqJ5lj1hChGhmaq0bEpul/XYusoelGvsgO  
DRZmmjxpqeu0Bhnzvpxl2ixs+LqnJGpcGvxbF5s80mNhYo3xug2iNIDpafrs  
hCELI4UVr11RtlGFlyEH9LaxcIne0C03bRtwOXRJ+B0w8EW+e0eUHQ3kznVl  
51iy0LfZ8YCTiw1MJQgaedqyUPN3jriCvw1YrtB/upRM8JEtr6EQZQ08ywHB  
TTQW3ITk2XHZNjC8JX3hcWcWRvX3vLpbbAO6Nc1ZOu4szDauDXjdbgPnbGe3  
jm1noV3RXEDFtA10d2/uzPZm4dS/LbQyZVtYt9snyN2X4GOqix1Ns4UHR+9n  
Nuxl4ZmeB09Y+bawXGhK79h+Fk72mfCGX9iCL2d9u9ZBFh70Ob59lbAdCBTS  
/2VFstAyy+iMTaAdYD/V/2gcC+Mi2Lfb9eyBE3jq75ZEFvbplrgc32sPQ1NI  
aSNMFrb1rhV8et4eTi+RfuKcwkKVeYdrlr/toSPd2k80g4UDEhqXHm4g3o8q  
kX/qL7Dw3aa8ynpHEoS56ccucTCZ+nNQW8jSVBv2rdF4woLPS4Xmb3NJIHM  
xUiJrmss7NW9cbanhgTBf6UnDhcR5w2NyjN4Sby3fSo6V5aysPKwV9qdCRLI  
1juU361g4ZcPV30+CJHhgNIXzu5bLLQa88MdcMroOJUytvAOC9eXP1mtqk4G  
uTeqLvm1LCza12Z4yIQMleZNupT7LJwAn0tuJGL9pf+kJxpZKLUzdMekB7Fe  
4N933mMW6o1+C/HdQ4ZQ36znBq0sDF7cP/IglAxN941v9XewsPu73COdY2RY  
rfwy9VQ34b/WnFXtxDx26GxE5LoeFubf3f0hPlkMCpZlhsEDLHsa2X2p/gIZ  
wnOpchJvWfjH5cTXJVfi0Cz4aaZihIW/gcT6U0iGiEaVmt+fCf5c446r3Sbm  
v/UNmRcnWEh+UKt8vo4Ma2N3H7f4zsIZ+60dUk1kaLXONE2cZeE67eiv8U+J

368aKm6ZZ6Hcc4maql4yRAq/+Nu1gl1U+SPoPkSGdY+W3ZMTY+Pl8XGh2Uky  
RNvFWRSsZOOrEYXujVIU6Mpft44qz0a/Gvaz8NUUUBW9LzipxEbD0EXC3eso  
0N0822ioysYlH1bf/KlHAbVNGXmvNrFRba9tcocpMe8mbo07vYWN3du4LiM2  
FNhEPmT7WJ+NC3fk7JjYTvxtHTjfiM2FnpPzcz4UeD54mKRZaZslN98GoJC  
KHCmdbTZw4qNGdn+R3NiKNCzOaZw1paNDfPk5pNsCmgw1zKyyWz8fik++uMF  
Yh6nelHe07MxT35NfUoVBTRLZjYz3NloXSFSMtZEgdilaeKaOwh88/9Vf39G  
Ae2OrvYjvmc0Yt/4/mDAgmOtk7CB9nI3uCy+7MpFQbL3mkXhrPRaSJtt54j  
FfSXn5WkRbJRnObX4f4fFYa67nannGTj6+aym2JxVDB00XFXybLxwtDqBsoT  
KoibnI5ZyWGjprX9tuF+Yr1ye8XiFDZySEdL/32mQsK3IilvF9h4YqKEdE2c  
Bt59VaYjl4h8wWterFaggc4Dof0vr7DxvImg8ld1GvRzch7XFbOx7Jjd41lb  
GpRGjf8sLyPyiVFPaLnSIMbXVCXvJhtzzyuldxNg+32Djf022y0nRlyVAqm  
gYZ27xnGXTZ+pqzPlkfQQEBOtezkPTbORYtlM0/S4MW/wwOHGtn4/sCB8b44  
GhR9eLDE/zEbpZctMFdLpsGpzmUmnq1sfGjCbo3j08Dltk8QuZPww7/QziXn  
abDxUnGa2TM2XgkxV1VepMEc/XeT9ks2MkpXNUVfpkFXqN339a/YyJMx3LY9  
jwZ5HqnKK9+wkdSzflfdNRpEwTvHxe/YaKXTFW6ZTwOqqs6pv+/ZKLSn+44V  
EStLnL4++YmNboV5kTbE+umfbf3vxtnltrD/akHkaxlYLFzyio179s3v1iP2  
y34YZNgyzUafXXlSMgSe8JKqgLpZ4jy7NtoPptPALlUopXyejXLXyq2YXBqw  
YNNb5wUcXBCxz16OQeDRdYqiLORggPDx8yf00sBP9egyG2EOvkiXiL55lMC3  
OvsaiHDwfrBty+0DNDCQeGhmJMZBjSrf6b0+NFgr+OW5zhIOmtaFyUkQ+iyZ  
ljqweSkHc+4W9rhbE/g/Gi/cslyDP8d1Ilz1aTA04JupJMnBlyl6+gvW06Dy  
YWmz5Ari+yM60/vmqJB958XuJSs5KHxitv7jB8I/JXPTQqs4WHOHkiv5jAre  
qeQNMwocHOx7Kc8roIjwwPuzgyocFCxv8R9ypsLk9qWrelU5+C3GIGsz4e9+  
qn75UzUORn/4XsRWJeZj/XODTRocTPsrfb3/DwUy1AqP1GtycLuAY/vAewqc

U+gSr9bmoIgec71uNwU8hJS2FetzkNFc17aoiAI4Y92dZ8BB1nGGw5U0Cqh/  
2b8v24iDr+ff9jwh6vffszvpXFM0lsl2X/60mwKfHg9pJgEH/f9MzS5wJOr/  
rsijWORgq9NR61dAgYIr7j+OWnPwx9edi8SVKXDb7XKJoy0HY6W5a7RkKPBI  
+GvgRns00mzQp18XocDI3ti+HgoHe1Y70CYnyPBdrotXSuPgFDtlz4sRMgi2  
yFPpjgQ/4m9lnPvJoKxxs36rKwf7cXm16TEZtAfmjy51J/Ilzni01pMBWWSd  
UQ80kueCBd2J/utonvapidjsH4/yCJQrKybBr8u2VIJ0cLl0d7PlaRNwnl7f4  
HPDmYNDmsqqt18hwwuWYrPUuDh5c0yTKziVD0sKHnfK+HAzZJKwmlkOGzMrI  
id//I/SU2nnwZjYZCg08LVv3cHBpbpHxRSKuli34kxvw/3jw7YtLxP3w+Htl  
9F40NvQPNBwg8r2MMg912Ufgl+EYhhH7vd+UtFF9PweFVg1kThWTYbq/Z2hB  
CMFf2XU7gZtkEGauy+wL5aBL7vuMwrtrkkDELda04xMHO6vCPfx+SYf34HfHE  
cA4q1BqliHeTQfeS8CPfCA5+iFj7Y+QNGSycnE8bRXLwTbGkfxrBr9OCi0bL  
ozhYuekHaC+gw04bY98+H00gz02yNw8IfUL36Bff007oraBxeac60e9lzvin  
n+Sg5XrnQTFLCiQ/bFU8ejqDfvxFU4NeFMiKXPnS9iwHW7bqG348SoHrG/dw  
lGI4aPLsgagR4ae7vaWk6Vjie/30B/1Ef29JnBXsoHPwknJW7VAfBfpMbGuv  
JhD161/ttuMfBcY+c4+cZHBQrunZiOtGKixy2DSmweLglToB765TVFjxL+Ky  
EleDvIAB+cMIVFApv7/zNZedkhtulFcNUMFKant7UioHz3QtCllqRYMzPfQb  
n7I40LemoiZirQOw47v3N2Rzsk819/p5LwfiNlLakJnDwYSdUheMMxygNvNW  
OimPgwKLNm++XOEIv3eNnCgo5uCBcfdTCyWdIPyDhV1gDQddhyvOipo5A740  
yA+oJfrN5XinB0H0sOxpokhAPeGnOPnVGqnOcL3m6eM9DUR9ZrSzl0w6w2jy  
f/b/tXDw6o/EqxdLiPlZ/yzJu5+DA3YX9Q9auYHqpquFXq85mCT4kNkb6QY/  
FZ+IeQ1yUPEVrepjoRvwRCRbdgxx0L7g7kWuhDu09eeQPT9xMHhR6qX+Dnfl  
7Gwq8vjCwSpBV/+AOXfy1zS22G0cwJP7zqRSzQMWIWq3uk1xcBfrlpnGSQ94  
nuu22e0HBxeZSkcrXPWA3PSojNdpDtY7nhjb1eoB5mfvU1xmOah7oPB4kJQn

SESOFDvPcZDak1g+resJr4NFxZ3nOai2r9QwwNkTinZrHHAS4GK8+4bz6SGe  
EOXm10YoyMvVbXPeYfGeYEuK0HAU4iL7r+WSnmXPWAEZTIdFXLyyepFG4U1P  
NGGt/UIT5ejvVze7joeecGPjEJW2mIsm/dtG1V54whkFoRKqOBfXDbYkZ731  
BEJtaVUCS7u4Sx7Iv7ZE5QUUUMoy7IYoCy3xuebJ3yZPdhOluLi5YaplWE/  
PKFmgr+FLMPFBXkl2zSIOHHkdjJlotHpz2kwic9YXvfq6/2cly88WlurvepH  
T1Dt+EezX83FfRXEw2TQE340rC+1U+Ai6fhRub2dntB4207CTomLq7NvLH1e  
6wm86/tDbddyMbB3ZFIo3xN8L7M7bNZxMfv+t5GLE/QLupaaPCxYqVHmUj  
YZ4wx3jjslbiYmY2a8VpF09oOf1n3EqNix6ycgPdWp5wPmKNo5U6F1vMD7a+  
EPOEoH1WZZYaXFz4evm1k0MeYLBz7zJLTS7KXD+me/+mBwi5Jh2000bi8CFV  
A36MB3TbIXWiLhcPfoZHfnH0gBzTZ1qoz8Wi13DngZwHHNT5xTY34GK0cF6j  
6KA7iMub04EJF7UFOTaNPu4g0B7fLW/KxUcD7ctfK7jD91NdbR/NuCgbILK2  
utcN+of/21FpwcVBcmpNhq0btKcUveJacfEe/+9F5owr3Lf97nPQhou13olH  
1uW7Qn5Rrj86iYveVnoVUrMukOndPijC4elhSkCId7YLSrCRk945Sufg1f7hd  
1dwFlsLz9+c4EXj1PmxWiHQGS5OWCNntXHR/7L0TwxzB4lvUr+87uPj93pU7  
S844wKZsr2NPvYjK9euc42nwXLBryeZu7m421D8oPRpCgw8WRYvuJeL15LZ  
cn+k7aDr+HaxoSAuigg/Vs+esIGmLZeT6oK5uFc7M1Ku3RqKuLqcqFAubhhd  
d00h1xKidrifHz/CxQuTel320BQOLMmWbzvKRa2MLzjbawK7695fLDzGRd+r  
lX+YgsbgclBrbfxxLqZWmVBdrQ3BVjkq1/8kF/8LXluQmbMVjJ/dV7E8zcXP  
/4nEla/SB404sfw1Z7l4axt3+3CFLqw1dNn09xwXY9J2Z5zcrwPSHzOL+205  
qCgtU9Nprw2LLrzbUk3nYkROTiA1QxNmqrRlqQmEf/v2f8+a0ICv8xG6hxlC  
5Ei1C2tkbYah8rpKjyYXxxJEELNy1eG53yJDTRYXtx/fFRQmog6PZRzvLOEQ  
+DetYPt0boKaR+nbPnKj+Gno2Pf5TcT7dajuEZ+LWTdKd3dmqsNI9U2Yl8pF  
2yVyQ4z8zZDyOqzhhDoXg1ePuz3YtAUSWDXWu89zUXRtROFSVS04jgsfm17g

4v7rkf5xXdoQOkUhrb7IRcdzDp2Fjrrgl5fS+iubqCfdd4wHUvrg7jFAe5FD  
1M0OHvHVCgZgZL6radSOXi+SMJy0CoUZgWhPqwsnj4mv2LpPGxdtA68Dt5yHX  
/u9vg6elP8xgnZKAJ6WAI9XLos+JpiPIbtn3qRUR9TR34eoFb0sQO8f1WnSd  
izsXdjMNqdYwp9c/8K6Eiy6+q6sHA23hXfr+4ewKon6vt3GnCsJQrxcsevgm  
F1OSKkVGcqnQ1RmkaXeLiwHmW2ySCP892r/XTf42F/tzJXv2KDpBrUhg9EQ1  
F+nJFo6mo05w44p/TmMNF/9cVLgHKc5QaL7nUXotFx9Kne/pV3WBnFf/fdlf  
z8X6TSW2Z867QNpRXym8T9S7suP97DEXYErVnpJp40JawyM/ri53hZgyn11j  
jVxc+qjtkHCFalp3rG1D7n4ouBheeFPFzj0YWcR5zEXF620TlvS5QKBMTu6  
/J8QeK777U+65AI+a7ZPG7Vycf208WRrgAu43fVQWNrOxQ9nhkcOqrgA2dPd  
8m0H4c++CLHVA8R999016FYXF/8liymFcj3BkO3CSuzm4uim08NLRjxB5bFj  
v04PFzNorSdu5znB6j00Aot6uWgzsatbbLsTLP9HVe3v4+LQs8boeQkn+GtA  
Dj838P/6ibVTEHGEH932GR5vuLhx8v3pg7E08CnUrl79LRfnfjGGtRc7wNBI  
25H5YeL8Cw/ZOWfSoOea9eJnl4ReAan0BwY0aL000s5/z0WH8Nmj4W+p0Dho  
4XF8jKiHk9nf3bKoUBONJxw/cTHs1Zmn0/ZRoVzWPHf9F8Jfb3i+hpGpc02G  
WfOvr1ycf/1XmmVBhYsOpuOtE1zseGgaPuNAhZRPjjI534j6dPeXuB5ABQbd  
2CTi03E/uGQ/TzpLhTPrjHztfxL7jxls03KZCkfrDegKv7jYbRVdbdNEBf9p  
ve6mWS52zul0SUrQYCdPdyZjjoszN8CzWZcGzpo6SiHzXFQZUu145U4D+xYt  
awsBHqaWGxRviqQBBGoGrxAkYqcafzaPBvqCWzgfF/KQ++XvoU+FNFDp3lxV  
J8zD24FVKZ13iXnGRP01V4SHr1ONfvm30mBlj5pgoBgPf8tzWqZ7aSARvlHN  
ZAKPjFRhp2CEBkISqg4SS3nYssrX7dcXGswWqkQMS/BwTGTTs74pGkzarM+s  
Ws7Dx8ZBrjk/afD+rfj9hhQPMz/Z3BEi4oGTa9/vkiHwuH8auz9Jg+er1ojr  
yflw7a2Tj1hJxLx3S1FXRI6HjbZqBmqvaXDfWWH7q1U8DLKSUrAj8N3+uVpU  
mTwPWYdyGXuriHlZg1yL5xoCn6q03I9EGmQ+kj3crMxDPUI1ss9hGnB9VsgK

rOchL50rJeRDzLupUn4Fqjw8XpjieplgU//IR808NR4e9U0VjlSkwSe3+38u  
qfNQx536MmIxDXL005svaPDwxyMv5cnfVHCXCU1N1+Th8p8Bpru+UGHxD2s/  
vjYPv5vWOWgNU+H+M3ktti4P1b+/OrumnwqRN6f+MPR5qNkRVw7EPKfBf9JM  
N+Bhsqu8a2I7FYbDc1LPGfHwhejft3+aqZDuctTvlAmh3+GkF7yHVKDqOmhF  
m/LQa9XGa+RGKghKbZg7Agy8eVq7bU0DFaq//WkOQx5u0RC9L0HEoU+7U0Ms  
eeiZjzErTaxXqSj022fNw/sheVObiXx9nDNaAbY8fCCUV+dE7Mc65Dnna8/D  
pYIjJaJtVLB20nziTeZhuAiH0tNjhVkt4bTtVB4e2iEdPkfgL1/22s/NgYcJ  
pvtoUy+pEDhxQ8vJiYdmP8d+Vb2ignxn4hzFhYcSzR8ZG98Q/a/U94mdGw/P  
/G5Yo0zwQ2cZpll58FC2o7XzzAgVTEML9phv56Ejw6ty/XsqTNFGtbbt5GFp  
+JP374m4YEvtIE3D+XDRtjXidhnKf+J7i4eNvv/qVhIxFJf96Vp+vJwgaw4  
TWeUCs1tuEfdj4dCXk0dG4n8p66v1Fb1J863uDuvj9hfnzk+pxzlw52/h02N  
ifr/tP/hE8UgHm76lydkTOC9RMlKWxVM1Me3h/taX1PBbfPhPSs08NAq/3vf  
cB+h9xKytmQoD0WmXzWE9RB6f1r7V/wQDy0rNXjB3YTeLb+eiIYT/qnm37pH  
6KtR1JEmFMFDqd76zD0E328Tr+4Ri0Thhk9eZfaEXmn7TmjPHeXhtSa5//67  
S+hNcv376xgP282uK0bcJPTepN7y/ThRn5sLXX4VEXqLLkifOMnDZQG9ITuI  
/hE69nLP59M8zLs3+Lo6jQrrm0u1P5zl4RvJ4KWiSVTozY/7OxzDwxkdtRBj  
Yj5ixXu3DMbxUGX60T7zQ4Tee/XS++N5WKD/45D4f4Tetov9exIjft6TPKc  
qBCwqPpvezIPY2o0x49uJvSKk9apS+WhE+V4/as3FJjy//S3Op2HZUx5qmg7  
BfKtH7RUnufh87C/i/1qKCAldND/+kWiXusYo09TKfDxXEv6has8NI7+zJRx  
pkDTmkf0I/lE/p99lmrE/Jhd++CIYyEPPx8Ija/Xo4DbdLXrwhIe4k7daxfl  
KKDJr7QcKcX6gbvBzz9LKCCmXa5zu5yoT4/EWhEBCtTvy1+2v5KHxUcfXnT5  
RIaMRVfmr4KKAQo5E/RlbDV7K/KlUTEjw1Unz+kgw0mPl65g7RD/qc1Ec6  
yaA2kNrafZfAf3SrxHAzGRZGc2uu1/GQoS3m9KKBDIOyyYX0ezxcZf5C8FIId



Mc/fTMjwfuUD4fyznofEdMvCdYuNNGnm4snSDwvVbZAJ9ejpS5iEPe6QUGXM3  
yGDPOB4w/oiHlzOQr1NBzOcbj7o1N/Pw0gPSXedyMsw3hlvltvDwz7KpuD1E  
30sbqnuijYcDwt8jQ4j1N//uU/bo4GHohkVSkcT8z8oMWK7dxcOXkyP9MVV  
CDL8759YNw/hk737xRoyWD73Hn/3jPAT/7PQk3tkUAzbPID3gocVB+khSx+R  
YWapW1v6S6KfCTyTCmsnQ3eR492wPqJeHjOiZl+QocSOUkR5xcNXtnvXlb8h  
Q8KI7fkNAwTeBetSMgh+/c5aJvwb5OGxYxHONdNkMFOCo31DxPm05QblhSgg  
d9c480Yw0Z8LH9U1ShF+8dzqnpjzCw10BxhHV6yjQ/kPbeu97HtI+bIoT0KdA  
AVdDz2KMhxsrnCNybSlwTlNtnfwnot5sgh/m7aSAT+t6yZ+fiX66Ycvc0kOE  
v4TlJwomeOh7rPRdSjYFvlyWHTz3jYeSIhlWRVUUEAxS7d7feagQrvlctpMC  
J6LEipf/4iFVC+weCFDhw+dfgVHzPHx/aOLmV+K+bkj47u4iwMdSadteh9NU  
yNowYa0hyEcNXcGS7AwquOx+v25ImI8PdeI39rRQobb7+aDdUj6eC2i5ZKBB  
g7SDXe3Ky/g4vtyVfsmKBmHibbV/lvPxYs/vLNZOGqjaNmaWyfCx+9/J1a10  
4n66U+GxUoGPe34Epjq+JO7nzLgvckp8rFPP3v/rEw2aonecW72Wj+u8WqQG  
/9JgZtuCUkUVPlrVvUm0XucAPIUXVmtU+fic6+mZqucAGn8L+taq8bFYtShI  
y9oBfOudhFU0+DjNSJ1/4+cAs9kqFzZo8tHVU+zlo0M0kHJ6RnujNh+bBpZe  
SD/pAJq+bY/UdIn9szgRjok00Iw53ur6fLwpdTo5ne8AfsorU5sN+ChX/2hZ  
epYDzC2wT9hixEdfRfcNynkOkDYsr6RlwkeBspUzikUOoNU4cVPbll/B3/5U  
HCKl8l1pJOkCH2X2TjxYXkHki01/o4d8DD/35lwPEc/57z+y1ZKPM+13vpaV  
E/lSzjCYWvNxZdP+D7ElDqCtKn3ZyJaPnu+Gz5sVOEDLog8GjvZ8/FEortWQ  
4wD+H2ratpH5mJnW0zWb5gDzj1l+ZlQ+Fm7ULOxkOEBGgd8MOPAx9ZXAsNoJ  
B9BNNGChEx+faZteHQ92gLZ9i1UsXfj44mq7gpinAwSSB+9Yuffx+Z3ccF90  
AIHNNxxtPAh8YwVdr1UdIHMJfdR203HeynbfQOL9qf9lx3H7nXzMypinjhL6  
tbdtkSR789FlxaZ7Fs00CCxZkE/Zxcf4Ap03e3JpIMB6YUrz5eP5rrUDeseI

90toYbeDHx+XiT95fZ5KvE8cTwY5+fPRu2/t4lMKNOjQcp53DuTj96oV7OYx  
KgQt35DiGkT4aVY++1sF4denbfc8DvBR+EL8TU8zKhjcyHHfHkrg99H2ufyP  
Al28iM87DvHxkbXCm+J7FBBYU1jpE8FHmtTlKjljCuzv2R+65wQf28+m338v  
SQah2+ZCAaf4qErjGbU1kCA7XToz8AwfcXu60sUwEnRvv/twXywf9eOS37  
xB5MXi1WPMTkox9n/vLcbjsQGypszPZHfXzvMU9A1xquFekJH8nm41pLw+u7  
HlmB5ZE6CMnho6jQKePO7VZwYvHTCp88PnbuXBhdFWUjk/oz6XCd8HN2Qbb6  
VYTkf2efGpTycfWp0rfeGgiqLUuWaJUTfjs3FJX5m4P/7jWn1lTykWswmrHs  
hBn0jtr6C9Ty8cpC3jfubWM44tZ1caa0j5Ltqf1L2oxAas30I5P3CDz7H+o+  
fGc11MoQ8ttGPp5NdAmcVTKAj6d+xfQ95OP8tjvKKutQCedrXv6ml8RG1m/  
jEP04d5ginZDKx+IJNqdm264F2oFFzTzsdZk97Na5bpwszhgis30vnIF/Yf  
+u2iA7pitbJXnvEx77qjouyoFnQ+s3G68IKPi5WCbeOzNeFAdmci/yXRX3j9  
bE7wFrim924u5hUfvzhITRyGzWA1f8DgxAAfy2ZjTFzs1WGoefpgxBs+RoXn  
SD4N2gQn+WcKD7wl6mnMlD2Vowardy1+5/+Ojy0szY7qbxvhtlqKgs8owWc6  
+eMG743g9l3Rw/0DHy23Bv7Z9IYVvtXls2kf+Vhz3mPN37OqwErQeWLzmdD7  
1+TB/eaqsNn1riB8Jfx+ZrFo4mpVaFa0MTWY40OGwCjB7TKqEDDWcUTzGx8H  
Xi2L7t+iCoI3t5epfif8L30tUSpIFS6dHB5T+snHClhOFWxSBVP7A+tW/iLy  
CfwsKLbcCL1S017LfvNxsVjLudTbjXBk4HSqyB8+bpcskpTMUgOpArHO3NE  
XG1QLBuxCUrD+aIz83x8Tc3y4e9TB4qZouWkQAoaHR4R/XViM4yJ5B8fE0xB  
/w655IpSDYjr1r41JJScbQusWnT/bYF1F2vGexel4FD5gZxPoVrgrdvx35PF  
KdgUP9U66KEDv+c8LzwQT8GZc1dMX4MupD1++/yORAp2nftwx81QD7q8f9oV  
Sf2vgiuPx6rrohXhbaCBjkiqMr4phNj2g8z38ZhDxvRmpihUkpSSRHUHSZIk  
UwqlzENppAwlaS4qjUkqUvr09+f63X0fs/Zea697zj8PjTqP12awbtoQohQX  
nyNJo8YDp+cP9uvAtGGx6ox5NLJz5n3e2LQGTA/IaCQvojG9KXPVrnB9EJG4

l+QjQ/js/3J86p21cJuN6VsjS6Nk35QQf01DsMnryuxdQmP2Zcu5ugsRxDX2  
j1YtpTHY5Ninq30IbVdWOx5dTU03BQ9s46p44NCcNh2UaQxK0ztsFGsCkpTR  
ZklVGgs1trRsCjKFroefmz6q0dg9o9Rfw3cduPVa7eBW0qi1x2P/5EBz8BWA  
2j+0htQn8f2vSp81LEsuN72lR+On7b/aXi4i97k5vtmn1tL4VHxl1oArHwIV  
6l2sjGj82Xt6t9Y0ATnvhpTL82gU/5jmMLrUDgY1ZSR+GtMY/bWi30+WHVYq  
vBvYakrjghCdPzxve9jCi7l51ozGkzee9a7/aA+r7igp7LCg0ck7Sm6rjwOM  
CLpiBVY0huZ3+jg3OkBF974nijakn8L13venOkK092rtPxSNjc9E2nNUHEH/  
w+u0Tlsa36VHb85UdYTFYwKDBXY0Bh5MNKwRdoS6n2Cxx4FGEfGA8NAGB9gT  
9/mssxPp37WZEa8DHMBYNPOvmguNR07Z0luLOIBwqpW7kCvRt+2PyuAJe7g5  
b6ziiRuNlvpGJu9QsYeDWefnXNpAo9KW+QOFNXZgpegcmuhJo7rYyl8xTnYw  
o0T47gZvGqtA2vDVmADua5cvX+1Lo5pyaXNXiQBSa33i//Gj8VR26oPIaAEI  
1s16/nITjWbbSw9spQtk9FKnW7GZxscSYnoVygJ46BhCHw4gfPPsmHf//z+F  
Z9JDvkE0WnxMz3T8bAvr/e5a64WQ+jeHqApabWHRQPR5iTAAH+md0p9ZaQvP  
IpSE3oUTvp256k8u2kLW+CPPmq00DuVN8p9cagveCfuqjkXSaLJCneqstgWF  
6avnBWyn0UfkbmmB7bQe+z1FqNoGmXVagPIB2whb1Faq9QOGmc5ly38LiIA  
/xxQHthJ3j9yr7N/gQBUVD7va4ql8WpS8hoLFQEMlJ58lR5H467jnQsC9QRw  
Qc/KICye6P9jn3WBqQBCG0e5dQk0/jux56yXlQBWWp7/Jr2f9Pt7/sg7CwEM  
tznZDifS+FXxxZwTIIDL64WLbh+kkUtMueeiKoDtr8pETh+isX3U10HbXAHo  
+vv4bjtM44n5SY7J32yhJqpuoUIa6Vdr08jdeFswNFknI3+MRn+tFpNIE1uo  
E2+RlaVpvBnsInRb1BaMeuyXyLA0esj4s7rtfGg492TponQal/dP9tbN4QNv  
i7figgwar3wKbXlHzhNNBu9XzMuksV7zUoifGx+a00fU52TTOFhQ0HxiHh/M  
Tu9c0SuHxhEq++jZnxTcDpyyWjyX9C+hRlXjGQWWOknaM/KI/ntPZfk2U3B3  
8izdafnE//vejARcpsC6ldUXK6QxvElFL6SQgpb0xYYixTSu3ia1ncmngPLL

NRlUoTHrEa9i+qX/nxDUjadconH8wXWjpEYKbMdLTSeV0ag87cmKpi4K2m7q  
mk+U0+iVXKDZNUCB3bF6y99XaNxwOvqlihAf0jzMbH5dpfHF0aSiZQv54KDC  
yh+tpDGnRE5KWYMPD0cc7H5U07iZt/v8KR4fnBt6HEZqSX3MB8/39nx4nOzj  
PFxP8M8zYUE+fFjv8mH9UCONK8s/z0wN5kOPQpj74HXy/lyJ0KsRfHAF/04x  
0Eyj9GV72aTtfHhWucv74y0a9UKkRNSi+OCxX2jjhs0Up+U3S3I8xeCQ5ve  
3SN5WlGs8Za87yUz27+3lUY3l6qjk8n59tV7LvDNA+J/pzAmn5zvfMplQ161  
E/31P1g938iHN7vPhb3opPH7Yd71XHc+bLRS2/rsEdm/i5MQJvx7pcojex7T  
+PuUKG+SOR82vdaL6n5C8jP4gn+WPh/eFTfEdD0leSF6jpmkzod+k/u7017S  
2Pfvzm1Ks0k+SjjFt72mcdLIJM140s+BnqcJ99+S+dyY0dvhBwUheb6JLX00  
HvQXzHzYT8Hglv6Dd98T/32UW7T2BQVhhuHJt/tpTOycqVHfScGQ2M+Um59o  
LJm+2li7S+4XD2PTbnymUWGXwORXEwXDp4WPN32h8c7MopVytRREBCUzDV9J  
Xlc11YIWUjCiMye97huNGdXDA9euULBtyomMmu80xoluuzG5nllfrXKnqn7S  
uDNksOAx8U/UibzT18Zo3FsjNGXlRXL/8FPPqRin8cB1V81JJRTsWHk59/If  
GnfbMzmGFygYH9c/X/aXRldt9/znxRTsutVYcGkygzNBUPmI4lljFsUlQgwe  
1l+oJU3Wx3k+KcmeyuCdMbfYswRPUneEuLRRlUMPk9V0f8vvx35+V5//DYPKF  
r0Vryf5TGjdW5E1ncl9fR4o84Zdw+0013JkMaj3c4z+llALh9VuqcyQYLpX/  
tbqT4MJXMq92z2Zwzswelx1lFAGcbgu7z2XQuyx1/BfBP75GKK+RYjC9XL3E  
ktSfuU0OP3c+g2VBHSLuBBsL3dv6ZQGDBdp0xlKCPyRv5+4tYnB7cPIER94/  
IqlQc16GQcmgtlvFZD+tU62vEmQZrGyq+7aH8OtZHjPVW55BUe1Zi80J/z0l  
y1QMFBh8OiqllUTqa6nfgTGynMHjIVZBwUUUbLVQSm9TYvDqojjFJWS+F7R3  
1BQrM/hqduS0p2S+N71RFtmkzmBjV2FiSB4FM4IeqfD+JftlD1dT5ygo+7bh  
drEmgzoXRByNcylYv0stcmwVg926RTNtz5L+C3enP9JisF7lfmsYuX/kpiTU  
luow+OT2G68zZyiwmvfvmxRdBm3VJML7sonfsnpEAvUZtAmNKTQkmFVKVDUz

YHD0vHl10WkKDC5pChSAwV3Dp/maBL/RfR45YcTglM35s9qyKDjYePBED4/B  
ctkDF5II1rDSqqswIXxX+bZ7EbzDPVk0zJzB/x6e8/Qn+GbwG4GSNdHDb16M  
GPm9408p24QoBm+OzztVQPCC3XoZL/kMxgfdR4sjfK6J9NVVCxj8HeJrd5Dw  
90xNe8vZMxhQO3qrgdQnvMBALNKRwfG5VxlF0o/C7PdQAmcGe1Wvq18l/RIo  
H7dTW8+gc72xUPh5Cn6WwnYxNwYTD7on8QsoyNL/mNHrzmAub/VqAdHH9DpT  
3+DB4NvcLxFbiV/THg6IxfgweMT+QqI48cOKnxkn+/0ZXJq/IcmjhuRvnFID  
cyCD7RI79srUUxApNtx7Jpj49VtB0XuSxw0LLTXcwgkfqW639FtEL4OfDXej  
GNy24sgNaTLvEzdy+vJiGHS859U18ojoRfGnJexkMLZ6S2lzN9HH85zD2jy  
PvhzqinJi6R4h3dFiQweCPVLDPtAwaqRyyW7DzJol1ksfZncR5/9Ny/K7hCD  
wIUfDZ6TvN//JMpo2WEGBU+EEz4MEn1snoj+TGHw3fTXiZ1DFDyu02+7k0r8  
vnHT65PDxL+amemZR4meX6NUjUYoUM794x12nEHr2xN/qr5T0DHPS9mYYXBo  
90XXGeT7tjOp4askx6ADMzl71SgFy34vqXqfzuA5uShvzTHSn9CEvVUZDP6q  
CX8v9Yvkezeteq5RMotf35Zd6CJZ3NjvrncXgM8n0tJhx8j28ef7pqmwGOzbe  
9hwgOELvn9ypOSRf1K8Nqf2mQKY4MLj7LINNVf4y2gQ3y7ZoFZ0jerg8vTpB  
1oceVf8Te57BjTazTyQQPF84tVlQwOCV3ulsLdmvYftQyti4vfAln15hF9A  
v53zj2IG3ZQc1+oS/nM2IMveKWFw7n+5qcEkv2vuS74/eYnkQ3idiyHpxybe  
9ouhZaSfr88G5H6lQPzy4yjeZQb15zidPEn6e01RDyUriL8NHzbJfKLA50SG  
2PurDJ7xUKhY8p6CaTN+t1VWEv1q0Dr3DQXluz1OHK5mcGfuyvVZzynY8LXO  
x6uWwUte38r+IfpP9ZNXWVXPoLvulc1X7RSUdMUPCzcyech6R4H0PQpcLN9W  
PW5isCdQb/jKdZKvNaYJhTclf1fHV/nVFBRo5FnH3mQwJcXCapD41/6MqKTg  
NtnPfr7IHuL/8bkBzxTuMig+3NjvQuYvN/Fu7vd7D06osLwXRpN5CUrRPvMA  
wZyu7y/NdlGQ/WLwT0g7yfObMvVjoSRP7AQ3sZPMh7DiSKc3yVeduS7vuhh8  
ebT3ah+PgnUFkXKV3WT9tszhWZrk+yfd9T65h8FlbWufWslRgJNPRGu+YPD7

LB3xjlEb6I/4hcKvyDwlHxee22sDx965//P4NYP9555PsrpvA733ZDN29ZH+  
vjLYGH/aBpLY30pbAwxq5k6TXL7Ghty/RfZIDDK4fNHZAwbSNvBs52abkCEG  
s5XvnM+asAYNH5Xnc0ZIHvz5FW593Ro6VC9NeIwzuPb+6dq9ptag/6Y/ZP0f  
Bl98PrSHL28NZ9OXPrf/S/ZXTJ3rOm4FkVO5anMhFivSjg5qX7QCqZex0ZrT  
WfT4qn/PRdwK1h+zHhaWZrHedc3OnGILaLDY7/NXhsVFS4b9zsRagPLfurYx  
WRbzSrROTuNbwK+gVRcHFVh8eyu4RfGzOZxctzC4W4XFuWcC3TuWmcOL0Xd9  
RfosQsHYgfd68DsorxTngGLF11yA50t18HFTW43soHFw6X5L3dJrom9Ha05  
jDGLnfXdmTLFprCk+LJXnBWLlheOrNB/awKHfAfvx9iw+Fq23lej3ASGF6yA  
SD6LHZ9iN6/cZwJN+0/KBNizaPulYaBa2QRUDB4lb3Rk8a6d/c7ICWM4Piw+  
7uHMIrX58FD6Q2Pw89r7xN6NxVNCUkUJ+42hRarGgtrAoktF+ES0tzFot3y/  
au7J4mhEqqOuoTFk7f1Xydib8O2I0noibQwiegGsgS+LC/1XLo/4zYPQLzlT  
1/ixuO9u/YXFL3nw+NyzSM3/WLyaquY0dJ0HuGFer6o/i1VUbM6UIh7kzxE4  
KAayeCTjmkwwzYNZd5Ka5INZXDyJz8p0Dw9i4q5rSoey6Kz7z+WcUB680f6T  
LRXO4torqi+zvHhgNaAza9ZWFu8scHAQOPCgLCc8bloki19G93P3LXmwyLVw  
UHg7i7mf7q7SNOHBXolej79RLL5MXFGcasSDT82LW8diWEz3PndoMsHRers8  
O3ayWL6/9ZELjwciF3q+FMaS5wcUnRPMeHBcXi8+IY7U83ajMsfngTzNzdkQ  
z+KB+Xohea48KBH9cVYrgdSf7Wp0YzMP1u501J65n/jttuOVtmge3B4su9mX  
yGKGR7rWgcM8cPadvb7uIluD1x7wv+Xw402jsH72EIs/GoNaI9TwINzy/o6w  
wyzKeT+PkevmwUSN2gyLiyw+3cEsHvvBg+SVyafk01gMHBPeW73AGBbk9muM  
HWXR4HpmeATRK2++RUP7cRZv1reWqW8yhoYJ4bd7ORZIB+tcntUaA3/rxkj3  
Eyw+H/SmPg4aw90+xqlaj1k8X+9Vo77UBH607F7Rl0X8ErZG7SBjAgn4vLI2  
m8UWmeH6a50mMOvyWms2h8XhNa3DdlKmoHpyNMQ8j8UXjvnuX3NM4Zq4y1+5  
fOL/5YeWzf5iCmZ7r6SNFrA4MklQ1gLrwDtga3nBBRanR1kbW/WvA3bNwOj0

KyxqlLgZNAeZw7Iiq009FSwWKlZoKXeZQ6lsgXTtNTKPfbsMU00toGXqfxBa  
w6Jph0QerW4JrjE3HpjVsbj3QW06lW8J7wYUf0QaWY7lNG4VskKJj98mdB2  
ncVl1blPP2pawxFzkCpoZnFTeblXc601yFRn5sXfYlFJ/YqRGN8GdHJc76y6  
RzDPQe/XTnLeCe8UZzpYxMGWFZGiAhh7q5kd8pDUW/BAa5GXABJd0jTNulhs  
yxbtM74mgDNAOf58QrB9ivntUDvomnHrhOtrFntMVIpcPtoDr6BqmewQi37m  
u7PU/3GGa6dFi9WHSX/zncPEdjrDStZxteEIWW/xrlruszPIJgzyNoySfGi4  
PC013QV+bVDwypjE4bffbfcFG6a6wxSHsXcEUDltrl0+3iLnBB8uakEphDqWu  
mB65E00GXTrOu7rFOPx4L1D0m5M7lM06dGLEbA4L/yxc7inkAcqij+UV53L4  
/tPeSvsgD8j+szRfW4rDtBl3nl5q94AjH2srHBdyqOC7XVz7hCdMfT0N/KQ5  
THZSaJt/5Qm7Hrs0Ryzm0HNUy2yyqxeMtObajMhxKFbYFlp5xQuCbnztPLaE  
Q81SKcUOUW94UwXuOU5PLckU0NlpTe4lSa/KV304SzbgyHRdt7Qfr47oFGJ  
w61pj690B3iDRdbyr23KHAoZHuj5L8ob6umt0a9UOewroksg2ht0kuv/flHn  
cK3WH+Fdgd5wIX7Ggb//cqisXndJ38YblkW7ikus4rDj88N9rLQ3nAzNY2S1  
OCzPiM13vuAFczZ9k9HQ4bBmaGLA7KcnJLljqEuh4NhbWkWy3vCJPsvUvUqf  
w1MdUcll2h4QZdFTtsGAw+Jj+pHqsAEGQUk/GDicUM4LHzJyh+eqjRbjxhzu  
a9700cLCFRwVxNsyTDn8XXvpWav7emhZ405SaMZhb+Qxnax4FzCRyH9RaUH0  
9Ess02xwhqqp3zfdseIwW1RM7NFiZ9D8zfvcbcMh/cT61owMJ8gfPhL5gc+h  
zT9nrHnKtiDX/3T8p4DDl06lkqp3HIF9uSJB1IHDqByFs+1RjjCza9u0+U4c  
KjV92mGw2hH2tTQdVXThsPZY6+KIMQcYb5JYqOPKoUvYPPHY2w6wtXJD9jp3  
DiXLJe/7ZDlA/8UCJScPDjFHNRarXTiAd96PEj8vDkNkJtVvdXGAx5kmOpE+  
HH64m2C4ao0D8l+n1SZs5PDxnpzheY5QHPSc9Pjzmzhcs8LCIParPRjsUWnJ  
2czh1Nq/Gbq37KF8e5RDWQCHPqnB1zsZe1AJudHTGMThNIYl3MnHHs5sn03b  
HsLhD7BZEqlmDwvcPPtfhRG/743z2D9mB2mCovChLRy2u28tenHXDkTNR3/+

jeBwwY2Oo49y7OB/d+sctA==

"[]},

{RGBColor[0.880722, 0.611041, 0.142051], AbsoluteThickness[1.6], Opacity[1.],  
LineBox[CompressedData["

1:eJwVIXk41AsXxxEpupRkK1tJlrhRjDXfYTKWLNmKq8iSss/EZF9+k12RbYgo  
inCLci1Dm+iG3ESXrrKkpLRlkl298/5xnvN8/jnP2b7nyHsE2XnzcHFxVXP  
/97g+4tvNGEuI6420qAly91oNONd7WfGsNH13V5SZLMhYjukT//J+GJ0ld42  
JiZghZ5xXYd0xqqRwB323mT2H0i7/bh2sy8Pah20klk+uqOGTieNSaxFvpb8  
kdZhT8zPPKZEMX7D0cKi19L2p3D0mf3uatZGNFYnJ7sO+6GELVQp6CsCmfFc  
L4p5INrC2b8PSohB7SJP5kNvGvoHhb4bTYtjaSVxXldOx3tdr4byx5J4JnfH  
XJx+GoJLQoYhDGn4vl3yt7MOxTYXL65XVrIIfKVe90CVAfHhobHLWXX4bdOj  
1PKTAWVDzWv8vtuBPTYOpKQwaH4ZWtviuAMHD3VJFRmGQ/9S0slAsgLmJ8s3  
OXwKh9XqkGq/hCly/UZvW6lHwulG0rlk3l2gJz8csmyPhNtRza/607tgonDy  
g5h9FGh3k26XPlaGXYusnLtrNCICNEWd6lSgmMouDH8RDab0c0j6ElWkSNmY  
FRyMQW60pm4wQw3iPhmuXIqxKFYbvrjDQx0ujvUCHamxKB9OWhmw+h3nGE+o  
hR9jMVQ8NVqctQeuq5Gi263j8HquLTNsnQZUuo8yTM7E4Z11AdkuRgP9O70E  
nYrjMPXTpIzPVxMFT+Q0bkzEYcZJ0mF0VBON4Z83ya6Lx/zNKV624168ebcx  
5NWueHC5FZzw]++DSt/0W6ZHPHgbA8VNG/ehSLWhOyc6HuuFKR2yalqYFcgd  
1WPFQ+T+IPJzCW3smHpUkPx3PMTE21/+eV4b/SLOV62H4rE1qCAtkZeEkOXx  
2fft8VCQpXzRnSYhZop9uVOMgNIZyeLNJ3QgnyvwTFWJgFrPIPWXVzqQOz7n  
mKNDQDu2oPbyY124CUmsveZEQO9F4PEIQz1sJhve9/AiYPQ7RcShTg8+2jW7  
D9EIUJik29SU9WE61P4+PjqA2ejUaf4Sfag3KMpPjBM4SGpXGBM1QKdwl1Zx  
NoFDGQX9zakG2HPU/ITVJQIuRhRSIMMQj3aKVo/UEFBPUinWmDNEz4CA9/0m



Ajw9G/l+h04HSy+KtviAwIDYvF/Tj/1Qi2x9n9NBoPrYcF9kqBH6AoZzCnoI  
xJW36Rr9MELqmVvbhQcIqMw72MbrAZuzmMyVVwREt3as8YwAbEakAk+OEfi5  
X7+R0gy0J+mFOU8Q+OBx01dxCQjfUJPF/5FAX6K8zDo9MlbHOvPeTBG4U5XT  
Oxl0xv3YcanEGQIVT/kTnrDJUJLmoTz6QSBrlkLnxiIZ63+6Cl5bIBAlNvXp  
vK4xrAs1rFSWCZzQO14SHG4MBS2nIOdVArbH/rWzYxvDp6mMrf2L02+Cunbf  
ojF4REaO/M3FhEJ5M3uLrgm+kb9t3sDDhFCXWsB8mAnW8AhcFFzDxOKXy3KD  
TSZlp4vHd3B4fJPov80LjmijXeE35WXiqVZSUPEOBW0+fs5JHG5yXtKLCaPg  
g2NbagaHS6MDptyaKCjlvY+zuH0K6+vkBcosFqSKfvFicd4ZO+4Q+cAXpy7  
PenPYffjv9fxhR1AvkvHpWpOPpa/6d2ZaDyAxMAqiXvcTGhr3AjqmD+AqJPp  
JeWc/OUc5XZUkUxRUr6J7MOpTyA8eyDtjClEpBp4eH4SmC1amxrQalrGmdMv  
wlYIjDwIN7SZN0XQgz7mP0sEOsY/T+8hUfEbS/UR9yKBS7ufH55toKL1eW0m  
MKffybamggNzVNTNCcl+5syDHsK+16htBkfdNI+b0wRM75TsjGwwg+bkScPJ  
Twt2vBYZdj0zQ0CtuovXJAEp3sT0/drm8KTny3Rx5v/V0v87d4M5xCT/5XHh  
7Ef+K53W5HoL8Mr75JX3EyB+VYf4/rBAVhZ1IquPgP80WaWDWpbGdtjQePs  
H9mPL0043hLvmw8q8ncS+LjU65r310FYHZ5lVbYQ0JfyWyirs0bjYqWmSQmB  
9jeh0+ZfrXHeaeRifyFHL9VxH76q2IBOrefzzCdwzCDvP/1SGxwiVfwIusCJ  
X+M+dMrMFpKZATNHmAS8etPucJMO4cBM0bWcEwSqtryJ0hC1h3zkVHG9KkfP  
xedXM586QWWd+NLoX/FIbMkYGJE+Bu11hn896I3Dx48268b5POHF556f2hOL  
JXLf1Db2CSS8bV9s0YhBqvhQQlmLL8Rr2j6tjEdB6zs7mVYdCMvSjsN1PyPg  
vSHIY6sqDQOL+1/KIIYjeGThA035NGK3Gr5Z1A9DUP/ODRS+UHijBXdb/GIg  
qsfgHfsFA8won0/J/4WiM5mVN9AbhjPK2S89K0Mg4FPjv6WKI9DUNXuPXTqN  
NF7BrcuVUeA1SGxWSqVD6ppt7NnLMWDwW8xeT6XBul6ZN18vDtW5nfjd14NR  
M9+9r1UnHvRT5LuU+CCKdj89s7yTQEiG5C32RAD44mcU1+9iokbcuiqA7A9+

kuCtkzvO4su9ZYFjzb5gxhJWg0IJeLXx1pEr7qdQUrHVSVooEVuOXTgQveoD  
LY/NNPpKlrRqL4mGtJ2AnQyXj+REEi6ZalSolXhDuFmoM/ttMr7x5rZV0L1g  
+iHSUPZZCpb16ye/nfSE9JyATMyzVHS7tRvvPuKBSL6MQfXuNHi/jyj+7nIc  
9hW0iumGdLytCq4Xi3THEyXGWEL9OagZm3ZlqrjhnsGg2u6y8wiYWxNhkX0U  
JDsNR4X0DEhXhgSVsrjiepnj7BlKJip+SebvzHYB/T2ZeqI5E4ojqYldes7Y  
sNXIdr/eBRh1nm1UHDyMtyy/N8W3LkCHfso96LITYnJFPK4rZqFO6XaET7Qj  
JokuVuG1LKiM7aTp2zngAvuWk/i2bFztWgquN7fH+teVT6KKshH48kENSc+O  
8w+2qadJ5UC8aSFh7/5DuHPmnuT2zBx81qm64+1mC94jtjZS4Vzwz/tZcf2w  
Rkq8/UR1Yi5GNWv37XW3Qp9q7c+jy7loSOigBr23xKdH0v8shuehSvC/mmVP  
C5ArmxVkpvpGwp5X9/vNHE0l/H+qzeRhxbiitoDfHHvyHPYazuYhJdMsvZPb  
HDLMKbLrQh7eSMrZqnF0v+S63e0iFwsXndy5+UbNcHtjaoHYJhYEuTe1z9aa  
QSHMWUhYkwVLTavC545mKAwsz5XZx4KLU+aD3bZmEPH+vk1dm4WgG4NaSRZ  
m  
4LI7p2qlx0KjMFUYRmYYVm01SzNmIXFSKLRVyQx5o0pMfnsW6uV803hWOHds  
IFRA3JGFhVncGcu3W2++EFxcMs907ajvZ6mgo62/XygT9YGPjzzHj4jgrr  
7My7TE8Wsnc/XMrroeJRyjAl25uFvmURK+EuKgziVLpLfVgwllD7kNx0hUpA  
+8tWPxZMEtLmY9lUXPHc5NEbwIKBP8lvtY4KCZdjK6+DOPWVRipG3aQi07Y6  
eJrGwrzABuWV61TwUxfmf51m4Z+UInp0GRX/AxdA11s=  
"}],

{RGBColor[0.560181, 0.691569, 0.194885], AbsoluteThickness[1.6], Opacity[1.],  
LineBox[CompressedData["

1:eJwV0Xk41IseBvB5epoICV1ZGipLQnQskWXMqzPpdDvWmMqV7rGnK4aMkpM1  
Y82W+WWf+WkwtDpXLSXJSZRshxliOelIdSzZQ905f3yf9/m8z/P+9d3pFezi  
u45CoQSI7++0nn05w95MYVBi6OpyHX/RRzLe3fnEGWYEbvEpvelYwYh+ohZ2

g/MXY0I46/pyspXB9Rmzm1FeYAQ0xj0vihtkdI1ZuKZx1hgtiBSGmI4zUqtb  
72wJXleg2n5m2eAM43ZoqPmo8gb4W81pNLssM3qN1RpvtW6E8+LhOakvFCx+  
bmVGcTZB7vBPr7z7qUg/UffuerYcpvhqWr10aZTUyYqkAxWgdWrrDFXcP7pQ  
t3dAeSv6aeaiZAMlvBiQnWVMK0Eru3mva7cqxi187pW1qmCtr3LfkQp1SH+R  
pZ/jqKFEcui/HzmaoLn7UF7Zb4epmfxNryptKA0PjfKzd+BWZdCplnkd6NKN  
hRKBGhh7ZDm3/8ke2K8N6b9Q3oWozok9z6+bgHWTm560Xgd+08JX0Rv34dRJ  
4ymraR04LPpeIMLNwG7gVp0tuojkSFfwvSyQ+70xRQjHAN861slv5zJQbDCc  
r+lliKSuYj1qBlA2zF3ts9+L/Jo7Sksethgqnhwpzv40HY3QGPP2AJNfvy+l  
BhpDdsnCJNrTDgq/Tur2KpthvuEI1y7QH4MpvIzDh14vuP88E4WDLI6xUYL  
dKjx3j2IFLKwrku00h9ug/lNO5VddY+hyn0452I4A2/yFWtERsf1caqllkP  
2LTRjoQw3eHk+dzFpe4AYld7Z+KDPTFXuCElqNYOWUNsiTZfb1ipnlkq/cUB  
kkVppObNMzArvrKW2clCVetiefKP4Ui8n9H3Ws0TOx0/2bkwovDhg6PkGNUb  
KstTFJnqWHyx7Zmk1fmhw7RvLnEwASIKQ5dL7wfipzjyh38rJ2HfbF0Su+os  
uk9XWNaqpsjXjvlDkz4bGR33dJoepSPk9dJ7tm4Y3Gud/BoYmQh+oS3Dplaj  
vLqxRSU8C1Fd1u/qXnJgsyH+V6ncbDxNinh9v5/HsVpNW4OGHEj53/6PYmUk  
YhxmmJRHV5G6XnrbiigKhf6OV/q7cqEqdIpO4F+Ct2i1J/gpDw41uuuvWcbA  
84lfsmIZgduL7aZN+2PRPjW48jrpGILaOyNWtOPwMK+Z5eucB2rs510bdeJR  
JR/qvmd7PiTMpe8GaCbAecxGZPg6H/HRcfYDspfxMUdRtllbgJLybSw12UTE  
dd6PTzAtxD6vLezQ1UQcldhwbbyjEC7qFH+VP7nIfuzXLvlowuZ62ac5b5Og  
7ei0I2yqCHbvL9K3dyej0lQ2x4pdDLUFKfVL3SlgfB9IjVgoxkVqxoBheyra  
Itqfa4eW4Gg5u3z6XhqYpQE3fh4pwbPdnNHLNek43Hi6/5MOH43WAwZ7Sq/g  
9Bq/Pu8EH+YuRm5aaRlomeYl93H5qCh1m4tgZsLV+Pikby0foe02h/zqM5G4  
/DY6dJQPmW0MJxvLLAQmev9TICPAW+LMH8V3s1BGWnd2GwtwKVfBq2JXNiRt

+oPdWQJMxLURBcJsaIzXZvwRKUBW3V2WEi0Hle8ls/cWCLDxjehZVGE0iirT  
fFgPBGByaYapquK/GbkH0V4J8CCiUUUj8yqS3k8ccl4QYP1x9n1ycy6s5fvz  
mAokkmOP/lmVmIvKq0PCFT0SPfp3vp5cycXuWwWXVm1JfHys1rF8gQejiNGT  
10+QsBXVa6lP85BsaVd+5SyJ/5VI3DD4zEPYssK1CbG/47ma0Od4mMh/GMYM  
JqEeP2nrscRD2z96Pi6L/cVD41Q+hcCTLtaIN5tEtVxK3lZ5AvUNhv0m50ho  
nT8hu9mYwMT+/SbNF0gUnC3LVTclUBWUnUyLJKHg00szNCPQcjXg2TmxKS7p  
+vaWBIJ/K5DXvkhiWL/ph9QDBCLtyIqEKBK8kd3xEkfFe3U3KqJjboLl1Jy  
I0DTKlckxE5o/y1r1zECY80P5SfFDq3z4B/8F4FvwpMdBTEkHHIyG+K9Ccwf  
bHJZiCXxOHmYmeNLoCa6t+nHOB LWMXrtpD+BnLYeWqnYekHNg01nCDyIV/Ec  
40kIvOW9fg8isPJLeo1QbGV3z4k3wQQ+DQQ/XBE706kqZJpNQM2NveucQELi  
0NLitzAC0s805peL/X/gVQ5L

"]]]]},

AspectRatio->0.6180339887498948,

Axes->{True, True},

AxesLabel->{None, None},

AxesOrigin->{0, 0},

DisplayFunction->Identity,

Frame->{{False, False}, {False, False}},

FrameLabel->{{None, None}, {None, None}},

FrameTicks->{{Automatic, Automatic}, {Automatic, Automatic}},

GridLines->{None, None},

GridLinesStyle->Directive[GrayLevel[0.5, 0.4]],

Method->{}

PlotRange->{{0, 1500.05705}, {0, 2470.453224}},

PlotRangeClipping->True,

PlotRangePadding->{{Scaled[0.02], Scaled[0.02]}, {Scaled[0.02], Scaled[0.05]}},

Ticks->{Automatic, Automatic}\) \!\(\\*

GraphicsBox[{{},

{RGBColor[0.368417, 0.506779, 0.709798], PointSize[0.7], AbsoluteThickness[1.6],  
EdgeForm[{GrayLevel[0], Opacity[0.3]}],

{RGBColor[0.368417, 0.506779, 0.709798], PointSize[0.7], AbsoluteThickness[1.6],  
EdgeForm[{GrayLevel[0], Opacity[0.3]}], PointBox[NCache[{Scaled[{Rational[1, 2],  
Rational[1, 2]}]}, {Scaled[{0.5, 0.5}]}]}]}},

AspectRatio->Full,

BaselinePosition->(Scaled[0.1] -> Baseline),

ImagePadding->Automatic,

ImageSize->{10, 10},

PlotRangePadding->None\) blood

\!\(\\*

GraphicsBox[{{},

{RGBColor[0.880722, 0.611041, 0.142051], PointSize[0.7], AbsoluteThickness[1.6],  
EdgeForm[{GrayLevel[0], Opacity[0.3]}],

{RGBColor[0.880722, 0.611041, 0.142051], PointSize[0.7], AbsoluteThickness[1.6],  
EdgeForm[{GrayLevel[0], Opacity[0.3]}], PointBox[NCache[{Scaled[{Rational[1, 2],  
Rational[1, 2]}]}, {Scaled[{0.5, 0.5}]}]}]}},

AspectRatio->Full,

BaselinePosition->(Scaled[0.1] -> Baseline),

ImagePadding->Automatic,

ImageSize->{10, 10},

PlotRangePadding->None]) liver

\\(\\*

GraphicsBox[{{,

{RGBColor[0.560181, 0.691569, 0.194885], PointSize[0.7], AbsoluteThickness[1.6],  
EdgeForm[{GrayLevel[0], Opacity[0.3]}]},

{RGBColor[0.560181, 0.691569, 0.194885], PointSize[0.7], AbsoluteThickness[1.6],  
EdgeForm[{GrayLevel[0], Opacity[0.3]}], PointBox[NCache[{Scaled[{Rational[1, 2],  
Rational[1, 2]}]}, {Scaled[{0.5, 0.5}]}]}]}],

AspectRatio->Full,

BaselinePosition->(Scaled[0.1] -> Baseline),

ImagePadding->Automatic,

ImageSize->{10, 10},

PlotRangePadding->None]) gi

(\*-----  
-----  
-----next mouse\*)

vn=readTac["C:\\Users\\exx\\Downloads\\TimeM3, liver 2.583875, GI 0.475125,  
ID 3515.csv"];

Lv=2.583875;

Gv=0.475125;

id=3515;

vn[[1]][[1]]

{{30,260.829},{70,78.7909},{90,57.9194},{110,49.6413},{130,45.2265},{150,41.3416},{170,38.2938},{210,39.2434},{270,38.0811},{450,38.3177},{750,38.2152},{1050,37.3374},{1499.99,35.895}}

model= mouseModel[Lv,Gv,id,25]

ParametricFunction[!\(\

GraphicsBox[RasterBox[{{179, 179, 179, 179, 179, 179, 179, 179, 179, 179, 179, 179, 179}, {179, 180, 180, 180, 179, 179, 179, 179, 179, 179, 179, 179}, {179, 179, 180, 179, 179, 253, 248, 179, 179, 179, 179, 179}, {179, 179, 180, 179, 179, 248, 248, 179, 179, 179, 179, 179}, {179, 179, 248, 248, 248, 248, 248, 248, 248, 179, 179}, {179, 179, 248, 248, 248, 248, 248, 179, 179}, {179, 179, 179, 179, 179, 248, 248, 179, 179, 179, 179, 179}, {179, 180, 179, 179, 179, 252, 248, 179, 178, 179, 180, 179}, {179, 180, 180, 179, 179, 248, 248, 179, 180, 180, 180, 179}, {179, 179, 179, 179, 179, 179, 179, 179, 179, 179, 179, 179}, {179, 179, 179, 179, 179, 179, 179, 179, 179, 179, 179, 179}, {{0, 0}, {12, 12}}, {0, 255},

ColorFunction->GrayLevel],

BaselinePosition->Bottom,

ImageSize->{12, 12},

PlotRange->{{0, 12}, {0, 12}}]\) \!\(\

GraphicsBox[{{}, {}],

{GrayLevel[0.55], AbsoluteThickness[1.5], Opacity[1.],  
LineBox[{{9.09090909090909<sup>-8</sup>, 9.090909090884856<sup>-8</sup>},  
{0.0874367476365131, 0.08197166587636243}, {0.18222810297558026<sup>`</sup>,  
0.1358255024317191}, {0.27073779576926765<sup>`</sup>, 0.13315455086535802<sup>`</sup>},  
{0.3575112797365835, 0.08143316377978886}, {0.4516394623155443, -  
0.007347854733426912}, {0.5394859823491253, -0.08816932746972758},  
{0.6346872009943513, -0.13787329990112937<sup>`</sup>}, {0.7281522108132057, -  
0.12816574147938434<sup>`</sup>}, {0.8153355580866803, -0.07001063326902106},  
{0.9098736039718, 0.02121659675083076}, {0.9999999090909091,  
0.10024804094746914<sup>`</sup>}}}],

{GrayLevel[0.55], AbsoluteThickness[1.5], Opacity[1.],  
LineBox[{{9.09090909090909<sup>-8</sup>, 9.090909090880112<sup>-8</sup>},

{0.0874367476365131, 0.08090369567458766}, {0.18222810297558026`,  
0.12746559200130417`}, {0.27073779576926765`, 0.1116266937044405},  
{0.3575112797365835, 0.046963725126600256`}, {0.4516394623155443, -  
0.04509050859182233}, {0.5394859823491253, -0.11115559892361665`},  
{0.6346872009943513, -0.12642564594664163`}, {0.7281522108132057, -  
0.07740196037964171}, {0.8153355580866803, 0.004179083230780074},  
{0.9098736039718, 0.08937493944143977}, {0.9999999090909091,  
0.12834702174618903`}}},

{GrayLevel[0.55], AbsoluteThickness[1.5], Opacity[1.],  
LineBox[{{9.09090909090909\*^-8, 9.090909090875369\*^-8},  
{0.0874367476365131, 0.07984396759533968}, {0.18222810297558026`,  
0.11939549826670079`}, {0.27073779576926765`, 0.09184904274707059},  
{0.3575112797365835, 0.017913117173780694`}, {0.4516394623155443, -  
0.07109962300031061}, {0.5394859823491253, -0.11717052830989395`},  
{0.6346872009943513, -0.09879571259704382}, {0.7281522108132057, -  
0.022693471356141894`}, {0.8153355580866803, 0.06128703302641453},  
{0.9098736039718, 0.11605625481609519`}, {0.9999999090909091,  
0.10415981267620744`}}}],

{GrayLevel[0.55], AbsoluteThickness[1.5], Opacity[1.],  
LineBox[{{9.09090909090909\*^-8, 9.090909090870287\*^-8},  
{0.0874367476365131, 0.07879243663407876}, {0.18222810297558026`,  
0.1116081822210312}, {0.27073779576926765`, 0.07372482040530459},  
{0.3575112797365835, -0.006267252216927747}, {0.4516394623155443, -  
0.08743897872291118}, {0.5394859823491253, -0.11109134853087661},  
{0.6346872009943513, -0.06371549528296311}, {0.7281522108132057,  
0.02544576624054603}, {0.8153355580866803, 0.09464282937855747},  
{0.9098736039718, 0.10731931496853601`}, {0.9999999090909091,  
0.0516787429232188}}}],

{GrayLevel[0.55], AbsoluteThickness[1.5], Opacity[1.],  
LineBox[{{9.09090909090909\*^-8, 9.090909090865543\*^-8},  
{0.0874367476365131, 0.07774905743802465}, {0.18222810297558026`,  
0.10409673959866513`}, {0.27073779576926765`, 0.05716133039337165},  
{0.3575112797365835, -0.026084496726167965`}, {0.4516394623155443, -  
0.09591154799603378}, {0.5394859823491253, -0.09685594593277226},  
{0.6346872009943513, -0.02730376120671303}, {0.7281522108132057,  
0.061646715198529656`}, {0.8153355580866803, 0.1046634148537508},  
{0.9098736039718, 0.07509702498429204}, {0.9999999090909091, -  
0.006536873471333553}}}],

{GrayLevel[0.55], AbsoluteThickness[1.5], Opacity[1.],  
LineBox[{{9.09090909090909\*^-8, 9.0909090908608\*^-8},  
{0.0874367476365131, 0.07671378556951527}, {0.18222810297558026`,  
0.09685439581479163}, {0.27073779576926765`, 0.042069810325321415`},



{0.3575112797365835, -0.042006785469922474`}, {0.4516394623155443, -0.09808544986431629}, {0.5394859823491253, -0.07760167026270944}, {0.6346872009943513, 0.0063643674428021085`}, {0.7281522108132057, 0.08405712128907425}, {0.8153355580866803, 0.09555213349985489}, {0.9098736039718, 0.03202960165577907}, {0.9999999090909091, -0.054402034659985464`}}}},

AspectRatio->1,

Axes->{False, False},

AxesLabel->{None, None},

AxesOrigin->{0, 0},

Background->GrayLevel[0.93],

BaseStyle->{FontFamily -> "Arial"},

DisplayFunction->Identity,

Frame->{{True, True}, {True, True}},

FrameLabel->{{None, None}, {None, None}},

FrameStyle->Directive[Thickness[Tiny], GrayLevel[0.7]],

FrameTicks->{{None, None}, {None, None}},

GridLines->{None, None},

GridLinesStyle->Directive[GrayLevel[0.5, 0.4]],

ImageSize->{Automatic, 28.4375},

LabelStyle->{FontFamily -> "Arial"},

Method->{"ScalingFunctions" -> None},

PlotRange->{All, All},

PlotRangeClipping->True,

PlotRangePadding->{Automatic, Automatic},

Ticks->{Automatic, Automatic}] \) Expression: {Bl,Li,G}

Parameters: {k1,k2,k3,k4,k5,k6}

]

```
Manipulate[Show[ListPlot[vn[[1]],PlotRange-> Full,PlotLegends-  
>{"blood","liver","gi"}],Plot[Through[model[k1,k2,k3,k4,k5,k6][t]],{t,0,1500},PlotRa  
nge-> Full,PlotLegends-  
>{"Blood","Liver","Gi"}]],{k1,0.001`0.2`},{k2,0.0001`0.1`},{k3,1.`*^-  
6,0.01`},{k4,0.001`0.2`},{k5,0.0001`0.01`},{k6,0.0001,0.01}]
```

```
Manipulate[Show[ListPlot[vn[[1]], PlotRange -> Full,  
  
PlotLegends -> {"blood", "liver", "gi"}],  
  
Plot[Through[model[k1, k2, k3, k4, k5, k6][t]], {t, 0, 1500},  
  
PlotRange -> Full, PlotLegends -> {"Blood", "Liver", "Gi"}]],  
  
{k1, 0.0076}, 0.001, 0.2}, {{k2, 0.0025}, 0.0001, 0.1},  
  
{k3, 0.00024}, 1.*^-6, 0.01}, {k4, 0.001, 0.2},  
  
{k5, 0.00908}, 0.0001, 0.01}, {k6, 0.0001, 0.01}]
```

Part::partd: Part specification vn[[1]] is longer than depth of object. >>

ListPlot::lpln: vn[[1]] is not a list of numbers or pairs of numbers. >>

ListPlot::lpln: vn[[1]] is not a list of numbers or pairs of numbers. >>

ListPlot::lpln: vn[[1]] is not a list of numbers or pairs of numbers. >>

General::stop: Further output of ListPlot::lpln will be suppressed during this calculation. >>

Show::gcomb: Could not combine the graphics objects in  
Show[ListPlot[vn[[1]],PlotRange->Full,PlotLegends->{blood,liver,gi}],\!\(\\*

GraphicsBox[{}],

AspectRatio->0.6180339887498948,  
Axes->{True, True},  
AxesLabel->{None, None},  
AxesOrigin->{0, 0},  
DisplayFunction->Identity,  
Frame->{{False, False}, {False, False}},  
FrameLabel->{{None, None}, {None, None}},  
FrameTicks->{{Automatic, Automatic}, {Automatic, Automatic}},  
GridLines->{None, None},  
GridLinesStyle->Directive[GrayLevel[0.5, 0.4]],  
Method->{"DefaultBoundaryStyle" -> Automatic, "ScalingFunctions" -> None},  
PlotRange->{{0, 1500}, {0., 0.}},  
PlotRangeClipping->True,  
PlotRangePadding->{{Scaled[0.02], Scaled[0.02]}, {Scaled[0.05], Scaled[0.05]}},  
Ticks->{Automatic, Automatic}\]. >>

ParametricNDSolveValue::fpct: Too many parameters in {k1,k2,k3,k4,k5,k6,k6} to be filled from {0.0076,0.0025,0.00024,0.001,0.00908,0.0001}. >>

ParametricNDSolveValue::fpct: Too many parameters in {k1,k2,k3,k4,k5,k6,k6} to be filled from {0.0076[0.0306429],0.0025[0.0306429],0.00024[0.0306429],0.001[0.0306429],0.00908[0.0306429],0.0001[0.0306429]}. >>

ParametricNDSolveValue::fpct: Too many parameters in {k1,k2,k3,k4,k5,k6,k6} to be filled from {0.0076,0.0025,0.00024,0.001,0.00908,0.0001}. >>

General::stop: Further output of ParametricNDSolveValue::fpct will be suppressed during this calculation. >>

Part::partd: Part specification vn[[1]] is longer than depth of object. >>

ListPlot::lpn: vn[[1]] is not a list of numbers or pairs of numbers. >>

ListPlot::lpn: vn[[1]] is not a list of numbers or pairs of numbers. >>

ListPlot::lpn: vn[[1]] is not a list of numbers or pairs of numbers. >>

General::stop: Further output of ListPlot::lpn will be suppressed during this calculation. >>

Show::gcomb: Could not combine the graphics objects in  
Show[ListPlot[vn[[1]],PlotRange->Full,PlotLegends->{blood,liver,gi}],\!\(\^\*

GraphicsBox[{},

AspectRatio->0.6180339887498948,

Axes->{True, True},

AxesLabel->{None, None},

AxesOrigin->{0, 0},

DisplayFunction->Identity,

Frame->{{False, False}, {False, False}},

FrameLabel->{{None, None}, {None, None}},

FrameTicks->{{Automatic, Automatic}, {Automatic, Automatic}},

GridLines->{None, None},

GridLinesStyle->Directive[GrayLevel[0.5, 0.4]],

Method->{"DefaultBoundaryStyle" -> Automatic, "ScalingFunctions" -> None},

PlotRange->{{0, 1500}, {0., 0.}},

PlotRangeClipping->True,

PlotRangePadding->{{Scaled[0.02], Scaled[0.02]}, {Scaled[0.05], Scaled[0.05]}},

Ticks->{Automatic, Automatic}\)]. >>

Part::partd: Part specification vn[[1]] is longer than depth of object. >>

ListPlot::lpn: vn[[1]] is not a list of numbers or pairs of numbers. >>

ListPlot::lpn: vn[[1]] is not a list of numbers or pairs of numbers. >>

ListPlot::lpn: vn[[1]] is not a list of numbers or pairs of numbers. >>

General::stop: Further output of ListPlot::lpn will be suppressed during this calculation. >>

Show::gcomb: Could not combine the graphics objects in  
Show[ListPlot[vn[[1]],PlotRange->Full,PlotLegends->{blood,liver,gi}],\!\(\^\*

GraphicsBox[{},

AspectRatio->0.6180339887498948,

Axes->{True, True},

AxesLabel->{None, None},

AxesOrigin->{0, 0},

DisplayFunction->Identity,

Frame->{{False, False}, {False, False}},

FrameLabel->{{None, None}, {None, None}},

FrameTicks->{{Automatic, Automatic}, {Automatic, Automatic}},

GridLines->{None, None},

GridLinesStyle->Directive[GrayLevel[0.5, 0.4]],

Method->{"DefaultBoundaryStyle" -> Automatic, "ScalingFunctions" -> None},

PlotRange->{{0, 1500}, {0., 0.}},

PlotRangeClipping->True,

PlotRangePadding->{{Scaled[0.02], Scaled[0.02]}, {Scaled[0.05], Scaled[0.05]}},

Ticks->{Automatic, Automatic}\)]. >>

Part::partd: Part specification vn[[1]] is longer than depth of object. >>

ListPlot::lpn: vn[[1]] is not a list of numbers or pairs of numbers. >>

ListPlot::lpn: vn[[1]] is not a list of numbers or pairs of numbers. >>

ListPlot::lpn: vn[[1]] is not a list of numbers or pairs of numbers. >>

General::stop: Further output of ListPlot::lpn will be suppressed during this calculation. >>

Show::gcomb: Could not combine the graphics objects in  
Show[ListPlot[vn[[1]],PlotRange->Full,PlotLegends->{blood,liver,gi}],\!\(\^\*

GraphicsBox[{},

AspectRatio->0.6180339887498948,

Axes->{True, True},

AxesLabel->{None, None},

AxesOrigin->{0, 0},

DisplayFunction->Identity,

Frame->{{False, False}, {False, False}},

FrameLabel->{{None, None}, {None, None}},

FrameTicks->{{Automatic, Automatic}, {Automatic, Automatic}},

GridLines->{None, None},

GridLinesStyle->Directive[GrayLevel[0.5, 0.4]],

Method->{"DefaultBoundaryStyle" -> Automatic, "ScalingFunctions" -> None},

PlotRange->{{0, 1500}, {0., 0.}},

PlotRangeClipping->True,

PlotRangePadding->{{Scaled[0.02], Scaled[0.02]}, {Scaled[0.05], Scaled[0.05]}},

Ticks->{Automatic, Automatic}\)]. >>

Clear[newmodel]

```
newmodel[k1_,k2_,k3_,k4_,k5_,k6_][i_,t_]:=Through[model[k1,k2,k3,k4,k5,k6][t],List][[i]] /;And@@NumericQ/@{k1,k2,k3,k4,k5,k6,i,t};
```

```
fit2=
```

```
NonlinearModelFit[vn[[2]],{newmodel[k1,k2,k3,k4,k5,k6][i,t],{k1>=0},{k2>0},{k3>=0},{k4>=0},{k5>=0},{k6>=0}},{k1,0.0055},{k2,0.006},{k3,0.001},{k4,0.0045},{k5,0.00338},{k6,.0001}},{i,t}]
```

NonlinearModelFit::eit: The algorithm does not converge to the tolerance of  $4.806217383937354 \times 10^{-6}$  in 500 iterations. The best estimated solution, with feasibility residual, KKT residual, or complementary residual of  $\{3.97501 \times 10^{-14}, 5.60764 \times 10^{-6}, 1.13146 \times 10^{-14}\}$ , is returned. >>

```
FittedModel[newmodel[0.0168612,5.86338*10^-13,<<22>>,<<22>>,0.0285007,0.00074283][i,t]]
```

```
{fit2["AdjustedRSquared"],fit2["AIC"]}
```

FittedModel::constr: The property values {AIC} assume an unconstrained model. The results for these properties may not be valid, particularly if the fitted parameters are near a constraint boundary. >>

```
{0.986349,421.346}
```

```
fit2["ParameterTable"]
```

FittedModel::constr: The property values {ParameterTable} assume an unconstrained model. The results for these properties may not be valid, particularly if the fitted parameters are near a constraint boundary. >>

|    | Estimate                  | Standard Error | t-Statistic              | P-Value                   |
|----|---------------------------|----------------|--------------------------|---------------------------|
| k1 | 0.0168612                 | 0.00153227     | 11.0041                  | $1.3984 \times 10^{-12}$  |
| k2 | $5.86338 \times 10^{-13}$ | 0.000231075    | $2.53744 \times 10^{-9}$ | 1                         |
| k3 | 0.00063008                | 0.0000983467   | 6.40672                  | $2.92897 \times 10^{-7}$  |
| k4 | 0.00120315                | 0.000205566    | 5.85284                  | $1.48788 \times 10^{-6}$  |
| k5 | 0.0285007                 | 0.00263069     | 10.8339                  | $2.09859 \times 10^{-12}$ |
| k6 | 0.00074283                | 0.000240487    | 3.08886                  | 0.00405854                |

```
Show[ListPlot[vn[[1]],PlotRange->Full,PlotLegends-  
>{"blood","liver","gi"}],Plot[{fit2[1,t],fit2[2,t],fit2[3,t]},{t,0,1501},PlotRange->Full]  
]
```

```
\\(\(*
```

```
GraphicsBox[{{}, {},
```

```
{RGBColor[0.368417, 0.506779, 0.709798], PointSize[0.019444444444444445`],  
AbsoluteThickness[1.6], PointBox[{{30., 260.8294063}, {70., 78.79091199}, {90.,  
57.91941777}, {110., 49.64125588}, {130., 45.22646452}, {150., 41.34164989},  
{170., 38.29379755}, {210., 39.24342221}, {270., 38.08110319}, {450.,  
38.31765037}, {750., 38.2152183}, {1050., 37.33741087}, {1499.99315,  
35.89502699}}]},
```

```
{RGBColor[0.880722, 0.611041, 0.142051], PointSize[0.019444444444444445`],  
AbsoluteThickness[1.6], PointBox[{{30., 177.8981236}, {70., 394.0862701}, {90.,  
432.5423771}, {110., 456.0409532}, {130., 467.2743133}, {150., 473.5832664},  
{170., 476.0597683}, {210., 476.2390374}, {270., 468.6529097}, {450.,  
431.8789953}, {750., 360.561313}, {1050., 308.513019}, {1499.99315,  
246.9571621}}]},
```

```
{RGBColor[0.560181, 0.691569, 0.194885], PointSize[0.019444444444444445`],  
AbsoluteThickness[1.6], PointBox[{{30., 128.8892378}, {70., 255.4723487}, {90.,  
277.5715818}, {110., 301.610403}, {130., 332.3522799}, {150., 375.879715}, {170.,  
413.0568364}, {210., 472.3564972}, {270., 525.5164453}, {450., 694.3611393},  
{750., 904.4944908}, {1050., 983.6378075}, {1499.99315, 1043.905439}}]}, {}, {}],  
{}, {}],
```

```
{RGBColor[0.368417, 0.506779, 0.709798], AbsoluteThickness[1.6], Opacity[1.],  
LineBox[CompressedData["
```

```
1:eJwV1Xk81F8XB3BknYSUCJUoCUkiWb8fYYSyZ8tumLGvISKVbFlrBtmStBAJ
```

```
oaKkRfFDWpWtkhJJ0owleeb5677ef51zz73nnM0eQVbeHGxsbAfY2dj+f2r/
```

```
fvsrRJCNMHruLr2ml4bhzC83JyMHifPiB5rUbWil79gQVhX5g2hMn+Bben8e
```

```
PaMaNumRS0TVKENg1/Q5MGeeGsRGrsvrc7Pbeq500vQ/KU8Rwi8u2ONAnpy
```

```
UNlscG0lVRgquYtGhyg5aI9u3tkvtg7XviZmn7mUjZULAjrhkRsQxZ8tnKyc
```



BUIHL7YP5pvwZP9IE7PaTIgODnwszZHClXYvXX2uTGzXUbnMQ5WGjRwlWKjp  
LMYXBhRei8nil3RBOr9RGs7HqWgER+7At+OVXT8XklC8Y7BAxkMJbhnfajWO  
J6Fi8MzfN+Y7oS2pKr+dMwkDxVPDxTnKGKXmGLaKnsbUP/1LXFQVtG5wk9vv  
fBlzdutthodV8Gm3t67G70Qwq6c4m213o/vJFjdPeiLYXPPJ/nqquE8eWKH/  
+ASE709tfym2By93zTAAaDiVgneij91UZLEuf0w2biodEUH5aEqc6up469mrp  
xWPLJoMfGtPq6HlLpLb+isOe+PybpU81EEyzUwmJPQbNt4HuMTqasPYOFXP9  
GgNip4GwTZ0m1ky9WHvUNgbGw1NhPCVaiDDWmhjRjIYjYaAeGKkDWbWgpi65  
o1A611+8i6GD3hrHDV2lkeDoEeL6E6ELH4a03oREJcPdBvuORRCYeXJKGRIR  
+Ker1WhwB+gOudTppR2Gbx7VVNkFQEHsrD66MxR9SZs38mrqoUzh7Q/ZI6G4  
0s1zurNZD8G33voKJofAwuWVIVXzPrDHxz5bnA2CZqIRt+r8PqTmXwuL1QjC  
loo7zSla+lCvHQ0wTwzE/I9Sqf4mffYVu/0rRioAZXEbu65NBqiYrEywTqci  
/eLIRb05A3SSEzKuT1MQ+djaVmavIa4cLHWg2VNgukrz3lijIax8/qm9VvHF  
bCF3akDjfvB379F8JEDG0INonUPM/Wj+09KXctYbHaOT08rqRmh59zLCSNAb  
RYovD8/eNoLqU3Zzbwkv7L9XsvXYbWNIG/PEkW08oDwi30/MMAajUL1Rctwd  
4pxJ6bp7TFCewSd2IMEdP039f7PfNkH7TsuOvgY35H3Y25bccAAC1ROqylEu  
SFyuDKf+OYB1q437+Z8cgb/MJjkzNVOIppjOcYgdgZ4fV6ZggymWStukBp46  
4fvCC2davRkEYipk62wc8GqjoVDUrBnOriOd7ntgj9Z9Te00quZwXqvg5qBs  
j5zUYvkN9eboF710MV1/GFrifnOX6g7Cf15CqFLIFo8+RUyb/DyI9tWBmxhF  
NjCrTPj2U/4QBqNO2jbtSGLNu2dVtkhBATPXKPaWEovxm2AYmwBE9EJXrkW  
SyStlb/TJlsg6cSDa230lnh+10+V4CkLCMTrEwH/LGCFyK6G+xbIa5NI6Day  
gNeLthvs6pZgd+e02fjZHFfvspte2VhiYXaqXFTPHD/yafVXQi0RMlZqnV5m  
hkiPi1Xm1ZYI7zbyLAKyxZnftwvzt1rh5Gqfd1RIE1wX+RS7a601lps6Fjp0  
DDEV/TWKU8Ua81tU6tw6DbB7aDL87SFrVE142wQ5GeBeBdM/Ls0aupEDoncT

9fGf+qojzzhsEFR+fbBgUg/ChcIOhVI24E7t+hWTrgc7NjHbIF0bfPO/bRug  
pIehDmlzkRgbfPIa83GMAqYd9uq4/7KBgYH8y/37daHaqqOhKmiLhFKycnu5  
DqKl9dV4dtgiTvV79h1uHXBMmO+44WuL0qFlkc5XWlgT67lhftgWVTPpivF0  
DewpzljK6rZDzUZel+NX1VBZNqPaPWGHFcbTmvf2qkHqip3/Sr7DcGseT7fr  
VMXKmxs/nNZn2fK7WjBzN0baqptimg5jhenOwjGKCmyfCE83vj6M9k8Mg8aV  
Knj+PHLbn5nDsK/pIzJqdqHhpS4talC9enertv35q4zUL91hXmX2KAkrWp5x  
2onlcZXKi/ftoc2XIavZooTwKdqnoQF7VPgqdwxtVoIr08XSQdQBsQ8HNOZn  
FaHK91PpYLoDHj0x03DqgTyGFAW/q0c6Ym32q6h/Q7Kw3hW2OSLXEUS/WqRr  
oCw61N7a37rpiMBw/4StbLKO0y15qjhiF/bPyxXym9FssXOy5vdnNArp5lj  
WCCDJZvcAZc4J6Tsqukl1pJBqANzTWGBE2xpXW9Lh6RxxON+4rrXLHvVOX+S  
l4ZK+CG3lQecMeYYPNfZz9oTUXV0Yx9nrHnkTZpLkYJknGjP6VPOWNt78vpb  
LSnwJA3rsN13xgXJR0rMZBMG6EESf3az+lC4u79x9QZYFr60UrE8guzKm1td  
0iTxpFQ9NSjwCBzGM/w+8Uii9try3PjVI5CNu7vDhE8CSXcz3wxtcMF/G+5o  
Liqsx8/Fo8doOi5I09TbcqJWDPbabiHj7gg2qgkeUhDDPItytSWQhcEMJys  
RqxEOdP6YumChCuc4psrDMpFsHe5ucxayxVaJXjv/tMVQRIRZrTSyRU6dkcL  
6j+sRfiD00yYAlc8YT6w8pJcC/6PKTIV/G5YG5o09apRGGD/55Us6Yb6BKMn  
bzyFEbE5VN1L0Q3buF7I9a4WxpC744CEmRt4qhNLYsJWo/aTvGxamhu8UzzG  
os2EMMZRMke+4AYRwbyr7DxCEJdZ07mv0g2G7ctqh5MEccpzMWjhuRv21iVl  
xSUIwG60s5lCcocm+6a7r/P4kcqJdENxdxT8/trPK8uP+1vqXTbLu8PzZrTR  
TMNKyHkXrug3cce1koycykESFr/4mxunuENEqvSmiCkflLk/btqS7w5rwwfa  
+0leeMnazixfdYdq162ywUxedJN16I0d7qCs0V2KHuRB6ddVH2V5PVhz7F0U  
PZsbr3gS6zjEPPD5n3Vwsj43+OQYp4e2eaBstGizl5MLob5D8jQjD2gfrY0K  
8+KC4Xh10NcZD9C4Pxy0seZEDJ+M0UeaByK2ZCVIr+FE9Xb6+pYKDxQ5WK50

eLUCYtT41vAnHqhbcTal3WkFvn8/xDvK5QkFvnXHY49xYP/s+MTNtZ7gLe2J  
NznAgbKlkz1xMp6Y+VVBUXfngJNQE01Uzxm1jla+Li3s6FKT2moa64mvsx5k  
dSF2yBF3eMXSPHE8biqP8pUNp4xtJkFzPXHPsm8o4z4bdJyS6443euKQQEto  
cSgbqhOm9W7NeMKzhmeR9mSZIKWmbo1n94LCcJ2LxMllgpy7hc9MyAuTy2k3  
9uotE5sq7Hu/7PBCrltbouTDf0RW5wOX9RQv1JiHqIW8XiImXznuGzvqhYed  
ikf5i5cl46HZrXVJXnjPc+zGc58lgv2X3A+zci+U5X/n3r38lwhdl30sYdgl  
baFPm35r/yW6Nym4mk954Xvy3RJ7wb+E/PbH+8SXvMDN6Hoz9GmR+Kw1z1cv  
7o0LV3lfqp9dJGzc3fO+2nrj/EcftpipBelmdfFYvZc3xkR93+1/tkDwh593  
PRHmjycsdh6eywvE46RnshLZ3pAsKHxq7rpA7Kna1XCwyxucMbPDfkPzRE5D  
Z57EB28Mijo6HXgwT0y1esd+G/dGj2Lh8T9l88SVF/n6iTxkvJnq33mROk+I  
Mdn7GvaRwT+QmPSeY54lZytsSLQkQ9soKO369zml29P/iE3MnL2vrsq+3KO  
SJGkuo3HkeH3M01VpGKOWNDRm5JsjNm8dcjivUcYUFR4tv2jlxrmYPrynXn  
ilqsVJld/WQomgsvnjGfl6yH99kbzpPRIHsxT4dzjrjOXRJ6iM8HtVKGYzww  
TIJNaTHdYb0P2hmV4/4jTKlqtq4tQMMHIkm2e+ZamQRHueDAURMfOFo83yRa  
wyTsO/0YJxx8QH6WSXIYwiS4xLco0KJ9QI981F+byCRcGs+da232wSdatXnx  
QSZRPzRd3fHMB+9Q6Pp8H5MgcZs/6+v3ASIVs4iqziQabbj+jc37wJDmdnRp  
M5MQiHUX+8Xni9pU+xUTokzC61KLyuj6X+DcUN4+ASYhNBPhI6jpi2STiPtb  
/zII8vq+E+sP+MLxCZde1W8GcQ9KhTKOvnAwzR/ImWAQlMyxXvUYX3hlaS4c  
HWAQD27vm9BL9cVnWpN56GsGsW6omMuswBeVzSWOj7oZxEPFw5pud3wxN5Ki  
7/OQQYjZ1NIQn/tim5TAr7p7DCLwmGBQ+HtWfLl4EYtGBvGozC/l+HdfVCsV  
/dS4xSAknj+9lLzgC6ZKy00gGwwi9JdMaw6JgvtqnIM/rzKIDrGE4XiFHio  
u8Y2lTOIcJ+9q2o1Kajam02VLGIQzzPObbt7gIKVGjGG9fkMQur2tN5jRwoS  
Jjj+00tjEJGDZs49VAqKlgWSr+QyiP84r0X2x1DQ4d7Mx5bNILYocmV/TqWg

pV3ky/kMBhFj7V75o4ACrbfqN3zSGURvTMtj5nUK2A/u/hOWyiBky9aPsN+l  
oLNfwqI5mUHEPotYWNlJgb0il+WeMwyib/rF2nUfKJhWs8gaP80g5MSUdkpN  
UGBRsbbnxSkGEU+kmsgvUjAZxj/y4ySDeEMe81RdScX+uMnz2iwrZuw7ritB  
xUgppf1eIoNlBcJOM1agQqtlr1YAy+8GFm5ZaVHRf10g14xlJc7D/zmbUqHt  
WGrijyPIphbqvZCcqpOb8i86x/N5KkCPEj+XkogsLLO+K8ZM8doyKHYMkuzRW  
vOSLT/ecTqMibXHmpSErv6EOGcvMC1TEf82V3M7KX3U63i+/kgrzywrqqkM  
llV04PSlu1RoamZjk1n3nc/42uLRSYXpuTKvRly9fll//9n8gQonjY1qix6  
vYn7t+Pjdyq+z9s/aE9jEIZ/+MilC1Tw5V7cF3eWQdT7ixS7kvyg9jlw4XAm  
g5AelXqzUdwP4x3qstas92F7qb6/SMMP77vpL6+cZ/2nA/rHnU38lFQl2bdM  
ZxCdbQdvSzj44X5elG5EAYO4c9NbtDKD3ny3BENJQwiliOXm97oh3v6KgXR  
lQxilKtE1+6pHxKEPKKuVzMIq7jrkSjv/fDshHjZ71oGoezfNpbL8MPFBXh0  
NTGI7yY/n2Sp+SP6Rh85+SmDcOMyPZNa5494fRf0098YRHes3X2Tdn987Ll8  
UvkHg9CZdWfyvvrH8BulsMZfDEL8c5TPmRl/PMw+szC7wCBep6gwOrUrABdT  
l2kyrP48EMvBe7wmAF9KgyrZWf2t9rs50aQyEJWV49uqsphEl/XEi813AhFT  
vcp1041JeNRLSvR1BKJ4Uuh91QUmkRERf0NILBDc1WB/UsEkvjEN+n5LBUHV  
dN0H7RYmUfC3RyKSfoTGJyO2GyZY82tF2OEWBGNjkw71jckc4c2f8r1NIQRk  
jYBcM4F5Inho7lvI9jBYfu11lLu/QAS93spvwBWBcU+l+jyTv0Rsj/aX5reR  
GHnNVmPbskQ8S6bT3ryIwpCYG9egLmu/+dT4i1yPgX+fqDafKRvSOFdKLF6L  
ReKB08WH/rJB/LJF/KnS48i307Kv+yI7DjZs58zTTIDWraKNnaocqGF2qbbt  
PQHLPuO3Yro4kNrVfXRxayl0Vo6W8luvANeJGVm+bSchyNV6JWFwBXjUV9b6  
ypxC+Wi7tj4LJ07GJ5r3C5zGl8tFmTt7OVFyRcJug0AShJery/cYckHNY01I  
6N8kyFqtn6RXccFqI5vP+rEzeBW+v7aEnxuCdWSe5X5Oxgqpg6KCQdzY/+2Y  
zqbeFPDV01Y1PebGBgZp4/HeVFTEfHmvtJEHx7gy+5W60sD49nZr7SAeWF8J

uTJ9Ox0fLCXadzTyoFMu8uPphrOgX9JsGF7mQat2/w7FSxnIK7+6xYPghbrV  
Ltst6ZkgGbOfuR3Ni6uXbGePGmShReCt4KN6XoR+1TMi38lClp7rZp5vvOCX  
ICx0NbOh4mizmCPBh890v0/FtdmYfXNh02pjPhw/L+xxVTYHRi8D+sjBfBhP  
fE6/cDkHJuSi0MI8PmQ319qJSuaif7vMquk7fOAbudYZW5iLKc9Xi08H+GBw  
RlIpTfwcRh0cwlSx+HDvaOt66axzaApm6oyuIYHTPuRumeB5lMn3xOxVJCHI  
hPVYzdJ5bLvzs8oIJPQp3Px3ZPE8al/9dDprScLE4w3/zUfTUGMczNnoTkKU  
RqXL3zEa6t7nk6dY5r7x/uf1OBq4vnwp3+pBgtQ5urDzCRrs0xYbclm281ht  
35pMwxetJvlATxIe/OP8nEinYf86C09JbxJo6pNzKxtoiLYOU3fxJUHv2p0t  
G6dpmJIHYVQgCU0lPFU7ZmgImZ0sqGJZmWazW2eWBmKmiHCE5Y0np/Sc52h4  
qy9+3iilhAVnadcCNjqCrMOG1wSTcEsoNX/dajoePGUGlYeQsCXKQUBQhQ7D  
zZl1l8NJuBBYcX6jKh3Hjls5vWJZ2Pu3pNleOk4uNXzmiCCBzeqsrkmHWsa  
Kv1cWR5UaDNO20dH1bqpk+siWfkPy53ksabjoJH6Q0xREla9iSCJ2tIRfj1l  
4irLp7oeZssepqPyos6LVyyHNjuXGjrRcSTv6ybFKBIO5ma1nPRk5XNXqPMd  
y49TBg1yvenweamdsSKaBO0E+a4yHzruinLjKbEsH/DofZsfHRlhZ4YTWb7o  
udrjRQAdkY4WS1Usizm6jI8E0ZHa1PfrDctZFpXB0yF07KaLtLDFkMBjNMdc  
DqNjYHmTqzzL/wPGH26t

"}],

{RGBColor[0.880722, 0.611041, 0.142051], AbsoluteThickness[1.6], Opacity[1.],  
LineBox[CompressedData["

1:eJwV03k010sfB/CpSNZEtFiSNpRkz/62lKVkGTOWLMW1hMFYhpn5TpEtooWY  
uik1yRKJSozQ1UILaZOrbBUIZbkURek3vz+e85zXH885n/N83u+1/pGugQtj  
JNJbwn/bTrV9R99KcmCFNXsvGqxrUX/8aGqr4xei910Ji9gcD0OPVSKqWCM  
WoiRB9fxr+ihY9DILYvx2yLnsbRL3tgGM50tNgrDEgEpLa57/MnI9uQPFeVI

I/fv46+ET1FQyJcqEw+VQf3JXQ08vjvuMfla3SvlMfx4+cCJd3shPitlFstQ  
Qt8/Jx5kd+6HotdfpLeOa7D7bgctqtkfK3p73l3IUYFKaVyLUWkA1M10LouE  
qij9a2vqeFAGHH/3b05cuRH3irlfHpaHgHo1Pful0CYcNuhe8ph+AH4+OuMm  
E5tgb56+PFE3FPTG9Ou8VnUoecU9C7wShjyOjLEUQxPXKA+Gj4ZE4Lxm79/r  
/Lfiy0C5RpFUJIp703+9dtSCbGWApXJ1JHrOj/Wfz9mGUPoj0v24KIzNW18S  
DtXB3Y7/JBQL6JikrnLr79dB7uyp4Lp3dMxUjgnxKboI0RxpfrhGiS/M0Hh  
lnrokdETyyyLhsydMfWXXw2gZjLssfpCDORX3H9TccwAc3znT3+9iYFC5Jmj  
aUKGq09yEA+WjcX6NTajRhOGMDW02FKZFAuDQ2eqLrQaYYfnFOOPUxyMuyL2  
s8yModJa3dOcGAcLLRsZtxvGuBhbnRZZFQe7/rEYkUIT/Ck6J1okwYCXhY1h  
BMMMvkNjutJ8Brama5zXnjZDGFxcVn0IgyUd0sLf48yhTeVpG0nHo9y39wU7  
zgLZjfd9DALiMW9uUmtTDzQMDKmG/o7HsH9l6MZZgMuOnyham4AXaWuVlxhb  
Ynf78fe/bBJQ8lQk9QnfErIZ0Z4rMxLg7PvK1ZVvBQ001WSGCBPGh20X6/20  
gj77razRBibWF9fz5YyscXbqzPXNVkz8HL2g0l1njQr/ydtfmUzwOLQxvzob  
BBY/qSO/YyLr4sBFyx82KEteUpP7kwnGAzJl3fydsKp+am64jIVdksYNH2t3  
gPWT31VrzsK3gsWZtNqdqA60WzufwxLkkGnmNLMTi6+y024Xs/Bw80vENkNb  
aNUQVjN8Fs5teen+7ZYtksVP8b73sbCzoXAD+5Yd9Gw3h+xdx8a2AZlu72k7  
0AaXtnrpsrFaKC3L3MAeZ43nU8as2BjffT614JY9pHhHz/bsY+P02+3NR2oc  
kLW6n5A7zcbhP+Wxod8dUBVyrvRnERvh69ao7dbfBe7H8YCUajYsw4SPL63Z  
hdk56o28R2yMzD73zr+5GwytgGv939l4pbxD0uHbbgyoLn+hRSLQZfV3z1PP  
EW3ad+v1xQjkZJ7XULrpiEyuzocDSgRMVof9uHRjD8Y3zGleBIH77+Mm7Mf3  
oNLF8YuNHYHd5YnD4xpOIBufnbjuRMDXNP9fE54TbptyciZ9CFhe29dzwM4Z  
xVw5beUEAmmyQf+aBjklInlii+5BAo/jw14tTXFGy5y8vEIKAVcw2mruOGPI  
u8304OME/np+tGGBoQsywq81ixcRKNu/WffKzQXvNUwGnpcSGD2Tf7Mk2gXz

H7SVo68SYPhfrHCsdIGVzPtVNrc11LcUl6q0ueCull9IfD2BeY2KoqnPLrjd  
3DaT3kQgfepWwZkNriigGU5btxBoc284HW7tipMtZ7onHhGQbmg+ZbHfFSNm  
sp847QROp7RIDRW44oB9m7bJKwJX5N4T2svJoLNGTskDBMaYnxKEdMjo70qd  
lftAQLfva2yXExl1E+Jzt4cINBTPhH00kkEyXCRfP0KAJP47xLmMjNEfizxl  
RwnYRC4MXNdKRrrQrIbbOIF2Q0mfrWvvd4KDim3hsioBMgYxngYobNmV9XpJx  
nQCVtJISae4GtvL95bQZAn0PVR3IWG54bl8wODVLQFVTzX6Y6wbP2OwC7i8C  
wSc1d9yucYO/DLnt4zyBCc/tZvv/c0ORpPou0QUc6DWZGektpUBfyT/OZyEH  
TFVrfrFNCr4LHXp6fhEHTWl22m8cKOi9t/V+uxAHC784al4NoeDcXqk7I8Ic  
7HQiqyemUVD+NUZ5ejEHmTc8NpCLKEij3MOECAeyRIDSz34KeGrXbK+LcuAx  
ELKq7TcFfU6yn1liHBTYRMgVKlBxTr63RVecg4HSmGXRRIQsYIUZ9wq8XpIp  
ucOdin50Vl68BAch9IOiK+OoaDSNVl8kycHVzmThLzlUqD7fY5so8KRRxoKm  
KipyKG4YF9jg/LHfj55ScWrwZqCzFAflvEm9p1+oYJrapvIEVimhhouLuqM3  
u2Lik8D55fWX7Da6o/+K/ljKUg7Eq5Tfplq7o9ilesNR4MSbh2Xu7XOH+4DJ  
sQiBp+s+2pMOumPljtMNyQKHNTokmZ11h7SUaWK2wAPNIXWsOnfk8b6uzhKY  
0ilzUdvpjoPXFZ8cEvjxY8am75PuYPgOPAoRGB1vfHWkPaDR98rJVuCal+b5  
kZoe2HWAm6cgsMa/vPYKBw+kGj54OSSY90LPYUGRYA8cSZyzKhZY7l2o6aZU  
D0xHvlTWETHz6GnMXzwp2I3STokJ/OezTvnFOx6wXCDWVyn4n9ix/Pd9PR4w  
KfRSdxB4ZHJ2leKsB07Uy5T0CP7bb8bXxXOFJwp2DqUHCfxq7u6RfD1P1Bqk  
/vok2I8DadM/L108kZxRpL9fYD3R8a17sjzhsy2vwkSw3zJjctDRMk8c2vXU  
/Jxg/8oytecetngiuK7WamYJB6IKhySsF3ghdlTDNk+Ql74tS0cMGV7YyIqp  
5wjyRtaOWRuX64XzniN2JYI8PtTv8rhe5YUY8S2JjwV5vWFe2Lrlifid2gz  
50kcHHHWurx2316QdAKcVH4T0I12ifu4I2zury0oG8EShJucO2CvRF+JZFv  
JOiXImdFR2qKN3T+NWUtmSQgktZvRrrjjQiNV+JnBH3s4UYqfNf1Af925I8j

gv6m3T7+uk/JF+8lVPxq+wmMz8Wz88188cUtlazVR8DDdJ/KHh9fCCmrXrrU  
Q0CjcVtoY4EvKpm8K0ndBDqanv8+q+AHk51SdXlvCUi8y8ipkNgHa8Xprdce  
CPo9+IR/QGw/On6EshTLClyMOC0ZFA7Asddlo0lhBGYtX4wp8oPwjeN6NXKS  
jcwVPamXboeCEty0pSmCDf0p/hF6eQTs1ZliF0ywECiRMdK8mY7mlL02lwkW  
ovp+DNPVYyCcvDaocSELkZ0bJGyE49Ch/+ZbXy4TRIfpEL+LgQV8RfSoM/Ho  
CDf/9fMEWHTtSLzDT4BY8LVwuSsrKVGpTwiJ+CokLjCnGDOQu6lTOnheKy+  
7Hwo5cJBCN2pvySVFI89NepCp40T8abVT9J3XTyuzbTpNW9PwlbPc+nW/zCQ  
2fY0fm7DYdQEeatJBjEgnDS5UXRTMho7U07WlmZAxFC8OmRdCsyjTjpyzuOQ  
fOiwY7dUKvYpTFVGesShsESBqiSVBo7xOHGcFAd9f1l69K80+JnekDpYFQtX  
ZVLwqo/pIAWMvHgSEIul9VKPcj8cwcLDHWpZMrHYOcw2W/MsAyXMebnDD2Og  
NC2mfPBZjtZ/2nR6AysGbOHj3VvbjkLtXuAZaa0YkEvoJRO3slD98PlD3kg0  
nqgx3qXWZOOPmV7UGl40mky7NbdcoOZ42VLarF80DF21KeuzjoOq3/M5UyUa  
pZco3+JtTqAy13netJeO6E+WtkH1J6DTFLbtdSEdEgoWzubGj1Gj2zB4x5eO  
D9yw9+erT4L6+lmFyzo6DubJ+JduzEFLQAnbdiQKnw8/5p69nIObasv4jVej  
cJffTV2hmAsPN+X2WEYURAFknhAFuehkFK3rNImCTbri1qOrT6Eqz+vvzEVR  
alhvwqV64hR44/IulhcileRBv81bmodHtCZR0d1IZCSRP5an5eGrb2eCbUce  
XmyumveZy0PZ3pJnvpER+PJAqf0nMx8LflyDxWNgGVZ/XrliXzoPtaV1aug  
oa5QpEjzMH/vJdvnuFdo2Jbvpmv2LR/vBp2X/CqlQTl5zNL7h+C9mEj2/cs0  
zHqr+v1N4mKRz00b90IarktnnpFfxsvY+u4DyTk0rE/wlFqqwwWXZH5gOoGG  
sxHFecp6XHg4t7f4xtMgEziluNWAi07FRtvWOBpIrtmbHY250PxcceN0NA29  
m5vtjlpXcYotmCOchvx+tWQRMhdbPv9qz/KjQfj1nNgKChfjWsf8ZnxoSGm7  
e3KjOxdrh42X+3vTEM33vrBjLxfCoZ0fDT1p2JN7ojE5gAvSQN62IVcaHmT0  
2uQGcPHUI/HG2YUG00SNNI4wF+0PGSUNTjRo006/aQ7jgqOoceXUhouBizz



f07jYvrJp37SLhpWevl+HojkQk01ezvNnoYTzuVRE3Qu3Kflbnbb0iBi+2Pm

TwwXj9ccdN25k4b/AWLoKmU=

"]]},

{RGBColor[0.560181, 0.691569, 0.194885], AbsoluteThickness[1.6], Opacity[1.],  
LineBox[CompressedData["

1:eJwV0Hk01AsbB/CpLEklibLUK2SJ6MogzFfNxVtZUomylEjIWjPIvi9jGWrm

J1t2QqXbVaHXkkQlShfpWijqWkgl1EX39/7xnOd8zvme8yz/cfWzdV9JoVAi

yPp/N/o28CVAjEKjSHtfYI7o0EYzJms/MYdp81E6/vto6xDZKX+uhjlf4/ho

hbVv2oKeCYPDqcwl2sz77xOfy3dg/msHPYwpg2yHfm1HBOkOdrPlmatwx9v

ZiNlxUxxpV70qrCXBKSzq6xvPdmDtpD6HYMyG/CYGLON0zKD8E9R4/NMeVBW

3rqwWHAAcscfKH9bbkZXqUatvroVpIeHxgqztmCt5jWLxevWUDPeWSbopQgm

6wzRa3sQlktDGn0yKtjQ9P1quvJhcMJ3GvgzNWG3L/Znk4UDCjSHc7a6amFC

u3NsxbgDyocTF/stdyC+Z/XAXPAxDBVMjxZkaaOu2JmuVngc08t7S/i9dmJm

910hub+cINE8rfZCRg+bnfNWD82cwAbpB69q0vXAYX73+IbmScj6XWYl8FFh

VpqPm54nobSZPmUwQ8X+Vb0zVqMnoRd5ubawwwDf20RH7S64hiNTvVlGiMp

USU6xM0NWonqBTpzxlDcsvGaWo4bVvas4//OMMGf3zuK1XrcU0083BvKoEFH

pChBleqOZZPdd+gNQPvL8RPjv9xh4/yXrW39Hsznmk6MnveAYYy5g06PPSjN

LDPQK/KAUnlDvZTBXvSOfuOKP/XAj6nCLYN398K92MzGdesZFIf7TLvcPUNL

uKa77vEZzOYJpPjcMYN8Q03iLgEvjLSEGFvPm+H4TcPtvu1e6Jz4NKNNNUeu

eXFN+EEv5G9/cXT2tjmKGvykGLleMLt3RTn0tgXWVvjTqzW8kf23fmtS3T74

ePLRyk3OYvcm74WSW1Yg7gk4x+r74sE4Y+a/n60QLyT7KO6wLw5UR/E+q1tD

uNup+IS/L5yNuC93F1tDVc0pv6rCF6Y3Tgx5WtiAWu+Sn7PeD27PWfdWUA/i

rdUtmVCeH6qkxsN01h/C4Ktx+TVN/tArSF9id9vhV3l7WbZuIBlaM/pH5J0R

mrfw8lhveXz4YL16gv8ULBatAoyYQfhp2jstV38a9+c6xvK6QpAiPRRf0uiF

B14LYgxqGHZ9q08KqPZFhdBk35rQCLivTf7QqhGA3A0jzDe0KPiPLPAC1M5B  
RFh1W/T+aPj1Ka+l8z0g0D9YtGAQg7Aeo8n6ASbiPdUKmBtj8SiJ4PY/D0Zi  
lbVjPyUOazxunJWqugDtknNbK7vjuOITlv3nahi6evbqapTEY1OZTWRcYQQG  
7LenMz0TYFWnxpdtGIWV0lOjkRsTcWO+S7dVPxq0brtAiZ5EpHR1B/2jHIPX  
UX5qEv5J4I/+qiK0LRYigmc1rkglQ5AqfPPM1jjwzt9fCrmRjNjIGMtB0XjE  
p6c+S6Km4EqFrJ28KDMHYdOm05aCXA6SAYGLCQhymJwKMWHBVoHisfFtlnY+  
izfk1bIgiD660KbJGReblnepJIKM16o8eZnydDw2fZQOy0V8nNrFCKepWai  
xNv14FwqQvkzBrW6WOhdevSznNE0HKoIqJi5nYoBPkpRX3Uanqgyx+Lr0sCL  
3hbxcUU6mowGNbeXpEPkNYtfwDIIdVFudl0qpGej6rPLwbWY6KkuOzAbR2fgo  
2dQSN5C0wHem5qcb20h/Mi81IjMbtbI0GxPDTczXMJRdbDLwhvAeL7iZieux  
i9ci4zIQwZFwrVTJguh4La/4VgbexzwmcsuywPzqywkfz0Bm/U07abmLqP5Y  
FabJz4bQ66tPwvIugt9Gvr5Fhg16opwWa9MIRFdIulHU2bgX1LRRkX0JrPIO  
1ml9NvjsAxqLxThQiNXiGpuxkRx96G11AgfX7vMYGQfZ6NW0XXb6hwPGtrWT  
esfZMBx/720/xMHDlnd3nEiXZG8dtv3FgZDemH8c6fP8RKP5Ki4ULUw4z0IL  
jYYH6whzsdtftLlKQ37rP1f+WS5WKH/7QfhxMbIwvtvJakMuNnM0z466kH9q  
l3/6l4QLp7uNDEU3NoINwpx7Q7koXfGhHaQFrr36XBx0xW8vgygupLdcliQc  
o7ng4zTr5pK2cxW3b0riIkfJKUfCnY2WZb43MQQXeYebHZdIc6mfFoTruGi+  
4Nl334MN06sNSgozXGRX9lqJerNx94pgjeZXLm4zDfXVSWtzD/9mPMuF8vXb  
gmakFWKnTR0XyH0kl+3DSf90VHTJoRC484Le/oH0H+tSLm8QJ7BuKauz5Swb  
SseOomI7CZjk6l928GUj17eco6BLQHepzTKQtIT7NzktPQLN+V94KaQptmka  
loZk/sjvLxpJD2u0WrD2ELhwd1+wnB+5/6hqrOAhMq90XXCQtEg/Y430EQKd  
1gGqM6Tjuu5nqhwlsLpUXlvQn43AesfC348T6IvZO6tL2uoi+3+xpwiY6sIm  
g3R78jD9ojuB/LbOyjLSRIHqXcUeBKK+OPEaSav7PHjV6k1g+2SzHI900Slx

1+c+BFaVcsSXScscc37/2o/AclPylGQAG2ybav+ZAPL+4MJaNdKC5gvzv84R

UBMfOUYj/S/C86Hr

"]]]]},

AspectRatio->0.6180339887498948,

Axes->{True, True},

AxesLabel->{None, None},

AxesOrigin->{0, 0},

DisplayFunction->Identity,

Frame->{{False, False}, {False, False}},

FrameLabel->{{None, None}, {None, None}},

FrameTicks->{{Automatic, Automatic}, {Automatic, Automatic}},

GridLines->{None, None},

GridLinesStyle->Directive[GrayLevel[0.5, 0.4]],

Method->{},

PlotRange->{{0, 1499.99315}, {0, 1043.905439}},

PlotRangeClipping->True,

PlotRangePadding->{{Scaled[0.02], Scaled[0.02]}, {Scaled[0.02], Scaled[0.05]}},

Ticks->{Automatic, Automatic}] \) \!(\\*

GraphicsBox[{{},

{RGBColor[0.368417, 0.506779, 0.709798], PointSize[0.7], AbsoluteThickness[1.6],  
EdgeForm[{{GrayLevel[0], Opacity[0.3]}},

{RGBColor[0.368417, 0.506779, 0.709798], PointSize[0.7], AbsoluteThickness[1.6],  
EdgeForm[{{GrayLevel[0], Opacity[0.3]}}, PointBox[NCache[{Scaled[{Rational[1, 2],  
Rational[1, 2]}]}, {Scaled[{0.5, 0.5}]}]}]}],

AspectRatio->Full,

BaselinePosition->(Scaled[0.1] -> Baseline),

ImagePadding->Automatic,

ImageSize->{10, 10},

PlotRangePadding->None]) blood

\\(\\*

GraphicsBox[{{},

{RGBColor[0.880722, 0.611041, 0.142051], PointSize[0.7], AbsoluteThickness[1.6],  
EdgeForm[{GrayLevel[0], Opacity[0.3]}],

{RGBColor[0.880722, 0.611041, 0.142051], PointSize[0.7], AbsoluteThickness[1.6],  
EdgeForm[{GrayLevel[0], Opacity[0.3]}], PointBox[NCache[{Scaled[{Rational[1, 2],  
Rational[1, 2]}]}, {Scaled[{0.5, 0.5}]}]}]}],

AspectRatio->Full,

BaselinePosition->(Scaled[0.1] -> Baseline),

ImagePadding->Automatic,

ImageSize->{10, 10},

PlotRangePadding->None]) liver

\\(\\*

GraphicsBox[{{},

{RGBColor[0.560181, 0.691569, 0.194885], PointSize[0.7], AbsoluteThickness[1.6],  
EdgeForm[{GrayLevel[0], Opacity[0.3]}],

{RGBColor[0.560181, 0.691569, 0.194885], PointSize[0.7], AbsoluteThickness[1.6],  
EdgeForm[{GrayLevel[0], Opacity[0.3]}], PointBox[NCache[{Scaled[{Rational[1, 2],  
Rational[1, 2]}]}, {Scaled[{0.5, 0.5}]}]}]}],

AspectRatio->Full,

BaselinePosition->(Scaled[0.1] -> Baseline),

```
ImagePadding->Automatic,  
ImageSize->{10, 10},  
PlotRangePadding->None]\)      gi
```

```
(*-----  
-----  
-----next mouse*)
```

```
vn=readTac["C:\\Users\\exx\\Downloads\\TimeM2, liver 2.27975, GI 0.67125, ID  
3145.csv"];
```

```
Lv=2.27975;
```

```
Gv=0.67125;
```

```
id=3145;
```

```
vn[[1]][[1]]
```

```
{{10,61.14},{30,431.567},{50,128.792},{70,68.4927},{90,46.1385},{110,36.429},{15  
0,29.6229},{210,26.122},{270,22.9642},{330,19.7425},{390,17.1331},{450,15.9285}  
,{510,14.6797},{570,13.0568},{750,11.4649},{1050,8.90085},{1500.04,7.62609}}
```

```
model= mouseModel[Lv,Gv,id,25]
```

```
ParametricFunction[\\(\(*
```

```
GraphicsBox[RasterBox[{{179, 179, 179, 179, 179, 179, 179, 179, 179, 179, 179,  
179}, {179, 180, 180, 180, 179, 179, 179, 179, 179, 179, 179}, {179, 179, 180,  
179, 179, 248, 248, 178, 179, 179, 179, 179}, {179, 179, 180, 179, 179, 253, 248,  
179, 179, 179, 179, 179}, {179, 179, 179, 179, 179, 248, 248, 179, 179, 179, 179,  
179}, {179, 179, 248, 248, 248, 248, 248, 248, 248, 179, 179}, {179, 179, 248,
```

248, 248, 248, 248, 248, 248, 248, 179, 179}, {179, 179, 179, 179, 179, 248, 248, 179, 179, 179, 179}, {179, 180, 179, 179, 179, 252, 248, 179, 178, 179, 180, 179}, {179, 180, 180, 179, 179, 248, 248, 179, 180, 180, 180, 179}, {179, 179, 179, 179, 179, 179, 179, 179, 179, 179, 179, 179}, {179, 179, 179, 179, 179, 179, 179, 179, 179, 179, 179, 179}, {{0, 0}, {12, 12}}, {0, 255},

ColorFunction->GrayLevel],

BaselinePosition->Bottom,

ImageSize->{12, 12},

PlotRange->{{0, 12}, {0, 12}}\)\ \!\(\^\*

GraphicsBox[{{}, {}],

{GrayLevel[0.55], AbsoluteThickness[1.5], Opacity[1.],  
LineBox[{{9.09090909090909\*^-8, 9.090909090884856\*^-8},  
{0.0874367476365131, 0.08197166587636243}, {0.18222810297558026`,  
0.1358255024317191}, {0.27073779576926765`, 0.13315455086535802`},  
{0.3575112797365835, 0.08143316377978886}, {0.4516394623155443, -  
0.007347854733426912}, {0.5394859823491253, -0.08816932746972758},  
{0.6346872009943513, -0.13787329990112937`}, {0.7281522108132057, -  
0.12816574147938434`}, {0.8153355580866803, -0.07001063326902106},  
{0.9098736039718, 0.02121659675083076}, {0.9999999090909091,  
0.10024804094746914`}}}],

{GrayLevel[0.55], AbsoluteThickness[1.5], Opacity[1.],  
LineBox[{{9.09090909090909\*^-8, 9.090909090880112\*^-8},  
{0.0874367476365131, 0.08090369567458766}, {0.18222810297558026`,  
0.12746559200130417`}, {0.27073779576926765`, 0.1116266937044405},  
{0.3575112797365835, 0.046963725126600256`}, {0.4516394623155443, -  
0.04509050859182233}, {0.5394859823491253, -0.11115559892361665`},  
{0.6346872009943513, -0.12642564594664163`}, {0.7281522108132057, -  
0.07740196037964171}, {0.8153355580866803, 0.004179083230780074},  
{0.9098736039718, 0.08937493944143977}, {0.9999999090909091,  
0.12834702174618903`}}}],

{GrayLevel[0.55], AbsoluteThickness[1.5], Opacity[1.],  
LineBox[{{9.09090909090909\*^-8, 9.090909090875369\*^-8},  
{0.0874367476365131, 0.07984396759533968}, {0.18222810297558026`,  
0.11939549826670079`}, {0.27073779576926765`, 0.09184904274707059},  
{0.3575112797365835, 0.017913117173780694`}, {0.4516394623155443, -  
0.07109962300031061}, {0.5394859823491253, -0.11717052830989395`},  
{0.6346872009943513, -0.09879571259704382}, {0.7281522108132057, -  
0.022693471356141894`}, {0.8153355580866803, 0.06128703302641453},

{0.9098736039718, 0.11605625481609519`}, {0.9999999090909091, 0.10415981267620744`}}}],

{GrayLevel[0.55], AbsoluteThickness[1.5], Opacity[1.],  
LineBox[{{9.09090909090909\*^-8, 9.090909090870287\*^-8},  
{0.0874367476365131, 0.07879243663407876}, {0.18222810297558026`,  
0.1116081822210312}, {0.27073779576926765`, 0.07372482040530459},  
{0.3575112797365835, -0.006267252216927747}, {0.4516394623155443, -  
0.08743897872291118}, {0.5394859823491253, -0.11109134853087661},  
{0.6346872009943513, -0.06371549528296311}, {0.7281522108132057,  
0.02544576624054603}, {0.8153355580866803, 0.09464282937855747},  
{0.9098736039718, 0.10731931496853601`}, {0.9999999090909091,  
0.0516787429232188}}}],

{GrayLevel[0.55], AbsoluteThickness[1.5], Opacity[1.],  
LineBox[{{9.09090909090909\*^-8, 9.090909090865543\*^-8},  
{0.0874367476365131, 0.07774905743802465}, {0.18222810297558026`,  
0.10409673959866513`}, {0.27073779576926765`, 0.05716133039337165},  
{0.3575112797365835, -0.026084496726167965`}, {0.4516394623155443, -  
0.09591154799603378}, {0.5394859823491253, -0.09685594593277226},  
{0.6346872009943513, -0.02730376120671303}, {0.7281522108132057,  
0.061646715198529656`}, {0.8153355580866803, 0.1046634148537508},  
{0.9098736039718, 0.07509702498429204}, {0.9999999090909091, -  
0.006536873471333553}}}],

{GrayLevel[0.55], AbsoluteThickness[1.5], Opacity[1.],  
LineBox[{{9.09090909090909\*^-8, 9.0909090908608\*^-8},  
{0.0874367476365131, 0.07671378556951527}, {0.18222810297558026`,  
0.09685439581479163}, {0.27073779576926765`, 0.042069810325321415`},  
{0.3575112797365835, -0.042006785469922474`}, {0.4516394623155443, -  
0.09808544986431629}, {0.5394859823491253, -0.07760167026270944},  
{0.6346872009943513, 0.0063643674428021085}, {0.7281522108132057,  
0.08405712128907425}, {0.8153355580866803, 0.09555213349985489},  
{0.9098736039718, 0.03202960165577907}, {0.9999999090909091, -  
0.054402034659985464`}}}],

AspectRatio->1,

Axes->{False, False},

AxesLabel->{None, None},

AxesOrigin->{0, 0},

Background->GrayLevel[0.93],

```

BaseStyle->{FontFamily -> "Arial"},
DisplayFunction->Identity,
Frame->{{True, True}, {True, True}},
FrameLabel->{{None, None}, {None, None}},
FrameStyle->Directive[Thickness[Tiny], GrayLevel[0.7]],
FrameTicks->{{None, None}, {None, None}},
GridLines->{None, None},
GridLinesStyle->Directive[GrayLevel[0.5, 0.4]],
ImageSize->{Automatic, 28.4375},
LabelStyle->{FontFamily -> "Arial"},
Method->{"ScalingFunctions" -> None},
PlotRange->{All, All},
PlotRangeClipping->True,
PlotRangePadding->{Automatic, Automatic},
Ticks->{Automatic, Automatic}] \) Expression: {Bl,Li,G}
Parameters: {k1,k2,k3,k4,k5,k6}

```

]

```

Manipulate[Show[ListPlot[vn[[1]],PlotRange-> Full,PlotLegends-
->{"blood","liver","gi"}],Plot[Through[model[k1,k2,k3,k4,k5,k6][t]],{t,0,1500},PlotRa
nge-> Full,PlotLegends-
->{"Blood","Liver","Gi"}]],{k1,0.001`0.2`},{k2,0.0001`0.1`},{k3,1.`*^-
6,0.01`},{k4,0.001`0.2`},{k5,0.01`0.03`},{k6,0.001,0.01}]

```



```
Manipulate[Show[ListPlot[vn[[1]], PlotRange -> Full,
  PlotLegends -> {"blood", "liver", "gi"}],
  Plot[Through[model[k1, k2, k3, k4, k5, k6][t]], {t, 0, 1500},
  PlotRange -> Full, PlotLegends -> {"Blood", "Liver", "Gi"}]],
{{k1, 0.0142}, 0.001, 0.2}, {{k2, 0}, 0.0001, 0.1},
{{k3, 0.0022500000000000003}, 1.*^-6, 0.01}, {k4, 0.001, 0.2},
{{k5, 0.021540000000000004}, 0.01, 0.03}, {{k6, 0.0001}, 0.001, 0.01}]
```

```
Manipulate[Show[ListPlot[vn[[1]], PlotRange -> Full,
  PlotLegends -> {"blood", "liver", "gi"}],
  Plot[Through[model[k1, k2, k3, k4, k5, k6][t]], {t, 0, 1500},
  PlotRange -> Full, PlotLegends -> {"Blood", "Liver", "Gi"}]],
{{k1, 0.0142}, 0.001, 0.2}, {{k2, 0}, 0.0001, 0.1},
{{k3, 0.0022500000000000003}, 1.*^-6, 0.01}, {k4, 0.001, 0.2},
{{k5, 0.021540000000000004}, 0.01, 0.03}, {{k6, 0.0001}, 0.001, 0.01}]
```

Part::partd: Part specification vn[[1]] is longer than depth of object. >>

ListPlot::lpn: vn[[1]] is not a list of numbers or pairs of numbers. >>

ListPlot::lpn: vn[[1]] is not a list of numbers or pairs of numbers. >>

ListPlot::lpn: vn[[1]] is not a list of numbers or pairs of numbers. >>

General::stop: Further output of ListPlot::lpn will be suppressed during this calculation. >>

Show::gcomb: Could not combine the graphics objects in Show[ListPlot[vn[[1]],PlotRange->Full,PlotLegends->{blood,liver,gi}],\!\(\\*

GraphicsBox[{}],

AspectRatio->0.6180339887498948,

```
Axes->{True, True},
AxesLabel->{None, None},
AxesOrigin->{0, 0},
DisplayFunction->Identity,
Frame->{{False, False}, {False, False}},
FrameLabel->{{None, None}, {None, None}},
FrameTicks->{{Automatic, Automatic}, {Automatic, Automatic}},
GridLines->{None, None},
GridLinesStyle->Directive[GrayLevel[0.5, 0.4]],
Method->{"DefaultBoundaryStyle" -> Automatic, "ScalingFunctions" -> None},
PlotRange->{{0, 1500}, {0., 0.}},
PlotRangeClipping->True,
PlotRangePadding->{{Scaled[0.02], Scaled[0.02]}, {Scaled[0.05], Scaled[0.05]}},
Ticks->{Automatic, Automatic}\)]. >>
Part::partd: Part specification vn[[1]] is longer than depth of object. >>
ListPlot::lpn: vn[[1]] is not a list of numbers or pairs of numbers. >>
ListPlot::lpn: vn[[1]] is not a list of numbers or pairs of numbers. >>
ListPlot::lpn: vn[[1]] is not a list of numbers or pairs of numbers. >>
General::stop: Further output of ListPlot::lpn will be suppressed during this
calculation. >>
Show::gcomb: Could not combine the graphics objects in
Show[ListPlot[vn[[1]],PlotRange->Full,PlotLegends->{blood,liver,gi}],\!\(\(*
GraphicsBox[{}],
AspectRatio->0.6180339887498948,
```

```

Axes->{True, True},
AxesLabel->{None, None},
AxesOrigin->{0, 0},
DisplayFunction->Identity,
Frame->{{False, False}, {False, False}},
FrameLabel->{{None, None}, {None, None}},
FrameTicks->{{Automatic, Automatic}, {Automatic, Automatic}},
GridLines->{None, None},
GridLinesStyle->Directive[GrayLevel[0.5, 0.4]],
Method->{"DefaultBoundaryStyle" -> Automatic, "ScalingFunctions" -> None},
PlotRange->{{0, 1500}, {0., 0.}},
PlotRangeClipping->True,
PlotRangePadding->{{Scaled[0.02], Scaled[0.02]}, {Scaled[0.05], Scaled[0.05]}},
Ticks->{Automatic, Automatic}\)]. >>

ParametricNDSolveValue::fpct: Too many parameters in {k1,k2,k3,k4,k5,k6,k6} to
be filled from {0.0142,0,0.00225,0.001,0.02154,0.0001}. >>

ParametricNDSolveValue::fpct: Too many parameters in {k1,k2,k3,k4,k5,k6,k6} to
be filled from
{0.0142[0.0306429],0[0.0306429],0.00225[0.0306429],0.001[0.0306429],0.02154[
0.0306429],0.0001[0.0306429]}. >>

ParametricNDSolveValue::fpct: Too many parameters in {k1,k2,k3,k4,k5,k6,k6} to
be filled from
{0.0142[0.0306429],0.[0.0306429],0.00225[0.0306429],0.001[0.0306429],0.02154
[0.0306429],0.0001[0.0306429]}. >>

General::stop: Further output of ParametricNDSolveValue::fpct will be suppressed
during this calculation. >>

ParametricNDSolveValue::fpct: Too many parameters in {k1,k2,k3,k4,k5,k6,k6} to
be filled from {0.0142,0,0.00225,0.001,0.02154,0.0001}. >>

```

ParametricNDSolveValue::fpct: Too many parameters in {k1,k2,k3,k4,k5,k6,k6} to be filled from  
{0.0142[0.0306429],0[0.0306429],0.00225[0.0306429],0.001[0.0306429],0.02154[0.0306429],0.0001[0.0306429]}. >>

ParametricNDSolveValue::fpct: Too many parameters in {k1,k2,k3,k4,k5,k6,k6} to be filled from  
{0.0142[0.0306429],0.[0.0306429],0.00225[0.0306429],0.001[0.0306429],0.02154[0.0306429],0.0001[0.0306429]}. >>

General::stop: Further output of ParametricNDSolveValue::fpct will be suppressed during this calculation. >>

Part::partd: Part specification vn[[1]] is longer than depth of object. >>

ListPlot::lpn: vn[[1]] is not a list of numbers or pairs of numbers. >>

ListPlot::lpn: vn[[1]] is not a list of numbers or pairs of numbers. >>

ListPlot::lpn: vn[[1]] is not a list of numbers or pairs of numbers. >>

General::stop: Further output of ListPlot::lpn will be suppressed during this calculation. >>

Show::gcomb: Could not combine the graphics objects in  
Show[ListPlot[vn[[1]],PlotRange->Full,PlotLegends->{blood,liver,gi}],\!\(\^\*

GraphicsBox[{},

AspectRatio->0.6180339887498948,

Axes->{True, True},

AxesLabel->{None, None},

AxesOrigin->{0, 0},

DisplayFunction->Identity,

Frame->{{False, False}, {False, False}},

FrameLabel->{{None, None}, {None, None}},

FrameTicks->{{Automatic, Automatic}, {Automatic, Automatic}},

GridLines->{None, None},

GridLinesStyle->Directive[GrayLevel[0.5, 0.4]],

Method->{"DefaultBoundaryStyle" -> Automatic, "ScalingFunctions" -> None},

PlotRange->{{0, 1500}, {0., 0.}},

PlotRangeClipping->True,

PlotRangePadding->{{Scaled[0.02], Scaled[0.02]}, {Scaled[0.05], Scaled[0.05]}},

Ticks->{Automatic, Automatic}\]. >>

Part::partd: Part specification vn[[1]] is longer than depth of object. >>

ListPlot::lpln: vn[[1]] is not a list of numbers or pairs of numbers. >>

ListPlot::lpln: vn[[1]] is not a list of numbers or pairs of numbers. >>

ListPlot::lpln: vn[[1]] is not a list of numbers or pairs of numbers. >>

General::stop: Further output of ListPlot::lpln will be suppressed during this calculation. >>

Show::gcomb: Could not combine the graphics objects in  
Show[ListPlot[vn[[1]],PlotRange->Full,PlotLegends->{blood,liver,gi}],\!\(\^\*

GraphicsBox[{}],

AspectRatio->0.6180339887498948,

Axes->{True, True},

AxesLabel->{None, None},

AxesOrigin->{0, 0},

DisplayFunction->Identity,

Frame->{{False, False}, {False, False}},

FrameLabel->{{None, None}, {None, None}},

FrameTicks->{{Automatic, Automatic}, {Automatic, Automatic}},

GridLines->{None, None},

GridLinesStyle->Directive[GrayLevel[0.5, 0.4]],

Method->{"DefaultBoundaryStyle" -> Automatic, "ScalingFunctions" -> None},

PlotRange->{{0, 1500}, {0., 0.}},

PlotRangeClipping->True,

PlotRangePadding->{{Scaled[0.02], Scaled[0.02]}, {Scaled[0.05], Scaled[0.05]}},

Ticks->{Automatic, Automatic}\]. >>

Part::partd: Part specification vn[[1]] is longer than depth of object. >>

ListPlot::lpln: vn[[1]] is not a list of numbers or pairs of numbers. >>

ListPlot::lpln: vn[[1]] is not a list of numbers or pairs of numbers. >>

ListPlot::lpln: vn[[1]] is not a list of numbers or pairs of numbers. >>

General::stop: Further output of ListPlot::lpln will be suppressed during this calculation. >>

Show::gcomb: Could not combine the graphics objects in  
Show[ListPlot[vn[[1]],PlotRange->Full,PlotLegends->{blood,liver,gi}],\!\(\^\*

GraphicsBox[{}],

AspectRatio->0.6180339887498948,

Axes->{True, True},

AxesLabel->{None, None},

AxesOrigin->{0, 0},

DisplayFunction->Identity,

Frame->{{False, False}, {False, False}},

FrameLabel->{{None, None}, {None, None}},

FrameTicks->{{Automatic, Automatic}, {Automatic, Automatic}},

```
GridLines->{None, None},
GridLinesStyle->Directive[GrayLevel[0.5, 0.4]],
Method->{"DefaultBoundaryStyle" -> Automatic, "ScalingFunctions" -> None},
PlotRange->{{0, 1500}, {0., 0.}},
PlotRangeClipping->True,
PlotRangePadding->{{Scaled[0.02], Scaled[0.02]}, {Scaled[0.05], Scaled[0.05]}},
Ticks->{Automatic, Automatic}\]. >>
Part::partd: Part specification vn[[1]] is longer than depth of object. >>
ListPlot::lpln: vn[[1]] is not a list of numbers or pairs of numbers. >>
ListPlot::lpln: vn[[1]] is not a list of numbers or pairs of numbers. >>
ListPlot::lpln: vn[[1]] is not a list of numbers or pairs of numbers. >>
General::stop: Further output of ListPlot::lpln will be suppressed during this
calculation. >>
Show::gcomb: Could not combine the graphics objects in
Show[ListPlot[vn[[1]],PlotRange->Full,PlotLegends->{blood,liver,gi}],\!\(\^*
GraphicsBox[{}],
AspectRatio->0.6180339887498948,
Axes->{True, True},
AxesLabel->{None, None},
AxesOrigin->{0, 0},
DisplayFunction->Identity,
Frame->{{False, False}, {False, False}},
FrameLabel->{{None, None}, {None, None}},
FrameTicks->{{Automatic, Automatic}, {Automatic, Automatic}},
```

GridLines->{None, None},  
GridLinesStyle->Directive[GrayLevel[0.5, 0.4]],  
Method->{"DefaultBoundaryStyle" -> Automatic, "ScalingFunctions" -> None},  
PlotRange->{{0, 1500}, {0., 0.}},  
PlotRangeClipping->True,  
PlotRangePadding->{{Scaled[0.02], Scaled[0.02]}, {Scaled[0.05], Scaled[0.05]}},  
Ticks->{Automatic, Automatic}\]. >>  
Part::partd: Part specification vn[[1]] is longer than depth of object. >>  
ListPlot::lpn: vn[[1]] is not a list of numbers or pairs of numbers. >>  
ListPlot::lpn: vn[[1]] is not a list of numbers or pairs of numbers. >>  
ListPlot::lpn: vn[[1]] is not a list of numbers or pairs of numbers. >>  
General::stop: Further output of ListPlot::lpn will be suppressed during this calculation. >>  
Show::gcomb: Could not combine the graphics objects in  
Show[ListPlot[vn[[1]],PlotRange->Full,PlotLegends->{blood,liver,gi}],\!\(\^\*

GraphicsBox[{}],  
AspectRatio->0.6180339887498948,  
Axes->{True, True},  
AxesLabel->{None, None},  
AxesOrigin->{0, 0},  
DisplayFunction->Identity,  
Frame->{{False, False}, {False, False}},  
FrameLabel->{{None, None}, {None, None}},  
FrameTicks->{{Automatic, Automatic}, {Automatic, Automatic}},



GridLines->{None, None},  
GridLinesStyle->Directive[GrayLevel[0.5, 0.4]],  
Method->{"DefaultBoundaryStyle" -> Automatic, "ScalingFunctions" -> None},  
PlotRange->{{0, 1500}, {0., 0.}},  
PlotRangeClipping->True,  
PlotRangePadding->{{Scaled[0.02], Scaled[0.02]}, {Scaled[0.05], Scaled[0.05]}},  
Ticks->{Automatic, Automatic}\]. >>  
Part::partd: Part specification vn[[1]] is longer than depth of object. >>  
ListPlot::lpln: vn[[1]] is not a list of numbers or pairs of numbers. >>  
ListPlot::lpln: vn[[1]] is not a list of numbers or pairs of numbers. >>  
ListPlot::lpln: vn[[1]] is not a list of numbers or pairs of numbers. >>  
General::stop: Further output of ListPlot::lpln will be suppressed during this calculation. >>  
Show::gcomb: Could not combine the graphics objects in  
Show[ListPlot[vn[[1]],PlotRange->Full,PlotLegends->{blood,liver,gi}],\!\(\^\*

GraphicsBox[{}],  
AspectRatio->0.6180339887498948,  
Axes->{True, True},  
AxesLabel->{None, None},  
AxesOrigin->{0, 0},  
DisplayFunction->Identity,  
Frame->{{False, False}, {False, False}},  
FrameLabel->{{None, None}, {None, None}},  
FrameTicks->{{Automatic, Automatic}, {Automatic, Automatic}},

```

GridLines->{None, None},
GridLinesStyle->Directive[GrayLevel[0.5, 0.4]],
Method->{"DefaultBoundaryStyle" -> Automatic, "ScalingFunctions" -> None},
PlotRange->{{0, 1500}, {0., 0.}},
PlotRangeClipping->True,
PlotRangePadding->{{Scaled[0.02], Scaled[0.02]}, {Scaled[0.05], Scaled[0.05]}},
Ticks->{Automatic, Automatic}\]. >>

Clear[newmodel,fit2]

newmodel[k1_,k2_,k3_,k4_,k5_,k6_][i_,t_]:=Through[model[k1,k2,k3,k4,k5,k6][t],List
][[i]] /;And@@NumericQ/@{k1,k2,k3,k4,k5,k6,i,t};

fit2=

NonlinearModelFit[vn[[2]],{newmodel[k1,k2,k3,k4,k5,k6][i,t],{k1>=0},{k2>=0},{k3>
=0},{k4>=0},{k5>=0},{k6>=0}},{k1,0.015},{k2,0},{k3,0.0023},{k4,0.001},{k5,0.02},{
k6,0.001}},{i,t}]

NonlinearModelFit::eit: The algorithm does not converge to the tolerance of
4.806217383937354`*^-6 in 500 iterations. The best estimated solution, with
feasibility residual, KKT residual, or complementary residual of {2.3515*10^-
11,0.00940816,6.05773*10^-12}, is returned. >>

FittedModel[newmodel[0.0527839,5.86338*10^-
13,<<22>>,<<23>>,0.103439,5.86338*10^-13][i,t]]

{fit2["AdjustedRSquared"],fit2["AIC"]}

FittedModel::constr: The property values {AIC} assume an unconstrained model.
The results for these properties may not be valid, particularly if the fitted
parameters are near a constraint boundary. >>

{0.91686,647.345}

fit2["ParameterTable"]

FittedModel::constr: The property values {ParameterTable} assume an
unconstrained model. The results for these properties may not be valid, particularly
if the fitted parameters are near a constraint boundary. >>

```

|    | Estimate                  | Standard Error | t-Statistic               | P-Value                  |
|----|---------------------------|----------------|---------------------------|--------------------------|
| k1 | 0.0527839                 | 0.0156803      | 3.36625                   | 0.00156783               |
| k2 | 5.86338*10 <sup>-13</sup> | 0.000806056    | 7.27415*10 <sup>-10</sup> | 1                        |
| k3 | 0.00137422                | 0.000266321    | 5.16001                   | 5.38988*10 <sup>-6</sup> |
| k4 | 5.86338*10 <sup>-13</sup> | 0.00213886     | 2.74135*10 <sup>-10</sup> | 1                        |
| k5 | 0.103439                  | 0.0310318      | 3.33332                   | 0.00172395               |
| k6 | 5.86338*10 <sup>-13</sup> | 0.000295895    | 1.98158*10 <sup>-9</sup>  | 1                        |

```
Show[ListPlot[vn[[1]],PlotRange->Full,PlotLegends-
>{"blood","liver","gi"},Plot[{fit2[1,t],fit2[2,t],fit2[3,t]},{t,0,1501},PlotRange->Full]
```

```
]
```

```
\\(\*
```

```
GraphicsBox[{{{}, {},
```

```
{RGBColor[0.368417, 0.506779, 0.709798], PointSize[0.016666666666666666`],
AbsoluteThickness[1.6], PointBox[{{10., 61.14004499}, {30., 431.5668928}, {50.,
128.7922048}, {70., 68.49272901}, {90., 46.13851193}, {110., 36.42897641}, {150.,
29.62288759}, {210., 26.12204695}, {270., 22.96420572}, {330., 19.74247603},
{390., 17.13308572}, {450., 15.92848253}, {510., 14.67967832}, {570.,
13.05679289}, {750., 11.46493328}, {1050., 8.900847942}, {1500.0377,
7.626090752}}]},
```

```
{RGBColor[0.880722, 0.611041, 0.142051], PointSize[0.016666666666666666`],
AbsoluteThickness[1.6], PointBox[{{10., 9.900690969}, {30., 121.9072554}, {50.,
256.9307961}, {70., 330.1571994}, {90., 369.2922663}, {110., 391.2658728}, {150.,
403.4189313}, {210., 394.3913404}, {270., 365.8190912}, {330., 334.3196938},
{390., 305.3927002}, {450., 278.9301236}, {510., 257.3961021}, {570.,
238.9993258}, {750., 196.9610174}, {1050., 150.1176199}, {1500.0377,
114.4806725}}]},
```

```
{RGBColor[0.560181, 0.691569, 0.194885], PointSize[0.016666666666666666`],
AbsoluteThickness[1.6], PointBox[{{10., 2.436376182}, {30., 71.31339461}, {50.,
```

65.14284888}, {70., 56.76914474}, {90., 50.33244987}, {110., 55.19585284}, {150., 115.409251}, {210., 221.5997455}, {270., 343.7447076}, {330., 488.4982476}, {390., 621.6131118}, {450., 739.5938426}, {510., 836.5994436}, {570., 923.1110007}, {750., 1133.945564}, {1050., 1361.618281}, {1500.0377, 1541.014041}}], {}, {}, {}, {}},

{RGBColor[0.368417, 0.506779, 0.709798], AbsoluteThickness[1.6], Opacity[1.], LineBox[CompressedData["

1:eJwUmXc81f8Xx2Xvle3aEkohe7w/B9lbNsnee2+XFCICJfrKSkiSbMqtjKi0  
RLaMCEXliMLv/v66j/fjnPd5n/f5nPP5vJ6PK+QaZOFBSkJCUktDQvL/X7Xf  
w+shTCQY/ZeuA1Ofm/D1+nzdz8hJjOETi2zLQS4k9fGF1USuYMLrIm26j3Ig  
zf2bzjXNh0dipfMywbPnxTtrwWuY9lJuu1MxVlwdX63rqjvqSw/VR3Ujzx  
GjwODVWc4aIEd7yXMElqBuxs9J6Nj2SA9TsTZ+9uX4ZMu7b58lxmmPITEn/s  
dAmK2xgf0PmywsDj37lMcfhCbe7f6gGG7TVIHv1JqdAV0zb6VEuDujC9gLJ  
lJNhaJTxN7bGCQIVDptMVHj4ruzeXNHLDD2jz1HtYALQ7TGqh0fygaH06eSC  
oRjA2buTjBsLgMIzm6hq2mjgnJyYKckVhIKcl+s3LkSCYGaalmWiENwhvMkX  
HAgHCXXZ+1S+wsDzZ/4NOIeB7MoE5VMrEWjzcXjBQB0KqnfTvAM1RGH8efZm  
e28wG09PnBjiEgOmn4opUcwBYP0oLTod/Di4hffuStD7wYXzsr9U146D9vH2  
qYcnfMCbYdLs17g4PDMPu3vF3wtCOtLqy3ol4MocZY5vwwfEBsiyWTdIAsP1  
FPnT+u5wkW8yqg4BFwXlq76M00KtxJklYMjpYD6iP0rRztnKJKavCPieqq0  
67AcTgY4QcVk2r8vxqchXKZ6zNjcEUZ0uE/34KRB/uAhhZa9PUwUrX4typUG  
sit0RfyXbWF6uys7mloGim+ZvIgasIZ5kwINi0QZyCVdNKRTt4LVA617FL6y  
8AEfcu++uwVsWHNbfv0qC453DDoX+Mxhp3aVvM3qDMhxcbpXj5vCP8rupty3  
Z2CGVliv9b4xkFwo8PTXkINXwd5xjLcNgbwlkFOnRQ62Hbofr9ToAw3T2T4B  
KXmQIUkbGPimC6zPVyU+cymAtHOitsOTs8DB2T1Wk6UAPboibC81tIA3qODq  
ZXJFuFH8QK3mhwYI9gaqOccqgpKFvYX5IwBRgbMrymuKkP2NV0yIFgPxKO6i  
o55KENGRwNM6qwZSH1ZNVsaVYDrBvej2jAooJBXUlfQqg2/j09pqXUVQGQ50

iVVXgT8lJsK81fKAnT7LatmgAhMOxx6BhBycTePukpJQhar5MAruLnQ+7oa  
RIWsCoyLWyrvImTASLFbdIZNDQqSJTVMWkwv14w1J6hBn+vmEzuqJ8Ce+ys  
YmCkOhTHXCnrlZaEU2mSRTLb6hDsInZrTlkcSD8wU2xFIODcPH29xVsMvnDs  
+LVuIRic2+QIaheFh06TA3ER GKx5HzcPOcKc+IouZWwLg4BGvhdnnwmB5I6l  
WbIKQNdodG67lyAcINWWs+0AGHvx eBMrDhZda33F9gCeVDCpV+9ww8BlIX5q  
FQ14hF8JZ6bggmfvNz8txWjAC/LBXyOKHFD5nurS2zYN6ORweauWyQa5G7FK  
j3Y14EPhVl8h6VGI51j9kaWsCTQs42cKbrGAmdOghUWbJtyoYJDQ5WQEIRrd  
Srl dTWAIFcDih+hAtKK9jV1ZC5xZx2bpntMA4xupgJ1oLegX+dT36CMV7K6U  
CI62aoHt9w8aXISU8I2FbbD9jxZkVcUH+TqTw3v5tLRCpbNgf4v8hsQoKZQl  
BKxeaD0LP0QNxeIFSeBa6XSpxp+z4L34PaxyaB+L7DlnJaKkDRbHukTe5v/F  
nJdeUVNEa0Ok4vswuVdzJBB5dlCizakuX6teF64gynIPArq29GGzvBck/PD  
W5iglaBItaI0bHmJhf89s4ltFlJmBLTogKOq5WsV/XVs6kWMuumODjQ+5A25  
t/cL6/v2c01aURfCjnF23b65gtVT05ezRulCHme2Z5HjD+zuyc82m826cNLC  
7LeK6RKWbqZD92VbF8aCtGK0fL5joeFthBYFPch9TBP4tHle03lWfCyuWQ80  
mC+ImaTNYtLTrK0023qgu759LENkBuMhv3wNKejDn0uXuOcbv2Lk4ruYYKQ+  
pI0kPeOynMR+Gfr/PtKsD0F854fWBcexsaCvFXNb+lDmcOUVHdco1n3Dwr5H  
3gDcfHcL5RSGsfxxpZfpTQYgMgb3D018xliOH4b7bhlAROVc+XenAcxfREdc  
SN4Qrk+FXJU4+IhZ6+aOS0UYwj0F/qmXQR8wDT+K60xNhpBfpJclxPY003k9  
WnN90xCsrmyUvpl/g3E0/NgakDMCme9ZVWYzfdjy3ifHvEYjeHP5b91j/R5s  
kF+bOXrTCGKUftiu13VhBM3WLjs5Y4is70//otCJVXmeiFINN4Ye9TBL3OgL  
LDejSJKv0Rj0/9a6JHviORZfyj18NsYZGzT9toHn2GeA6k502dM4NpzBlGh  
h+2YKo/fn3sNjIA557bj+akZ656NWNP/ZQLd7Aq6mopNmNFD/OIvSVM4HsZ4  
fLmtARsKuzp9y9MUCCI9SdY29ZiTWT6IapkpjHY/j33I8AT7Tl76cWbSFG4o

Xe2A5sdY64LVty56M6hvLburEf8I03jsPOGjZwZZc10psQkPsMtHPUFUPM3g  
ndtyhkVDJfYmym+QKdUMLBpenDGlqcAYJ4I/zpaaQTdJICaXUI5ZQGR/03Mz  
MFBSTVijv4flcf1pU+awXmNxsWk5IjsnDq52+GvGYhQHq7wRZdg7p+uPjui  
aA53n0acrospxKrkc1oHLc0htWtoazLmDrZSkNdYGWoOE0nKSnt38zHZg//q  
YrPN4T6588uYuTws0rW0xrijWHFgts5PZ9G5h7a8qqgT7zUFnaGbk6usb2IFk  
TfnvJXPI4tg8P+WRi6X9bi4sOGYB7m9ndDw/XMf6bZ7l+2tZwLQo+7viG5kY  
870XNzEXCyA1tBMkx1/FLAV7s1mTLIhza2xQl3MFy0/tvzZfaAFLJ4oOeF6l  
YROLn9Jb2y3gzqIVx2uey5iQ8XDq1REL2JucNw7NTMWq2WfjZdjOwXwQ9ZFr  
3cnYasz3aHLZc8C9V9t04hleOzP1M3zY9Bwcv/22Nq41EYvW3AiuDjgHnjbx  
A2ez47FnFTv+CVfPwVyzc/doVixGQrfvfbgHFTJjXYmPYnGzgaReoj0ngMK  
nq7y4q1I7J0iw/nXpJbgnbthoD4ahrEWstoVClqCQ6aobHh4KGZNwmUVhCyh  
SuNP13PxEOy005+5pqMlvJao7itZDMKm+oSN2WMtYfyk5LI8DMCEpcT1F29b  
guDdPcaBW36YV46U9tMmS+g/uKS7c98HW7NTUndZJ9pbVwfnTnpicgR1ZTKm  
K3ipu9/VftcdixHWkqeSsoKJcMoOyRNuGOGynsyYgRVcc5c8d3/ABSP9YSz1  
yNsKVn7krmvlOmM6puck8JetICvG6G/fRycso8H22LlyK3C/nR3zq8IROxrv  
xrf71QpE+1NNqXpsMdtph+7+fSsYlrS9MkRlgxWeDWQv5rUGrTMCDI99rLDP  
qjCWUGVr8Poi0702eA4TZYhh0Laxho0ffszsFy0w75BEGq4la/jvVkickvYI5  
9mjoIsWPXGvgoBM5s05ihikUZe1nv7eGFdXIE3UPDbGHZRty739Yw/Nak2P1  
XfqYYKW1Px2NDWRLhJ602dfF8h6239MTs4Em/8hQK2sdjK6Of/ySlg1M97Gs  
+fafxfCNKaxdzjZQEb3ZXnxeC9tuXdAnSbSBzWdnr4lSa2LTL2tbY1ttICu9  
zUrgLIZZvWjdaxmyAec5o/JunDr25k3k8a0NG6AcPzwI5lXF4MOYkyyzLdiS  
qoW4qStjTZ9RXpCULUQLS1lo4xUxyZGydzUGtiDW78U+MyOPIUxQUix72UJF  
cGQTqbMcljH/Psy9zBYCBt8WCFbLYIdLsg9Ln9uC1MV5oapQaSx8NW92asIW

vDfcw6RKT2HLG3vcuD1bSLppz0566SR2Ycfj3I7TDsxYZIwEsySxwb+d6Xly  
dnBt1v1wvE0cMyA5/uKzuR18PDVa8priOCZH8+uUyTU7kBHCqxnYEsEeMJzz  
vPrADoo5eyl/3hLG+Flb7va9soMG0UBVRhMh7CYH7xDFNzvYp9bc/oETxGh4  
k+i1jtjDlzzM8tYRfixRYE4Lz28Py3x9tu5rvNimiG5ch6o9zD/ZftVMxoNN  
nWRaVoy0B3qOaq0PmRzYOZkwoYgb9rDra7j+75AN65Mftq2vs4dRvUCoyjyK  
IRXV7F/v7EGXIZjppxwr1oCKe0/+sAcLtoPKb7+ZMXEtskMfagdwLolsfpPD  
hBXpeilUHnMANbvsn0weDMTv4+n7Qs4OEHjyDqlVPA22b3ljwinBAd4x2dB+  
b6fCQu12jhbecYCuBLfPlyU2OJ5B8PRFgdolVvLG8wlx867Pk/hGHIAspey  
CxLiZNiAp0j7uQ0HOJjkcsnjyxFMzy9tPZvJEaaHPLG+/0gw2XBTZzoDR/D/  
rfLdv/8fqoxuuK3n5Qh/j3jdb/m4h3AJnB8upTqCQVOQwPudPyg30Y6yq9QR  
2NosFwOxHUR1+as6yXNH+IIZE+Dvb6H4DK0I9QIHWClajvp+fBntZFXWxO46  
gkUYhfeV7g00cTuId+vMecjtIX3ioL2GzAs/W8ianwfdDLYfB0ar6FWJYkZQ  
4Hnl+/s7a0zhJ1K7/9/Lmqvn4a/R6Iqx9jJ68uDwz1LVecA+u/SsRiwisVo3  
6eOvzsNTyjHRvFcLqLC+18t97jwoL5r85pWfR5efXv8yxecEysnX6kXcZtGv  
v1FxeepOILo38v0E+QyyVXMWNDnvBFUFuVu5iV/Ry3i9HooEJ9APfTcecWwS  
SXZI+3YUOsG3/fc0hN0xdGOfiynimRMwRfGZcOyMoH/qRxpPTjhBu/rOmTae  
YfSB8Gn/P94LQPbk7w7Lm89I6bCt7JzqBciPpMGtmw2gMqxMl87hAqS22J/a  
/f0R0eEzfnbGXgCV9nPCd10+oPAXoTmxdy6AtkzryyC6d2iSxEFBtv0CVBWS  
ptPOvkE6GlrjS6MXYLrbopNhtg/Rz1zJraF3hip5I8U5sx4ERw7c03H080I6  
HXVcexeKEApVdD/pDBYHFR6pmp2oWmOBbtScgZnB6D5h4QWacrGf4DVyBs22  
4x27+s/R0ZT3tTsOzvDcc132/fYzpFemmFzZzxlOsD4zjP7Yjp7MSopdvUr0  
X6+a1/rXjBZli/94/ucM/ybsG3x0mxCPyNG3mg+dQeFGoKNyQwMy1Uq7y//U  
GbJ/5DYPq9ejVLe/QXtvnInSQcm4+Fsdar0YpPllzBnyLEpthvQfo5V7c2z1

y84QrHX7qfifGmT97W2bD60L+PY2bep8qEIZ5HBNm8cFNua+s4tuV6Dnoo10  
QpIuQOGODNvhPto8Ky6zr+wC/N9C0dTDe0jco5BsVN8FakmwAne5MnT+EvOX  
RjsXeNzj9O32cAnKvZ9ale3jAj9/Ks7nSRajv/P+xnpXXIA3nc+Osf4Okqac  
ERAtcIFSw63Y2aZ85C5mtXFY5QL6TLVHN6fyUIH06+7xVhcg+TV7VU/yFnrv  
qX67pc8FwvQS2Fpu30CkaU98boy4QOfyGf2borlIsfKYWtCiC7TUBHkeeZ+N  
Sr4zzlhRu0LZ8Jl8wS/X0CBVSgMplyu8kWrkWXqSgWjEty9NHXeFt4+FPxY+  
SUdlz9e2XdEVuCUvu/KMXEah3IOSebquUM3QNstocglVplvsh9i4giad4M/M  
6xfRRNWrD8ZerrD7WcDMhycFaS/VhlOkucIV9t1+jYNEFEsjojuT5wopVib4  
XxXxqFbiNndHhSu0xhsczUqIRXP6dD/zm13Bs1evdTwpGnH5JhHCXxHzOS98  
xbM6Ehll/M42++IKPN51xc92w1FytZfbyQVXUGHSZ/f3DUPLY6bU3yjcQPBU  
5JBLWTDS2Vz6UcfmBgd1Vlm/tgJR2f7FDwkibmBJUav06rM/OqDkbzCQdYMB  
oT4ZpWO+yIG5NY9Tww1+sPxzG6f0Qa3cFrHfTN3g/b/R++8svRCbyM/zT5zc  
oNwoSnrghQfqlxc8ZhjvBil9oweJC65IHGun5rrqBvufHsb9KnZBqXqWP78V  
uIFoSBXf3RBnNG2++uFJlRvQ7WjBXL0TUndIb0hscQODzKH4R9WO6I678G3D  
V25gbFbt5f/KHm0HPiVlGnID6x+eUb+P2KFa/JpG/YYbwBboub2zQrQZGceS  
jriDavT9tDdOlsjzhiiNEbM7jNZZdqvQnUOdHYSfXALu0H/iV+/lj+ZIoML2  
47yUO9RFsDsm15ih+McbDfVq7lCg8PHmnrIpGmm9djvJ0B26LJja7mDGKpvt  
CyduH3ew1W89Flqj3402msuRLlDtzxPqC2vHtKb2jzWcNkd8v80ilSX66Dy  
71k0+Fvu4Nr9gOSDvjY6si6+YITuDiVvuT+coj6LnPY6P3I3uMnfELOSmdRE  
7WTnGxdeugOHZzoteqWBQjly4vBf3eG8p//XpnIMvRc4ccF41R0+z88zFCyq  
I0mJHk2efXf4efVCapSxGrose0Hs050HmM1MXRP/qILmVHdpGnk8IDfQJ+Ri  
gDIC7RsreAkPiHhGHn9BWakVmkh9MlbygGBEVfjxhwKydHHJ/27lAc3/5S+z  
vZBddb5/4xrdPaDL79dqd98ZRB9+60JymAeUu7+mjp+TRd4Jp7VMUjxAa/Bl



QTSjL0q5/FqMN8cDEqnDyXZ1ZZBwthvtYrEHGJnGVapmSaPEgv2VxloPkLV0  
r2R+fhop1Mg0mfR7wL9oaY4AQymU2/Q2n3fcA8paZjck5E6iVYJH/OKSB9yg  
Gre4K3MCGfQdXmj64wEPv37vodaURJWfCrRSqDyhoXl4/JGbBCIfP3PclMMT  
bpPFiL6/KY6cv72jxR3zBBX106cffj6OuHaODDRpesJRcSVni1gxFE5S2JRi  
7gnLKkfDHWaOoY80CgWmzp7QyuJMjMz5DJ08+jEeF0SM9+unf9UnUXQF5+u8  
lOAJtzjTmUZtRdHCMfKzzdc8Yaj/UL92UQRpni46fvE/T4i0EI7jx4ugPY2B  
VVybJ2iF8FTsdwsjM59TNMdfE4KZ2Sx/gp8wqsjOEJEZ9YRnRV+UrbiF0b+W  
BXXVJU94sRBD1f5OCJ37qmmrvesJ2fUm+V/ThFA1ZXGoKY0XeF8b/rerl4RI  
Tv29ZsftReTPih/atEKoJr7hZYCyF9By7ca5FQki0nKmiSh9L3As/70ZHCil  
bN/6bSfbcH7GzfPIWoIlgoe0RN5MV4Ao3LCNZMCyKnl5k1CmxccDR803i/n  
R41Ta7V9r72gTqzo6LFz/liW0vj1wKgXDM1sErB9PuQs9WBUySkL+hlSecjK  
+FCLjCXBwq4XDLNuvhMFPsQY78K1TuMN2nYrePsv0OR+r0P2L7c3eOpzjdu5  
4VD7G25jCklvSDDkSx2Z50XMGxFeTCreMnHbLnLNkRd5cg8kcxt4Q40YjYvk  
Kx70DE4Vith7g/vHiW/eQjyl1TujWcrXG6Slpqz2/bmRz/WFj4qx3jDyFKG8  
qJlLvWjW/KGR4Q1s2tMPQ75wlo6pIlgqj094wWcyWUX7AgTpP2qg4t3vDz8u3  
72upsCMuywZL3zfeUPfjzgc1YzYUGMcUFD7mDb++aFY/tj2KeN/03kvf84be  
9SUDnC0LCl0XIeTS+sDU7t39MkNm1MeFHynk8YHt0BfhsQGMKNxLieGjig8l  
Cm5YX5unQW+ybh5/auADdIfUBRcvUyHB5jWNHnsfGKplKhtio0DvyB9Ejsb6  
QHVPUItr0N1sTLu6SNPfwDkxLseAfE59fjXEXt0b31gepFiZfNGv/rA2ic2  
jnEfoM95HhY60d2RhGXoS/71gXQZKsdBudWOkYm9egtVX4iX5FjcySQjnCK3  
eedo6Askiz3BpV6UhnQTDd89HXxB1z6Up1WkhiAT64eLi/OFFsbD/0YjGQnp  
pb0Kl676wizbc//JWGbcVJ+I+fX/fMF/6L8jDjUshAzOiUv3nvrCvT7DsHMz  
Rwm7Wd87XN/6Ag3lQpz0FBvBm/L3ltC4L5SdfCV89zU74UvCgdTMsi+sxGyZ

3S3jIGhv0XiW7PIC9omEX3LenIRGf/aiC7R+QJ3k+d2Lm4sg/E3wCz+PHww/  
aRdSaeli5DicZJyS8IPCIxfTHqtwe0g+K+rcVfaD0Yd9R/qruAmBBlqJjvp+  
0BO55Vt/wE2YfGnSzGvnB4/GbhizqPEQjTtV8e8/eDxN68KDMceQnudh9id  
aD/gLdRyGvXhIUilhzjZpfuBLvXu+WBbHkJ+cXweV74fXJS2z9qQ5CFQcqa/  
H670gxM45ZHIaW5CRNYNytstfnBpwEuULZqb8I2iGFn3+sGyfavDzBoXwSKh  
OpJ92A9anv3z3NLnIrrzcbKodXPADyUPK014pnARp/5cLN7b9oFjiQaFxAQeh  
aK6f/xylPyRoNeU/z2QnMDiMWLNy+MPGuX26QSc2QvzAXNanY/7g7nruaynd  
UcKy/q9X2fL+oBZ55S92g4Vg93LvwFTbH9Sl5nIzlpGIfUqUikxW/rB866lb  
jhM9QaG0Jei9uz94yYNq50Vqvw3jffWZ4f4wzs3+w8CGnMBWLP7VKNUfzMqf  
XamvPexI4ZDjpL/pDxIjSXIK5NsdzhSGaRkN/kBC/7nw6717He/jrZ/rd/kD  
/sLDi9oXFtTVN112qD8T7UZjZ02f76jzzEV7pW34g3TamPyzQhp0xT61Wic0  
AIK/uiDsKjP68+n6MAVrAEg3LIBdSGBDQy8qdFNliPaTAiTfHzorFJ9kpZG  
AODWqzjggyCqf9zRQmoeAM6xr5VDIURQdtHg8eTgAJiQFHB75iaODtinLwA+  
APrGbnhuiZ1AAZk/bh9eDwD/t4z15jSnkEE8KXXi4wA4CW8ZxjlkUdtvBlB/  
HgCLniH/BbWeQeJ+3NH/3gfAhoL9m2ZfeURhL70YuxoACw5naBJlIVH4J1VB  
lQNivliu21mLKmhWT9d2lyEQxF8OdYdOq6EXik59UVKBEKE2Hed3EdCpxz4k  
iuqBkG+JI/y+o4HuikUobRsFQryBssn2U00Uy36tKtw/EJ7daPqyx6ON5H+3  
pYc8DAS+f+yHm2YGqP/cj09C7YGQRuMd3FdsiFwbcbwDfYEgt2hp07hjhP6w  
mbinDAeCrXg4tYKdCcqKSHokuxAlwcfCBXnaTzHol7rt2c1AOGhS4zbGm6Gn  
CrPYDbIlgWE/46DHFal4sbh+9osUaBG/khX95JZujxZ2zA78Fg6C3yqk2m6iP  
Em0jectPB4FSWX3h4aY5YmurdLdEQeCyYtDg8N0cVXOPPiI3DoJ0K8sfhiXm  
SCOWdqfRIQi+3/+rHsVljkBGVMHDNwjel+ldCtQ3Q4GqAVfYY4KA1u+LhGyO  
CSivLBroSQuCYArJwEpzi3Tn3wfeyLwgSHr2zzTquz6SPn/EQ+x+ECwoPted

8NBFrzpka780BIG1wOw75umzyJHffedyZxAk8nyxN/RRRL8Tb4Hij+L5H+m8  
BtgAZXx9deX71yCYH/w+VPVDFQnCn4Hbq0Ewy3fQIYApoeYSCZzefhAUV3T6  
+8rJowr8I9l/FMEQvshflZohi9aldWwsGYKhhy8y4CqSRmozU3E1bMEgx1Df  
GlnZeqXnRJWQ44LhXk+deG2tBPqswdzjKBIMrfM0vtLXjyP+jaqlRslgYF6Z  
ehpvj4Z8yzQYGWSDodvB/DwTtxhqshiT9VA0hr9PUjLdR8UQCVmYTQcEQ03Q  
zat/7osjwwa6eHa9YAj570BbyeoeEynMrLwkwDQZN7pRv4ldPoZmj6j091sEQ  
ZEfzfZRCBp3sHlricwqGT1wud1zfyaKo8EDGSI9giDptfl80UQ51ilKdee8f  
DEwps4Ice/KIcajYRiw8GPy2+MSkRBSR3SWl+MS4YJgPoH9/YVwRlct/KvmS  
EgwOH5tlysmV0Nq8T8+pjGCwFFxJvJuiFTzSjcv5wSDHvbP+8oDBXRZ5z/G  
r/nBYN9CwuqXJo8+bZ85o1gSDPzP0lmvSskhXGW/zfXKYBBPFiYzqJRF9VQH  
JVhzMHTKpUuZXD6F9lvyem53BEPow49D9H8kkZ736eVf3cFghtUKM/ofRze5  
+hj1+on1tFHXPrrgr72OZ8p+RwMA23H4iXrBJFkzK7Nn7Fg6F2Zw20p8aJI  
idx4s9lgGDlneyevZ0cvRyVLq5aCAU+2FRpFzoLoM7p6SNaDwfyPtDvZe1pk  
o+K4bPsnGLYMjdrRShR2flm45NDYr2n8Fv5MeRo5U7mGRqqECD1kPsvRJOS  
KRmK2bowhkBa3uAenQgtuviXEN/GHgJ+w71RrL2M6P1Dm1IWvhAo9erGFf1i  
QTyOaz0+oiEgefT1mZjsNuRbf2X55YkQcNJ4zOYnxllq36ZUt54JgaIFZ36R  
Gm60nRHv+1g1BJ7S6Ml29vEiZBApWaEVApTp0oNrznoMk3wcqFhCCSUyXLm  
tPGj930+1TfOhYCHIX2m2ScBxJHu5pvhEAJKN8/7Fpsllifd85LjbiHw0Lyx  
R/6KIKqgtFm08guBb2JPj//OFUSrPWbVgWEh0DEcd+GCpyBSuGTg6xEXAv6v  
mNjHyQVR4tmzko4XQ6Agc0RYRVQA9ZKhZYurIWBK0SYluNHZF2K1fo3QqDb  
qtS21oAP2abI+MJ/IUDofGdUGY5DJRonJBXvhcDre7nbH17yokWSY8tSD0Mg  
0zDxyUkNXiT9gr9atCEertR5Uw7/5UHRsvy+vE9DoKmm7GPWJx70ArFKsnaF  
gHUKKE+2rdh5EfUC3TP02BDy5znU6tvAgsw6K6sOBEJiyYqE508uD8uMPfbbH

iPUTWI0RX+ZB06q7EiuzIbDlmonnF+RFEn83luaWQ0DgTJrfLy9eFNr+88HY  
Rgh0+ldppjTxovaYBZ9PeyFwq+6UqgApDpEqT0v0kYbCI9/Dwmp9HDL4M7pE  
oA0FTiqSOup0HMpt+fygiTUUJtbZn/G14dBY5DufGp5QoLktRvN+BIeEFXol  
7gmHwjKuRbNjDod8t14sFUiGAu2fV/WU33CovrH9QbZsKBAyfgy8msKhvbBG  
nzSVULh69w7Jt0Ec0jxTK5GoGQrbf/R3tHpx6OpG5VK4QShc9Aia6m/GocEn  
pQ/8LEKh7SG+070ch3Ah//m42ofCdOrK7EY2UX9L35Kwcv2FhRsRq+kJOFTz  
K2vJ1DcUsnwraE/74dBmbfoDndBQeM3Mvjhuj0NqgSk+6rGhkJ5lrXjZGIIdS  
pell5FJC4dmPwyrRszjU/zNiSTIjFKylK1YeYTjEVhP0QCg3FPiHDFiYNXDI  
0c/Hh+tOKFgqaj8f08ahckk3CaayUFCTaDyyaYhDK0uOSxTVofDpp+3zU+dw  
S0GB9YN/T0KBqXtz6rwDDiV6m/n8bguFtTU9XUt3HGL8rrU0/ToUrpwTyJyN  
wiHrCvUHw59CQYIBVEkwBYeKPBR93o+GQozowqvgazi0lCoj0TMTcG5ZVYxj  
eTh06pvk0t0lUEj+E6s0VYxDkfdEH9Svh4LpxFlhkyoclrjy+zzYDQUBds3J  
rMc4RCnMJVFyJAx0EmtjnZtwyHSGZSmPjgxwv3voLhKfb34J3YNMljD4Y9Jd  
2vwUh6YvUPikcoeBTMC88VPiWlZgUDxOKAz4JTyEzln+wVN/FkMkwoDZks2q  
rxGHjHlvycxIh8Hjt7/PfyGeJ67DGmumFAYCdc9K3auJ8R6doDutGwbvDdOP  
ZhTh0DOX1nNFJmGg+lrfySofeD67diGDdRgMY6F8+rk4ZJbgJPXTnZhPeYRs  
/WUC0inzl8LBPwxq7JjuxyXjEPV8FOFNWBg8aacKexKPQ9/yyalU4slg080B  
Uysah14Y5Zg+SCHuj8ob0CLOayEJfz5XRhicCNddfRWMQ9GN1dNpOWHgF7zf  
8DUAhyy9FSV28sPg73ndgFji/0jjukM8S4j5n2p0E/DFIfqPZu1DIWHA0Taw  
7e+DQ4sXJ0m1H4eBmKrsqbvEdbeir2Fjcxjlv5kZ6CH6l/zYviFCCAP14f/2  
M4nx44svTuT2hMHx5nEjk1Acjs3Hflz0HbEe4l+VDoj5ylHdDQgZDIN/a3PK  
t4j3Y34q0Tw9HgbJH4/30RKf/8/A5gPTOWL+VxYdrIn16hPW0n2+HAZ9E24B  
QRXefvzy4fqpjTAQzxwONybODz7DceTubhhwOyYvfyfOlyNaEmQ4Eg6+dMU6

CuM4pLQR4RNPHQ6LjoFHpNdwaM3u+p49ZzjUrHCFkwnwoX4GnNYb/nC4XheE  
61fiQ1Uvq64qi4XDGC6InN+SyMsSnTgueeL+P07hqt5kNqkiUeaWjjo/nzz  
c6uWD3HljD/a1goHg+wvlzg/8qGPfzbrkEU4RK137QVw8KOamuS0s/bhgGSF  
enNU+VG6M+PHBpdwmJNkv7Xnwo+g77hLbnA4UBi2csTU86062/YXTbOI/jE1  
wyouAuia4fe3hFvhcOshfvj2dQHkfrjGdupuOED56J0tggAS9Mq8T18TDt+j  
0iv0mAVRtsKL3tevw0Ga5YSWVJQgCho6Rn+WlgLExPV5mqyEkK1MxlwmfQTc  
6421SA4RQpC52j58NALIo0SOUWUKIWbtFh8/4QhIZXyt39IphP6U8Go0SUTA  
8biOsLsTQmj6XxLXoXQEtJjwLTZuCaG6Rr3eXCwCHl5YvfBLVBjlMz8qmtCJ  
gJwOF9X3KsII788SKWYSAf7qkizWpsLluy/CONgqAhJKtd65uwojc9Ex0XbH  
CKCpeeAwEiaMVPDoH5l7BjgK2FZlXRRGwhNln439liCrw6DYI0cY0SpRPbwd  
GgG0+gknVe8Ko40bfikzMRFAmfpDdaVCGI39+mB3ljkCOqVz2uxqhVGnoZxM  
RHoE4Fl8c5wahFF1ZT718+sRkLIY8ni0SRjdINv/Sn2bGC+6/LCKuI6/4Nji  
URQBtin7AdX1wsj9aU9W4f0IePw6euFpjTAy4pT0XKiJAHNmVqun94SRXFiW  
unRjBCRy9dy/fFsY4T5ssMU+jYDY8szuv2nCiPyEzc+uzgi4H0l190+4MPp5  
+WkXw5sImDUzwTk4CaOhWYH/bD5FwPstdakjZ4URAAWGl05EwLXjss/6jgmj  
ijul+j++RoBnlVjTdTJhlLVtjCT/PQLyVDjJ5SaFUKTFkz+JqxHgXHJ480a9  
EHKqZf/Yt0WsR+H4uWsXhZAObWwl634E9P2qOPnPVAid8pxKdCSPHkXz5+le  
cgohzk5N6wq6SCit2htvHRNEJPyVUmuskaCSG5vxMl8QLcbQUajwRMLBxAhp  
m7kgapUZbHgnHgnr6hjpijCAKslUusopHQnBGqEl31qJ/b1U60qiGAl631WM  
5v7yoWDtIyoPUSQ4o2mPrdNEfVHqwbKlHQlrpp9stS1xCPZfLyJjov+xhOx9  
4vdc307Ui3TlSKjqtYjW8+VBu8w7gTg34v58RUUpQ5EKz/g46nr6RoDYqelGD  
hB096XvOVxcSCZb0f84nNbKjelHRrd3oSOhXESQVPceG7uDT+7XwkTAdQD9u  
N86KUIz+3stMi4SR2hOWhkYsyFfjPG44i5gPw9gTbQMmpLLGLel3l3gflVFP

Bw5qJGyUeKSpnOi/UknwkyJHtFWzIwcPI6GEefHKfwwkaPzCw7Tc9kh4IWJr  
1pDxU737KdOFiZeRADgSyhelA+o1nOEKYq+J9i0aETPCUEf8B7X5tuFI+OjK  
k3OW/2+HiwqpbdnXSMCbiISZfCUj6NzvfZPxPRJl7ie/3U6iJbDEWdQ57EQC  
zh9DpefZCNvznCJnD4n1+qiXzibFRZgwm7x1kioKJFG1KI0EjlAh5h23zxEF  
2dmbvY5WwoSrOVKr8/xREK0DiYYFooTgfvx078WiANsJiSvcEiOoDCToFCtE  
QTmmsXh59wThQ8INfg3rKDi8MRDQWHSG0LhomyrhFAVmSv9dq5aQJ9w5x7/D  
4hkF8zYUsac6FQhJhDmfvYAoePN7ferQTIngLvFgYjYiCg6elShRPVcm6N8M  
NH2bEAWWZCtuq39VCKcOz3Q2XIqCCo569Qs7qoSjvrtyhZnE/Tpvy8hK1Qh/  
BgmVqbei4Nbc0eBLi2qESSyVJ+BuFMyoEaVkdagROqv1M63uR8HFspLmPiY1  
QhU7Ewl6FAWC7v8tTb5XIWTiB0PFmqLg8Z3SdclVJULoj4J5xo4oYNiykPpc  
qkCwtb5gu9MdBcsJw+nfGOUIwieX1fsGo2DP5+/qv9cnCVS3H9fVTRDvf951  
5fUPMcLPIxEiBd+iQGC6eXxaQlgw4K+Sl/wzCq5GsRthOE5Cy/Ahte9mFCzt  
EmayY2glhZo9cRb/ooBEJe5Xb/qPjpRHGasq5NHQfcyGKoV3Q92Ly8xFhD4a  
8rHxyfZTVMjolvsgHVsofHmRWO01wIjKvSd0NnmjYtd3ckVYgBNx2JW0TYhE  
Q1W800a90y/61+VxsudENJR9swpRzeBHM6dOFD86Ew3aXPSswaqC6FXBGkue  
ajTcm/vnMpsuiGrIm1MTtalhI+34JUohQZQTFLfjaRgNtwP96yZW+VDkGPia  
nosG6ynNuMtMPMhBm3JS0SEa+ttk4kql2BHUVtUVdluGUL4hEhZ7JiTGm9NJ  
7RcNzbTtb1ZbyBDdZWv59dBoqB0cY6kSXlNfW+OtGo2NBnEa8QS15eGOLw4z  
PJ0p0TD9xPLmSO1ux9NXFZnVGdFwRfh5SNk00aFExp/kRm40mDGkmofG0xlu  
FcqExd2JBtPeAjl3RgaCL9XOvFtZNHwLiP1prE1PMA19ZmtUHQ2NRg/I1a7S  
EOQmk9/K1UcDV0ZDRq8uBYFbTxfxtUfD4lAK6b7mYcdBPf0Tis5oMPLeHppM  
WO/4xjcgsv06GvCnj5mPDrZ2vE6/nfflE9E+MdJ+W2NNXXPxV47iaDQUf0jh  
8z12BD3T1cvMn46GKE/DpAtttEi+siR993s0PI/zmqpxYkW1lLsX7X9Fw+Tz

E/VHL3Gi457mSU+3o+G+FfbK6K+Lel5EIs7iAb6LofWmSxBxH2MNDKBIgaa  
XCmlvW4Jo9xU+5Ap+hhY7vpw1goTRXTf6v0xthjoEnToZog6hlK16LxLeGPA  
sYHOc0NMD02XubkdEYmBD02DC+7KYiiS9JmTq2QMTN3C5bK1H00/XNjsu2Ri  
4ItebD091THk/dLlSIQ5Btblto8LnxFFM4I9ZpcgBozzH1JzG4ogezyf0YJu  
DFA+afJtchBGn79G60qaxoByx2n3p0R9YIS916yyjgGyv3J0vwoEuu+RGKJx  
ioERWbdchk4BhA4SIX09YsDCbLeRNJkftZwflnvrHwMrmMe15gt8SLrjtPTJ  
8BhoYA6sovbCoQe49BOZcTHw8NNY/kgxLxKOnxZbTYmBrz mhKxRHedF/40rC  
phkxYOv8Tz74NQ9iU83hq8uJAZwRRrrzlgdl3lniYimIgasXr6848PEiyj0N  
ttCSGFC9LXeUJIsXJdndYfpcSbxfS30tHB00/WndoJV7TLsnki+VE/VICjch  
5a3mGMAX0f/4S80HlqPuHdnuiGbFR2T32L5kNvw33/WPcR6qVEu0w7zoQkF  
yz8t/THASjqkxE3Uc1Z5Nb+5BmMgu/cEabIykd+3yH/FjMfA6NR95hlzfqRr  
dX55bDYG/oslwE5d4EcvGpvmVZdjIOQk5ct2Z36kzMY4U7geAzv3fve0WPGj  
+jDPif0/MdAX33Z5TJ0fnfhMGHYiiYVkm/HTrFz8qFyW8/NzqlgQWV0cXp7j  
Q3y5Qe8FmWLhX6SqRnEVH8pb732dzBELbS70L5/48yEmc8GeWT7ifpOJ+VRZ  
PpReF/1C61gsxE2eQHH/cOgl86en5Sdj4W1tn010Pw7FBkm0UMjFwh1Xoy4H  
or7+/T653lM1FhgK+BnoruKQ/6mxR72asSDeNWOhSOSP+UzZB+IGsaDun+vB  
FoZDTisZ5VfMYyG4hrxqmKj/h43mipdtY0F5sz9L1J/INzWq/xk6xwJrY1JW  
EdH+mu5mXo1XLIQ6PuFdCiHysd/PHIagWBg8v11dSeSDp2/OZgZGxsJj8bm6  
BCIfyEneTf+QEAu6f86iRmI+j65sXZS+FAtp4S2krEQ+FFsyTsq5Fgu3X2RZ  
rRP5sFivInbjRizYdEjEPiHyIVfVQcS5/2KhwbB7wxMir+VQ2YQ0lsWCu5GY  
jjmR52i9HvuzV8dCSIl2+C8iL+KHvMnY62PhD/en1MoGHnrWEr7D1h4L7Fcr  
CkyJ+/3rx6XZOmPhNb+QrAiR92YFb/UefRMLYnuviqSI/G573cTp6EAsYJr8  
OrF3cej9PtUW61gsSOAeKbAR820fixVmXY6FZ9wZ8+cvEflLX66NZSMWrqV9

OyVKrG9Fy4opy14sxPJeP+1B5CecWOUCM2kc/PrIOXDeG4dybzonMNPgwey3  
+LJuJyIfkvGwMbPGEeP30o5aEfk75HM1E08cGOWpPPII5P/Nr9c0mITjYDiU  
V21GB4d8TXRGGCXj4NynR+ZA5P3pZ4eBjLjxYPBJPI9EncjnJ9ooGFXiQDd3  
p+mFCg71F4QWmmjGwecziubGxLUm9ckzDAZx8FCH/MeuKg61Rs6/prcg5nf8  
4egvROT1+SJnevs4WGSiS83VJPLaOdsdOldivNjB7z3E83k6WbLof00AMNtC  
GmilQ9nSb0XpQuNgv9tjINCMyO/FqU9pY+OguTDLsoZ4n424nUWajDiw4z3q  
FeCMQ97LdUk0uXFQ0fZho9UDh6ZsfTlo7sQBmZgoxyCRRy17RR5Rl8VBy/65  
otogHHojP6lFXR0H4aF+JtJEPobyvDGq+jj4N3eXGoj91sxqFkLVHgdH6/kf  
d8cR+TuZhpqqMw5i1YRE7yfiUNmvziLKN3Hwe3ZEvw9P7CeneHnKgTjQoIgh  
ZSe+37P65fspxuJAjExeOpS4Jlf95UoxGwcuagGIPcT+jX1QtUu+HAcvys8P  
5iQR+ZPTNZt8Iw6Keg6UI4jneV7mPU6+Fwfdga6cxhE4NLE52EFGGg97QXee  
bBPnx8lty5KMNp44j63Gpq5EHv6k+4OUNR66295LyxHrg+BICilPPCyXrhan  
aONQY207F6lwPOgJSU5znsEhSb7wx0ck46GK6obCJz7i9+iqlM4R2XgYFFVd  
vEqBQxx7CxMkKvGQpyencmyZF13zLgkj0YyHFs3skNi3vIh02I6WxCaejsw5  
f/Z+wIuitY+WHprHA9ptKX93kRetNvQrHtrFg5JVpeRle17kLnz5/YELcf8r  
qA6S4kVj2ZjHgU88pPHleXv940Fmh3/+7ofEQ7BEW7VBLw96FVCfux8TD2rt  
T5u2M3mQ2oSfxH5yPDQXP36vZ8aD6g2OvfH3JR4qH1So8DPyIPG2Ket/OfEw  
VlIPfNbcqOh4/srfgnhg950X6IvjRlfj6Xj/PoiHvhjKrKkhLsTIWwhDT+KB  
EJ5xZC2eC2XLShk+bouHO/eNpBf4udBNJ9Mnbq/jQb7d1HTfgqi3Iqa/qH+K  
h5KK0LSJbxwo/2rIP85R4v3GbtPyhXCgwtYbuv2L8aAj/igZRbMj/g+iARVr  
8eBhmNQxucGGSuabcvF/4oGyl3PQ3osN3WcdmZSjTgC60QtCfupHUa0/Lvzu  
8QTomqmsNlRdJkQvPiqI0p0Arqls1qkvmFB9AXpurpgAmarhhvyIEbW8cqal  
1E2A7NYLVnZkdEhlcv30tEkCMFsfPezWokHPfqdYtVsngFISy8M2Pyr0QvB+



SaBnAnC9oBkuDCBDmooKr/QCif4HOR0q2kdQt3HvD+HIBHhxnPQ7/nBf/XXs  
ksLwpQSQFnOW75bZVDfKiXV8kpkAglf/vG4aXFF/X0mXcvUWce2o/t8+YVZ9  
YFDqHXY/AUhC06dKTL07LH8QNrgfjYDzu0yNkdGZji9HzLg2G4n+T/+Whyr/  
6hg/FepW1Z0Aa1nbpU0/9juctMmupPQnQPqB8W5nLylh2uFmreMg0b7zbbmi  
m5LwLb15l/lbArR6djmSnWUieBbrCvz4kQA/7ZGq5zcWwmLTyNme3wlQt39K  
pwCxEVZm967HkCXCICMh6KkaN2FbDR0bFU4EA4kRIVYIYUL0uY+GzyQTgfb  
eUz+CxHCno9LSJ5sluAiVx5Y2xwjHOZdfGagmQgJDA+ny+rECdTrvRYNLonA  
p/H7ggGDNCGDyi460ycR6JXN9mIYZQj0/Mt3vUIS4RpN+bsVTlkCiyH9Em9y  
IoxWX9NWOCtHuOlyl3E7PRGmm033Lb3kCRzRp+Q+ZifCKxZPNqMbCoT8rOd2  
1fmJsLSQVjH/UpHAc98sKbUkEVpsbz3qmVQiSNeFSw1XJsJl4iyz+1tlgs7T  
/HGJx4mgeT1KoeGWCsHx1bMr8c2JQMLEOd13RpUQ+mLa8UNHInBfvPihvVCV  
kD5BviDUkwh5wUmvinpVCUXfxW+G9ydCsu07yxkPVQmNG0aavZ8TYebt6YEB  
mCrhZx7wGvd4IrzQ8vH9GKtCmKa+VeQ/mwjH9dVYrC2VCdtH24yeLyVCU24Y  
T3SXIoFeYHKPZT0R3nZfyEudkSciSx554P4nEf4SInDP354hKMkfs2k5TIRt  
zq8y/JkyBBPQp6ClSoKx/owWaZdThFjrHjfH7ElwPMGJLPiGKCHbpYmJlC8J  
Mr5wCkpaCRAq/Ec7LEWToOv34aTeU3bCs6h9v8oTSRBsp1h9kpaGMJAixLMn  
mwTOMxkf3X+vdixmavcZqSRB+LXZxe8za+oH+T6RxRpJwJHU9cRUmhKxlWeK  
buglQXGU4teSFBYk+fjJwFkzov1Rr9dna04E7UP42zZJEJKYEuBMfF9b9+ye  
WnYi2ilqIsKjBJH/R75JNc8k8FLerVLqCKOUcY2r1wOSwHf+Cl9rmQjKX/BQ  
ng1Pggv8AckjF0VR7fqV73LxSZC2rn679aso6v736FbaxSQDgyfqKoRReNU  
A1pjGUmgfy/9/e60CNpg3V4/mZsECiUby39DhRE1P09JukESWilaL6m4Cyl+  
CWQyUJIEZi003rIzvEhOzvWfaFUSWFjU4EeCOJABdrk66nESIASvq8BKZuRs  
UG37pjKJZL8+hM0ICnTNeaMxqCcJpt3vHQkm9HaU+XG4dfYnAUFp5mtyzk5H

a6QKC/sg0f+op2hCDznhfbLTc6/xJKhnWZNkoqcnfLuWEtA+mwRunAO68v8x  
E/ZuV/AyLCfB439RQRq/WAjM9968vrCeBI13Yu42sbASxGpXo+r/JIHRs3tk  
uikshCJHmhukJHjw3PyF3I2YCRKuvMsPyfDwbSj/1fpPekKjl5SGFRUeXlw3  
oZlhoCZgAVj+AS0ekOdkQAA1KeFNqPmvSkY8RFtoKU0MbHVYRbvpmLPiYe1s  
x9dPK0Md0wkRd/fy8UB9muWEY8uSut/FtM173HjivMtnB14jQdvpBYbGfHgw  
+Ig/KZ9Dh5KzHpZtC+LhEld84YOWo4j+ZsdusSgeXBMVe7efcaPbBR/M9MXx  
cGFT8pS/pwASLp6p3DiBh8t1j611NITRo/LfB/+dxkPiUGD2SpAoUqqmsNY+  
Q/R3tJENIPJZ12POR6sKeIhoDaimNDqOTJokyPNV8EB5vtznb+9xZKv5syob  
4UGHr6j9Y8Jx5PKh1viKJh4EVbfnI9+JIV/Hkl1kHTwkvfJVXVs8hsKXztyO  
NcCDTGR5e8SMKEqM3FYNM8FD+nMPd+gTQWlkbdN+FnhY1GpSullrjLKz4y65  
W+NBoKBP8cp9IXSHD0met8dDRXA9iHQlovJqkg9WTnigD6aqfjIkgB4pdoWZ  
uOLB7GB49LM9P2ruvsSl64mHmcSlxx5cfOiFuV4H5ouHrm8mbwWI+uHNFk2r  
UiAeckV437ZH8aLPfu8oZULxcOuUi8kvBV408ef6Q4lIPAj3+av880JFC5cs  
zIRj8fBfWX39qS+8aI2VfYsnEQ9ZFu8Zr9vh0G7xcMHRFDz0KJaiwgUclpW6  
g+gv4+FcPb3sQggfom93nCPPwIOx8MbIv198iENXIHO/Ew9x32VFgon8JDA4  
c3I7Bw/XX2VI/M7jR+Iu5Z9Wb+HButSvJ/c5P5Jd9Yz8XkDsl6GPgszj/Egt  
ToJ3+i4eYgb1Mye/8yNt6p/PR0rxwMfg+tf/Gz8yuVXr/uk+HmjWyh2kP/Aj  
W+EQmjcP8GC3creoIlfuT4+U9v5CA/KESONPD78yE9t2+LpEzzobWxCCT8/  
SrSOK6xpW0Pm4/IHCeE/ppT17jfgQeuMwYBpVp8KCeYZOHuS2I/VYgEBVPx  
oTv7nRl5PXg4eUImz2yYqJczLp2+/hoP3rOhryubcaiWU28w7R0e5vovbJdD  
w6GWctoY/CfifaJOBG/fxKEXMu/4YobwwHzz82UmIt++IVzvDBkl9g9PG816  
Gg4Nglp4+U4S+5VcvV8tHYcmR9jo3Wal/Wf4ovTm//9v8xiuc5jHA8fivfN3  
iPHWNgqsLJelzyvR8pI6kaf2khz3jFaI8/Tlr5kHkXfIGASKtdfxIBGQ+p6L

yEv0d2a00BYe/G0SRrwJRD15vHxRYRcPp6oi9D17cEiw0TPz9D4e3oT++yv0  
GockNCRkxY8kQ8mbkjc1fTgk+/7HF0GKZPgpkayat1Y1Dag61cdw0yYC74Vn4  
khHPZzFYkUjUgW7apLv4teKQacSZHlqWZChTv+lr+YTIW6TbPmTsyXCdTLyS  
+wEOuV5vZfzHIQyVXjS/z5QSeQ0X17CJSwYF8U5di3wcinigbrsimAzXyMiv  
HmYReUmBZH9eNBnWWyIrTYk8lt7VWTolngx37XLvlhL1ea7ZJZ3hk8ngIxrh  
mEDkscJJ3R8fpIn5S7Xs8xB5o8KXNrtPLhmcamLs64n6/PF0v9xLpWToGZ40  
jHMk9vPhCF+kWjL0bR+o/rYhfl8o5ylPQDJY11tEflbEoQcM67++aiUDtnDJ  
Rf8cDv1j2x+5qZsMFp3avinEtRmOplPMBkKhL8P8RD1/j0R9ocHJskgkhjm  
qUOMty0pdLPBIhkaXvqdWybOk4GsVIK3dTI8kJDWWyGeX6Ss7MlnnwyuG4Jr  
8kR+Wgdt04HzyaBmW7Rd7YZD+abnhdQ8kuH9z+f9jcT7/LT2oV33TgaNm6K/  
OQJxCHOK+H3fPxnucXU6aRN5Pdcjecl+OBIUEpIUdYk8teCf2cMUngxaH5YS  
mKJwSCW8oLY7KhnsGTz+XIvBocy4+7dj4pKBg5CiWkus53TKE/ypJOIaly3m  
mkDk+4wOn7mUZNhcovK6TeStsfwhVeOMZGiy2fwARF5KrlxhaMIJhqTzu1P  
RD4erN3d9ruVDPnetHTviPHFmymmmBQuSQZynhx1P5Ke4DpbXQ4XJ0L3CdGWR  
yH/vu/nqM0qS4W0A9TCZDw4J90v8h5Unwx3R/pAPxHpEfjZP3awkxiuMfqtH  
rGffmEbAg4fJIOh8wjrAiMjfs8bWTo+TIXf3SKoK4FDwkh12tCEZzH5z9z6S  
xaGuNQ/xvuZkIAxn53SLEPv/TwhLQnsyKMukWsUfjfl2YcKeDCEZ+DJYLg0c  
wSECZcbcwktivf2tc7tX/0eRlcdD/T9hue/7yF6s+0pylMQYcuUoSqhJqSi  
AymS2F12sXZXukiXljolSfjVKUeKVJKQSiqVohwJ/T6/P+f1np3zmfk881oy  
KMkfaSt8SPRv084fq3rIUEO5Uiz25BBm3Dq+0egyGWT1ajNrOw6huffg8M7D  
ZNhg+mhn3ItDyOvet919PxnE7fqdX785hH2as6ePOZFhndOwKfct8d6gXyan  
S4ZLHhOqyz8cwoSnCjwJETKsCZT/dGn4EHqtKG49WE+CC2Gkjo0jh1D88YF5  
f46TYDrK4Lb62CGM6Tv87tseEpyOh+y0P4dwo09tlJ0uCX4ne8bbzBLzMbBy

hDulCe4ZAeuHhdLxxMltn9e0acIIP3ahv2Q6XojTm9aL0wTn4/vnS8mmY8Lx  
v+OmoAkFp1nz6hXSUaJ0wvS4jCbYXy1+bqiRjv8deSpfdGY+cNqe7v2rn45G  
ZcljH29rQGhI9pV/xuk40IzCKYkaYD7s/lHEPB0Ls9gLbBdpQKfEPT/Zxen4  
rU+xs/iMOpCW31hAdUvHJ+bfLNm71ODi7aMfYHM62m3Yu2b0szLs9/AnLY9J  
x4gwsmdnEWXwfw42j02HV16x16LuSjDz9/s+lWJ6bhlfVnayCklsLVIOR7O  
Ssf+G3RpSpgiSP9n2xHJSSf25drdVxUUoddnXHwrNx1lg01vnmEoQNq22Phd  
R4j8Bt199gTIQ/OF8FXpF9LRd+VbTXmaLJywobJY5el40fLee8xGdje+LqO  
cyUd3RNrjW9pyIDiez+T/GpC310+mq0jDe93Kmw8WpuOrU8sjhlclYKqf4+P  
Ftan48nhPrulTIIQSHUVK3mUjjdZLwMH9kqC0aV59mWt6aj9jEZlUiVh2q5+  
96Wn6ajj9d02oVUC2lr2X7zWSeQf3NKhmSYBxUFLBqq60jE50liaBBKw89Mv  
9ds96SjUnie9QkwCnBOv+dztT0fGv+RJ8y6CT4vtYNx7n47FITsm1lwXh6F8  
4zsPh9Lxo8cHMzwqDjU6Q6Mtw0Q/zNY3JGeJA+f6WaOnI+m4YkdwF5cpDqG4  
YUPnWDoK4oIPz8sTB/N28pGuiXQMpt6rFXpeHITCutt6ptPR1je82KBFHDq/  
HRZ505e09/9E2nyZFoeS5NV2H4QzMOfvVmmzZRKQKC2/65N4BprcGXHey5EA  
j+OtpV+lM9CmeLfomi8SQDLK7P8hn4EgnRDvHiQJ36qXq/1WzsD+yISa3leS  
UO8q5D2lnoGlKr/GT0RLAe9FXfoMKQMtUnb4SctIQ8SmfbeFtDJQXjTyV+V/  
0mA9ZvNTVDcDuxQD5iiZMiB2aMxAyjADByUeHOvYKAv9H0jnp00yUPq71Fy7  
lxxUuy3X/WaegTf2LuuLWSEP3IvbzvRZZuDtZpa8TogCbJY9rNW+OAM3pMnZ  
3EFFgLi6kw12GbjotEpkl8iqHcOkishA/X8dwjNspTg0VGB+QVuGXjp9r5F  
qX+UoXh6/RGWZwYq/jc3btKoAonrWapJKzOw7OD1L98KVWFlwxXBVr8MnEl8  
cWzPITUw0H2lGBKQgfb9MrprEtRhjvmP6x2cgYdH/pZqJWIA12dDOQgj/L3z  
cN/BmQ+sK0IS9M0ZWLWas6b3LQnClM5kKsdkoJBz0z99PQosjm8RE43NQOs/  
oy50+6kwtJQk/CkhA1M7fHNoC7Whvsg5rXtfBv48tOQXQbzhyL+YuZYDRL/Y

fVG2zXRwe3hn+hIzAz1krl2u5+gCzWgwqZidgf7/pZ1dnqIHExzZybcDExb  
tu79vH36cMF3/a/dBRm4b25rul+BIYj3zn21PU/ot4v9W7/RDPPrBMMbkYgZy  
BhUkmqoWQPWZVZ/JlzOQeaGy+7baQti85fTgXBWBn9ViOZVCiwBamyN+1mRg  
rExlZ9CjRaC+YHTgXV0GvvFvpwblW8KjMae+xsYMZLT/Gxhfbg3Fa2NCqpsJ  
f9SP0f2GNpBYI3hd2paBr63eqlapLAaD1A8vOS8I/Py+OVUrYgtzAzL+Kd0Z  
eLQ2EhdLLOwu5dad03ozMOyM8vI/qnbAkml+9R0k/LEeJcyo2kPY9svezp+J  
fnW3Dc39s4fF7S9brb4R9g+6IK3PAeQt5zz0fxL+vS41xl0CGDps0KT++//1  
y6iWjHWE+smVrpJTGdjapGv2TxHhSPDeB3/+ZqCsv/2EzSRC7N1TTI//ZWCg  
oDW4/BqCm3bzf70iDCwalvsbN4FAy/jp8FSCgS2NrklcGyeY+Di/7j8ZBj7N  
ur5HMdYJnno42V1XYODxYh5X6LQTXKjYWnNWhYGkWJ2YrY+dIFVesPiwBgNx  
w4XStT+dIGBXbRWTzMCp1yGf2+WdwfzFe8u9Wgy0dk/8t7AGSSWyFyP1mXg  
R5l1U8dsncFI9cAedUMGOo85tW9b7gyeoyM2jSYMrPWolmzycIbtT8Ondpkz  
MPU13e0GIXMrOmu1LBnYEPvTaCmhfy3L5cATGwZWdeb6bSTsdUZVOyYvZSCn  
PSrS2sgZfjsbCRs7MDBp4eC/WmVnUNC+0diFDLxaF/9odtIjbGdlMhkuDNzk  
ILFOrNsJgnsOrLD0YOCjzOTgnkonSLn1Q2bAi4HSwS0xzCwnKD688WnuKgZG  
pXebKqxzgoZdz3nL1jBQ4rGqY5qeE7xf6brmSwAD9ea+uL4bRjCQMu52CWPg  
CW/5qoJoBI+hEyfGNjIwaMY6bFoLleaB7PrTUUS+qe4iH0oc4cqBn+/+bmeg  
IK9S/J7VAB3BESUXdxL1bryka3vcAcaWvNgcGM/AVdcWP9v8isDL2K2vlcnE  
753jF7kvWQZB7cZXwg8y8I7Sq63kdXaw/1LhTvkMBu4tZ1UU71oK9ZsPjm/l  
EPXimARMspaA6xu3f9rHGXi4LemfV4oVbK6pufe0iIHKbZJxGXmWkFVgwkg5  
zUDxf2/mxK8sgrZV8lLdpQz0adr2ekDGakbM0h4zKxh4IG3n2dACc1CUHsu1  
uspAl+h21nbDBeDf+FI5r5qBI6W0900sE0g84/7SvpaBck3mN+atMYZjqbeP  
Dt9IYEaMy4LcRUZQG2IafOweoZ8Qd+Ad3RB6bU9S3B4y8FvbfX0JugYwp6bw

9lczAzXXuPrfs9EH7V9pZ860MVDpm4LNsIA9iLwcaTD7nIG9gzfuH3msAyxO  
1+fyVwwckrncspmsA2VbPCqC3jDQ8oXJe6d9dGh1qd0h/paBoXSHpacGteEb  
3cyi6j0D/3X9+jseqg3y/06ObRxiYML1u1f2P9ACi16FmwrDDAxQpYx2E/ej  
3+1De+9+Z2DPSR3NcQoN4o/8WrptIHL1EbT7sZQ4cieqJn54wy86VSarv2E  
AjW+r+ofTTEwbTgySXY5wX8XrDgUP8PA7q4VdXGPyTAjfWe5jhATJ54kINIG  
kYH22Uy8Q4SJakclj65VIAM+LG4+IMHE2D/091XNJlg4q5htKsNE+7p3H1x4  
JMg4m07zWp6JjRe2TPyKJIHeYMn6LmUmwvyei4LlJGj0aNrxXJ2JLwMeZf4z  
JxH1+nKgg8TEvZXTbX36JBBVluU+oTGRnOxa3WFAgpJE8+JWHSbeFkpIS7Yg  
EXjxvdJkwMSV+YHRh5xIMOS4p77RhInt6XfKmUEkYJUUP1nzkQTrTiGaTyJ  
wH9Nf70IE9fXoKV6PgmadvSM3FnMxOjiuZ+fb5AgunNmrsaOiUvpe2fdXpJA  
comWQjUwsYGXdpj50AnKCp20bjgzccb+2dgiVTKsEIpceM2NidsVRTZpmJNh  
OJLleNmTibWvVzevtiEDp6VsVflKJhbV31mUZEAGE/PHG0r9mLjK0HzJS2Ey  
PBZ8jysJKY4ypGdNx6TYPukQtqZYCb+0XufsD6dBLKhlrziMCYyOHP9VCMS  
XGrwP10YwcQXqq+XO9Zrgo/+3mvHNjPxn+kGe1k3gv+yjzcUxBD52aaGtzfM  
B+7InQ5BLBN9z+p6PF84H8zX9A/k7Sb6+cw+O+KwBrTfEhrNSWRi6MJb95p+  
qIPiIVelzFQiHjVmNPDUGK/SvjqZy8Tu0ZRlYkXKYJk0ujFJwETbySO3tr9R  
gs5eld0JR5iYv/3A0BxZCZQvBAAniplomdeaVOilAJXSyWe3n2Viwt90A8cP  
crAm7mTl1gtMfjXl+CcnUxYO277v3HSFiRaeFk+ShQh+c1L0Q3glE1W1S0bu  
PZLwcp7hr/XVRDyBe/YoPSb41uYVliG1RH/vqz+Jeyk06o+3qQTVM3G+1duY  
yb9iUL2Qq7v2PiEnlaY4OIlB40FrVn6PmKgf4Wn5qlQUpqY6l69qZeLwvbn3  
1lmKwrH142u8nzLx55Zsj+APImB7XyNyRScTc/TeSsbeFYHXBnbxbl1MXNac  
ZGbyQAT2Z4cylvcwkaVr9UF3UGRIP1MPYz8Tm8S/hP4MEYVa/zMIDu+ZmOyc  
OKL3WxRCbj+oshti4trSyqCA+2IwQx1qXDLMxCTiKXYkgl8WpUu+tB5h4oUF

l4rFZCTB/pPJx0VjRDw/qDcvc6Sgz8tn3HyCiSnUS5dLPWUg9VqcmNk0E2NY  
i2qyf0SApiZQM55jYqvEqtUx0QpQv69K30CYhb6P0ha6VytCWH+Xja44C289  
+njl4rISnColB1DIWWhe4bwpar8KcFiZ5V1KLDwRWvLRcrkqxEf9mstTY+Fv  
r9VSIijq4KH7uFSYykL2g8s5YdHqYcm8ZOaONgunanccWy6vAdR3Z30T9Fio  
0378ZH+FBowV7//zyZSFkaaB3748nQ+9B4Z8zixkYfX7qXc3/DXhUajf2WAR  
FooXGBp/6tSEa8vqj1SWsPD7vq9Hr60gQSHjxOuJHQv1WrxFHW4T8/un4BQL  
CLl2jcttOhl2ds/77ejMwp0MSXO/DDK4HHldVLmChZczigJyiXvYPMF1dJsP  
C58b5jix0yig6X/dVX81C99meJqvbaaAqBX1RL8/CwPb345RpakwosQeORRe  
wkdO/lGKblTo/vnbeXUoC7uVr4WsS6HC/fbwo9LhLDTZ/7dC/zIVLl1p+/pg  
EwsDroLZ2W4qHM21xQNbWDhv+FDl3zkqpG8vObx4GwtrNj5R3aBNg+1eil9+  
xLJQcaWx8R97GgSYpDhc3E3E03Ty4YQ/DVDqMz8ikYWmm6waGNE0MPm8Zoi8  
n4W6f0dH2vfSQK3pP7uXB1hoPfTOUCyDBkIXTP04h1j4K0TGaTWHBsOMox/c  
mSz8m5+o+C6XBi82idjOY7Nw+KHp9v/L/znH5dTmsDDI2MrkIKFfTn8zsIfH  
wnfjh7U/EfYOC7nbLDhM9G/TOn23/TRIfVvJHjrKwptlWfltO2gQXU/rP1VI  
+J8zqSwKI74vJzmW606xcFmhx9B3bxo4pEywlM+xMOzWI7QvtjQwCol48/gC  
Cx046kF1OjRQtnu6kFnOwn1er5zypWkwM9+OAVdYeNHSWrXwJ8HXJ893T14n  
8nl0/5YfUc+OLqUF12+ykLvr/D12MxXu3DxwKOY2C9t+nG6XukeFC4e/vNS9  
S+Cr5cr3CELm7Vlr0tfAwillms6F+CxX2+91LPdLIQrfLn9gDr6gQuWjB81XN  
RD0eiWnrf6fCSsXjhlJtLCwKpkykS9Jg6Q/RIpvtLFT6qTefY0wDvac705Kf  
s3BUXIPQuooG8pd79WxesbAPxujeEPWZyvbYN9JDxCdRfndJOQ3ex1Q9Ke1n  
YeXPpZmMPHq0rdDW2fieHROHCrs9VbXgllFOImmIhZrLm++SVmpBztAmrdzv  
LEzcs3WPRosW2ESo7No9w8IP1znfdaK1wUDtq6ymUCa6FQbEf8zSBvXm+2X/  
iWTis1bRVTsvasPEgt0DsJKZGDo2KS77RRuGBlak3JDPRJ+PVVtuSNDhVT59

frByJgapuuj66tOh5k/HqLLNTEyItFw/EkqHsktIX32omcj5uVjyVQIdjm9I  
y/ytnYl5E5sblubSgaMcpFuol4lzpmoUzlk67H+48D8no0z04s6G5t+kQ0yS  
RMhn00z8Rept1H5EhxDTtxPchZkY3769YPY5Hbz7qwU2VpnoeHGb4ng/Hez5  
XPPexZn4+PzhvZ1DdDBz2dyabpeJh++fk934lQ7USYfnxpCJyrP+Stu/0UG+  
XE24wykT7/hFNtV/ocNc6PeTia6ZKH0vd6feBzqMKDxcSl2RiYmuuSuju+nw  
9n7RywfehP8+2rm1LXToSijfFeObiQdYc1dvEfE2GHnLKflnohJ8r153kg7X  
3uhevBWYiSXzjv0RT6PDGe5fl7CQTDz3tOU2Zz0dBE7PB0Q3ZCL37NKl12zo  
kP67PKUilhOH95+77Sxjh92l6fP9Nmfi6acJK4VfacOm4OCqqa2E/ewdBwpL  
tcGlQeqb665MzjGZtfFepQ3We95lfovPxPeaV3Q8DbRB3+C2bn5SJmaQNeRP  
z2mBeE50yMdBTHyQMPMnLVYLjgAnWRmZ2JOy7o0OmRZ8GtXIX5CziXZJ8R6x  
32nQHNjUup+biSsSVigXEniskT61mS4g+iez2GGFGw0u3k0Ubi7IRL//XHfa  
qdHgxM6VxbHHM/F7D19+7ScqcHQN7NROZuKtMqvkg3XEvHTNvrzxOhN/7HbR  
PH2YCjHsl7siSjLxQ0af18k4Knj9Yfy8WpGJOufk/j5aQAX7s6GuAVczUdLt  
IUODIhXM1lq/m6kk8gvinlk4QQGKpOyBc9WZ+Fvfm/23jwKydZ7M96wl8DZp  
HCRN7N+ZHxeqft7NxJ8aTrucqyjwXTvf9+i9TIx7Vr6Ec5YC/c9jvjk8zMTA  
2DT5ZgEFnrKcswabM/GP7Zug9wwK1C8l6WW3ZWJR8ot9/yVR40q30f8WdRD2  
05gvXGMpcPpUS0j3cwJPAom2kCgK8PzOTKa+Iuo9vefBp/UUSBPbl6//JhMN  
RQepHYEU2FXju7CtPxPd/+yEv34UiNhm9Hj3+0y00rPOWrWKAn40oS2aQ5m4  
pN0t7IY3BSzyFe3ERjLR2yfxn7UnBeQl6XKj45moKu3TvNiLAgecL04M/cnE  
waFD0zcj/W8piwZ6ZzNxYGUt+cZKCoTcut3SOS8LF5n6J8mtpkDrqNONZrEs  
nBd10bRkDQWWmrUW1Utl4f6PumqBARQo2+zHqpLLwqYCtRHRdRTQONMTV66  
U  
hcobBqxyQyjAehOx7rRaFjJN3lu2E/mNq311PqKZhW35b9MFGygQ6bvHLlea



hReKjVivwijQyfmrlk7PwpTvPgdnngyng9DDj3179LBT+q59m5U+Ba/9kvuww  
zsfTpknyoj8aHaHOzctyEJZB4+BbKBAbjylbt2iLJzd7LhJ1oLo55WS86ts  
spBht9xmnRYFtn0xy3NdmowBlibRZ2SJe0L3ZtIyhyy0bGmVU50iQ82xh16G  
rln4pl4wZd1KBSpnPjbUFVliUdmy0ek6GY7IddFUfLLQfXQlw/ooGeLTh0bn  
/LNw6elbjtnhZLDYLnGsKzILm1cuT9MeIcGpC3mH2qKJ/MOML2c914H8041t  
97dn4c8nXTq+N0nwba0RXInPwurqdwtp5IghHfNsCQpCw/pfxuuIe6R1lZb  
pRMpWdjfr7H4hRfB7x1XDDIZWbiQsqBRk0YcJf3PniRnZeHhggcmZ6UIPIK1  
7taunCyMdXkZLTypCeMj705v4WVh/Dlb3tYhTYg0juGsP5yF4QsaK8W7NeH5  
prE9a45l4XDoyveSbZrgXLx//YqiLHx86bLFqfuacL1b2N3xdBbWHa25OnVH  
E7RVsi1sSrIw4ZjrLpcaTczUSGZlmXhNWPTzOu3NGEus1CEfikL9R45isTV  
asKO+7rf1a9lYfbndZMVDZrQO1PRJvUvHUUyvglHWzXBa4l1g3ANgZfyKW44  
EU/trrqLU3eysARMAhYPa4LxJZf8kf+I/rrc6XUXIsGxobaUwQcEHm3SrRtj  
JJCgr93c05SFkLM2rmcpCRJD+lZ1PM7CfY0yp26vJ4F/x3eduucEnm00+U2W  
k+CBdKjs5assHK3/dSDnKQksXefGS99k4YJ7enPzfpJAoVa+Jf9DFr4bXpLS  
YUaG5tiBCddPWWj4jt+f4UaGNN1KvanhLEwzCbX7JIwMS7sz/MpHslBlqXmh  
eglZxnLWpoWoeFhMvTutyCFDhZPhFfmJLLSPRQjLP0mGyImpNw1/slB8X/GK  
iqtK6NpQtER/HhszLy7471k7GfjUY6NeibJxzw31VX/7yODR4pjPlmSj55ni  
nT+HySCUqnRvmSwbdT5uu1A/QYbblh9GviuwkTyqt2fPPArs/lRFOa3CxpVL  
dq6jyFDAPjl6afBxmfGv988UqHAB9+gJFEyGx/YBR5II10gSMzkQjWNjQ69  
jg0BOhRYW/v3ebQOGwPT/A0DjYj9EfdkHtmAjQuOL7PJW0CBjt1TC58Ys/H1  
scLtsGsfTeveuf7gAjbGj5J8e22I/ZDrnL1oERvnq4VHyC6lwJiT6u0P1mx8  
l6BkUL6MAuUTH4cKbNn4ifmS+sCBAPsqbql62LPR9ZZfW6QjsZ/D2c7TjmxU  
T1IYVYQUeKEasvPScsK+m3JQkhMx3y1mxWHubNybdCZOzJkCbqlzjxW92Ghf

ldHvS8g1n84YJvixMY7fEx9MyCarXTNer2Njf6ynxTxCLqr930+wkY3BfeIG  
1wl78no5dmej2Vi1Y/m2LkJu6l4f7b+djV1vV3cuJvTTchceEd/JxvprVmp9  
hGzrPK+xZg8bmX551V3LKTA60Tkas5eNbktkli5yJfKrKNGiJrOR8sxHa9qN  
2NfhiT7tqWzUFsx+hRUUIKt5JB9KZ+Om/OZOOWL/vmjRvGjFYuPI8UjKfWKf  
56Z+7frIZuPjqDtfS4l952Z1V/RYLH/mqVXwoh9+O8T19KTz8YVft7PFmww  
8i0KD585zMY14xvuf4smvherLblXjrHxQMS7Ee4uIn9x0brwIjbOBDS0SiQT  
+ceVajw8x8aHY0u0vHhEv/X2ue4tZWOS6rWDM4VEPV577jGuYKPPo5vgV0aB  
g84jT3Mr2Wj+lsKtuU/kP/nfjGM1G881B/652kGBnxV8k7HbbJRwf56k+Zbl  
V82GFXCPjckSjGKs///fzrZQauDjadqnsqb21MhVW+uRvsFke9vRdZ1Hyrc  
DE+z1ukm8PTqXOHYDVTQe80w1R9gY+zLDYVr0qkQoiZRajDixrnLwenX86kg  
WM3WMfpM+NvlOa+/hArzWnM1TX+yMTT4UkPEIyrYiisWmP1mI4/7c/ZEFxV2  
OgsUzafYqHHmSdvGISr01x6RWCTEwcGUifkhojRQn5yfYSnKQaq/av4OZRr4  
WBXOWUlycJ9+3LGnWjSoqzg1vliRg4c6D4I9cT/8/kTfZavKwfl1Er1Gy2lg  
qlfybel8Dlbc2Tmn60Mj+m0QvYzCQatu3RJqAMFviso+2Gtz8MJ8zmMx4j55  
1m2yAfQ40JUhu6ctkgaSapd7HI04qE1XPb4xhri3Vi8McDLjoNqklP3NWBrs  
zb3+zNmCg62ygcG3dtHgSouVj4s1B5dsjRwL3EODIbHqZldbDq5WKRT0JGSq  
s62Luz0HFZQj2da7aeCfWvufB3Jw83Yjpm8cDXJq7Zd5unDQy3j171bC340J  
+movDw5Wr3J/mU/EM23pZOnjzcGioT0GhaE0slx7cHmlLwdHfzsOdfjRIKbC  
1djXn8j3kKqKvjsNznxqKlkdxMHG/OCKzKU06Nb11F4TykELy+TLn4l7RTG8  
rdA/nINvN73VsJ1PA/eilRoBkRx8tvDn5yii/qndHYLAaA50FqlrRYxQoVp1  
jfy67Rx0qrxTQyH69933Jt4JwevJXpUMe8Q+MgNFAuN56DNqL5ibjEVQlte  
p61P4qBZVJ27/kEq5IuFzoSlcPCA60zbHJQPrU79e8PTObj2mBVu6kwF4dTw  
XxsZRHwPy8LDDKiwtPZ97KYsDsbMu2rqKEuFMstPUZt5HCzcX1h4o5cCb203

vttymIPR/uRZchMF1Cu+hm49xsHF5ZVn31RSYOWnHd0xRcTvPa8M956iAFP3  
55rtpzkYLxJiJc2lQN2G3e07Soj6nhN7430AAr8Lf3vGlXHw6J9pR8EOY15U  
/zjtvsbBoX9TtY98KXDCN/nunio00nwKc70J/flsZ9Y2oYboB/vOkenFFEAx  
YYukBg50S118mEbwGeqENC21g4N37xQPtf8mQ7D4n4HtLziYUvD7Tg3xvTim  
/ulcSDcHv2h+tzk1QAbIJQ+Mlw4Q/bxEslVpI40v+/VvhoMczBfa37H3Hhly  
A09dVf/MQSF2x4KsajIJIxib/P7BQc/7twKDT5HBLWvr1PtfHLSs2W39S0CG  
jGOBd55NEvo79k18ZJKhocw1teEvB61F3unTksgwV2PldPUfB/101ntmbiWD  
fQtdtFgkGz+sN/wuG0yGfa8VmnIksnH3FouCEyvI8PvPV+8YhWwUvN2rnqJP  
BkvpHoV1Ktлонj/w74ISGeJlzZ3uGtn4ThMUsmZlcMmkumAxORsXHDnfj1E  
gmG7kiB9rWzkm5g1kljvu5GXgKyqm43H/wztOldFgqiQtH5hw2x8rv91K+84  
CQaSQyMHZLOxW0vPxzWMBLQcT8N2y2y8YpnhMehA8LEi2+G7i70xwytyvIBM  
gq461Z2FkI0j4WX3+zo0QfWJsBXHORt/v53N8irThNV9P8eT3LjxY4dr174D  
mtA225YcsDIbQ/LmGTzS1gRp+Tvg6kfonz1le2dkPrjTLs6zDshGuUrGGK12  
PtwHZqZSWDaWeSelDHjMB6FVezyFirLRmno9VE12Pjhs2Cj3IyobQ/cwRbe0  
aUDNQYf8th2EbLf2sbyLBkzkmQbc2ZWNJ68eeD8xqw5WpzU1yxOy8embd6dH  
a9XhSsN4ceaBbMxKazonBurwrePDxsRD2RjVnjggK6oOxu+e6UUxs3Gx0A5H  
8SdqUDLvSrlzjbSsq9j+FVvU4L1S0Y5F/GzMk+sXdl2qBlo6HAvtgmzMH3/x  
4JKcGoRaJv2SP56NXoHM/NeDqnDCeXP1bFE2dlHFY+/Xq0K3n/++b6ezcat1  
7KqwQIVQ2+Rs/6aEyI/1wqpkvyr47bH411KWjQFzqzSyQ1WBl0G7X3MpG8cz  
J8elnFThab4ss/RaNjrKv3+sYaQKMiXT7keqsjEyxaCgQkkVPKo+SzNrspF1  
941P3awKsBq7nuypy8bWuvlj+E0FHrxo5EU0ZGNE108DFn0qIPsxc3qxmyM  
P8v8fqhDBWD8tDo2Z6P+hg/2Zo9UIFks77V5WzaWsPSiDepVQJj3aOB1ezau  
eHjJvaZGBTikuU+M59n4M2Jw00GmCiidt/mx8FU2lnMUf1y9oQLHFu6Y6Okh

6r0lUU2iSgW0a0tmmf3ZeEivRMK+WgVKXXpFF73Pxb/fROLda1XAvF1Ftvcj  
gdevN6V1GlSgep2XSuaXbKzwt7f2ETEN5hOsveyejVa2nnsMn6nAw9haet9P  
oh691eeW96qA959Ro6zfxHxEON1R+qICLzKMLaymiPmZNN/KmVSBEPmNS/r/  
ZqNFY2PoBQIVeH/sGLD/ZeOf3+6uYZqqMHPZwueteA6amptWMoh6J9k6+nOk  
c/BqjlrBYKAqCD1IDLGRz0GXv/NMHsSpgnz3x63Zajl4r2rc4005VTgSQd21  
WDMHu9dmfprUAXqd/+kd5QctL6xULe4TxXMhBtZS/RykLTq9bGHFDWoyvmb  
+94wBx9+iFyyEtRgmYZVQa5pDk4MkIXJG9XA0+zsuQ+W0ehzT/v1pnl12BKQ  
1pDnlIM72tVvf/RUh5GBW012rsR7GHfwoI6JG778fSjRw56XgmuvnhGHRhp  
YX3LfhOwxEFceu+MOpwtt5/+FJaDII6lJ5ff1YC+uSkrTMnB9zslly+v0oQ1  
pbtKf1bn4OHNNqICgo8G3V43M1ybg2k93UVhcRQIe+y0+mN9DiYJjk7fLqZA  
zA+lv68f5eDcw71flWcokL6kcuWDrhyMENqdRbpOhawVJ87d7cnBqHXNyTp9  
VOCGpE/d6s9B3ke3njJgh8c9Dt7aSgHf3Dzu40IfnC9aWy8YCIHu4a9Xt8V  
1oLq1z2evOkcVD3bqHfIRAvqvt4/xZnLwUvJKm8qV2tBs0L+ioPiuRiaK521  
rlgLBgKtTkar5+KHvVqjDvO1YWgreSyClIvu/5U43TXWhm/Jlu7rabm4RWF7  
01c7bZg69fznaoNcPON6abdfqDYofN7jsmxxLjK2b3I3KdQG1emQ4zZ2uegc  
utVJolwbSLIulwshF9d4Z+3MrtEGAwvVY3puuWh2cWYH84U2QFLVV7mAXFxa  
s/CjriQdXDhFKBmciy5vRzg0VTp4FjEKhMNyUWih2QJ5bToENPg7Tkblou1l  
hf2FtnTYITkuGEjIxR73n62kbXTYTer71LMvF/dufLS0fi8dkswe2r88kluk  
IYs3ngw6MHwLhlqYuTig+ML2RxEdOBEHljWycxEMC6pHyujAi4/i1efmohr7  
75cLVXQoOmZjd6MgF88ptPxWfEwn8EDNu3w8Fw+X1OSWv6RDWZ3YYOnJXIyP  
CtvQ9pYOV55+tz17JhfDOameMV/oUDXwMrfoPPHu1bcwaYwOtWN33x+5mlvt  
A/DzyzQdGkQvLOFfzkVu+pbtN4R14JE6Nyf7ei4+iSYzm6V04LFR4jvmzVy8  
+JhGpirqA0lm6X7727noZbZhn4+aDsQ4vVb5VZeLAeK7y+9p6kDtE+nLFxty

8ZqoQmccVQekg+3dwhtz0anzu8pKbR0IHtrxVr05F39qPsr309GB8t2nkp48  
zsWzrFUJe3R1YHquQ4nRTug/cOq9QMie2cIVds9z8cZ+/2/vCf0TGtYuo125  
+DbQsYVK14Hhc1F9pT25eEms9ogPTQfSLI4mhvXnovDClKRokg6w65oV1N7n  
YnOqgyCSiLfbY7rs8cdc/HTqpoStgg4YvTR1Tv9C4MWhaKZbQgeSNq5/Y/s9  
F+/Pu3jY4R8dmr9z43/8zMWVx/J/hYzTYf7+BrkLv4n6Vag4mAztIVp87ELo  
VC6afBo4XNxHhxqBLqrMEPgdr6RdbaeDhNba1y3/clHpknPc6gYCPxWs3Wki  
XNhx4xJ44CodLiyPkVkiwcVld3f7GJ6kg5svGUrkuhfmbNHp9j100Nlr/SpY  
mYvJE4tcakPpMBSdulNjnYsW++xVZ5bTYfH4ValmTS6+1ZeyzjamA/PQu7Op  
VC7uK13VtF60Di/kVOxt6FzsL2sa3fpDG/ROuLz8qsfFby+MXp1v14bGylKJ  
dWZcrA5ibmRyiPlxfH1awYKLzUl/fdSitCHysbTdllysukjk6jMsO2iAyuG07  
1Tlu3k1Lvl38TAv8dp4SGwYuLuKb5nISteDsTEfxaWcubjxvpGyroQXOatbP  
5Dy5uN+iyYftRQPBmaiYRh8uzvm554u9pcL7BUdFkldzcXJCfCA5lgrpbtM2  
n404GLpg4L+xPArc29tw4v4Wlh5KyEDIRxIoio5Z7dvGxak94+WcVBKE83Sf  
Llzoqx33ztHTRIIXWT9K0rkYnzhE1G7NZqAPd6Re5lclMu6beH/WgPq7V8v  
MDvHxSqa2OWgBWqgejRvuMCF0mLBFZyA6oQM6vyY085F88863c0PawK6vUr  
r925zkWXiv+4p4VUYydjo6VXA2HfpT8raFgZ7p/aqPLjARdjvC400JUupw3yh  
f78ETVzsqXNszt2iDI0NS2/2POXiiSc/vnoOKwHF+eqSmD4uKppkSDoLKcHu  
s97z5d9xsVdSzdmkRRGahYenrg9y8aw5pyA2XxHiH+jV/vnKxbUOhgslzRSh  
Vff+iZM/uHjbrjTv1m8F0GZsSHb6xUXTqG5QPKwAj1102L0nuVj38mV4e488  
aj9fQl0wx0UF6Yoky3R5SBR7OdsxLw9JzJggNJMHnUcK/82XykNZs9rba7Pk  
YL8706lMIw9DXTSlbcNloaNUR8ebnIfK1Xe33KflgoFkg/BPWh7uMtxJH34j  
A53N0w+WGORh4UfFX9IRMmBkfKzkjXEentSWvCzkLAOpbBvmwQV5eGuJlkru  
mDQYe+50a7LOW/KuerVNudKQWi5nuM02D2u9fYMvhknDC+kKCQX7PHRKVsk7

aCkNaY8/Ngcsz00vflR5+U4KukwzLk675WHkqtqt0nelwCxHm1PsmYfvRWMY  
5CNS000d4jW00g+tI5jzxUEKzC9PmXLW5uE1i4fbQuSkGCF3RNZ8XR6amEvN  
G3ktCRZPO54khOdhgojb+fvbJCFrlZuvWFwe1lkvqP+RJAFL/Bat1cvJw/Un  
010z4sRA1u5ghgYvD/94bLYNNBGDAfqT69KH87B3s33g/iFRyBqNlh8tzM01  
gQHr/24ShdDX1faDp/Lwe0TU+kl9UVh0T3Tbq30Efc/ZDMawCPTwTjfdrchD  
Z2pYPTdFBK4kjYxfu5qHwo5j8uWeIpARbq9XciMP51Wc/yegiECQB8fv6K08  
fDPTd+XYmDCYWXSnce7koVqH0DLpJ8IgNN/g6oH/8tC0Yc/9xZeE4eW/PX07  
H+Th0eiiTTt4wID+6Z5MZFMeFo4csJ/dJwyp7Qp2gY/z8Jzv+e02W4XB79b6  
aM/2PHRr8lWKChMGw1MVRxye5+GqSI8Vb9YJwwzrT6PFqzz0eTBq+SLEGDpi  
3X/pvsnDuwcrv72KFIaSgAK6xts81LL5eXgmXhiS4MMq6Q9EvVIVPUtyhMHb  
YFHq7FAePp1KMqER8dHID176OZyHZpDnf/u5MEyMt/V8GMID3nDNUKOICLT2  
kaRejeXhjuMh//LsRaD4YfSS1ok89BvqrduaKgK7L1dH3Z30w3vbzzqcaREB  
9wLRw9fm8jCgWek0kyYKXOJCWD2Ph2mHecKbD4hCkqVvkpcID8u3MzL4RL8i  
DPYquIrxMOabn1NgsBh4k4ovgAQP3a5uDBZ/LQaL5R862ErX8J6v+vfVeeKg  
LfztxSIZHoZu79JYPyUOMhPK203leDh6UuLP2eMSMPFlqYi+Ag/vpClclXeX  
hIG+8BM0JR72Xl0T9ENICqoeXmIWuOhaYThnFehNBTffrlBRoOHGynpSzan  
yEDW5ZkjUU0e+vKv9i3aJguhBZ76UxQeRmhqDmvukQc39q66URoPczZp577I  
UQCLA8fWfNXmIWzzyK4PVgSxqKFD/Xo8vN5JN405oQQ/g+Q0uw14uKSorETR  
TRl6vK2vPTPi4TOLhSvb/ijDFev0/kYzHnr8Eo+lE/dMgChtWYU14U/f7V16  
pwaUnVv7e68LD2dT9hxaK0ODW/5nLq9y42ER9o6Qq2jwS0z7ZkMPHn5b29gX  
uE4LBrwXnd58XCB0ss1x721gW52o95mDQ/HZ5PCnQk+ZNE3t1duLQ+pGXcl  
GHfpgFzPRR8DeDi3ft0rYYJ/hP18d+5wMA8LhiN0bzOJ732VivvXRh6+tPd9  
rZikCxejQp0fb+Khg9f7BS7XdKFGvezv2SgeToVsUr41pAuvkhxj/bbycCB4

rj50pR4MGWcbmmzjld16Tpt3UA8meroG5u3godlQjZvoVT1QdYhdc30ngY9y  
E6VrkvqgO3Jblr2bh8plTas+W+qD5SmxR+HxPKzy/8qMCNEH33knbRWTeJjJ  
F8jSSvVhQ+Xn0U/7ePhJdmZiQ6s+xG6yrvgvmyfVcjWyH7/qQ+7Dx9S4gzyU  
Tfz1/baxARQlarxyO8TDG81Ba6TddOCS4SYeLYOHNnt7NU6FG8Cd7isrJhg8  
lNu7KytpnwG0sqeFn7J4+06u9NgRngG8tnOr05/FwxVOhWemzxvA56/8hAMc  
HvZNqA2eu20Ak0V95mtzCHsvdojnPzYA8ZXGn824RHxPC9Y2vzEAtX/xZOR5  
BH5602guwwagd60huJdP4HWMfkV80gCsN8qqVuUT+UtsX60obAjLIYOeZBfw  
kKLgt3ajjCH4PTjH2nSUh3uFmsSnlQ0hIv6H47LjPKzvuFvZM98Qdukv+6Nc  
yMNDccYXRKiGkNbFqhww4uH6wZkFCVqGkJfZue1+MQ8/K5seXahtCMW2NP0T  
p3lYN3HB3Ip4v/xla/+uszyMZW5ySqMYQt2Jm0dXlPDwanUaigZh/7HXvNX0  
Czx8ui9GdkrJEHpmvKX/lPLwUuuJMF1pQxi+f0xBx0Ue3i96teG4kCH8CRtM  
Kasg5uGjyvrgcQOQVLRynHaZh/KFzuc2fzaA+feSfwRe5eGWyoCD9a8NwHB3  
U9nC6zyMpC+HiBYDWKyrEiFxx8Bj37SZ3y0DcH0RRn5bxUNB785j3HMG4M8s  
f1FdzcMxlWNPnLgGsPuTk/vmWh7aCT9qVgozAOyNko2q4+Hmkzs/WzkZgMlz  
tkRUPQ+tHQ6LBekQ/a991rTpPg9TVx+o03ynD/uvjhtuauShMynmUeV9ffAo  
0cyKeET83su53/aCPnzM3eixsZWHy89uXX9ztz5UpTPLwtt4eFs/PzCNwGf6  
3ouS4U95SHoSynznSuB1+5PoDR0EHpqsLB4s0gfaxtHmsE6i/s7MMwpa+vBt  
rZpx2AseqsfV61yX04c7nkvZ67uI/PZ7z/Jn9SDI+tCK0B4eKn0ID9YO6IGB  
8fmLlb087Ly8JOPVcz0Yp7ZlhfTzMFxm/ZneJj1oVP6+NXiAhycT/2RW1emB  
QEKpdd17Hu7025e2oIPwmesTdYN8vDqcc8XzDI9WDgaxAkalvbTkp62Naf0  
oK3ntGfgMLGfLb488+HqwYn2xvKAbzz0G3betZKlB1sbP0sHjBB4u6nwhp2q  
B+JXLB77jxH9c7hlFRynB46HGrz8pgl9i4Xz5vnqgXziYMXqGR4yjynP7HXX  
g94YSdnVczxMYnfKpoAelG8w2+4rxEcJy96USWs9SPL3bVslzEf5e0UFL0z0

wG1FvNkqUT7uiDp0elZLj7j4j+WsFOfjrM/kUKiqHlQaDnj7SPMRSr28t0zr  
QhpF9LK3LB+vJlJODX3VhVVKRnLe8nxsWi6i5NarCzRx7x1einyMw5tPYx/r  
wrfpuCeeynzMOZGZ5nVbF2p/5C/wVOXjZNqnuEfnDYe9eCt3hTofM3Sch1p4  
umDw9J+PB4mPp/2KclUidOH3fd0r7hQ+/oTE1eYeuvDglru8042Pr878u7ff  
TBcEl7bFumnz0bn8vNEHeV0IP5P31FWHj1qZL5+u/qED5kdumLvqEfFvmZm9  
9kQHZjivuc4GfDywl/Pf8EUdOB6vtWq5CR8bf6SeOhaiA9Fbl191NuNj5vWH  
HQMWOra4bIuCsZkfp8P1py+J6ECn+9V2tOSjmctg8P4zdDht/3whWvOx/CVV  
33c7HeIwTeY5LuajtqK+3BprOsiSHX3Bjo8Dy1aHsu9og9CTzE6yPR9PLv51  
cJJVG36ldvj/ceDj7dZtGucdtaHn/cZ1VU58LFn6Z/z7Ti0oLWdEmKzgi2X6  
P0kFWSqcCH0yKOHFR27FL8I5myjAIVff8tGbjxaSLicDbpAhfnfptt0+xPuf  
ly/Kl5PA2a41Xj2Ijzrx7JrenRqw+Jvy5K91flxn1u7WvKcOxsUh+56F8FF4  
ffzNRBV1UBT+fiBnAx9bDUxSB+pVoa9FIVN4Cx+lL1o38CyVoSM5SGogmo/N  
25wjRguUoHHBmey7MXycYBkNyM0oQjnfkpcUy8fNul6WvDMKkLRu7fGRBD6u  
/jHmdt9eBrbLFJPb9vKxRvReXpqVNGy4O3Ty4j4+zhvrX/zdQgrc6ElnIw/w  
8d3gul/bUQKWpm/Qcz7Ixz1VYZVP/MTBjClVqnWljw4jwrpJ28VA5cuJih4G  
H99b7tvuWi0C4oUffTsw+Fgh8Wvk5pAwTHubXSvl4qPe65BEGS1hGLh2t8o3  
h48GEp6fhMqE4EWE+BjzLhFP0Mjv3tF/Dk2qq27L8Aj/Dx4+rimZc7iSNHD3  
UT4fd2pL7oIMw5nTlyxpICPgeeaVdYZ/HU43Lvr/qGjFTYoeOD2tMOWdxa  
lw3H+chyxcxLzn8cklGkyb6Qj8smW7Z99ZpyiB3zWkE6yUcVry0lnqmTDhEl  
hx9PFvNRX7qhR6NxwmFtQJ/Py9MEnuaSa05Tjxw8JA06Ks/y8eqo8yfl7HEH  
+9pYP14JHyMv1SIS5MYdFm6/9WLHBT4+nOL1Xzz320GHJhToVUbm76kt08ar  
fjuod3i8Nirn48Ztn+WGFx47SKXzQ8Qv8bFM7879JUO/HGasevo+XOYjtSDz  
fnjnL4efH3XC710l4mWNV1e++OXw4ei298XX+bjr3qUVyd9/OfRYxUjuucFH



S/FTYu/Ivx062qPN3W/yMTG7dXxX+G+HR9u2+JNv8bFIbcuKvXd+09RJbN7/  
o4aPn6MvLbRbMO5QeS7y9INaYr5XdL4SqR53uOi46dHROj5uTVHcRQ2YcDj9  
Zu03bfV8dH1YbNIhN+lwZG+4MjbwUfRzIVVU36RDjsoGW9X7fHS/yLmj/3DK  
IePq+rDPD/g4/CRwNPjhH4f9XqGMuod8vKPP7qyf9ph56fgcl4TH/18b+l6  
KM44bM5Y1xHZwsfsxbdTBSGzDuu1giZsHxP58fkuiQ1zDp6Ba53fPeVj/brO  
zRrfhAB/rYm+2UHsg00lk60P58GSPD8uu50wtz2wqI/g93pNq3oWdfGRr3Tr  
YOU5USBTWikk3s1He17x97s3xEDxn7dBz2s+/lrX8aT2mTjMLvbcnd7Hxwtm  
ml4atlLwu9PjWMBbPnY9qzvRvEcahmPd603e8THgzYGOZ+dloOuCi/TzQT60  
qantfPVdDq6p057V/cbHQ8nvxBsIleBCpUPz5Hc+fnKHnDSGEpxcaT/y+Acf  
L/+30VPyrxJwWEvt4n/xsdjsT9GLXmVI07EN9xgn5nVD59E1Hiqwt34xizJJ  
7OPatc0brqlA5IRVZ+M04X/T0uyCRFUIFlhOHZsh5mtEcu7PC1VYbb6Itm00  
j+G0jVs2WqgBbDaPURMW4M1Bdv+VfjXQ6DIS3iwlQEFCZ0kKRQPkdxxsa2ckI  
cDdzRmnRZg0QlTdyKS8nQM6i7ZPPL2vAT1fdE9WKAjR9M/01eMl8aL1JtZSY  
L8ALPcP3zi/WhNQC5YgyAwEO1DasHv1HAuuEL+YlRgIknb5cMyODMP+DX9P  
mQgQbgQ8uJ5AhrWqsQVHzQl7N72fC30lg1l+SzNrsQBTDV7IzHZT4P3u0wXp  
tgJ0s57oIvanwlG/vRGpdgL85qC7RsSfCsLK+jMJIMCgqz6Jns+p8JqXtjDK  
TYBFP6/m+nygAXdn4Ey4hwB3No6ntJlqgYuveUuopwD3R58/HZGoBdcUeiP8  
Vwpw880kzTZS2rD5R+VCX18Byr+tnFGx1AZyO3vGy0+AVwr++K4I1QYWd8mR  
5QECtMhjBIrc1Ab7WPINjkECPHKpqvDyB20Y8/m4cFmwABUoLff+qNBhvVx+  
i2WYAA0uJL66v4801jkjM/TNAmQFt+oahOrA8LaHLdRoAZb9Fd79/bgOnPIq  
OqIZI8CmoPYv317rgLSMp4VSrAAvj63M79igC+/Y5zcJJQpwnlIDbwh+cWRr  
isXMXgHOXjF70nNDD7xXrJmd3CfAHTui1l6a1IMayXlHfxwQYFfMzLW4VH3g  
Zoa29jMFu01S6hZllgG4bLE62pMpwKrGXFOOnRwYw7SYd2cUWYMWv6A35YoYQ

JV4z+yRXgIsDHHzwPGQIpCFua0ueAA1j3hdm3DWEjodRRx/yBXhsrRw/a8oQ  
7Jkqi+4WCNBvz6MtxTFGMBY5PFtz9P/x/k7JOGMEpS73WquOC/CwRWxHb5cR  
KlvGRV46KcAP8ozjh+2NofmD66KyUwlc1mlwbtpuDKkPKHPnzgiwLi+Tr15o  
DF/SW48WnhdgsPUU68aoMTRqPWillBL+1/2uXqphAsV19xJWXRsg8MD6V+12  
JrBv3d1I4woBrTIIJWGMoD/RM0akctEPct7KgeTTcA8v8q574oAE7tOdjoe  
NwEpi2uLbl0j8De78NkmKhMYbKvQ5lcKMFvlyy54YgL1W0sVtlUJUCuaHID/  
wQSOiZ+bc6kW4CvPRdnPjk1gz7ni77QaAa6Q2bV8s5QprMQTvVO3BTg5ZXS9  
Zr4pGPUVPO68I8CYTe/En+iZgsh+fu2luwK0P3E/MdncFPrVcy+y/hPg72/W  
VpE2plBzl+tY+D0BalfwYhOWmkK+LyPT7oEAffXMq07amULs940Jqg8FqFgW  
ZdpqawoenOSokUcCHGXmKQ1bmYKu4V7/5mYBpsiJ4ldTU5h7sHv52VYBOnHJ  
X+5om0J3eKxlSpsAXwaa03oqm8KN2a30gKcCvH37cDxDyBS4J6IULToEeFck  
9E7QVxOIXrLxn1SnABsZd91udpqA84vQkQ/PBSiXa+GRVW0C1F1BfXdfCvDF  
tqCx/46YwJScf9vRVwKs3pm7130PCXSWr7qz67UAA78aSq7m8Bld69yrzfe  
fjBN61Wkm0DWoNtx/T4Bnj04om08ZgwONNj7ekCAAedjW2KyjGH+naWbb7wX  
YJralsFOH2MYC7RZmzsowNbumCpe8sZQxjezcvosQI8j50mYYQTP5kY65GEC  
XwsD/1ktMYL1j3WVxr8S+yz43efqIUNQFiP/KPshwDdnBvj1bA3h2xn1/vRR  
AZauF6/9RNxfTaD8JPSXAC99jrry09EAUpKkKhQnifmpsHpcfFYfPn2d3Jw0  
J8Dza+otXj3XhftZv9b6CeXj8oUz81yidaFI/4eLmXA+nqJ57H4+Txf8Ngzp  
DIjlo1jl1Q4TFx0wm3mnVCuRj1UqNIU33+ggcbxP6LBUPtqLYG7qCTrUdb7o  
d5fLx/kSLl/iROlwJK7jCV0hHy90J2lcaNCGXbjtdX8V8/FEpbjB6UPa4H2x  
qeKlcj7W/VJ38HPXBg03ByeuquZjy3Qn45qSNsz7UM9mq+ejh3ezZ9g9Leg9  
Wju0aX4+Ui5+yMVEa0E1pXqLaykfk1oCdOvmawH/9vUADUo+usVEh3x/RgOT  
E8xv82n50DiQkGWbR4PG/evSSdr52L/478jzABqEhSyYT9HJR/Pze2LOGNFg

atm8K1S9fCyJDO5KF6WBgPJyuZZBPspfMZEPHqaC2WzZa22jfHSp3fBdsocK  
j/pS4nRMiHjux6/aRezz8HpfMT2zfAybG1RI6KLCdLFeob55Pr4vNZWeeE+F  
wwenLAWt8jF18oFm1xQVzMPbHhlZ5uOMvjFpUoMGzXg61MQ6Hy23dw3ZIQ0i  
6PFjpvz8bewe0jGLhrMzPPIWmCb6q6E36VFTQ48p5MW2iXj5FiGy5eHKHB  
wgc/bljY5yP3/cxSLzstaD73YIU5CPjl+dAEIcLlhhH31ohUZ9djXtVv2rB  
TOS2BBvnfHT2HPv+z1Abjrg6yixxyUdxL5V4bpg2WBionLF1y8d1r4TrDI5r  
Q6v4p8V2HkR9slNv3H6lDXNN3AgH73xs6lOMzg+nw7GyiClYmY+7q84K1ZXT  
wZK9mIu++Vijd+vf2Sk6bP5fw1UeT1XXhVVEqGQoIQmZ5ynce1dL5vH1GstU  
ipLQRKMSW/SIPcMJUnIUBHyVZSDJg0qNCCKiDQJJYr4zp/rd/be69nPsM5v  
072rtvbiY51100D288rwtEl3kVMAH+fRG0PWL1GFzaWzipyD+Njn/cDwVbwq  
Cjx4xXXdwMe2U2deZHxUBZN/4sPcQ/goNXrI+dy9lZDd0lTnE8HHs00680Pz  
1cGsMtd7bRQf1QwfJWxS1oDmzOgv63awfHneMdlv0ABBL4UlgdF8VNaslx29  
qgnbXm+L2hTHR7Qoeps4oA2CN1YLhibwsWzJh41r9utADi2VtTmJj90W4afX  
SehC69pb97ce4qNbjcMTR2s9s0wUXbbjGB9j+IKLbYMNYF5PyZO4bD4Gxzju  
rBA3hsJLxkIxOXycI/R18cIQY1gTUwuRuXysL79hLnvbGOJEWyoCC1j/uhwL  
l4gygWGTCRqu8PGswr705nZTOD6T3GJWxsfKJRXX75iYgdZjMTH9cj4qzqdn  
qZ8yg5D1yx0WV/FxiGv9ZbHtKmhPswsRuM3HsdIUozOHZSHGq/ncRC0fkrF  
dg49MwFj5X5tw3Ws30TaVedJW4BLVaTT+7t8FEw77ZJGWMcNhPGUjvtsHo7W  
DH95bgGHHZnrWxr5+J95XPgCEUuoe0cY3HnCx28rLFcfj7KEgBLF8JqnfKxY  
HvJ4INsSjnYX51c+52PzP2npfxotgQSjt5daWL359XKN3y3BaN7txfkv+Hir  
SUnCWZoDz1/Yup99xerTVT8n1ZQDEtnP0/htfFySf+P4bk8OzNu67m56Bx9l  
5ijYyURxoNC4byqlk4/r3wreD0vlgPV0hFncW9a/Uml5EWc40PPw1/bobjav  
h+v2LL/EgXh+UknEe3b/krqOxBsckAsS7QvpY/1blLPpWAMHbmgQCoH9fBRb

GnPF+iEHvH4s8/H+yPLvss6l4AkHRmqLTrp+4mO+ysbOK2x94ojhI9svrL8T  
C0f82fXanrdmwzc++lrx1MvZ8x4us+WafWfPd+Jf7P9QgefxeiNsPMvrtZ9  
DYtn9rW1V9V+8LH05svoeBbv+fjeQcUxPor2nJFdy96H6xChvGScj+IvVV42  
R3KgXfKX/8LffjTYk7Z6wIMDMW8TSeFJPjoXvR+lTDggWTzv+cwUH+UdrQ+/  
l+RA2S6+yMQ0H3u490/d+2YJzrxla4YfCHy4KaEU7lvCoHDRgcHZBBqfT93p  
dsYSUlS/tcjSGBk80jM6FZLUD5XM9Q+l2D/Tx0emqtYfY2eBT8SJVDj575f  
jo0W8HvK92yDOIEPHgV+MzhqAVTj+5fVCwi8N7l02UVHC2gOGL0/JEmwT9Xd  
/+kz5hCpnpicJ02gfNrQ0TW7zUF0VORW1mICr//m/Xqrag42/ynopcsROftl  
X+ti/CqYu/BJWrACgY6Pzi7o1VoFD6nY/lWKBJ5+nb9I5pUZuBS+zv6wgsBT  
hZ971yqZgef9DDHQJFBNWoZZlWkC0q6rt0hrE9gmq5gvpG4Cr19+u/NZh8A+  
uWOp9TeNwe+D037agEDB0cmKiVYj2DhH6NPwKgj9Pnyt8ug1ANX0azaNFgSG  
P+3OCAsygAHjbnnoATatszOvFemD+HKdb5Oqwk8snzb/t+JurDTKvZBvh3b  
38j+oH+bBiQlfsv38SYw1veM1+xyBVgjnD2j40vgnNe+wrptS0HwpJP/nHUE  
pjcorsgZWQxHcookywMIrHRYZ28lsAh01gYnzwshcG+fipmexCjP3VbibXco  
gQ0LdGKz3F7yJJ8y5te3EChgIeRn2tFdS3XJD2/cRmD7yeKSw6cEmJzJV0G3  
d7F61VyvixuSYjakHKrjCawPvdhqqfFxyymPHirXsILN+VkfzEfilTKJfx  
VGY/gTuKmvRX/6PIh0WB5tcDBN42T3kj6qfEaGl903QnntV3f73lsoMrmFIL  
J+72ZAKJuPftC6+pMFENE7RtCoEKw+o3u26pMgaORT/kUwnM0HhpoVmzkqla  
K3j54REcm11VrORodWZPT+Xc80cJdB/SULgco8GYhwVvjDnG9q9ZF044ajK3  
9zJLITNY/LzZY04tWgzP2lZBKZNArwy6p5ivzTALmhQVCRbfoFi5h6MOs/qN  
xwoFiuUjHoctRnWY+osdKnKn2fullJb1OKHLW03coCabRWCE8facE8v0mDvc  
jxqLswlsuqP9p/e8HmMjEqUtnUNgdphu3hoZfeb+i5+6krkETvh5z78Qr8/Y  
nT9gIJHH9ms+VDnSrs88DJ9tvKCAxZPkjkhIGTCOZmmm4oUExmWsvitvYsA8

niVhLlpMIJgcbpnnZsA4P6UsRS4R2DuX/9k32IBpOr2MN/cK6//8149mIg0Y  
15CC1YJlrB8LG7Qmdxswz/S118wuJ1C25N5Da7b+Z7LCRqCSQHRwX/9imwHT  
/MDcfvoaq4fiq5L8QAPm38w6x6n/Efiz8e6mMgcDpjXQzuXPDXZ/9zGHbzoG  
jKfmU7eJagKTZnKl/EQNmJc/Pf/9dYvAwSPvBd426DM+9W88f9YS6JLZQTgE  
6zNt6cE+o3UE6nil+X0e1WPW+g6uHW4g80u0b+P/9ugxb5S3+w/dJbDrWa5n  
zlddxn9oLPDrfTbvvx/E0F66TFd13IbPjQRKVF0uIMp0mMDUOZsGHxHINTPw  
TfujzbxzPxo68IS9z3VTwa3m2kzPRzq89zmBjkcdNG+kaTLB1xQje1pYfp1l  
T4qf02B6Ey5uf/eCwIIP3x7L5akzH2SuRb9pY/2zXz9XP3klE/reYm97B+v/  
vkD1Zf6qzMCV+tjXnax+M4s3nFJTYT5ZP0to7Wb11Sxr6DylxIQv9E5ufk+g  
iNO5csNNiszXN50pz/pYPOv+jnulyjNDOz8defyR3R+nesxopwwzel6Qf+c7  
66e/Trr6mT01u7elk/UjbP83VtrWb4Zrf5pJnmZ+sP5z1MklztXU/nq6/FzN  
00vnbb8shJSneZOTlkWVMwSGOVS4W3TJQlxjQ0n5LBJFUv0XDMUvg+IMhytl  
c0jM+tldbrt8BQho+VRcEiaxId4ndMcCNRBcu/NW3kISN68bk9T3MoBLPQo9  
CYtIzE0MPSKcbwjuWx8K+kuR+LNgXFDjhBFk71/uJrWExBlZKWJRtSmYnHva  
k6JI4v5dNpk7kjinwZmWs0AYIEq0j7U45D3EhqUxVi6tM4oIcv/j/eQI01R3Y  
/XmliRRZxRE6hBDAQzk3VJfE4Tdj1++KWoP4tldaVvokXlmkpvEyzxoqfyT9  
s8yQxISvj8IFVtnAtGD76VcmJC712phBedpCwfGU2gozEs3v7js61mkLTov1  
e4+bk7jn7PIUvw12QKkf1rbjsnid95xTCrQHbrmhuzKQmDe39dWeV/bQa/42  
eno1ibLfZSxrHR1Az8mEuW5NotaCsmuCao7wsrW7N90WxGXqZd1/jjvCfv90  
4e32LH6joZAnI47wIKLXXd2ZxMf9qcX9V5wgYux4zBxXEru2p8WrCjqDZIJF  
VrcbiWoVqh3qvs5wc24/c8udxNasUrvPF50h6GRGH+1BoqTi/n83DzuDoCxX  
JNqLRAmDnkOUmQtcyv2o4+5D4q//mUbe7HOB8QrYI+JHotds4UOa310gx/Jz  
1gd/EpWK9J78UHEFm7tkXX0giRHHzv3w8XKFz85WH7LXk5iSX3LENckVMI5+

FYkNjHjbbFMa5ErmAWe1vXeROld7ZGV3Y9doavf2sMwlESbxHab7Z9c4WDU  
9z3zt7D1o6q/cXPcQGM86+ynMBKH/nR2zl7qBs8S7ervh504Q6ggfFLTDaJF  
Rj9ciCBxrGOjabCZG8idOjcvIYrEy1ujGvXADeqXOur57SCRuahwJcjKDTbn  
/fQw20ViQOLdqC+r3UBc03evZDSJ5R9vZj23cIPKa87ZQzEkfnrucUtl3w3W  
csfrH+8l0Ujzo/+R5W4wfS+vvzCWxjsfngh7iLlBgaubaMoBEi/98HEKHHUF  
p9e/9dbHs+vt35UVvHSF4aCLnpxEEuObb9QrV7oC9dF935JkEquTLMRaj7oC  
d8dU9o+DrB601UtLg1yhd6Ko4fkhEq/LHd9bpusKacmeA5cPk1g5IFrePO4C  
Rj+ryhK0kOjzx3vFGsYFujYv3vvvUfa7cP3pP4kukNqxd7XqMRIP6mwc/cl1  
AT2XDuHx4yQqHPYW1RlzhjbGsvnRSRLHda/dzip2hiTD7NPZp0g86kr0c1i/  
tC5er7mGZPlwtBWbVegEB9LqR6RpEo1D7evl7JxAdWpFzcfTJDpsNgzwe08I  
e99/cDqeTeLDEyuq585zBCUv06kNOSy/I+uMYkkHePygqNMol0S5q+9mijk4  
gMKV8Ij2fBLhmqHcTwV7uK/YZHL5lon/mhgtjSTtIOqU7t/4lhJLD/d1vxGx  
g/o9w8dVLRp4ZWpNknpsINRqz9WoShI720BqdcwaWFDVtteqisTT4ucf6PZZ  
wU01C5S+TmLa9Ggpz9sKRMWnmqurSdT43n4xzBah7HXyqGADyx9xwUCgiAu+  
jn01bXdi3BcmclIXzwGB2zYpl+6xesztypDpsQSPC8LS7g9J/GBTIDxlbAGT  
Ulu7lB+TWFM9LZCxxRwKdj8uGHtCou35E+aeF1bB+Lbjpmefk2i/admXG2pm  
kPtU6G9kC4mNMok/BHaZgt0/7g/wBYmvut89e3jHBLLNpHwHXrPnbQpaqhpt  
DDjrzd7DdyRa1ty7abTIED7t/oOCPSQ+YRKks1MMIHPAf17bexlPex4asfmp  
Dx+eKGBf9bPzqMr7y6V+XUijCm41fmX9EPl6YlJei32fzD2UNURi+Ozyq6Pm  
mtB1YItL5DCJGwWu9a731wC9YK23kj9JHDhSP8q5qgat2uXTgZMkFn17aOiW  
pgKWvZ8i1/5l85MjvkznpjLkn1Z56zHDzs8r8jEDn1ZAtBB9y340hd2dw7SL  
txLldMfvMxSj00cyUdsYJwcj5I2P2vMpFE/f+7TphywMOI/4qC2ksEfcNkws  
fAlcvxliKi9FYeVHR7rUXRrWZjqPCspTOMW10pnbKQb1DqnBMwoUHlk/Zdae

LgKaM0zzb0UKr5w08Q3REYI/24yuDilTGC3WE/Iqaop31nZpRLsWhUk/dL3C  
/7tRKzjl0dmqQ+E05cdmOl96ayMqjzk91aMw5D9ep2PZSC13uYDmHSMK79ZV  
hdvtmMW8mxjov2xJofY92/pXWpKM3VUI70IuhUMW5L3JamnmaqjfvVyg8EHA  
tObi9UuYpNaneeQaCuuqc9LllwrMiitV6xOdKDz/h96AwqpMyPqDHR5+FD7e  
J7nxZIg+0yRz28E1gMK3SZVJMSEgJGnT2A37IAoFnKQkvkgbMnMttlLcjRTO  
/t6aQG03Yool3T3Vwils1deXdBM0ZSQepd1RiqDwgFWs99ILpkxs4l1D+SgW  
X5/m/mkLM8bpq5mExC4K522g9s0ErWIq83YkikZTeGeq9s3Jz6sYuXWXhgT3  
UChcrqKvstOc+XJ/2dPfsRSe7kmq40RZMPss4oJaD1B4SP/queQuC2Zu6Zvv  
l+Ip/L7ZpirJ1pLhK1kkpyRSWNhS4SdQYskoEbRkQDKF8rfCBhvncpgy4V/5  
JikUVkS9qcoJ4jCcA16m81MptFm1b4lLOYd5OFT5oP8whdwN17bQkxzGZ+Oi  
tcwRCn+a/J2yRy7T92r7J+oohYECjXorE7jMDsdn+7cfY+8//6DXryouM31b  
R9zhBIVFxefvH/zAZdIN0s8pZVDYJX+q45Q4j5Et+KT3+xSFjyobP37W4TGF  
SxzqW/gUlt+ssve25THG6YX/XilpvLrvkftpbx5TPy3Yd5CmcD7s9TsQyGPc  
dm2K9j9D4Yyn/u37ATyms79ByOQsq6/QpqfgyWPC1inR4uco/C8npb8Uecyv  
pgSN/hwKE7bODnijymNS8G11bS6Ffyrj6TPcBmJKo4zlUeh2t3uhiPNXCZH  
PasrqoDCpYNKG87QXEb77ESkfSGFjhGpNYe8uMzNBb4zy4spfJGVoCEpzGXs  
Dv4vY6KEwltM/Kx5VznMizEp5ZbLFJ5V+Zlt4MJhNmzdda2klPWDtKeH+ztL  
Zqir2ebgVQr/7RKL1Q+1ZA6467/2q6Cw48HJMLLHgqFWfZ0Q+x/rX31mRrLK  
nFG97HT0w3UKM2ycfarFzjkKxRL52psUCpaEvZju4qBTOFSsoati/97Vv2a  
MU1CmyHqNoXex5aesz0ZdbF3ntux7D85Z3MTv1qwgx8VQ5eXk/hb2N/RS1B  
E2bWy+6U5rsUMhM3xF+JGjEn7EGm5D6FJ+9oa4T/NmAUBmUXJjeyed4a7Xz7  
mj5jlrufkdETNp+p7Y4C3VpMxI4XC8hWCifqx0X2fFzO/O4zzl18SaGsQJY4  
J0y00eybYWj3mp0PTg9XzBKWYS6Aq9d4B6t3cvkZDY4Q81q88cy69xQadOSk

LyufBSFJK7WN+ijcIHjvjWuXKIz8SLkt2s/mb57TC9PBRSDeid23Btk8rBCL  
MkuTA6uSGIXFYRbf2t1jrWtWws3zwlD0Ryn8fNN05YSvOhhQXsa8n2y/WP3C  
DwGaoJgyZBUwQaHE316hu2a6QMZyHm37Q6HptZlz4uL6IL7jiPuBKZbPtg3R  
A2EG8CdAeX2WAI2RlxNPIS8xgp2e2wdKZtN4bfj08IM+Ixb0vB1ZLUhjT88W  
m+3FvxDazCeuxYTG/QHG4y3ypuCqmqz9nUJRGw4jrF248NoV7KsNHx8VpDJwz  
JXVklxIUShw9s3grJQU1nYJWpatAU7hNSU2KRhGvqUBvNifcvyrFpjI07tjy  
1fhKkzmc+Fx73WspjW+H7MViWyxA6L0ohMjTqNVI8VHOyRLi2nzv715Go5iZ  
yJjPbUvYdm/kReYKGu2V7f3HjnOgtwb881RovKELJ1K+ccCvIr23YiWN0acV  
i+fYc6GlqH1rgzqNT3K0qfQsLjjkrBxp1qTxeHyxreEgF+qIXft6tGkM2tme  
L2rAA7P0upnvujS+Vz59TncXD0qTxf+b0aex+mjQivlyHqjuW7dgoRGNxzQ5  
8sX9PDgbVUgqmtD493nbPu0lAJKhPxT0zGgsq9mr7m4NkOaPBTxzGu3UgqR1  
wgEEPI5ru1rSuPmfZzqv0gH2OrypDOCy/O8SCwouBhgCdcslGLaS05UAew  
2TS64QDSu3rd93+VoC32g006WtolJl1fGLcA+ClvKA5y4bGvQfXFKh/Yt8f  
sv6+l+xo5C7eaR7xDcB6YfG7agcaZ0kIxXh6xqhsdBHTjRGXTGyXz0IYDhl  
9a3dhUY1DZfs3+8AikdPRA+60fi07mRwQAvA8k+dk+PuNDu/8VA8i4fq1kgR  
9qRxn2neyK4SgPmvY0SXeNN499g45XES4FDTnVNqviv/oyNBRjsBJu8sXGq2  
j2ffxQ0/gHYVR2Qa+tPo2aXm7yTjScnqyXq3oE02nRI9Zf08GBD4a+ykPU0  
RrQppG1t5UFbtrVZdDCNtlKlPzMv8MCNn1GbsonGE9ajnyVZfe6nvbXhh9K4  
c1rZf4sTD7hJWk15W2jsCN0wxtPiwbU9ez0rt9KYP2/S12IRD7Qi771p2EZj  
Xqz1iqlpLlzYtGhjSyTrH9uj3zV+cEHWL+hTz3Yaq/4uD974jQsZ7pd3DO+k  
McHQW9qZrYXtj8ZndtP4bcf+otRRLvfwf04+q8g==

"}],

{RGBColor[0.880722, 0.611041, 0.142051], AbsoluteThickness[1.6], Opacity[1.],  
LineBox[CompressedData["



1:eJwVVHk81IsXHWwPfkWylaWSLMmSjH2Omkd6jF0vZI+yDEMG81UpZSzZmUn1  
rKWEyKs0VH6yFvH0ypMlKpUWQ5Gt7c3vj/u5n/O5f9xzzzmfu8k3zPHQEhKJ  
VCSo/3fT6X8/MyRjIhFyvuR33wpIxlvaj4xhykHbdZHSMoCJzoUliuZE5SM  
our7wvp2YPuPWX6WnaVEV/ZOlXBd0TNm5HyW+YMywg9UbZU5iNTa9pq1QUvg  
7qWljCwfVEdeKf/KimKsP/ndmLc/5r60U+OYq6Ah6nPUM/g10g7w3lzKXo0L  
jzVnraqCUciTKBcPkoJKo3Z1eFsobsj5h0RYrIOYSblkFS8MzbE87eey0mD/  
Y/ixuyUcz55LTFomZHAhJV/X/SID74z8b5e1y+Hq4P7UQv8IiC9KmB11KiC2  
kR7N6ozERjd/0qCtEipHW1UXgo9CZnjoZVG2MrQGGl8JCUVBOY29x/n4JgT3  
NWt5p0ZB3UzvsIjQZkh7fpvtFWdCb2JItMfIC6ocfsSIjBh8if7MN1CBeR5  
A1bpZyZsfwXpPpNVhZFM51RwXTRcq9hpScLbUPg68Wm5ZAY8DupNmkxtg/9m  
vUimTwwOrxq2nxxUg57WqabdVTFg3GPXlrSrY9XErkHWdAxYoXrrXP/SgFMT  
LydePxYJCsNRYws1QfKpPnYjPBZ5x/SMwplaWGjsoYwNxxqJAa/j8Ft8d8G84  
cD5enIWyYfb3PlttKNTW+B4js9BvKafdulEHErXu8fLeLAwV8EcKsnVQyvRw  
yj3Dwuhsc2bMMI38ut/ktfkqC29o+RaOx3VBmilpnm9ngf9zT6llkB46lOQt  
TUkEvrjKOY+M6OGQjboNSY7A3HW+MM9Ijxy6eorqtQl8F225ld25E7Hn19Zm  
UAmQvPIDQiz08dTKbkxfgLCdXQZyZp9LKhPGkgclbBcktqhpLULcstTKTMx  
BCQC5WIXSnZBQ5nOobMJSDXy1f+RNcCl7w9MOLkEpGVaBirTDSCa4SqWUERg  
Q1h+aqIwGVb585x9FQSU2+mm3iwy7EqbOUK3CKgoUSeMpsiU9bbUH+PgFq0  
XMHaAENYXxHhs1sJaPXwaRODhpB5dMA3touA3raWX200Rqhrk+cWPCFgcCK/  
pqjdCLZEyHmRfgLG/9J9WGbG8FSS6W0YIkDRpko5/2UMHVtl+uNRAIS2XLOW  
ugly7U4vtRwjsHeEHylWaAKbsSx1nXcEbMgtKi/XmeK9Ru1w3nsCDhn5z+pT  
TFFYEuUc/5GA6zt6Yi7JDIqF5lrznwi4UahkOtMMA1NfAkX4BHawNqp0Z82Q  
VNcfzRPgJT2rRb5GmeNn18M2oUkCfdJzwXe+CrD5AuutYF7hOfyEiKIglkqX

DxPg+LJmI8pXCtLT0kpKJghozDnbnzQG5KTqT7AF+9Zt6FjqxwJuGprXbBHw  
+WluUketB3QGParjBHzHfa8HqS4CJuuti7mCe54kblJcZmwBI3dR/dg3B05e  
y+19H2sBMcObPVtfE7jSLXamk2eBLcval4sF+mR/YRIWLvjgkXvh28lhAnHS  
/I/pRruxLVQ5Z90gAXvPp46OvN1It7YiTzwV6H3KSIR/YTd28udelPUK/Cyr  
56032gOFPO/tu7sJLEwUKT+/swdSkw+mVdsJlBwL5XvdoaJrzNxhtI7AzEXR  
INA6S4iXTfv7cQi8+F+smd2cJV6uUq75mUWgY+zTlA7ZCiFPsoLz0gi8uf2f  
/TO3rbDWwVC76jQBy7uFW4nbe1G8GNmUF0Hg3KBhU9KtfSief/bwmi0BE/ng  
+dK/aOhWuTdTuoRAy6uoKetJGqrPeb2k/GTBpij+fLDDucqX7wcXGDB05TT  
b1Jih+06Hb+v+8yCRbX30JG99qi8Xv6MPcKcf2/qXSGyA3ysZpzi77Jwbf2r  
ON11TqB03Y/oY7JgUJD+I7PbFb8aYwyYE7FIbMjoe6HgiQdbhMdXjcfgwwe7  
ZWMifrh5r1IvOT8aixZP+Bt5ASAZtx3uHGMIrWboTGIDEozHVBdXjEdh1zQv  
iVFBx/qSloGTi0dxaGXyhyZNBqY0068tVT2K8Bfz4wz1SOj+2LVF2joSYc+2  
rqSKRKHbLUTWLyECcT2mb3j/MuF2ZGfknocMPEzicvp6Y5BwsKkyR4yBFYHV  
IeuvsfDCI6nf2i0ccqLiG76Vx+FT6WcDhk0Y5C/bnzhddBzd+urKcwuhon1S  
Fz5nHA81j9AAvc4QVM916TcZnoR1a6aZbWYwUrq6o79tPYXHGbmKycwgiJz8  
orp8WwI+uGwkxh2OQIwsfuPwltOwaWorHzc/jIQTp2yfS5zBwgej0dd7A1F4  
ZYOrgkQiRCM1ptSsA7DLdy0j4nsi1F0msmn+h+CoSAqUe8tGdXRQ8dBZf0jW  
SzzMeZ2E467fe29V+sFynDBT+jsZHaaX324b84XC7ArF43+nIKxpb3PXWl8Q  
IhnPd3SllvVyD+ObnQ+crjCuTN0+i+u/50X/XeSNTjXmyzO30rAii1/q+swL  
902fa20vTYdY/qm37hmeIDvquqiczUDJePHFKI+DuFrqMhNNzYR9xbzQSgUP  
RLyzsAqoz0RyKtT3/nLDyg0Ue3PjLDgUVGbb9B3Aa27wq4IbWSBtNaWf7voD  
x/OkfK+qZmPpH2tm7Z/sx/tTj7gXLmcjXrXNWIKQoyzeDVeZjTlYmZXapvPG  
BctHyzvJLuagvzhwj/20s+CfbdyRKp8Lcb+iA6TVzrgbfV9uc2YuPgoJp5VR

nSD8B6OhRDIP/lS7a80Zjkg+6fS2ljEP3EtctdU3HfBEs+bnwW95uD7q9uOr  
kAM+tio8XojlIOv80NJSQe4tyutVFKc4kKtqSr3ymx3uFIpVan3hwN9dQu0H  
xQ46HOedZjMcyL5Q7nQytoNiAt/CY54DR+dBFWFtOyx6bPY6T+KitvLkJoas  
HWpXp+RLr+FiwZEhHfeRBpWYAxKSelwEXmq77JxNwwV6WZ6iPheWfXWNj87S  
IHVoeuMOAy6exqQPWLBPIDmmodoac8FeqiO1M46GYc2mvam7uSD1K53eFEAD  
Z0QtQcyJC5XmDOsdXjSs6otaIePCxWxyt/tNfRpOdz3IUt3PxfmMJSEm2jRE  
8DyKfnPnYnhf+hkbFRpoOZn3Evy4qNFYc44lQUNr8jA15xAX4e4DucuW02Aa  
r9FVEsjFSLtqOncpDRqhLQNNwVxsD+dE3Zm3RbHfGt/eUC5Mjb399k3bQtbN  
8/1oGBfeHos2wx02yLSvCJ9icHFdwVCPMW4LMav5uV+RXFBbP0mJvrbFf5wx  
j/4=

"]]},

{RGBColor[0.560181, 0.691569, 0.194885], AbsoluteThickness[1.6], Opacity[1.],  
LineBox[CompressedData["

1:eJwVz3k81AkDBvDJ5r5HGcTYbVtCjhDr/D1qOvi8jiSL1bEiLUoUahlkcg9m  
zPzm5+2gyJWSY1vNTKtXW+nw0hJWkQ46JMmdotf7x/N5Pt//nue7kGjFMBka  
jRa2lP+382Tvxxh1GkH7j03gPptXLoMFw3Wj8QNER90loxJaKZFy1+DIpfj3  
RPq47Yi+sIXIDB3a8lFnhpigFdXKb+8iOoYc/LjxC0T4eKdb051nRG5Da51W  
hAzm01Niv+K3xJXYWPvnOnK4ufWxg6XCBNFlbdBc26oIvS5D2tevs8TsRCsr  
KV4VL65NMddVLxJ5geLhC4UaaFPg3Cj5LIMSsVq1cgQdbPreUY8PcvjruNiy  
T0cbaznsLlalOrr71CaJcQYaa++ofrCi47VD6B8VrbrwKk+63H5xBZTn1VyO  
xhtgv/2TFdtHdaEfFEp74mkljQtn73rV6YMx0P/8XOG3YOcpfeJnG8LExbpc  
Pm119KR7g2clq+G50G/WrWME1d6cvn8UTEcYrR00x5tDImVFb9plg2LzgVPf  
h1igXYv100U3W1QMZH7p8bSEvsG6uTLjDegvHhssLrSCqEfa8+sHcYWN5XJ

Rljm6LtscEVjqDfGDPp0rGDmo9r5MqVbggiWPaH4l1QUaXtGCjdBotM0+L1  
My5oGAtgU3CHTIeG7HScK5iJBox/brujZvdAZ2IcgdnmOEnAQw8sujo1sSRA  
yvQvHqbd/4LP7ke+vuKNcLlzRnKGD6bOyOUcbNqC2v3MTTZVfnDSi5wra/TC  
ZieVFeptwbArzl/gtftjz6Onera3wpAhLeh5arAby4gomf7GKIyMeCsMye7D  
gNK0lDMdg3m3zjF98X6QGr2DQ5ZxyGH0p5dJI3DqhfekV84xbJgUZ8XUHMLw  
YiRbuT4RYSrZly1mMTgwv0UqSUvG4adzb2JMjuDXs5W9mddSEd39gwpLNg4y  
yTd3QSENSR3Ow+LeeDi88i31YXFwL4sS9fx9DNv8+E0/5p2EUviVqJUXf8NM  
EezZjenIXa686nN1ElRDH19mDWdAr9wn5eS5ZISbWAmqlmfB66rJ8iLHVfG0  
30qUyGbjmybbcuPJ6Db4Dypo5mDnLb2hM8/pOHRu40Mf1ouZE9MGckac7Bs  
xXcr2+ZyIW+vXH/g+5Oo73iy1+MFF5yUNM8+tXS01S2EmzfmOaRyIb+BWgai  
SvsCvLn52BCiFRP7JQPz2p9sS7wK4Mukheu+ykTxN65Bd2R4UJeo3R08zMLL  
bVo7P/zCw5Y3iS6GD7PxW9L7Zq0mHgxmlJjD5d2Va1VyVLn1G2oM+iLRcs  
5+ya6hA+dITGVI7/wQXcNdTIL/PxYG388/Sreed4TV0Pmuej2bnPff1ZPnjC  
gCluUQh73/U713ALcCir4kJ9aiGqynZOJbB4kDKiK5JvFSL2tdvW/ZKIXUp6  
LsbLBFBRfi40vLROhESvh4CvKQiXxTX8/GrxmGdM8cESCbpIVVGhajtuGR4  
7bIAb9PuU6fLCzF4VLFwZkgAvrjen6EvQLo5vTVUWwjFZ9UPks4IMPeX5vHr  
7kKwMvUtcvWEcL+QcPXLcSGuJzTrruYjCU9yatCoXIjLATHSUnUS3d3cZrlo  
IbJP7HhVk0Ei2/7dtMW8EJ1mdYu7PpOoo19ftWBI4t1tg/9+Oi7CSMCBhh1b  
SbhVS9Ywx0Vg+71/nB5B4lqJ/CXzCRECN3jdN4wkYSXys3GZEsEr5cFZ8ZKZ  
nDG34DkRujdzfhyNIjEfvHrPKRqFHJaxh280iQaNnH9ra1JwaLe7xzhKYs2x  
QDV1awpD3i3MfDaJ04cqSKYtBZpx00k1ySToYZP6FnYUpJpXvkiWTPPNM/N0  
pLCHcf7g6xQSA2Yt23I3UuAVrVck0kiIBtdy5HdQgH6I2duln6o9cUqMnRRu  
jNjn2JkkTrbd5Bv9RMGwoqOcnkUiVhx8bvPPFHrupv7ule3CS8D7k70Pwqdw

```
zwJuLonb2QMsQRgF54Y3ad9ySTinmraVhlNIMG36+fclmx689bglkoLvedqf
T/JInN+nGfL3QQpWzPTN0fkkdIJ2v30WTYFz27tRpoAEz6fm8HgMhQP+YXKi
JctvnZv9eoTCYsF9VxMeif8B0pPjrA==
"]]]],
AspectRatio->0.6180339887498948,
Axes->{True, True},
AxesLabel->{None, None},
AxesOrigin->{0, 0},
DisplayFunction->Identity,
Frame->{{False, False}, {False, False}},
FrameLabel->{{None, None}, {None, None}},
FrameTicks->{{Automatic, Automatic}, {Automatic, Automatic}},
GridLines->{None, None},
GridLinesStyle->Directive[GrayLevel[0.5, 0.4]],
Method->{},
PlotRange->{{0, 1500.0377}, {0, 1541.014041}},
PlotRangeClipping->True,
PlotRangePadding->{{Scaled[0.02], Scaled[0.02]}, {Scaled[0.02], Scaled[0.05]}},
Ticks->{Automatic, Automatic}] \) \!\(\*
GraphicsBox[{{},
{RGBColor[0.368417, 0.506779, 0.709798], PointSize[0.6], AbsoluteThickness[1.6],
EdgeForm[{{GrayLevel[0], Opacity[0.3]}]},
{RGBColor[0.368417, 0.506779, 0.709798], PointSize[0.6], AbsoluteThickness[1.6],
EdgeForm[{{GrayLevel[0], Opacity[0.3]}]}, PointBox[NCache[{{Scaled[{{Rational[1, 2],
Rational[1, 2]}]}, {Scaled[{{0.5, 0.5}}]}]}]}],
```

AspectRatio->Full,

BaselinePosition->(Scaled[0.1] -> Baseline),

ImagePadding->Automatic,

ImageSize->{10, 10},

PlotRangePadding->None] \)      blood

!\(\(\*

GraphicsBox[{{},

{RGBColor[0.880722, 0.611041, 0.142051], PointSize[0.6], AbsoluteThickness[1.6],  
EdgeForm[{{GrayLevel[0], Opacity[0.3]}]},

{RGBColor[0.880722, 0.611041, 0.142051], PointSize[0.6], AbsoluteThickness[1.6],  
EdgeForm[{{GrayLevel[0], Opacity[0.3]}]}, PointBox[NCache[{{Scaled[{{Rational[1, 2],  
Rational[1, 2]}]}, {Scaled[{{0.5, 0.5}}]}]}]}],

AspectRatio->Full,

BaselinePosition->(Scaled[0.1] -> Baseline),

ImagePadding->Automatic,

ImageSize->{10, 10},

PlotRangePadding->None] \)      liver

!\(\(\*

GraphicsBox[{{},

{RGBColor[0.560181, 0.691569, 0.194885], PointSize[0.6], AbsoluteThickness[1.6],  
EdgeForm[{{GrayLevel[0], Opacity[0.3]}]},

{RGBColor[0.560181, 0.691569, 0.194885], PointSize[0.6], AbsoluteThickness[1.6],  
EdgeForm[{{GrayLevel[0], Opacity[0.3]}]}, PointBox[NCache[{{Scaled[{{Rational[1, 2],  
Rational[1, 2]}]}, {Scaled[{{0.5, 0.5}}]}]}]}],

AspectRatio->Full,

BaselinePosition->(Scaled[0.1] -> Baseline),

```
ImagePadding->Automatic,  
ImageSize->{10, 10},  
PlotRangePadding->None]\)      gi
```

```
(*-----  
-----  
-----next mouse*)
```

```
vn=readTac["C:\\Users\\exx\\Downloads\\TimeM1, Liver 2.219375, GI 0.481875,  
ID 3219.csv"];
```

```
Lv=2.219375;
```

```
Gv=0.481875;
```

```
id=3219;
```

```
vn[[1]][[1]]
```

```
{{10,147.906},{30,1003.03},{50,316.352},{70,181.361},{90,138.862},{110,121.613},  
{130,109.758},{150,103.479},{170,96.3085},{190,89.8413},{210,88.4077},{230,86.1  
808},{250,84.8009},{270,83.3518},{290,80.4168},{330,76.4302},{390,74.2059},{45  
0,70.4475},{510,67.909},{570,68.4459},{750,64.8075},{1200,61.4002},{1650.03,59.  
3954}}
```

```
model= mouseModel[Lv,Gv,id,26]
```

```
ParametricFunction[!\(\
```

```
GraphicsBox[RasterBox[{{179, 179, 179, 179, 179, 179, 179, 179, 179, 179,  
179}, {179, 180, 180, 180, 179, 179, 179, 179, 179, 179, 179}, {179, 179, 180,
```

179, 179, 248, 248, 178, 179, 179, 179, 179}, {179, 179, 180, 179, 179, 253, 248,  
179, 179, 179, 179, 179}, {179, 179, 179, 179, 179, 248, 248, 179, 179, 179, 179,  
179}, {179, 179, 248, 248, 248, 248, 248, 248, 248, 179, 179}, {179, 179, 248,  
248, 248, 248, 248, 248, 248, 179, 179}, {179, 179, 179, 179, 179, 248, 248,  
179, 179, 179, 179, 179}, {179, 180, 179, 179, 179, 252, 248, 179, 178, 179, 180,  
179}, {179, 180, 180, 179, 179, 248, 248, 179, 180, 180, 180, 179}, {179, 179, 179,  
179, 179, 179, 179, 179, 179, 179, 179}, {179, 179, 179, 179, 179, 179, 179,  
179, 179, 179, 179, 179}, {{0, 0}, {12, 12}}, {0, 255},

ColorFunction->GrayLevel],

BaselinePosition->Bottom,

ImageSize->{12, 12},

PlotRange->{{0, 12}, {0, 12}}] \) \(\(\*

GraphicsBox[{{}, {}],

{GrayLevel[0.55], AbsoluteThickness[1.5], Opacity[1.],  
LineBox[{{9.09090909090909\*^-8, 9.090909090884856\*^-8},  
{0.0874367476365131, 0.08197166587636243}, {0.18222810297558026`,  
0.1358255024317191}, {0.27073779576926765`, 0.13315455086535802`},  
{0.3575112797365835, 0.08143316377978886}, {0.4516394623155443, -  
0.007347854733426912}, {0.5394859823491253, -0.08816932746972758},  
{0.6346872009943513, -0.13787329990112937`}, {0.7281522108132057, -  
0.12816574147938434`}, {0.8153355580866803, -0.07001063326902106},  
{0.9098736039718, 0.02121659675083076}, {0.9999999090909091,  
0.10024804094746914`}}}],

{GrayLevel[0.55], AbsoluteThickness[1.5], Opacity[1.],  
LineBox[{{9.09090909090909\*^-8, 9.090909090880112\*^-8},  
{0.0874367476365131, 0.08090369567458766}, {0.18222810297558026`,  
0.12746559200130417`}, {0.27073779576926765`, 0.1116266937044405},  
{0.3575112797365835, 0.046963725126600256`}, {0.4516394623155443, -  
0.04509050859182233}, {0.5394859823491253, -0.11115559892361665`},  
{0.6346872009943513, -0.12642564594664163`}, {0.7281522108132057, -  
0.07740196037964171}, {0.8153355580866803, 0.004179083230780074},  
{0.9098736039718, 0.08937493944143977}, {0.9999999090909091,  
0.12834702174618903`}}}],

{GrayLevel[0.55], AbsoluteThickness[1.5], Opacity[1.],  
LineBox[{{9.09090909090909\*^-8, 9.090909090875369\*^-8},  
{0.0874367476365131, 0.07984396759533968}, {0.18222810297558026`,  
0.11939549826670079`}, {0.27073779576926765`, 0.09184904274707059},  
{0.3575112797365835, 0.017913117173780694`}, {0.4516394623155443, -



{0.07109962300031061}, {0.5394859823491253, -0.11717052830989395`},  
{0.6346872009943513, -0.09879571259704382}, {0.7281522108132057, -  
0.022693471356141894`}, {0.8153355580866803, 0.06128703302641453},  
{0.9098736039718, 0.11605625481609519`}, {0.9999999090909091,  
0.10415981267620744`}}},

{GrayLevel[0.55], AbsoluteThickness[1.5], Opacity[1.],  
LineBox[{{9.09090909090909\*^-8, 9.090909090870287\*^-8},  
{0.0874367476365131, 0.07879243663407876}, {0.18222810297558026`,  
0.1116081822210312}, {0.27073779576926765`}, {0.07372482040530459},  
{0.3575112797365835, -0.006267252216927747}, {0.4516394623155443, -  
0.08743897872291118}, {0.5394859823491253, -0.11109134853087661`},  
{0.6346872009943513, -0.06371549528296311}, {0.7281522108132057,  
0.02544576624054603}, {0.8153355580866803, 0.09464282937855747},  
{0.9098736039718, 0.10731931496853601`}, {0.9999999090909091,  
0.0516787429232188}}},

{GrayLevel[0.55], AbsoluteThickness[1.5], Opacity[1.],  
LineBox[{{9.09090909090909\*^-8, 9.090909090865543\*^-8},  
{0.0874367476365131, 0.07774905743802465}, {0.18222810297558026`,  
0.10409673959866513`}, {0.27073779576926765`}, {0.05716133039337165},  
{0.3575112797365835, -0.026084496726167965`}, {0.4516394623155443, -  
0.09591154799603378}, {0.5394859823491253, -0.09685594593277226},  
{0.6346872009943513, -0.02730376120671303}, {0.7281522108132057,  
0.061646715198529656`}, {0.8153355580866803, 0.1046634148537508},  
{0.9098736039718, 0.07509702498429204}, {0.9999999090909091, -  
0.006536873471333553}}},

{GrayLevel[0.55], AbsoluteThickness[1.5], Opacity[1.],  
LineBox[{{9.09090909090909\*^-8, 9.0909090908608\*^-8},  
{0.0874367476365131, 0.07671378556951527}, {0.18222810297558026`,  
0.09685439581479163}, {0.27073779576926765`}, {0.042069810325321415`},  
{0.3575112797365835, -0.042006785469922474`}, {0.4516394623155443, -  
0.09808544986431629}, {0.5394859823491253, -0.07760167026270944},  
{0.6346872009943513, 0.0063643674428021085`}, {0.7281522108132057,  
0.08405712128907425}, {0.8153355580866803, 0.09555213349985489},  
{0.9098736039718, 0.03202960165577907}, {0.9999999090909091, -  
0.054402034659985464`}}},

AspectRatio->1,

Axes->{False, False},

AxesLabel->{None, None},

AxesOrigin->{0, 0},

```

Background->GrayLevel[0.93],
BaseStyle->{FontFamily -> "Arial"},
DisplayFunction->Identity,
Frame->{{True, True}, {True, True}},
FrameLabel->{{None, None}, {None, None}},
FrameStyle->Directive[Thickness[Tiny], GrayLevel[0.7]],
FrameTicks->{{None, None}, {None, None}},
GridLines->{None, None},
GridLinesStyle->Directive[GrayLevel[0.5, 0.4]],
ImageSize->{Automatic, 28.4375},
LabelStyle->{FontFamily -> "Arial"},
Method->{"ScalingFunctions" -> None},
PlotRange->{All, All},
PlotRangeClipping->True,
PlotRangePadding->{Automatic, Automatic},
Ticks->{Automatic, Automatic}] \) Expression: {Bl,Li,G}
Parameters: {k1,k2,k3,k4,k5,k6}

```

]

```

Manipulate[Show[ListPlot[vn[[1]],PlotRange-> Full,PlotLegends-
->{"blood","liver","gi"}],Plot[Through[model[k1,k2,k3,k4,k5,k6][t]],{t,0,1500},PlotRa
nge-> Full,PlotLegends-

```

```
>{"Blood","Liver","Gi"}],{k1,0.001`0.2`},{k2,0.0001`0.1`},{k3,1.`*^-6,0.01`},{k4,0.001`0.2`},{k5,0.01`0.03`},{k6,0.0001,0.01}]
```

```
Manipulate[Show[ListPlot[vn[[1]], PlotRange -> Full,
```

```
PlotLegends -> {"blood", "liver", "gi"}],
```

```
Plot[Through[model[k1, k2, k3, k4, k5, k6][t]], {t, 0, 1500},
```

```
PlotRange -> Full, PlotLegends -> {"Blood", "Liver", "Gi"}]],
```

```
{{k1, 0.043800000000000006}, 0.001, 0.2}, {k2, 0.0001, 0.1},
```

```
{{k3, 0.0020800000000000003}, 1.*^-6, 0.01}, {{k4, 0.0026}, 0.001, 0.2},
```

```
{k5, 0.01, 0.03}, {k6, 0.0001, 0.01}]
```

```
Part::partd: Part specification vn[[1]] is longer than depth of object. >>
```

```
ListPlot::lpn: vn[[1]] is not a list of numbers or pairs of numbers. >>
```

```
ListPlot::lpn: vn[[1]] is not a list of numbers or pairs of numbers. >>
```

```
ListPlot::lpn: vn[[1]] is not a list of numbers or pairs of numbers. >>
```

```
General::stop: Further output of ListPlot::lpn will be suppressed during this calculation. >>
```

```
Show::gcomb: Could not combine the graphics objects in
```

```
Show[ListPlot[vn[[1]],PlotRange->Full,PlotLegends->{blood,liver,gi}],\!\(\*
```

```
GraphicsBox[{}],
```

```
AspectRatio->0.6180339887498948,
```

```
Axes->{True, True},
```

```
AxesLabel->{None, None},
```

```
AxesOrigin->{0, 0},
```

```
DisplayFunction->Identity,
```

```
Frame->{{False, False}, {False, False}},
```

```
FrameLabel->{{None, None}, {None, None}},
```

```

FrameTicks->{{Automatic, Automatic}, {Automatic, Automatic}},
GridLines->{None, None},
GridLinesStyle->Directive[GrayLevel[0.5, 0.4]],
Method->{"DefaultBoundaryStyle" -> Automatic, "ScalingFunctions" -> None},
PlotRange->{{0, 1500}, {0., 0.}},
PlotRangeClipping->True,
PlotRangePadding->{{Scaled[0.02], Scaled[0.02]}, {Scaled[0.05], Scaled[0.05]}},
Ticks->{Automatic, Automatic}\]. >>

ParametricNDSolveValue::fpct: Too many parameters in {k1,k2,k3,k4,k5,k6,k6} to
be filled from {0.0438,0.0001,0.00208,0.0026,0.01,0.0001}. >>

ParametricNDSolveValue::fpct: Too many parameters in {k1,k2,k3,k4,k5,k6,k6} to
be filled from
{0.0438[0.0306429],0.0001[0.0306429],0.00208[0.0306429],0.0026[0.0306429],0.
01[0.0306429],0.0001[0.0306429]}. >>

ParametricNDSolveValue::fpct: Too many parameters in {k1,k2,k3,k4,k5,k6,k6} to
be filled from {0.0438,0.0001,0.00208,0.0026,0.01,0.0001}. >>

General::stop: Further output of ParametricNDSolveValue::fpct will be suppressed
during this calculation. >>

ParametricNDSolveValue::fpct: Too many parameters in {k1,k2,k3,k4,k5,k6,k6} to
be filled from {0.0438,0.0001,0.00208,0.0026,0.01,0.0001}. >>

ParametricNDSolveValue::fpct: Too many parameters in {k1,k2,k3,k4,k5,k6,k6} to
be filled from
{0.0438[0.0306429],0.0001[0.0306429],0.00208[0.0306429],0.0026[0.0306429],0.
01[0.0306429],0.0001[0.0306429]}. >>

ParametricNDSolveValue::fpct: Too many parameters in {k1,k2,k3,k4,k5,k6,k6} to
be filled from {0.0438,0.0001,0.00208,0.0026,0.01,0.0001}. >>

General::stop: Further output of ParametricNDSolveValue::fpct will be suppressed
during this calculation. >>

Part::partd: Part specification vn[[1]] is longer than depth of object. >>

```

ListPlot::lpn: vn[[1]] is not a list of numbers or pairs of numbers. >>

ListPlot::lpn: vn[[1]] is not a list of numbers or pairs of numbers. >>

ListPlot::lpn: vn[[1]] is not a list of numbers or pairs of numbers. >>

General::stop: Further output of ListPlot::lpn will be suppressed during this calculation. >>

Show::gcomb: Could not combine the graphics objects in  
Show[ListPlot[vn[[1]],PlotRange->Full,PlotLegends->{blood,liver,gi}],\!\(\^\*

GraphicsBox[{},

AspectRatio->0.6180339887498948,

Axes->{True, True},

AxesLabel->{None, None},

AxesOrigin->{0, 0},

DisplayFunction->Identity,

Frame->{{False, False}, {False, False}},

FrameLabel->{{None, None}, {None, None}},

FrameTicks->{{Automatic, Automatic}, {Automatic, Automatic}},

GridLines->{None, None},

GridLinesStyle->Directive[GrayLevel[0.5, 0.4]],

Method->{"DefaultBoundaryStyle" -> Automatic, "ScalingFunctions" -> None},

PlotRange->{{0, 1500}, {0., 0.}},

PlotRangeClipping->True,

PlotRangePadding->{{Scaled[0.02], Scaled[0.02]}, {Scaled[0.05], Scaled[0.05]}},

Ticks->{Automatic, Automatic}\)]. >>

Part::partd: Part specification vn[[1]] is longer than depth of object. >>

ListPlot::lpn: vn[[1]] is not a list of numbers or pairs of numbers. >>

ListPlot::lpn: vn[[1]] is not a list of numbers or pairs of numbers. >>

ListPlot::lpn: vn[[1]] is not a list of numbers or pairs of numbers. >>

General::stop: Further output of ListPlot::lpn will be suppressed during this calculation. >>

Show::gcomb: Could not combine the graphics objects in  
Show[ListPlot[vn[[1]],PlotRange->Full,PlotLegends->{blood,liver,gi}],\!\(\^\*

GraphicsBox[{},

AspectRatio->0.6180339887498948,

Axes->{True, True},

AxesLabel->{None, None},

AxesOrigin->{0, 0},

DisplayFunction->Identity,

Frame->{{False, False}, {False, False}},

FrameLabel->{{None, None}, {None, None}},

FrameTicks->{{Automatic, Automatic}, {Automatic, Automatic}},

GridLines->{None, None},

GridLinesStyle->Directive[GrayLevel[0.5, 0.4]],

Method->{"DefaultBoundaryStyle" -> Automatic, "ScalingFunctions" -> None},

PlotRange->{{0, 1500}, {0., 0.}},

PlotRangeClipping->True,

PlotRangePadding->{{Scaled[0.02], Scaled[0.02]}, {Scaled[0.05], Scaled[0.05]}},

Ticks->{Automatic, Automatic}\)]. >>

Part::partd: Part specification vn[[1]] is longer than depth of object. >>

ListPlot::lpn: vn[[1]] is not a list of numbers or pairs of numbers. >>

ListPlot::lpn: vn[[1]] is not a list of numbers or pairs of numbers. >>

ListPlot::lpn: vn[[1]] is not a list of numbers or pairs of numbers. >>

General::stop: Further output of ListPlot::lpn will be suppressed during this calculation. >>

Show::gcomb: Could not combine the graphics objects in  
Show[ListPlot[vn[[1]],PlotRange->Full,PlotLegends->{blood,liver,gi}],\!\(\^\*

GraphicsBox[{},

AspectRatio->0.6180339887498948,

Axes->{True, True},

AxesLabel->{None, None},

AxesOrigin->{0, 0},

DisplayFunction->Identity,

Frame->{{False, False}, {False, False}},

FrameLabel->{{None, None}, {None, None}},

FrameTicks->{{Automatic, Automatic}, {Automatic, Automatic}},

GridLines->{None, None},

GridLinesStyle->Directive[GrayLevel[0.5, 0.4]],

Method->{"DefaultBoundaryStyle" -> Automatic, "ScalingFunctions" -> None},

PlotRange->{{0, 1500}, {0., 0.}},

PlotRangeClipping->True,

PlotRangePadding->{{Scaled[0.02], Scaled[0.02]}, {Scaled[0.05], Scaled[0.05]}},

Ticks->{Automatic, Automatic}\)]. >>

Clear[newmodel,fit2]

```
newmodel[k1_,k2_,k3_,k4_,k5_,k6_][i_,t_]:=Through[model[k1,k2,k3,k4,k5,k6][t],List][[i]] /;And@@NumericQ/@{k1,k2,k3,k4,k5,k6,i,t};
```

```
Clear[k6]
```

```
fit2=
```

```
NonlinearModelFit[vn[[2]],{newmodel[k1,k2,k3,k4,k5,k6][i,t],{k1>=0},{k2>=0},{k3>=0},{k4>=0},{k5>=0},{k6>=0}},{k1,0.0438},{k2,0.002},{k3,0.00254},{k4,0.001},{k5,0.01},{k6,0}},{i,t}]
```

NonlinearModelFit::eit: The algorithm does not converge to the tolerance of  $4.806217383937354 \times 10^{-6}$  in 500 iterations. The best estimated solution, with feasibility residual, KKT residual, or complementary residual of  $\{5.57184 \times 10^{-12}, 0.00105676, 1.20585 \times 10^{-12}\}$ , is returned. >>

```
FittedModel[newmodel[0.0122713,5.86338*10^-13,<<22>>,<<23>>,0.00167535,5.86338*10^-13][i,t]]
```

```
{fit2["AdjustedRSquared"],fit2["AIC"]}
```

FittedModel::constr: The property values {AIC} assume an unconstrained model. The results for these properties may not be valid, particularly if the fitted parameters are near a constraint boundary. >>

```
{0.985899,910.765}
```

```
fit2["ParameterTable"]
```

FittedModel::constr: The property values {ParameterTable} assume an unconstrained model. The results for these properties may not be valid, particularly if the fitted parameters are near a constraint boundary. >>

|    | Estimate                  | Standard Error | t-Statistic                     | P-Value                   |
|----|---------------------------|----------------|---------------------------------|---------------------------|
| k1 | 0.0122713                 | 0.00160987     | 7.62257                         | $1.63242 \times 10^{-10}$ |
| k2 | $5.86338 \times 10^{-13}$ | 0.000841942    | $6.96411 \times 10^{-10}$       | 1                         |
| k3 | 0.00168407                | 0.000114766    | $14.6745.37102 \times 10^{-22}$ |                           |
| k4 | $5.86338 \times 10^{-13}$ | 0.000238756    | $2.45581 \times 10^{-9}$        | 1                         |
| k5 | 0.00167535                | 0.000761762    | 2.19931                         | 0.0315341                 |



k6 5.86338\*10^-13 0.0000819131 7.15805\*10^-9 1

```
Show[ListPlot[vn[[1]],PlotRange->Full,PlotLegends-  
>{"blood","liver","gi"}],Plot[{fit2[1,t],fit2[2,t],fit2[3,t]},{t,0,1501},PlotRange->Full]
```

]

\!\(\\*

GraphicsBox[{{}, {},

```
{RGBColor[0.368417, 0.506779, 0.709798], PointSize[0.016666666666666666`],  
AbsoluteThickness[1.6], PointBox[CompressedData["
```

1:eJxTTMoPSmViYGAQB2IQDQEqDoxJMbv/1SQ5QPh2DmdZDu90i+iH8j0dZDS3

3Z1/tBjCbwh0KEp8t6R/dRqUH+bAFxZ0d1J0IpQf7fBOQ5PbKj0OwndlcPie

1vW+qiAawj+Q5FAkaqC26F4kVD7VwfOZ+6a9whFQ+XQHnhet1tdLw6DyWQ6r

9k1IFJeC8g/kOGTk//g2sTsUKp/vUKDZkuhkDOU/KHBYx2wo1XwtBMJXKHKQ

n5VwdY0UIL+gxKF3M5d4p3QwhJ9Q4XBxf7+Bbm8QVH2NQ+Tsc+mL5wRCzat3

WFUSx6D7KwDCv9Do8JJ3a2mnDFS+oN1hSeJSh3XGUPkDkxx+zYw8b7nZz+Fc

x6V7CidmOgSu59gze5OvAwAB426G

"]}],

```
{RGBColor[0.880722, 0.611041, 0.142051], PointSize[0.016666666666666666`],  
AbsoluteThickness[1.6], PointBox[CompressedData["
```

1:eJxTTMoPSmViYGAQB2IQDQEqDhOS/Vxqd9o5QPh2DnF75LfXRxVA+Z40JocX

Cm3KaYDwGwIdnq43ZXgg0gblhzkY2U96K761A8qPdjDz3x8aIdEF4TskOFQV

rbB6fw7KP5Dk4NdmT/n9HZh8qsOvvJWW/nD5dIespQInRP1g8lkOp60unT/1

vxMqn+OgrREW7t8A5TvkOzy9c8dv41Wo/Q8KHKavaE68mgDIKxQ5LFrmo2B9

vx3CX1DisPic+d+Ub1D3J1Q4GKpOemFa3QpVX+MQc2fChE0eLVDz6h36PxYp

dTs1Q/gXGh18jJuMLrk1QfgF7Q6rU6ITv2bUQ903yeH4n0nOt1aWOZzruHRP

4cRMhwV3os3+Ty9wAADkQ3dR

"}],

{RGBColor[0.560181, 0.691569, 0.194885], PointSize[0.016666666666666666`], AbsoluteThickness[1.6], PointBox[CompressedData["

1:e]xTTMoPSmViYGAQB2IQDQEqDv]lEY6cgUoOEL6dwyzPrjpl1ww039NBoH3b

2u07CyD8hkAHxqdLA8UZCqH8MIdn9b6Gj5yLoPxoh5wL0+/tCy+F8B0SHNym

Jt55m1kD4R9IcmD48+ND4IsmqHyqwWtN8f0sBR1Q+XQHlxaG43XPe6HyWQ6P

1n7OD58+ESqf45CcIHv8vcMUqHy+w5OslHCt19Mg/AcFDv7Tot6HL5oJ4SsU

ObDxZby00jMbwl9Q4uC468YWI7sFEH5ChcPj34+CUrUWQ9XXOMSfv67Df2wp

1Lx6h63+x5PtufdA+BcaHd5tMVU6YLQKwi9od5jP+DXtiul6qPsmOWTrnnFa

vn+zw7mOS/cUTsx0SGqS2tdrtc0BAPc/dGw=

"}], {}, {}, {}, {},

{RGBColor[0.368417, 0.506779, 0.709798], AbsoluteThickness[1.6], Opacity[1.], LineBox[CompressedData["

1:e]wVV3c0198ftmVkrSrlir]CRon3fZEVQshKsknl]nvv8fH5+CBfaQiF7GQl

ys6KskjWVr]HKfXr98+95znPfa17zn30c/lS7hrYk5GQkj8W/6/K26PbHow

kqD24y4t6ezp8CX1a/mq7yRaU8yyLN4lQGgnt1ej73fEyZeyuP+RAP3zF42S

fA/RtfSjFILpBNjf6lAN8j0K98VEr3CxEYDugEH]25cbqJPK+mN58UAMlr7o

7isOA58+qIfcwEGu+GS2gi0ENPdmFFUADgomY38PXz0HaxJZu0xCOj]IXfuS

i5cEWZUiraezqbD253IepbM0NLpWXC9ITQWWN2tnhzjkYLZzzswyOhnMkaq8

m68SdL/wM8TnJYBEReiu1J4STAz0Tat6JwBZPxPlrg8G/LkF9tpqCVBsOTkY

6IOgh+k9q8FSPPzBLr1SrQcYYQ89LycdD/qWHw0M6lRAJUst5fPHWNjJoUpw

faUOK35dFXPXomGq+Z6S3r46fDyRd/GIWDR0zq9uSMprwLAKz6+7VNHwQGzI

ZKdGA/wxcmXqxihQb3x4OrBGE0hdi3c1RkIg6/OfIriXWiD3IYe9jCUSLp28  
8yOvShcoaR3FTjCFQ+usz8aVdV2w6Brl6t0OA53isKV1ET1wZOf+UzYSBpaK  
GaOXnujBX6zjBumjMFAus5q4rakP71o0Sbqlw8DuQ2Ijqfw1kFEjP27TEgJF  
bLNBUScmgBR42639VSCs3Vv0p5A2hLf/PRvqiw+E81Or3iN6hsC/2RQtYBEI  
jQX7LsGJhkDDFTIURhoIvfjHb3aRGYFYJe6Uun4AbJhdULLeNILVnar5gwN/  
kMtNOcT1GcP7MKO3dpG+UPxkS6bvmzH85W0a6bL0Bd5CYxc6GhN48LHZylnB  
F+jKeT5HXzYBCvKLchZbPjDdUlobUGsCrYLM6z/sfCDha5+X3RNT0JO48LjT  
yBumxBhX5H3NAU+sOTSw8ARDKS8+H4I5MJHnyfhjntApO2JaWW4Os8kXf/Xy  
ekIV9rBD7Js5WB17SkG74AFx+ufy+axuADfhTH6DpwdIe+tZ0WlZwHZXI9nb  
dHelaUgdnuk2BMLT8YUXW66w/ssvMEPJJe6Y4uy+vHYFU0UrXt2blhCLy2Fy  
i3cFkdeSzq9zLCGxofLaIz5X6G/6cPgf5y3QNN1Bo27sAvQz8fgSeiu45J/l  
QDPgDMbz7+tu01rDcSr+WVdSJ0iggCS1k9ZQku1vd2LEEd4IVlvyiVgDfaVI  
COMLRzhjn0M+dsUa1hd1osbMHOHXV5ermvHWYLR4UWakxgEeLR6dETpiAx7f  
Ly7RhdjDyorekXIKW/izhiehXGxBfWf5W/kxW2AId+s05bGFJ4eR/cEctrDk  
vvR6+o8N3GCqzTiubAvzEZYfE5ttoEeW97R2kC348XzlU103gdKwDeXKLVu4  
/WzB4Ke5NXiypwWGfbEDVblDrUzdW9B3SvTW1TU7mNMwMGP8N7fI2TaVvk4d2  
sOrzl31i0RLmLv2kqT5pDxkzjgEeEZZgZG2dtXjdHIRkEuuCG26CXInUS90e  
e+C15vtSpGgBB8qDa1x1DjD7bsJx0M8M9G9L0Ah30cDt7J8cjlpmUIBLEJAa  
cwDV+J1hHW4zMPyiYqr28x9uCVShaTWFkqCqFteLjjDammYsx2YKlq/S05vq  
HOH7BSe3r23G8FbMRMGq3glqP7fE/7AwAg6jKiPnbieQiInTfnbBCNwCGe96  
jztBfs3LrqxjRsDZ3ZEXd+AEPBZyrAq9huDteOFohcJtUC+S4PBQNgShJyem  
SRtuA9vUBIORrAEkHJ+lzmtwhtZfHltM/97hz5TF1zbnvYGFred9iqg+OFFt  
7/J9doaNOM5MjFEf1HZpHB4dOIPC4Lq5fakekAzJqz+4eAfWB5x+tw/qgk8K

gSrZ1R3oGRgqvyh+FawotWMTqlyg5oLBko+gFvQFGb+58s4FzljckCvfuwJK  
09b7R4ZcoFgm9JlC1xU4OefvGLvLAqqLii+U7l6BT80FGlFSrrCVWn1rtUkT  
tlLljoSUucLyFplAgIsGyG7XxXkUu4GiixDfzG9V6DH89oGv3g0MCo49zBxX  
BZtqLs7BTjcQhSSBmFpVSPEJfSG94AbR53500viowtK+6uA2713AXd69/WTj  
MmT/7uf0zbgLpH4Djt2bKkBC7mXyGtxhKTPQ6eEJZdCuogti03SHmTMha2WH  
ABm2Tx+56rnDHwEt7bUZALHWT8vclu7wXN5rZKsIwCz6QIBloDusOAbPsyCA  
Suo/j1CNO1wrXuv9PIWBPX38SouoB9yVoR/zmbwEpe8jimrPe0Bugscv8kl  
2EsIci675AEuZ9dFOQMvQqyN+0qOtgfozq+IcZ68BAVUJit+dzzgiNQvyRMW  
CrBEcnpFvNgDbmkjXU1dvwDOu83L90U8YVFX/DBEXw4qq+uf46Q9gX0nRPfg  
jBwceFXfjIXwBDox75IGUjli3Cpc9tbyBNz9ylyGalkoWU9Z1nP2BHt9q/5F  
Tln4vmyxTFnkCcEij/G/9s+D+9SPJY+zXnC/oY11a0oKdPDRUjOSXqDv/t6U  
rkUKzqizBOhf8IIJNQrnsjwpmH4hSndOwwwSKG8UxN2WAv1gS/FVOy+4MLCo  
57cvCZjcrR40j7zg2PA2AwWX5D+9Tj0wP+4Ng++TnfPpxKHnKNflbh5vmNyh  
oH/wWQyetTxLvCjkDVEc8cLzxWJgdfYtF4esN6y4R3ZbXhWDgR872CcDb6jX  
7Svfj4hCeaZ5pF7KP10mF4vUOCcCdz+dplel9IGY26krR/4TBloPhLlikeh84  
7fph7Z23MEDyWv0I6z+M96V8rSsMTGqvbt/h9wFR281OR3JhKK/W7MAjH1jR  
3VdOvysEW4Q7ETP3fEBXJ+3etsFp8Dwo+BGy5gNiG28eGl4WAMtStoHOXR/Q  
brz/gkNQANRpAwpZDn2gd7xTl4lSAI6/VTEuoPOFwlBgz+jgh1qpj1W9Z3zh  
YbCGxrYuP/xk2nfjsvUFbFP1YbkDHwT1K36tG/EFy7k3luB+CqwVyEYffPGF  
b0OwoL0Lp0A9v6M7YdEX4tV/cjOQnQLmQIPyG/u+IKY//cySyAMFQk6Bh+x+  
ELhzTMezmRv6gwnMysZ+wFFhGt0vzAX8YitKnR/94FBn251X/gRQZ5aVl0/4  
gdDPrc+dtCdglDRH4P68H7CNn5d8M8UBr0b+HnHe8YM2hnZdQiwH6ESyfaQ7  
5g9TI2i/e+I4+I6Ds56hP6RdftNDQ2SHrrjMjOEP/qDGyKRjdvEYqCytp8mP

+YO/dGSeMMcxaNTQTM6a9odOq/FQsX1WKKX6GWm+7g8kDVaOoy9ZAR9l7jFF  
fw8+OZMYlsmgkYt86Cxj24/p9sAT1i+ed78kj3Xt8Do8pvX8CXCWxHfv02  
brsHbEp5qoo3mGBCzujHq5578COen9IOmKBvl2L93ud74EFX4CxPxxSVXg4T  
hz/ugU6hPMV7NUYluHv2FaVMAJBdVY2+XH0UaB3LXNiKA7pxojWkx5aCPvk  
RM5WGQCBjm4v9nNoYe8yf/ax+gDgWd7oeOxKC7O8xA7W7n8+JEFzeZORFurH  
A/hZVgKgqVllydOUBpx11UcZRAJhrPrtGd8f1NAt03n5SFEg4KetT9e7UwI8  
zRinrgyE56d91zK1KKGGRd+Duj4Q9mQu3a8TpIQn629zqboDYZP+b2H7GAUE  
PH/2k2IIEIK4w+UP1CIAhNu7jFQkCG6u5ryxFCeHRAo6zl/Pg2Brv/CsqDAP  
MHDmwKeKIBA7SJORpyEFnJS4Q1ldEGhqZlb5fSOBdEu9CtuuIPBxko0klJNA  
Ti1Bo2fp33nDxLZzSiRQ6sLl/UA4GKosdp7fePMHDX4U70X5wcD9yiv3S8ov  
ZPStaeVei2Cwq0l3b7b8hYZJ9Tl2qoPhmi+v5a7EL/RZwtP2WWswqHZRKpgN  
HKD5uJqfTPPBMFw1UP+D/QDtKSKhWf4QCLQeozte9QOdzNcPjXoUAI78Twwzk  
BPaQZLm3+EhhCAgMjbEI/91F6g1Zn8+WhcCXPG1fg8+7yPPDtHz/6xDI4mdr  
MUnfRd2H7hsnPocAbuB3PgyNLgowTrMuYwuFj04jxb9+b6PP1IOXxxNC4YIT  
l4cE/RbaYtnbFMOHQkCpXFjn2iY6wnPyUej9UCjZ3g3Af9hEMjI2vwWfhULb  
Fy+Sl5mbKmlqq/puWyjokU4viAptolwLGgIZSRhcomY9fKC9gXRfnqXIUggD  
D2LdhqTrd2SqsvoMh4XBf+pDi/IXvyPr/tKr8SphwIjnmQm/I68l89nBmiF  
geDXdgGPh6somxsTuWkeBik6ojR6l9/QQRsBPn9AGGizkvdOmKygeOPAnJK6  
MGGoITWWSV9EcXNKyvmvw8DWM7ghxXkRpbmTLDxoCYM/WvhSaeVF9DQh+lxq  
Vxi4bpZqX19fQN1NqW89xsKglmSgbl93AbELP12S+xkGpOk4IVXOr6hsv0em  
5UI4TLHZN5bPzyKyv6PcvorhIE0TEhrfNouMqb5SiUI4ajVvPyMWzKLfxw5H  
0zXCgVPf9YP67VmkJS0e7GT8j782t0y2OYMWXJLbGL3DQf9VSMZ9mhnENXvV  
2LIsHJ62cA/cqJ9C7stmiLUqHFgY1tPKY6fQuw37M5014WDtot1hen0KOf8N

PpBqCgeZsdaYx5uTqJarNjeyNxyS+zPOUUIIkMThsWSIX/x9Nfil5+Rgk9  
fX6/TkcAtTSz8szvUWRxI7H079kISB2Jy8UGRpHEisZXcoklyAr83ftbxQN  
UrcY0MtFwPGdpqvndUbRyctV4tzqESB5gpzo+GgEPa/LnMMcluD01dDQZeNh  
1FlgpRdR8A8rfNN4/2MIZctyx8QURcBRPclink9DyKV1rDGhNALSMI6qiooh  
xDRrIEKoiQCbVq7x9DtDyIRbjfjP+79+QguXLs8OogXC2Ya2hQh4946Lf3n8  
A6IM3xKiEY6E/HPxdN9X+9HU3Mn8A5FIKGO2bl2r7kc16pcFViUiQQ3P3GEQ  
3I8c6NNP9ctFwkOr9EOMsR+1Z8pyENUjYaZX058o34diSv1p+Bwigf4miUD+  
/R5ENfHn24X8SNASOmdA+bALTWHCziLPI6FHUVCB3bML1TzWW+J8EQkmi37r  
PmpdyMHx0fyf6khwGLgbcOp7J2rfUp5sbY2EaakPV+igE8XQRPfpz0dC4vXf  
xz5ttyNqeboKJ4EoGH5zmPwhtRWdORbsxS4cBayZ1aMibq1Ia3NntvXfv5OF  
IVW4QacVpRQP1p+SjoK9yNOhobStij03u3UYomBX5PjH5Lh3Sljm7Kiq5T9e  
hYzaL+UtUvus/pf3fhR4rjCfPPemGTnU1rb05UQB0YqztD2vGcURRaKCHkVB  
jc+YYGjCm+rRY6AZLYwC8U+mOfcNmpFR6yeW1JookHpq2BL/4Q2ye2EndDgU  
BRsnwq6JKTShyNCIq2MM0fDfWIFZuEYDEpx/enOYJRpWp4YGul83oFbNDtch  
9mg4rUk2y7hYjyhY6FN6eaKBq5rbZTu2HsU8Jfa1SETDQwUWtcLeOpTQ9Uyv  
SDcaKl8KOys61aI01v5rgSnR0KXrsWI5/BJJ+29a++Ojwd008tGTspdocILV  
OycjGoq56EhE418ilgJT/N3caNgmPVNBrfQSpV+YHbQtjQaTXvuQucJqlHVz  
11CnLxriXCJa38VXoYeFnMbcDDHw48WK3unACpQQE1s0zBwD9+b+4M5ZViBv  
++0/qWwxQEv/tf02cgXSFHhfSMYdAy4nrddcjlSgrdyAn4uiMSBy+0VnflY5  
Us0Yy6m8EgN+buF/sMgytBKVOacRHQPsZPJ8+o4l6Kmt+QXS+Bi45Ke/o3yh  
BL1RuZtUnxQDmbnPB8NpSlA6iYaseHoMzPRdrFsuKUZKQXsxLHkxkAvPHXT2  
ixDO67rIZHMM9DeH0azff45kbVg9PH/HAD1bpp0uayESYvtGf4IkFpKMS4ID  
3wsQe+fbZ2/IY4GOZaWB2FmA9sQ9p+npYkHmHqdtf0gBqv05oFd4IhY4s4ID

j67lI8W0FIkJuVhIy/rVc2vkKVJtplIv84iFIPhU+e7BJ0jGayZ21TsWFCjN  
PeWrn6DTQnUCBP9Y4HhZ6zhMfIKokpxuTifGwkT09uVnZk9Qp0lHd0BKLNyt  
e8pAmHuMtNejnpcVx4LLmIAeInmMDHhIHE8sxAJmGRIS9TIXtZjG6TOuxEIn  
XK3KDs1FkgQmBcq1WGjOVDeduZKLG17wHd3cjYWvj9zMEr48QN2bylWdlHHg  
xnya+iLjA6TcFvnX73QcbOxVRvmF/ockXaizhu3i4FnVOKPEwyz0sCA1vMcp  
DkJfNTD0e2Uhhpnjd966xMG7pAFCo2YWWr1+Biv1joPP8p8ZA7cz0TN0ZT46  
Kg74HW6s+Opkl7WREnZp3FAJtrJtU2XgRjrGboIc3FwRa6u8NFrAup0m95T  
W4wDju8D7aIPCCChMoFLwx0ocRBOjr68GEdBW0vUwi604sMm/ZkKvREDDt3Lk  
T5PGw+ezmuRNb/Aoh1KkoIYnHj5sigTd70tDIIfUlsfM4sHM0C2BhgmH5iiP  
VyTejAeuQ47nyt9SUU790pSSdTyMZ72Q6KhJRQyCSQpPnOKBt9K68aNuKtrc  
G9x09ouH6KXIwuWIFFSbY2X1Oz0edi5F6gYeJCH1pUClUwPx4Jpp1dMqkIBC  
BP/U8n6Mhzyallnzu/HopVWYDP9oPBjeE9vdbY9HgmNRoqen4+HmWZ5P7nfi  
EWl38gnRjXgweRVuL1kbhxqLH+7KMSXAkVEzl+tWsUj67rsXuvoJ4Fq58/vF  
YhRyLIY7q2+UA0qp/r7ub6PQ48WOp9dME2BPqU7Z50EUYrLq+c/IKgHK7uwM  
XjaKQt/1P8WbuyfAeREeycXWSPRMetHeAZcA1fHvqBcrIhD3Hi1PyEACvDJV  
/rPzKgyZU/2cdvmYAFINN6RfZYehLPbFvBujCfCtp9+1JDgMsci/O3txOgGs  
9i2CJFTD0BH/QNmd9QSljllfZiwMRTs/v+k4MyZCPY3T6fS9YNRz2BNorJsl  
819+Pa0YC0C0DA2YmkEi2C44ldUXBSANnuekMsajUBjjWcwWFIDEYtGxzJaJ  
sGdu6PzmVACqDVUi9Lgmgk0L8+Mh53voKWlPkUpyImT9rJ5OZPRHgZSpYxI9  
idD9ljYnL9UHkeHap8f6E2EpM1Ha28UHJZz8sXg11Ai7b0UFQ674oKxzrnvj  
44lA5DBoUKTwQTVm2qyxy4ngW74mciPIG22+oL76hSoJjtIKPxjw9UKOxmHN  
qcpJcC/k/k8FvAdam37VoaCWBCw7HBYpPh71985631fNjCAxux7GZOaBosIs  
Jy/pJwHF+a/rD3k90JMIXYNFyyRI2Y3ImqtwR5N/fpyHoCSI0knYDKm7iwwL

PQo3apIgh5zHpzjPBZnWmf1eqU+C8R/S1CQeLsjyvfK1r01J8HZdVqYUc0HO  
68y/xtqTgJQznIbt8x0UIV+p+244CWAzQev38TuoomNrl7iXBDurVh6lj28j  
xiUv1UtyyWDtKVVVI2HBAxw5u3JdVSAaTF9q1hx006CS96to5LBmK3drzyh46  
ICHJY1mC6skQfrOQd1nPAWH+1d+OGifDy/H/ruVX2SPXI7v4aZ9kSO3yTRqj  
tUPvz/jORL9Mhrsl88Pjt2zQyZeFAYp1yfC7b0YiTnKGOSuPsW43JkOr27vX  
Jgl2iNZcUd2qNRLixx9AzqI10kokK1YYsobaawRuT09r1Pk9xXt9IxnqZR9p  
06VZodbKQmozsRSIVTLkTP1yEx1DY48YJVPAG3HGWBb0JrJ7T6vQfj4FVNA3  
efHgm4h83tXl/KUU4KPoNWTkuoU2GQ+HNVKgWlpyY+pNy1Qi19z9lvHFGAv  
bCM7tm6OmhTHxMXyUuCQeSS0TtMUHXvgyzBQkAJFVJNj9nymyPmQdd2rKAWa  
epkrrh2YIPYm3fKGihSQuPbeZqHEBLmiVmnt5hSYejic//OYCeJSKZN3nkwB  
7U1mJd+N6yhAI1r52fFUINjfUFccNEQDhfz8OpypwGpd9UOg0hAJHWkm2+Bj  
hVb//BiEN0SDnQfv5IVSIewuaTOToSE6q+Wu3iGTctSfz55mGTFAozo3tBeu  
pcKl+ov5ekvXkLyB1HXBpFRY083D8VJcH9ErhEYex6WCmqe+sBazPprm662g  
TU+FrdFhU/4VPRS36cSw+V8q2KwFqDoG6KFx3KOO18WpsBNCQh72UBeF9DMq  
mLxPhcdLNerXfukgGyE/RjVKHLxSzC/S272CdE7mFmDUOPC2Mf1W03EFyTG0  
KV2gwQGNUtxtt+wriG6PxUX0KA6WVT59eA9XUHVbaSczGw7qNh0UJNM0EaX9  
QviUIA6S6m99PAUa6Fne9R0/VRw0f50KExtSRa+Mhr/QU8dBtTvDCZoKVdRO  
+d1BWBMHbBW1XdypqmjeMWpsWBsHz1UCf3/XVkv8YIVNsoY46FYsunWq8zLK  
rmaK37bGgb+o4oRXtwpKbnvPftcUB/E2K8SYHUA5vsdH1MNxQMVsxLM/CqhE  
2BbHE4kDpgyBSK7XgLrjD8j6Yv7lv7320zEGEJXu2SWxFBYecieqsXMCChuO  
qVzJwQHpNFI8dR9DnovKGG71ODhyjbJy/79LCCbsC+0bcdCOp3Nddr6EGD/E  
U9s34UCFStlZWuESKqn/0GH7FgcsYDreMaaAviZba1p348B0lPHGBpcCMpUJ  
v2Ix/q8/NVPxmsolCIU3axsc4MDZMpbIyCGHGHzni6/9xkE097pU34YsmnA+



Qn/tDw4GS3/gBrtkkb+Rfo8eWRoEb8a2FgXJokrhaZ2rtGmwl/0Skr7KIKG+  
v1c1T6YB400VmBfvziN6TqSPKaSBmpHygkKpFCLpjR3kVEwDu/34s/M4KbQd  
MmD0UykNnowPMDZ5SaHxWWuzauU0IKf4L5tMQQoVFkXZiFxA1bj1eD2Tkmk  
otDtzW6aBlOCry9vTJ5D/mbX76/5pMF8cqPAxisx5EKXy9njlwZk9vO/r8SJ  
oVuvFx48v5cG7xjw/lumYkidz/+JXXAaODBBjIr/EkWsy9nF41Fp4HU/MBld  
FkWl/tOv2wlpchvWLCbt5iyay7wzm1uRBoddjsVDBsJo/LzzEa+qNjiIGqyf  
FxNGA/10Ehov00DSU4NwnloYNVI7BKzXpoG+IfVaXKMQyvCzYoHmNChVOO9F  
JSKEtEyuq8z0pcGjleDZYDyNytnRE4HVNFB/EqLBQSmACiqVOve/p4FiW7/7  
mQV+9EBXce39ehpcer9w8k4H/z//e1HBezsNmg2zn8Uk8C07vf0DrQdp0MkV  
UXKUIR8dHz5D5kCDh99vim6zivOhECKLzTMhPBQdOzqEpzyFZHyWJZ6ewcMs  
f7/DeB8PWjFq/vVQBA9W699TlrJ40PVjbsRMCTwk3STwbonxIDFCV2eMHB4o  
22sXFc250Rgu7Jy9Oh6WYzT2d9s4kUzS2m8+Bzzcf6NS9GCSA63caevidsJD  
pZ7AzLsKDvRQOyfjhDMeomrmv8rFcCBaOi1Jzjc8nMn2WiCV5EAz8fm2JL54  
SLt1v4En9jhKibXonorGw40grp+0l9nRckR35n/5eKhvez3muMaKWk+1x/gU  
4uHN6pZddi8rym1s8dF7joel9y07ZC9YkdFerSH5CzyMebrnebuwoqbbhYx3  
qvFQU8gZ3/+dBRH0o2IV3uFhze8pN+sBM1LiwfzGpvFQYZpC1SrHhDgaLjpU  
zeIBN5GXfYyLCW2ZyF5PnscDs2anZhopE3qWJnZeeQkP2Kfv9zmzGRELJef6  
s3U85M7sfmDvYUCL3/Yd/P/gYVhYlrcCHUVpdRXGx7klkHaHwzfnmhaJZEev  
cvAQ4C7ZV79YaVrUGmAWcZKXAI/+s474QE6LflwiLeUWJIBRpGPQrUIaZNWk  
TykoRgDvlZQ0w60j6Ny79SpJRQIlieiLeTOpUW+POLOWBQEePJ5v8+CgRA4v  
SAu1LQmgWWfhM7JFgUhSPiletSKAotPQUmgvBZLRC3bStyNA3Im/AZmRfCjn  
Q88bYxcC9BbwLX7alkd3hu+42QYRgOY6/0uZSTJEM/38fVAOARI04iceTZGg  
gqLzld65/+Ypi5rnbSFBKj6vMddHBAjK8G/4mEeCgmg/VNx8SgBdulXt4dsk

aEPmRyZWQgAevxkLl42/2Gi8uh1JlWEGmT45n1b8gxWcn/sd+ZkAp94XkY0f  
/4Vd/uMiFzRjgEPK6HLvpQnsunPvrvcXArwNLiy0qTvATlrSztnN/bs/L+kr  
chYHWEqcVJfaNwKE5t1UepH/E/OZDCVS/yJAIn8WjbXGD0w1lksi8WQ6vN6z  
On/i7S5Gxfg+3porHQqv7V58kLuLdWbc+yrPkw5UE8oN5oG7mE7BcM48Xzqg  
1/6uYbK7mGEbjg47mw7GrLafXEp2MBtyyuUN+XTgvbXwOvnpNhYW+j3P+Ho6  
XK2P6X/XsImpUOf8FTNJB9sSvYXx3E2MIIXrBrlZOmTLHI3gi9jE4nILWcot  
0kHYloRe8comlvraOpzGLh1G6/+fTC2geX++mTZ6JkOvXZCsX1kG1ijX9MJ  
flw6uNkxk4Ytr2JKl9W4ePHpwMqS+MWlZhVrYujh4ULPB85ENrbqyFWsOX9M  
4GRW0mx9/KWpd2oVaxvaEWd5lA6rIQ7iz82/YX3nRFXIytOhdeFelevMMja9  
mOk8258OuSPttPqii5h1FY/r9Id0iF42TflkW8RmQ/LvTg2lQ7XXdvjk2AI2  
z1blPT6SDjEL00kj8QvY8uW+kMEv6SBxuBsgtfoV23pIQXi7ng6aln+t5Zrm  
MQpTj4YnjEQlibWk5cXPYkXTXNMhzESgnKNpSvKaxfRvd1LcYCWCE1XwZbHr  
s1h0wCld1uNEyDU4E0J2YhaTedA7HclDhKEW/HuyvBnMfvYslb04EYrIX6bQ  
NU9j7S6z+sLaRCArx1apL0xhLrvJPuRXiUDe03HLnGoKYwm5mP1FlwgJ1xu4  
/3ycxCxTcXOZBv/qmTOfl/eaxPYrMN8j5kRoctOVdKyawM7sZ/+37ESE/dzK  
0AuVz1h8uOFccQwRlMrSnf0yRzHpnerSkDgiaD7dkPt6dxSbcGD3u5ZAhLXr  
v5IImqOYhM4Y9X4yEfo8cIlLByPYIPutsypElvRzzgpNWo9gXCXOLqN5RFB+  
7fi48NIwVjocvkXRQoQYfe8U9pMfMZMrc/Ujb//xscJlXT+HMJJG1ciiViLs  
3poTqXgbwgweUx/T7yTC+9OV9FzZQ9j+nWTZ//qJUKJpemDKPYQB6X1/qSki  
cHCc9RITH8QGRcv/3PxFBF3lNUo+9wFMYXbZ1fSQCDoj4f44wwEsL0tg0uAv  
ETY0Z5Sk5Qcwb8rMBg3yDMAPh3qy/+nH2L4E+0vRZUBFk4o/E38/ZorX3qLg  
zIAaQaayisBebOrHwtdihQwQufiW/o5HN6Zexnu9QDEDrj/jsJf7sbK7M1b  
H2EzoLL+6i8tezcWNtj7hKiSASE1iaOrDV0YX0n1rVCtDMh4F3HSnq4Ls7sV

MWZgngG+X/P2ymo7sG9t3L0/72WAz0vzjnXNNsz/YpDIYGAGJCHGq4+F2jCq  
F+PrRcEZwEdcvZda0YbxpmeYWIRngHiM8RhZSytmbMNs2hSXAY+HG89HK7Zi  
zX8o5iIyM8DE/pZPotl7LEN+9Qfdywy4IWDs6WvfggkWayXM12RAPc96eNKV  
FqyC5znn69oMiM9uzx8Qb8F6KB0wt8YMaEr9tjaz14yRfvwSOfAuA+6NCi2d  
SmzGXNyHGliDGWAEFn/i/N5gys/rBXk2MmDi9OfEc36NW01D6hLxrQw4c1Kh  
0Ee1EZPMMDqvtJMB2uOWNRwsjRhP5JqyxY9/8cXbql6lDdiBBf+tbJJMEKDh  
lbv9rR6rZEq4z86cCR6h5/40+NRhgv5mDIzSmSBVHTtj1FmD/edWQOSRyQTK  
kdLco49qMBb7bS4JuUygELuzz+hfg5EYJlTeVcgEfbMHTOtnarBJ0RbNRJVM  
CFJ4vU0Z8hLL+HlmtowE35c4s0+ZV+NHR32oT1+PROy1UwopJSrsaiet2lC  
JplA71MgE8VdjXnWWTxSu5EJ5z/Pyq4NV2G6BNzrSNtMEJsU+dKqU4W1xU+q  
Euwz4Zd4Q06oSBWmGCbS88QxEy4MJDWL0FRhIq6t4y13MqE391pgXHsl9tiW  
2eaD67/8GRKXCPmVGle55fL03UyI8xYsGY+qxHD6xe4bHpnw9GGntaVdJUat  
8WP/r1cm7AaVr3OrVmL/A1GHadA=

"}],

{RGBColor[0.880722, 0.611041, 0.142051], AbsoluteThickness[1.6], Opacity[1.],  
LineBox[CompressedData["

1:eJwV1nk4FYsfBnAqZlVblbIkylKKtEiFvImoLIWynoPjnGNJtmxZsm/HmbIf  
0iWUpSRZCoXUVaQsqRuha4sKdUm26De/P+aZ5/PMPzPfed/vjBzN04yxgouL  
a448/n/Wmv7nP28RLh0u310j6X2HdT5eHikf9+/TccgxCjS3kEVYy8bZpf4T  
OgVyKsNq+mpoHz5gwfZf0okqW8tnrgTMTj3TC/EXRmjGpuJ96YQXFij7eu/  
EYs7h7lzp6lID919wMtfBWbVepKzOueQo9J3ZQtNFaVR16VG1nigsC/u1zvJ  
nZAeNLhs3OuB3pzJzKpahCZMvt04oAXJpePFPC47UaP1FjjrafeWNs4ue3N  
hn0oFPYXe9PgCxsdPQ0Pf23w/og6PrAjCKpxyjM7fmqD2ZbNlokJwop2UZ4Z

v0NwN/ugnt8bhFvUvs5gPx3wBWW8iUglxvIhzft6dcAe3pCu5p4QnKR2mZnV  
6uIS/xg7xC4MByMNePfO66JaOLDxfkkY5Avratcd0IjhhqSK8c8wzE9ck+2u  
OQJH/R+VzUfDkR96btK+Rg/CT6ZENHvC8eMqL+vc/aOYyPYSj5iKQP+jC9qm  
s0fREVSyuFcsEi3D49/VNAxQURY4kaMeib92vLH8cc8AwX2nZDgBkTj6MFch  
+J4hLBmx6kpzkjc8sL8pvvo4GuZFE9XH06ApeXauoNIEPZ7itoyCGPw96Pf9  
2DcTCPTeTmk+iHRrfCxb8qm+P3fk6HizhhQtTLea+abQvbYW1dZ7lgecvuPQ  
62p4EhtC3Ozv2caC3pH4kFvjFIgCvtUtfHEoVk+u6bI4Bb5nP2b8pOMwkZVR  
VeRzCINC+/6eUYuDpy2v1LjsFOo3rNBzt45D3PS9q1kKZtj58c8a7eI43Fw3  
GLJLzBz+7b9MKrXjMXlhNHDVbnPIIm1IPFjJGY0//u08/puZYGUu/7eoYj4eF  
s+6hieaYrtE/FRwdj5cawpTWFRZQSy5xqG2Jx3fr/dq0/1lg6+uApv5jCdiX  
c2kp6dUZbHFwIUpsY+FW/tTeV1/PIPLLY/VkBRZki864C/JbgkHZe8TnOAuC  
5TIfYo5YomC7u9RbJxb+bSqrCaqxROfgOGVLOguskVfn6flWuPBk8KvwFAu/  
P+++lddohebXQRTFJRZ8JzMG+3utQBvNnJRbnQj7Weop6/XWyCxx1niyMRF7  
+b+pmrCtYbne/E0lQSL6d4h80fC3AedauXZgRiLMd52X80u1QWOaYnx3biJa  
1P+qxii3AcPgzYBsSSiQD+U+2/HVBtp6HR60B4mIP7nzhyDLdJkaQXV/YnY  
7WvqIHjcDmVxX8Ufy7JRFfjJMXS2wyOV9yGZW9mQDI3fHhNthwfp83mWamzw  
xX7U5mq0Q1iTWGuSDhu9HE+pmT0U006t5kzZsRH74PK7/o1U6LaFsNNS2fi2  
GBCcoU3Fx7Tq8NQrbFhpOciaUKjoG7v5/kleG8r1am71V6kQW5vutVTGRntD  
x1K2ID2kM8ddR1rY2P+7Nt9c0x5Gt31uyLezka+TbyBoa4/3+ffqjN6y4fvI  
Jznoij0OpnWJWQ2wITSQkFIq5ACZsdxZ+zK2wL1Mj5d2QGEH0/vLEht+cj4a  
9B0OGApJ5rdfSaDf0aZXysgBwgpOGnxrCNwdVFZMTHTAOrGd85abCZwZbqt1  
FXDEZYWwZBkDAqxVYotLOuLXceoo5QSBRvkqppyI3b8bOhKMCWwlXF1Zfcx  
R9i2E9zFlgQWR9yNDRMccVtj1pfbmYAA78Am+SxHjKx7fqBEjQBd8fTU72JH

TLrzjR3yIPCKqc253+KI30eb8/b4Ebg2KjyguJqGVn2hIwaRBLr4IitXbKBB  
b53oWYcYAvxbf8b0K9GQp1Zr5RJPwMelXznDglZYrWhR/UsE9D+X+fLE0fDh  
ZniCehaBIP4tBgMZNDQcqW1qySZQto0jUV9IQ1xz2M4TOQQ2uIU1+D6lQV39  
uq1sAYEvX0xXD/M4oVvmBY9wKYGjPz5/LRdzgvD5ZpPl2wTyl6LaQ7c4Qf1i  
je7gHQK2ojUZ6w87YcUyHxFZSaBGwixo2NQJc2mbxXSqCYhtGafcpTohWqmy  
aPIegRfqsgonQpzAFV1xWqmOnJ9O3eoNiU6A18dr5Q8IRBtajA9nOaHm6rK1  
Sj0Bbdv4yov3neDNKvHlftTef/j3wxVTTkjs9MoRbyYgwGIphHHT4fgt75H2  
UwLMVHl+I1E6Er9m/7J6RmBTodXrERU6ileVr3NvJRByZ6qyQouOFUOl0vTn  
BN7XsDlhj+gI3bI/+WQbgaS2R1QJVzqKjBvF+V4SGO+y0f0UQEf93F+nOkgb  
9v9QqIyl43H8a+OkVwSuj17iD0+nw41qKKvXTod7v60TRtfpcOn52TdOmrrw  
+LVEJR3elJfZrNcE6lZSjq410bHfsN5jYwcBceFZTuVrOjwX75+9QdpHPDk4  
/CMdbf+UFW3uJPOxabu98SQdXIdSNdJJK29r1pVcouOCtYnaEunY3faKo4IM  
mOjSbti8ITCkOc9fjcmA7ef24tukoZ86Eb6NgZ+0dKOfpK+aqHQY72cg8El5  
/t4uAnOWz6okDRjYt0m23oW0haNj5uhpBuJYA7dTSJe7LQZX0RlokipiOrSat  
5JtuH3GeAa0BM5sW0i6h04+YRDJgOrN8oIt0c2yrolQyabcZjXekNyc5CYzl  
MpBmsZf5ivTFrKWJqjIGfFtq3z0k3ZPP6YioZ8CgJyo7j/S+0l3VJi8YoOUk  
PQ0hnVLdlin1gQHpbf2uJqQnGxghY58ZeHnJjSNO+njLb/vq0QbahvY4viWf  
r6gj60gkHxPuWvu7WaRXfdijZCrOxOrbfn9okHYYfikgrcDEj2NfpHrI+T2c  
cJ4c28NEglKagC/pDbPcndW6TEjbeH9bRdqX62p15CkmJGbCetnk+3nNvy/L  
1IGJmZEVQ4KkE6TdHD6HMuEmmx70jXzfnxRW6d1jM9FexVa2IK27M0cpKpuJ  
6Odu8rJvCwc7pyUrmUiQCQ32oTM00lXVX6lViZCI5Juh78gUJjE2rKrm4mU  
CrOZYjKP5h91rfTnmbh36efOXjK/N3lzfUz5nbHtverx0RYCCKqLbGsJZwRs  
HOkYI/NeGILLZdO6AM1zfBwa2k/1YcV2kN+CYM3zGSxuq/iZg1Xb2Z4S1M2QP

CDUIPSHAIm/PeOCM3bVzhuqNJF5vZ+W1lDrjP3dMYkLZB+r+r+XtbQ6Y+Bz  
/lsO2VcBXuPWzm5nLFxef35HLYH7FjzLn+adEZ2X/lWT7Lfolj+zyEEXSC49  
vTVD7ofHOywpOtS5IPiOiNpQHjlfioLt+cuaL99/MpSLgGPYBFP3x4XFJ9e  
xxQl95HU82cF8QsumC4cZWY6Qs7feb/w3Y0uSKkzej6cTEAxX+Jf7geuEDbh  
mZMIJ/vc6rcg2OYKfZ6Pd5tCCXR+7xAT/+AK63U/H9KCCYTpsl4pL7riut17  
rmR/su+9CxVmmm64YWr2Nted30/re2MKHrhjcbiPQCq5v+cvjdbT2twQk69u  
OGRB5pt3ekbugxu2Ww6MqJiR+3WGn3ltwQ3jkbxeFUbk/N9oHP3rwFl83yrG  
H3SYgN+IVF70/bPo4s64IqxM5o3nRByr0h1connFqbNsqE/Xxnvf8kDpTPxR  
3Vg2Xph/7ZCr84CXV5NUQyQbtCpqqc4WD1wYJLZphLFxyS/s9u5PHkizmeKV  
C2RjbFavc1rWE+lUS+8uVzau/GqX8s/wRHfnb4NGIza4Vp63rIcX1nofyH0p  
ygZDKOFL03Zv0Hzsr4+nJMKrf27Me9t5/PIQRcnKkwXPtwpCeix+eGewZ7nU  
PAEh7Vojtf/4w+uRB5WlGY/WeE7Gu45AHDHIOGMnEgcB5zvu624GwXzLQuuJ  
5RgkrhKUWiwJwan3g1/0/o2G5I2TYdHXLqKhR0/8VWcUTKq3rco8GA5R/yIz  
ucFI3Jl9sbdpfpwTkb16PfDMWAdaLVwGLCuR/7O6TKvyCEeCjMFLkV4pCyZmZ  
38aK4eDTELzrsiUaaQ7hXVvzLyIqLNK4e00MuALWF7YphSK3SOrMxjWxCfTX  
K/YpLxjqtD+9fX7F4nXZfj6UYRDMZLicJT7FwVdlwPMszwWI1K1pTR2Kh9Co  
pEBTTQC0jgVrb3qdgKzqrOP9yf7Y+FNA5uJrFsQ7RtodaX4I5rncrfoiEYd3  
PTw6YeAL8yLvou/32Gg8vXLtX8bn0bbVfyCG/M71n+P71HzCBw1a3So7Ci6h  
1CosUNPZGxpmu07Lsy+jp1rceFWKF4oLTv8I0EvCnoiKJTt3T/iMHjZg1iWh  
cGeSzc1P5yAkpXPy0MFklNmrVGSedscQ5+xgzt1k7CjgkxGccsPF9LW0YsUU  
nOnROk0rdMXnyOec7BspKH2sebDgpAuSa++eWS+dCsrNP0Ib5ZzB/29JW8jV  
VOwkjrU2f2FAL05aNVEyDZqC2xaUWuh4GNAGsTkpDU8vTvWoPnPCkivvB/ki  
6bg/qFtENNCQEGH+6VZsOgQO2l5ZfuOlzu3ly5TFdKyZVN+kOu+Ar80bX85f

yMCHFLGUa+sdclikTl7mewaMuAKr/HKpqMnlK1WZysD2vwzNSjKpUMuw2KP9  
IwO2/b4+/clUyERNHraby4D+IrHfOJqKBbvN9le4OHhGiezUcqWiQpSVJf4H  
B3l13tNOe6iQD7ReI7Kbg8AQm6z2FgqyPQrTzfZyYFve2L/7MQVrGdPSqvs4  
ePhjIpvzgAIuM2K78UEOLtiZhzDKKOjb3mSYqMtBFJP7xdo0CjI+bo3iM+fg  
UaYbpdKeAuF3fgLrT3Mw3sE7p2JNqfSLx8mKlhyMJWny3DSjwKfw7pq+LQdP  
jZX9C/UpMElnqo9y4sAq4lBj+XYKmhP69FIZHKDoUfs+BQq0wpVf5DtzMHzb  
jNkgQ4Hyub97ms5y0C1AG+z4g4l8pz9oHefl6xrrazyiCFgywoX7+150DzdND  
kl9XUZB08pbXd280JpV4+i4s24HPYG7293kObjaZCgvM2eF/keI5rw==

"}],

{RGBColor[0.560181, 0.691569, 0.194885], AbsoluteThickness[1.6], Opacity[1.],  
LineBox[CompressedData["

1:e]wVx3k41IsCh/GpbCFJyk5JRbIWkxjzXSqktAh2ZUINBwjEcky1pDML7Jl  
TWQdlZQb5UioECEiSyeULIWo7nX/ej/3+Wx38jF3XUsikS6v9v/rzL+bpW8k  
UUKkntSI7G7KUOJ4xRfGILU0MPTLxrEEaugLKb9SxlfqAW3rBErHPSrTZcxw  
VnSBOrv1madV3VPq6zEti3jGb+p7L/uM+NJ2alxVc8VmJ7XwExQeTtv2jlrU  
60v+KMqFSMG/9xDMDF071KXqy5rXQ9jn9HLEtU/UxblmWjBjAy5YLHXquXyl  
JljXjudfF4SlbdRf4tfmqNm1AsV8HkJ46nAv0r5/gVop5nLeV08Yi28XG2VZ  
K9RngbUqfa]boauoqXbUgYTuPoF56owI3Bt4TjP2rsO/Wi73C5vFwMNY4t6r  
wgW+ZQHK3wwpHMummd3u4YekjQvpvYkM0qgRriYUQYgMDnzMub4NNTyMz80  
K

QlCgqBdwe8gi7ZN47YUTW6H+dYCrznIHgmYDfHXiRaGdyXTz1pODWeYMT+Ow  
OEx+Dyh2i+5C71lZSUqPDKzuMROiOXZjYtlk2F170+zPqH/TntmNulZn4303  
ZUF/wqzKbVZA5q8FpRHGTqReVte6wFDCW6Ukhso/ishSGkzf4aQMUtG42niA  
EgoHmb96TFsw21RnXlFDBQNZ00NZ11WRILPfr9RdDdN/DPI4PdQRlu5se/6Y

BuasxCyGhtRhImVcqNZSE4tl0xy1lvuQ4N3wI9yeDJJ92tnzevvBqaUUUBCt  
BaH/TcT0iWqiXpd300MJXWwVed5fek0Tsh0HnjaYUCHhkxYXxUHGgrw8b7g+  
ICdD+6o1Q8YfRrd4XJgeNEPTKnKatcA0zNaTkabBhkojezMosOuyfqHSbgxl  
5p4stQUKXlhkaW7KOoK1rwU5f/jrQivfhqeEfhQldoOdQf5UGMVaFsxuM8Ef  
Xe0HtEfAyj9HHhDHZWBm99bcvFYfhiTFI628FviewRXr9cAQC7nGXR10tvjw  
NJByfNEQ1lYWqjmztngx9mVGLXwYHoa0WxfDziBzb9ep7/cPY/5xurZuvh0M  
H2fvDLpvhGJH3/bpSw64+f5AQ3TNEfDkT919PuoEbXHPpbxqU6z0Tzms43PD  
8xH/GeNvpoiWmxg+dNoNx0qufP625zi4C1nDQyVusNNh9WrnHkfn4Qh3EVN3  
6JU7DLgbmcGIS2cqlOUBI464x2vIJ9CUS49maXrh7paRYDXhkzBvdytNPEWH  
Zta130mvrPA2ekCiWiUAUXWJPR+k7DCwRUs+tTsMk5PHecY4neHgS1eicsVg  
Wa9zWrL2LDjsb9y3GUxErMhAZF6dBypkp3ubM10gMV8bTS/xxk9cL5DfTcCV  
P2ayQZG047RlzyTrdFz4sPSZruCHi3GLMp3lmfDp3slP4/RHTecVxzVWOQh+  
rTNe+46B5FbRuMzHt9ESTbB60i7iFDfEOaKSB95z5ee33L2Esfwvqp8C8xHH  
wSexUhwMuZfy3gavCiBeYBYakROC9eRFs2C+IpiWKHDcPHgFZE05DX1yd1C+  
2La/4UAYXMOsyyYMixHb9ipgZedVxAnIf5QyugvOsLld63eH47zFxI8msxJw  
k/kq3XZEgPOBhpDY4VKEh1416ROIxEv+yWnP7feQXSRhJSUQhQwmnUIZWwYN  
p810319ReP2l1IvZUGZzadI5sU9MPD/mZkcPL8fGRwItKaPR6BUVbmFur4Dh  
5yCKzJsYjPMLfKUzKiC1wCsd8iYWKc2Tt7raKxDEmdin3BaHBjpt6E6ZSpws  
ohfN3I9HvaljkMa5SrTKMz5G1iRAn9yU4FNZiXqdPqW9eddg0Mo1oTVfCbK5  
mqVcfClehERmpatW4U6e5fcAWhLeJKv8HPGpgu+/eofPPkrCj7wu5aWiKvBL  
UM10DybDxqPwYfXHKowSniNZlcmQFeh3HxauRkiqkNOdXddhPCZWkUGrxsTV  
I8StgutYVgvKaPOvRnJtpZWIZAokDYpeudyuxvrh4tbgiBRcMmrw131VDRpT  
Ujlo/AbK0ORGlxer8TigXkw26QZEZrdTFiXZ4PiLXpe7MRXx0nNVGwzYiAk7



+akkKhXdUfV737iw0alY8efMSip60/VjTCPYmGqSav8ZyIIBfV65KZ8NveJH  
ctIzLDTdOhMd28DGw2zuUqU5Fpzzdjdzn7KhyrLYR/nOwlT/jsmlVUuHT+vZ  
LrGQrd46EPKMjWVbWft0EoF3c6H+9CY2qgRj07ZuIIAg3x14ooUNuYvWAhvV  
Cfgttyz9esPGLe/CVOn9BPQFCloYHWwIuc5LKmsSkBPzD51ZNck8QdHkIIF1  
Xvzpo51sDCo2GMXpE6AHNca9eMsGa0g+nPskAcDrLMJvWxs6PHnFbEkoP0s  
NYazj42ItsbkXaclvOyaSL68at9a25xDpwn8Xldk7tXPhmlK0pNwZwKX1oil  
Hh1goylmkJbiSuCjv8No46p1ruxpyz1HIHePosjBQTb2eD3vb/AkYHrPUUX+  
Axu3nTc5dXgRSN7VtZl71aI2dhPDPgS8yFODW4bYSDIruTBDJ5BXk5kQv2ru  
wOuL//UjMM1YkF03zMb/ABYGoFY=

"]]]},

AspectRatio->0.6180339887498948,

Axes->{True, True},

AxesLabel->{None, None},

AxesOrigin->{0, 0},

DisplayFunction->Identity,

Frame->{{False, False}, {False, False}},

FrameLabel->{{None, None}, {None, None}},

FrameTicks->{{Automatic, Automatic}, {Automatic, Automatic}},

GridLines->{None, None},

GridLinesStyle->Directive[GrayLevel[0.5, 0.4]],

Method->{},

PlotRange->{{0, 1650.0321}, {0, 5690.553682}},

PlotRangeClipping->True,

PlotRangePadding->{{Scaled[0.02], Scaled[0.02]}, {Scaled[0.02], Scaled[0.05]}}

Ticks->{Automatic, Automatic}] \) \!\(\\*

GraphicsBox[{{,

{RGBColor[0.368417, 0.506779, 0.709798], PointSize[0.6], AbsoluteThickness[1.6],  
EdgeForm[{GrayLevel[0], Opacity[0.3]}]},

{RGBColor[0.368417, 0.506779, 0.709798], PointSize[0.6], AbsoluteThickness[1.6],  
EdgeForm[{GrayLevel[0], Opacity[0.3]}], PointBox[NCache[{Scaled[{Rational[1, 2],  
Rational[1, 2]}]}, {Scaled[{0.5, 0.5}]}]}]}],

AspectRatio->Full,

BaselinePosition->(Scaled[0.1] -> Baseline),

ImagePadding->Automatic,

ImageSize->{10, 10},

PlotRangePadding->None] \) blood

\!\(\\*

GraphicsBox[{{,

{RGBColor[0.880722, 0.611041, 0.142051], PointSize[0.6], AbsoluteThickness[1.6],  
EdgeForm[{GrayLevel[0], Opacity[0.3]}]},

{RGBColor[0.880722, 0.611041, 0.142051], PointSize[0.6], AbsoluteThickness[1.6],  
EdgeForm[{GrayLevel[0], Opacity[0.3]}], PointBox[NCache[{Scaled[{Rational[1, 2],  
Rational[1, 2]}]}, {Scaled[{0.5, 0.5}]}]}]}],

AspectRatio->Full,

BaselinePosition->(Scaled[0.1] -> Baseline),

ImagePadding->Automatic,

ImageSize->{10, 10},

PlotRangePadding->None] \) liver

\!\(\\*

```
GraphicsBox[{{},
{RGBColor[0.560181, 0.691569, 0.194885], PointSize[0.6], AbsoluteThickness[1.6],
EdgeForm[{{GrayLevel[0], Opacity[0.3]}}],
{RGBColor[0.560181, 0.691569, 0.194885], PointSize[0.6], AbsoluteThickness[1.6],
EdgeForm[{{GrayLevel[0], Opacity[0.3]}}], PointBox[NCache[{{Scaled[{{Rational[1, 2],
Rational[1, 2]}}], {Scaled[{{0.5, 0.5}}]}}]}},
AspectRatio->Full,
BaselinePosition->(Scaled[0.1] -> Baseline),
ImagePadding->Automatic,
ImageSize->{10, 10},
PlotRangePadding->None]\)      gi
```

```
(*-----
-----
-----next mouse*)
```

```
vn=readTac["C:\\Users\\exx\\Downloads\\TbD120M8, Liver 3.6245, GI 1.199, ID
3330.csv"];
```

```
Lv=3.6245;
```

```
Gv=1.199;
```

```
id=3330;
```

```
vn[[1]][[1]]
```

```
{{10,179.313},{30,304.088},{50,86.5522},{70,44.4515},{90,34.1386},{110,26.348},{130,22.1737},{150,21.214},{170,18.4252},{190,18.1028},{210,16.3627},{230,16.4386},{250,15.8408},{270,14.972},{290,14.5074},{330,13.0123},{390,11.6244},{450,10.9161},{510,10.1312},{570,9.78562},{750,9.0774},{1050,8.09786},{1350,6.07057},{1649.91,6.30879}}
```

```
model= mouseModel[Lv,Gv,id,29]
```

```
ParametricFunction[!\(\(*
```

```
GraphicsBox[RasterBox[{{179, 179, 179, 179, 179, 179, 179, 179, 179, 179, 179, 179}, {179, 180, 180, 180, 179, 179, 179, 179, 179, 179, 179, 179}, {179, 179, 180, 179, 179, 248, 248, 178, 179, 179, 179, 179}, {179, 179, 180, 179, 179, 253, 248, 179, 179, 179, 179, 179}, {179, 179, 179, 179, 179, 248, 248, 179, 179, 179, 179, 179}, {179, 179, 248, 248, 248, 248, 248, 248, 248, 179, 179}, {179, 179, 248, 248, 248, 248, 248, 248, 179, 179}, {179, 179, 179, 179, 179, 179, 248, 248, 179, 179, 179, 179}, {179, 180, 179, 179, 179, 252, 248, 179, 178, 179, 180, 179}, {179, 180, 180, 179, 179, 248, 248, 179, 180, 180, 180, 179}, {179, 179, 179, 179, 179, 179, 179, 179, 179, 179, 179, 179}, {179, 179, 179, 179, 179, 179, 179, 179, 179, 179, 179, 179}, {{0, 0}, {12, 12}}, {0, 255},
```

```
ColorFunction->GrayLevel],
```

```
BaselinePosition->Bottom,
```

```
ImageSize->{12, 12},
```

```
PlotRange->{{0, 12}, {0, 12}}] \) \(\(*
```

```
GraphicsBox[{{}, {}],
```

```
{GrayLevel[0.55], AbsoluteThickness[1.5], Opacity[1.],  
LineBox[{{9.09090909090909*^-8, 9.090909090884856*^-8},  
{0.0874367476365131, 0.08197166587636243}, {0.18222810297558026`,  
0.1358255024317191}, {0.27073779576926765`, 0.13315455086535802`},  
{0.3575112797365835, 0.08143316377978886}, {0.4516394623155443, -  
0.007347854733426912}, {0.5394859823491253, -0.08816932746972758},  
{0.6346872009943513, -0.13787329990112937`}, {0.7281522108132057, -  
0.12816574147938434`}, {0.8153355580866803, -0.07001063326902106},  
{0.9098736039718, 0.02121659675083076}, {0.9999999090909091,  
0.10024804094746914`}}],
```

```
{GrayLevel[0.55], AbsoluteThickness[1.5], Opacity[1.],  
LineBox[{{9.09090909090909*^-8, 9.090909090880112*^-8},  
{0.0874367476365131, 0.08090369567458766}, {0.18222810297558026`,  
0.12746559200130417}, {0.27073779576926765`, 0.1116266937044405},
```

{0.3575112797365835, 0.046963725126600256`}, {0.4516394623155443, -0.04509050859182233}, {0.5394859823491253, -0.11115559892361665`}, {0.6346872009943513, -0.12642564594664163`}, {0.7281522108132057, -0.07740196037964171}, {0.8153355580866803, 0.004179083230780074}, {0.9098736039718, 0.08937493944143977}, {0.9999999090909091, 0.12834702174618903`}}},

{GrayLevel[0.55], AbsoluteThickness[1.5], Opacity[1.], LineBox[{{9.09090909090909\*^-8, 9.090909090875369\*^-8}, {0.0874367476365131, 0.07984396759533968}, {0.18222810297558026`, 0.11939549826670079`}, {0.27073779576926765`, 0.09184904274707059}, {0.3575112797365835, 0.017913117173780694`}, {0.4516394623155443, -0.07109962300031061}, {0.5394859823491253, -0.11717052830989395`}, {0.6346872009943513, -0.09879571259704382}, {0.7281522108132057, -0.022693471356141894`}, {0.8153355580866803, 0.06128703302641453}, {0.9098736039718, 0.11605625481609519`}, {0.9999999090909091, 0.10415981267620744`}}}],

{GrayLevel[0.55], AbsoluteThickness[1.5], Opacity[1.], LineBox[{{9.09090909090909\*^-8, 9.090909090870287\*^-8}, {0.0874367476365131, 0.07879243663407876}, {0.18222810297558026`, 0.1116081822210312}, {0.27073779576926765`, 0.07372482040530459}, {0.3575112797365835, -0.006267252216927747}, {0.4516394623155443, -0.08743897872291118}, {0.5394859823491253, -0.11109134853087661`}, {0.6346872009943513, -0.06371549528296311}, {0.7281522108132057, 0.02544576624054603}, {0.8153355580866803, 0.09464282937855747}, {0.9098736039718, 0.10731931496853601`}, {0.9999999090909091, 0.0516787429232188}}}],

{GrayLevel[0.55], AbsoluteThickness[1.5], Opacity[1.], LineBox[{{9.09090909090909\*^-8, 9.090909090865543\*^-8}, {0.0874367476365131, 0.07774905743802465}, {0.18222810297558026`, 0.10409673959866513`}, {0.27073779576926765`, 0.05716133039337165}, {0.3575112797365835, -0.026084496726167965`}, {0.4516394623155443, -0.09591154799603378}, {0.5394859823491253, -0.09685594593277226}, {0.6346872009943513, -0.02730376120671303}, {0.7281522108132057, 0.061646715198529656`}, {0.8153355580866803, 0.1046634148537508}, {0.9098736039718, 0.07509702498429204}, {0.9999999090909091, -0.006536873471333553}}}],

{GrayLevel[0.55], AbsoluteThickness[1.5], Opacity[1.], LineBox[{{9.09090909090909\*^-8, 9.0909090908608\*^-8}, {0.0874367476365131, 0.07671378556951527}, {0.18222810297558026`, 0.09685439581479163}, {0.27073779576926765`, 0.042069810325321415`}, {0.3575112797365835, -0.042006785469922474`}, {0.4516394623155443, -0.09808544986431629}, {0.5394859823491253, -0.07760167026270944},

{0.6346872009943513, 0.0063643674428021085`}, {0.7281522108132057, 0.08405712128907425}, {0.8153355580866803, 0.09555213349985489}, {0.9098736039718, 0.03202960165577907}, {0.9999999090909091, -0.054402034659985464`}}}],

AspectRatio->1,

Axes->{False, False},

AxesLabel->{None, None},

AxesOrigin->{0, 0},

Background->GrayLevel[0.93],

BaseStyle->{FontFamily -> "Arial"},

DisplayFunction->Identity,

Frame->{{True, True}, {True, True}},

FrameLabel->{{None, None}, {None, None}},

FrameStyle->Directive[Thickness[Tiny], GrayLevel[0.7]],

FrameTicks->{{None, None}, {None, None}},

GridLines->{None, None},

GridLinesStyle->Directive[GrayLevel[0.5, 0.4]],

ImageSize->{Automatic, 28.4375},

LabelStyle->{FontFamily -> "Arial"},

Method->{"ScalingFunctions" -> None},

PlotRange->{All, All},

PlotRangeClipping->True,

PlotRangePadding->{Automatic, Automatic},

Ticks->{Automatic, Automatic}] \) Expression: {Bl,Li,G}

Parameters: {k1,k2,k3,k4,k5,k6}

]

```
Manipulate[Show[ListPlot[vn[[1]],PlotRange->Full,PlotLegends-  
>{"blood","liver","gi"}],Plot[Through[model[k1,k2,k3,k4,k5,k6][t]],{t,0,1500},PlotRa  
nge->Full,PlotLegends-  
>{"Blood","Liver","Gi"}]],{k1,0.001,0.2},{k2,0.0001,0.1},{k3,1.*^-  
6,0.01},{k4,0.001,0.2},{k5,0.0001,0.01},{k6,0.0001,0.01}]
```

```
Manipulate[Show[ListPlot[vn[[1]], PlotRange -> Full,  
  
PlotLegends -> {"blood", "liver", "gi"}],  
  
Plot[Through[model[k1, k2, k3, k4, k5, k6][t]], {t, 0, 1500},  
  
PlotRange -> Full, PlotLegends -> {"Blood", "Liver", "Gi"}]],  
  
{{k1, 0.0084000000000000001}, 0.001, 0.2}, {{k2, 0.0009000000000000001},  
  
0.0001, 0.1}, {{k3, 0.00108}, 1.*^-6, 0.01}, {{k4, 0.0018}, 0.001, 0.2},  
  
{{k5, 0.01}, 0.0001, 0.01}, {{k6, 0.0004}, 0.0001, 0.01}]
```

Part::partd: Part specification vn[[1]] is longer than depth of object. >>

ListPlot::lpln: vn[[1]] is not a list of numbers or pairs of numbers. >>

ListPlot::lpln: vn[[1]] is not a list of numbers or pairs of numbers. >>

ListPlot::lpln: vn[[1]] is not a list of numbers or pairs of numbers. >>

General::stop: Further output of ListPlot::lpln will be suppressed during this calculation. >>

Show::gcomb: Could not combine the graphics objects in  
Show[ListPlot[vn[[1]],PlotRange->Full,PlotLegends->{blood,liver,gi}],\!\(\\*

GraphicsBox[{}],

AspectRatio->0.6180339887498948,  
Axes->{True, True},  
AxesLabel->{None, None},  
AxesOrigin->{0, 0},  
DisplayFunction->Identity,  
Frame->{{False, False}, {False, False}},  
FrameLabel->{{None, None}, {None, None}},  
FrameTicks->{{Automatic, Automatic}, {Automatic, Automatic}},  
GridLines->{None, None},  
GridLinesStyle->Directive[GrayLevel[0.5, 0.4]],  
Method->{"DefaultBoundaryStyle" -> Automatic, "ScalingFunctions" -> None},  
PlotRange->{{0, 1500}, {0., 0.}},  
PlotRangeClipping->True,  
PlotRangePadding->{{Scaled[0.02], Scaled[0.02]}, {Scaled[0.05], Scaled[0.05]}},  
Ticks->{Automatic, Automatic}\}\}. >>  
Part::partd: Part specification vn[[1]] is longer than depth of object. >>  
ListPlot::lpn: vn[[1]] is not a list of numbers or pairs of numbers. >>  
ListPlot::lpn: vn[[1]] is not a list of numbers or pairs of numbers. >>  
ListPlot::lpn: vn[[1]] is not a list of numbers or pairs of numbers. >>  
General::stop: Further output of ListPlot::lpn will be suppressed during this calculation. >>  
Show::gcomb: Could not combine the graphics objects in  
Show[ListPlot[vn[[1]],PlotRange->Full,PlotLegends->{blood,liver,gi}],\!\(\^\*

GraphicsBox[{}],



```

AspectRatio->0.6180339887498948,

Axes->{True, True},

AxesLabel->{None, None},

AxesOrigin->{0, 0},

DisplayFunction->Identity,

Frame->{{False, False}, {False, False}},

FrameLabel->{{None, None}, {None, None}},

FrameTicks->{{Automatic, Automatic}, {Automatic, Automatic}},

GridLines->{None, None},

GridLinesStyle->Directive[GrayLevel[0.5, 0.4]],

Method->{"DefaultBoundaryStyle" -> Automatic, "ScalingFunctions" -> None},

PlotRange->{{0, 1500}, {0., 0.}},

PlotRangeClipping->True,

PlotRangePadding->{{Scaled[0.02], Scaled[0.02]}, {Scaled[0.05], Scaled[0.05]}},

Ticks->{Automatic, Automatic}\]. >>

Clear[newmodel]

newmodel[k1_,k2_,k3_,k4_,k5_,k6_][i_,t_]:=Through[model[k1,k2,k3,k4,k5,k6][t],List
][[i]]/;And@@NumericQ/@{k1,k2,k3,k4,k5,k6,i,t};

fit2=NonlinearModelFit[vn[[2]],{newmodel[k1,k2,k3,k4,k5,k6][i,t],{k1>=0},{k2==0},
{k3>=0},{k4>=0},{k5>=0},{k6==0}},{k1,0.0084`},{k3,0.00069`},{k4,0.0018`},{k5,0.0
1`},{i,t]}

NonlinearModelFit::eit: The algorithm does not converge to the tolerance of
4.806217383937354`*^-6 in 500 iterations. The best estimated solution, with
feasibility residual, KKT residual, or complementary residual of {4.39667*10^-
14,0.000747491,1.9251*10^-14}, is returned. >>

FittedModel[newmodel[0.0492604,0,0.000919984,0.00602799,0.0751223,0][i,t]]

```

```
Clear[k2,k6]
```

```
fit3=NonlinearModelFit[vn[[2]],{newmodel[k1,k2,k3,k4,k5,k6][i,t],{k1>=0},{k2>=0},  
{k3>=0},{k4>=0},{k5>=0},{k6>=0}},{k1,0.0084},{k2,.0009},{k3,0.00108`},{k4,0.001  
`},{k5,0.01`},{k6,0.0004}},{i,t}]
```

NonlinearModelFit::eit: The algorithm does not converge to the tolerance of  $4.806217383937354 \times 10^{-6}$  in 500 iterations. The best estimated solution, with feasibility residual, KKT residual, or complementary residual of  $\{5.67341 \times 10^{-12}, 0.00138098, 9.86641 \times 10^{-13}\}$ , is returned. >>

```
FittedModel[newmodel[0.05046,5.86338*10^-  
13,<<22>>,<<21>>,0.0723124,0.000159408][i,t]]
```

```
{fit2["AdjustedRSquared"],fit2["AIC"]}
```

FittedModel::constr: The property values {AIC} assume an unconstrained model. The results for these properties may not be valid, particularly if the fitted parameters are near a constraint boundary. >>

```
{0.960949,801.84}
```

```
{fit3["AdjustedRSquared"],fit3["AIC"]}
```

FittedModel::constr: The property values {AIC} assume an unconstrained model. The results for these properties may not be valid, particularly if the fitted parameters are near a constraint boundary. >>

```
{0.961324,802.995}
```

```
fit2["ParameterTable"]
```

FittedModel::constr: The property values {ParameterTable} assume an unconstrained model. The results for these properties may not be valid, particularly if the fitted parameters are near a constraint boundary. >>

|    | Estimate    | Standard Error | t-Statistic | P-Value                   |
|----|-------------|----------------|-------------|---------------------------|
| k1 | 0.0492604   | 0.00684164     | 7.20009     | $6.17936 \times 10^{-10}$ |
| k3 | 0.000919984 | 0.0000867262   | 10.6079     | $4.63302 \times 10^{-16}$ |
| k4 | 0.00602799  | 0.00131074     | 4.59892     | 0.0000190351              |

k5 0.0751223 0.0103826 7.23539 5.33521\*10^-10

fit3["ParameterTable"]

FittedModel::constr: The property values {ParameterTable} assume an unconstrained model. The results for these properties may not be valid, particularly if the fitted parameters are near a constraint boundary. >>

|    | Estimate       | Standard Error | t-Statistic   | P-Value       |
|----|----------------|----------------|---------------|---------------|
| k1 | 0.05046        | 0.00726826     | 6.94252       | 2.04941*10^-9 |
| k2 | 5.86338*10^-13 | 0.00044419     | 1.32001*10^-9 | 1             |
| k3 | 0.00105621     | 0.000172783    | 6.11291       | 5.90299*10^-8 |
| k4 | 0.00500658     | 0.00141751     | 3.53196       | 0.000758116   |
| k5 | 0.0723124      | 0.010527       | 6.86926       | 2.7649*10^-9  |
| k6 | 0.000159408    | 0.000187043    | 0.852253      | 0.397156      |

```
Show[ListPlot[vn[[1]],PlotRange->Full,PlotLegends->{"blood","liver","gi"}],Plot[{fit3[1,t],fit3[2,t],fit3[3,t]},{t,0,1501},PlotRange->Full]
```

]

\\(\\*

GraphicsBox[{{}, {}],

{RGBColor[0.368417, 0.506779, 0.709798], PointSize[0.016666666666666666`], AbsoluteThickness[1.6], PointBox[CompressedData["

1:e]xTTMoPSmViYGCQAGIQDQEqDI9v5axhyUpzgPDtHIpmPpmYyVgM5Xs6MLtL

rwpbHArhNwQ6WNk/qz9p6QblhznImvKq7xF0hPKjHcxq+2PFIq0gflcEh88z

DyuU6ZhB+AeSHLIMd205YWYKIU91MCtzP3c7xwgn+4w5ZqifpAUlO+Q5cA8  
Uefv9RgDqHyOw54XXFZeBVC+Q75D4nX5bzXr9CH8BwUOp99PP7zmoy6Er1Dk  
0But/+sEM5S/oMRBufcAXxCbFoSfUOFw5177s3X26lD1NQ6u7kU/+a+qQs2r  
d5h5eqa+urMKhH+h0eHt3lmGNpOUIfyCdoeQHZyvFqgrQfgZExyWrmEXITJS  
gPAlpjw+z+0dvaQcDCXOhC94PhMh3PyxzYY2Ug6AABmymtO

"}],

{RGBColor[0.880722, 0.611041, 0.142051], PointSize[0.016666666666666666`],  
AbsoluteThickness[1.6], PointBox[CompressedData["

1:eJxTTMoPSmViYGCQAGIQDQEqDvsrv0oFSDs7QPh2Dtf+cmSwB6ZA+Z4OZxal  
/XOXz4fwGwldDMNXS5skFEH5YQ72c23Kfm4uhvKjHTTutK3JzC6B8B0SHH4s  
erTEdA2UfyDJYdJCySqpvTD5VifV00qmOPfD5NMd4ISPM06MhslnOWgcspGK  
FYTJ5zhoe0veVTsltc8h38EswsJz8mIo/0GBQ2nKbK7jQVC+QpFDwKtG15An  
UPcuKHHYyOzkju0D5SdUOJxds7QhxLkQqr7GIVchNudWTAHUvHqHI7l1vEHP  
8yD8C400OldmPZvrnwvhF7Q7+Lb7nf89NXPcz5jgUJmStHLJDWj4SUx1kNtZ  
XxY4NcHBXOpA9ILjMx3urC2L+1IZ4wAAEi5yCA==

"}],

{RGBColor[0.560181, 0.691569, 0.194885], PointSize[0.016666666666666666`],  
AbsoluteThickness[1.6], PointBox[CompressedData["

1:eJxTTMoPSmViYGCQAGIQDQEqDiprnURiH7s6QPh2DjnzbqY0hyRC+Z4OK2f+  
X6j1PwnCbwh0UNvKtvTe+2QoP8yhcgcn3b3bdVCg/2kHiuUjnuk9pEL5DgoPN  
q59Pil5kQvgHkhzWvlv0c611lLQ+1eFMoNnsu3UFUPI0h7cjma3ntlug8lkO  
S882zepeWAvVz3HgOv3yj+rLEqh8voNIZLaG6JZSCP9BgcPmdC35uyfLIHyF  
IgdZXYllCu4VEP6CEgeuWdbzn9VUQfgJFQ4HOa2rYzfvQtXXOKTrfG3/6N0A  
Na/eobBJlXfLrUYI/OKjg+SM038srZoh/IJ2h1MPJ/uxSLRB+BkTHC5bfjU/

Lt0J4UtMdfg4Q01wmX6Xg7nUgegFx2c6VBTqWEZ4dzkAAGLFds8=

"[]}, {}, {}, {}, {}.

{RGBColor[0.368417, 0.506779, 0.709798], AbsoluteThickness[1.6], Opacity[1.],  
LineBox[CompressedData["

1:eJwV1nc0FY4XAHD1JdmjhESyCqnIXvfaez3PMxJFKERmpLJ3mfVeRTRjiL9  
rCiSrGQ/SWRUMhKS+vX7657Pueeee869555z97n4Ety20tHRsW+ho/t/VF8e  
WPTjoIMB2C6eejcDP6ROIx4NpkEOKYiFNz0dw9sEA4qCv0H/a7X0w2lp2DWp  
QrwSvAnt4oNbxAOuYvKz1tIdnltR2ja1IbglGUv8/ZU+8m3DmX5nfddDSbi6  
1Kp7MZgNK3ev90fqx+NV++qpBxmcKBpzqUh4KRZzq9kLWDy58ZV6H7/s0xhs  
Dq0+PMS3C4dKWXkM3aLw/RD7MizwouHh36f07CjxWuVURV4rPyrzqVy64xCB  
LL/YNQKDBdEj+8mhtR2Xcl/DKboRs71Y0xLL2uQZhry00Y93MoTRuOrKYt9Q  
KEpqyD1k9BTBbynHHE9tBKPct9FttTaieOas+RNiYRCq3Y4/7aMlhizKTKMh  
PoFotjkq/Z5PApWlFhm3SfjkqTj+agL9fuzMo2/zEvZD5+Ny39UW9iOfYiMv  
ncQ59KuLf3avVRILat5uRFZ444WzcjtZVJ4ZaxfrIzbC6MFaUFMudKYoy4t  
MBp3Bq9fklM5FyyD1Q8sGBqfumOOD02WqMshPLGNo2PZzQ3zaPG/+8004303  
cu09MqdwNGf+Q07GEaytuFHGvHASx382p4Vsl0WBzScWvbMncMr8phbhsiwe  
4rbhlJhyxvk/OvcZPOVwLDpWlnDMEZdl/MQPH+TwpnSBbj/VAVefzNNX2xxF  
5oj8C8yK9kjnfNPdW0sez7T29Ih6kpC+0odXv1Ieiw8PWKSJ2CATH27bXhkF  
jDiiU1D2zRq5G+Yl3/EpotCPpbzZSivcxdsyXJSiiPOmk4yM5ZY04HszOY5e  
CV28Pe1GIy1QbK/uN5UFJYwL5PqZ8p8pHjjPn7PDXRlFtGnTtp7GKNM1b/5t  
RBkLPhZ3xcwYomL4zdl7rSp48FFPxa24Pqo0+Jy8oKGKc9HslaQJXYTDutZE  
MIVkPyLy+/RTHTT8MB/AmKuGS/qJTv1RWmiq1CL2cac6sm4t/6kZjWiVevN9  
TZI6qvZdW08QA3QAXSWfYA1k495wu/9UDQ/FS+XI/tRA1zji78bfKri1i5Nh

JUgTPfW6woZdlLF/16pX1YomKskYcZhOKGKhE603LAiw/vhC+6XQf3PJa1aB  
FUDi3JPKTQI5lFolWkaqIo5P8/R7zMrhH021St0axHBOEZPp/CM44/LEU+IX  
4sWTUv9p6xzG3rh9QttVtbDkULesuK0MUh9f65kN1UJm74xDPonSmN/JGPum  
WguznPoqtAclMWPpgnLxuhayXvvnq1AC/umv+SoqKNzxVKdmS2SKClUx+B  
UK2NCgKyvsghhqpRBtvk17WRjmPhkFufClrl1VTzqOhgeci+75tF+5C9Xebs  
aogOlglvOz9MEcb1b3eEh6p0UCB0svHp/r04ybWzr2ZNB6ey4tt7QBA7FeLj  
s5V1MXgX1zuhYAG8d+nsvHOVLhqIs4cNKvDhlbvjd7XWdPE+l2Psp9pdGPzS  
2kZUWQ9JLjzS5vY8eGL21XaGED28Iq6Zkse6E03YVKmfK/XQ/p6LTGofNyrK  
Fvu2rerhy7kE59YSLhS2ERZ9rKSPs5H0uny3OfFH9raks5X6KPawR9fSmg3H  
GkM1LFb18W/qmciqqyzYNvl14YiSAbYLxLHKTTLhs+0nHnCfN8DCV7EOv4nb  
8fbBd7Y/Kgww867/y0tj2zDBUp+l/6cBnk/atD4QzoD+gdX1lYqG6EkOu5ep  
QI/61FzxsApDdGksmbYd24JHxrmHHH8a4th//Hu10+lwn33cFU1FI8yddFli  
yPkL9AfWQTjYCD+GldtKNmzCdxPv5S0VRpg36K01uLkBw74f8j6tGKEEf/Cd  
VLtf0JjJcHipYIxSfwybDN+uwY0R5aaEcmPUa1j4XfZnBaL+FgZ6rhjJdmf9  
ucCqH+AtuveAqYIJqrOF3AqIWwaSQcaITJAJZru6RHp6LIGWF0MqR7kJgr69  
gazDIhxMDdFe/GGCxYlc74qOL8Cusi8rvfL/7pDT7Vf+x3mY+9XjSH5uih6h  
5sRnMV+gT0iPM+SHKfoIeS3NbM5CvXZVs728GeZzTNF5pM7AI3fp82qBZuhp  
oapRqjQNGUk5UoLPzXBfnJPVsZUpuPiEa+zPshlqSyQa7midBPfemPTxo+bl  
d4rT9G7hJ1Db7bV2v8wcn4YmkG4++ggte0ELRt/N0XWCJ27x7TiYFkbMfjey  
wMiHsePMdOPwPiB5/Lq7Bf6S69997OiyOKmTB9XuWaAv0TbBlimg0/R3uz/S  
LJDZrjriWuUIVH22mWxmtcRGZ4nWvwHDoFVyYvSMoSueWbjz8KbYIMTtcB9U  
d7fEeIjmWeGuAWg/79XHEW0Jed3K/1H4+oF99Fz3xF1L9Jt82OMn+R4IGNxR  
3mCJru60Aq6GfUB+ENaWQLPETJ6iN9cC38HI9siWYxuWWMXRH69X3AunepKp

W5SscDZv8ZmJVg88Ukiv6iNaYYbBUilZVjd8u0l+nu9vhSrLykuEP10g9yer  
9EKaFa7zFJRlDHCsMvdIrMnVljarvLZsuUt1LzKeyTcYYV8ab+Hkho74I9U  
0YPIWSuUt/7Vo9PxBuKXK7JvihPQZDFgqYG9HTpsqTe8dQg4x7HS0aTzGjip  
TdfgJAFblr66yMS2AVG4NY07nIBkupFXTL2tcCOm48pUNgFZupZX6iVbYXSm  
J6GqhoCNJcYWRcmvYJ/ZQEzyIAE1/tAdhNWX8Jhn4qLsTmtUkP/wY9dsC8yH  
TofQy1lju09zj3uffjg69jVwwMla6zyK145uNEOI9tK5x2etcWM8W/hoajNQ  
81a9LyVb4xerwLYFyWagY9k8bVlgjeNliqXmb16Aru9WN9FWa/QUNr+42/8F  
vFVi0/56KxHzKqzT+7qbgDub2z5bmlhOKr84h+KbgETHZ+OrScTxoMTpTJ0m  
uHVK0ErbkYh8Wmutjf81wVibiBnPBSJOddnXCrQ1gojMAaMZChEDdxi9d09r  
BI90Gb3aciI+5NIqP+PYCAv2yhonF4k4R6/P7b/ZAPL1GiryHDb4qTTilXZB  
A4SK6Cgwytg+o+I+HmHBqiPM5QdNrbBAIVvegHuBtj6xUym+LQNRk/zPg3p  
rAd9C2vjDgbDPUN1qCm1kNSmZ249QMbpKPPzL5Uw87LroKrn+wwZ3kTL09  
83VgN36av2PTBnPYZD11GusgW9eHJ1eAhH7l8Z7M5DoYfxTA5a9CQt9zFmYa  
vnUgxbhKpmdLQp6zhBsFjnVw2u8yE18QCUPmfkYIStdB8ftohi8ZJBxw8p3z  
ZquDJZXELfWlJEwtuXLRZ4kKijkpm2mdJjyozFpbG6JC4b0l+c4vJKR05oRY  
tFBBOJ/kzcJki77j64vdpVQgF9bcN5SwRRHPtKjjuVRgKRUaidWxRVfpfqX+  
VCpEPI/ibj5hi4tZV3/vjaLCz6rPRnSXbfljkyFcDAVvOqMIzWybHFCRNqn  
3osK401Pqi5U2SI/o9mDjy5UsHnFvVD53haZ32bOBh6jQnt78P6VJVu01xb9  
4GJDBewadpLjtEMDM3Z+iiUVyt9pkn1l7JBQJVn615QKUoP33hYZ22G8o4h4  
sjEV7oxuY5jzsEOurzGSB4yowPPRU31/rB26Hr9ObDWkQtJUZ8Cpe3aYsiZg  
6fAv/3dWrvBugx1+CPjyuvdffeA8eWjs1A43fieBqBkV5pZ+8e/5ZYe9n3Z+  
hn/9nVedrOx57TGMcExKkEiFvo0XCWR5e9zW/Di8xI4KxnT7G99Z2aP0c2fb  
r8ep0ECfvMrpa48HXB65tbtSQZ7p+yHzK/b43v6JP3pSoYDN2j25wB7FB19a

6vlRQYi78nbbK3vcYR5e2x1CBSaBcFadLQ4oouDXeDyRCpf3ftKJEHLAihMy  
tZYZVPghahBWp+aAzZK87cVZVBg7yDGnFOyAXJLHK1NKqGAtG7AvKNMBZ3KL  
f26roUKbwoDds1IH5Cav1/X+23eZZm7rwS///sQZBS3CCBUSLA8/3HfiGF52  
J10+z1IHcoEWJ1iMHdGyfOCTdVAdxNWm9o8J0iGPxaX9Gs718H3jfBhZwwkT  
S/KDKnzwU79hLD5cSdMUOdKVo+oB6m6I5512U4oN1Xv4XW3HrrqezazBJxx  
kcj+Wn2yHlg/JmYUsZ7AG2sx+bu9GoA0+ab6DPNJZA9PJXloNMLcnMX2SQZX  
JKSndE6bNMEvrd75PdXuyLafoeOkcjMk8Y7G3q/1xKMnBtjVVF+CwnJ1gl+h  
Dz7Rv6EhvbcV3FgT55qk/TDM9PXLgt420De2NuMnGYAkoydXxW+2g+97cVZd  
hiAMi3vRay3bARe71KeqB4Lx2r3oqMlnb+F1AoXc3xOCpTsITf56XcDsUeLN  
8/gCetQ6v3a27YZkehaBjYKLOL/8k/fRjh7Y/dAyPObOZXz49JmEyMseMC+X  
pL+hGoEc3t2ZZqd6oWS1Q75JORLVOe/mI/M7S0roPL8hHoVOMy1eO3PfAUPk  
kgTT/mj8LKRe9FOlDxiVWJ6eFo3BDq6Z02/e9EF0eJTZEHssHkcT0/Pm7yE3  
X4AkyB6Hhv4Uclj/e1Bw2eHn/zs0ORqKHtha9gNBiM6D/3M8PojNf3eguR84  
athfZ35KwIMK2ZdKVQdAfyZMY293ImaQ+XYVPRwAwZ/MQpe7k5Ax8JV1785B  
CGNIHTrUkYyqwQzdeGkQrPP98hcqrmAU5+tvt4cH4c2B4I+x5Vfx2vc7i1lq  
Q1CvPiRz8H4K3h88u904YwiUCLi2YldScWJ39uGWT0Pw6L7Nj/O6aThAPrrV  
TXkY/Ke1DNxr0vBg/r6Qr9HDwCoAlpqq6ag5P/X3S08wfKJ4TeQ8TUdRnX0q  
dHwjCpk6t8sjiQy0dvbbcsF+BGaj2ilZDzNwOi39ufHtEUivfkri3ZOJ4dYO  
asVDI8A0XvDmYnYmKtuMqbPzjYju/J5DybuYwJ77FsLwihQz9fzi6Rdwy10  
G9gZNwr0dn619ziuY6nQ0K3I2lFIjLT+XBh3HQ1UajW/zY1Cr3Tpn+Mb1zGF  
8/PsEV4afHkp+HY9lIyGMxFBXbo00CqoERNaIGOQ0fVOubM0qMplLJJZluOZ  
rMcXjv75CjI4VOMHGbc1aP5J96GBUPS8luMaGffObSQv+NLgl6OI8y06CrIN  
Br4o9KfBM86km7u4KPiYWH1ndwgNxELs2TnkKj7wdxsOIoGWT5514XkKcgv



uHMLjpoG3G7Lew4pUvDYfYGgwzE0oCNclTZTpeCedaY/0bE0oEk3GSZrU7Ct  
h11eOoEG5A8HohmtKZgTyqXof5UGbP1BzLw2FDTRHjy1O4UGMR0v0iVsKWjB  
oeP94p/9qx3v6B2joLa4IAN3Gg3MM9Pqol0pyGSU4lySQYOXiTTdTDcKFqoL  
E0mZNFcPkOq450FBb+74fZv/LHW2Zbjj4KH333RN750g7uuXC49Zynou7yS  
s/DPfA50s+O+FNSX/NZFJtMgzblw3IIfBRdhYEidQgNGg7XVvwEUzGCqoU78  
8/8AX3fQHw==

"]]},

{RGBColor[0.880722, 0.611041, 0.142051], AbsoluteThickness[1.6], Opacity[1.],  
LineBox[CompressedData["

1:eJwVIHk01Isbxt2yVApJZFchS1T23TMZ6t4KYYgr+xZZSbXnizZk30mLYii  
aKGyjNDtlpIWKSWUpMKNhLLzm98f73nP55/nvO9zvnNsdwu08lzDwcFRwZ7/  
b4Pptz+p/BzGMfKnr9PIdsYfM75Ufg8ZMP4jxejxap0GTrdL0m+GjBs/aH25  
skaGjBfDujZnQ5aNI6qYjmdWrZB2t61yi+8aHBg3niRvtcMdGk370zZu70ZP  
iSiZcMDsVBs5KmQTnOJ7vceWXJBuz/pyNVsAYw7jzUvn3VDI4rvB6yuIERkT  
urqkB6pEPU7SSEIILDm6P5rqieZw1p7ebcLQWW7J8/3shTe9fNPGkyLIHk2u  
Gtvlg2+6HjWlbalQUEgSzLQ/Ad4FPsPgEEmsVah2T0r2g4SDB0ffEWmM6Ppx  
diedhMhA/6eibBm8XtlL1Q7zh0x6kolN9HZkPpZZPecQAEVDtWs8vjtwsTLq  
QumeQKiN93M/oOzEqKfNKOYCoX85ySeAJIvyGvOuFlcgHFnuV36zTR4JETzf  
uXiosL2VlJ7MuQsjfmVNNRQqnI+r/dCf3IXaUs1zDwup8Nk0YPmjTwGtMo2m  
nl+ooDYm3S1uU0SxS6TSiDwNEf5qQrb3lGDWxz8a70FDvOQAsb5QGe01m17Q  
CmjIO6WmGxSignHTE6fF19FRoDjwYaebKo796svU0aGjdCBpqeflHkTTP8v6  
e9LxzKx0T6vEXmg/cy4fzqCjv2DiY0H2Xixv78p/XEvH40/mzLB1+1BedrIH  
Z4COL+b5JKvofSjOo9OdOYIxsWJSwuWrBmdT+9HDCMaUrajNx49q8LGULDp6  
PBiztyc4WRR1TM9kMBPCgrHE3VKd/VQdWaUfn6/NDgaHc77XSZIGysNm2oZv

BIOzNkDErFYDdtHMRPwTjPX85HZpFU3scglRVXkTDMGHE4rd27TQuMLxncx  
GMiLe9vntOC199vLWQ3EhAPzE9L5NTG+rjyVjEJAjJtAQYuEdpYXdzQvapE  
QFaaPK47qY0G6aVvQzoEFEJFC7Z46eAQTXBrtykBlRcT5uN9OrBaOLs0cJSA  
1un8yqI2XYyLiguHeRPQexvgGmGoh3DDgd3SVALGe8iCNvf0IFnpaLs5ggA5  
SbRZRVEfBsIbWo7FETj4cYLOU6iPVOdsk9UUAoe1W2Q/CRngp5WnHF8WgaMZ  
+W/qUw2QF+U6ns4kYYPstIDGXwxBvtjF+J14m4GBM1g4IMUSklPEQRwkB1SSl  
gn2/DTEo8fvciesE1rwQ4PpFGGFzvZq6+S0CPcKzfnW/jGD0I66vpopAhdPA  
q0jCGLmbRxxqqgnElDbrGv8yhqB6Vbsai4DSr11lrB4wLZoyZ91AQEi8fa17  
BHBBYR22PiSwYqRfS64H+q84J0c9IjDidttXfgEQvncwMqOZwKvE7Vlr9EhI  
rH5vaN1KoKE8t2s0nIQjV7d2dT4mUPacJ+Epi4QVwe//cLQTyJ6K0Lk1T8LP  
z+k+02yOEp7475zufqyUzLy7/oSAI55rYVD4fuQ1VryV7SBg6fTayoq1H1e0  
5Lj92KwXd4BbY34/dmtV3Y5ms2xpPWurrm2+MhwurOZr0PFfzbMBDMA/D/F  
2Dw/XiTTW2eCwJEpgxts/eHNQq/r50xQXrASL8Dm55pJSZd0yFgLuqo1+546  
+wW96DAyzt8byaC3ESg+5T/hXEdGaYJ9M539z9krq1dlc2QYPvnaTWH/G9Jq  
TdmpY4rjC4VF4i0EDm3Sa/haa4r01R8n7dl+ae27Fdg+awrnnFfFr9l+ylBk  
dpZrm2F9MZ1Pr4nAzCXuVP9aMzhclg221xP48E+4ocWsGWy9pttm6gi0D3+f  
3Kt9AAop4Z/4awlc3t1tN1NzADfLOz+I3CNg1lAoF1lzELkuzb3J5QTO9+k8  
Sq7+C+K363hz2HmKW60I9v31FzxktBy35BE4uVNa4bDmIbhfjvWYnk2A5MeV  
wV99CP6ve3np6QTGFrocGfcPw/DudW2eeAL6Yn5zJffMEVQSKpjtT6BlIj8  
84c5Ctx7l7n92HmuiBn5oWSBVUqNRYQPAScDxjv9YguIr+lKOLqz9e+49J84  
alks2YZIQXsCHl1pDX9oH8UX244oCplA+dahqH1C1ri+PdabIcb2q+DccuZz  
W3z9sKnZvi0YiQ8yej5I0iE+feX7pV3BGBuzWdfM5Y60ke8BljF0LJBeTUiw  
vOBKnenkHKUhVaQ/oeSBLzq5Nrm++4sGzWIWMrUiA00V1+QW7lPhuTF17JEy

FWJDMrQ+FSqCPsyNUBXpaPIpTEpCkLgG7mNZC527m0/SabLBCHqhcEX1tsQ  
+D1LFn1mHognyUxGT1cYVnsaxW5aBmCD952TW8sj0NvkFhbr5480Tl7xxRtR  
sNf/0B8eeRji1yxPnymKhk44Q477vB/MqxU5z+vFYDlKVP93hy/uzHZqPNKJ  
xaubP7etTJ9Aaufz0EW5ODQdoFBF1U6AK3ZKfv2ueDxo5BOS8PYBjzZvlc/O  
MxAvq2v5t9Qb8afjivTyJYAj03uHxbwXCsvEbSX5ElHqtTSZYeIFTbctVNpS  
Igzol87kF3rCSorDW/RrEtyPHx/j5fQEfz3fk5zPydBo0tMYdfGA2UikofTL  
FjhJmii3PnOH508NUtEvU/FQav7CDXV3RHJl9Kp2pqFNui7v0hU3WJdRyyZr  
zqKKk9YxIumGpwohnxKq01GwmJ/Qm+OKJoNeld0l5/Any0L/sIgrtK32UWTP  
ZqCA79t3ySsuuF5CmQklZ0JY6sVvKtKX0L6RDnjVZ6J4A8s/w9cZG8WNLY30  
slCjEq04J8YJn5l+QwVVWdDym4qovHkc0XmCbtfls7EsIKC+ZtgRo3EdzlvX  
spHi5MzM2+yILFaVrYhEDnyX1pwqt/4b6wdvPI26lAPPU7da0846sPtaQjVN  
LBejuafmzF7aoyG0SXRHZi4SU0Mf6svbg/MY9UEexfx6OXh10nqcfQ0qs9deK  
xDwU9ClfE++2wyvlypXji3kwvBZRF6hnh/9aJZ/NhzOgozhkb3TBFqQb9bJS  
kwyQ/h2cvr/eFnWFPDdVpPhYtZdWQY/HFnsZNuqGMwyE/tzleshpC6n4CZLj  
HAMCqZXjT1cpWHDc4XyBgwnPZ7dLRn5RcFcgNV94MxNJlY1a6kMUyIbZ8/Gr  
McGz49WFjQ8ouBhQmielwcT9+Udql+soEPScllDVYoJ7cVxWtYYCDqt05SN6  
TDjmtYgcraJgQPnRwbT9TKwbntK8WEYB46NCPI81E4eaU9ilQsGmHmKDCIWJ  
drv/TvVkUXCm898seTsmxmKqNvpNUEBjORaZ/s3EuwpNrYupFJjnZDbGuzNx  
Tfpq7WIMBa0pA+QcTyZihapqcqMpMlhR6iz2ZnN3DZ9qFAVK/i3vH/kxUd4R  
8sQ1lllr7pvduvyZYAgJ714KpmCbg9PoYCATzY1h3xg0CjltK4ImqUzML2Qt  
7guigOfA30wqnYmsGRufZ/4U/A/4EufS

"}}}

{RGBColor[0.560181, 0.691569, 0.194885], AbsoluteThickness[1.6], Opacity[1.],  
LineBox[CompressedData["

1:eJwVx3s4llkCx/HJ9aAokfslWaUpJJE05qdmpTayg4khJhIHYchIWXdmvGNy  
y7zZ3bChEhXK1qjN6vJYUm0WHWUo6UKSVIhM6/zxfb7PZ2VwDDNUjkKhxCz0  
/2/9+PgDV4NCp3C8LY1GneiD+S/rx3hSuqvF9mcV73SR+pdRfB3vHX3dD93D  
qa5r8HDY0TuPN09PLwxv8lVzgLCxrX55hBxaBcmdXlpbcSkuzuG5rhLuJ+a1  
nz8ETE+2MZJ5SyAmUyvN+hgQ+UleVhUtBct+Hydv2BXIEvUatQhNGO95dX2o  
xw23kyTWfborcLTZ2t86djd6+tQ/0id0QI03rB408MBrxw0/n2nTg6D/KWey  
cQ/UZtVph3lGCNNwOvze60cYsg9Qnrqb4N6DbsaEPBM60v7nFUWmsDP12NxR  
y4QlzbZaOcIMd1OlkoFhL9i+61e67rMKuvMBuz/yvOF0ih8e7WIOPjG3u0TO  
B+7z/dQeXQvk57jFf1ZmgXWBLxlorMZ2cas+J4OFoH22750mVmP56/Pt9dMs  
cP/gN55us4ShqYiyrvsvSn6ydYzlrYfUa3HkOX8/lK2X/rwq2AqiN10Fwit+  
OCPlf+11t8ZMp7YJTZWn/rLxwblig3D+bKi/U8fGuGx7pWKELSqiG1Ufd/lj  
kqXnPThoC9UdmZHNKwIwfXFcQeKzEewo9rFTvgGgBJUejHKxg+mEeUdPbwA0  
W8Yt/9G1x5NymU9vyz6s0Lnzp064PVQ14q6KpvhBIKZUmKPggLau7p/k1wXC  
3ITxznHCAabbnodyiwNhn1paX9HmiF3xMtlyVhDYdiZDNI8GwaCO2v/YHFjx  
15ZtmKlh6ryNMpXLgdzDpYqfE5zBy1f5YsvnoDZQ2nUsgY463/0b4hs5kDk7  
XWU0A5XMnPaVSvvhGdjNZEq2gWZ7dH6kaj8+/apEHLrqCgP2yc1f7gfDST9y  
pvKyBy5qsN9vlB2Afdnx+YIHLDxtOZmQOxKOnOv5vQNGgfAQJT1SOBWF0dE9  
/xlWDMFopEwhgRaLWZeucUPJQVRseNxx08sFodOfXXk9AmMWnrv1OuKx6aNE  
wK2NRuQrt6bnqQkIXZw72krlQptlMSSvkojYgZk3XMt49E/tP01aeQQxPd8t  
ZigmYNyz5pZk+VEkP9z6UvKYh89pPxltMcfQLiDFvY+OYIvr67M6T50hGnYp  
Svv8UQSfqCy1XpkCoYKawVxNMkSR3FrVhFToV3umZlWkQHd6yaF6dho8miwV  
Tm5Jw0apxMp7NA2XpjvtWjenI9ioz18rLR1E54PEue8yEMbs3ROklAHF9EkL

ldWZGJXjhJgUZUDZQa0hfFUW3ly5Fd2onYnM1Az3PvVslEt/cxcLM1F+1oBl  
pJ4Dvxp61S6lLGwKXs6N+5qDD8ohVx00Z4FpTAnTe8UH1W5py19Ps6DRrN5e  
/EKA8HhNg5M7suH65hjN5O9cTL2lCrTOZcNoStU45W8CI9S4Uc/FOTimmN9n  
1SmEo0NcaHJEDrzOcs90/J4HRbe3JrU3c3BvDe95dpMIYyol+41W8HFza9/6  
dZXH0XHEr9rlAB80zA0+5nn52PS+80DIC3ycq/T5lMgoQJlv1M7ZL3zEvXbZ  
cbC5AD90ubSpOQuw2lDu6bylEHmX/RcVZwnwgowcKmsohNgpdlnSbQFSSjSD  
z1kUoYr+4kyCTICRjA7yl+oihLCu1QuclEoaWDpGBZDribVY5ybC5VnNfeS  
fy1G5M3mZP3zuWDwDa2E+idQYRMsEw3k4kbiTT2zghNwLTEJW70EgIlv9/pp  
jRJoOQzIOdMI5KZ7varNKUHhKS3F0TACXdR62b65Evx3rHLiRj6Bt3eN7n9J  
EqOrbKjq7jUCLjXN5sYTYnT7XizUkRK4Vq5ct35SDI23S/hNC7YRe2+kfRLj  
wteevV4DBIwzx10CZsQQNTQJjw8Sma0wC/qZQsJp1J0mP0SgcSlRumIZCbMn  
TZ0vXxEwP+KnrmFLYrhD8Xb+BIFfos+UGNuRmLlmYWP5gYBm6EdDK3sS39/i  
JN1aMIUporpvlaG4xb7i0yQBKbXVTbiNRKLrluz9TEA8uCZT2YvErPZYp/Ys  
gSW9Cao6PiS+fbOT1S04q/NWocVeEpZe79UYcwTijAEV3/uTCHZ7cIP7lYBH  
ccEfmSEk2qceHr4nI3A3V8ooDiWxs9GZ2P+NwNa0tZ2nw0gMze9Knl7w2kN3  
nrRGknjy5wyWyTEbyHLgh8dIkGN9U25tmBdduDIxsgS3TPLXrjLCVHgWRs7  
wSVBs8kyf7Fg5R0z09/iSYz4Xtl2RF6IfwEP9zAU

"]]]]},

AspectRatio->0.6180339887498948,

Axes->{True, True},

AxesLabel->{None, None},

AxesOrigin->{0, 0},

DisplayFunction->Identity,

```

Frame->{{False, False}, {False, False}},
FrameLabel->{{None, None}, {None, None}},
FrameTicks->{{Automatic, Automatic}, {Automatic, Automatic}},
GridLines->{None, None},
GridLinesStyle->Directive[GrayLevel[0.5, 0.4]],
Method->{},
PlotRange->{{0, 1649.9066}, {0, 841.4180778}},
PlotRangeClipping->True,
PlotRangePadding->{{Scaled[0.02], Scaled[0.02]}, {Scaled[0.02], Scaled[0.05]}},
Ticks->{Automatic, Automatic}\) \!\(\^*

GraphicsBox[{{},

{RGBColor[0.368417, 0.506779, 0.709798], PointSize[0.6], AbsoluteThickness[1.6],
EdgeForm[{GrayLevel[0], Opacity[0.3]}]},

{RGBColor[0.368417, 0.506779, 0.709798], PointSize[0.6], AbsoluteThickness[1.6],
EdgeForm[{GrayLevel[0], Opacity[0.3]}]}, PointBox[NCache[{Scaled[{Rational[1, 2],
Rational[1, 2]}]}, {Scaled[{0.5, 0.5}]}]}]}},

AspectRatio->Full,

BaselinePosition->(Scaled[0.1] -> Baseline),

ImagePadding->Automatic,

ImageSize->{10, 10},

PlotRangePadding->None]\)      blood

\!\(\^*

GraphicsBox[{{},

{RGBColor[0.880722, 0.611041, 0.142051], PointSize[0.6], AbsoluteThickness[1.6],
EdgeForm[{GrayLevel[0], Opacity[0.3]}]},

```

```
{RGBColor[0.880722, 0.611041, 0.142051], PointSize[0.6], AbsoluteThickness[1.6],  
EdgeForm[{{GrayLevel[0], Opacity[0.3]}], PointBox[NCache[{Scaled[{Rational[1, 2],  
Rational[1, 2]}]}, {Scaled[{0.5, 0.5}]}]}]}],
```

AspectRatio->Full,

BaselinePosition->(Scaled[0.1] -> Baseline),

ImagePadding->Automatic,

ImageSize->{10, 10},

PlotRangePadding->None]) liver

\\(\\*

GraphicsBox[{{},

```
{RGBColor[0.560181, 0.691569, 0.194885], PointSize[0.6], AbsoluteThickness[1.6],  
EdgeForm[{{GrayLevel[0], Opacity[0.3]}],
```

```
{RGBColor[0.560181, 0.691569, 0.194885], PointSize[0.6], AbsoluteThickness[1.6],  
EdgeForm[{{GrayLevel[0], Opacity[0.3]}], PointBox[NCache[{Scaled[{Rational[1, 2],  
Rational[1, 2]}]}, {Scaled[{0.5, 0.5}]}]}]}],
```

AspectRatio->Full,

BaselinePosition->(Scaled[0.1] -> Baseline),

ImagePadding->Automatic,

ImageSize->{10, 10},

PlotRangePadding->None]) gi

```
.  
(*-----  
-----  
-----next mouse*)
```

```
vn=readTac["C:\\Users\\exx\\Downloads\\TbD120M7, Liver 3.872625, GI  
0.72925, ID 3404.csv"];
```

```
Lv=3.872625;
```

```
Gv=0.72925;
```

```
id=3404;
```

```
vn[[1]][[1]]
```

```
{{10,237.142},{30,191.033},{50,63.805},{70,38.3611},{90,32.4464},{110,28.6652},{  
130,25.799},{150,25.5731},{170,24.4225},{190,25.1506},{210,23.6294},{230,23.23  
95},{250,23.6331},{270,24.528},{290,25.848},{330,24.949},{390,24.8232},{450,25.  
5284},{510,27.0057},{570,26.6201},{750,24.8924},{1050,22.4111},{1350,22.062},{  
1649.91,21.4548}}
```

```
model= mouseModel[Lv,Gv,id,33]
```

```
ParametricFunction[\\!(\\*
```

```
GraphicsBox[RasterBox[{{179, 179, 179, 179, 179, 179, 179, 179, 179, 179, 179,  
179}, {179, 180, 180, 180, 179, 179, 179, 179, 179, 179, 179}, {179, 179, 180,  
179, 179, 248, 248, 178, 179, 179, 179, 179}, {179, 179, 180, 179, 179, 253, 248,  
179, 179, 179, 179, 179}, {179, 179, 179, 179, 179, 248, 248, 179, 179, 179, 179,  
179}, {179, 179, 248, 248, 248, 248, 248, 248, 248, 179, 179}, {179, 179, 248,  
248, 248, 248, 248, 248, 248, 179, 179}, {179, 179, 179, 179, 179, 248, 248,  
179, 179, 179, 179, 179}, {179, 180, 179, 179, 179, 252, 248, 179, 178, 179, 180,  
179}, {179, 180, 180, 179, 179, 248, 248, 179, 180, 180, 180, 179}, {179, 179, 179,  
179, 179, 179, 179, 179, 179, 179, 179}, {179, 179, 179, 179, 179, 179, 179,  
179, 179, 179, 179, 179}}, {{0, 0}, {12, 12}}, {0, 255},
```

```
ColorFunction->GrayLevel],
```

```
BaselinePosition->Bottom,
```

```
ImageSize->{12, 12},
```



PlotRange->{{0, 12}, {0, 12}}\)\ \!\(\\*

GraphicsBox[{{}, {},

{GrayLevel[0.55], AbsoluteThickness[1.5], Opacity[1.],  
LineBox[{{9.09090909090909\*^-8, 9.090909090884856\*^-8},  
{0.0874367476365131, 0.08197166587636243}, {0.18222810297558026`,  
0.1358255024317191}, {0.27073779576926765`, 0.13315455086535802`},  
{0.3575112797365835, 0.08143316377978886}, {0.4516394623155443, -  
0.007347854733426912}, {0.5394859823491253, -0.08816932746972758},  
{0.6346872009943513, -0.13787329990112937`}, {0.7281522108132057, -  
0.12816574147938434`}, {0.8153355580866803, -0.07001063326902106},  
{0.9098736039718, 0.02121659675083076}, {0.9999999090909091,  
0.10024804094746914`}}}],

{GrayLevel[0.55], AbsoluteThickness[1.5], Opacity[1.],  
LineBox[{{9.09090909090909\*^-8, 9.090909090880112\*^-8},  
{0.0874367476365131, 0.08090369567458766}, {0.18222810297558026`,  
0.12746559200130417`}, {0.27073779576926765`, 0.1116266937044405},  
{0.3575112797365835, 0.046963725126600256`}, {0.4516394623155443, -  
0.04509050859182233}, {0.5394859823491253, -0.11115559892361665`},  
{0.6346872009943513, -0.12642564594664163`}, {0.7281522108132057, -  
0.07740196037964171}, {0.8153355580866803, 0.004179083230780074},  
{0.9098736039718, 0.08937493944143977}, {0.9999999090909091,  
0.12834702174618903`}}}],

{GrayLevel[0.55], AbsoluteThickness[1.5], Opacity[1.],  
LineBox[{{9.09090909090909\*^-8, 9.090909090875369\*^-8},  
{0.0874367476365131, 0.07984396759533968}, {0.18222810297558026`,  
0.11939549826670079`}, {0.27073779576926765`, 0.09184904274707059},  
{0.3575112797365835, 0.017913117173780694`}, {0.4516394623155443, -  
0.07109962300031061}, {0.5394859823491253, -0.11717052830989395`},  
{0.6346872009943513, -0.09879571259704382}, {0.7281522108132057, -  
0.022693471356141894`}, {0.8153355580866803, 0.06128703302641453},  
{0.9098736039718, 0.11605625481609519`}, {0.9999999090909091,  
0.10415981267620744`}}}],

{GrayLevel[0.55], AbsoluteThickness[1.5], Opacity[1.],  
LineBox[{{9.09090909090909\*^-8, 9.090909090870287\*^-8},  
{0.0874367476365131, 0.07879243663407876}, {0.18222810297558026`,  
0.1116081822210312}, {0.27073779576926765`, 0.07372482040530459},  
{0.3575112797365835, -0.006267252216927747}, {0.4516394623155443, -  
0.08743897872291118}, {0.5394859823491253, -0.11109134853087661`},  
{0.6346872009943513, -0.06371549528296311}, {0.7281522108132057,  
0.02544576624054603}, {0.8153355580866803, 0.09464282937855747},

{0.9098736039718, 0.10731931496853601`}, {0.9999999090909091, 0.0516787429232188}}}],

{GrayLevel[0.55], AbsoluteThickness[1.5], Opacity[1.],  
LineBox[{{9.09090909090909\*^-8, 9.090909090865543\*^-8},  
{0.0874367476365131, 0.07774905743802465}, {0.18222810297558026`,  
0.10409673959866513`}, {0.27073779576926765`, 0.05716133039337165},  
{0.3575112797365835, -0.026084496726167965`}, {0.4516394623155443, -  
0.09591154799603378}, {0.5394859823491253, -0.09685594593277226},  
{0.6346872009943513, -0.02730376120671303}, {0.7281522108132057,  
0.061646715198529656`}, {0.8153355580866803, 0.1046634148537508},  
{0.9098736039718, 0.07509702498429204}, {0.9999999090909091, -  
0.006536873471333553}}}],

{GrayLevel[0.55], AbsoluteThickness[1.5], Opacity[1.],  
LineBox[{{9.09090909090909\*^-8, 9.0909090908608\*^-8},  
{0.0874367476365131, 0.07671378556951527}, {0.18222810297558026`,  
0.09685439581479163}, {0.27073779576926765`, 0.042069810325321415`},  
{0.3575112797365835, -0.042006785469922474`}, {0.4516394623155443, -  
0.09808544986431629}, {0.5394859823491253, -0.07760167026270944},  
{0.6346872009943513, 0.0063643674428021085`}, {0.7281522108132057,  
0.08405712128907425}, {0.8153355580866803, 0.09555213349985489},  
{0.9098736039718, 0.03202960165577907}, {0.9999999090909091, -  
0.054402034659985464`}}}],

AspectRatio->1,

Axes->{False, False},

AxesLabel->{None, None},

AxesOrigin->{0, 0},

Background->GrayLevel[0.93],

BaseStyle->{FontFamily -> "Arial"},

DisplayFunction->Identity,

Frame->{{True, True}, {True, True}},

FrameLabel->{{None, None}, {None, None}},

FrameStyle->Directive[Thickness[Tiny], GrayLevel[0.7]],

FrameTicks->{{None, None}, {None, None}},

GridLines->{None, None},  
 GridLinesStyle->Directive[GrayLevel[0.5, 0.4]],  
 ImageSize->{Automatic, 28.4375},  
 LabelStyle->{FontFamily -> "Arial"},  
 Method->{"ScalingFunctions" -> None},  
 PlotRange->{All, All},  
 PlotRangeClipping->True,  
 PlotRangePadding->{Automatic, Automatic},  
 Ticks->{Automatic, Automatic}] \) Expression: {Bl,Li,G}  
 Parameters: {k1,k2,k3,k4,k5,k6}

]

Manipulate[Show[ListPlot[vn[[1]],PlotRange->Full,PlotLegends->{"blood","liver","gi"}],Plot[Through[model[k1,k2,k3,k4,k5,k6][t]],{t,0,1500},PlotRange->Full,PlotLegends->{"Blood","Liver","Gi"}]],{k1,0.001`0.2`},{k2,0.0001`0.1`},{k3,1.`\*^-6,0.01`},{k4,0.001`0.2`},{k5,0.0001`0.01`},{k6,0.0001,0.01}]

Manipulate[Show[ListPlot[vn[[1]], PlotRange -> Full,  
 PlotLegends -> {"blood", "liver", "gi"}],  
 Plot[Through[model[k1, k2, k3, k4, k5, k6][t]], {t, 0, 1500},  
 PlotRange -> Full, PlotLegends -> {"Blood", "Liver", "Gi"}]],  
 {{k1, 0.132}, 0.001, 0.2}, {{k2, 0.0086}, 0.0001, 0.1},  
 {{k3, 0.00021}, 1.\*^-6, 0.01}, {{k4, 0.0052000000000000001}, 0.001, 0.2},

```
{{k5, 0.00578}, 0.0001, 0.01}, {{k6, 0.0016200000000000001}, 0.0001, 0.01}}
```

```
Clear[newmodel]
```

```
newmodel[k1_,k2_,k3_,k4_,k5_,k6_][i_,t_]:=Through[model[k1,k2,k3,k4,k5,k6][t],List][[i]]/;And@@NumericQ/@{k1,k2,k3,k4,k5,k6,i,t};
```

```
fit2=NonlinearModelFit[vn[[2]],{newmodel[k1,k2,k3,k4,k5,k6][i,t],{k1>=0},{k2==0},{k3>=0},{k4>=0},{k5>=0},{k6==0}},{{k1,0.005`},{k3,0.0008`},{k4,0.005`},{k5,0.003`},{i,t}}
```

NonlinearModelFit::eit: The algorithm does not converge to the tolerance of  $4.806217383937354 \times 10^{-6}$  in 500 iterations. The best estimated solution, with feasibility residual, KKT residual, or complementary residual of  $\{1.26871 \times 10^{-11}, 0.0000175999, 3.97538 \times 10^{-12}\}$ , is returned. >>

```
FittedModel[newmodel[0.0365632,0,0.00033003,0.00548481,5.86338*10^-13,0][i,t]]
```

```
Clear[k2,k6]
```

```
Clear[newmodel]
```

```
newmodel[k1_,k2_,k3_,k4_,k5_,k6_][i_,t_]:=Through[model[k1,k2,k3,k4,k5,k6][t],List][[i]]/;And@@NumericQ/@{k1,k2,k3,k4,k5,k6,i,t};
```

```
fit3=NonlinearModelFit[vn[[2]],{newmodel[k1,k2,k3,k4,k5,k6][i,t],{k1>=0},{k2>=0},{k3>=0},{k4>=0},{k5>=0},{k6>=0}},{{k1,0.13`},{k2,0.0082},{k3,0.00024`},{k4,0.005`},{k5,0.006`},{k6,0.0016}},{i,t}}
```

NonlinearModelFit::eit: The algorithm does not converge to the tolerance of  $4.806217383937354 \times 10^{-6}$  in 500 iterations. The best estimated solution, with feasibility residual, KKT residual, or complementary residual of  $\{8.06436 \times 10^{-14}, 0.0000468401, 2.37739 \times 10^{-14}\}$ , is returned. >>

```
FittedModel[newmodel[0.0407689,5.86338*10^-13,<<22>>,<<22>>,0.0601942,0.00102167][i,t]]
```

```
{fit2["AdjustedRSquared"],fit2["AIC"]}
```

FittedModel::constr: The property values {AIC} assume an unconstrained model. The results for these properties may not be valid, particularly if the fitted parameters are near a constraint boundary. >>

{0.700334,906.453}

fit3["AdjustedRSquared"],fit3["AIC"]}

FittedModel::constr: The property values {AIC} assume an unconstrained model. The results for these properties may not be valid, particularly if the fitted parameters are near a constraint boundary. >>

{0.95762,767.472}

fit2["ParameterTable"]

FittedModel::constr: The property values {ParameterTable} assume an unconstrained model. The results for these properties may not be valid, particularly if the fitted parameters are near a constraint boundary. >>

|    | Estimate                  | Standard Error | t-Statistic               | P-Value   |
|----|---------------------------|----------------|---------------------------|-----------|
| k1 | 0.0365632                 | 0.0338509      | 1.08013                   | 0.283903  |
| k3 | 0.00033003                | 0.000152775    | 2.16023                   | 0.0342822 |
| k4 | 0.00548481                | 0.00491272     | 1.11645                   | 0.268159  |
| k5 | 5.86338*10 <sup>-13</sup> | 0.00753863     | 7.77777*10 <sup>-11</sup> | 1         |

fit3["ParameterTable"]

FittedModel::constr: The property values {ParameterTable} assume an unconstrained model. The results for these properties may not be valid, particularly if the fitted parameters are near a constraint boundary. >>

|    | Estimate                  | Standard Error | t-Statistic              | P-Value                   |
|----|---------------------------|----------------|--------------------------|---------------------------|
| k1 | 0.0407689                 | 0.0045419      | 8.97618                  | 4.79357*10 <sup>-13</sup> |
| k2 | 5.86338*10 <sup>-13</sup> | 0.000202692    | 2.89275*10 <sup>-9</sup> | 1                         |
| k3 | 0.000312406               | 0.0000984223   | 3.17414                  | 0.00228339                |
| k4 | 0.00233357                | 0.000557248    | 4.18766                  | 0.0000853257              |

|    |            |             |         |                |
|----|------------|-------------|---------|----------------|
| k5 | 0.0601942  | 0.00681155  | 8.83707 | 8.47126*10^-13 |
| k6 | 0.00102167 | 0.000509145 | 2.00664 | 0.0488876      |

```
Show[ListPlot[vn[[1]],PlotRange->Full,PlotLegends-  
>{"blood","liver","gi"}],Plot[{fit2[1,t],fit2[2,t],fit2[3,t]},{t,0,1501},PlotRange->Full]  
]
```

```
\\(\^*
```

```
GraphicsBox[{{}, {},
```

```
{RGBColor[0.368417, 0.506779, 0.709798], PointSize[0.016666666666666666`],  
AbsoluteThickness[1.6], PointBox[CompressedData["
```

```
1:eJxTTMoPSmViYGCQAGIQDQEqDndv8k7sXJLrAOHbOfw9eW4i98N0KN/T4XrL
```

```
1Sucz/0h/IZAh5cuR45a6DlD+WE03D1sViqWDIB+tMPDH/kz3FfZQPgOCQ6v
```

```
5E9kdZyxhPAPJDnEula93DIjyndIdXDr54hWy7GAyqc7lN3QPtmrBpPPcrjn
```

```
x6kqv9AcKp/joMqeYeRnC+U75DsYdm2OEV0E5T8ocChc+EtBrx1qnkKRw7Jt
```

```
5jmSN6HmLShxMDh8q/jLJ6h8QoVDaZ/z172XYOprHKI55Z2c26HqH9Q7s07c
```

```
sr6M0RrCv9DokO+p/2zfPCslv6Dd4deprPCSJ1D9GRMcWHf9K7PJNIPwJaY6
```

```
3E4lrX7Ab+ZgLnUgesHxmQ5PPRZy55WYOgAA9BlwfQ==
```

```
"]}],
```

```
{RGBColor[0.880722, 0.611041, 0.142051], PointSize[0.016666666666666666`],  
AbsoluteThickness[1.6], PointBox[CompressedData["
```

```
1:eJxTTMoPSmViYGCQAGIQDQEqDvrPGFTcRdwclHw7h8f/XyYelkuD8j0dSnpK
```

```
d2vUF0D4DYEocS+PsV68UQTlhzm4Gq9Kr9EsgfKjHZ5/M+ed9g3Kd0hw8D+/  
e6NDeimEfyDJ4b3b1dTnL6F8h1SHpKPxnh5WZVD5dlemy4Wvj8RC+Q5ZDr93
```

vDIW2AmTz3HoOimd4DYPJp/vMO/5l8RFs6H8BwUOoexdmRu0QvkKRQ7z99SV  
H9wE5S8ocfjkZGXTUgHlJ1Q4KP9Xv3VBFqa+xmG3/qH8uF1Q9z2od7BTqXnv  
bwTIX2h00BnOpLmxHeq/gnYH1VRH8cd3oOGRMcHhzf2vM4VjoOElMdXh1AFG  
3bn+0Q7mUgeiFxyf6fAwUv2y75QMBwAONnnu

"[]},

{RGBColor[0.560181, 0.691569, 0.194885], PointSize[0.016666666666666666`],  
AbsoluteThickness[1.6], PointBox[CompressedData["

1:e]xTTMoPSmViYGCQAGIQDQEqDioH6g7tEDBxgPDtHJ6XNrF6/o2A8j0djiz3  
WvqyOxbCbwh0WCjA2D5BIgHKD3PQmF3U+j06EcqPdvC4ZdS62TYJwndIcGh+  
7z57y9JkCP9AksOcf+6Mtg4pUPIUh/ORG+ap+KRC5dMdet3s1v+wS4PKZzkc  
fMgqqDkvHSqf47CYg2VqT1cmVD7fwfvck2/LmqH8BwUONW2nW5f2ZkH4CkUO  
B903Z2zYmA3hLyhxMLQrXMrckAvhJ1Q4bC/I2sgaWQBvX+PwVXaTufvOQqh5  
9Q53ziVbnnteBOffaHRYb169MXFnMYRf007w1kuNqaAAqj5jgkPs1F8Zx21L  
IHjYqQ6Ry09913IV7mAudSB6wfGZDkc4Hl5MK6xwAAC/4Hbr

"[]}, {}, {}, {}, {},

{RGBColor[0.368417, 0.506779, 0.709798], AbsoluteThickness[1.6], Opacity[1.],  
LineBox[CompressedData["

1:e]wUV3c8le8bRkg2RTIKySaUkXrf96ZIovBFRLKtKb330jgOx06lUoTITFad  
Y2ckJDvJiow4RkLRz++v93N97nFd9/g8z/sIWbsa2NFQUVF501NR/f97YX1o  
1Z2NCnvbYdFW/eAOfCN+L1vy+Yq9K+gvmzl1B0LbBTxf+fzEKmrKD2IX2kPP  
zDlDgs8uFlciXJAYzAe/19ouBfmwQIfPUYffSraQYFr7PTeFHVKHJliaPtvA  
01rWl0yOnBDaeumRp4cNNPvXnh7h4Qad30l69m+sgWmHFfHyEQAT8083iHpW  
wH/TluqL7gmo7InHp/+xhKNfxyazUwQB+Ww5eKHAEiQQhRcHHYVB4l1lxjV6  
S9DdHZMa4BGF9va/P/Rf3oL0YIVzbj4ycG/Xomvrjik8kfn68KS1LChmPNe5

smgCeV9j/g7qngbkyKGBXTcTGHuy/O1JihxUFX4/ahN5A5b3LubQOSpAq33g  
6R9NRrBmfMzw2zcF6K6hZPGZGMHvkmXaWqMzoK7XRG02YghUtx/YO6udBXqj  
AzWDJw2Bs35Z4jOPEhSvnPOqyDEA7qMto68SIYD6/pyyipYB8Lk+iMfRKgNT  
v4dw6LI+iJy49PMcRRkwl90hMqAPSqEPyrLbzsGXRi5B7eXrcB07pHzPB4Fn  
CfpLmaZXQTZG8on8Jglho+nxCu3aQNPDTvflGwV+LrF7n85pQ5HF175Abwxy  
HHhWxk9dgT30fPWlOoDck7ylMScuww/rEkfRHYD3Xim+D3M1oQ8ndJxBVQ30  
gi9ZqEprQn73wegPtWog35brv6iuAXoW/QYGteowfcbSpJxwEVQjLtOf3VaH  
w33Ud5tFlOjIXl0t17mLcPHcyH+7ZHXY/pktOFJzEQTaRORJ22rwPNhl+XbN  
JejvCbqBxABsZNHjXao1QYdxRipn7TyMN/gj139rQoP0+SRWi/PQPrNEkVO+  
DAESg8JJXarwWPrzjY2qy/BuWpWYXnEONN89PRVYpQUL5UeSFrKVQW6Cc8R8  
UwvilU7E6ZxUBl5aHAFVugKPH/UNahcowcpV53XqqisgqH1B+HutImR+UWmM  
faMN11Y10o/snIGIf0Vejr+0wcDmUc8E8Qw4nzwhrqN4FfjytoWnxM6AmhMd  
ke3NVZakFAcZWijAws4n84xKHfCK5gqtmZaD87x0WzmvR0GUDDmCligNLVPe  
lCsr1wCBnm5xamnQKQr7sSj5HdzLzBZYfKTA4kLG8Pnn1+FJzMfKyTuSoFZq  
OXZXS8kfiRe1XIUB9xh++EL9npA/u/Gc+pVMej0depni9KDl1u/b3lFiIEB  
+HS9qdeDFjc7PF+qKNh+in9HrawP2/5pVz2+iUCBYnJNv6E+HG7Aibb4isDP  
BxmV+R76QO/K28fDKQI+1s9e6ZboAw+zc8EznZMQs16V9eCUAaf9Y9STHRaC  
Qq6plPkj/8EjDh2qDxHHYdl/zo9W4T+YTJgav7AoAGfGl7yGrv8HX6tw1U+M  
BeBd3m/n4Pj/wOCu7caWIj98VGa51UFjCC0y9JwELl7gzOI0zRI0hle6xtM7  
qcfAmIrHyBU1hAwc2WXpyDEYbxfW5QowhDL+qyVix3mAYqqCWK0aQn5LYHCN  
DjecJSPnZrIZQVdf74j1r1zgL3xR8aCMEZxOzqY2dOcCmkVdmWIHI7ixuDBl  
/uQIHA6yEdj+ZgTape8MvdkPg9KTxN2kbnMI66itvKXDDkXP1852LxqD9Z4+  
969tNhDMN3ZmOnQDXl+mBJyxYAOmsuNfoi/egOGOLEfcaVaYaCypCai5AeFV



Ll/+rjOB0XtOSvXADcivPu034kJ0jt9xH6t3YDpb9niF2cZ4c1nNMNVxgRa  
+1xMKqcOAF57t6ftcxOQr07/mL51EP7NKxQ9qzeBKKbiyb7Ig+C1nDE1PmYC  
To/snLQ4DsLt3xb6pkdNYUbxiv1rBXo4e2hF9hrBFP7wfsuzT6SFcWm2BWWf  
m/BLMTOuPpsa/pP3FPJOvQlvdx8dm9KmhnbFIZOKspvgXTs4mLdJBa/Rp23S  
izfB7CSn0JYBFcTqnX4hZGkGjy9oHnx/fg/bNUwdsWG2g4+TCR/CC3YxD9Pf  
h7MemkFhpdUkl88udsu6PoJ7wAzS2XOF9f79wRS8rlsyaZvDyWpZScWf21i+  
3+v7WnfMocOG2Wfx3jbGH3y0JzrKHBhah7cZ1rewg7hvCFW90Qz8PSuhQ70F  
jd135ft15haM6YuyvTm/ieHeEgfHBSwgPcak6zv70rbyxzcwA7GAmeSPXy68  
WsNMLlgKXrtlAU3HvFPyr6xhkiQ5R1KWbBzw5F0j4FexHvKn3Ud8t4Eh6UmQ  
80kKpvKv9vl/52+DVTsngHvWCvYce36Zyew25GqHP0r4tYx5NXgkBzy8DY9v  
bDw9VPETY56MS3nFbAl1M0aaHAaLGFdv2cbyW8INLkXn/sYFzFvIQ9IW2hLS  
yxpJyWcXsHGm2N80pbA9nZR5q3wPFY+JSkaH28J7bTnJ/kF5zDjmQ+1dxmt  
4Nfk5hWO1GkMTwsEDV4rkL6gZlgnNY3Vi1RaCElagWl8J1f0+ylM3C7rwMgV  
K/gqlrqoRzOF/fnurKsVZwXxTy8uPUyewOToJ0+IPLAct2wTT2HVCcxW1Gjt  
X4EVNKpx1q20f8067ZH71e1WQBfpRNURNI5lz7FMijYg+xMqlMm8xjWfzDi  
NQ2PNVQvWV+M8vuCHRLfjB4XswbzX/GHQ+ZGMQ+HccmMy9Yg+blPxKR7BNOY  
L/Gii7EGw8695X+kiWxh4TrDDJ0NLCyPN73h6cc0N+YXy47YwHMco0/2m8/Y  
893InuCTNvCdmDDrafgZM2OvyTiqZgO3FcTTiu/3YV2KgqeuBtnA3dPS0h5n  
PmHiWB0DT7wNtlcv6OeM92JRWoZLMw9sQDe07ZdPfc+GmMW+Dqm2gW2hkUft  
n3uwkjCKWsWaDcz9yRvccv+IMeLxp0KpbeFc+d+fnRNdmH2qyCEddlt48CAr  
465BF3Yiz6T3u4wtNDz+KNCPfMCSPjRYHLtrC4XMw4uTZzowD+7kwLBvtkA1  
/Yp00aUV6z4hdVt32RYOGW95L4q1YpISreq8u7bw+eiVU1n1Ldj0+e1DlBx2  
kPjmHePjWbM0Moqc87IDqoefs5/7NOElTn+Cay0tYOVuLavqXxNGLNX+u1w

TztgatW9frWpEWvFdYjyJdtB3gImPHakEVN6Jf/mWpcd9PJZeCg8qsdS3nzi  
5PtiB7xp/PZm/8jYMtku6Me8HQgndrNE2ZOx/E8PLkYctAe2+9nPshASxvOb  
uu+Nuj1oLdD9tmF5i+2o9S3z19qDOYeLVIJYNaZ3V/aQWlc9kDt3WleKqrC8  
JPxJ+RF7eM+TbTmrUIX9903dRGPbHuo+CvoZab3BXgW9bnQ5dwc8vHiyBoiv  
MZpctjHfK3cg6NZ4nZ3Ya8zkg9NmuOkdYFkT3DnZWIHR8YpIZfjfgSzL5Qs7  
O+WYRXVaGrn2DrDKWtX04cqwynFKSXvHHUCk0/wyZMswRnrdrj6RO+DCabBq  
U1aKVRvS7c1u34EB8eWDSVYIGPua9x02VQfY815+V79UhDVJ31C1rHOA75Qj  
DcT7+RiP4WtDx04HuBD8+tSDY/nYvUA2V69RB/hY2FN88UkextfZlh074wDs  
L7JPaZS+wLzuqLCUq94F/Hktdf/lHKwzMU3srfZdMLq4usOSIYMJVlHUWm/e  
hXPwYmaULwf7SPvSZyTgLhh/TR9c0X+OiT4/NkH99i7k0rq1tA1mY0Ed3jtM  
H+5C58Iqy0RQNtZH+XSE+8tdUOA+9mpIJBsLxfBXJP/chUEeweWQjSfY8NhO  
hcF5R3DSMvcf9MzC8EfHonPeOkKKSf3PokOZ2HbiHMn6gyMsrW4+LYi/jznQ  
r/8S+uIt1201s6x38c0fh2yz95xBJZnRXSTghkY1WdlzcfnnOCB2NO1CYs0  
7J72xRDzK06wlnJ6kWsjFfvaeK2Kz9QJvp82xwfGp2J1ZXaiD/2cgFrsGPay  
IQXzTkylv1/tBCzXROL1LiZjM3RPUeM2JzgjKft+ZGEGQX+nANOYE/Q32l  
eFISJufcOJu66QsBwzulCe1EbOHKyvskRWdQOCpxGlnPwCzprsbGx+/jN2aM  
SR9ise4g4/orzc7A8fd3YPKVWAzZsPrN8NkZHpbecT3fGYPxTvvdilzhnvZ  
0W8NP+OwgYa8y1HyLuCielle7kA0dkmlIvSimgv8jrmay5AehVWUkqpp9F1A  
hYkRLyQRhSU96RcLd3OBmWHq+O83IjHtlBqGkFIXuKnErRDfHY7VrrMAUu8C  
uJ7qSXn3cEzc6Zjf324XEJ8LP9nEFY7R3ZT7EbDsAgOtSp+9bM0wBmWldl+Z  
e7A08ur8WdkQTHG9Nta96B6s9OSORqf6Y13/LX4SqrsHbnvbMmbc/ph1JT9f  
X/s90Jf0m0p/5IcleocWK8zegyotyX/Mxb7Yj9+X+tYFXcH/npkGacEbCzHx  
4cs97QoDX5bnAkK9sS01+baGqCslaec1uD2xtQCGH9XmrnClymdlyNXvLCH

f3v4fDJcoT1W+9RWmwcmd4vaTvSFK2AWp3rYnT2w9ySFksHXrpB8NIZ4gcMD  
Ww9JB+VPrpDyJcKLZO2O5YUVK/ylc9u/H159ZOZxw6gOeN4ggRuYSnbn0h3  
wq6+Zgri0nKD7xmyZGFWJyzDJjfb5bobyFmJq76Lc8SkWwbmBSzc4NfvYeeQ  
2LuYabRKUEigG/h/ofh9e34Hy1X8lD0Y4QZBXCACZ07fwSjf77bK4t0gPWf6  
91uSPYbTfMT6LdMNug6uHdGYtMMqDu5lY1VuwEBVycWvZovtVme03ift61uk  
06Uat8G0HE4vrLS4wY/GJNeOIBvsW7vlmezPbjAvURU2VW+NMeObW6lW3cC2  
GPlw3swKs20OW2iUcocWnl8WbPW3sJIPEYU1Z9whttGdw1DoFraJD3IsPe80  
lNb56DGcOYY75LaQddUd3PIYcnzNzLA8+hsLvk7uYEScl2eTMMWWW/UK73m6  
Q3PhIb/CHBNMKVrb0S7QHVKYd8wPCplgbQfQBYN4d5AT13/XeflG9oPq1IJM  
kTsUXT8azahlhMk1HC8Uee00FX8njBSHDDG/UB5Hvrfu4MS1bFrtYlGx7DEt  
MHxwBxe/V9wJKf9hEn/W5qcX3MGns0jqFJUB5virYf6BpAe4tbBbBXpewyoq  
614mKXhAoGzQUdo+XWzHs/JujKoHkGUduqfP6GLxa/nzXtoecKamTdGeWgd7  
tZI4f93RAwrMPIYUNF7BNkpiX2p6eMD3aTtFvnNXsAv3lu4iAR7AQsQXWL7W  
wrqWvOcl8R4wscXwTqTsMvZz3nyertADzp+KOHusQwNTem88m+5B3h9C7iR  
YaSBhTjo3V2v9QCX2zh//5lLGOvcxfmJDg+4duXYG+TQJUx2RnL+7bwHpB5L  
mjj0Ucfcxrd+uEt4QjLLcPxJaQzTSYmWn5TzBHeTr6YNySgmrskZoKfiCWmB  
vgom0wg2USzFdPqyJ1CZvjVS7b+A6QVbyCzZeoJt8mdJk5eqmLT8oreZsyeE  
BzHbXj6lijF89yV3eu7bNwXd3+ecwXP0kq+/jPAE5IBTERSoYHL8Le722Z6g  
5XUVR/6ohDH36tUN5HuCfGI6Tbu5EvYj8iuNRqknnL9Nf4ZqWRHLXtxMPUn2  
BjNw5Yp+bkWM/a1E1cQXT1j4NQabYWcwiilx5+ZRL8g3ZWj3KZHDulj4L3Ye  
9wL79XrqfjM5rKCxIP6cqBdIVHbaf2CUwywlmvh5FL1Ay12C+/OoLNa7tYEO  
GHIB7y05Hc44aezVq/CYSze9YNyGVvftHyks1pK197WVfxT88HITcJfCoF3M  
KsXNC77c7dcZs5HEyu7fjLye6AV/s5paKHfEMcLVuQ/kdC+ocRWPZ10Rwxz+

eR6RfewFrWev/hflJ4YJ3kl4wfzKCzTYcHaXU0SxJKWGto4OL/jQ2Zb27ZsI  
5jpwivkSnTcsHGE3uD8qhJnl46cTmL0hLC3qyXSkEAYJy3VDh72BhfM7V7+s  
EMauUX3XSdgbnh4vdQuJE8TKKrXa9m8RaMjdULz9/DiWyV78ZEzTG9LpY1uJ  
LMexMGcOH9Fr3rCYHeOUHiiA6YuMitSZe0PuPI/0wm1+bC3VKWLS3xuEq54N  
gxYvNrrSYyoV7g227yu9nrUfw5qunpX3jvUGp5nuOKerx7DUA7vfG057g1+X  
yAFGEx7srGcillfpDWq3Bjz/I3BjPgbIWyHL3nD3q9+SmclhzKKEq7f9lzcU  
q7Jqu+xwYpqMAfmcu95Q+jORcOkJJ3a0Sd04j8kHbPk9/yK4yIHVyPe//iju  
A9LEMJ6WTHYs00El/qicDxhvzTOIa7FjsfNZ1lbKpuDHJIEiscaGmTyz4/il  
4QOJn75sDJJZsW323/f4bXxgsmG5LjCAGZtyNt00d/QBDb3bfmcoTFhne71A  
mbsP6DoaFeAcmlCHYbFdF8N8YDdD48YHS0ZMIXJM0umxD6wlfvz84h4DFtRz  
4XvtkA/MzooyC23SYlaqNCbPv/nA4EGxE20xtJjmi7ZO/JwP1OV3fyzho8U4  
Ag3KzH77gGWbW/1h7QNYnqhD4C63L/x5WunA10CNxSfLLH8/7gviArptOdbU  
mNvfNctuUV/QyLBFeA9SY6p9wZpPIXzh/bPz3gVGVFhPcCqHmrEvYFpursbs  
e2jID5MoCQtfqLvitM7osYs+/O/4bw57XwiOWwv5M/gXtZV40TbI7Qtj00p7  
o/APutVPzo9K9wXh3NdRht7bqLD0AtLe7ws+q8uzp4m/0IP3S8vKxnwh/Fit  
Vp7AL3SJ2vvkgxlf6NsilLqVbKDVQ/8YHDd84VmX9buBwXVUJ5Krn+mIH2gZ  
ISdL1NZQ+eVRzQ0+Pwhr/rCbPLmKcptm146d9IPRtmjEI3IVnZSVelp8xg9M  
IxL4/3ZRUI9RcLz+nx9EprcY0C0to2Ya9F+Vzfwgm/Gn8ukryyiUfbguaOMH  
4/FsP169/Iky4YwVVz38wN+NR8fBawnNlnemSk3xg5AvGYfITy+gHbH3MwY/  
+QEd1emTD6VnUfUfK8nKI36gLJu9mVb/HX13WSshc8IPVFJuDjwz/I6W0G9H  
3lzxA/7cw8Gfo2bQIKib7uPM/hD+e1rp+d8plGmmwhk74g+PpK2IF590oVEX  
mRyy+fxhnO3nzYqLU6gPzTsLa0l/SDcuZhtInkRvhgnozF72h4/8ytdV1CfQ  
z9+8L1++7g9Wm0LY45lvqA7WrV5g7A9GszNDQ5e/oeheyDIHO39ouklJlJ86

jgoHTYguR/gDdYllwuHhL+iCbw71Jskfnpv/Lm0bGkJthv78NW71hyUTc+ID  
6yF0TMIwq7prn1/cLKxoZRDt/kW74v/FH3w0j1fdYh9EKzztx3a3/EEU7t2q  
cuxHpT6ThyyoAsDvpY25Nn0/mqtW9HP9wQAoXuM17Mr5jGastnWEcwfAgRRJ  
8J3pQwNcJarpzgYAPfW1eK/AT+h6d3iF/fkAkLTv64089Ql1lh0tbIPfj4/u  
OXP+Uy9q8ROfG6cfABxWRNtQmV5U3WkpmcU1AAJGLif3UT6ijHdKnbkKA2CH  
GCTGktOBhg04HOCqCADcYRq/WN4OdPOi8MMjdQFQ/bvkyXhaOzolmN52uDMA  
XPEIYSy5Da0bDRDmXAIAD562NfZFrajclb01HGsbQPgon06l0ormVf+8zrET  
AjdDz7L/ed+CpqRZBrMzBgjvPUF9frEZdbymOcwqGQijqcEhwXpN6MS7f/dY  
FQLh9lnVzo3lRtRYqpaOVTUQtizP+vsSG1F1BukzLNqBUL4ovus52IDyNnEk  
MjkGgroRG/25TTLaqfj1IkNhIHQvVJOSpOpQyM0YPVgRCEkuH0PWn9aiVZx6  
7gfrAuF9dfV3ua016POVpif0nYHQqzr3glm1Bg14WbBNuxAINqfqdCl8VSjl  
qHUS7Vog1LCErAy9eIPa4/jEaHcCgX25R1BV4Q1qYJNoelAxCI6e3hFFDspR  
SQGvUmrJIagcc/PcKK5As+NlNKKvgoBS8uqipXYFyr0z00alGgR/X550mP1R  
jtIMmTJSaQeB4A2UwCFdjo4mYXZ7d4Pg2sWsi4YppWg8LRPfn5dBMMxPXRFX  
Xliy8mXBQHkQGOLIX7aFCtEkeRn70togWH49OKz/4CWaZnG93KYjCPjuRa2G  
JBWgWTWpl7t+BIHWVC+f4tM89HiPiEseJQj4KbdvX5XIQ70/v0kj2woCJ40s  
0+43L9AXnMNfzzIEQ+/hJnnSQc5a4szv9VgsGH78tzh0Si4HIYssfub70his  
UoOsWLueoxUP0Hp95WAI7g/MpXF8jla/t2SkvxwMl5/e4Z4reoY2CL7Ivmcf  
DN7yTnMEzWy0r1/ml/YiGCh5cj62jx+hhovktWPFwTCjXB5px/IIHaTW49mo  
DAb2byOcEPYQ/SLrYVPQEgzKpvDQ8N4DdCa2apt9Jhjbknj6x3vo/ZPL59Y  
XNyPp6qZ1KNkoD/eDF9qXQ+GTsKpSCu/DPTn1A7R/0AI1F1ujvlMTEc3L2Ci  
U8IhsFH4uZ88mor6/dd79Z1kCPxdV6lh9UxFd+5auWcohIDAVm1xJEsq+i8j  
8p22egj08Uq/LtVKQRlW2wxeW4VAJ11uaOVgEsr7Qi80KjsEYq0yIp4kE1C5

Mi+ZofwQuDBu7bpMT0A132Z+kSgNAXtasb3lkHjU490Ecg8pBNBkK5UuHzza  
uetG0fYIBLbiZj+GRMwiEwzpT5ynQuD66ct8X1hi0c3DtTr18yFgTb+cF/Qg  
BhWWpH5puxUCYwnlJ02rcWiAcBJVKVcoHP72ROEfUzSaZPWGjUYgFjxNtZNZ  
86LQP0cRkqFIKAjKGrHxqUehfRFCvDsKodBsVqzPFxaJSpaW913SC4VJzG4o  
jTMC/XKw7+IoPhT6B0i6Geyh6Brn5qp0Sih8cuXISw4MQRm082aHPgiFxFZIP  
4drzwejZs9Z/RQpCYeHY5LVnXUEowXKt0rU1FDZS8GyPygLQ507cNk1doSCm  
wffq6ukAtMZHIYOrPxTe3++To5T6ozOECJe6qVD4y4fX1Kn2Q5+YH0qloQoD  
1/oXC7NffVAJa76FogNh0JB/0IzbxQetvCOjZnQwDO69ZL3lseeNdnror+Sz  
hsHXr3YuODFvdDP2wVVdgTD4rVsi/CfZE732RoI2UzUMWqz1/2yT3VAT9aWC  
JDQMmC97MJ6wc0Otekp049T343c/tbCwuKFe82fuB2iHgeVSqbhoyz30oQAq  
eetmGFw7G8eXgjqjuYVUPUYWYXDjrEZXYq4TWqzc7HnNOgwiLf5YJ7M4oQ36  
WiTMMQwIkX4nr83fRWejDfSEA8LgculNn9+td1AKJ9cv3pAwOPEzXjfm0h10  
++nQg8MRYZCa49v8s9UeZa4zn6bFh4Gqt/QO1Sc7VGHZ3mfuQRh0xX98kExv  
i14IlOCbeBwG5i5pLmIPbVANhqX64WdhoE92J/HI2aAmwu6H0l+Ggd1LAei1  
tkZDjAOzXtWGgUvU36HpSUs0dhpRe0EKA4EGldQ8nCWa7EY1+7gxDP5YzeVf  
kbFEc/HRp4kdYSByVKx/958F2kkmNrmPhAHKm3Hkk6852n/V4I7j1zBISbNt  
+Txuhn4dPsJsMxkGtjtuDNpXzFDK2gMjw/kwqLGRk1AVv4lyi+X+UNoOA/my  
5t73TCaoYKV9wundMOiL+XOKlnADIVCTUBCnDocQmqt9Gw30AtmJYHHD0WD  
1juBTloBY9SaWMP6lyccsi4x94cbG6Klv7vONqqEw14ef227jD5K829YwOdC  
OGTfGIp706SHGtN/p5eCcHC+wsTmGamH/j2y05x2ORyY404CR8N1VFtBjtjB  
ej+vcdvf3VQXfXLunL3AzXAIb0886demg66CvxW+W+Fgnm365a6KDpp5/ZbQ  
BbtwuHaXW7Ne+Co665zQyuYVDrprnzsPHr2Cqno9KGnxDQcaDrOcCw+10ITA  
F/f9A80h95qTLPmEFnoWT7o7HRE0ot0EWRP5y2h4/k+W6uRw00f66D7JWQPl

n9I1tigNBzrpIncaTB11mzfFDr80B/7fQzfUp9TQZoqdeHtVOJwZNra3i1FD  
Hf8F78iT8EYZ+EmMwRoDX/JE7qP4VDgg3ZaHsVQZpG6mLrecDj/rstr3h9F  
b0u9d3PtDwf5IV14+A1B6VXH1Ue+hIPe5HXhU5UX0P9usM69WgiHE5n2TIWh  
qmieBW+v1XI4Eief+Bhvn0N37ERrudf2+3WfxzPM+xya7YXGh22Hg9rsb7GT  
3irocvK904YMETDvcW5RJ0kJxXd1+/45FQG8aLOfvMoZ1NwsvuSfRAS4MMqE  
0vQooLILL78fkI0AtUdmJmcdFNC+g40GzEoR4MdzKjvwmTzKe/G1jIBmBOhO  
n9efkJFDlz652gppR0Cr0wXPf0WnUbKI9KNT1yKAo4/GgpbqNGod8oJB1jgC  
ePZ6305VyKAva+9Po/YR4Jp5VC4cpNAALUPei44R4KBjvRJeJInqDLHrX74X  
AZYyVKTxyRRykYc+bpPBEh70cwfPJJAVeSCHljiIqBp4Ybz5TVRILFepdcW  
v89/KT5IxUcUHdP9RX83MQIy+i+k/vp7Cg1zuuflnhEBJ2n/xURxnlb8yyy  
R+RFQGABGtBpdhJ9qCiAwXVGQFDV85eUdWHUuWXkHb4kAvSHdC9fShRG2acM  
JFOrImCz/la4SicQekNAgy73fQQMKuR8eWwkiIq/or5Q0BkBsnW7vQw7J9Ad  
VbLHq+4IOLvcn7F+9QT6xER5onIwAm72FSVGBgmg6kSb1tnI8Dp5rfrB/z5  
0Brh2dWOhQg4ypppODbji+LLn4t3L0dAt5zoLtM1XIS2hy9jcDMCDF6RcUJy  
x1AfRlb3OfpIMBxtzqA7dhTVetCZv8gYCVR2TA0eD7IRXvGY8RXWSMiSE9R/  
fjwbJWtQ6Wxx72PP4uv9slwoXfia6CGxSPA5qBpe4XwYHZ/mfbEjGQmehIqv  
bQcOo1WaF08uyUbCIdv0jvksTtSeOe1Ej9K+/6RD26EBDvT9fUWedM1IkOv9  
r6P5Jjv6ZOdWBk47Et4nlX8rpWJHfW7hjhvdi4Qa7iwGeX02VPTkELuZcSR0  
Pn2k4vaXBcWV+B0Sso+EnX92B1VDmVALjmcxnI6RcGnjGXvlD0ZUyauDjvZe  
JByYin4fZ8Slzp7jpZnzjoQnSzfdtlUOoZqtb3deRUeCdXK3SLPIQfS4+Izf  
k7hI8BX5Fr+eR49u4pl/Exp29So1nZ6Sokfz9G6te6RHwsYxLp8ihA6IH9tb  
VHkRCf/KI369DzmAjQnIjvlyGe7d35piMH0Kpn13/wFUeCv/vatffXNKj9  
neyZvcpluM/Y041NU6Pv19S+trREwmzF6S5nRyr0iZGjWVV7JASKJ3ElcVCh

PjUpI/ldkUBQoJ/z9/6HiIZMD+D7I8Hxddl1KtE9BHcoultvJhLWc4m88a//  
IBbOxTrqPyIh8kKM9OMTfxClnoHOM0uRYB4aafArcQeZTRNt496IBLPJ7esc  
vtuIpmB7/diBKCCy/dSudPyNHFRmKnc4GQWezD9OdbSuI+JHgj25xaLgRyvr  
brD10qK9uqzYIhkFUV9tgjyp15HEor66EwpR8K76s/Z3jTWEW/BhyDs5ztk  
e0hzjoKo7DLFRF2Kngt592mt0yjIzdHgKwpaUbDdeM9Y6yIFeZJm1Z1wPQqi  
GaMK3XVWENFDEsOXLKJA2lzmEvfeEqI1+/DhmlUUuNtQOVa7LyGOzcy3su2i  
YKyA9iHVj0WkJJgy+cc5CuJZuduOjC0gSmvVixWBUXBCPImX4dsPROOL5j/B  
B1GwXBjWq6L0HbGvqWnszoqCXkshpuD3M0hsumRUUHYUmA62HUq6MYN0XWc  
9  
Njy/Hy/0iPpV4DRi2DLASayKgv94iNmh7ZOIbbGt607nKDimdR9/580YEhka  
oTvCGg3S783/cpp2IilzubicGOaPBK4zb6T5j09Ki1ebymTsa3nFNZNytb0Vo  
OZkTPx6PBj2tF6/rFRoRXG56d6NsNPCc4Wy/FVyG4DsKrhdei4YJ7ZAnbGoV  
pOTDPfqBidHw4ufXMHHWAZKC36qVX0o0PJdaOLzFMkjgGzvs4Z0RDbIPbJP2  
mlDlnHkmKa5PosGs7fneB4YRUprKVJ9NSTRMdpvvl9wal2Xe+vWfTnc03MnU  
FaG1mCKpNB21vdIXDYqvFNvgjkyRRkRVvTQHo+Hq7a4pQ8NpEi8lJA3GoyGf  
9jHPvyszpKwlhoGzy9GgtS3b3X1mlvQ0n89YgBUHnMy8kh2D8yQ8LqZwkAMH  
z9WMcljPL5C87Nb3iFw4qNIQvuH0eIGkdfjDPo0ADrBEI9yL5ouktScB23NS  
OFAv+Klt2bhEGgue1X12ej/fTA2bHtdP0ntzg+c3z+DAn/NEwKE7P0mPeCWv  
flTFQRq1knfFgWXSpyYrRlorONhWmwr4KLhCkvXWWHXSxcFHqZGpHasV0jHD  
co1T+jhAgy3McrNXSMscccv3TxCQytBmKsxEIQ1TNtT1zXH798cOd5oohdTU  
Y3mf0RIHOucUfMuAQRqfoALBd3BgGO/4dsCNQopwzk1TcsIBX1HHUj+OQnK+  
yj6/cg8H/LXzZk6PKCRjySDkpQcOXi35n04roZDg0I9ka599/2CJR00Gckny  
x3+zfAH7/XiW/ySul0LiaqtXHqJGwWByTozONwqJkK+KmBiOg/qoLtfEJQpp  
Ier+9OVVoHDSWfwrW3qKQ+m00qFDH4UBWz3o4kGaVVK/uSggj4ODGfZk8AaZV



UqHQlwnPJBzgyVMsUpyrpDSqy4oyaTg4siun9PToKinkW0Xc7H0caOLbNLz5  
Vkk050PjTx/hw02xkU2BwCrJ4DFewfQpDiZd8G/OHF8IIUGbOM4cHPxQ4LLh  
3LeLm1l/+ZCHg/6TL1Iw3IUSp2r36ehCHGz6zjtWca2S/vKoRqElOHhsn8zp  
wbZKmv39Yvh30Q6OiumUuRxcJfUOcSiUv8FBJaXdMXeXQnr7JjcsRYHDTtV  
DhxrFFJe2vzASRIOEoJae0tnKKQkTyPjrw378yn06QgYoJACDBpDMLpwUN5C  
FeDSQiHZyst8vt6Og5zteIbIcgrpGvsDsUNd+/ON3HhUIUUhVuhDWrqwUHX  
g/mbB/bnJdLt1hv4eX8/PXmdbV0oJNbiMRHFIRw4aSlT9htQSFOOIR/zx/f7  
8101k4+HQuq6lihsNbW/j0x8csWrK6RqcYIP7ywOcm27NpzlKyTCrM2JhJ84  
4JhLt22QWCEpWh929/iLg580HcWX9vdTlGuR+RhVDJw6c9z4VtVPEnd7U0H9  
gRjQCBNYzNnf500Zjwlmphgon+JL6WlZItVs917PPxYDB2aEBuQdF0kXkhNl  
x5RiQKA2R7nQ7gdJ+pJ9Z4RqDEwdes/PtjdHEviN2EugMaCIznZupM2R9sx/  
PvbRiIFXzbrKN8izpAZxHRYOwxhwunXQ+BDVd9KlhkNLGu4xQPOKrrzw4iTp  
rOdkzJJXDHTi9VPj3k+QTonWnkz1i4HVw//xXtCaINETHMwmQmPg4unVh1ZJ  
46T2G22dAYkx8OdfScpn71HS1ZWol6VFMaB01wm7NPGJZHCC6s6x2RigOnN+  
LlAyCWk0idVjW9jHhyZlP/+Xg8ilsqvSLe9jzqs/S1+VIKwMQiyrv2IABt2M  
dj7VIZ2raq/b6WIB/rAxzR3rQNRal//5nooFPZoTzrfuDCnl/5jmXSRiYeLD  
+Y6ZiRHkuGpan41MLLg12XqwmX5B/pbkvriuGAty7K3YqUvjSE1m61UxjVil  
PZDimbk3icg5H8wctI2FH+KNb8bM55CnecTwLof9fATbLN3dOYR18qhTk3Ms  
9FZOGpMe/kCWjMTREq9YCDs/nkLbNY+YJZWJ5frtx7Px1CXfXkA601U4HgbF  
QmZqNlXcygJSgF2ZiY6KhZpUTmUh2iXkaMCnj4Gx+/miq7p8Y5cQXKVptTth  
vx704x9zGH4ithKO+FtpsUA1+8p07s9P5LPNmud/mbHQ8DwxvVLeMqL+JODW  
laxYUPle4Nk0towIHo6XU8yNhezZP+VMhSsiUfcwr1RBLKQl/DYOoaUgezGP  
Dgi9igXDibYBHxkK4tj08id3WSzQxn0lW5hRkLG/RYPmlbGwIZIf+CyCglxV

PttAUxMLufqp3jT5FKTO/d3Lrbex4PWKndu1nYJlvLqUulwfc119Ce/7ZyII  
5mxX0ExzLAha+1MEaVaRg0JG9qNt+/bfarvAu4r4mH293vthX6+8sbHw6VXk  
e7rdufc9+/YiEbsKWEUMe38Kv/scC1u0/Knj11aRZkYf5oqhWBAZLbySZrqK  
KGjs/cr/Egvv2rG1BstVJDsU9+3xt1g4cu/Kpr7tKsJWx9qROh0LZXeU6s/u  
4/Z7E5sac7EwdtpBunrfP+xkhcjWwn69PoFN3/fznRuONChcjoWs+2Bffn0V  
WSMYhZmvxYLOWsxfRvVVPehNrIR1c39+00K003Kri03m1peG7X2+jvFUKf5V  
RKCo85DnbiyYUxEt+g+sIo03s5RPUcfBxixNaff+/w3xyD27Ido4cB5ldGTa  
75dWB5YaxxAHJiq+XoG5FIQqhKPxPPM+tuB5zRZMQWoVppd/ssXB0ksyY60+  
BfGYq+TPPhwHuX6qlg7CFEQyC6dtcDQOQK9GTmB8Bcmik8yrOh4HW+iLGPqt  
ZcSo7s9nB+E4YNdlor7jt4ywun6k5hPdx9tX7lyg/ETCht1uhcrEQcGNV/wf  
W5eQcwnq8fLyceDnl/Hv6sklZE3tS0302TjoPd038d53EbEpqj6idSEOGuwb  
L6jQLSD8lnHq01gchBlWCa8h80j/ET03VxfjwK0jVO20yw9EM2TvA/vV/fxn  
D+vVlcwikvoakSOmcZAd10turZtCpum0lssff2o8X2/O7mjuJZNX9GEes4iD2  
FH2tdeQEwipCUH3usM9vrjf14OIY0jZ8y8HQeV//7YPb7xtHkLCE0xn0bnFQ  
tuPncEpyCFnd7Ft19N3XN5T8JKrmE1JYlHtCIHAfH/I7euzdR8Ta0ke3J2Sf  
T1sXKRhpQ/o7jr08g9vvnwEzU9ORaqQmy9Lyb9o+9ti02Ewnk9z1FRJLMvf1  
mvb0i/u/J0nS076zzNq3l8f9eDz8kZTlmn+0NWeffz7tT3bGIClUfbk7oSIO  
HMLKLQoTp0kqv+v/YIVx0H68sYqz4TuJUpQsuVYbByqfZp6R989jay5FnHHj  
fn2x3xlV5i6RNH8Elid640Bwmi9h88o6KURkr0awPw6ERQ+I9bzZIL2xDDsr  
PBwHaRqOEdSSmySRkSipUxNxcG3xiFOD1DaJujPhmBQIDuzD7MIbM/6RVOjZ  
06U34mDolanBYw4V2U09hV12Kw50mGAVj8KoyeN1GQflqfAQR//TYObyAfK7  
oqe/lnjxwF8oeKOP5SB5Y07IXeUIHkKsIzNZmRjIUiK5S+d48HD45e10DpZD  
5IdZBdMXBPewduWMSsoJjrJvQvknDtk8vC5jsooPZSMruDYXX9PDQ8NRpOB+

5hGyY5GGhJ4hHvx0NKvrznORn8215eqb4IFztbc1dpyLzG7Z9cjQEg8Zlm1P  
SUJHyT/1BuJuuuFBuKIpsCztGFkk4QaduRceRNWs3upL8ZLN00bCbnhwXJJ  
1fcjmZfcqTbuaxmGhw7nv0JLo3xkmhDLdasoPEAxJ2XUmp98rm7qnk0sHoq+  
NWyd+UnFyjM2dkn4WGWoua39FWA/O3e3ck7aXh4pHqx00b/OJm7aNH8biYe  
7uqcE5CpP06+Nucy7JiFh59mbw0jRE+Qo09S/nPOxoPnE0tbmZgT5He3PXpc  
cvFw/0rD+f6JE+SNRxvargV4801QsUs8JkiWGvZ57/YKD3NDdGGDqCDZ+si2  
mkcZHn4scNpzWQqSH+oFkjwr9/U+lmI7HixI/kTYVfGuwcPzOD7P5nRBMkNH  
aKXPOzwMajfEDb8UJAMdjZxfAx6eBpZqy9UKkn3Voor8W/BQVbVQ/LhZkFwS  
TC8W2I6HyQypovV2QfjsbezzoC48fKtCVOk6BMkCm4zHQ3rx4F6+ZPBi3/8m  
/faEcz8e/PuMfeZqBMmZ3HM5ZsN4WJeoiksrECQPia7Ya4/hAa/fQAlPESRz  
KjdLnJvAw8iUJFu0jyBZ73L5ktjMfrxvkZanoSA54cbTUu4feOB9+ZtKWFqQ  
3HknwYNUcQ+FwnljzsnYax+gYobK3igidAi7CSdIGvG3t2aWsdDF005ksqj  
E+TizBtvP/3e759t8ERY3nHyXs0ZtdJ/eLD/6IHcfZAvtAhRPvkQDxsWoxx  
h3MJkP1H2NoIB+NB6huj8NdIfvLG9qKOI1s8CL8TY7HU4yMrMI6ymR6OB79n  
3QT+Ul6yK2973+Wj8ZCHKwo+d4iXvKCa3LqRDxwWfmt1ZfxkCcCzW0nZONB  
sMd7RmaAi9y12xVofC0e/uT4pB90ZCMzsr5FNQziQcOJ9mH5CAv58vGX1GeN  
46H5LS7I5wozuQmNjuGwilfjx67ezJc6RK4JRVK7XOLBo5p6lYbpAHmTKGX8  
1j0eKt5Y35qMpyafyT52rNA7HobDg17EcFCRSxp+PYkjjgeHK/5EWrmDUi51  
SaF6Qjyk8/opKE4tk6Y4slzkk+OBvSjQJJ48TzohjJcTTI+HH6lmtg9LZkgP  
1e2rdrPiwa1bfDwodoCUFHm8qeZVPEwMfUydZOtFulOZo/PL9uNpKF/erg0j  
TLk7lzMq40GbS1lttWsCwbUMfvR8Fw8pINpkdHgeae5vSbJuiIfRwSsZBJqf  
CNX3iv/0W+LhhLKa5017ChJIRxyR7YqHuV7mXINf6whN0vuJkZ54oH0VHZwU  
/gvB8+7NRX2Oh6vUGz8f7mwiHC8UV04PxYNcbcNI1e0tjPO0y+boaDxYkAxP

SZRtI4J1ubvR4/Hg9JvnjdLiDpJ/aYxWfioelq77uliw/0Vkew4zj32Ph6Cy  
AQXl47tIlenVwzHz8ZBFkz3/+sgegs5E8Cr8jN//H0V9vq3tIa336oS+UuIh  
5MQx0l71P0Rne1U8diMe7Md19IvkqdD+SAm5M1vxoOOXRscdQIWasVopj/+J  
h4VP9390VlKhU5mZaNy/eNi4HR9YPkmFOp7s1Th7gABH7ucLiVFRo6vFB3W/  
0RNgZPGIwXc2atRPBTPEMxJgpe9waCI7NURV7G0myLqPG/p5W6mp0RjdEusJ  
DgJESRLuS01ToazD3+/GcxFAJ+reHdt9vgxrAXelYwToVy/7y+FNhQr8NPSb  
5CfAxGh0x6AIFZrrSwglCBKANuJyWCHuHyJN04JTFiGAx+egF7ez95BKwp+E  
KTECBKYemePI2EX0Hz2TniBFgNoiXwn6O3+RpmeOWSqnCSBBx6Yfzvkh0ZZ+  
njOtQICuKcnK35nbyKeqkcJEJQI4P1VIvku/hZiocVScUyXA2IHr60K3N5E7  
xmENRDUCDNN9ab87tIYsT1S3qWrs67tkdBuwTUF8nFa6v2sRIHZ0zf3V0WUk  
Kszi63k9AhQEvySOMc8izwsv7MxZEKDBzSp1obwZ+bq3dQaCCHA23WeiXXeF  
ZBsnd34xlAB5pbn4jvlV0tJhB/WMSAIonCSmG4tvkHbEh/SW8AQopHzasU3d  
IkW8ZjW5n0iA5sITabakHdIhVPO2egoBeORGHjGM/yXx/PfGJfMBASxlEVWB  
UCpy9tclr4uPCRBRLqWeE0xNFnMQCvRJoC6v0bDthcNWSk4FX+pgAA5SpRb  
GVdpyaSDH5JXiggQ9uVP1iMJ0vKlFJoHD0sJoCoinryyS0f+L989n1JFAFeq  
4SHqmINkk1rTvwt1BDiWN8rJd4WBbPFBTf87mQCdy0TCh78MZNuvEnnfmvb1  
dkrkaz47RHZc4fgz8p4AfpKjLfWKjGQ36p3r/ZOEMN/ru+xYy0j2OTyV291N  
gBklzRR/KSZy0Kn07fa+ff0tdvRC8UzkCOWKa82DBMA4zFZKvjCRY688zCGN  
EmDZc8/F4CQzOdEsYqt6nACOTNuUI9bM5DQXR92KKQIkKuEHF+4zkk+GGjx/  
NUuA84arQe0tzOTsZNXfeQsE0G52UX/+g5mclyOs82yZAA+n0GjnAyzkV28Y  
nz1alwADR240HxcLubxt7Vf65n79xWN/cgRYyFUjo9pJowSo4BZf2uZnlb9b  
bHqK3yNAUVFrH8dhFnLTbuFGFE0CnP2wwTLxj5nczpZ6JZQ+AaT7N/6YTDOT  
u4UCn/gzJoDrKbo/biRmcv8Zm3VP1gQYFbC7y5/ITB7VuKp1jzMBtPKNX1w3

YiZP3Djz2IE7AbJCOVj+cTKTZ+/yrVnzJkBx3tje8TYm8lLggcu3jieAKWVj  
OMedibyWsPjohnAChL59sB30yUTEevqZoi+aADv2jPXFlnJe+VvNXQkE+Cl  
Pi6GT5mRTNuS81BTNgHsR3XK6+sOkdl+eF46r5QAhWrVz4JyGchHdsweKKom  
wPLXEZEQRgYyL/Ol5dNoAiSlXoqIsT9IFpU7kimimQB971cuRVLrK6XV/y4d  
196vl6bU3gKllysYzqgdu5YAwX2vv3B60JJRv8pFFuME8CuOVxmpoyFfwmcB  
w80EGPP+Ova5h5qsnRWVTmORAEXXPHT9R6nIxcg2G2G+7ff2mrTzSz3ZJLgy/  
Uia89/15XmzyhWyQPHi/zo36J0CNkqdvP/sayU+69cJAcALeenwqSLu2QorS  
S5/tiE6AKOljf3a6vpPw1sHnW+ISwCROZTnq1CQpysuiZyQAibUjk/0xEZI  
WZmKqq/TE0DPOzesd5NEel4oQCx+kABhxUs6LOpEpOAd3Uz+4wSYEMWbdxg2  
IZUTAwlZLxIAp/91MyRzGKlbI01lvEyAqmROtdH2b0gDbZ5ycvG+PtnWVTbt  
aeSDuM9k9JsEkAjku27vMY/wvskPuFCbAF6qb16coF5CHNVGDq+/SwA3rZ1w  
fZnlp04jY/HLhgS4UaR6J1GVgjDevKBp2ZIA5PhhVX3JVeTmrMs37vYESD7O  
X069s4oUejz1+/ghAX6/08bkCtaQnb1ejqieBOBueHnT5cw6oh1PU6T60QEO  
h4f4XXm4jjw8evbS6mACcJmyshp9WUcWcuy+5o8mADx7kiS4f9+pyt33sRhP  
gli/Kkj57DoS966djWsqARJtXUtnGteRYa2dgg/fE0CHfVGFkKndER+QUo+Y  
T4DKnaXvOYbrij/VrS8qPxNg/HhVkyvLOtL+M9FrhZIA/b4xXw68W0N4AhpY  
8jYSIIfq+QUqqzXEgX4tz3wrAYwqNddod/ff1yeMRjr+JUBFrAlhf/89alyE  
8wg7kAh+T//ERj+jIHnKNUzKBxNB9qMB09IJCqKpx4fmsibC79cWOS/2z+eM  
MZ2hm5yJ8J+Fi7noryVk1iHEjYM7EaTZsiNqOheR6PDJ5yECiUB/y9+Pw2Ye  
aanIP2gqnQhKKQo1mU4zyBFsJjtNLhH+3syMzZeeRmw/MKq+P5MIG6Py+PaV  
SeTAjlvzmf0JcLOCjT6S5huiznX2E4t2IpwVD5j1mhhAUp7ZObboJkjWmnXA  
aPlnZerm/oFA/X39DVxvhfCfkAjNHcUfjolAuec7wFXYiTT6NjxsurOf/2SM  
wx7lDcJou3bG3ykRct6Nm+nbFSOWSSc/nnZNhBqXzXS+zSdIGb+R/axHImRP

HnZf9HJHqF7i/mX5JIKWzciA+HwaSU+xJvO/gERYsvJ047fJI2U3zsszhiTC  
bqnp7b2MhJFl+9DQ3giRjdsTsDOGxKM6tj6RieCso288qWGOIKSfcuTNw+  
dpGk5eeqJ02slWbMEBKX5FaL86/kSQX0nn6UVIijOw5y5+TbCaFMh3u0E9L  
hOkJh76mBy2k7vuXrBkyE+GANN3tq62tpOMiPn/ljxKBWs7gwNbL96R7Zflp  
3k8T4egFy8Wfl9pI5AsjMtI5iTD0FLtokNpGOvLYh7U3LxHSrv13g2cf0+4e  
XvEsTATFgFuhoxfbSA23ynuOliTCU5mZCz+evydxk6+VvS1PBNq7Ygwp9a0k  
5+NLSbfffjIjBupeFQGsLqSkkzv1A7X5/yg64nKhuJrlgLQpXGxJBu5L0W/50  
I6npqdXhleZEmIxmyrww3kDiofq3ntKWCJmGNK4X6kikloZzb0a7E6E9cd3H  
XaeGxK9equz4NRGclb8rSD1+Sfj4rsPD0pkIw90BLuGN0aR2moWt8plEmOAg  
NZn1PCJ5NYvUbS8mQII4+ijtmQep82TTw8cricB+V3mHtjEAEYy6Hai2vm8/  
l73xoycZ+XDp4YW4nf367XmZvO/nIIvlAVk9hLB6EOp/MeXBYgP3cBuLzUR  
+lS0pv5GFSNddh7jXnREcJvPW5DmKEeE37PV8xwiwu3b6ZNZyGvET7T46Ttm  
IgwmiSj4X3qDd000wyzZieCVFFfjLFyNiMzNWdIeIcKo27aecH8NEnA5Wq3g  
KBfixRa3LhnXlb35wsI6fERo8P7W9qvmLSLK0EBDOU4EgTqO2DIWEtLXvtOs  
LEoE7eETb+3w9Yi4RGbuFwkidLXWJvqZNCAhcYrRoTJEoPPaETOcbkAktN00  
284SASemQmMx3oiEFLKIOakQIe3Yal2/bhPSz1h0k00CET7Vqlz1eN2ESDpp  
/ajAiBC8t7Q8ytqMhH343m58kQibXxcnK243I4NSkS93NInw+NphyycvmhFp  
giD+iTYRejXVXqhNNCMRSyRH9WtEoLz77yewtSDDOmZXZ/WJYJYv7gUKLYhs  
8ZYU3ogl7n8fe89otSBRLBnMsqZESK5Ilvlk0IKMupz5+cmcCPwNk00F11sQ  
ue7ej96WRHDlcy7jwloQnOy9kmO2RFioY11/I9iCjCUyEUI3iLCclv/I9EYz  
orBS4GrlRISRp0fyxGqbkdjrmnp0rkRg6juTqObajlyXTsu99CDCtNB0jxB3  
M3KWPZxD12e/39FU+c7FTQje7fgaxZ8IBzbuXn9/tgmZ6H3blxZMBEabXdrP  
RY2Ikrzpa5VwIpSz6UtGczYihOTN1LEoIlgSfFX5q4d6AKBvIG4kQiEA8eEDV

T5uMMKuGRh5NIoL5fPcubuQdMiH0sZwxjQgTnjXnDGzflrGrDqyrj4hQ+lzh  
v2SPGmQ0KbuNVEQECZ3Zx8P3K5ASv+VfZaVE8Dduer0qWY5EW14QyX1NhLy0  
MgezuFJEWm44DP+WCNVCVBYHThYiVDyipcH1RPg85x6fl5iPDPzz/OrWTIQX  
TetUPpwvkJAeNtUbH4iQstOsFOaSjRhU33LQ7iFCO6XB0jwCxF7WpSBfCaC  
ygODjq+pmchf3HaL3ND+/Njj36PpyG99y6vn/xChA//q8BK46l6u6gQoiKh  
gSQzIfnQzrUryVSpjCUhQ2ZKxiaRRHSv00kSKZEhRYU8h2RK9DdPIfNwSUoo  
xHvej+u39tl77b3Xsz+c40Jvu8Ip2FNr+p5t3+5Ddv9Jtuiv97AQ0vAJ3mFi  
HvusFopC7mDmsmrX/43dh2SpbUIvu25hezbfyJ1l3Qeji0dqN89ewxbmG3qG  
Z+6DujOUrHUHYfV9Ozd0/roPl4yfSnob+GOp1Rd16hfuw3LHuldyBi7Ypby3  
rmiJ8G9QUnnP2EnsKJ2TVrB6H0LWxR72PyeLEkgKgyfXkWFVtifdLMUKhahb  
hJhxoFYiJr9mtEF5CwbzH9kPRnOK40tDzd7IvOdqZkkbjLEV8+zKxb7I+3N  
1ZjuBjJMLQpMjFMulwn26TY1PjIs9Wh2TS1cQXwLgt57N5HB+NHJ1fnxYLQw  
qcchw08GDS+b2zWuoWigzzFzAsZ1gK0k3YFhKH65jqtq27eSQX+g3+k9bzgq  
qs6v2yJMHqRh20SoEY5SS9rP820jQ1W2efXnqTAUk7eywLmDDL60v4pwzTB0  
KV0qYXUnGY5oSXL/3RyK7OmmMn/EyPDXqmFsf3gwMrobUPZTnAwHZgeuG4Zd  
QarXkk5PSZChWM1iqX3jZbQzoJw1lkkGSWPeqJca/mi961hEvzQZ6vDVeMlv  
HmjWdtOOLlkybDxm0Bt0yxn1mGsWNMuTgarlQyl+ZonyNW/1VymRARbmNe3L  
jmHWnOIHcjTJ0Pvl2iMV0yAM/hi2PNUmg3pge93ZhTBMcdrLI1WXDCKWQRqH  
HtzA1lpLmBR9MpQrnB6wtIrCWLUDKnEk4nv73aoB0dFY23vumiggw8KlBynp  
mTFYVobV72BDMpx0TDNeeH4Pe2eZnnfCiNC7XXhgvUsCVrP+u5ucMRIKuS6H  
e3GQsfa3uhJrjmTYOfg6er6GjI24R3V3mBHzM5xrDiL80be9KTH/GBme2Z3b  
FbA7EWOvFzWPPkGGFyY7FUZeJWKC4e7rHU4SGDv9JlyNiu1RKsS1TpOBy0Ht  
1p8UKqbatxq8yYoM8619J0TnqBgkmKqNWpPhZl1E/1N1GnbCgMEqsyXDcRej

GaszNMxhdjCDdoYMgU2WBj8u0jCfdOVz3vZk+KbVQVE7R8OungoVMXQgw0CO  
uF0wLg2L46j+T9SRDFI+10T9+WhYcpHA3TknMkiI0bsauqhYtqv9oc8XCN4f  
Vf18TMWKRbKWn7iSoUDp+MbDjlSsrnauKMydDCH8j79K76BinSEGvqc8yFDR  
xX1++VMiNqYQJ6foRYamowOVipcSsYWejoF1PoQ/RG9qbNuSiK2/J5nc7Ut8  
L2TQJ51JwYQw390v/Mmg+zNw+p0qBZOaKdl49xIZLAJC4zULyJj64/U1joEE  
b/l0elWKjB200HIDN4jQ8zrZe0HkPmax7pGuQAgZVG8mKYs2xGPnX0/8HA8l  
6t//Gajpdg/zvaCZUx505H00esg7EovFV3/e5XeDwKTl8c3Rd7CUoG2dRhEE  
Nk0pb3x+G8uVu0AWjySD/xaub+sSOx9V77JQhQZyEIT9/KjI7D6u0vsX6IJ  
f2YMu1feuo517zcqexZD9J/w7BgjPxSbmKJcuRZLzHMy8KpHQiDGDVxhQimB  
4Cv95tMqnDHhtcB0TjIZ2NrM3JW9TTHpgoozvRQCa/cmbu8yRocFbRvj6MS+  
XBsf8y36o1MfM6lvMAn+iD6fp18lcg78YXDgARkExk41p0vdRDc7ol+zUgh/  
XFioTbwfg+7fafGqTCXD7J7og1yC8ShVV1wmOY3o56HiYuwigZUlv2GaPCX2  
URRq8Huajj6brTu5J5OYZ9Ur200Pk1DPijnv3+dksL2l2DPs+hD9dRi5mpVD  
4NsG6mIv0hCPgKr2zTwyXH1hxRus/wRt/xD+w+YlGaKyerGL/RliW2qrM3ch  
GYRy4x2OnHqOLO0fPOpW+v/5v9zhz/4SQa/rc9cyMkx4W+ZMZxQg/ua73K44  
GX6dPiyk3/wK5ZY2116oJE03w/SnAPMiFPZyXu5CFRkaghZs3ye/QcZPd8Q4  
15DhrUWZttvvt2g03snYqZ4M7jKpFzLrS1DRrdtZjg3Evf3z9Xfq0ffoVnA2  
j+MXMrTOBNmVN5UhcaefdQ4tZLA5liywm7MC2WpGmNj3EPW3sz1rivmIZBWe  
ZZ/tjcM0z3PejLAqNL/r04az/WSoSfDvP3G5GiVy6m3GyLDidJngimhtaih  
J83UhkX4s8R0bs+nz8ggosLs1BIZ7P+WUHksW9DmoJGckytkiPM8HJA+3IJ6  
PXk2nlw17hFH2Y6Qy60oxNKi4QQ7Bcif653eUdvQa7kB8208FKi7dj/10d6B  
ZL+sHTPeSYFcrQMva5Zf0UZRAwvSfgoceSpbtbQ2iNga77SI6lNA3uvJgffy  
EJq73mT5F6NAbZtd0KbwldQz5GRXdJAC5615FG1+D6HnL6KcFU0o0BmK7ecf



HEaH9tcHithSIO5669X7j0eR9rTg4pwdBa6nxDTFto0ihdSzoc1nKfDxcm5J  
J88YEmD/fu3eeQqcFWoEa78x1PeJ/w67OwWKO8xarmiMo6Zw2w0DFykQ034i  
It55HFUpp8chTwooEvXmd5DH0QuK0jnElwl6otorg6xxFGJn9WDMcgv8x+qm  
UeIE8uZLFW0IpsC53IKg5ZIJdB6NPcoOJfq/8pOxbWACGe0JeeJyjQK/MpTL  
OuQnkV5rhfShGxS41Mx2ys9sEind3vB8dwQF0qi9j5u9J9HWyeScnigKWLif  
u92fM4m4Hg4rF0cT8zjYk3f90yRaMlcqoMdQwPUgf0Hr6CQaKEBFFvcocNjw  
5IU701mozZLLRyWBAu382s++qrNQrdCJEj4yBclTbw39Z8JC+SEDqIZKgcVH  
2QMiL7NQuqICPKVTwNpi02ndaBai9QZURjApQE/edyqEyUIxCaWG5x9Q4M6W  
dm3ScxYKB45a/YcU8Hzg8SngDQv5/jIz2fmIAIQRuxajShZyfr7vJhKgTM+  
/DtvNLKQIXXfsfY0CqxG/Lko38lCxyjyTa+fEPp0b97BvrGQfqnvKfJTCqgF  
CZJKRllon/e7Np9M4ntxUSsGi4UkxdlzLlo8ESYi/7fdxYSaTLuln9B6AWD  
mvM/WGjDLcpZrlwK1NxSf3WQwCsaPX3DeRSAD2bi/kT87Kik44eXFNgySNA+  
OslCw0yvodRXFIj9+Djt0QgL9Wh48lwupMCOJ+WrlX0s1PTfRZWjbyigrGTW  
vLudhWq83C1F31FgqfyVcn09C5Vxu4X9KKZA0XtnhSKchV5nuKR9LCXew7XG  
7q4CFso2uFDDLKNA2QUnS410Fkr76jTthRPzbojPx+++zECPYURaQKDAvXPnv  
ylUWurf1vK5QJQX8Un1sLN1ZKPLIOYeJxTYULXWZGnBQmFm9lF11RTgHB2/  
cUmHhfzHz7wg11lg4zw9NEuMhdwi7ZpcPlFAIDG49efajDq323ZB9zMFfHr+  
PTEZnESmNlaHBr8Q/csW/RFInUQwd/rimyYKVI1WZgeFTiKd+6cS7rZQYL+m  
hmznqUkkXXuiR62D6GdhviNwbQLtvHCcjauLAt9k5bSzWiaQwJq5bE83BXoc  
gt9WZkygf9qml271EfE06v4PDCbQ7xbjJOtvFCgcCm8z451ALN+juOl0f94  
+svmlnHUKWnl2zpC+HsKJAzPjaMCEYMnUtMUWFH4e2i/zRjKfl3VLX6ngCib  
1dtV/jH06Lj+zOcfDAw5jH3qxlFsdF6+wPnKMCRpa55UGkUuSxotFQtUeD3  
8ddcrcR92NYhz+62IRE0x8mcGtg5iK7TBZ2zZBOhZV7sWdandqR5ZVllqXwi

rDay3hwfaUMsy4rlx4qJ8MuvG+b3rxVZCfnSmSqJEHbypZPZ3hakRP1UF62d  
CCMJ7P67vjegbvLNfa5GiXCz9z+/iJPvkea9mZU9bolwoG+xYGBrJcbyqv60  
62IiSE1MRd3dVoU9Nkth7PBMBCcniUtPRGswXj5T1S2+iXBcaul4s3Q9Nnj3  
2QW2oETQe53K4yvWjCXcsa/vv50IsNU28oxmN2borsHsuZMIFaoSBTa6PdiS  
Ea9Lx12C37v0dPLAV8yVq/hfYzzBj8q+LYY+TP/2VjVEJ/R1ppDxlAFs8lY9  
8+GzRJdYH6771moEq9pdE33leSKwyZXkz5SNYKllH66cyCZ4uwxuUclRzHKH  
+DRHHSHTlW9/Gx3FVKhFh/ryCV4i872B4Ri2QbVA7V0BUW8+/l9U2hiGezzn  
9yoi+KjZLB6LcSyJK2PV8G0iDODuKs0Z49ljNTv4sWJkGb8vS/v9zgm30f/  
3PKe4M3a+jXijzCOMePpLiLyHd186FnbBNYvEp8dXU7oZ3DPIW6fxKgWUXf2  
fyT0qE06XWBMYr7fbwQJVRPfr2ar4f9NYsax4a4zNUR+qa+Xjq1nYVJywZZ1  
dUT84EWVeW0WtVrx0uEn9QQfbODzwIWFdTn6ql9tSARHeTNd8QQWVvjPY4/1  
F6K+ZkiSeyELS0h2FVBtInDfa4ZdGwu7q000tqGFyOcyfqBrloUdarOfGW4l  
+t3ATqnlmcj2Bdj2oXaC3/wjlU9sCvuzzybKB2UnUK0z2jVGcwlpenHgf0E3E  
H/jjI6k5heUdNXth9pWoP9ofVKY7hcWMGD2Q6SP6mTvx4QCBnSM0xaz1E/t9  
rvozUn0Kw8RJwd0DBA8+/KFyU9j293puhUNE/nW/pNdEprBfNlpW8SOEXsWc  
/UtsU1jbb1VD9zGi3r8ou+OjLCyLoqRxcIL4vsQr9ttHFnZLRV5SIEXUf2LW  
QUlhYec+S22ZnyLiFwWMTPxYm07F3Wz/fSfm//f500QBFia4XvRH1g8iP2ul  
yladhU2ni/Tf+klgvpXqoMpJrJYk2Gg/R+R7RBHfe3USe/J1U5n2/P/nn11r  
u28SuxqyIUdgyjfpIY//HUCsxFen8z6Q/R3a+u+gogJTP01292qJSLeGVtL  
l5jAxqcW3UJWCT23t6+PNhnHKmPmrE6xUcHR9Ik5tI5hKTI/DJXYCXxXWqrA  
agw7dX5McmA9gYM/poHhKKa0MrillJsKA1nFdgoFlxj3gz422gYC29hU2wiN  
YGUtbf1HN1EBNA51CVcPYQy/psY9/AQ/6Ebx2TKEBWxsKFsWIHjBMYmHVoOY  
rNHH5JdCBF4yaeSP/YZRSI5ZbxOjwk21P5vUw7owxeTb09vFqVDRsTL95XwH

VhVmd2unBIE3qdXsVW3D/hxYl79Lmoh/bOC2ReI/LFGs/fBuWSqwWeZ2/8bq  
MaV/Wd0S8gS+6N4tvq8ac8Qt1ksrEbjDb+9OwTfYUqr0QxkVAvduDW2pzMBo  
N/6oyqkSWHVjakdLGKqDNHtFTQILuOVdnyhB+z7+KFTVJ+p/4FJ9g1pRXcZH  
E3USUf8GZ+2VY53IOYr5TQOifrR/a0wu9CDGEM+HUMCL3Sls5sPotXaBGfM  
nMjH9Kf6xE+ipCznP6TjBM5ry/1XPoXU72ongAURv2f/aCTbDHlz7S85bEnU  
exEdzWb9EzU2KG8xtaeChGSozUnbBeSWt+65mQNR/6SBqEvOImJLaNc/5kjE  
08Uas3H9RZonrl20cKHC7IFXG8VallFKc005tTexz4Py7yeH2XDt12lWtr5U  
qFLNHKDKrsObEgOn7PypMJE1MX4klB3ntBTbdi6QCm0G+urz4py4V4eX74Wr  
VGg696zVI4Ub53xnwOl6nQo8k1+kPaN58FTm1mS3m1QQECmPQoEb8Bbb99Ue  
UVRlcQzkjnDgw/d/5d3lf4/Am0q1At358Q0D2Z+vplBh5cCCgOdeITzzhcb6  
K6lUyBf4MHikUgg/dAWRfNkoYDmQUBl+Vhi/ytv86txTKsgajMZy0UXwWc0/  
TFluFbpodsKbZXbgXXeNXNjKqGAREYSHViaOX7FsevQHUAf0mWg7b/huXHD3  
mc7ZcioI+doWbhaXwM2LfEwHP1JB0ik8Q2RYAi/vp6lWfqbCyxMW6RrXJPFM  
jeGVyK9U4PiQlRA6J4MfXvXWvtpHBRLIWFDKRVl8oG7BL/AbFfq3vq/Y900W  
3+nAO+wyTIUREZPJl01yeEKM2qcjU1TQd34ccrJaAb/Sd4POvUwF9RvP+X4u  
KOOgd8RU4nbSwDV76sHdQg2ci//zXScxGqxW0+zOLWngdYzQUR1xAndJOYaB  
Jm6e2ZEysocGE4ecSjr1mvjpajIfSYEG5z5by0o1a+FCxwzchfbSYAcocyJ+  
bbyj7XslS4kGTd5VeybMtfEzI6ZhTFUaRBx/sp1RqY07c6yfnNWWhAXvXjt6G  
JB1cOq7QsFaPBu8K5lK9P+ngY4LOaY80EJjdI3l0UQfPShZYuYzRQFWW3igh  
rYt7SpbbmBrQ4ORlqg73cV1c6YVPocRBGhgfutEZcUUXn1ET4188RIPDU5dz  
Q5N18YKSes9GQxoE1Nx701mmiwccDK3JMKLB7N7Rn1G9urj6JznJMGMasAUm  
OXr+1cV/W3RcszClQf/CB7aArXr4266oblzGmRvvNYcoaiHhzhqaP07RoP4  
TaPNt0l6+P6JQXLrCRqUnhRe53ZCD1/xI09nn6SBg5qCA985PRxfjBnfPE2D

55z6Ew7uevjNG98zrK1oUCnlkWriq4cf4k5ZU7KhwcDY5xtFAXo4533Tsx2  
NFD0vBEXQ+Aakb9vu8/QoKvkcUW+jx4ek/pcsMCeBgJhR8UF3PRwU1lr32gH  
GnAYJGbQz+jhG/M56+0dCf2OD0/Im+nhX7QKZTScadCsc33PKx09/D5yitjg  
QoNtYtbbd0jo4RZHBPq+udKgw5WkYcKphws24rpv3Wmg4HMqQHFEF2+z9KHd  
86CBeWxe87NyXZzRKzrr7EUDP2Gv008ZuritS72Zng8NcLfM+c0euvjO6ZDn  
/H408Ogle/dFWxfvvSzHMeZPg9QyjqSGNR08dbndoewSDWID7Bk/P+rgjpFR  
pYmBNFA6v6tIJVIHl+TTEPEIosH9ZwtKDSQdPHMnuVE4jAYPNtbjUXnaeJ6e  
qb5fBA3edJ04tOSphft++MM8EknM88Y5f1EhLVzV5Pmc6G0a5Jg8LRwu1cSL  
bDlz6mKIlf+qHxSt08TLgvEdkmRC/+aij65B6jh2+liYRCINigcEZ1bWq+P4  
5gZxcRoNHgYc2xlFVcMrnnVL7UyiQcj1h1hllipe3fpbWTCNBvXiXAq615Tx  
L/v2HmIvoEHPf1etLtnJ4CeWXxmyvaaB5zluya3HpPGmGt2jq4WEX4aCxBIN  
pPCWc0bmS++I+aqTZVh79uCdcU7Wv8oJf/xZeHq9cgc+MM70HPqPBksfqhmU  
5nW4U6G4z0AzDc56cLq3OC+joevP/PpbCf39Ak4uanNoRLgwsKeTBuoXlu3c  
N9ShycNfrd8I/zyPTy08+EK5slvFdE0SOAdl1qeKLGTPnu+Rn4ZjvROW8Z1  
sHGRZgImY+rHaXDPgN3xyO1NpF+POamVP2jASiJdfvRDmHTZK45e8ZMGJvK0  
wovPtpF+awsm4XM0aCnqxSNP7iAtNO5+VLpIA+ek378CYsVIwQ8yHxf/pcHP  
rp1hCiLipD8uyk/eLTMgd3Iw5i99N2I5ef/z12vE+5Zj+9eus4d0tfZDdsE6  
OqQb2ZzTG9lDWk00zs3noEPou/bz8XclSWyK1q9ecNOhK+hx9hSSIkXM9xZm  
baBD8H4RiYvm0iT2DxfeZvLRQUuPj1nSlk3itA14/4SfDsnNNSP11TKkFwNi  
A9e30OHIF4rOur2yJAuPOs6zW+kg9L52UjVGlrTw87KCjjAd1rTPGAv3yZJS  
wnYf37qNDi+G9qcFKsiRDnF8vvRjOx3MHc6ShH3kSBNxQczPO+kgbprnh57L  
kRKEJMuei9HhrJFkhEa3HEnzUeNAPdgddOdyyrF18qQemdD1jhJ0mJ09EPJk  
tzzpZr60or4kHd5/+7gopylPktVpOr5dmg7N57XiaCR5UkN5+OXfMnTw2nLr

Rj6BLxnLJTXJ0aGS9nCPPhG/vbmlLFeBDptiL+McRD7c7vpgzF463KEsP/m8  
KkdyHVLgclUm9JrJiJ1plSNt9GpXPLiPDk9thoKupMiRXs/dPLFLjQ4z1tjs  
I3ZyJNurSoF/1elwdLKX05tPjrTK2ZXUrkmHyfx/za0FsqSn8ZHolTYdNhqH  
FA2ayJJMRfYNxevSYcKS9PdshwXpNrWHy3M/Hd5dOfidx1qGxJCL3mukT4cC  
08t9+XXSJP0CNQtJEh1s2xVYZirSpCHdvsBVAzpEFRUFFMdKkVRMNfG3h+lg  
PCmT4qAsSarxHrKQM6MDZ0Jf663D4iTv+fgrHMfoYJk0GWD0WIwkeF0v+dtx  
OtwkN/qv/thJcrhPHmaeogM5KE/23qVtpMVXpCCeMwR/DL87xCdAkI9Mfjh5  
kQ5sullnP+nEYV9uGFVUexL7eC9w9Kj4AArk+TWS7k3EJ7r++2o/iyp2mKic  
8Sf8NvN1qDeSDbfVX6yoD6YDbz12mospgN+NOD2WE02HraTFF720Erj676L8  
6zF0eKwb2K1/eg/e6yYSfDKWDr02Wo8MD0niKubd3lvxhJ8EXY8cEJbGW0TO  
Kxyi08F1Lh23uSOHh9+t+CnEJPx42x27YyOPS6/sKR1PokOivcZWA0kFPHhw  
xDQ+hQ7qM7i0bqYiLpbr6d2VQYdRD8bN3c7KeLV4g2bOMzpk8/pvaeFQwX0p  
yv+uPaeDlofYqevpKnhF0Gy8VA4xn30dLhub9uEekyetF3Lp8GV1+oCJqiou  
aF8o/imf8F/OMQflIFXc9WDQS9/XRH+/0lSuLanim4s6gw8W0YFku/lfqa4a  
XiyRb0Jv6ZApbiFDClTDnR4k84y/owM9J+Pdj1w1nHfjSlNjCR1euxpVFQ+p  
4YXXzz249540MYVXzt4SVsftf+JO5xEdHi77xmsdUcfzOyJ+cX4g/Cn0hv1f  
sjpuYzjC2llJh6zXV92GK9RxtjLDyBdVhN9HOTJthtXxbJVMs2s1dDgjGNN8  
iF0DP5XOLWRRR4ed6UZ/43dp4MtbPXol6+nQsnhVWVJLA38aXf90/jPh32sX  
r08Ya+DH/+71qWsk/Mg0WvIkq4EvesVrPfyPDsp5lu9eumjgaf0z/3ya6SAm  
01R+y1sDNz1pUQOtdMh3XZBR8tfA5z6+StjaTgePds4lmp8GnqK91Wasgw6d  
PbrmmZ4a+JHswN0IXfT//09QMnHSwGdEO8bjeoj3Bty5bqc1cGaCToFDLx2e  
+4r1jIMGDusehKj1E/erwbz2jYIGPnl5CTgH6CBR0R5ZskkDTxw7u6FzkPBr  
we/dvdPq+AE71Jw9TOhdP57DVauOj3wWT746SgdHKZaOZIo6Hk+66XxinA5b

Lh1o2+atjmu/GlSUnKRDnc12SpO2Oj4gdXjuN4sO0/vx61oravhdxtP3tdN0  
MLzlmbevTA1X38AVITxDB33aGeWsIDW8N9zd3GeWDMqdnzfH7FXDb8/UCcEv  
Oqy8WnYq7IHfVZwU+wR/E+8rTk5HMkoV72yNezY6T4equnup+XKq+E2j7z7F  
i8T7yGi2il/dh7fsLVg9t0zcs/L5uvBeZXz/0KSP7T9iH2F7egL6lfCMJKm+  
U2t04JpmZkY378UD1zPfH+VgwGmpkp2SsQp47/smxUPrGWC6tompcUIeN7zE  
m6zPzYB9d2YmkznlcOFv10LU+BhwxpNH8z9nafw6/d343k0McAwUr1wWIMLH  
zH5ay/IzICo3jb61eg/+tthFS3QrA4YWdUQMXcVx20SzX5yiDMidSjHifSCE  
VxjfdloTY0As0zwtz1QQV1jDm/6KM8Dzz6NrDzcl4Ete6i9nJBnQICJ8Y082  
N+4s6S0+Kc2AK/IFhp5FHHh917P4YVvkGyHIUCIWMrqGHR3Z4dykyILpWZVef  
8i/EuXLqa4sSA956HpeVEZhA3q/vmTaqMEDs5b4pbno3artYU1KrygD/Uzt4  
rOqLkP5uNoVKdQZYcD8IM2v7hD1t10sq02SAkZT2noNPe7FN9y5zv9NmwOz0  
lqueP0awoEN5Qa90GSATeDDrKomF9f8ZG83ZzwBLU0exYdUZzOilhFWmPgMO  
99yUKwydxV66nqlKlZHARpYjbpDn9h2MZrGQ2CA11p1njUL+xmS+MT+iEG  
9KVvPx+gN4dNxHALkg0Z8FWFfk+/dA6zMDgYEWvEAL59VH5nvt9Y8XzYbJQx  
A7Y1U2tUIH9je3KLzt8wZUDSYU5ysORvLNZ55kuoOQN2vbE29fs+h/3aLk8K  
PE7M2/JfqzF5Djvzn1OerwUDQi08+XQ2zWGVtx+KeZxiQGIn/3/ebr8wRf32  
uAuWDLi23fGfWOpPjPpr8/I5awa4H2wMDHs7i61kGXva2jLgNTtVzv/CD8zl  
/K3uU2cYoMqfELBF+jvWIFxmfMyeAcmc/lGkQham1TD/7qgDA6Zlu3adE57A  
uPQ8GPrODMhe8Wxd7zKEZQlanJb1ZICghs4cM6kGm6re1fg3lAET6R7hVmWj  
KETvqkNLOAPoGWyNnF8nEFdez48X1xhQ6bJDrJI1hSRoTEH7CAYcUb1moj0x  
i/K5Fzi0Ixnw/ZuX1cyjX+hAuKXWptvEfu+rWhRkzyFr5y22eAwDqrecZG9X  
WkDD7X6TjFhiv4Hv1P6eWkT+Jl/C/O4xQHGB164/EGrZUobjRMYMsynTR2  
/IviVOMeSZAjf967NalluIS2P51U+UthQJjim5Xmzcsoc5txRTOVATs3TvRf

w5eRRlzmyRd0wh+hEubJJ1dQxSrN8C0mA36VXmCLqVlBxy9dCDz7gj3jnfv  
nov+Q19HP6zXfMiAld7dKmd0/EMX7SSYGx8xgPd4xm42x39ooeG6/GgqA+aL  
jlyXzP6hSOgrQWkM0DnD75K95R8SKDpgrnjCAPVo9n2+L1dQqlxyr+9TBjiL  
ah7qlF5Bex/+8TmayYAdCW6BX+4so+LNNmu7sxjQw/XWKWNwCRndekP+k82A  
T4pNPes1lpCjx6XC7DwGSG8ULVQv/4MYOtN/+N4wINVsw39u5HkknWMA0/KW  
Ab/3534fKvmNXolni6JiBoSx39nINTCHGta7kXzLGGCdnzznIPcLrWv7Ftn0  
kbgXSgFJ4o7fUcJRknB2NQM4ker9Yy+mkNj7lMyIWgZ4We4vpPydRNpP7D6p  
f2ZAVI0ST1fuGPL2b91Mb2GA/Nz1hJZ7A+jvsFqaTxSDamaE9x4070fRNmQ1  
ow7C7++Cstc9/orSSccsF7sZ00JDCxR71oFUXueM/veVATeXt9pmHG5DZTK8  
wVl9DDj28bG8/M9m1LGx9oHdIANEupu2WS3VI5ebMnvVhxmgtGKte+J9Dfo5  
F1nGO8oAc+fNCoefVKKNX+Hb+wmi34DTQ0ptb9CD44/9aSwGXISLm1sP5CHZ  
yn/rfKaJ90nJGLLe/BgdzC6VFp8l/MazZrJLi4oVP+bOVf7Fg1zK1/E9TMx  
VYalBvabASIXEutrXuw5/fSS80XGMDaLn9IUPotJh45c9D+D3E/vuQ4Nv5X  
itFDD3zyWiL2vXo3emUixzb6x1iErzBAMmbrJ/SByzSrb0zdpUBdm8jNX7T  
K7Ele8nzyWxmQeIGsYdzPmIBp/3GstmZcLFlXQDDowqbMCnzKeFkwnH5my4y  
X6qw87Bhvo6LCWFz/oPyHVYh7b11S4eJvx2j3Xpvl6FHVPO4JjgZUJFyS1P  
v+qPWJXUbOziRiaYUujt3LMqsQM7MUFufiYMdXCZjF19wF4LxD4Q2cIEx+Jc  
m+6mckyBu1NCdisTVpLzeLqry7C0f1JZWsJM0MyvzntJLsESW0it5Q4mPKkT  
WAwof415Vf1sTdzDBJ4f6ePfk8jYUCnp7BMpJrBVSPf/KD6LnXkVN/RKhgkS  
W3M2jInGIuNUmZ9NCKyg8U+P3Od4hspp10IG9jKBJaAv1c6Ri7Tjytd+KDMh  
/5VK223XV0g6xG4zvzoTih4WSTDK36GHvpl0cU0mLCga7Dj8ohQJus6JqWgz  
4RXbucQuR4TunoWnmC5Rr8o28lJfOWI7Fb/32H4m2CbgASKbPqBg457X9vpM  
mLDlBafwVKIZktx+bxITgoS13PX6K5GbVuCHcGAC5/YRKdG4j6hv7wfjuENM

qFOk7FHcVoUsJtc3JRsy4brlSnEDswo1bD9r88KICd6L39p9N1Wjw/xZ/SXG  
TND98MnsU3A1Kl0/7/rJlAkaDIzAtI5qpLZy8HuXORMuhYnn3VGoQVm/EgIn  
jjNhc2VF41n/GrR78uvyogUTRac7X9W9qEGMb/KR3KeZUBC5djm6qwZt6rjC  
u82KCSNWrsrH/tagqIZKiqwNExo4fqy0baxFy5X807TtmHBTb+ZPu2AtulRi  
n3bkLBOEM7wxHr5aNPkyW87qHBPSp9ePSs3XIMfMhXyX80w4UGnFO9hUgzpT  
DmsHOjFh6b/F2sVHNeg4lYwiLzBh7sMdXQn7GIR9t8+Q6soEfcP0IEG+GqR/  
U7HhiTsTvrMPpES/qEaFQcGnX3sQ+l98q9bcX40Ufap6PngxoW/0wMb2kiqU  
fmGLc7MPE4ydybG7FarQ9jMokwN+TAj8HHK24c5HRLbl8Z8NYIYI/kBtb0S  
cR/9s7h2mQkcQoHnlQUr0f8AaZDTAg==

"}],

{RGBColor[0.880722, 0.611041, 0.142051], AbsoluteThickness[1.6], Opacity[1.],  
LineBox[CompressedData["

1:eJwV12k0VmsfBnDjkExRmSkZkqmIZL5kSIP5efDMG6XMUYZIVEioDIfnKAKN  
ckhEZkVlqByOUtlhUiQdkkgI9e73w157/T7ca+219/+69n0re4e47ufl4eGZ  
Iq//382+9H80FeexPKKboFN1V91y+PxYxX8RQ5YrY1ODw0r4ENepeLgsYsry  
zygpH62INeh5Z0xji1iytNVXbeyTUMXCbIfNsQhR7LZ0tu9z3oqztPqxq5mr  
kBEoYcxOMsTlerESYX9JCJeWD3+tMMKDo/WbB2Sk8Cb7Yd+mcVMI/xAzPxKh  
iPDgtiqFj1ZQo0/j+ddhHX6oRP8xM7gD0kODbwoy1y008H7RmsfW2GSuf03Q  
fw02tjxuKMmxhcPSoNZzGXUMf9Z5Hrxoj+xYfeNDETrYUf3Z1p3fCfk6QxdU  
vHXBaP5sLF7jhOtDp3++cNgMp/3KX0v1nDGYPz2cn7kF7nxK9dMDzpj+ZX2F  
318fsjXUS6bSrph1l6UMD+tjvajR7kZvVyyUT/PVU7eiwn9W636ZK3g4ub6B  
VgZo06V54YSZGyTvTW96JrMNI7802aXsoUBK+uGrsnPbUNk7weFPo0A+Jdc1  
ic8Im8xyY82fUKC6zmbKeMYIk0qi75ZsqdgWl1tR0GGMBof8qv067qBb2hgF



R5hDauDXSFGnB3RPa+brfTXH2X4v1olFD/D2rOKfD7eA4wStf5eOj0rZQ09j  
wi0h9s9g162znhlYVpr0wAolFgnBuygYcK73F/9B3C3zC/fMIiGp0nKSitM  
rPDv6cQPa7g0FHcLJj6pt8J0HD1RfYIGZ3afq2v9Dtz0mF9YE0+HycmdAgbf  
dyC46Uf5yqt0qF5vqF9rbI2nNz15TTro+D5VsH6gzhrC/npqVGEgimKDPjl1  
NphXYGdMpjCQVjhSaPXNBkX2y53kShilaHOjqmy3xZu2Vp2idgb2ijo0jdfa  
IqCko7HjNwNzeQlpQbV2iPG7+b3Dn4nXLUfNnRbscLklVloqgYnOd//NbDHa  
ieXRvnov8pi4pP3MY65mJy4K1Y/VdjFh13RZLabGHh9nLG+5qLOWZURygPnV  
Htx43T1xpizl8SWlWWzbBebpwCcGzix82hP4ZVnNLpi1RPpbRbHw57/bW5Pv  
7MaVwJeH1B6wcPJ36RH/+d0QGTQbfN7HQqDKOo29hvnvG1bWuH6cBasA/vPi  
d/Yg8/SB/ecE2Zj80cvMqd6LYfnVL3jt2OhTsl0VNbcXdXahOi0UNu7uqHtA  
M3BArN4flRt92MhMyddUrHbAr1MCeT+Ps2EqF/DtSpUj5sbXFUzdZuPhaPjM  
rk+OyH77WJdzl429pfETnzSdUNp4NSjjERtss5yXpkVOuBF0UMZ8mA2rW8Sg  
n70zflAMQnoFOUha7fvSzNcZPCtH7/hJcPA4MqBPPMEZ2rJSo0/kOHBFRNed  
e86I/SBmO6vNwb7e1KZlRi5wmdbnjppycMMwo66P4oLZcVmXcXcOpnjzqovD  
XJC29LKnkc1BhHdhmUO5C65H2D0eDuLg9JeavFw1V1RVtS9uSOGgy6Ppz0Br  
VzRQ5T52pXOwqqn1D0svV0jvkqU7cTn4M6ErbSzPFbHJwt0jVzj4a+3oMb01  
bnD3df68q5GD6aPvo/j03ZCQX+LS1cLB1tf/Hel3csPG2pHP2u0cNF1fCIxN  
dUOQCZJS/+HgbyNR1iNeCpT1jMV63nIgmSdJy1tP5jDSqpcywYE7jww1xIKC  
S2xmc/N/HLzu3OCwNpq0uaKx6TwHM7Tt5l6fKeDes7hzlJeAwV1zYwNxKjwE  
3K448xE4usHaUFCHiuaZcAt5AQK8Hx10bh6kwsLaZn+aEIHVx3wUvw9TYcw7  
+OCdOAHpkYOyXUtU2DjeDOFIEMizCV57Wd4dfuKXMnskCaiKHhW19XDHq7Wj  
fBlrCWzLP7eU3u2OS9wWoXw5AqVFswbdH91xa5xf8qE8gfXF7oHCQh4le5sT  
+kaBgHCF0r+J1h6gXq3t511HIL76pOQDwgOx/zzXFVxP4Gvd+C6e4x5k7zCP

L1cmMNJaXhdd54HfX5qL320gQG2XnKI97oHV2pK9j1QIPH4csXF+1gMXNZf0  
FqsSuPPMlieE7JkTb8wdHNQJpIx1H95X5AnpsPlS200Efn/QLy2854mUwytN  
v5A+Mp0z+nrQE2JdfEEXNAIwFtguNGkaHO4tbnmhRaBv8X5yJgEN51QKf/lr  
E9jNs7HlmQvZU+2x499JGwh90nVMo0HEecMxAV0CJaJuvqklNEQX3PJJK0k  
WXups50GZv7Ai5+kheTjRKYX0dHZcrt9aDOB4+veWscr0RF9pD7CbguBOZWD  
Mc2mdEx9EZb9i/RrbfFJowg6gos3XPTWI+Cmd1g5PIuOE2uEympJdxr2e96u  
oCOuWWPVCn0CFiam6Z/+pmNeM3fljXSVxeU07Y/k+rFQzYukNayX//ZbwUBk  
+GOR16Tzdx7YVqzGQJ5PwwWFrQSSnTdfUyYYkBs7LnGW9Blla5Ady8AjRQnV  
e6TDaAur8y4woB+22nCK9ASLsWeglgHND8ke0gYEWN73Tko9Z+DkmSP55qSf  
+qo0uM0yIEIfUCBI2wec/pwuzsRFR4ax46SbQz5qdGszwVssJ3KBtP4RJ0J4  
NxPs7uyiStLFUVVc+wNMKNX9rm8jrRAR3ZNI9urT8mrvF6QzT8QIPChkol9N  
4uZb0oJjw+Y895hITQ8tmSJ9LMU63HyQib3e+gfnSM+eKy6L/s5ElFjF9wXS  
B7KE39VKsUA8swv+RnqQGyI/v5WF6ezm5/OkXfKeueq7sKDZRFjMkG4vMEoJ  
CWaho8Wm5j1ps2sXW8tSWYhUOr5nkHRlye9vH26wM0mkLNJNWr3cZ8vGdhae  
9ewQaCadd7vjwL63LlzKLOwsIS1Rq3W5kleNL6V0w5mkkxrPv3ityMaIVcHA  
UdKfFiNjcszZWN9a3c0g7WlGrHdksRGezuo2Id16zL6NP5aN7Wslj6RIazZv  
8W/OY+Ne9S6tGfL7ZC3Jilc3seHTF1PcTvqn+bJq7UE2YgbWBV4g3X03d+mi  
PAdD27lCjQs3/64vcjPl40BV+hi/6SLLop3CDA5ue4we6iHn5UhlWEb0BQ6M  
F2NEGKRF3pzJLBMh0KKSfMqdnEcs+7Uvmcx5g3DLsDjpcOUwo31kTg53yq/r  
+P88e9EH5fcSuNorHr6ZdOWopnpqKofns98rj8h8uL97Uu+30gu9kt4yAuS6  
FD6k2cp5QW7QKK6IzOM91Wq2sqYXuA8H9pmT1tift3xglxciPup0B5P5XRwL  
dLA/44VKL/2pFg0CBe9F36iv8IaioFSuhhqByUmnFe/4fbDC8Na1LYoE7OY+  
fKxY4409dpSe2+RzFy2d6oIV8YH9jdNOBqQZq+pypK18MO/c5mVI9lmX4Xq1

Pcd8MGAVtXGLLIHy+Bmr27M+SJ/z7FtJ9mGYVEZM/PA+yNjw8h0g38sPq6fT  
CvW+mPnm8NB1joMU6cHEK43+cPz7Vt22Qg4Mv9Qnh5YGo3c2iteW/H/tFzgz  
2aoVCtPL14TVlnFw6PW3idBNh2E0JBGnX85GyHM1ERv+cPDL23bGe7FxrMds  
rL4/AmHbhe+skGbjUTI350VvFPw+XCoS6mBh5YFbgWv/ikZCpkaaaiwLqXzC  
8oslxxDWxy/zSofcX1xzzksoOI41EqP6T0eYcLyzie9Pk3hsMy8/ezuXiVsL  
XQat20+Q+4eOQIoDEyld3ZGLaifxvOIk/0MBJvhPzKoLbTwFu29PNKQaGRA0  
Eq48qJKAv34uX30+lIFTcScdBsQS8Sr8xYPrOgxcLpZ3VxRLgrDqPPPhOzoM  
vVeHhv1MQpzA5U0HC+lwVeI5IDt+Gm/XBHjzEnSIN4g9ynqbjDhN59w2WTrs  
JmLM1/1zBvYvq+6PvqRB8etKpeP/pMB7/04T2ywaYvjPD+h2pal88cb5q040  
uBWHFs/UpKFYmI+lJ0HDE42IN4l3zuJQYaC8ercn7poN6GhfOYeIET5H/XRP  
GLnqUVXTzmNatmGIKMUTN65Q5yJt0qE4osR/aLUnwt5b7fRtSEcMu6attd8D  
IvKWzhYmGZiM8aPvcD3wlhswml+ZgeC0SekEpeOZ0t631DPxNHAIDlhFQ98  
OPmYe/FaJu6/39jqNuaOjPpKd2mFLJtmRJY4lrlDaKTKybG8LNBKDMsrhrjD  
5rSCbqrcH3jv40Fft9UdTZF3ZTek/4E3K0Qm+n9SwecZ2lgkng3lqSnXmVYq  
zpxwGy9Nyoa4u/bZ+FQqnmpV/GItZuNuYtb8dXcqPrYp/v39aA5U9MpujCpS  
YVXSoKo0k40Azd80hn2go06yYjnObA5yI68EnJmgYEsOZav5XA46csOiCt5T  
oHRq2or5LQd2xdEV3WMU/GBu4Fzg4eJMgtoFrVEKbq9KyZWS4KLQ9pTb+1fk  
+SGKJiauz4VF7R6GbxCF40vZysZcFF1nVt4nDxfS07/oqC7jQuK5/fPOY8p  
4HE9q+VgwoWy5c+Kjk4KhrRa7VN3cCHT+aV4UxsFOcMapwTduOg2sT/6qZkC  
0RfhK6WpXLTebyRWke7oup+h7sHFkrCFq3ITBWH1zAJbBhcuykFubg0UOGal  
N5/y4WLXKr/u2hoK2s4M2WTt5yKMYSfQe4cCs3jNrqiDXLwe07WfrKZAM+jh  
q9YALqIX1k0qVFFQ6CPh3RvEhUb+xt3bbIMgQ2d/GAnhQurB9mqnSgrSnUsP  
zYRywfPVVcOvggLBnd8Wfh/m4kZ7+PWTtyj4H6Uoix8=

"}},

{RGBColor[0.560181, 0.691569, 0.194885], AbsoluteThickness[1.6], Opacity[1.],  
LineBox[CompressedData["

1:eJwVvkHc81I8Dh68hidCQCpdKyKrQKR33JtGyDmedE0KdecZ9+KJQKKeyL8mI  
MlJCKYeG0rRLfVoCRnJKdG3+vX743k9/z6vZ617AN1zLolE4v3l/6YKu79y  
pEi0ePVRcz/yOlr/mYGKUW4vTSVr2ZRsGAlHnygEX+G00b43S/RfsZZG28ft  
tkncXzSVo+0tsQsUMT352CSSuxgPrPjr+ka0cMpRMHAXVRoW4sum9xtsQZ5A  
slScvRQJi50lw/7TxoNwwaaelSsQMdq3eVOgfispEEIVwGe7FTgsRdUyDsd  
JL02X4MSv006QhdDyPa+eZefqgh5nd8bhG9p2GigfUmUvQ7i/kvFKleNYP7r  
jfrLlcoI71QI9NMxQUaU9vZARibkry3du2vbHuRq9p5b766FSxS2bHTzHhT1  
JvzXZb4Jxtk/DVVYe/Emd7w/N3UzVtoxtcfD92H8985CEbY2LsxbdPtKujkm  
Gats+/u1seJ0w8p8GQtMl4/PF9jp407hplusdAuQXL08f110ITancZ83zxJL  
745vfLGSAut4WrxnhRVWYDa+unKaAoXycNGcISvIBWTx4ufrwTZ0A/v9Gmso  
rTEZ2z6hh3eqGgWlPGtQjmZV5D/ejtrl9z2LHOhwopno+XMN0LWs585Ukw20  
EtRyt3w3gDF5QuzCrA3mtkmLfAs1RL5MQWekqi3KWL3PI0JpULtfo9IZY4vf  
hjtumdQCJjkqT666HYbcy9nKs0B7la/BMls7PI9fS16o//dj4cmxPx2KG4V  
jWsSGKHRQ/tg91M7WLE66XSBMUoP/X7d68KAfzZAAt0ZY+g9evnSKYYBpaJa  
gcz2nXhWcnHE+CIDM2P5ij010/HJS3/9gSEGCqL8xl1rTFBUTYtXZNtj6vyC  
RL9bpuiKcI5RZDig7164geW0KR7ZeefmcBzw50PoxGY9MxBUCYmKJAfkaLyu  
n7pphmyzLqM5DQ4wrc/bEHFzN1xNtaa6lB1x9vW2hhPVe9FPe24R9tYRsX/K  
Qtf9iLK0fnHju+08F2/RnX/1n34bmhHuy7uBCMfkTNS1fuQTe5Y/GCrEz7P  
djAzB+xH2nG9a6nxTtix2udH4XULzKlZkqoi74zG96ETe75Y4Gv95v0lGs7Y  
XxY99EXNEmtjhyxnqM5gUTP/3VfGcz/ILIFpF2cYXTvw5vBuKwRQ/z2kmu2M  
gx28+jl61hA7EjhdJ8VEydaUmk5ba8xZKBIVpMDEWFbmjeIga9gaaq7wV2eC

637hinm5NerYPBO+KRMJwpvnszbQMVD5meQRwcRlmfeRW5bbQGKPHNern4nx  
8MGw+do2iPlxo8tnhAmdvtGQbksbXN20uNB+mon6omnfKJ4NzIXefh8lXdCi  
t9jl6VxbjHh+Od1PdcGE4zYDt6+2kAoX3ryT7gJK7ulfya0MWLSTTz2msFBW  
MKnbOsJARR55UAcsKBYzfMXF7PGE3fYrdQ8L4hXk13E77TGon0RXY7LwtqG8  
5p8ae2gMEdqN0SwkDrQGHyxwwLsntbe6HrPQpyH1WY/rhKFju+mtFq6lrzvT  
1afAgtOD8kpZpQP4/Nly4UcRD7TcbpJZt9oNs0bPx+UFXiCMGQN0oRsSZd/E  
FdaxMbNbcx2jxx1bhYITnDJ/DIg7UmZuecBT4uTnBnUOpP1cqlzjDiKw78cQ  
Z2MwrsZvrm9x80TAyw0SjIKhiH7ZEB2l6YXINuqAoJuL7i03l1GFXnh6gp/Z  
1RGGnGchbpcee2OR9zVfmcv/gEZhrziHQJvvrjcz9JluM1NN/ZgHcbqS1ZH  
j+cfgbPyifsjamxYVG+cf1Y/GhWecwYbB9m4Nt2s27AtBuvTp3MSq3yQ2NxK  
/NwQi0iRTuqAny9EYiaVxVSOIXhilVwPxQ+ieuKVh9YfRwA3zmX5rB+OHY01  
75GMQ+kCZVePcn/kFcsxFCTjsenFM+ZwQAC2ui/jBP0Xj23GfRruSwJBJ508  
V31KgH/eqSLdQ4GQqpV8mvbhBARvfhMLeRgl06ElgzXtj+FkmXD1rBwHcT8X  
kY+0j+KU26oP88I4iBA506PVzEOSLmlhSwcHNsWc4ombSZj5dq+mWikITarc  
d3HVpyC403LvVIQQ7lB7NDUKT0NqVtVqui0IevQtdkpJZ5ATHdXSviYYJYV2  
U4RJMjKY9++dDQ1G0KCRmVdtMubIP6B2NgZDQo5mZaifguG3Tz+8WhWCD3yf  
97mVKahKkXzAORSClxlL3UuUU9HoUtV650YIhmOf8bMvpaJNsV6ufEEoUgSV  
DFn5NPCyMve40UMh9ra0Kfj8GgrcY8QyCkNhkiCvxVudjudr9zWFTYainriz  
al1yOs6KXy+z2cHFfAdOXYFUBpxaxrwTTnJxMsbmU1l8Bvr0heeb07h4rl7x  
2+VnBj6qlqd+lyUw8lChZSY8EzLz2+tsPAgYldYqkScycYPc3vW1hEBNnugV  
zclM3CWZqapcJrA501bHYCoT5blmvswyAuRj40bMH5mI8h5qenSVwCxxnes5  
Eh/vcmqGz1URqJJozFqxhI9eadn8v7FQCnOUINLm4/C8dz9j2ghk+xdlkHX5  
eJJRmVfdTmCp1Bei8JHbhaZMtxBgEQ/pW6uz4fH/nZ9q04CveoNu3nGfETW

FhQq9BDI7Fc9JmrDx2VqnLD6PYHFXaGLZO34sC12bxj6QOB48/0UZXs+6toG  
YuQGCAQJmPm7nPl4dbX/VfQgAYu05NvHPPPhQGa0c3TtK4OHJXpM0Tz6iUlos  
o8YIUkPvmgu8//adT7t0bZyAml/jqwYfPpjb125c/pXABY8l7h1+fNyYGmaY  
ThJY6cQafhvAhwLblQgTEki2Kguc4PBxQSS28fIUAVGzH9N/gvnY1U1PfvON  
wP8AyAr9vw==

"]]]]},

AspectRatio->0.6180339887498948,

Axes->{True, True},

AxesLabel->{None, None},

AxesOrigin->{0, 0},

DisplayFunction->Identity,

Frame->{{False, False}, {False, False}},

FrameLabel->{{None, None}, {None, None}},

FrameTicks->{{Automatic, Automatic}, {Automatic, Automatic}},

GridLines->{None, None},

GridLinesStyle->Directive[GrayLevel[0.5, 0.4]],

Method->{},

PlotRange->{{0, 1649.9066}, {0, 391.0876025}},

PlotRangeClipping->True,

PlotRangePadding->{{Scaled[0.02], Scaled[0.02]}, {Scaled[0.02], Scaled[0.05]}},

Ticks->{Automatic, Automatic}] \) \! \(\\*

GraphicsBox[{}],

{RGBColor[0.368417, 0.506779, 0.709798], PointSize[0.6], AbsoluteThickness[1.6], EdgeForm[{GrayLevel[0], Opacity[0.3]}],

{RGBColor[0.368417, 0.506779, 0.709798], PointSize[0.6], AbsoluteThickness[1.6], EdgeForm[{GrayLevel[0], Opacity[0.3]}], PointBox[NCache[{Scaled[{Rational[1, 2], Rational[1, 2]}]}, {Scaled[{0.5, 0.5}]}]}]}},

AspectRatio->Full,

BaselinePosition->(Scaled[0.1] -> Baseline),

ImagePadding->Automatic,

ImageSize->{10, 10},

PlotRangePadding->None)\)      blood

\!\(\\*

GraphicsBox[{}],

{RGBColor[0.880722, 0.611041, 0.142051], PointSize[0.6], AbsoluteThickness[1.6], EdgeForm[{GrayLevel[0], Opacity[0.3]}],

{RGBColor[0.880722, 0.611041, 0.142051], PointSize[0.6], AbsoluteThickness[1.6], EdgeForm[{GrayLevel[0], Opacity[0.3]}], PointBox[NCache[{Scaled[{Rational[1, 2], Rational[1, 2]}]}, {Scaled[{0.5, 0.5}]}]}]}},

AspectRatio->Full,

BaselinePosition->(Scaled[0.1] -> Baseline),

ImagePadding->Automatic,

ImageSize->{10, 10},

PlotRangePadding->None)\)      liver

\!\(\\*

GraphicsBox[{}],

{RGBColor[0.560181, 0.691569, 0.194885], PointSize[0.6], AbsoluteThickness[1.6], EdgeForm[{GrayLevel[0], Opacity[0.3]}],

```
{RGBColor[0.560181, 0.691569, 0.194885], PointSize[0.6], AbsoluteThickness[1.6],  
EdgeForm[{{GrayLevel[0], Opacity[0.3]}], PointBox[NCache[{{Scaled[{{Rational[1, 2],  
Rational[1, 2]}]}, {Scaled[{{0.5, 0.5}}]}]}]}],
```

```
AspectRatio->Full,
```

```
BaselinePosition->(Scaled[0.1] -> Baseline),
```

```
ImagePadding->Automatic,
```

```
ImageSize->{10, 10},
```

```
PlotRangePadding->None]\)      gi
```

```
Show[ListPlot[vn[[1]],PlotRange->Full,PlotLegends-  
>{"blood","liver","gi"}],Plot[{fit3[1,t],fit3[2,t],fit3[3,t]},{t,0,1501},PlotRange->Full]
```

```
]
```

```
\!\(\*
```

```
GraphicsBox[{{{}}, {{}},
```

```
{RGBColor[0.368417, 0.506779, 0.709798], PointSize[0.016666666666666666`],  
AbsoluteThickness[1.6], PointBox[CompressedData["
```

```
1:eJxTTMoPSmViYGCQAGIQDQEqDndv8k7sXJLrAOHbOfw9eW4i98N0KN/T4XrL
```

```
1Sucz/0h/IZAh5cuR45a6DlD+WE03D1sViqWDIB+tMPDH/kz3FfZQPgOCQ6v
```

```
5E9kdZyxhPAPJDnEula93DIjyndIdXDr54hWy7GAyqc7lN3QPtmrBpPPcrjn
```

```
x6kqv9AcKp/joMqeyErnC+U75DsYdm2OEV0E5T8ocChc+EtBrx1qnkKRw7Jt
```



5jmSN6HmLShxMDh8q/jLJ6h8QoVdAZ/z172XYOprHKI55Z2c26HqH9Q7s07c  
sr6M0RrCv9DokO+p/2zfPCslv6Dd4deprPCSJ1D9GRMcWHf9K7PJNIPwJaY6  
3E4lrX7Ab+ZgLnUgesHxmQ5PPRZy55WYOgAA9BlwfQ==

"}],

{RGBColor[0.880722, 0.611041, 0.142051], PointSize[0.016666666666666666`],  
AbsoluteThickness[1.6], PointBox[CompressedData["

1:e]xTTMoPSmViYGCQAGIQDQEqDvrPGFTcRdwclHw7h8f/XyYelkuD8j0dSnpK  
d2vUF0D4DYEocS+PsV68UQTlhzm4Gq9Kr9EsgfKjHZ5/M+ed9g3Kd0hw8D+/  
e6NDeimEfyDJ4b3b1dTnL6F8h1SHpKPxnh5WZVD5dlemy4Wvj8RC+Q5ZDr93  
vDIW2AmTz3HoOimd4DYPJp/vMO/5l8RFs6H8BwUOoexdmRuOQvkKRQ7z99SV  
H9wE5S8ocfjkZGXTUgHlJ1Q4KP9Xv3VBFqa+xmG3/qH8uF1Q9z2od7BTqXnv  
bwTIX2h00BnOpLmxHeq/gnYH1VRH8cd3oOGRMcHhzf2vM4VjoOEIMdXh1AFG  
3bn+OQ7mUgeiFxyf6fAwUv2y75QMBwAONnnu

"}],

{RGBColor[0.560181, 0.691569, 0.194885], PointSize[0.016666666666666666`],  
AbsoluteThickness[1.6], PointBox[CompressedData["

1:e]xTTMoPSmViYGCQAGIQDQEqDioH6g7tEDBxgPDtHJ6XNrF6/o2A8j0djiz3  
WvqyOxbCbwh0WCjA2D5BIgHKD3PQmF3U+j06EcqPdvC4ZdS62TY]wndIcGh+  
7z57y9JkCP9AksOcf+6Mtg4pUPIUh/ORG+ap+KRC5dMdet3s1v+wS4PKZzkc  
fMgqqDkvHSqf47CYg2VqT1cmVD7fwfvck2/LmqH8BwUONW2nW5f2ZkH4CkUO  
B903Z2zYmA3hLyhxMLQrXMrckAvhJ1Q4bC/I2sgaWQBvX+PwVXaTufvOQqh5  
9Q53ziVbnnteBOffaHRYb169MXFnMYRf007w1kuNqaAAqj5jgkPs1F8Zx21L  
IHjYqQ6Ry09913IV7mAudSB6wfGZDkc4Hl5MK6xwAAC/4Hbr

"}], {}, {}, {}, {}.

{RGBColor[0.368417, 0.506779, 0.709798], AbsoluteThickness[1.6], Opacity[1.],  
LineBox[CompressedData["

1:eJwV1nc4Fd4fB3BEiKwKZUdWkb05H5usa1x7U2RGRrZkU0a4lBCVQlPiop1U  
RNS99h7h5tpZX/nd31/neT3nPJ/zPs85n+c5Qp7BVudpqKio+KmpqP4/aqz1  
rYSwUiED7MWnN1tzYSxn5tmfiBF0tLPNSoGUAwlf+C7XRSyiXW0wfh18A7qn  
VW2yI/YQZ3lCx2hdFmS9aH92xl8GyHr1z0e8MuFpaKjyBPdBeIX3XhWRzIDN  
1Xa92IjDML/E3PR6lhWuO+Bn7uWzAQkb0NbakwLleJZHTH4ccHhg39G1Kxk+  
RuHPDnBzwnlh63glUhIQBljW0DIXkLIUurGHkuC3qverB+3HQfprO/Vv+avA  
tMOiGRbBBxrOYY/njRKA19GbashMAJqxaVJHCHHANTI8UZEvCLXcOnXXQmNB  
QlPuPr3fSXgxfYZMPxoFcovDB1uwwrDC/mH4Ts0VUL+T5hukLQLj/vejY1li  
wWxv+DSBWxQlpu+lgrzCwfZx2vV0WjHgZDa/ang+DNxc5JbUl8UgzdCjxx6  
GUJep72objcAKhNNqdinIRAdKHfUtl4SFBkEs1xGLsE1vpFwxvLT8CSVPYv6  
2CUojJNTvRQhBdUWx/WzUSCUSY3cEvaUBtlLg6YC0/7wYCTtP6LZWdB7EF3f  
W+wHw2Xksbj8GcBW8J+pP+sL438/5l5hkiUajSm9cDYfmDEv0baKlwUuhqJH  
uf/OA/mfbhWdnxyUDEYSnKi8YdX2uM3YmBwwTVaiKQ4v2HxCpsVj5WGjrdY7  
TMYTqNxKLgRoK0Cxp+ufqkx3oG0M4jJoVIAukm9iVbYbMLLqfRGQUoSCyqR5  
VU5X4HhLlvjRQSeBWKxn52dgJPr02DdDSWI6PjqJM7tCDzBJVmptMqA6pW+  
lE7ag4iA3qLqsjLU9HcJHai0BfHI42VHLqiAw/q1A5WFWJDqJpsvDqmA+L3b  
pc2FNqCUUPKsol0VphY410jxVqDWF+QRrakG5HE9avEhS0Bn9Ths6tXg5dr7  
a8X0lma0Rr5MX64Or7raenZ2zMFU+ZPIxFENiGp4tSuUbQaWOSWE5kwNOKW0  
8AAjbQqOSE85KEITeMp+ITyvNAbpNMky2b+aYMQsa5jlaAQ03Wx0G+Fa0FIY  
d2vqpCHUuo70xoQjaLgi8qhzQg8SH3xURRsItj90m/QSdUFy0wZzVQ3AZcSp  
XH9AB/5pqTfqNQNgMWZS7w9ow5znEz/RHQcdMJa71yUBelOF+BnUtIHXqvN8  
apMwVHfRp3TgtSFHsVwtr1Ud8lejVR5vawOLYczk05qEMtJjt1Q1QFjkr5c

DJMqYFfx/WVnhdeCqkGzpb6h0lUEsyPKiwrQMlo9ue/vGKIPKgGX9MVReQZVSO  
Q6ACbC9WCA406cKg12Jm/WU5mGY/+qt5SxdYM6VUv2bIQpdiWlqpih4EvBGw  
q6iVgcq4QLJbkx60tE+OZAIKQ/bd8bvaW3pgcfv+2krVGYhos8YKq+jDxwco  
PUHtNjgcVmudbdQHGY8Wf8U74qAk+zj4y6Y+0Mvt6d7yEQNBrKBwjbIBND+d  
+pejLQrrpQczAxsN4ILIsAOfkAiMvovStNg0AIdcr8dwShi+TP9ZlIE2BJW8  
+lxWpZNw58xPu/VXhlB39G2pdIwgpGMMmlh/DYEmcMa8zFkAQsPwbxqVjKAj  
G/oS+/jAoLX8VMwrI9Ah/CygoecBmXGOAee/RqCx+/1pK/44nKBNzdZSMoZz  
bzVnVOO4YckkYI36lTHI540yq8hzwmDw2IOpDWOwW4ofEBE5Bp9uWjm2KZ6D  
tr/WefiTR6F4SOV9esM56NNnec34lCk/dowv41zoGCua1t7kR0ChAXETRVN  
gGu1n826mA20/elyWBtMwGDYNzhKggXO5FzRWVv3gVEy/e+ID8zAWU/a6FUw  
BS3pwrLwICZY2OlXlnppCvxelw6iWwzwi1+f7cq6KQRJtPTf+UUPb3SaPjoo  
mlHChtFUx9uDk]9Z]sn30gziOP7s2bylhdgn7KP/1syASJcrhu09ABd6k/PG  
5c1Bm3/Y4twKDaif8N+qqjeHju7vbK0Yavg0Gb5svGQOjuUbohmlVGBamzi3  
JGkBd6MW3Zon9pGrRIG/eqUFyHZWE3c899Bv2rs/JkYsQNwyw5pd7T/UNlud  
/siMgRdlQceVBHaR9lP34YtGGBANNu2jYd9GqUcu9GtcwEC9gZf+Zd4t9C3S  
/xdrMgb+TUqjKPINZAURnQ1vMfDc7M1f3qQNVHQv5kv6CAZ2ptlv4JvW0RDD  
1U9OuxiY+bR1bnJrDXn3ZLVSK1uC2Hrr0ImCVfRQMa/pl40lsNYYqFiSV9Bi  
SdHL6lBLcFNJ3ruIWUERnnfrzJ5Ywiln5kCH5DJq/vzgoWCnJTALWrx7p7eE  
/knW3VubtwS2NYMWMpBR2tqr0pJTVvBR5nLTiMsf1GnXWhygawV2wT4LsXEk  
xNb6vgB5WEHV8Wi5vuoFVJzcmT1TagUNycW89Sfm0fBcT3pTsxUEfKg0Mfac  
Q0JmfclZ/VaQ4MGt1vjiN6o5Nhkre9Qa4v7tZlwOmEXkqN9XaOWsIUa9U27/  
1wySH/0T1mdhDQs08rK/9GZQ64PNgLgsa/DSaKo4qDqNqJj2fDGPrMGbj+Pk  
u9YppBdMc1643RrK38gExhpMoe/Kh12+0thAx5YXx6zfjOIo5XAoFbSBR3yR

a4x0k8iWihsbrGUDNp75uiL3JtDol5Nmx6Jt4HvarxXM8jg6KSVuPiezAYw5  
/fZK6TjyyZPSb2mwgdFijbJas3G07KCi6bFiA/OfbsQbho8hhTeaqqqsWDjK  
pfqOcXEURZ3UVaSXwoLE2ccD1/1HEQ3JTOqxLxZWmsXZC2NGkIGFtURiKhZm  
1Aum45lHUGa9/Snre1hInrMN3a0cRkdivfi2x7Aw6CpgUjY2hOzHfY937mHh  
fiT6ZpAyhEr1go6V89iCnSd+Ke3sEBI5HHVY384WgCxmtP47iHxD4hm5w23B  
19jXsslwED0mXKMj5dtCUVlbrQHNIFIqu7GX22ULfwpuSjEmDaDaylWFLpIt  
dFZVf2Y0GkCC1bYBTIx2UG+/LsbMPoCYnvEPpejaQQ2DTWtKbT9KfJnE8dHd  
Dmwk6CRbYvvR36ZZY6p402hjisUHYvrR+PsnTdfNdhA2K5zQ+68PYT9zLDCS  
7CDb0sTffKAPffsWlBaxagdiVE4ZAw19qOGnVlGwLD0Mft2Jbw7rQ5L9ld/r  
zlGsmu4yZduHKOYP0i342INLpxT+nVofypzpuuxdaQ/CurfuGtD3of15udq7  
b+1BZzv+1tclIgojF02ODtuD45ujHxsGiGhhdec47449HH2xJbDziYjcnI0t  
HbgcYPZd/FbKcyL6tfshvUjBAaI5hNP0lRPROSquxdz8tHUBD88uU6g0iUmBc  
kjbPdoDP/xnFegQT0aPD1heyHjmAX426a4IHEfFzNN758tkB5FI9PAtsiKiA  
k4dAN+0Alu4FooVGRMTIk8CsS+0i5fqpJhGaRBQvMKWby08ItscS5aXkiWhd  
2DDmtbojWO1khT6TIKKL4rUvduwdodj456u/gkQ0eoZ1QTnCEWzCrj35y01E  
1rKXhcjvOsJhuTjvanYi+qLYZ//imS0s3h2lpmYili019dyl745ggPRndmmJ  
qF6rvP0MyRGMU8wDc/cjSFz3wP5FBif4JEzkbDwhoDJDH6XqU06gkvLQ+eJf  
Ajpi2hE4reMEbUeuLFasElA65ux9IXcnGHI+lGu3REB7NjeHXeOciP7+Wba0  
PwQU6rB5pPSWE3D7TfZLLBDQnluTyUCjE4xqnPumNkdALp5vkzgjTvBu8Uj7  
y1kC6r0g3Gy96gQXTNfq82clyMg/bSWX1Rmkagi/uqcJ6HUwSbzrjDOw+BUu  
+1AsF2bhznTOGegzNPpsKa6+Uo8z8nGGaMy0fTHFvHFc3SnJlPkg+3BxSr38  
qzEHP951BjuRoZoDIP3oU8c0qd5S6hX/yBL9TUCxmbrhmsPO8IOxrOY6jd/q  
jeq66G1n4FM+8ViRkt/nJtN0I6cLxLzVrOShnG8YF8yzle8Cje0ZLRpkArIs

/WklZ+kCvEKxkkXLBPS5QjkzOMgFfEQyTp1aI6Dnj/a35h+6gGgY79bAFgGJ  
PvGSEfvsAnJS4dq7uwRU+qLdx3vKBVTnbT8YUe4jtSWHOMrnCif6a0luB4lo  
aTcypkjTFaYiLiKiDhGRvYa7oLmLK5wtdH78moWIJF/L+L0udYXiUg2711xE  
1P2mZ+82jxu47Dd6eJ0mIpV9fKW1uhu00FAX3JlhokpUacjk5AYJb5zwi4qU  
/ngXmhd9yw0cuz8uTAARMU9k5Ncxu0NguxBuxI6IgPqfdzqvO9RY/NjtcGi  
cKFQZe8z7lB7liG214vyHj0ch3lM3cEBX77NdImInk9KimZluUNeutUlmQwi  
sp3uwF885AEpjabI5a+JKJMWsvVPeMDGV8ZDWEr/vRV56Sok6QFmbEiSo4OI  
xM+XHhgw9oCpbPNLff1EtDsTYGaU4QG9bVovadaJqOL34QlRBk/IVR2Tw53u  
QwsLFgzTdf7QuvzSKrK0D+1o95J58RegkLGKJhMGUCbXcEpVix/EM/hSMWwO  
IsU1fHpIbRDM5J+Q/JY/jM4zZyy8Px0C2Vl8HA9oRtGl0a25EInLwN+v+O5K  
4hgKJpxi1qMLB9mkp+Rmv3EU260xg++LgLMrG5/GD02gr+m4ImLPFXjmJGV8  
7PkEOuTzNOBYTTT0WMzifQnURYtE8/uo1jo22N37hmdRCfuYxKSK+KhlrE7  
Oy5oCpk3SNAWqyWC2ZOuoBDyFHq62anwXuUqYEYYdkZDp1FmZ1fk7qkkOJyN  
kvFz04ju6qooo9g1wGoWY708ZxC9MtNzX+FkSC3AFaz+nEHXEpLMBlhS4CDn  
oYc9KrOovJrHlo8lFY7NO6YOVcwiRc8jIaH/pcLqgOa903uzyIqfyuf4bBq4  
fje0s7D+jVibWb7enEqHclrlDua638hgLkZT4EcGaLluXinZ+Y34/h7ij/+R  
CdbXLaq0TeZQDF3OgHRnFqyl3lo7UjSHrKtDqpdfUT6fKoadvP1zqEM8YiKl  
4Trk7Rfnt/PMozcaA1Jnqm7AivV1bXe7eaRsJYsVyc4B2hT4kH9jHj2swq5H  
6uVCvVukzn+f51Hob23DC8258F1PoSdyax4x8yCmlloe0JEiTn+XXEBTOP/J  
sud58PobvqfLdgHFF3J4PhTNh8EMFl2UsIDmk77hbt/PB0aS3B/ZhwsoD//c  
lov3JghbSWy0dSwgxvFHHbGlN2F4pzw/Z2kB6aXxSmedKABh/8NaVGwk1Br5  
5vjJ3AL4W35RYvU0CdHah7RUshaCvun1Zz8MSSjjqvVsbWohWKsLVFW6kVDv  
6Wf/XHYLwfDL4n2qcBlitfF9344qgoDNLzlMmSSk/ahZhH+5CG78533i7W0S

aiqnr5NaLYJTB8g0h0pJSKbIRl5zvQg+ble321DMf42s7bxVBFpMn2fmKd5x  
Pul2iwoHwGwezIFGQi/YMks42XHAVVQ961xBQiJXHFhY5XCgEGer3nePhG4H  
PSjkV8DBkOG5Br77JMRxfo1XWgkHbVUSzN4UU1ldP22mhoMsrw+YZYpHTr83  
ytLBwZrFvij9NQkVjYlfo7fGwQ+99+HSj0joMDH8EBcWB2ZUku9DKU7u/JAn  
aoeDujtD868oDsU7V+g74UCxV+anVg0Jmd/MfX3NCwfpwQYHzWpJqC1jRO/m  
eRycSivRyKVYI1Gys9IHByvi3pifFEsGfhp8748DHbdINoc6Errrxe7ZE0jJ  
f6ej9TbF3I6u8+PBOOhofmIwSnEupvbScggO+LJEnwg+JiF6w63N/cuU9VMq  
a54U/w+akGL9

"]]},

{RGBColor[0.880722, 0.611041, 0.142051], AbsoluteThickness[1.6], Opacity[1.],  
LineBox[CompressedData["

1:e]wV1Xk0VesbB3B1SRliQ50hUmZlyDx8zYRjnkoSJTccZ9oHIYoQyVCclKTI  
kGhQppqKUISWVK5Sxgbq5hsxp+u3fH+/a67PWu/ba+3me7/tu9gt1PrSci4ur  
jVz/fxrM9HyjC3EZx2Z6ntX/6WQ8lDZy6z/2gLHnH6vZPZt2IuapJPMGe9y4  
/1BVuVO4MV5+0nU9zf5lTPR4uXD4KEi503pr7ZHICJW9FVju6YybDIb2+3Ur  
sKepefRtvBsWplvNo9gCmA93avYJ2YtUr9qRrsw1eDKXm71dxQeXawVL+Y+I  
YNbQR0kgwBdPImp3vF0njkozlmtrtx/evBWcmZ6SgIW/pj/juz8+6x6sKmpd  
jxpRuacpgofAvyRoyGJLIjQ1PjRB5DA27TnI1WcvjdC8gulzywMhMdD/Pj9T  
BrFDIsePfA6EgqH6Nd4jW9ByXGssOuMI1Mf7V9x324o2feGOSo8g6F9KDKSa  
yKKK6apQIBoM+1/9Sm/WbcelQCLjxUC9/LE1CRuOdCUJ4v/SFCxf5/6pP6U  
HEJK93tMV1JBr0+8c7VVASNavU5G3aE4Gqlu6l6pCMPNDeP5qjTESQ4QfjeV  
cKbout4CIYasaHVdGlsF++/rXqgapSFPZeDCVj9VnAvKTDwkRUfRQOLPbvsd  
CJalkmC70NGfNzGUI7kTsvt53mlW0TE8/yQ9fKUaWjOjf0t+omOEkmPifEwN

Un+NGPULMTDx26yA54g6/F1n8o0MDDtvt51aEgd3sftPookMrBQMcFd66YB  
1aAy5011DHDtzwkINtEE5eAAS3aCAe5qqoRltSZK0r11dgswwSdk/IRaZRfS  
ZXwk5xSZEhk4ofDPOi287I1Sk/ZjQlyi6d2NM1qIqXHQBjJxMbQnJQEbm18  
G3Jb3HaOCVlp83HdKW3Md00zYxuZkA9bn7c2QAc2w4KVad1MqLycolZ36eD4  
mYGKi1+Z0IrJuZXfqgtlB1GRd0Is6PVQDxw11MNmrqrOLZtZMN5hLuJaqQd3  
Gz/bLDUWRlcmMLyX9eE6f8FG2pEFO+0m2feiBigq5lpj48OCU1rOm7pkA2y0  
afjcGMTCHmNzbSrbEKzjFfWP4llQTVTMU5s3hHwqzzvrDBaWv1zDM0cYIUT3  
0vltl1go8xnojCSMcVo14svvOyzEFj3RNZ4zhtBv/nj+ehYUF1wdj+sB39eI  
5p9uYeG3kX61eR3weHwfc2UvC1/8Ko5sXwLihU/9FBpmoTNhs9RKPRMcWO2s  
VvSZheIO3pPPa03Q1fSi4dwcC5nTR3XKv5tgrEesZeEHC1HiE2NndE1xxZul  
+r2MgKNPI7NzrSlKqlcz+QQI6J2wWqH53RTfTn81FychlFtUVyumawbFB+t4  
esUJCD5TCVKIN8N0ybsk540Evo/ny7ytMcPl93spp6QJfBIW7apbNMPirEtb  
zFYCHbsSE3N1zHEIKsRIV47A1eiQif015hCbSeBfpkrG9JXhKyaL5rimd1hW  
TI0Au9nFbauOBXS3hj1a0CDg+2/LSp5wC7CyyluvaxGwFdB7MFptAbuMXCM1  
XQJaaUWhTxcskNBWvTVVn4CMm8zW69qWuCTSufzIkMBs7orkkGpLmOlPxIWZ  
EBh8FGHosGCJGDdKQZQZgaef/pvaqW2Fp1wvP2+2IHBnpW+hSjgVjnJ8Zoot  
CVxS/sdjtsokMx8e+62xJpDkaMnfPW8Faq5YhbcNAQartqFayxqVg30GZ3YT  
8D6vzMhhW4PP7yGtyJaA5YPL2yKrrOHtk5NcZEdg57DIW+95a3wRbH6YZk9g  
A3fCaSMtG9hcXjDypxDglv9uLMO2geHCtg1bHAhM2gbPLKuywZpVKXtfkH4X  
OIT0cc4GW97M8AQ4Emg667yneddudJSe+WucdEV1s0AxsRtHPcJ0/Z0InO/T  
aUy6txt33e/Ft5E+8aeMdWRuN25X3i6XcSYQvFVa3m6XLbwCUiP+Ju1uldmn  
Qthix4ePhYWkTYJ40oTu2UI6/1Bfj2nltHDTb7O20GwqaJklLV45NtepaYeN  
HkxefhcCXD0+pXdZdmDIC6ijk/669No7+64dMgrx5v/ukrJYEz5rh5H1m6MF

SDeY1jzx0rRHZc/K4iXyfSUBSmH6LHv8krR+NUg6MzlPUfKuPUaqboTUkY6q  
EB78PWMP/hX3x1JJB3TGZwxrUDDwS7zKi7Tj/IL5YyYFbz0tdkqR1t8QtFhQ  
SQHNJam6j/z/pg/ELM0kBc+qZO9wSNuVxX6ZVHTATXqRBoW0j0F2r/5VB1ju  
0HhVRtbzM/eVV+8HHHBJKCPQhXTNqNunJ6sdweSuPjZP9sPkpm//39aOWBwX  
WbaTdMLagF6DAEEmslidLWQ/n4UFdQnFO8I/a92kF2lnsNvvPXTEhpg79QTZ  
/40vUx4s03aC/NoC6SRyXkp2ZdR0uTqhs7Cwg4f0eE723WKGE8LEI37GkvPF  
9rtyw77CCatVL1Fo5PwlzITl5mxzxt64/u5dVgSui32IUhN1weHI7Cc0UwIT  
EZ/DudVdMCZ8W6KTnH+Nwf9YPQ4uaLTcZqt0+kHRQnB0igu6u7QTJ40JvNAW  
2Ne23BXNtzLu+5D5mflSMTzwwRWpquGR63XlvOWd+ZXe4Y7opS8PdqdKQLs6  
rdkx5o5cieoTScpk/ordg/n5PFA4dlKiT4kA/y2pvpNmHvhI66uNUSQw3FhR  
c7TGA9t7CIVW8jxIHulgHrzqifp2aq7jFjKfykJftdl7kJvWctdTgqzn/bTu  
QUkf9N+dTg4iz6uvXx1Wfulh73EFt5bAThaWTDONtUGQF5t5Oq+YhaSJfpP  
Ftw/grvN48aXiljYNVObRC+jQllMO/qsPQuHVp/62qhEx1oPXi3TbSzQBhe/  
0BWykE6L0vBcYiL0zbbV5jwERuvTW//6h4molwYjtT1sPG+qXCVTzkrBie7  
+3U4GFXWO+rjmVh1+Gaw2PWjMAitFq7ez0QKN//GH6VR2H1R86GVDhMbrjnG  
xOcfQ15GoRdEmKDCu+A+rxcl9j3dl76TDNxcaNds1DkO1cWQWdVnDCS3d4T9  
2HYC/0pFcq0qYYDn+PR2Prk4+P45m30tjgFebf7bgVvjkdocihzn0BczAn7  
t4In8WiwQhxg4HLxRndJwQS4LHaxX0sysMtvLZ3xMwF/60coKP2mw1mK6/D6  
0URM5e/XOj9Eh1CdYNvZj0kgJlKKxhrosPwSaSj96hQO8jV4vs+nQ3J+ldSx  
V8kYOazyoj2WjkietLeq7SkQm3rMbjlAh0sxvXiq6jR8fxz8YGRBx3N59vuT  
91Jxct9lo/rtdDQYvFVRLjiDgJQovZjVdGg7q7nJnk5Dm33v2uhJGkoK3GbD  
zNPh+5NTFNBJA+OziVVAXTq+2f8zm1dNw+qNxo5GehnoPSmXuniBho+coA95  
tzMgPzEjnhFLw7EsEb+S7ZkYuReb8yeAhn9PPONcvjYJ4ZOofknNtaciove0u



seks4mXcPX3UaeAbLn0elXsWy87NN3hJ0GCeuEk1ZcM5XLufFeG4FIoHYQ3r  
t6SfQ9xsucaKZ6Hg9qTfvyqUhazDkeusskNx6rjLaFlCFrq9tYkBoSiU+nW  
730/stA+anXQQCcUY82SL75HZGO7m5xl5opQmJTWyUpNZWO3+5hZQy8VNZd5  
b6hMZyOsMKphuoekndmuGoaz2fA9VWcqR1oqbsLEezEbSxt0AtPfULHkvWX/  
BS40HNlScv6dVNxZk5wjLsxB2Zsa5qp2KmTDvQSF1DmwClc08X1IxUVqUZaU  
JgdyXr6TWQ1UiBya2aSqxcHe8S3Fz+up4HJOVbLX48BJY7eG9gMqBpQarVNM  
OYik8DQI11KRPSQfx+vCwX+nKLkP71Ah0E2sknDjwIS/98PcbSri2x9nbPfg  
QlisyqK5MmlHrnW+xl4PMTfsmz9+kgnI2vT7OnwPRWd53jBtUNJ8aMD97iIOg  
i3uDS8kcGsQqtl89zEEiv+zK4etUKIY0vWsm4qDARsjbvpSKK/7Cfq9DOAhe  
v1M0voSKdXt8/h005SD1XuObumIq0h3LaFN08vuknuR/K6KC12px4Q+T30+u  
QciT/h8vyaph

"]]},

{RGBColor[0.560181, 0.691569, 0.194885], AbsoluteThickness[1.6], Opacity[1.],  
LineBox[CompressedData["

1:e]wV0mk41AsDBfB]llaVypKtsoUlyT45akK9kezGLktGyRjmT0mW7DsxiRBF  
SlRKRqWEUK4QogYtdNtMiiIpd94P5znP79v5cDZ5HbP24SORSPG8/L+Npl58  
o68iGZM2HOGsHNlhPjoxfv0Lc9j4mjElTqZwLU61SzOqmBPGgjHFtjFb5fBs  
TN82lfnHuDpqIKzFQQspN9uur6XxwSB+ybrXgTqoCQ7WfSMuCM+a9q4PDgaY  
+d5GiWCuRMiNWzGSfUCaE3v8YvZqeGs/ErmXtAvFbOHK5TQRXBEZ32q1lYLM  
cPa2IXFRWJ4drOw1NEP/kPCU8aQYSh25FT5XzPGvvnddeZsEv06aXtNbug/L  
54TJIUxpLHb21og+tx9SVG/SKwtZVD8f+WHTZQGxYc6bkuyNuEB3NpL9YQll  
stYlldpmyGqZ5izOsILWBEfwrp0cbF+qV19YfRCG5xMOB5rIw/Jy2G906kFY  
/OGo9osrwwVxxNotTGvYX0tIS+RXQrpZY2v102u4u2p9NZxUwrTnu4ym/Tag  
30+4WdqmjLFN4p+oIrbIPamlH8RUQ+T3Vmp2kB2K1IbPyXmpY3uv4vb7D+xQ

PpwwP2CxDSdwumc5fbgFHFHi7i1oByU/fh0gT1e/2zODFuiCcdxyfmDo/YY  
t8w3sY7UBPOXHct/ow04f3eXCdC0UOBNGxcudMB3ewnb0VEt1Lny+YYMOGcm  
msvPttuOky+fVDcL04Lknu97xEQbdC/bRbHhjhB5wFV+Lq6DaVGawld9J4iK  
tbysStdBwlclDyIfj0gey0+J59fFjQNSdU6mE+RlKRP6k7oYvWhvYvfWCTqn  
8q+Xt0mj2knz8yCTCoMXgZ7HyQZYvOPiWfN8Koy3UURsaw2gr9CYf7+BCvNR  
LkOo2BC2GWOD43NUUI0puoFMMm5Fz9hY0Z2hnqBSpPmTjI0Bkn/dM5zB92y1  
wl/QnTh+XNSlvMoZV92Ge0+EGq08wjHp75gz/u40vENpAPa3fK4dsHDBB69q  
mulc00pvqZnv64Le+E0ySwxMoHeJvtMf6YKkLqG4p2wTMKliHQauucDKrc/a  
mr0LtIUWvUJBVxjEmAlq/9qFypL+sn5JV8iXN7DX6+/G3Msngbc1XPFromTj  
UP1ucG/XJoQ7uaL05FGuez0FC0tj+qIqXDFdKJh89I4pZGU6tTz13DDyMjx8  
YMYUV+b9Zi/udUP72JdJDV0zTHzKX/+Q6obzW587TNeZwaA2aiw2wg2m94oV  
TtSZI4Df8h290Q1nX+k1Jd7eh0LbVMFsjsMNwTMltVaQlpZSfewqAda3oZO  
7v1qibiwT4S2tAf2X4368FXlAFynghjzch5wM8obNCw9gA1xBVpRmh4wqfHg  
+JtbocE9+Sj1vwe8e1LuLdl9iL+c2fch0R64sv5thOY6G0ymXszu/ugBnaL0  
P5ld9rhv07ku6bYn4u9mDIxI83alxVlidA/h06cDS8YEDiGW9PZwSbs35kx6  
uVjsX1y/U2vsuM0XyWKcuLK7NMQOeoRcLvPDjil2Iv1qIPhU+CoUFvnDZ0XS  
pyZV0tqcVf/noE9D0MjsB7oyA9uaFyadTgbgWL/CCopAKIZu2hy/VnQEEc+M  
xtkvmBgSVfalVR9FRyIrb6AnDOU1un0+7YFY5ldzZP2V47CTSIUbaT6GFP7l  
kr8rI5DcoVYr6R2EDZesTp0uiYR/h/zer8NBsLytzH/WIArchjY72j46amY6  
tZv0osE1lFWsaqAjubOL+K0QA5Vje6bSZYIhEP1dcalSLGQlThdXxAVDSHF5  
jcNyp/FihBE7PB6M2FMxFkPCcdgTvnPzAUMGiisk7aWF4yGv19BCy2Fgh9da  
evB8PDSaF5py3jBgLUPyk3ifwPuDuX2kSghWNQh35LxLxNOnfkWs0BCYfjhB  
lu1Owku/30QV9SGQ/rlMjrI7GZEONV2U+RCcEMgYUu9MgWDvPmqiYShsKugV

k3WpGOhvU3VihOLpFuabuNtpUIARKb4qFI1GQ2pby9JxY7W8KGckFLrWmnby  
qRkgebdaqMVcycbnMbpqgZCLa95/ANWQmgv81MfNtyMQTxXP+Xb5MrJA0tpp  
kAVLs8m95Cwm3rEC3hbdyEJPU5vEwTomInNFvC4rZoNWOCtTnsjEx5gnrIJL  
2XAP8CzonWMii33DXkwqB6ExJmH3xAksfV35NKIwB43dE1WdOgQoCVLqKRvO  
oOP5znbawL3iEajZln8EC/dRXDnwC/I/1u6apcFOw6FdEeRSap2ub91fhc  
KBdNtd48Q6BX9fpf19+50FAv+JJYTuBzq/Q/v8LzsKbF/sCaeglmlQ3yMpN5  
uJY4dqn9MYH6YqEqte95KBGrHxRsI6CRZ7udPJ2HAT/JCQrPmRfCE5fZPIQo  
XGp4yPOcy2b3cyQW5ISsPta1E7i50jlfda0L/d+o+eefEJAPcxJepcVCd/ci  
P9suAgWB5bky2iwI9dH603kW8ZmSUtdhle8Qn2IHzyTrNFULAxZkFvUcJT8j  
MKzaZJ6yi4U0JeKsfDeBvNEtsUI2LNBqdrpN9BBYORC6TMyOhepv774p9BI4  
3fkoS9GBhecKQofdeA5mu5TscWZBifzqdxfljZ92MPsXBBYs+j6ucEWpOG  
KTk+LJRzvGnveTaKUuks9WPBmqLyQ7qPgMrRlpdNASyQXrFvpvJ84dAar56j  
LNz6mTbezLM41e3j62MsBGdK/p7jOdPqatAknYWsr8pzX4CQmazMwsMFgLE  
iK7DPP8HtObZgg==

"]]]]},

AspectRatio->0.6180339887498948,

Axes->{True, True},

AxesLabel->{None, None},

AxesOrigin->{0, 0},

DisplayFunction->Identity,

Frame->{{False, False}, {False, False}},

FrameLabel->{{None, None}, {None, None}},

FrameTicks->{{Automatic, Automatic}, {Automatic, Automatic}},

```

GridLines->{None, None},

GridLinesStyle->Directive[GrayLevel[0.5, 0.4]],

Method->{},

PlotRange->{{0, 1649.9066}, {0, 391.0876025}},

PlotRangeClipping->True,

PlotRangePadding->{{Scaled[0.02], Scaled[0.02]}, {Scaled[0.02], Scaled[0.05]}},

Ticks->{Automatic, Automatic}) \!\(\(*

GraphicsBox[{{},

{RGBColor[0.368417, 0.506779, 0.709798], PointSize[0.6], AbsoluteThickness[1.6],
EdgeForm[{GrayLevel[0], Opacity[0.3]}]},

{RGBColor[0.368417, 0.506779, 0.709798], PointSize[0.6], AbsoluteThickness[1.6],
EdgeForm[{GrayLevel[0], Opacity[0.3]}]}, PointBox[NCache[{Scaled[{Rational[1, 2],
Rational[1, 2]}]}, {Scaled[{0.5, 0.5}]}]}]}},

AspectRatio->Full,

BaselinePosition->(Scaled[0.1] -> Baseline),

ImagePadding->Automatic,

ImageSize->{10, 10},

PlotRangePadding->None])      blood

\!\(\(*

GraphicsBox[{{},

{RGBColor[0.880722, 0.611041, 0.142051], PointSize[0.6], AbsoluteThickness[1.6],
EdgeForm[{GrayLevel[0], Opacity[0.3]}]},

{RGBColor[0.880722, 0.611041, 0.142051], PointSize[0.6], AbsoluteThickness[1.6],
EdgeForm[{GrayLevel[0], Opacity[0.3]}]}, PointBox[NCache[{Scaled[{Rational[1, 2],
Rational[1, 2]}]}, {Scaled[{0.5, 0.5}]}]}]}},

AspectRatio->Full,

```

BaselinePosition->(Scaled[0.1] -> Baseline),

ImagePadding->Automatic,

ImageSize->{10, 10},

PlotRangePadding->None]\)      liver

\!\(\\*

GraphicsBox[{{},

{RGBColor[0.560181, 0.691569, 0.194885], PointSize[0.6], AbsoluteThickness[1.6],  
EdgeForm[{GrayLevel[0], Opacity[0.3]}]},

{RGBColor[0.560181, 0.691569, 0.194885], PointSize[0.6], AbsoluteThickness[1.6],  
EdgeForm[{GrayLevel[0], Opacity[0.3]}], PointBox[NCache[{Scaled[{Rational[1, 2],  
Rational[1, 2]}]}, {Scaled[{0.5, 0.5}]}]}]}],

AspectRatio->Full,

BaselinePosition->(Scaled[0.1] -> Baseline),

ImagePadding->Automatic,

ImageSize->{10, 10},

PlotRangePadding->None]\)      gi

(\*-----  
-----  
-----next mouse\*)

```
vn=readTac["C:\\Users\\exx\\Downloads\\TbD120M5, Liver 2.997125, GI  
0.912875, ID 3626.csv"];
```

```
Lv=2.997125;
```

```
Gv=0.912875;
```

```
id=3626;
```

```
vn[[1]][[1]]
```

```
{{10,219.279},{30,517.195},{50,159.759},{70,84.396},{90,63.9577},{110,47.8838},{  
130,38.9163},{150,34.6863},{170,29.9145},{190,28.1107},{210,24.8037},{230,23.7  
52},{250,22.3714},{270,20.8306},{290,21.2363},{330,18.7504},{390,16.1726},{450,  
13.9984},{510,12.8161},{570,11.537},{750,9.19971},{1050,9.8519},{1350,9.81318},  
{1649.99,10.0661}}
```

```
model= mouseModel[Lv,Gv,id,27]
```

```
ParametricFunction[\\(\(*
```

```
GraphicsBox[RasterBox[{{179, 179, 179, 179, 179, 179, 179, 179, 179, 179, 179,  
179}, {179, 180, 180, 180, 179, 179, 179, 179, 179, 179, 179}, {179, 179, 180,  
179, 179, 248, 248, 178, 179, 179, 179, 179}, {179, 179, 180, 179, 179, 253, 248,  
179, 179, 179, 179, 179}, {179, 179, 179, 179, 179, 248, 248, 179, 179, 179, 179,  
179}, {179, 179, 248, 248, 248, 248, 248, 248, 248, 179, 179}, {179, 179, 248,  
248, 248, 248, 248, 248, 248, 179, 179}, {179, 179, 179, 179, 179, 248, 248,  
179, 179, 179, 179, 179}, {179, 180, 179, 179, 179, 252, 248, 179, 178, 179, 180,  
179}, {179, 180, 180, 179, 179, 248, 248, 179, 180, 180, 180, 179}, {179, 179, 179,  
179, 179, 179, 179, 179, 179, 179, 179}, {179, 179, 179, 179, 179, 179, 179,  
179, 179, 179, 179, 179}}, {{0, 0}, {12, 12}}, {0, 255},
```

```
ColorFunction->GrayLevel],
```

```
BaselinePosition->Bottom,
```

```
ImageSize->{12, 12},
```

```
PlotRange->{{0, 12}, {0, 12}}] \\(\(*
```

```
GraphicsBox[{{}, {}],
```

```
{GrayLevel[0.55], AbsoluteThickness[1.5], Opacity[1.],  
LineBox[{{9.0909090909090909*^-8, 9.090909090884856*^-8},  
{0.0874367476365131, 0.08197166587636243}, {0.18222810297558026`,  
0.1358255024317191}, {0.27073779576926765`, 0.13315455086535802`},
```

{0.3575112797365835, 0.08143316377978886}, {0.4516394623155443, -0.007347854733426912}, {0.5394859823491253, -0.08816932746972758}, {0.6346872009943513, -0.13787329990112937}, {0.7281522108132057, -0.12816574147938434}, {0.8153355580866803, -0.07001063326902106}, {0.9098736039718, 0.02121659675083076}, {0.9999999090909091, 0.10024804094746914}}},

{GrayLevel[0.55], AbsoluteThickness[1.5], Opacity[1.], LineBox[{{9.09090909090909\*^-8, 9.090909090880112\*^-8}, {0.0874367476365131, 0.08090369567458766}, {0.18222810297558026, 0.12746559200130417}, {0.27073779576926765, 0.1116266937044405}, {0.3575112797365835, 0.046963725126600256}, {0.4516394623155443, -0.04509050859182233}, {0.5394859823491253, -0.11115559892361665}, {0.6346872009943513, -0.12642564594664163}, {0.7281522108132057, -0.07740196037964171}, {0.8153355580866803, 0.004179083230780074}, {0.9098736039718, 0.08937493944143977}, {0.9999999090909091, 0.12834702174618903}}}],

{GrayLevel[0.55], AbsoluteThickness[1.5], Opacity[1.], LineBox[{{9.09090909090909\*^-8, 9.090909090875369\*^-8}, {0.0874367476365131, 0.07984396759533968}, {0.18222810297558026, 0.11939549826670079}, {0.27073779576926765, 0.09184904274707059}, {0.3575112797365835, 0.017913117173780694}, {0.4516394623155443, -0.07109962300031061}, {0.5394859823491253, -0.11717052830989395}, {0.6346872009943513, -0.09879571259704382}, {0.7281522108132057, -0.022693471356141894}, {0.8153355580866803, 0.06128703302641453}, {0.9098736039718, 0.11605625481609519}, {0.9999999090909091, 0.10415981267620744}}}],

{GrayLevel[0.55], AbsoluteThickness[1.5], Opacity[1.], LineBox[{{9.09090909090909\*^-8, 9.090909090870287\*^-8}, {0.0874367476365131, 0.07879243663407876}, {0.18222810297558026, 0.1116081822210312}, {0.27073779576926765, 0.07372482040530459}, {0.3575112797365835, -0.006267252216927747}, {0.4516394623155443, -0.08743897872291118}, {0.5394859823491253, -0.11109134853087661}, {0.6346872009943513, -0.06371549528296311}, {0.7281522108132057, 0.02544576624054603}, {0.8153355580866803, 0.09464282937855747}, {0.9098736039718, 0.10731931496853601}, {0.9999999090909091, 0.0516787429232188}}}],

{GrayLevel[0.55], AbsoluteThickness[1.5], Opacity[1.], LineBox[{{9.09090909090909\*^-8, 9.090909090865543\*^-8}, {0.0874367476365131, 0.07774905743802465}, {0.18222810297558026, 0.10409673959866513}, {0.27073779576926765, 0.05716133039337165}, {0.3575112797365835, -0.026084496726167965}, {0.4516394623155443, -0.09591154799603378}, {0.5394859823491253, -0.09685594593277226},

{0.6346872009943513, -0.02730376120671303}, {0.7281522108132057, 0.061646715198529656`}, {0.8153355580866803, 0.1046634148537508}, {0.9098736039718, 0.07509702498429204}, {0.9999999090909091, -0.006536873471333553}}}],

{GrayLevel[0.55], AbsoluteThickness[1.5], Opacity[1.], LineBox[{{9.09090909090909\*^-8, 9.0909090908608\*^-8}, {0.0874367476365131, 0.07671378556951527}, {0.18222810297558026`, 0.09685439581479163}, {0.27073779576926765`, 0.042069810325321415`}, {0.3575112797365835, -0.042006785469922474`}, {0.4516394623155443, -0.09808544986431629}, {0.5394859823491253, -0.07760167026270944}, {0.6346872009943513, 0.0063643674428021085`}, {0.7281522108132057, 0.08405712128907425}, {0.8153355580866803, 0.09555213349985489}, {0.9098736039718, 0.03202960165577907}, {0.9999999090909091, -0.054402034659985464`}}}],

AspectRatio->1,

Axes->{False, False},

AxesLabel->{None, None},

AxesOrigin->{0, 0},

Background->GrayLevel[0.93],

BaseStyle->{FontFamily -> "Arial"},

DisplayFunction->Identity,

Frame->{{True, True}, {True, True}},

FrameLabel->{{None, None}, {None, None}},

FrameStyle->Directive[Thickness[Tiny], GrayLevel[0.7]],

FrameTicks->{{None, None}, {None, None}},

GridLines->{None, None},

GridLinesStyle->Directive[GrayLevel[0.5, 0.4]],

ImageSize->{Automatic, 28.4375},

LabelStyle->{FontFamily -> "Arial"},



Method->{"ScalingFunctions" -> None},  
 PlotRange->{All, All},  
 PlotRangeClipping->True,  
 PlotRangePadding->{Automatic, Automatic},  
 Ticks->{Automatic, Automatic}] \) Expression: {Bl,Li,G}  
 Parameters: {k1,k2,k3,k4,k5,k6}

]

Manipulate[Show[ListPlot[vn[[1]],PlotRange->Full,PlotLegends->{"blood","liver","gi"}],Plot[Through[model[k1,k2,k3,k4,k5,k6][t]],{t,0,1500},PlotRange->Full,PlotLegends->{"Blood","Liver","Gi"}]],{k1,0.001`0.2`},{k2,0.0001`0.1`},{k3,1.`\*^-6,0.01`},{k4,0.001`0.2`},{k5,0.0001`0.01`},{k6,0.0001,0.01}]

Manipulate[Show[ListPlot[vn[[1]], PlotRange -> Full,  
 PlotLegends -> {"blood", "liver", "gi"}],  
 Plot[Through[model[k1, k2, k3, k4, k5, k6][t]], {t, 0, 1500},  
 PlotRange -> Full, PlotLegends -> {"Blood", "Liver", "Gi"}]],  
 {{k1, 0.007}, 0.001, 0.2}, {k2, 0.0001, 0.1},  
 {{k3, 0.00108}, 1.\*^-6, 0.01}, {k4, 0.001, 0.2},  
 {{k5, 0.01}, 0.0001, 0.01}, {k6, 0.0001, 0.01}]

Part::partd: Part specification vn[[1]] is longer than depth of object. >>

ListPlot::lpln: vn[[1]] is not a list of numbers or pairs of numbers. >>

ListPlot::lpln: vn[[1]] is not a list of numbers or pairs of numbers. >>

ListPlot::lpn: vn[[1]] is not a list of numbers or pairs of numbers. >>

General::stop: Further output of ListPlot::lpn will be suppressed during this calculation. >>

Show::gcomb: Could not combine the graphics objects in

Show[ListPlot[vn[[1]],PlotRange->Full,PlotLegends->{blood,liver,gi}],\!\(\^\*

GraphicsBox[{},

AspectRatio->0.6180339887498948,

Axes->{True, True},

AxesLabel->{None, None},

AxesOrigin->{0, 0},

DisplayFunction->Identity,

Frame->{{False, False}, {False, False}},

FrameLabel->{{None, None}, {None, None}},

FrameTicks->{{Automatic, Automatic}, {Automatic, Automatic}},

GridLines->{None, None},

GridLinesStyle->Directive[GrayLevel[0.5, 0.4]],

Method->{"DefaultBoundaryStyle" -> Automatic, "ScalingFunctions" -> None},

PlotRange->{{0, 1500}, {0., 0.}},

PlotRangeClipping->True,

PlotRangePadding->{{Scaled[0.02], Scaled[0.02]}, {Scaled[0.05], Scaled[0.05]}},

Ticks->{Automatic, Automatic}\)]. >>

Clear[newmodel]

newmodel[k1\_k2\_k3\_k4\_k5\_k6\_][i\_t\_]:=Through[model[k1,k2,k3,k4,k5,k6][t],List  
][[i]]/;And@@NumericQ/@{k1,k2,k3,k4,k5,k6,i,t};

```
fit2=NonlinearModelFit[vn[[2]],{newmodel[k1,k2,k3,k4,k5,k6][i,t],{k1>=0},{k2>0},{k3>=0},{k4>=0},{k5>=0},{k6>=0}},{k1,0.007`},{k2,0.0001`},{k3,0.0018`},{k4,0.001`},{k5,0.001`},{k6,0.0001`},{i,t}]
```

NonlinearModelFit::eit: The algorithm does not converge to the tolerance of  $4.806217383937354 \times 10^{-6}$  in 500 iterations. The best estimated solution, with feasibility residual, KKT residual, or complementary residual of  $\{1.34191 \times 10^{-12}, 0.0000844877, 3.57821 \times 10^{-13}\}$ , is returned. >>

```
FittedModel[newmodel[0.0259731,5.86338*10^-13,<<22>>,<<23>>,0.0347198,5.86338*10^-13][i,t]]
```

```
{fit2["AdjustedRSquared"],fit2["AIC"]}
```

FittedModel::constr: The property values {AIC} assume an unconstrained model. The results for these properties may not be valid, particularly if the fitted parameters are near a constraint boundary. >>

```
{0.940503,877.71}
```

```
fit2["ParameterTable"]
```

FittedModel::constr: The property values {ParameterTable} assume an unconstrained model. The results for these properties may not be valid, particularly if the fitted parameters are near a constraint boundary. >>

|    | Estimate                  | Standard Error | t-Statistic               | P-Value                  |
|----|---------------------------|----------------|---------------------------|--------------------------|
| k1 | 0.0259731                 | 0.00410015     | 6.33466                   | $2.42286 \times 10^{-8}$ |
| k2 | $5.86338 \times 10^{-13}$ | 0.00048627     | $1.20579 \times 10^{-9}$  | 1                        |
| k3 | 0.00103364                | 0.000157525    | 6.56172                   | $9.67187 \times 10^{-9}$ |
| k4 | $5.86338 \times 10^{-13}$ | 0.000724777    | $8.08991 \times 10^{-10}$ | 1                        |
| k5 | 0.0347198                 | 0.00570876     | 6.08185                   | $6.68345 \times 10^{-8}$ |
| k6 | $5.86338 \times 10^{-13}$ | 0.0001985      | $2.95385 \times 10^{-9}$  | 1                        |

```
Show[ListPlot[vn[[1]],PlotRange->Full,PlotLegends->{"blood","liver","gi"}],Plot[{fit2[1,t],fit2[2,t],fit2[3,t]},{t,0,1501},PlotRange->Full]
```

]

\!\(\\*

GraphicsBox[{{}, {},

{RGBColor[0.368417, 0.506779, 0.709798], PointSize[0.016666666666666666`], AbsoluteThickness[1.6], PointBox[CompressedData["

1:e]xTTMoPSmViYGCQAGIQDQEqDt1]zMYfMrIdIHw7h5CrorX9mg1QvqeDkeaX

DW4/kiH8hkCHkjXVP8MlQ6H8MIc7Uq2Ppv3yh/KjHep+1/QofHSH8B0SHGQ2

JaR5lDpD+AeSHDLzV1xPdwRKp/qkHezRUP2lS1UPt2hxi0lIETGBiqf5WDS

/v/8nrMWUPkcBzmTv1wNB8yh8vkOngWxAqLxZhD+gwKHCVW3+xZeMYHwFYoc

ormOHKq2MYXwF5Q4BDNMuSFxwAjCT6hweKTAsEdPwxCqvsABydGqYP3/2lDz

6h1E/siq31ioCeFfaHRYbyf3652QOoRf005wOXQ7s0OaEoSfMcFh2msfVZ0t

yhC+xFSHPzUqeyMXKDvUZ+0p+Xx8psMSFdv864oqDgAyqG+y

"]}],

{RGBColor[0.880722, 0.611041, 0.142051], PointSize[0.016666666666666666`], AbsoluteThickness[1.6], PointBox[CompressedData["

1:e]xTTMoPSmViYGCQAGIQDQEqDlf1Of+FFNo7QPh2DqKu//y3LEqG8j0dnq2N

D23qKYbwGwIdeH/bbjzHWwHlhzn87+YRv2dTBeVHOyyPEzq0r7oawndlCdJX

LRzv+xbKP5DksP7oDp0LUTVQ+VQHG5kdcXxboPwD6Q5nfkokZbfA5LMcLDTY

3s4ygcnnOLDP0ipetxRmfr5D+g7G+f8VofwHBQ4bphxwNEuBukehyCF4zj/3

g18qIfwFJQ6y80TmGKyEuj+hwuGaxi3u3WfLoOprHGJkps7u4CqFmlfvUNQ3

9fMBN6j/LzQ6HNa6d6LmQCGEX9Du8LX19ZqN93Mh/IwJDo3rlDy6sjMhfImp

DkXXt1vw86c51GftKfl8fKbDpM9bNn2+muIAAGReeW0=

"]}],

{RGBColor[0.560181, 0.691569, 0.194885], PointSize[0.016666666666666666`], AbsoluteThickness[1.6], PointBox[CompressedData["

1:e]xTTMoPSmViYGCQAGIQDQEqDom5a1ffrDd2gPDtHGTOLdworZ4A5Xs6z0l8  
6bTmTiSE3xDo4KoYGuatGQrlhzksdUqduGAKjB/twKMskRRwD6reIcFhx5PY  
WccvxkH4B5IcPua8mv7YNREqn+qQPtGcS+pbMIQ+3SHqFksx//J0qHyWg+yK  
HylazdlQ+RyHie0letXiBVD5fle+oHVTt14ugvAfFDiIc9WGCkuVQvgKRQ76  
f72DLL+VQ/gLShyK/4r9cN1UDeEnVDjkeGU0+lg0QNXXOLj52E+vD26Cmlfv  
wD/J/6bX2xYI/0Kjw5w]hpfUvNsh/IJ2h9/FFydsTO2H8DMmODDmro583j4Z  
wpeY6jBz54GnG+dNdajP2lPy+fhMBx0NnlMhW6Y5AAB35nRW

"]}], {}, {}, {{}, {}.

{RGBColor[0.368417, 0.506779, 0.709798], AbsoluteThickness[1.6], Opacity[1.], LineBox[CompressedData["

1:e]wUV3c8le8bpuydklgoCSHbsZ73tskWsrOz957nHM450qDISlbIKArJiKaM  
+iqyQtliklVGSn7n99f7uT/P89z3dV/X87nf5xL1CLH23kNDQ3OXkYbm/1/N  
n20rYZw0WOQQf7Zm/zX4kPn17mL0e4z7oG7CeblrkNlrFHE7+gd201buPPf1  
HHj9Rc3mYvQOdtZWytMjMRs213r0EqPZYXrzUORc4BW45ND2telqF9RmKzTv  
rGZBSRtHDas/N5AIRdPR8VnwLK7t5Dt+Pvg9ev2+j1QmsG5zaEVCwGnsXHI  
4+kLcMjRi2bS7DAUOpRJSglcgAPvpz6WXhWBrARSzj/HDJDUUqhk9D8CvU+H  
LC0W08FsZ+rECL84CMzwG1Uak8HuDuVSot1xOJFtUBRymwRnXRSWNVaOg3K6  
S8zl/SQI66Q0lvdIgjFWY2a9lArXkhTUQqNIIHB1r9DLIQIUy7wvPOohCzJe  
SwHctgSoek/502p2EnAif9rfTOBhqnpjQ/FVObhRlpBdNpMCS/90b9L7KwDj  
K2bJfklirNkdtPnwQQHwd+P9y1sTYLN+ia7NVhHqnPa5HFyPB5qzBT6B2kpQ  
6Xxvkzk5DrgfLum+5VeBR8ZXY9ZfRgPfgectTy+rAFSLR0mciAbBkIILZDpV  
SLqTkdV/OQrEDuv9UFtRhU8v0rYnPSJBjaXgbmmPGjhXFlnt0QgH9bFg93gt

daC5+OuVf3sYYCf1uG2a1KGayTPJRSsMjD4sRTCWaiD0u+ubBLNQcMT0VIOj  
tWCJVKpgKREeshSpYvkNLeCm+Vh2xzgQ9rzmol+PQvBx6W5YcVgA1Lm+H0qi  
wuBqX3/EzWE/wFc9U8PWMcgoLMuz4/QDqU0bS4I6wNUGhtc/LHzhH9J4oNcO  
QPoamsHzyQe+edT7i28DvHE952ai6ANDZFFhJnVtYAm352s77w23BhhJL9u0  
ITuWQa9Y3wssXYetrtd0wDzSai543R3UiYYMSr914JKJrrZeoDuIVbW38arp  
wsNph225OTf4/aNU5F2rLtya5dWoGjwLX/bxDLdv6UIV3bXIG9OuMKBMoRTh  
9GCQuRBG11ygPClo6WyrHpT87EiRlHOGi2UzZdpbepCcx7YyYe8E0d2nbY/i  
9GE+R0xlm+IIJuzqD2cf6EOVZVPfwy17+FXEkBH0wABEHyS56R22g+nHcVoW  
mwYw+64wyDTaFnq/LK7IqRpCqs9Is8uQDdyQfnvmV4shGH8g32MqOA3plgas  
oxuG4PQkGXPYexrCI9u6HqgYgUzdrzCRcGswEFhyLKHFCBQfDntfcLYCuRnu  
d84bRpBl93ZrecwSBOjIF5GKMYju/Ng0PmMJyyaBP2lbfOfqz/E7z5+aQ/4k  
7kn6/VNQ/X6cXR5MgLhbF+m/fgpo6EnKrKGnIPDoYQITZRNI4qa5L1hlDNoB  
9Jmc902A0nlb/JiYEUhnxuqs/jKB2WCz1ccBhsDX9H19SMkUVt7NzE22GsDC  
9qBzbrMpLDcvnV3y0IdhYX2u2F+m8PJ047Vrj/SgS6f1mYOSGbC9+ekjKKoH  
VzOKpYSazUAmWHdUbK0HNAQctm42mUMYh86/zl6A55+iVoyXzWFHcIb9uyWA  
aR3+27KUBThe11+aacXAVTN3XKPCamboz/XpbWuBdoPblJ+RJVy6n3LLtVsd  
yPt9xjV9LKH9gsF+bQZ16I8JGOZMs4RoHna1aFM1sIboV/cfWYJK4WFJw2+q  
4DV44SGtqhVYPK6hLXJQhmrlK63DNlaAJabFyD1Rgh8Fuc23wq1g4/vWDr2M  
EkR7IN02q7eC33QP3mxxKQLlZ0tRwTFRSP7K1vSeQR5enXmYH6hrDavPjFZZ  
XpIDrodPcjB3a3hEZ3ny2AE5yE97dfFrkTXwqfaGq/jJQi3vp0R5ntNwpsVe  
P0LiBCzFzcXSKZyGW1Jell8pEBxejFyzOI0mMqEmfLXSSLDqs3ApAunwXvv  
Yf1ukID/VNld+vbYAOksm2559THgLuJ2KBKxgWG1z957OY6BHQ2/bQiyAe3U  
n6JNMWIw3XvEjDfeBiK+n/yQfuYorDjgtNxXbeBMrsj3j/qioNSlpabEaQsv

bjzrvdIvAnFHdJUZZWxB7Ni71kZrEdjz3Uzmjq8t8PVniPS8E4b9iZ5Cvz/Y  
gni0Mt/vi4JgP+N78NWOLSjSsQqc6hWAlr1g3hJBO+gRMn/OyywAYuxx7Ppn  
7GCskTWdUsgPKsWXD7IG7KB4zu19/xYv1JWvKQ18tw07OPHfm668IHLLLPcV  
+QwQx9/0OPbxAOtd4UmS7hmIf05ably7H2ae1LfGt56Bsm5B++6CfWD7gnvl  
wcgZGCZJi14S3gf9/dHH19fOgPyxttzGKi64/xblhsjYQ/gnPpo4AidkfB2I  
8Cq3B1bm2YkOBTbYnVeok3tkD7hjUrIWQawQuZT7aXrKHvgqtvPM77DA2U1X  
K4cDDrDd2F3yRZMZljiXZc0vOkDG8aX/CnMZoIb9tM+FGgeY+LG4EbNFD8Lc  
D270vnCg3rOwqSpXemAWTGHTpXUEbH/dX5IqHUxLcy6oRjtCQYdHjCz/Hjgt  
HyEale0IvjHdUfgCWuhVHrNvvOsI6zS7vKeEaaEJlfrif3cE+pQPgp/kaajz  
42SlqJsTRAlZNOju/MV2bLKnXJOcINV+WNZK4S8W7rC5v6jQCYTrTUbnA/9g  
Lh6PiHwjTtDj9r5cf003phBp4cZ6yhklKeWjo7hN7FZsU57ROWdQjUItOrkb  
2KGkA69Jac4g1fKtWXRrHWMkf9CieeQMb577L3T0/sKm8kIE1xVdoEvqha5Y  
4RpmVfTWWsHKBTqWlx/OH1jDXpSqZoQEuwb3cCclKljF7tXsbs1Xu8A4nv+e  
fNUKRu7IHJ0WcoWamctlcF/9wJb/xCTkarnCfz0ieee+L2L2mm4i5i6uIEj7  
+zYz1yIm1Snn31nkCudKq9KKAxew7B1+zqiHrtDtIMMpUzGP/dWibZaecqXO  
C961uo/fsNddgzvXbc/CV6v3AS+D5jDcblv5aY2zwFmdYc/zcBYrx8oNWZ3O  
Am3p+84Szlks8nH4lfjCsyB9a4rta/cXjO3j+au32dzgxYfHv/cFfMKA9p9X  
+iE3uEfbpen84SMWJRqu6iXtBoqMA7Qvz3zEpt0dpwRN3UB5yvrMNZsZbD9x  
oH7TyQ3yrJjd/e99wIzKdQhvA9yg/Jn+0J4n09i9T1LiFy64AWdLjKPr+hQ2  
u6dky+e6G3RNjzY1HZzCBI7uf6lT5waW3WnmF/QmsTTPPyHb/W4wIFQwRnPn  
HWb35WWbH4s7uN+9yTr7bBTLoIOL+gLukLpjyIA7MIo9Emt2FZVyh0Y2DZ9b  
ISOYhHfR3nfG7vCD33JQ5+Qw5kLiGm12cIeHVms8x3PfYlcr06qz/Nxhpsv2  
+RrtW+zP10Azo/Pu8Dr83mqj10FMjuHjYbECdxDyzfj/6jKleYnbru1Wu404

z4srjBNvsAEfrbwHve5Qe/HtS9uHr7HSOfaP4kwekOT61NXt6CtsmJHYtIff  
A/ijvqumL3EmCU2SNPHPSB+XadyMLkfc/edlso19IDELydPvVnrxW6lW++E  
nfGAT2dn+64q92JT1S9em53zgPdmkUdWknow/fn6SHqKB2RW1kW+EX6BxTMf  
NfyY6wFVvZLm9DHdWL1k3sHOKg8l6ft8Rmn40cbvn9IV+cIDDioRbGeLnmEL  
CxZMX+g9Ycggceeh5xPM4Nf897s8ntAfTXqd+u0xVr6T+jrpqCdUqvBHNoY+  
xpy4WnMPaHuCijROc5j3EfZKWeSYSaInlMXe1Kjo7cAksHYm/gue0P7pj/rj  
vR1YmpHN4pcCT/h69+hLC712TMspvSn5gSdIYRLWiiOtWD1+RbtzxR00r/2K  
35VvwVgyMo6l0HrBmiTufZBzH/PJFmM25fKcWdfqdv1/mrHDVfZvvsp4wQs7  
6xHSaBOW9fKx60E/LyDPu8iKdNzDFocddWZjvCDnaujigtY9zGj617Emshes  
9TKD1b07G02qxA/TCi84WbetxdbYgIXzXUnAf/CCe3dfV+jZ3MYGDp84a7bk  
BcW2ux2pF+owKcluHYEdL3i0131v2VuLfdb4zdws4A3B3C/4/lnVYDbu7vlz  
tt5w3ogkf76sCrvr/yeh2csb3glL10jQVmFskdf0EiK8IUXUWEHduxLrJvej  
C17xht3b84vK6hWYym35++avvGFPxGARjqccu3r/Zb7gpDcc2ZD3Fswpw5a6  
vB0/zXvD6CUHhwsHyrBbgwW6REYf+LI4YHFbohTj36Qduq/jA/86qq4XfirC  
ImmK7hOtfICWdX/zd94i7A2zSoGFmw+gAfpP38yvY+cP+bvNJ/lAyLbHBWYw  
ANvWHlo61OYD93+Ht+rsz8Ms/WSZj/f5gGMNx1F9j1ysKivjqPw7H/j5zIz+  
Wss17PQHXXv93z6wp6GyNjI4B6tlKAm3YD4H+XWB902D2RiN7j+LDgfpwavp  
PPkmtWzsdmLTkyC1c3Axqtlb/sBVbE8F51SM8TnoHVssC754BbN/GbBBcDgH  
xQtCTwbpr2D0AmIncuPOwbalneZVuzM9UFOTlcbdf9rzboMl4tY8/RKfW/f  
OZiJMjv3M/UCxsJg1jf07hwEMqyYf7ybgT2wof83+/sc7OawCV8U0o9xJLrz  
rzL7gqD/geffnNMxr5udCn80+sLnsRFulnIKxrUWdY5T3Rfup6gtfdUkYz4H  
hwgHT/kCd/8LM8urJOwhyBYddfSFpUJpgXeLaZh5uwb1XhfSEqfdaq+m4o9  
lT6j7tbuC3x1P+OEQwgYv02TjX+/L1zv4cvzmsdjwQmclZETvtDeGZh/5xwe



E+zvuZm+7QuyplENmR+SsfDVo11XWfyAbb8trmMtCevlx48XCVB9xTVjRMOe  
hEWew7HfU/eD6PbrEXvtErD+yznHO075QeNbjr9n0uIxkZYV7W5HP1Ccc+IY  
a43D/qOriX4X7wdntDPD1JViMfHygz00HX6whaM4nQ6OwhL7orZZX/qBZsP7  
1uW+SGxoZZCHb9IPDIKe88RIRWIpWIax1B8/ePt6gaftdzg26jPrqcTqD964  
77PSvuGY9GWdZCToD9lGLBz/JsKw8antRmsNf/CR1TSQ/i8Uk6U785+ziT/k  
SH4cNTYNxdJONM35OPnD5vh07fniEEw+PuBQQoI/yKimGnc9DsIyDkyRbnZQ  
1//ycnDZ+20/L891erz0B/L9xtYbV/wwX4af66KT/vCNc/Qa3aAvpr/07FO6  
7Q8dpdEqTW7nsOZA3uKzLAHgfF5MPOuuD3bki8iosAA1fl7JcZPeB6N5q2pw  
Qy0AqlcUGh52eWHBp3STnY0D4PS83HjcES/s/RPzFkGHAlIRWJ96k+GJtd/1  
Fi+MDYDyGgaHdl8PLOpyNkPegwAg8k7ZsNm5YV/oS5BdTwdIrTc+3b1/FrNO  
qo3mHQuAQJZfLKI9rphc4JPZ7I0AyHrt+B73zxkr/vxK+DRDIIXJVngPHHXG  
2J3G7bj5AiGcffHFsIUTtmC8/CJLORBahAzdi9odMIcn2/8s9APhkchTqNuy  
x3pxDKqctoHgfHXCOfvTHqs8LnTrUiQ1/uwZ0DNsh7nRm1AymglhT/Q8S4m0  
DTaQaPfl+FkgvDszbspQexrT+uW+yfQ2EC49jnCc5z2NCXyOPUdZC4TTul4p  
udtW2HnHtBKDPUGgmxQeIBZhhW0NZo7RcwbLguH/N1lS2zkcZVhmnwQxLRw  
Qv43C0wP15iiqx0E01uzfrpb5lhjQ+eDPVZB0ObAsb7LYY5lFQ8fj4QGAQNf  
UvtLS1PsVOIepuSGIFhYFEggihhjT/ZQesR1WebJzhpexphEgEHY/80BMEe  
kYaDV+sMMXpHuW/xS0EwJqq5oWxqgEUOaoio/wuCx3XL9eoV+tgnI0P73+zB  
cPSx0kV5Wn3ssaprb4xMMcynz/Gd69PFZBv8aFS1guE/rcwoVyVd7IZ4FG7D  
NBjGkzSd2m7qYPG8F6sjA4Nh1jXHhi1TG1P+2ZYeVhcMedxDPU2SGPbq9PdB  
0XZqvpILMufNEebRfEhwqDcYiI2Dhj5xWtjlqJQ7CrPB1HlzSSh1RgP7tqk3  
9FMkBGJMfmrNLuOwZPtowYqTITD0358gluAwnrZbXjYoBKKydj+uXVPFtONZ  
NpudQmDspJzgc3MvrPDva8Ho3BDARh8I/1SxORcaL3FK0PgmwLXkqSvIvai

U6F+tCkE0iXKCuo+KGA/k6+B6mAlnIsXW333Th6rwt9R+EsfCqFyY9zyyyex  
VTmDMzbsOfAnUikFOE9imh+nE27zhMjbt4gT/Uqy2Fttrm7no6EQlh/X9OiK  
NEazN+JMj1DPW+TZZ1yWxEyaWBN5jULhmb00cveEBjbrWVEaZBEK2rT3Hq2e  
kMCkn4/MC7mGgmSvMW3hLDjmQMllJieEgqW0mnZyhBhWoTxYOkoMhairbT1l  
n49iK1/9umUzQqGWrd7pwZmjGNngOseH/FA4Qr80a21yBGtk/FeKtYQCS3zl  
8VQXEWznQW53Xmco2H7XDxo/fBgZ8j25sPw8FBrP+2XTrgtjH3rdFEvfhSID  
8xaTJEMhjC3jWTFnaig0OUZk7pMXwM6oOy/Yb4XCjuZ41ufYg1j5wi+Oe7uh  
0LBD5u/t5sdwJuL27hxhYLkqpS4XfADzZju/8OREGAh2Tt2tWefB6l8Sa1sV  
w4CTceD0ri0PtpGR6N+gEQbNZX/hYMd+jMwculBkEgaxC1x1TNnc2ECvX232  
6TDwk4zGX6PnxvjSPf0znMKgaOKAIW3iPqyK4cxCTEAYhIYduvEligtb6ras  
DY4IA/rm8PitFU5MhXTK3zshDDzcm46V7nBgPXvRgvWFMHDreCZEKgbHvtEc  
W5CpC40/Z+JUKyaYmbnHwrViTWfG3XZ9vJGXGYtN4fcX7AiDheey6vl2TBjT  
P9YFppdhwHfvRj3hPANm2UlfuzsUBt0/Cq2eqDNg+Ym7fhsTYZCjXW8ZdoUe  
k/yzNv95IQwezL4kvzWjw8LbF2sm1sLgWM6kjXLTXqw9btZvcDsMtrkKa6SF  
9mKntt7Nd7GEg2+fnZrpP1rMf/3xflFUOFQb7HQf/LKLGpvba7IUwsGG1psV  
rf5D2xHNfhT1cAhe9caX0P9DF9ZuzUeeCofGwSMvpXT/ouF7ZTUB1uFgyLKP  
4VPAH3Qo7Lqfh2M49DuK+f8t3Ea3ly/PW/iHQ/QFz+k61t/oV316jUF40Igj  
TKbNm24hzWCin1Z8OHAF+hMnszfRq8WoeamMcLjdcq5BRmED/Zh3nqevDYfc  
5PPvntX9RCo1djV/74VDXWHC9ALvT5Tsa+n3sy0cRqQKnqalrSGOod35mb5w  
mJZSrs4NXkV2VVo1Y4PhkD1V7jc4v4KKvVX9Bt6FwxZJIPObwXJfpGa75gP  
h3Uy25vGr0so+qZYTEmq9bzC2/6E7R+oy0PYr+Z3OKSM+KcC3w9k8XHffC5z  
BCzXHW79z/07Cp3e+hYmGQH9C80R/3S/IdOrJpMpChGwbjA0ZpE3hyQMOMt  
cRGQ5uMgG7U8i2bunGA9aRgB8sbY3oY7X5FlkqvMolcExBskmzK7fkbS8t+j

nAljwHJuuk9x+BNi+hrT1R8RAWumZksK5p/QY9MrFjXECDDliY0zMfuI5A49  
D/MpjYDAKjb/MwvTiO2NZfvIrQjIbq5jT+WYRt9S3+/Rb4gAwb2/Fftw71Hp  
943so10R0FitZDjDPI m4OiRbZiYjQKx3/fHy7XG0GNzyz+JzBAQ98Of22RID  
vUd0DR8tRADH2Fn159ZjCj/hPH7jdwQY35e5cpt1FK04ZG47HogEEwv2NefG  
t+gV+yHdfuFI2NBfXNUXf4uqn1RfUBOPh0qbuSNcxUPITfLpIX7lSPDq7no9  
nz+I3mz9QiPWkaD+iaVzMew1un2bQNFzjAS2zFC5uKsDKN2N402TeyR8iZQ5  
hLX9h6D3uPvV0EiwMhGXauR/he7mOaZaXI4EuaSt42ECfeiiydzLrmuR0DVU  
F7rHtxf57kbwyN6IBBGpijWs9h4kcu5SjdvTSHBcXy0TDn6BslQe9/T1RUJh  
cdExU9bnKHDBIEttMBIab06l8CU9Q0bF7+yrxyMhfzxf6s3aU0TD8HOePBcj  
A9/UkjPmn6CQkWNsevRRUE2zj2eW5jGyl8/4flktCkIX23h8jxxCcGmpfWx/  
FLgeUTPkMu5CXPoP/AKOREHkcWsyY/VDdLfZqOcqFgVjVQ23SqrUD7XneIp  
gygY39T59269FeED90WLM0fBLD2ljsmoFVmJTYi100eBMTeZ+/52C1rLDiB+  
jlsCBdH/TMdzmtHE8muHE4Qo0DRg9syjb0ZPTZTko9KjgLg8Va4V34Sy9+58  
YMqLAlV7PcKX4EakFHFZS645CtT1Z2eFUu+iQ6/XeOI7oqDH/F5MPtddRHfi  
zOKzp9T8H9gXKToNaOTT4etnBq0AiTZPvTLvDoq2vreVvETtp++c2BypFrnW  
877pXY+CnOXqgvMDNciAjf4W904UPOqP8xE/VIMOPNWxq2KNhtqqzHPD3bdQ  
q/xw038S0WB4dPn2LYtKVHoJd+GAHHX98L60pw8rUPp8kYe7ajTgpk0jP8IU  
IPsy733r+tHgVT1K80DwJvrNtRl8yDMAqsJyL0sfKUOfAp0MfPyjYbzL24jz  
dinq730kdDcsGi7faU4XVCtFhfj0V7r4aHj0XdZ2uLUYqa8clAq4EQ1dj+7f  
+nrh0jpimkx7vyIa2P47ouc3UIhYqj+N/6uLBn/VW2LiflVo8mwd5Wp7NFjI  
Ef/ras5Hia81v7aNRYOpv/cxL6lc5K6+x778QzQ8/bfqy0a+hgwqe/oz5qLB  
cc9YY/5sDtqXYH3XaTMaXl3n4H93PxttfD1wVG83GlRtsrINxLLRIOX7a9KM  
MXDr8fDgobyrqErcN2GHLwbmtlednc5fQReuyCx9FY4B0e+7jGSmKyj075rb

gHgM+A3Lqly8kIXUh5IMSIRiAFd/q9IMLR09Tsrep20XA4m7K4tLAxdQ8zf7  
NEnXGJi+v7lMS3cBFZ4W3tznEwMbqpIbllgG8pKsmfoUFQM+Lm0Coz3paGu4  
61batRjqfNgSmhEgo/dYmkDQjRiYrZnQUU0koe1xpdsK2NAV0iWVe5TGrqE  
Hw4Xvx8D9ZovjdU6UtER6QWt3uEYsNs2GmcvliDGvIa7d6dioJDUSPjIIQJa  
pI06WvAlBtyrG1QqSvHowdguk/+vGGDg1i2v9kxBRTrdCdZ/qfjVNDn9U5IR  
8U7GkjpgdLPSi3ZSdsiRkms07zMoTC5E1q6T/thOQ/NKEwS/BWHgUVn3rplwC  
4nMobZs6GgsM06qzyYHx6KPsiZi7irGQ6rs8FLMei6InwN/idCzQ3ZUQeGcQ  
jZz0Gd6rOsVCzh62Ia1bUQjuvrQQ8YwFddLXcXa2KMRKtlNeDafWnzm/eORT  
BFpZEax+Fx8LjlxCHCynI9Co00eBp8RYOHjV3vpEbzgqIQ+kyb4aC1/znQxU  
HoUhUpF8REJhLODX0sq+QBjyZ9z86lkeCzudzQ3kF6FI6T3hpVJjLDy8NRrj  
2h6C+tLzckcHY2FI9dBslV8g0vm2fEX1XSyM68iY3G4MQA8NjS7lz8RC+JR2  
1m+aAFTP8DvVcTkW9BiMl2pv+6HjPIYpHRuxcE3jWfk9sx8q7a6JP/QvFn4b  
j59TC/BFV9Mcw6bZ4mApNGlVXuMcYv3SGIjxxMFF3tOH0mt8UJouq2+pIHVd  
iX6j/pAPit7z0NVDKg6YPj3r0+L0Ro54IdNZwzhonmNPMj7qid5+iDI0tliD  
MhupGpN7HsgUG9CptouDs7g7deU6Hgj9S1bz944Da486wxfB7uhl4oz4EjEO  
ErzGX54aOouuT+KOWGTEQUmmKjl86Czi0bgidPdKHBSVkoLj/V0Rw7Y2T3gp  
Fc/eh2q9+13QQsxN2o300IgUelTjXOyIPmf+/LXrjoPtOg2uDVZHNVKVis/Xg  
VRw8kcF3H0l2QAPrdMtxk3Fw0+244q1ge9QY4T01sxUHsm+dOXQT7dCjt11j  
rjTxsGpOfsrPZlCqFA68fcQYDxL36Bj35tmi3NWePgJfPFwuf+GZ0mmD4kMk  
H9ArxQmlw26cSfl0+jlAaPTRiIej0VIXOPutUaDsxJ0enXgIsXETGwuyRq4/  
MirOW8VDb+1bprOdVkgnyPEKe0g8nGQhnTCLt0Qd/XqXgqPjgWVsgdPupCVS  
krqR/jopHj4o8njx/2eBxOfNUq5cjAcmCvuzwBZzxHKuIZC3Nh40f57P+9Ni  
ivAjvnt5G+Mhe17gy19IU7She6SQpz0e/ruXJdXZaoI+iVzr2d8fDxsr6/zj

vaeQfaa56/6hePg41nAjxO4UGthhXOeeilcqj7bR7jlj1D4Rf4R7IR5ynRgn  
VXmNkZyxUtu+tXho6F51479nhKoe/LDYtx0PSS9juLQtjdDVHLckLpYE4Cov  
d/+VZ4j8zQ3GOaSosQ6FttLYAM083A3mUEiAXksP5vN/9ZHdiTZ6DvUEmF8I  
PdZ7Tx/pMEkrsp9KAP22SM6PR/SRwNN9l1n9EyDVjUXGUVAPZcm9FGMNTwBX  
woPWhSldxFCS1sESnwChjRmNbSW6aC1h8xtzBvV8y8gAnaQu6ld+r8tUmwAM  
zmc7F411EFTkTjA2JsAib/F/7Lw6qIXbMoyxPQGOPD3HZPVRG5UvPy1m6E8A  
osfA5MkkbRRfU/2bbiEBlieM2RefAFo54JFFt5YAokib1HENkA9Z8DjddgIo  
RUt8yfiHZO152WYvSyLkDm8pYQcASQIFntBKJYLRM7rAy1sIlV6QMaBVSISK  
3cbV7gaE+LZnp2jUE+FPNUvXG1+E9ow5sNCcSoS7YoJzujNaaCIL8/7nlwhT  
S8Syic+ayHJ3689OWCLce4JSZ6s10Yugxqs7cYIUPYLELoVoosZTxx7/PZ8I  
oJvhfplWE12gYxX8U5MIZropPwpVNRCHYBGM3EsE5htCWCazBsqSl/FpaEuE  
98+Gud9NqaMcV4t7nn2J4PSJdgtR1FFRa7bhq2+JMKR2M4vtotoSfi0WVLWS  
CL/Cb+dmt6qh0q/3r+K3EmFVioYwlKWGKrnH3ysxJQHjbyUTVj01JCHpt5eT  
Kwk+7wa+Nj+shmqxbYn5A0kgce4G/v0fHKoPPBR543gSe0OuNYa04ZBc6p2C  
mJNJIJrdNPawElcaC9AjK9Uk6D0ZG/4tCYeU7r7+cgJLgg4yh+0BTxx68MKN  
hcEwiTp/y62CT+GQ+vvVkzPmScCk76rOrYRDD38SbdvttkD6RvDH4yI4hFh4  
EnJck+DIIx/8wxw49FiksTYJwnMctSaNGhwSEdV5YVRcBJwyJoQU3+poudm  
Pd+PRFPr97jav/muigy87PftJCXB5HQJo+GsKuqLn1cZIyVB7Xc1D7Yvqsj0  
SrzzvUtjkOtjr67/VRUN3GIIxriWBLS94h58C6rIsqvolveNJDBnf1NXsaaK  
hoZl/sMqk2DiMGGeZ1cV2XzvWjt4JwlYGL1+XODEoVFas/5fzUkALRXnZcVw  
yJ7/o9bAwyR4XxmcJaqFQ50y4Z7Vz5PA0PzH2/0000Sqv/c88VUSTB03Fb+Y  
iEMzTjn1zsNjsFXb4mB2E4c8wo8Nq0owlwR5Le1gbwKEv6S2/ub4kgVom8+2S  
XRzyKTE8/P07VY+PSyHxymro2/1xve6fSUDsUne5FaqG/F/5+Zf8SQLukgAD

k3tq6Men7cy4vclA/HN7J2NTDYX+vnD/NGsySJK2V7QVUdrnEKTmVuTwYOZ  
83DYNXW0oYmJfzqSDEfrHlrjTTRQ7Ok3Jg+lkiEUP+X2s0EDbfu5h+UqJMPU  
zX1SHwQ00W5u6sNT0smw5VWQoPVPEzGt9lg3uScDp1K7lt8sQgKVLilppcnw  
uH450TpbG8ndjZQZu5UM1xdTGrpGtZFBR/6kZEMy8A+3cr4X0EHhgZ0qrzuT  
wVqDGMBUqYP6d0JXDk4mQ2Dtnn17HuuieLsr7g28KSDEpMTfzWiAstzvc+4R  
SgE1XkPTKisDVbX4rtNGLAUi1e12C64boCGiqMC2QgrUeOR3Z500RFIN94b0  
LFOgIsbqSYWdEZpkHNKdyEiB8Wojdr8U2iNe2NV+moKiLscY6L/cAoxCQuU  
phSkAFPug2tDYiZIScnjr1h1CqSE9yZg603QRbe15pDuFMA9euq3jzrfywP4  
PJ++SoGSY95GX36ZotZo9X28wymQ9BOb06Vghr5cJAa1f0qBdStxgZBqM1Ts  
zJy9hwYpeiv+erYp5kjSQ3Chbi8eBnxJPEX3zVHzORltW0Y8pLjPsZOnzREW  
hOX/Y8FDcGejUAuLBeoPt1q+xYGHprPM8ilKFsg21tPAihsPHifYlXudLNBM  
UtSNbV48XN07wxeLt0ABqZRfNw/iwfHlzWdR5RZo173AxEyIWs87XqL6iQUi  
XK4r3xDBA2MLSWHjvQViy+n8XSKGh4MlcwMGmxYor+C1pbEEHjj2uEc9ZrBE  
R0o+3lo7gQdur+tt+lyW6E7Fz3/XT+Lh2FxTrTi/JcLV0tvpK+JhMFHjkZ2w  
JXrWcOD0kgoeyvieBfUdsUTm9yXp8tXxIFo1KR1+zBLZ6yxWZyE8zNHt0wZx  
S+T+ut7svA4eHiRVfh4Ws0T+zmFrBAM8XPft4hURtUSR84p58afw1PeF7fg+  
QUuUHL2hEWGOB/dfFdKF3JalsrdtJsCa2q9+5/4aRkuUlZVA8rLDQ8ebUCGX  
XxaoUAhJuTji4Y2/u5bysAWqqKV5beuKhy0mwvn2egt0R/VZhLkHHpATHd1/  
qRao5TmJ39AHD9f3iTSYnrZAJ62MOjF/PNBMMV06KETVY5rFAxeMh1j/nyX7  
P5qjtwH/MciH44E3iGdBoMQcTW1l1klG46EvuzSI84w5miVZWx6Jp+p7+ZX0  
IJM5WuHmXRdlxoMx+3+S0GyGfpeMFewn4gF7POqj6WCG2NqdP9NIUPI8azMn  
kmWK+AwPp+9cwsMBu9sPXCrm0eHhj9IbV/AwX6LNdrHZBCks+UTPFehAbEtx  
BfpOIc0EScGZG3iIQpkhz0ankD7T4qPxMjzUththhq+Nkf2RMOb+GjyMPiuq

rOoxQsl2CUW326h6i0T7ZmYboPTPWtqVndR6QmV6N3b10ZVQmtkbT6h8yCgL  
Sfjpo4oM0snMPqqem1UFOGU91N+V+TTsHR6EFPkKPzRrI77jFd9UfuNhdm8e  
v9o0Dok0+1w6uYMHB7uw8xNpqkhSW1JBgpYAI3pXbuZlqSBNp/qEg8wE6B3s  
SnGMVEQema0cf/kJcD1C+WA3lzQKPJTQ9OsQAY7/GNvacZFEUTVa9j9EqPv3  
x02S74ij9GdPy6YlCMAvskqbbyuKGjZfKT3BEUBJR379ohsr2rM7LhStSQcj  
UeW+6h5aZMfwleEEEMC0u+xiS8uKVg376vIHXLAAz41rpbmzr880+M5hgTg  
EijKanRZ67Q8xPzU2IQAoTTHL+NUaLtuHuWt+2d0gDgfjeG5e0xdG1KiOU3W  
Blg8FHGdJp+z65SCTJKvHQESdh0VzJe5u4rV1HyEHALA+Bllv9DJ27UK+hZD  
LgSQOpOM/6jA36VnZIWjuBPgBf83fzAW6Mq3cBHV9CYATvz4+P6/gl2Ldn4s  
q74EcAtsSPc1EOrcXKN+VgYS4NL4L02To8JdV70JU46hBKiwD7jfe0m4azbw  
UjdnJAF4JsiNP/DCXeqRbfXPYwggcarj14tNoa5LCZV5cQkEaMIN1HT/cahr  
hngPL5tCgBN30Kk+Z8EupYx0v89Ear34qGIW7YNdlCt91vlkAmwt5rQpX+Pr  
msgf0TDLIMBDk1fHHifv7yLc+sH+4AqV76J3LtdvM3cN1//eCLhG5TNOT42n  
ZE+XRAv9jEgBAZjG683GWzc6B54LNWaUUtcJKndoF6e0Dn0ys3NtIMCFoJ05  
mUP7UOi8A7a/iQAhQqyKXR950LMVb4neFgKwyYh68ufxI//dpG35LgIMVEZK  
9nQcRl0MGZ9nnxBgz7UiduUsUbSPI/fV9W4CyB7JGG47eRS1Hqovpv+PADfv  
OarrTogjNrF2Svsbav+XZhp7icfR2RMvQkOGCcBcEzRK1yuBGNSndd5NEoBi  
n/EJp3QCOWgvnLj8gQAIRLXKOQdpdNtog0f3MwGurPm+6o2QQafPcMzdXiBA  
zxvK30zCSVTIKvDGFyKAqf4vQ/jU5dC2t3gb3xoBlisbfyjdkNmQQrlL9cj  
8DuFIDvIJ49KI9EF/G8CnJ5+9C0/Th79SjgVqbxDxVu1PqQ2LI8MU+1cFmiI  
cKqr9qa7uAlqzPAwKKEjwgrLuX1dlQpo6UrwSRsmIuDCG4f+NignnYJ4fmY2  
llx/x1P8clYBXSSl03ZxEqFUnE9qfL8i+nbr6kL4fijQf90yb1QUkWZD8dvj  
B4hAx8Tr6m6hiLJaah9OCRBBEq932sdFEX3ubKm8lkwEdfhjU+GtiFS6n142

OELNv2J6/I6/Isp4NRDz5xgRMuUHARyCFZGz04X6XUki/Lt6KaeaGssuGH7d  
K0uEjL+Nc4ep+2ni6A4xKRBhg/b3yAg13xDjE2s2FSIwqB7QsHRTRBW5See5  
1ImQeLJ7jcdREUUFU3/Mg4ggmNI+XnNaERk1b2zw6xChuq2+N8dMEQnoNskI  
GRDhS7hDsZORilocDPESPUWEHBSunKaniLrcpK8fMydC/N27fjk61P6Wvw1K  
WhPB0fkVH7cudd4kVzLJ2hFhcySRP9VAESmxe2AKjkTguRd3Koian6FIOFrF  
lQiRhPh003tFNC41eVvdgwiTEyr1z88popq2vM/lhwimP0otNBIUUbyRjYCu  
P5VPV61P9ZmKyHSMY8owmAj3Sx06vIYoopVf57ssoong2kMv/HBQET1NNVg/  
HU8E5iecfAHziiHe6+0fTIR9rVekv9Lq4RwcokFbmQilPe9a/isrIRYHuHe  
eGUQYfq3KMHYSglNma0z+F0mwoz1kPXdiCWEDwiODMslwo3as8MINUqot8rN  
glhFhHciE47TssqoUFmITK4lwuEeLnWx08oo8Pm7hxn11PthdS80M1YZcX2y  
lspulcJeKQV3uWfK6FMop3teOxF8Bj6mTc8po+bdl3nXu4ggwOvjss6qgs4I  
6dNXvKDqR3Px16SVCpK4TatZ3U8EytkdvoAIFbSt3hV+e4Cq99in+x+zVVCx  
vepM8ygRhDjQ50gGVVDo3E++tgkiCKc4hob8UEE60XfNOqeJULj38C9gUkU8  
9EFpTz4RQXl9OsheVBXNZkt2dM8S4Zo8MfMaThW1Hpld7VsgwtncFZZxM1WU  
ca9cYmCJCKq03Fd33VSRM5w9O7RGhGcWA6Pfw1SR7GvB3NENIhgcke5Mwqsi  
GtfxVxPbRNDLA7X4S1Q/sjiz98M/ljA5aToFl1BF0SwcYXMMqRCaMTNO16CK  
jAr6b31nSYX3pwPCSa2qSECCMr3MkQplxzuysSeqaLFFl/cXdYoUK71g1upT  
RV36NKZbfKnQUUMso7xRRVnDD4l/BVJh4v7scckxVeThGddGczgVPIK++Z14  
r4qU1pRX6I6mQpN5slL+J1VET1gTZz6eCopqxTZxc6po+rNA5bZUKhy0K7Hs  
pvqhFgPdo4uyqdAWIuJ9Y1kVXA4JKHuvkApLGGWc5acq8mHLOfxaJRVy8Gqr  
fBuqCIU8vPFYPRXSvhet92+pIr6hL4KNKBUK1Q9Iy/1RRUtK7IU3dVIBjknF  
WO2oohd5yvyzXDFLhnrj2vhbVHxVvu+SST6XCc/v0n/+ofi3ahcwTa54KvkuF  
l0v24JD40TEuJ7tUEFnNLKyix6F/pN3Lpo6psE+4hk+Ukeqnvh1nR66pYK71



51s5Ew6R62OZR1SwX/oQdUXVqp/2ldG4fZPBXEmhxut7DikEtlHTxecCgsN  
pTQPqX6MY2w1dT0sFSolpUa39uHQRJrAnrmoVNAfyToax4NDXUU6+PG4VGjn  
Dl0yOIBDubv+//qSUmFN21MzUACHgj2yEzslqTD1lH7/TyEcMuju2L5NSoVz  
62sxX0VxSFjiS2zx+VSwvTbmaia0QxsZbJuZl1LhV9TkLuMJHKqydPkZfi0V  
MuNSPuxXxiGGqX/fcZWpYPaRvr7fBlEm0XF/qZpUwGvfrNlnjUMtZRbfBO+k  
gutj2cvX7an+7lzp3/NqTDeOmaL96H64f5ej5XWVBiiPcs3E4RDfDKrMx8f  
poICU8X0hSgcerGm/f7581T4/F39zyAJh4pt/Z1aelPhSv7GUuhlKv+tV9/d  
epUK7mW6z73zqPwnfx7JGE6FIz7eA461VH6ZSQOWX1LBeP+VxJZhKr+Bd0x1  
vlH53SrNN5qh8vt6pF9xMRWuR8+z6i1S+cwR7+H7lQosHzYb8fRqqGvTXJ9p  
KxU88o8/f8GthnIdY579/pMKHBmeczykiashApPfr1N40ELz/VthWSw0Jp65o  
DTCmwURnGFe0qRra+Mr/8BFrGlTfWB7Y76yGqur8Wsv3p4EMwTXodaIaYIRl  
ved7NA22ZYdMLjxXQxi8SRF8x9PgiQjtOHIUDZ1aXVJ+LpUGWkYDr3a/qaHL  
dUPthxXSQHG9YDSMUx3xiRQ+H4U0uLJq++CShzrC7bBS0vTSwKljZLguVh05  
TiQZKxilQYNS2fEzmeqoOMd94JfGjyzYdF26VJH4syS43quaeBhQWb6JaKB  
jGYLC9fc0+CS2iCSV9dA/s/YXEq90yDnZYzw9dMaqD5p5eOfwDQgxw+tD5M1  
kMrag++NCWkgyZrfS7ukgfQnDXZFctLgtZySkEGrJvJpbX0yUJQGbfO5clfe  
aKL0a1JpiaVp4J+IuZz/poleWXAwj99KgxcnXYTdd2ghm+cj3JktVH58K/a+  
DtFC0WWGI5rtaRD5jKvyZpoWyk9uy1voTINo9da8r/laaAp345BBdxpscDRd  
vPJIC/3j5fzwszcNhFr23vg+qIVefuLLyl6lgTlhbkd2Zy3kdcdLfOdtGhxy  
UIirpUOInDH6rXYsDdwLrHxZeBCqPmdUZz+ZBjSHymbjylCvp157EMOHNHhF  
Ojx/Sg6hRVFpueZPaVCQ8DjdUAshjt0ba+6zaaBRfvMFrTFCclOc9zkXqPwU  
V9Wsn0bIuo0Q0/mDWp/3LW7ZBaHI3J9qAatpcK7ueMKsD0K5Ed5/+dfToJL+  
ZszbYIRaLce6XmylwWSvrnJ9FEITMsaEyL9pMF3A1BGcgNBflg7dIzQkIAit

cLLjERL+Js3wZi8J8re21AmpCEF3cW8SIwm2XovqPiMh5FH0deEEKwkijfxO  
viQilJpCNHvHQYIZhgGGK9RY7EuFyyg3CcQF7v83IYbQc6OeoLd8JJB2IxZW  
EBCVr/mkNwlkeMV7scMgCSE6brbL/wmTgGNges9EDEIV0bLF/UdI0PxbSN0p  
DFH1t6zvESdBYtljmR4/hGaxiK7nUiSQ8KepEnCn8l1xbeCJLANisxaCrM8g  
6v1rne5SIIFcwJhFgClCPUETSx0qJGC0osznAQj5Dv3916pOgmf5AhcUFRFi  
Uj3M2YKoeAtE46bEqHpd1z7cpEOCpeqLtQ68CBnTeJ28a0CCceHm+VtUfTP6  
qi1qzUkglF/QXvtBC0nJvix7y5oE20ZMH+1faqGXV3+EVNiRYLM9B728r4XY  
nBWyil1J4KPI27tM1kK3H9uUXvcggeOfs+evB2khs2Mxd/N9SBA0Mlr7z1oL  
XV7qeHM1mASsajdx0we1kOzp6ZnMcBLwh9ao2fzRRK8f0KxejCaBrnDW88hJ  
TcRF0N9HSSYBj4ZbWXWeJrqy/7VVwmUS5P5szifsaiCF2FX32KskeOPmy712  
ooGGpvaHR+WSQOtPl/3PWg3EXWV/NaSYBJncD5qvW2qgHNynlc96EvvzTLwg  
maG0IG7QfXZrJAHp+treHht1NEJ7/KdLCwmODw3UTQpR58XLgP32XST4pSvQ  
5FKnhvJd1k+bDpAgoaXqiX8TDuGeHvAyHiKBWen66LkwHHonrh5pMEoC3NGg  
4KcyOCSwkpwD01T8dzIvPyxTRUVEphGlJRKIPN6/wZuigkpuCdoJcZAhWEYn  
K1FcCWWQKbWj+8gg9m5bFzejiCK9f/7L5CXDKk3QSYIC6nv26Mtbe4TIMNWr  
ErjAoYjWiuN/z50gQ/OZkOaZHxk0lTRrVnaSDATavS7iHfLohbN1uaMidf/J  
p+0nqH7huoCUyX/qZAgXTrTp2JRDernvihqNyeDo/kN1IEYOyUbprwaYkYH2  
+jhh78WT6KDNPf1jVmTwuLTv9wr/SbS07/xSnj0ZzvVV5QhoyKLxlV86Vs5k  
sDjwMKbojQx6+totj8WNDL8oyVrgJ4PyLuEg6RwZ5t4lLsVWSCNiYEWOSgAZ  
Eh+F5Z82pPp1E6755WAyRLwhlU/+OIGA+dsVj2gyPE1MskkxOIGkvp2eFYwn  
g9shgY6ZLSnE2/NiFSSJDF3LhrvxDVJoiS3vsyGJDDnqfTe+SkqhYc+90Nrz  
VDwtly1/fkiiRzohF9svUvsL/io12iKJakUnZyKyqHi+2LzLS5NEOTSGyjI5  
ZDhWhC/zPCOJkj80np/NI4MEX7eH80lJ5NslPF1ynQw8I8l/K9gkkfWNDAWH

EjKwOrGYuy1LIK3EDTL3TTIcKX96IHZMAkk4eUy+rCJDUDG7nJ5nEohbfeAk  
qZYMrs8vx0k3S6C//OppqJ4M5N9BzverJdDsZuX45j0yqB/aOxxaJoHejO6T  
uXefDGVsE9FBxRko434Swb+NDJ9qkyfbSiRQVc78yNFOkt6xxHyvSgmUFWEr  
9f4xGS6FueklNkigeOsnynbnPyaDreD+Ks0sCecnlvLXoJYN/GOMz6UEJZM5V  
cJz5FRmk8j49/frNAqkt0yU+fU2GxrohVqCXRGIoW8S3pJBNNNT6bS4JOK4  
MyWmPEaGXFHRt1KmkmjrglHc0gQZNHTzkkeiJdEn/+b/bk1T8Q9b/edeJYle  
GYscf9EhgfNU7bTE5LogcTFaIFZMsw/f1bvWCOFyhm3+t/Ok2Hhy9VgqnVA  
F2c9D1/6QYZXv0ZOUHKIUHT36wiDVTL0DPMn2X2QQm4VGr27v8hA4z235Spz  
Ail77A8L/0uGD3xn+m3fnUDivN/ZDtjQ4GTRrmiCsJTi631a/WgvBUwtroa/  
z5VGGzLhM2ysFGhH3b8zqfdxdsY4sYmDagPbbPV/JmTQWLYovyM3BYK/XLKb  
tJJFrb/fWNw6SAEHLcNFxvIkqr5d/d1MiAKecneSOsZOoKzeMovEQroHL+t  
HK8gh+K7Tz7SlqAAAnsmEyaJXDmleuSw7pUIBORvFuxIHFJC0nk8/UZOC5TRN  
753CFZDQppaPJKKA/ZOLSdffKKB/zj9uROtTwJdONMcpVxE9lJBl32dDgXFO  
94slhsro7uTRmgdnKNDxzebJRocyKrv8R8/ViQK6Y7VeVxRVEPFxbWKdBwWI  
kWKRT6VVkd5j5kX9MGp9MTlaUUU1pBTxkbIYSYFqBc4LMXfV0DHxtqPZsRSY  
Jzl8ZT+hjhgu+jrNpFAgcMaw4wqfBtpAsElOpQDL5CbHS+p7ZW71QLYMhQLr  
NCc+T65poN4zPf3xlynwvVmhU7BTE7WylPiIXqWAtcr+67kCWqimM3pP7zUK  
NPddrsGHa6HCUPPi4AIKVPjWDac810IZR8XVeW9QoI0thEmdC6H40Z2RjllK  
tDZ8kLO1Rcj//EiYRwUFLz2qsdkI+SoeYeduZoCUu8+cBr0I2SynFbTUEeB  
PacTis/9Rkiz3FnfroEckY2TgwQRDEnbKn3820gB8VWGXHUMQ4eY2JJutldg  
NdPeMVVbDLF1fOY/1U4B4Z8j+MMeGPob1NG80kmBRzWklDxvDP0QybbMe0IB  
Z3H+R/pnMTT91n9Rq5sC+zQKtD0tMDRA1kn/0ksBS6034k/UMdSlJiB24RUF  
/uN6pnL7CIYaFlcfyb+hwGgvY54II4ZKS/qcxt9S4FmsUtDEN4SyrMs2k8co

8FPxw3RUD0J4+rjsY5MUuMtevM/ijkJhrZYnX01TQO8g44mridT3kDDNuYOz  
FPDZL1fNIIHQE/t0S84FCrg8GRm9saGF5LK510mXKEAQpjD+e6qFOJhE2VfX  
qfhqab9u22qh/lXtpl76dOD2YuznCbEatL9RV3M6RA916EjIKuJqn2syc3s  
6cBc7l3TsKKByJMeDqW86dCFv9RyNkoDaXen7sYcSwf6yXL+Yal6urvLOh8k  
mQ6a8VIqDEbqSFg9Z8hTJh2em1J6TnGoo7/1FZUWyumgnKkdMVmshgLmpTP1  
1dKBkXC2ItNPDU0cvR+roZUOQzVvo8VV1FBrfrfjcX1q/gpM5tUIDh1/a6Ys  
ZJwOxpubx3VrqH6MfVR4v1k6aJAoq4EpOERv5MrEbJUOvZfNryVR/VEkcXb1  
n006vLe511yjhEOfHwZP/rJPBz9+uoKjVH9nvbnxfME5Hc4INHGKbqqiJ/Ip  
9TNu6ZB3XeDyCNU/ywUy5o96pQPP+8LDUb2qqKQqk/DKNx06D+e8Vnygijg+  
Hgh4GpgOKRU+Nfq1qihJsNSmNTQdDG+Ht05T/+eLthKoPjld9sTyMykWqyKn  
rLvHK2LTocSo9WZ0iSrq78ftK0yk8nu2Mfd9pSpSo3+ynYlPhzun3SqF76qi  
asz4CyktHdJn0zlxO1TRgfjB/xLS0+HHiTOM8n2qiNzs8CDsYjrMaBqceEL1  
/16S/hkuOekQdSwizJnqx996rkWczk+HgydvvZFmwSGd4ngX46J0sPL9NjJ2  
CIdE9l+QU651B+J/yaZGejiUabZf4ER10iSf6N8eovL3j3J9r+htav9CnH1P  
qX5y6m/dKFtzOvAdDsec83Eof/ZV4pdn6VDguH8e+4FDjKK2PhM96ZCzr3zx  
Ia0ainZ6b/HmJVvvsb10zbxqyObNjyMP36ZDxGOJb4UaaugZSzRb41g67E/8  
vGphpoYU9P+t35pMB5MKKQKfqxribOfoy/6cDvX3Te8lJamh3uCZDf25dPjP  
aiyD94Iawh9tFNtaSIdls8Xji3lqSG081bp2KR1exvFkr91UQ2sXbfHOa+nA  
Xjk+erBBDDVpH6/n2EgH35In09ZtashrY2vy8e900I+z5858qoaE6vqZI3bS  
4Sgc0/yoXw2Nni1SPUZ7HmZJ92SHB9VQJk+w9xjdecC/I5k8GlNDRn1Y9nmm  
81DBcgIfNqWGajL3PdFgOw+085Jjkx/UUJvC56UfnOf/V7GVh0P5dmFJQqWy  
lqSSVMg+j0107Hv2LZlIqPJKUkqL+DVjZoxZhSQiSwpJEpIoZUISoRQqUkKl  
TZbv/f68r+eds9znPud5zqXQ1mKJ78SgARwaqZTPkaSgyPiXzMUH1A1DJSrZz

laWgV1m65Evi/L2zd5zQGgomBHjuSiF+n7VIpaBKgYIubavnSl8bgEfNv+dh  
ihQ89WCfgAaxz4ofaF+wRpmCd6RfRM13GMCjjZc02rdS0CbQKt/zIcFPT/Su  
U9soWCl5IX1DHcEP3SxFS4uCRw1yn5y9SfBjKnXnvS4Fa74pv6IUGUBwyW0p  
G2MK7uXdHn/EMQD5AIrZ9HYKKt531FKgGkC3lG/0NXMKCv07XOd9itjXE+Za  
V9hTsGdV0oY7RP+quFgm9voQ8YbYKr7ZTuSzSLY8ZRcFbx+cqBEI+jmr5tNb  
k0AK0pJ3xKerEfkqFk6uYeCfxtV5/kbiXyUala5YRTcYuUwJLuGyKdnV5h7  
JAVNNY40bJYk8qFr8ISjKXjg4j7SqyUGQDZb0FR9mIKvb0y9IS0ygG+/ur5F  
HKWgZjdYp948GYpLrqxbG09B97XXZk/9JUNQQKzj0wSCj9m2viVTZFgjbRN/  
5iwFj73bbtg/Tobux6uLdJIp0Kn+avzXKBnoCV9efqRQMMg7pNX3IxmsdOqE  
0ukUXN1Smys+Sib5EYa2XRofAz7fsJboJ0N1VkDADlEcz1RX0sN7yXDQRZtx  
PZ2CD39XWMq+JIOKsFBtQBbh7+5eC4XnxDyqeTEqkUPBD0ML/M50kiHrwFXZ  
5jwKuva57TbvIIOH0jHLo1cpuFRcc8PeNjKI99od3lpCwV2fw2ImnpDhIV3+  
8uvrFGS+7lR995gMp8zGO+gVFPzqaChnQGdy73sz26soeK/0qIQAgSdL0lS+  
36Gg817fET0CFwUEe1+po+CX4dv7BggcJE1K9rxPwb703YfmCftrnghXijRT  
cOVyW+8kwn93Qs9gTQsFczhff2sR8Vl9ijdZ10nBsXXKF3qfkSFBaa56fTcF  
W9NOuU0R+d0KOK2r2EPBjRdONsoT+Sv1nlPdNEDBRav7/sT3kcFXevFV5Q9E  
vKMHd+W/IQPLhaK45RMFVyzYUH7/LRkWPkgvVp2kYHOfkd1EJGP8Aqu2hSh  
p/we76QPZlg2Y61Q/0P0X+rCeJVhMlxNkKJpzFDwrryH9OURMryt4S3WEqCi  
6t/w2KFPZJD5vSpRW4iKm5+9HRsh6uuokzmnIOLF1870j4o/k+HcgbXHSUup  
eFzJ113pCxlqSy791FtBRZ0/mU00BJ4a2XCQLEXFoHexD3MjrKp0ZcxgFRVx  
izC/YOz/+IIOm5Kn4uUWBxdLQk8ZWYXvjddTkao92RExSYZnPSq7QYmKoj3c  
UcEfZBCRLu3bvoWKW1TfH//7kwzoouFpqkbF8Ysn/QwJvR6llz8z06RieK5Y  
WPkMGa4/1nG00CXsF2sctRMwgOFFVS2WZCrmbmEFf1tlzC8zsoW1MRVjGK+E

WYuJeZtQc88Gqai0I99wFdEvtBpjIzsLKt7pzek5IE7M31/1VfY2RPx5B2r0  
rTSAaW1TbUcHKjbK375jJkXM4wMPSnc4U9GmWr6MK2MAESWWW53dqTgwYnk  
0  
fjUBXB55dMXFm4rMtT2filYbQM9Gu/VuflQMaY17ayZnACsC2jLdA6i4N7hd  
az2BrbN2yHruoeIVr/jabcT3CT2dLK8wKirKbfH2kjWAKik3cZ9IKo7JH3t7  
nvD/1fkFZWc0FcW7JLdeX2EASnSvRX4xVGSVXFx5k8jH73Hv6V1xVDy7pvZg  
ItH/7EV+M/4nqDjCltq4ZI4MT0zfHg04TcWOZId5EsGvYELAj8BzVDQOFR2Y  
IOptUDMUFXyeimZXJrOV3hF6+rXn8x4aFYcrrko3EHou1B4JCWVSUV0oe+31  
RjK8iwof3MuhorbYmrS+ckJPJV/8wtOpOKmnaKt1iQw7Rvb3RGRR8dAMY102  
lQxjGyfdInOo2NomPL40htDT7kNP91+h4gI5DUa4L6GnzCm7A4VUIPUs7b2E  
hH6k/poeKqOiWrBpr40QoR/n+LrDIYS/VbnIHtKHZ7RZ8pFqKjqdG78TWq8P  
Io9PVcbWUjF5dZvCDb4+4CJBzbgGKr6yHbDxjtKHo6bnSo41UTHgv86VO8z0  
4fpj4c3xLVTcaGHmdkJSH9b+ElNI6KRi1EIs0CrVg53Cfwciu6no/LEzOjNW  
D9JlRvJ8ewg+vAvXipnogYT+g60GA1RclWfbV9RAAmfr8rHNH6gY0anYUnmS  
BHSvSzdkPIGRbBLoHqdPApG4eNLUBBULz6oj9efogtX58D9DP6ioUNGyyNtZ  
FxLTve4++03F2o5PgdtnDGcuWsf0xjwVH514/lHYVgem/n5xiFiegssit5oG  
V2qBtljch/JFKx7cNdl1VILDsi1dFnLpuBE8HLRR8804bPhFe9N61Jwq6d2  
mW+tBgzE++0ZUE/BtCbHI4zzqqBAs9v8VDsFb77QSjCJUQHfLPLnOr0UfKp9  
RtApZCukX1MuvWaYghrTj8bu+2+Bl7VS0ZmQgsp2rM3c4M0g1S6oQzVLQZpp  
5MVHscrg0j/5M86K8Dc/SPb03ASMr2+r99qloPPIUx8su5WgbbYt3nNHCu6z  
ekZNVVICMfG7Y0magrgsWEY3dSNYKxQt0PVMwVNS9w9qy26Ec+r8JsWdKZh6  
/Oh/lHuK0AhJ/630T8G/uyTMyCmKIOB02E4giLDXv5ZmclIRTHYHLpsIIBCs  
snN6uicP+DU2R+egokqt+OsBxSh+pQJu21/CoaTdk3aem2EX6mqnncPEpgz  
anJKQAl0clavLj6Sgqq30utb05Qgumzxm/RjKSisMLKRcWsTXG/4mf3fyRQs

9AgPoJUrW1jn+8DYMyloN3QzlHZvM2wdfKYUkpSCYna+W93fbIErC64Xm9FT  
8FazxHVXkioMrczar5VG5Dds7yG9Tw3WKVI113NTUGpGJ/F27jbIMAutms1K  
QStmuYLPik3ocXU/NpaTgkrZ4V72GZogHWxm/PpKCprr5JLvbNUCZqjCY/U1  
wr5Afs9bSxs62EuTrpalYPQ9Eu1hgTYsuTjtzask+JfwahNY8f+/734SS6pO  
we5jX7Ib9ulActPL9sO1Kdj0K7P+a700POhuYgY1pKct+izvw1JdEPHY4ebS  
lIKiH8Jv8D10IX5Raq96WwoSc6pu5qUuCDIfDvQ+TUG9azlk0tlQJWbGzn3  
PAXJTUvOKRqTYGU+aULjVQqelavkJu8lQbrG/199fSloUGSki8EgwfqaK7NJ  
bwk+Iiyiam6Q4KrFGyGtoRTc6R3tHdNGAvWnkkvffEzB8cjAhaQPJKjysZf8  
bzQFPXPvnP72iwTw4ayc9tcUzP8uN5QtpAfNUTUb+idT8LvXZgPtZXrg8Pfb  
lvNTKejTdpqfs0IPuh03aur8Ic5tH4u/E9cDX/FA/bf/UvDlk9yyocV6MJSe  
DpT5FHR63Rbb/I8EERs7LXUX0vC//cJ7V30hwbfsXy7vhGnYohuzdckrEsSR  
t7tTxWhYj/V3txD9L/Ag1pckTkPpy+lRZK+SQLznY3iKNA3bLnYYzkWTgBe0  
9qDeahqe9WH9NPMgwdqv7nGD8jSMKqyKmTQgwZWjtFO09TQ0yJi4dW0dCdQE  
m5L1lWjIhG9VaxeToJL2jz60mYaq+QeOjE7qgpGsDpeuSsP7/QoTt/p1offy  
RBZZg4Zzvys2b03QBTu13Lz32jRMWzggNtqoC8+qeosZejTUXrGzMLNWF7xN  
V1YYGNKQse3F7+G7ujDQanPngwkNd+5b9Dv6vi7s9TzdkGpKQ8ve7Lx37bow  
PnD7kaElDfWXuV7tGdSF2H0THR9taFhSjtcC/3Rh9qfyS6YDDcWi2l5TZEIw  
7rR/v5EzDV+/NNOM0CPB0iW8D8NuNLx6wkeS6UUCNrf9S5oXDd9MfukqOU6C  
3GLj6RF/GhZQvyskN5NAhRSzgB1EQ6Pna63zx0hQfq9EBEJpqKepkxgvpQcN  
3XKynP00pO6nRomH6EH/3B8dPEHD8HfjXjkFxP5H0TT6coqGsbeiBvU2Efun  
ZJgZL5GGM6q3bjCt9WF6yyvnMSoNzVBoaUWSPpy9Ke7NZ9Cw49bmz9eJfVUU  
rHabsYjz7cNm4XX6sMrt1v70CzSs7szpov/Qh5z+sRjzizS8oqcadGEZsY+H  
KZ0Yz6HhpHl/eZUy8T757pt44QoNL2ye218FZNA7yaZaFNIwY8ULs3APMtQt

bk2bKCHy31b05IIEGSxYghcybtBw1/X7IyoJZGiTN8yxvELD2fshK16nksHt  
6sGrk1U0/MI5I3iGuF+97/jMfK6h4W1x2aVTpWTwbzV1+VhP8LXyyxjtDhn2  
9G8teNdlQ/ZYnO1y4r6OmFj5r/chDV9MDjTDI+J+XzDt1P2EhjJR5sLvWsgQ  
Kzl0paODhvsrG67ffEiGE5ue/G3pouGE5LHg0w1kOKtfsePBSxquf5RWWFdf  
hvO2GXl1fTRcWxJnP1FCBobv2T+33xL8vcsOjshk7utTrrnXhmk4yI7sFjtP  
hvJH339yf9FwlLWnP4TIv6q3z445TcPLYRedNG2J98CXxkvUORrqYtafgyZk  
ajwtnjonSMf2iTRnJ20ytCxn254SpiPT8cbTsc1k6NgQn31MjI55GpvGoxSI  
97h08I/D4nRUjVRsmpYmQ5+lvU2UBB139PaPVoiTYcBL52KYDB21HM/erhMh  
w3D4mu9BcnScvmi2aDvxvhiLX2i9S4G05e/3q5sulMN3+pdML0U62sxD0zN  
6cOfS88nXZTp+Hgva4PyrD7Mld+1dFCh49Lbmxp7/umDUFNehpU6HT+dHe4Q  
J7DYy5QJ1KajXlBs85NpfVj+6bCFkR6Rz5fYjcuJc6lp3wskQzomVVFC3xJY  
bqnFuAYQ3/s4LzUi7K9XUDNXMaPj7YhI1uZ5fVDWlEpXsqLjwJlTsQVEfGpm  
M2MKdnSkklT1aoj4td0/mK7eQUea/EqnECI/cmgbT9KVjnXtXVC8lAwQV/ll  
mScdf75bmZiyktAbNQtFdtjx2ecDF5bIksEu6xxX0J+Ob84y5tXWksH5euTn  
mUA6Gpou1/m+kQyeDe7bf4fQcRiET/iqksGvy5jzLZyO+3jHy1bqEO+1D0qj  
X/bTMdppbrbfbkAz7RX6yBo7Q8ZjcvQ/n7chwSK5/p08YHe89NE1wciVDnFqz  
8YuTdBQV3a0140PsG87c4cdJdFQ8N/XhVRgZqEEenjZoodNTxqvg4foAMzJgQ  
Zj2dji1TXIHaWGI/TCcZ3uTS8d8DnySbRDIxP9amll4g4k89NTFB6K2wdtGH  
qxfpeH+nZ8xaBtGPHV/JuZfp2PpNQKqZRYbKgRf0rHw6rlHM7ejjkaHme90Q  
r4iOndV+V1wzyNAGVKcfvkrUN9GNu/4isV/KMGgp5XSU1pH8c4Tov9YtsYNJ  
t+hICn1M418mg9ytq8eN79DxsEKp8N48ot9MeyV/1NKRI9IptiSfsN8uVlrU  
QEeJ04Z+5wrIILbT2CqgiY7hTT/rnl8lw87h/e9kWugodU/0x99CYl8/dCmu  
vZWop8mp+t9FZJie61x57imh527/9+3FRL1SBEsMn90xW7Zc6STRfxmyuhbf



XtIxPSvBUvgaGT7nhfRf7aOjzO+nIhEENtTkx/q/Jfi7W6pVRGBKbcty6SE6  
bj21PrGJwFteqJqdHaXjR7eREhaBW74yYiYm6bh+dXhmH2F/1fGGZQVTdNxA  
sdy0g8Bhwt8L/P4Q/XLoc3guEU81ayNKztDRMSJArYeId/E6j97H84Regr89  
/0Hk41mSf0j0QgY+WHcShAlcoF+9RH8xgfsvVEsS+Vs5r4Er4gyscJo7pELw  
xXvj8GqnBAND/i2YJ18h+jUsIXqlDAMb08W1///v/fV+3hBtWc3AaxsFK8Jz  
if3izGBuwloGCqXXXKUR9eheJmlM2sDAkm/Smg+JeaSUYfHiixIDz6l9P7aE  
wDHKsVG5WxgYbbGtMjioZ1PF1cU+agx0IeUHPMsmw8IP+yN1jBgovt4km0PU  
30xa99kyOwaWOy/wOEecsy6HRDQ5MnCBmvNnFeL3Q9v4C+NdGOg+Kq//hcBn  
raZJn7wZqPatrYxCxNPVpfo024+Bv9in3U0JeBV37wrzCCD0k10G7Yh87h9t  
yGjcy8BA0bG8LUT+K4S+6xzbxyDeN0nO6wm9BDA3tmscYGD/6/7n8gRfAkXJ  
81mxDLzhH+awgeAb+xz2HE1iIO+vzwkz4j5ghibMbgMwUKPKKNT+OjH/vt/g  
faAxsPX51mnXG2Q4tUTysQuH+H7oyiZfYn+rN+7dppbHQJHU+W9Gt8ggdTFW  
vLOAgTLk7yNxLyPmJwcoFzMQNjpo/ZFt4l9r35H2d1yBh4/bJ1yu5oMkQpj  
zN23GEgdnBlIlu6fxgTKwYV3GHg6hrHHoYaYB9ubt00bGDjBiE+7d5c4vxQo  
OfGaga6930T21RL6Epj/wXrEwAMdx+yW1pEhKiCrW6+VgTVP19flEripweBW  
XwcDC2Hq0bZ6ot82vOImdBH5n1jQdY3A0WdiYhVfMtD8i4fZuntEvw6u9HrY  
y8DeL3OnzhFY3uyGfkQ/A0feiX5/TeCYB0o1f78w8MtTqed5xP3WapFhTJlm  
4J6ufa92E3h9vv7abXNEfDmrTRQJHLvoxWznglTctKoxtov4fVvIobcxi1Jx  
aV/azmgCKz5cfm+VaCpqJd+q/0fEE6dceql2aSo21PociyFwR7Ld6YAVqTiy  
tiSgj8hHaWQkQEgqFTttX9ptl/Bx6yTTQtULBxYLL6f4KPzqqKiw5pUzDwb  
efoCwZeySIPgpElqvnyqGVdB8HkibNd7tmIqJoadab1N8N3VMv1AXzkVn45R  
nYulemzZmn7l9dzUHJ451p9M1CuBQko6tS0Vf5LjbZyJem61i7Z6pJuKRbdC  
VxhcJM6Ll23eR07FAr3iNdoVRP+IlSxebpyKdnsq/IrKyHC69WOLp3kqGlo9

e01N6OulamLRtFUq9htuesgk5oEabT012y4Ve/zmtt8k9Njj4Gs/7JKKSUUt  
hrcJPauX/lGleqQiU0oyLJ3Q+7llvKXqPqmYu+2/k8FEf2h2dLYfCUjF1M/Z  
d6qyyJCsHnV99Z5UbOzIpAExj98wlqTW7U3F0sGYnBt84v3hZOW86EAq+klF  
vXcg5vnbG+81iw6lYlzMSH0c8V7SXXFmpWNsKs4mTujQaYT+O+92cU6m4qSW  
v/mBZDLou2p5KNFS0WkHf4/kMTIsNTyVKMtMxdHeyWDNI8T3G9rLxTipeN04  
ylrzlOHvW5j4t8xUIMp7MPz/+6mPmfOriQVp8tzixs8ifslbvxn2Y1UHLsl  
9XPchQyJAcZKV26mlu9RdNycA8GPZs9p6t1U9NVQdm8wl/h+utzQq5Xg4+n2  
/x6rkch19q4wu6epqC1Q2/CPeD9uvlTCM3meijHcv5btoHQQ5T1j42vU/GH  
1eBlhxQZNoifujb5ORXf2c6sfkC8L4KUjy63XMTESgchZ80a9MFBLLrsAFjOx  
PqI1yb1aH/TEm03IokxUfsC9Z1amD0t+SUSqLmPi2stfA2ou6UNI8/WWldJM  
FHKYWot/Uh8WhQyfeavExHLBZd5RuvpQmOcxddSCiZ3NyZXbLujBbffLpU5W  
TAzNnj+ykKkHDxd9Dd1sw8TvicWZr5P14MPec70v7Zm4/GgrjRejBxvUbtaT  
3Ji4a1Gpp5OzHmRUrqD8CGRihOB/S1NF9aAoxM+sNZiJRW2elj8E9KBapvBf  
bggTDxaqPdr7hwSv4rZHuYYz8S533bqkERJImUS5Iucz0dmJG130kAT05ta1  
B04x8ViC91pfCgmyYmVfWZ1hYlriPTm1syS4tjmYqZDIxPvZAlZr4knwhDIt  
2JHMxjxVVpe89pNAeMfWT2oMJoKiS2mAGwmk52MuCzGZqDvwL9zIkQRKZQ07  
36QxkVn12crImgTmEt7tKVwm8ksf95UakeD0y+SKz1lMnGmbr4lVjkHqf137  
GrOZqG4TmcLaQIjsssKmjBwmOp7YItgjT4LajFt82ytEvOe1RT5lkqDVfoHL  
hgImtm+KvVy6nAR9Mw5if68y8amAtnMBsV//9f9worCE4Gt6doGqEAIEVmjQ  
nS4l7L1duLxGgASr7sdPeN1g4j7qfsuEWW3YfOhRoUY5gQdJKsemduFvo2TQ  
4ptMnGj2Mrv2WxcSu/3XvKtkYpZch8Tqn7rgnlTcXVXFRKIG9vr733UhWO8X  
nVHNxH/ZeZP5xL55aMTUOrSGSdxffxY/HtcFfBNyNaSWiX6te5WXftWF5c8o  
iOPqmThldXtb1hddeNtcundPA+G//tCy+M+6cK3m2aPgRgKPbrpVPKoLNldW

nw96yMQb5Fw5IQJ/pAfaBD5hosR3St9tAleeTSoMaGNiTad54XTi92ePFokE  
dDDxU5fhwReEfeffl9rDdnUy0nf33IJrwrxd4rcW/i4lJ6RK+kRO6MOYhvdW/  
m4k2fmLKT77pwl07A8qul0w0ETggRZvSBer2XaN+PUxcZtwmXUnw4a17xtav  
j4lBj0pXWxD7rPLW/CLfN4Q/n0vLYV4Xfq59L0r7lol2JWojeQtj0CTxNXzn  
ABO1Dg+mHhUhAWvxyic+Q0y0Crf9W7OMBAEzuio+H5hIspyUiCbqq/HNm+o9  
zMRr9YFt6atj0NaXY+f1mYltYc/fOGwmQcbTpmLPMQKLfjF4o06C8KZPYp7j  
TjxTmikYJvZn4euare7fmcgqM7h6xIYE3bnuqu5TRP6pJ7/PuhD7Mz8uxe0X  
E3taRn1E/Uiw/UyDves0E9VUI4zKD5JAPPZDicsME60fcDkuJ0nwJkjkqsc  
E99yVrWcIPolzt25zUkwDY0euJ6lzyOBIW2MmpNQGnqmbnjWk70A6TTdgin  
Yd7h2O7aeySo2Dzg4CiWhnuCBx2c3xL6lxcqdViahqpvxa+dHCeB08otyxxE  
07DT6Vug5TwJxqYPtNtJEPZ/LWSWKOqBcse8o41cGvqHFm4RPagHU40br1vL  
p2HM9ebo7cT8eHDbWtxaIQ3rin+mrMvSg4DLqR2WimkYkV3798NjPbgQs87J  
XCUNx86rD9ds04ewcPMbZmpp+Pf81ukjNsS889+73Ew9DY9Mc3Z9DtaHLusb  
T1E7DTnlyi8XXdSHpWu204NhGppesVo4KU08p9r/61pjniZrJwXfteqS4UdC  
p/tfkzS0OPHTSsONmPdDgT6Vpmm4c7dCEy2NDFeLzwWp2KbhH/bwjVwpAzAz  
fBlj4018303VNNY1BL0xid8/fNIww5ralbbTELZm+x575puGfRssNh44Ywgr  
BL+epO10Qynp870NnYbQ/3j5f4J70zDfoPpFwxEjiPPxuDB+JA2z039M6PYa  
Q+SS7DVtR90w7GLcaWERE9hdN3yx6Fga2mkaD+3WNwGrDXG5e06m4RaR9YrF  
fBOQHM0o6TuXhjea7z/N8gfifhqoe8hOw2tPngfNCSK85+8byi4n6nV7WM63  
3xT6dCJEDt9MQ3azr23ujCl0Pg1Tt76VhiuNb75VkTeD2sWhxyeq0/A2Sc5M  
wM8MeEcDJLAhDXW2gkjtWzOw8/IwG+xIQ1qxdqTwhDmUyWzP3ThGxGf3vdRA  
0QoKKkxafn9Nw+OX+NFZllZwcYfxe0tEGrZMriz4HWYF1GQDw5gfadjAG8hn  
3LCCPb90upqmiXh8gy8tMLYG2ZdbBENFWdiy4XPpCmcbSOBKBBUqs/BcuFFP

CQ870D0yqn5lCwsr+9aHG8bawWf3hn+XVFj42F4kMItnBx5SUVy+Ogvt1rd6  
mr20AzX245ZkPRa0kzzFW5ztYehQDvcsmYVmtpa0nVH2wHc9GpRgyMie02SJ  
+BR7EJTYNHMEWHjnBV/Et8keepmnNUKsWLhGVcPJRtMBGNFeMwE2LHy95P2D  
GVsHsHBWf+xxn8Lg2/JDW4ldoGz5myD3HSz0Dbz75Q3bAUInKjScnVmo5LN/  
++4SB1jzldJj78pCN/Hty3Y00kAyQ59n7snCxrzXlyHjDmAcJR683ZuF/id/  
+FEW0sJ3x48aRjtZ2Gwj2rl4lSPsWsZ+r03PQmOBTYYnwRGI8cRTD2BhhJJD  
l4+zI7S0YbBKEAtnd/OHtwc6gi5tfGZDKAsPdD3XWnDaET7va368NoyFH98P  
3muh08ll+yze6ggWDt13jDuU4QjuqoeDpSNZWN0bnzyV7whiS+w0V0axsDY9  
TsayzBEaPq+fXRrNQq1ld7eddxwh9snvxyKHWBh0/1GYyn1HUCvu4AnFsPDi  
osCzJY8cYZCSHywQy0KVguutz9scgRd+QnPmKAt9VmyPvtDpCA62br0/j7Ew  
rjwn83uXlwhuVXnyI56FT38FHnvx3BGqRRbwJ06ysNhxJYlM4KhPr4K/nGKh  
50aT6RXPFGFjy3XNkTMs3PDx8JRHuyP0XE2aHUokzgUsnGYJ/4z//J68TSL4  
GjLSm21wBlu90vy+/1io+Ge0277aEaatxPa8pLDQ48Ybz3eljlCmPKjZlclC  
dUdyR0ov00KlcPVs052F3VWPK0rZjiA3zHjyOJXgY3DgfXeil3Q2h/Cb01go  
GxxbsPqQIyTnG++5z2ahQeEq5UP+jmCcJKlVxyX4V/BkdNsQ9dzzebaaz0lh  
nToxfS1HuGpx/0nlBRA6ur15mCrrCH5K6fyyTBamj5mOd/9zAAmha3uuXWSh  
VOSJazP9DtDy3lKr8BIL12+X2zZb5wAJD+Tn8i6zcNHzosy2TAcYPfuEn5nP  
IvbJV5NlZg7Qt05h8pGrhL5fSNw4reIA2bX3jzGvsXCHtv8iK0EHcP9V7baw  
IIWPzs2eTSuxB3V2pVn/dRZKStRdX3zSHkQ1y7RulxH2rPbEuznYQ3341eX7  
Klmo340CDh/sIF04b86iioi/abD20zU70JyX/VWhmoWDFNONRoftYEs/t7Xr  
LgtFm6R+DfyxBbbzuf8MH7Bw9LZ+8qVRG4j6eipWqpmFZ63Tqy5ctgEbanzl  
+EMW7vxTqyHjbQNzDw6Z5z5hZisDmlsIYw/cB50S4Wkl5R7wietQITBTja  
08DCCu/6qaR2c1h11yD05hBR/wVX/mQdMofvXiQP+gcWWrft/fROxhwK09R0

TD8R9m2cpyR3mYHEojUThRMsnpaTyNw1iDDy5Xdo3BwLnUUZ607kG0HanXJP  
WXk2RgnaN5ekqINKRtLYKgU2fkFS2PMRNWg67nNWbj0b/dfsKHO3UoU/Rguu  
r1Vi451k6grjJVsgoN55kZiaG5WP19qV1G+A6WylzE3qbLy+eGHErN564Jz6  
o7lZk43Eq6wkp3wttGCO4ouG8UMfBINSbKg8WDipqYxGz+0qk0YvBSBlrwH  
ttrARtnLTtdeZS6EoHP8dzrIxp17tWPLls6a8Cy3L9G3YGOToemRCsv3JprK  
kpfjVmxs+NljN9aXYfjEeETP0IaN2t0Gqu3DA3VzjxhBjg5sXOn96G7wqr91  
6YVBF2AHG9cN1n5M2ydrQr03RY6AzG2s/p54wkBWqbwsXUzJzZWP06+hxR/ri  
+lC7t3fM3dly33z4v6lWsXoB1QonS082WtReY7s+W1afsST5o5U3Gx994t94  
6LiiXnfmJ95mJxvlaSjrQjgr69vbtq2082Njt7O2Nv+uRH1o6YKr9v5sHMN1  
mQcaJesFGC+MHQPYKBXa+0+gUKo+I6qoa0cQwc/jiOld+6TrdZ1OhjnvYaPM  
4X7jC0tk6js0XOZcQtl4dr9RePN/MvVhKzZx3MLYyLvP2PTzrUy94Lc/Wz0i  
2JgeNyhrteK2PutZ2z3PSDZ2ZZoMF8nj1utV5Hh4R7GRoVuq5z4rU9/Jivni  
E034dzC84XBbj7isM0Z30NEvb6M/8y3lqkXcpeX3RXDxiz5F2WHSqXrs3Un  
r/nHslHz06+k5hGperJ0k1lAHBvLvPzXIP+UrO/6ye8JPM7GoBhpWZuXEvX7  
Xu6LCj7BRjMb5XUXz6+sF7q9XSgkgY2r3mT0Ni5ZUZ/Nl8wIPc3GtOjpHn7d  
0npy3lhG2Fk2Xm6//o+7QLS+y/tuc/g5No4Phu7NHxSqjzRI9d2XzEaRBr2w  
L74C9cJywd8izxP45x6OXP+vOsPXYmujaWwUaFlqmRFXXNd9923FQQYb0U9U  
69qWYZOorAqbw0w2BkTY/1ya/Nskd9fOmFg08f2fiTLerAiIDhS1nshiY9y4  
uAVHfw0UFOssOpJN8JlUn05RWAdmR+pgfw4bC7dQRwuYG+CE2LPyXVclPj5U  
xnbe3QSTun/4cI2Nkx7vKs8Uq0MPxWqPQC0bI9fZNj5zMoAj7p0X/9QR+hGM  
9FmSbwgS63a+mrzHRLbxjWzenBE4V063G3zAxvOrH5X9rQO495aj2djKxs/n  
72qU6JpBgc77mcTXhD4h+spDZRswN4vU09HPxuGxKr2Vn21goOXXgZh3RD4Z  
4Rk6121Bzl/s/Z73bjR7VcQpIdsD47zWY8svhJ63VVHl3HfAkf5T3MX/2Nj7

xHlMz8wVJApFn87PsDF2YFOaba4rXD/EFvkzx8acwqzVZgvc4NPiq/GfBDIY  
EVzdG3DXDfy00wIfi3GI+VGoe0feA/7OeGXeX8rBZduoUrujPYD3aLD7jjgH  
a9RzBobue0Cn30/rYgkOhjwuMxXw94T9m0+dyZXi4NEvT3u8Cj1B7Lv13QwZ  
Djb82hcgOukJFv/Jq6flcVDhdbDlr1gvEF7eSgmU5+CsnWdve7kXtPCOfdRX  
4GDtn5q44VEvoCpsMRVfz0E7g887N63zBoeCl1kfNnCQE2h8+4CLN4irJ/2p  
2cjB5IeizcWnvaHzlo572iYOitcV3717zRtYJkM39m7m4KqMo13/vfAGt2bm  
EtjKwdMVLtG17Q1Sjtv3Sqly0Nb3l8mwwA+87P7a+FmNgwdHvReYG/lAul+W  
wn11DnaW2zROePjAzg92x/maHHQXVah+FukD8pF/X+zX5uAXCy25jIM+8PbH  
VS0LXQ6eud037gnDB3LiPelyehwUqj0kUHLBB4IWLhqd1OdgwGWXHx45PqCU  
ctPikQEHZ9U/1SjL9YFhiaCci0Yc9Auz/JpNnBdmrJg5bMLBlz/Eghdn+ECE  
4j0vu+0cfHsrrqWDsK9WvP/melMOBi0cce9L8IFxLfnlv804uEPr+vblET5Q  
dudJRLsFB1kc5QZXZx84aHrsYZ4VB1XOFi6javmA9uPNisdtOPh3B213xjlf  
mHJ+edLZjoPdTipfwz54Q1XPuV5lB6LevX1f+255Q1yADmnWkYPPpr/SX5zx  
BsNPg8znTkS8b7o3gY03zBxgjhW5cPD7XEfrXxFvqP8NNqfdOGgzZ9z49YEX  
nD71Nc/Tg4P2GkdxPs4LzBZnzat5EXyuC23S3+oFQql2vgt90HgZ5MXk35ee  
cD77qkSZHwebvm2eADVPSK0LPC06h407/uS0RzW5g7Pliv53IRwsPb9BSCzM  
HSTa68lVezm4bUN+pdISd+C9WTMZtI+Dn15GWrY6u0H2vxf+tYc4aGoleOj0  
gAsEJJ6rYcVwMFrSUIINNsgsoLtGRCY/l4KbrpVI71V2gQI7ZLn2cg+Xzr6Jq  
zjpDqYGd8YEzRH809XxKjN8BUff/8C0Tif5gn/x3esARNG2v/liTxMEYgVsV  
QraOUOktVNjynoOTARrCNzc5QOxAhfAlKge1t8gr7M2wB3JYYNARGgc/6008  
q5S0h9qj9asVmYRen2cKaUrbgYm5pfx6Fgd/bM5SkOPYQr14m4ICh4PemmKv  
qlbbwvY+1w3yPA7q6C3s3FVgAw35vRvl0jkYmXilJNTQBkwPBiiyvuDgROCS  
pVtfWkOj8cgWmSwO5q3xYM8cswYLkShVqWw00kxnvycrW0Pz86ltEjmEPtYF

zq7pswKrS/GaK3IjvtX17wuwrKAlQlBH/AoHOwxSQkMdreDJghVksUIOVr+r  
4Q62W4J9089QpJiDA1YX79FZltCWvtZE+BoHl1gsWfLjxxl6NFTNBMs4KJnB  
t+qesACnf+UWAhUcbLxX+3KmgI6H5Kt525yUE46vkWAYQFdu6wcpm9zMOJT  
54oWbQt4lRLo+f0eB6f34E8mxRwGRvgRQ0+J/uH4X1H2MoPAmwr7B55xENyf  
n53UMYOhhPwDb59z8L8LRcJkk83gg/TNmL5XHPxQuVomrM0URs07ErreEf2q  
Efi3ydwUlpZ7nOkc50ApeaNC4w2mMnb3OrHjPQd1UytV/ecQxg+Onn8ywkEj  
4U0tcBvh+yUhduMEMZ9WdYlGqilc3pfCbfjGwUGxS1GrxRCm9CTS639wsNCo  
5MF813b41b7uYs1vQh/7Vm/9//9nOHqh4FL1Xw5Ajm+2bV61Hf7s2ZZb9Y+D  
BQs3tix9C/Dvn+HVinkOPrWeUVoeBXDi0f2isgVcvLRuJ08rGWCOZXPt+klu  
1sb3PmhBCCg4llevJiLWu/Ht3Tnm8Czn29uFopycee8wvL1x0xA8H5wVcES  
Lt67H91zc4cJChkfvju7nlu3E7M2pM0bQ/GA/EDCSi7+Z5QQVvTGGJzDW4R8  
JblYqHHpqNBdY8g6vm6HpCyB9+mWRcUbg9nC1kMTq7g4dvZwzeFdxvApJZbf  
KsdF+yP/7biKxqB7sX0gUYGL66kPXiSjGUPfpmOLAtZzcSa+qkj5mxGcvq6k  
YqxlxD8i+Xiwxwja7sUfntrExRuteSWsEiM4ZLM5vXMzF20kLzsl8lXg1bOu  
2mtbuUg/nC0QfdYIQoa2Cods4+lbeQ17l11GsHTfCxVTDS46kujNeg5GUPHj  
tNnaLS6GGyVWixobwZxQT/oLXS7OXcxb+XCtEfA2J6taGXMxy7fgl+AnQzAu  
03JWBC7WeE6y77w2hCFyf8zcdi5ekL788elTQ1C3062vMueix6+Z+vFqQ3gY  
OeS82Z6Lf0ZFftfQDSHyJ/3IQkcuWhf9+KCbSLwHEgwy3u3g4jPfZ9WVcYbg  
n8p8z3floluFquqFYEP4XQ6xIju5OG3pc+WAgSFs+Z2RORrGxZL2K1Obxg2g  
45RVQ3MEF9OyzTb999EAYkS+f7gcSdT/5pnxFf0G0LdaVn1nNBfj3SJXGgz  
AG/j3w1PjnJRsdWB4VlqAHNNuR8LjnERHkyHteYbwBXHHWKJ8Vxs0Zf490Si  
AUz657sZnelilvleXESzAN6Ic5zsGS5mD3gfTD5rAMbRM1k/znLxlvID95Nx  
BkA54zZckszFjw5HkjDYALSnKq8nn0ei0Ppza3y9DeBNqMxRFyoX9dIEKVqO

BqDu0Lv4N52LYrs/5RvqGUCXzO6tZlwujq5jiLwWNoB4SsM3KT4XT/o6x3+b  
JoPSzIaakXQu+nLVGUtPk0Ho4Ac7ehYXl11evLf0FRnkr0VE9uRxccXUz+Mm  
JWRoVmjTLcnnYmnR0nOvc8gQlbZt9uRVLj4y/efawyODrFBqs3MRF/OxUAbo  
ZGiInaRvLCH0ozI9K3OODOGjLp6/rnHxYeIr/f3xZJDwu6nw+DoXuZ3KP+wO  
k6G2Q2oks4yLJtw0/5p9ZAgxjb0RVcFFcc9bRc17yCBe+eqoaSWht/59waP+  
ZKhWNkCpKi5q9Pem93iTIfBChsjlbSLeax8yptzIILZ0pvPOHS6qn2/Rf+FE  
hpsJuy7Q7nLx6c992eccyOD3rT5wdx0XDY7dml1qR4ZFe9araN/j4k1eyrk4  
GzJcf3nmu9B9LiZ2dQc+syaDl+37mleNXJwo09q0gTgXqLVILG4i6l218/Vh  
WzIUqRfYn3zIzarQPS+e2ZPB9fjiKecWor5W8YOWhP9/kuFvFJ9w0agvSb2P  
iO9K8pMrP1u52J0f8SXdhww7/qrub2kn/G9bYU0LIMPvfXRS5lMurvrlF10f  
Roact+Oz+58R/Z6ozzM4RAY7F+eH+JyLGT7Jl4tPkuHHg3KG5Asubp/VYotQ  
yJClj+k1/JKLyd/IWh4S9bEsill3p4fQV922W635ZBhf83lky+Lku93UByq  
yMBn6Jf5v+Hi8PCew24tZMAFF+K03nLxsKNn7ufXZBg9PI1CA1wUzBS1lP9G  
Btawr+irQS72uYVQvy82ACOfumdF7wn/M06Xj643gA+tChknPnLx2Kqy6luG  
BkCH00FOI1xsV4ucr/I0AL3yQRXFUYLfuogrSTGE3nlX7j4al+xtupvZUkno  
XVT4XMY4F6WaPF84vCT0Hr/XYf8kf2ePPdxQ9YfQe6BKv8QU0e973KWD0RC6  
VMvmdv3jYuZ9iqf7G0MwHBrd7z3LxfMt/IJWUSPIS9/Y7zpP6EPvuNFtshHE  
LOLftV7IQ5nq0lvFTCN4c7dTxWwRD92T1+2o6zACi0NiGcaLeZiu7lW6UMgY  
pN+djNNawsOnp21Zjw8bQwL39ojqMh4mfxDK23PdGlbv3kqL+dhIZevNPTZ  
GKqq95DWSPJwsbsF8264CXiz7L8LreGhWERzXvhpgAabpMB5eR7GBVm+uNAK  
sHW+vvOvAg8zUi/lya3eDtP7tG+MK/JwePq9muXd7ZBpuTqyR4WHdpdeN79j  
IAjNuL7uUuPhqrOi6+LrESlraHbt6jzkf89/c2QCwXidwNZGbr6W66muyPcw  
hbd/hj+WGPKwb3fkphLliva6sd6jwJiHis2SBwQPmMGNkj1N0cDDF6qqOpMI



ZnC6qz2Xa8bDxqriW8Uq5rDhWuXuU3Y83PnqW7SfsQVQg8Y7jjnwMMpXwXdL  
kgV8X7UFYnbwUM299sX9pxbQmJQpH+7Kw+e7HBcfi7CEPbvP9rru50H+4ZYt  
d6qsoE261sbRj4faJ/68KRK3BILbz9vW/jxsMkh63LvXGoQNwnnGQTyM+T4/  
/l7eBgolnN2UI3jI0u55LMS0hS/Na9v/HuNh1jXBCjbdAeIMTvh3xfMwumpX  
wpsRBxAu7ZsoPsnDLyY0fxpmjrCew5fw08PDb94nNj765QieQSu968/z0BVV  
h0P9naBhTuj9WT4P11cWix8Td4Edh4JjfC8Q5wpaTCUDF3j98f4i3UweprpL  
5xwJdoFfbQlbPmYTFcUcjpucgHVzD/7rQt4GGD0Nfytyvw9Mf+LLnFw463  
ouY3z7iBUokd9UMVD0vPzsNonhuUKxStqavm4Xsvi/k9zW7QtigUomp50D6h  
3yct7A4+x5qeWtUTfL+78g82ucPwmGLgugYeJvr0j3PN3WFB97vEzgc83Gu9  
zfvWSXdgWIN0UTOPuN8FXxy84A7yd7MKzji4bbI9VoWle6gl+vzWLuVh/uO  
3+BijLhDk3T1ziXtPjzTfjcr0080LhSZsfcdPFwol8n/J+0BkdHPxbldRPzB  
Gm9kTYn99L1Wzv5uHp7YTawqeHhAshdTy+olwf/bQVlSmAdItY43KvTwMKQn  
YpPGcQ+4DI7uv3t50GW+031FigeoV5R8fPqah2dWfbTszPCA2k1iRwv7eWju  
ijmhRR5geyFM5Mw7Hnr25vx8UuUBL5c+uuAzyMnfN41+TTV6wJ7Tm1S13xP1  
6LaEN+0e801HYq3YR6IeWlNRca88IGHvkOP7YR40NsZvzf/OA5a+xnd3PxHx  
nlq5/PqwB1zYcSma85mHSf6fG/TGPEC5cXbB/jEeanoZDbhOekAlyY9tOc7D  
awEG4tPfPcC0qEZJYZKHyoDwj22c8oDqS4uvbfvOwwNrTtzL++EBmjx3HZMp  
HvIOJ3hof/OAq7TLNQ6/eKgXFyDaRNhXSBw39ftD9K9ykJ4j4Z97z0jxvmke  
bj/5QL+xn4gv+rxz/AwPe+OawmSfe0Bi6ItX1DkeOsjmK5k+9IBpP8XdGQJ8  
1PbMf6hz2wMOuh0YLhLk40adRcXv8z3gk23t/jtCfLxdIqRiyfKA3Sj6s0WY  
j8l17y87nCD40/M80SPCR5XQocjxYA9w3Ja38JMYHw3zcFjB1gOaNk5Sfy/l  
o9MhCO9S9YCKFdQLMiv5+KV21V/2qDtsXfxqvbIkH3N1jtRSif0vZ3ZjIUma  
jw3aB3+9yHIH2aloDUtZPr697SAYcYjQ3+e6KvfVfOQ0WBsZWbrDokEx2LOG

j8ftcmdMpN3hxCuv5sNr+bjFLety6JAb7Gv69py1gY/Kr6IW/jvsBkM14Ju7  
kY+Njo9inchusLM8Zah8Ex/DDO4ZZv51BZvsTd86t/KxK5S+4fMhV7jHORQ3  
oMrH4rz30y9UXEEv5d78xDY+LnPoTaO+cwGLOB/x5dp87H+RG7JuuwtkRhVw  
FXSJeCp+eX8adQa]kB/y6np8XPRtNNY+zRkEXOmjqoZ8TJPatT24xAn6Ve/b  
pJjxUd896SPloA04K4p3Zljwsbc5iOacbQ9tq3y9iq0IvJlPP99uBzWLfoY8  
tuPj/d8fX183tAWtGdOvPQ58vLbgoPWOE8T8+s6I+bSDj2okXbv7j6xh3ejr  
f7+d+Rg7sPfwgII18N5tSVzxsxd6FwvXc4lWsOzlETFZDz6SXy2ITfptCefa  
GtOUvfgod69nf+0JS/jXuHy1ng8f+V4LHi+QtoRDd/xyLH35uIDKSF3ZaAGj  
N4o2e+wifj/zbgeIwQICcn5d370bj3vFsscVwxL7XZa5XkwwH8XPu4wLyljA  
DjazLjGYj2U2iRdcx82hmdJvwQ7hY/u62vP67eZgfFqlLXcvHz8NnHP3LjeH  
m7FH3SrC+XhmdyjX94I5qOxv6ru/j49rDoy+H0k0h8vBK4Oe7eej3nteT94B  
c1i103904AAf3VN/L9HzNQemc0n05EE+jllxZCwtzWGx9Z/f84f5y07/yTyq  
Zg7/A53JD4k=

"}],

{RGBColor[0.880722, 0.611041, 0.142051], AbsoluteThickness[1.6], Opacity[1.],  
LineBox[CompressedData["

1:e]wVIHk8FH0XxueWrWTtyi5JKltlLetjyVK2GWsMsg2hGPs2U7JGRYnh5lqy  
FpUUGWlxkZKESgpRKipblmyld94/fp/z+f51zu95zn02eQaRfNYRCIQ21vt/  
1Zl784PKR9An0POcc9Os9YczPtdMRAzpc/JCtDhZESefSIZWR0zq8+d3jHFL  
6+DFpwN2ZyN+64901je9czqMxdl247glHuhUnPMmjBzBuSPMz6UX+fHp4ZnM  
p/VkFDJ5r3L7C8lh/+CUZLQ7WqKZe96KbIHGsPEU0cMT3Cu8umERkqjrLZ34  
re0LCWdvwoDIVuBSzR8OVz8IDw1+KLoojScnWvGP4cewW1eljNNfBml/XInz  
GQGw/D2o8FpEDm0MJ+mwgCA4XE85l8q2E2Eqo4MJu4Lh7qoyrT2zE3ckfZ9x

5QaDej+l9kr7bpysdjYvOE5FNk3lQHCEEsLkF0uOLISgQGnon+2eyiiWEzRw  
swlF+VDKrz7LPVj/t5F9W2UoBgumhgsu7oXLm/JLbKQwTK0ZlbD7qyDKm5Cl  
lBqOWQdRu+FhFchsDzHd2x2OxRtTbEx7Vfh+P10qviUCBPc8SqCBGrQym9rH  
LkdA8OHU7pciGvhZX1nWnxmJLcKt76rPa6An+vp85dNliAflpSezaYISJc7x  
nBAF2a3GkwdmNOEreaIP/lHYFSlasJmyH7mhI54V+VFQejFlNTmwH0yHetGM  
51HQOJlXU9R+AFnxM/3cCtHQenPCI0ZXC9xsPv/VOUZDf4+xoN1tLYiOxXzc  
kBANs+GpUM5CbVjlabx79ToazvrGmicidJF+wu/idGAMlFPkC/b91MVGD4Hp  
xxdjsO4FP/tCuB7Gwh67ud6NQZXBUG9suD5eNTjUTv2KwanylgP6C/qw/Sz9  
bVUyFvKLdjbxWgAzauLzhG4s1vS07xo3Ajecmrnbx8Ri3POGv9wK4J5+TzaA  
EYve5G1SXFoG6Ja9VqB3OxYVXZxJz5gGUP01o80/Hgsbt1ckEtMQgTKWV3eY  
xkHrtCmH2rIhFPvCgt6T4yBb3sgUOmAE3vtLSz3UOCxPFkm/bTBCkq0ee3xe  
HD4J/P2qcckIVXnalabVcehST0nj32+MwbfynO4P4nCFdnzKvcEYi767RRkj  
cThbPFJssGQMUR3vU80zcYhos7Xfvv8gfsi68xAJNBzm0Wr6cvcgBISv69ZK  
0jCfz5F2/K4Jfpyyk1gk0vD+UbSu9aIJKHtcetpcaXjyaWJmr6YpxJZCHcWP  
0fCv4kvH+XpTePB+vu9HpyHVxoS776cp5vvdK31TaQgJYz64q2GGZyuDP1cu  
0GDSVLgjt4MpMJ6xkQJDXtHBN+Sf5rh6pLsQ5tqGsTYks/qaZhDV6Sz2f4O  
DdOHA+f+qjfHt7uy3FYtNLwLGi4fXTAH0S/opkkHda1ZJoc29U04s1Nj8/du  
GnIH9jen1h3C4ESkrceQDaf/VIX5LxzC19s125Y+0hC4fesuC/XDkHcSpXiP  
02AQwJ7BV3cYttKq0pRZGhQzogx/zB/GboP81T8/adhy+/tCr5oF1KcaZh1X  
afi20kPOuWOBZcODz83X0/FK6iB/1LwFRp+tjx3joOOBYUPLETVLVFAf9h/a  
SEclRSFS08wSzH6ZinAeOi6mFchL3rGE4P761GP8dMTdEHi/NmeJ+X82bt21  
mQ5Kb+KFEVUrIG66xX1biA5tsYClkttWYHacMVETo6P1Y/iM+bQVvuQqBPNI  
0GFRdWp8Wt4azRIR5Q8k6Xgdmj6STbEGtXw9r/lW0tx0cvq1r1jDJHii47o0

HWNsxd0fhqyxNiYxM7mNjoYv9p9aNtnghcTDmI3b6fh1yGUkR94GhgolFDZZ  
OgxuHh08ZmaDoT15NwdZnLyZ0q9DsUEAKZh4aQcdHZEBr/gSbdA9vgWKcnTw  
DgZ3fyy2QWaTl1MZi0mI6Kx7aAPPSwKhhJ105JTGPKkdssGqxoCfHosHuOJb  
XVZtIBgQK3iUxdLHkx8pixKhFCxsQmGxd09601+aRKhSah4TWVypfqHhlR0R  
QW0vrbaseDiv505FCBEf3PnzBlj9VNYu18RkEpGmPe4ey+Iiz+JqyxtERMq5  
u65ncePj8krpTiL+zfulF8aaf02+unTuKxFapd1lXaz/GWbcKnrMSUKaEkVl  
M4tT5urz83aQ8FjCLMmQpU+nY1NuoBEJvK6req4ydPA3NV/S9yBBZOXRshdL  
Tzvp9kzBkyRUUp1UbOLL0zk3sPPs5n4QixW9Fmiw/Bsd7UhsaSUhdV17MLkXH  
Nss3ien9JCwrp+pqZvl5Tehj3L6/bVH49FkTB8vvqeixKDYVW/B5WFAzRehQ  
fT8R9sbaFt6XqYYbheloKl8MpKXb4pvnE6Fu1v481+RxfbrODva3DGNrNtEh  
mC94Jf/aDtyyWvrtrH10IijYB+nZ4ZF9fngPFx3vn8hYCsXYwUisPr+ZjY6Z  
I/t1PX7YoXVA2UfsFw1qD3QPqPHZQ0rKR69vmYZoGSN1TiV7lAt8lUtdpGHd  
d0ul6372+DWSYveClZ/NcV6Sy8P24FAVbZpl5Uuj4PzvzC4HFKqnJLe+pKHq  
yqxa13cHcPoFcPL20CBd4RDIvcERPxL58oldNHDXSA0kGTni1ZhDffsTGkaa  
bzTENDjCtUxEL+w+DWmfu0K9rziBK1Hy/HQZ6z4p8n3TjHBGMfHvPpMwGpLv  
ZfS9l3QDtcXdi40blddv1lyf2L2QgGsrB7fGYcWgd0qCSQHf1aS586axSBMe  
TCq5548kr5tm414xUJ9jplKrTqC29l7dmfRo+Gw6861ZgYqSrW78c+1RCH6/  
NE7dHYpejoDjiVIBL3escmYPRzmk2XLpYhE3Audz8w3EUg97f5ljiMCT1MZ  
OX09UchUgNSOvnBs9L0ZKHQtBguN/00qKocjnY1bfPVqHIKuiTh30slgVmZz  
MrGllfOWDUFafaGwqtvNlqt1Cuuakozb9UJxc7FTrXl/PBLu+U3/WxiCtM6u  
yNUdp/H45d2W23whYI+flduwMwGbfSsnKqOo4NTkvuW3PRFNhwP2KnwNRsLJ  
05ZveZNQbj0aEu4bjMIKcQdJ3mQYFG1wOf4gCOqem6khv5LhUJd260/7CZCK  
CL6iX1Kgv2/U4trQcfA18j7NGk3FvhApP9JYIEzGY3W3dp+BC08WI48rEJI/

N0rRu9MwZ1VOfCwVgFj2jLfKneIlyomkFsMfthXUipn6s9DuevnhTeQxPNsV  
8SGp7hyMjPvPDZf64YHOWyXFkvPYZiLUIfrFF5qkffayZzNQ58934eZeX1SW  
2M9HGmcic1NE2VcqBSFjBqaUxkwIRLk7hrb5YJO4vo2e1gW0EpzO2/P7YJQR  
8LHg1gW0HNxyPyXQG/RsQc9KuYsI3+nY1drtha+nOxiXyy6CL304nFfjCxeY  
txyEjblQ/EX8KFeeJzaMXH0Wl5+F3BLtrsrFhJB0kVBOF7sE53+o6jz+HmiK  
fCAqk3kJU4R5zaJPR8HmRL13hS8bP58sLYY7HcWZeNsvVcnZmLJ16zx22x29  
CjVrrqvZEOZi7nT6zw3f2ySfL0fnYMHxedtoqysMrjbKSs3kQMN3g/fDYTIa  
CjmrlWZzIK1yh7N7gIy90XaquvM5YKuqVPvwhgyphCkD8IIoavfJyrN3k7FC  
lnH/h8CAhDs53vYRGbX8aXlbBBhIKEjp3lBMhmzUEV4+FQb4e+OCBj3JuHyi  
PFtKjQFUWoisuZEh6DMnoazBwGiCoJm0CcxkE0jkFSy0GovrUdSi2ZAwpNJul  
GzJgfgqvbMmljJzhXQmctgzwxjCFNXaQwdMXvlHYngEdgSM7j24jI7HzvwtY  
jgwoZnc0pUmSEclKfx10YcBW+V3UByEyrLly7yd4MTCzdl01m40MtjNDxlk+  
DEw0vw9qWUeGzin5ziu+DOQsWO+bXXOB/PHWd80BDAhIVRkRF11Q7CXg2XOc  
gaC04Evxcy4QcXb70hLEQLaDsn/ttAsybaqCZ6iseQt6Wke/u4DTdGnxTygD  
9jSzUqFxF/wPNK2T4Q==

"}],

{RGBColor[0.560181, 0.691569, 0.194885], AbsoluteThickness[1.6], Opacity[1.],  
LineBox[CompressedData["

1:eJwVz2k4lQkDxvEzFblbU5ZsWSNZx1K25yY0eokYkhMlpJ9yUmISrZjPec8  
PBprTrbRqLxTzbe0o0kUIpJRTThhRY0tUDOH1friv//X7eCv7hLn4b6LRaGc2  
9v9aLAX8iBCnETTaHoZ0UJflcM74rWk6jxA9nWyAmRQisV0h6gZ9hqqIYmm+  
vVNjPpQ9sf8g85ml6Ujt4iEu0f1m39FM+ioxxrB8K3jwEZFR33brm8BN8CpY  
513HM+JmZKTpqAw/Bif94sKK/yL6DBXu17UJ4mFR7JzR1RFicb7NNp4uiuW8  
as6PceNEljt3/DpLAg/Pcw6tzk0SpVyxGuFASTxFrPr72DnitqxfcKT1NkSH

jsXT/lwg/jzP1RuUkUKxjUcv12mR6B8UWyDmpBE8FcBnLL9CvN3nd7eyTRY8  
KXp5ntY6lbwsZnmWroBrKK4OW9sMeQ8/2itHJZxdsxOo8eaHNG9otIy1ExM7  
lI09eVuhZWIYIRCogqZHTlWi2mJwXB3S7pfRwNZaByHl1W1w/SU1K23LLmQe  
JNlf5UnB+4The/O5XajjLGga7JVBRHNqfXmbFvLSox+Ylcoh74LhvnC6DtQ+  
UYe5Ucoo0eH9pOqjC42/64M5ASqo5KV+eeGoB+cxtwFBH1UmlcwOl7D0sVTS  
ONB2Uh2za/s5fIGGcDoj6cFhakHy91mtPhkTvC58wNN3NIAHYWsaSreETxpD  
UvkHc+im7i4x+GyJtKfqEoviFtjULcH3KdoKbGHF4O52C9R68XrjogkcfJRj  
7GdphTUr83u2DYCwfgKvtABw9nru4sK1gXCIQUdzyX58LOJnhNyzh56s4C8z  
ww4w3xG0xPmvEyR6RBdzTh2BSUn2au5TV9jlyWreZXojpTHnxWsFL+xyFB6Z  
LvPH50ShrW/4fDEy4ntVtz0Iy9a9s/LcU5DS38YJuREOhvRQMqcxEOrHTN7v  
LYiC8QI3LaI2FDWHW49XedHhL5I+2aldAav2/wx0j8Qg/PXSuwitKLj6DrDO  
JsUhrF9dxJYvGsNXo6bTxi8gvttinDtAh4QKdXxg20U8TqPyXzyLQZeJ3ckB  
u0sQOn0zePvPsSg2/m2Y7X4ZGVuE5VZq4pEqoVevEJeEHRXOiVfKEiAileFo  
mH0FTne0thSYXcS0rEpCT0oybi52GrXsvYQ1U6VI6cwUMDqfnltRvwwJJ/C7  
xaSC79K8huCuJOyts/3oEJ4GAVPh2wGqV7DqP5oycDwdSYmXHQfFkiHB+EK1  
6jNQWiXnqiCWAmMz/+2hEhkw9vkmIvJLCgJaOG71LzPgokg7LTuRCqvq0iPB  
wkyIN4g9Zo+loZZvuMDcPwv27+IslXrSUTA/kS8knw2Fz0KKCT0M105srvz8  
KhtxfDmDup0Z4PAHmH7PysGRqoiqubuZcOsbUsqSy0WHJn00+U4WNtv0zitH  
5uK+xaDOHk42+AobnwT/kQtTF4Njapk56HeIThoRYqKac+zjOdtcGC3fC9J2  
ZyLyrfWBUw256PPZkzlfyoSIHOFsZcbEStz+CftJjsaooL9LbjNR52fle1GH  
hYQ8SZ9qDRYW7Jsmg0NY+OfyE6qwgOWZmYbWolssMLm3XaXl2ZjlRHh5zrAg  
OFLTEV/ExvaCJsWdOmzYpsrrZuwgcd6zfpOvZ9hoOndfViWXhJ7mtanoMja2  
/BDRWC6eh299Fnkrg2ykXzoyUZuSh2jtA4M0MRK92rfWTqzkIczy5x9jCBJT

rQpd/57Ph4u+a3psFAnrmgY1xbl8jPpXMBLLSfxWKnBDZz4fHUEicOKQ0M8/  
+q3lx3zYFR8YIL90QjFp1tpzKR+mTxzucStlLHuqeP9Eo2BHvFOeryZRL8G4  
KvU1BV+98V9P3CShFuMuJm5IoWm+cFqpiURhaGWeohEFxU+zqlMblvRfkNc1  
oZB5lpe420yC5pKl7WhG4WVVI+r3v5Pgabd8l2FDwUOtqIz+gET+sGaSwBEK  
GiKtoY/aSYi+iBaSPkZB5+gf0zmPSVzpfMDUcKNw8oPdIfcnJCK5nmV2xylU  
6a+3THWQcGLnNif5UnjlzvIS7ybRms6zZftTkFr/7qu/NmxxcXdn+WkKXs+r  
0sp6S0wOefiyJYiC2UKwnUEviWu+X/s8C6EwWvcy9t8Ny3h4/TMStvEvYZ1s  
6SOR61wbPhdB4bncMDv9OQmBA0uL61EUDIkL5w73k/gfISYKvw==  
"]]]]},

AspectRatio->0.6180339887498948,

Axes->{True, True},

AxesLabel->{None, None},

AxesOrigin->{0, 0},

DisplayFunction->Identity,

Frame->{{False, False}, {False, False}},

FrameLabel->{{None, None}, {None, None}},

FrameTicks->{{Automatic, Automatic}, {Automatic, Automatic}},

GridLines->{None, None},

GridLinesStyle->Directive[GrayLevel[0.5, 0.4]],

Method->{},

PlotRange->{{0, 1649.98775}, {0, 1453.082802}},

PlotRangeClipping->True,

PlotRangePadding->{{Scaled[0.02], Scaled[0.02]}, {Scaled[0.02], Scaled[0.05]}},

Ticks->{Automatic, Automatic}] \) \!\(\\*

GraphicsBox[{{},

{RGBColor[0.368417, 0.506779, 0.709798], PointSize[0.6], AbsoluteThickness[1.6],  
EdgeForm[{GrayLevel[0], Opacity[0.3]}]},

{RGBColor[0.368417, 0.506779, 0.709798], PointSize[0.6], AbsoluteThickness[1.6],  
EdgeForm[{GrayLevel[0], Opacity[0.3]}]}, PointBox[NCache[{Scaled[{Rational[1, 2],  
Rational[1, 2]}]}, {Scaled[{0.5, 0.5}]}]}]}],

AspectRatio->Full,

BaselinePosition->(Scaled[0.1] -> Baseline),

ImagePadding->Automatic,

ImageSize->{10, 10},

PlotRangePadding->None] \) blood

\!\(\\*

GraphicsBox[{{},

{RGBColor[0.880722, 0.611041, 0.142051], PointSize[0.6], AbsoluteThickness[1.6],  
EdgeForm[{GrayLevel[0], Opacity[0.3]}]},

{RGBColor[0.880722, 0.611041, 0.142051], PointSize[0.6], AbsoluteThickness[1.6],  
EdgeForm[{GrayLevel[0], Opacity[0.3]}]}, PointBox[NCache[{Scaled[{Rational[1, 2],  
Rational[1, 2]}]}, {Scaled[{0.5, 0.5}]}]}]}],

AspectRatio->Full,

BaselinePosition->(Scaled[0.1] -> Baseline),

ImagePadding->Automatic,

ImageSize->{10, 10},

PlotRangePadding->None] \) liver

\!\(\\*

GraphicsBox[{{},



```
{RGBColor[0.560181, 0.691569, 0.194885], PointSize[0.6], AbsoluteThickness[1.6],  
EdgeForm[{GrayLevel[0], Opacity[0.3]}],
```

```
{RGBColor[0.560181, 0.691569, 0.194885], PointSize[0.6], AbsoluteThickness[1.6],  
EdgeForm[{GrayLevel[0], Opacity[0.3]}], PointBox[NCache[{Scaled[{Rational[1, 2],  
Rational[1, 2]}], {Scaled[{0.5, 0.5}]}]}]}],
```

```
AspectRatio->Full,
```

```
BaselinePosition->(Scaled[0.1] -> Baseline),
```

```
ImagePadding->Automatic,
```

```
ImageSize->{10, 10},
```

```
PlotRangePadding->None]\)      gi
```

```
(*-----  
-----next mouse*)
```

```
vn=readTac["C:\\Users\\exx\\Downloads\\TbD120M4, Liver 2.754375, GI 0.9345,  
ID 3959.csv"];
```

```
Lv=2.754375;
```

```
Gv=0.9345;
```

```
id=3959;
```

```
vn[[1]][[1]]
```

```
{{10,239.655},{30,356.016},{50,122.179},{70,70.8736},{90,57.3355},{110,48.0636},  
{130,41.5844},{150,36.9538},{170,36.0258},{190,33.1094},{210,30.5227},{230,29.2  
506},{250,29.0575},{270,25.9055},{290,24.9644},{330,23.3164},{390,20.6013},{45  
0,18.1498},{510,15.5025},{570,13.2233},{750,10.96},{1050,9.9477},{1350,8.25438}  
,{1650.04,6.83194}}
```

```
model= mouseModel[Lv,Gv,id,27]
```

```
ParametricFunction[!\(\(\*
```

```
GraphicsBox[RasterBox[{{179, 179, 179, 179, 179, 179, 179, 179, 179, 179, 179,  
179}, {179, 180, 180, 180, 179, 179, 179, 179, 179, 179, 179, 179}, {179, 179, 180,  
179, 179, 248, 248, 178, 179, 179, 179, 179}, {179, 179, 180, 179, 179, 253, 248,  
179, 179, 179, 179, 179}, {179, 179, 179, 179, 179, 248, 248, 179, 179, 179, 179,  
179}, {179, 179, 248, 248, 248, 248, 248, 248, 248, 179, 179}, {179, 179, 248,  
248, 248, 248, 248, 248, 248, 179, 179}, {179, 179, 179, 179, 179, 248, 248,  
179, 179, 179, 179, 179}, {179, 180, 179, 179, 179, 252, 248, 179, 178, 179, 180,  
179}, {179, 180, 180, 179, 179, 248, 248, 179, 180, 180, 180, 179}, {179, 179, 179,  
179, 179, 179, 179, 179, 179, 179, 179, 179}, {179, 179, 179, 179, 179, 179, 179,  
179, 179, 179, 179, 179}}, {{0, 0}, {12, 12}}, {0, 255},
```

```
ColorFunction->GrayLevel],
```

```
BaselinePosition->Bottom,
```

```
ImageSize->{12, 12},
```

```
PlotRange->{{0, 12}, {0, 12}}]\) \(\(\*
```

```
GraphicsBox[{{}, {}],
```

```
{GrayLevel[0.55], AbsoluteThickness[1.5], Opacity[1.],  
LineBox[{{9.09090909090909*^-8, 9.090909090884856*^-8},  
{0.0874367476365131, 0.08197166587636243}, {0.18222810297558026`,  
0.1358255024317191}, {0.27073779576926765`, 0.13315455086535802`},  
{0.3575112797365835, 0.08143316377978886}, {0.4516394623155443, -  
0.007347854733426912}, {0.5394859823491253, -0.08816932746972758},  
{0.6346872009943513, -0.13787329990112937`}, {0.7281522108132057, -  
0.12816574147938434`}, {0.8153355580866803, -0.07001063326902106},  
{0.9098736039718, 0.02121659675083076}, {0.9999999090909091,  
0.10024804094746914`}}}],
```

```
{GrayLevel[0.55], AbsoluteThickness[1.5], Opacity[1.],  
LineBox[{{9.09090909090909*^-8, 9.090909090880112*^-8},  
{0.0874367476365131, 0.08090369567458766}, {0.18222810297558026`,  
0.12746559200130417}, {0.27073779576926765`, 0.1116266937044405},
```

{0.3575112797365835, 0.046963725126600256`}, {0.4516394623155443, -0.04509050859182233}, {0.5394859823491253, -0.11115559892361665`}, {0.6346872009943513, -0.12642564594664163`}, {0.7281522108132057, -0.07740196037964171}, {0.8153355580866803, 0.004179083230780074}, {0.9098736039718, 0.08937493944143977}, {0.9999999090909091, 0.12834702174618903`}}},

{GrayLevel[0.55], AbsoluteThickness[1.5], Opacity[1.], LineBox[{{9.09090909090909\*^-8, 9.090909090875369\*^-8}, {0.0874367476365131, 0.07984396759533968}, {0.18222810297558026`, 0.11939549826670079`}, {0.27073779576926765`, 0.09184904274707059}, {0.3575112797365835, 0.017913117173780694`}, {0.4516394623155443, -0.07109962300031061}, {0.5394859823491253, -0.11717052830989395`}, {0.6346872009943513, -0.09879571259704382}, {0.7281522108132057, -0.022693471356141894`}, {0.8153355580866803, 0.06128703302641453}, {0.9098736039718, 0.11605625481609519`}, {0.9999999090909091, 0.10415981267620744`}}}],

{GrayLevel[0.55], AbsoluteThickness[1.5], Opacity[1.], LineBox[{{9.09090909090909\*^-8, 9.090909090870287\*^-8}, {0.0874367476365131, 0.07879243663407876}, {0.18222810297558026`, 0.1116081822210312}, {0.27073779576926765`, 0.07372482040530459}, {0.3575112797365835, -0.006267252216927747}, {0.4516394623155443, -0.08743897872291118}, {0.5394859823491253, -0.11109134853087661`}, {0.6346872009943513, -0.06371549528296311}, {0.7281522108132057, 0.02544576624054603}, {0.8153355580866803, 0.09464282937855747}, {0.9098736039718, 0.10731931496853601`}, {0.9999999090909091, 0.0516787429232188}}}],

{GrayLevel[0.55], AbsoluteThickness[1.5], Opacity[1.], LineBox[{{9.09090909090909\*^-8, 9.090909090865543\*^-8}, {0.0874367476365131, 0.07774905743802465}, {0.18222810297558026`, 0.10409673959866513`}, {0.27073779576926765`, 0.05716133039337165}, {0.3575112797365835, -0.026084496726167965`}, {0.4516394623155443, -0.09591154799603378}, {0.5394859823491253, -0.09685594593277226}, {0.6346872009943513, -0.02730376120671303}, {0.7281522108132057, 0.061646715198529656`}, {0.8153355580866803, 0.1046634148537508}, {0.9098736039718, 0.07509702498429204}, {0.9999999090909091, -0.006536873471333553}}}],

{GrayLevel[0.55], AbsoluteThickness[1.5], Opacity[1.], LineBox[{{9.09090909090909\*^-8, 9.0909090908608\*^-8}, {0.0874367476365131, 0.07671378556951527}, {0.18222810297558026`, 0.09685439581479163}, {0.27073779576926765`, 0.042069810325321415`}, {0.3575112797365835, -0.042006785469922474`}, {0.4516394623155443, -0.09808544986431629}, {0.5394859823491253, -0.07760167026270944},

{0.6346872009943513, 0.0063643674428021085`}, {0.7281522108132057, 0.08405712128907425}, {0.8153355580866803, 0.09555213349985489}, {0.9098736039718, 0.03202960165577907}, {0.9999999090909091, -0.054402034659985464`}}}],

AspectRatio->1,

Axes->{False, False},

AxesLabel->{None, None},

AxesOrigin->{0, 0},

Background->GrayLevel[0.93],

BaseStyle->{FontFamily -> "Arial"},

DisplayFunction->Identity,

Frame->{{True, True}, {True, True}},

FrameLabel->{{None, None}, {None, None}},

FrameStyle->Directive[Thickness[Tiny], GrayLevel[0.7]],

FrameTicks->{{None, None}, {None, None}},

GridLines->{None, None},

GridLinesStyle->Directive[GrayLevel[0.5, 0.4]],

ImageSize->{Automatic, 28.4375},

LabelStyle->{FontFamily -> "Arial"},

Method->{"ScalingFunctions" -> None},

PlotRange->{All, All},

PlotRangeClipping->True,

PlotRangePadding->{Automatic, Automatic},

Ticks->{Automatic, Automatic}] \) Expression: {Bl,Li,G}

Parameters: {k1,k2,k3,k4,k5,k6}

]

```
Manipulate[Show[ListPlot[vn[[1]],PlotRange->Full,PlotLegends-  
>{"blood","liver","gi"}],Plot[Through[model[k1,k2,k3,k4,k5,k6][t]],{t,0,1500},PlotRa  
nge->Full,PlotLegends-  
>{"Blood","Liver","Gi"}]],{k1,0.001,0.2},{k2,0.0001,0.1},{k3,1.*^-  
6,0.01},{k4,0.001,0.2},{k5,0.0001,0.01},{k6,0.0001,0.01}]
```

```
Manipulate[Show[ListPlot[vn[[1]], PlotRange -> Full,
```

```
PlotLegends -> {"blood", "liver", "gi"}],
```

```
Plot[Through[model[k1, k2, k3, k4, k5, k6][t]], {t, 0, 1500},
```

```
PlotRange -> Full, PlotLegends -> {"Blood", "Liver", "Gi"}]],
```

```
{{k1, 0.0032}, 0.001, 0.2}, {k2, 0.0001, 0.1},
```

```
{{k3, 0.00318}, 1.*^-6, 0.01}, {k4, 0.001, 0.2},
```

```
{{k5, 0.008790000000000001}, 0.0001, 0.01}, {k6, 0.0001, 0.01}]
```

Part::partd: Part specification vn[[1]] is longer than depth of object. >>

ListPlot::lpn: vn[[1]] is not a list of numbers or pairs of numbers. >>

ListPlot::lpn: vn[[1]] is not a list of numbers or pairs of numbers. >>

ListPlot::lpn: vn[[1]] is not a list of numbers or pairs of numbers. >>

General::stop: Further output of ListPlot::lpn will be suppressed during this calculation. >>

Show::gcomb: Could not combine the graphics objects in

```
Show[ListPlot[vn[[1]],PlotRange->Full,PlotLegends->{blood,liver,gi}],\!\(\*
```

```
GraphicsBox[{}],
```

```
AspectRatio->0.6180339887498948,
```

```

Axes->{True, True},

AxesLabel->{None, None},

AxesOrigin->{0, 0},

DisplayFunction->Identity,

Frame->{{False, False}, {False, False}},

FrameLabel->{{None, None}, {None, None}},

FrameTicks->{{Automatic, Automatic}, {Automatic, Automatic}},

GridLines->{None, None},

GridLinesStyle->Directive[GrayLevel[0.5, 0.4]],

Method->{"DefaultBoundaryStyle" -> Automatic, "ScalingFunctions" -> None},

PlotRange->{{0, 1500}, {0., 0.}},

PlotRangeClipping->True,

PlotRangePadding->{{Scaled[0.02], Scaled[0.02]}, {Scaled[0.05], Scaled[0.05]}},

Ticks->{Automatic, Automatic}\]. >>

Clear[newmodel]

newmodel[k1_,k2_,k3_,k4_,k5_,k6_][i_,t_]:=Through[model[k1,k2,k3,k4,k5,k6][t],List
][[i]]/;And@@NumericQ/@{k1,k2,k3,k4,k5,k6,i,t};

fit2=NonlinearModelFit[vn[[2]],{newmodel[k1,k2,k3,k4,k5,k6][i,t],{k1>=0},{k2>0},{
k3>=0},{k4>=0},{k5>=0},{k6>=0}},{k1,0.003`},{k2,0.0001`},{k3,0.0034`},{k4,0.001`
},{k5,0.0088`},{k6,0.0001}},{i,t]}

NonlinearModelFit::eit: The algorithm does not converge to the tolerance of
4.806217383937354`^-6 in 500 iterations. The best estimated solution, with
feasibility residual, KKT residual, or complementary residual of {1.134*10^-
10,0.00164853,4.15579*10^-11}, is returned. >>

FittedModel[newmodel[0.0409256,3.47895*10^-
12,<<22>>,<<23>>,0.0743959,0.0000774698][i,t]]

```

```
{fit2["AdjustedRSquared"],fit2["AIC"]}
```

FittedModel::constr: The property values {AIC} assume an unconstrained model. The results for these properties may not be valid, particularly if the fitted parameters are near a constraint boundary. >>

```
{0.942847,887.563}
```

```
fit2["ParameterTable"]
```

FittedModel::constr: The property values {ParameterTable} assume an unconstrained model. The results for these properties may not be valid, particularly if the fitted parameters are near a constraint boundary. >>

|    | Estimate                  | Standard Error | t-Statistic              | P-Value                   |
|----|---------------------------|----------------|--------------------------|---------------------------|
| k1 | 0.0409256                 | 0.00808169     | 5.06399                  | 3.5274*10 <sup>-6</sup>   |
| k2 | 3.47895*10 <sup>-12</sup> | 0.000737493    | 4.71727*10 <sup>-9</sup> | 1                         |
| k3 | 0.00180423                | 0.000248675    | 7.25537                  | 5.68301*10 <sup>-10</sup> |
| k4 | 0.000178709               | 0.00147728     | 0.120972                 | 0.904081                  |
| k5 | 0.0743959                 | 0.0144514      | 5.14801                  | 2.56583*10 <sup>-6</sup>  |
| k6 | 0.0000774698              | 0.000206906    | 0.37442                  | 0.709292                  |

```
Show[ListPlot[vn[[1]],PlotRange->Full,PlotLegends->{"blood","liver","gi"}],Plot[{fit2[1,t],fit2[2,t],fit2[3,t]},{t,0,1501},PlotRange->Full]
```

```
]
```

```
\!\(\*
```

```
GraphicsBox[{{}, {}],
```

```
{RGBColor[0.368417, 0.506779, 0.709798], PointSize[0.016666666666666666`], AbsoluteThickness[1.6], PointBox[CompressedData["
```

```
1:eJxTTMoPSmViYGCQAGIQDQEqDrobjaR+fsl1gPDtHBp0ucSchMqgfE8Hu+kr
```

PQu64yD8hkCHm08H97/cHgjlhznYGm0M+bTKB8qPdsgujJ6qzOEB4TskOHD2  
fOU9c8oFwj+Q50AsfkdDtMoJKp/q8Grl7DW+zFD+gXSHX9+03/vf6wCVz3LY  
GVxTcrHVDiqf4/DnyuMWLQdbqHy+wytXNpltfD+gwKHafUdGeefW0L4CkUO  
brYnbt//ZgHhLyhxiH/lVcEQaA7hJ1Q4zElm8/440wSqvsab42xOfKSaEdS8  
eoc3W+IWejLqQ/gXGh1UPZ/r+RdpQfgF7Q5f7/+f1/VaFcLPmOBQFPZQyfKp  
MoQvMdXh05t4L7smBYddt7r+qp6Y6aAisz/+RbC0AwB77HQj

"}],

{RGBColor[0.880722, 0.611041, 0.142051], PointSize[0.016666666666666666`],  
AbsoluteThickness[1.6], PointBox[CompressedData["

1:eJxTTMoPSmViYGCQAGIQDQEqDoIJ7pdU8pwcIHw7B5+1QVfl3ZKgfE+HuNA1  
F8zWFUD4DYE0ybNDTKY9K4Hywx3bi1L1iUQ/nRDs1z5rjJe1VA+A4JDvGm  
D2wvclRC+AeSHKIWLt7wrBXKd0h10HtEMuNwCEw+3aFz3YZW1Z8w/Vk004XU  
DNduh/IP5Dgs5nYVnVkMk893YHt6fKW7BJT/oMBhydYlh/DNUPcoFDnYOwTN  
jzeC8heU0Jxau6QgQrsMwk+ocNAPiczXT4P6R6HGQUa9tVK/pAhqXr3D1dsb  
ts/bB/X/hUaHZ/NSEu3W50H4Be0062umPWfMyYLwMyY4tKzr0516NB3Cl5jq  
sGLZScM6i2SHXbe6/qqemOnAZP/l3c0JiQ4AG9dzaA==

"}],

{RGBColor[0.560181, 0.691569, 0.194885], PointSize[0.016666666666666666`],  
AbsoluteThickness[1.6], PointBox[CompressedData["

1:eJxTTMoPSmViYGCQAGIQDQEqDm8e7Na4GmzkaOHbOfAqcbiJOMZD+Z40e/cK  
iD+9nwjhNwQ6KCjmxzlWJEH5YQ7CrR/1P1LhvKjHUQs6nx3B6ZB+A4JDitX  
HlD5sCsLwj+Q5HAn+aWzuFc+VD7V4cJERteJE4ug8ukOax5sV1RTLoPKZzn8  
i3VpiHhUAZXPcag1ebZ/on4NVD7fYc+EzaF6s+oh/AcFDp8fXylWD2+E8BWK  
HF5uX888fVYThL+gxOHFu5YVd560QvgJFQ56vJuk7yR0QdXXOLjntmvz2PVC



zat3ej/6Zuph8X4I/0Kjg6mTfTC/C5Rf005waD+HVLLGRAg/Y4KDtF6Rf3jL

VAhfYqpDWfCpbNcj0x123er6q3pipsPXb88XHdSa4AAAmrx2NA==

"[]}, {}, {}, {}, {}

{RGBColor[0.368417, 0.506779, 0.709798], AbsoluteThickness[1.6], Opacity[1.],  
LineBox[CompressedData["

1:eJwV1nc0Ff4bB3DJ SIRURvYqu+zMz2OPzHttkhAys7NK2SMz90YiJSN0L8qK

JEL2uJQiEiFfW4Tk5/fX57zOeZ/nr+c8nzevow/mOjkZGdmpI2Rk/3+VNz6t

+TKQIX1NyZtRXXiYTJ0l/hc0gdw0/13jS8XBnU50//KgJYTRDzo445wF/TMK

ZslB+yhiumu8UCkTkqo6iKfcyaEw7/xZonIGEPz85L+zUsGX9IWGFf102F7v

0AwPOgH737CpL1hT4b51/WxhBiNsZyjF+oXfh/x6+lJadyaI989Yz/idBK0h

9RfGWJmBP8aXIpI/AUbG6DfQKgsMMs65qI3GwZyCc01RBxs0Sf5z18qJBdpd

epWAIE5gza7+moCJBg4bZ7KvhtywKdfQxa8VBSwT49+fZPBaiuHWSKXWPRBW

kXp07c4Hy1KMd3q8lkFqaZzqjTk/mJ3RkaQWugNKj+PcvNUE4EHbyBBFUGQY

7o+LjrCeA/7vFLJ0aaFgURF3P57iPKSeGR9cuhACV69IrSitngcRZ0mgmw4G

36a4qqcdwhBwfTMLhQRCqJfUaYtqEZCpfZubbRcAUZwTgTT5omDrMHDupZE/

ZEVIKdwMEgcHgb9GjHa+kCc+kCpV KAGx1R8OVgNvQtFE3N9Rwwwuwm5GiGi7v

A+N5y5N5GRchwbiZyfCkJOxttabdOiYJtHzOO+ix08waZathbktCpP9Hl0DI

G7D8T+MZpbsUBPLyTjUSXWDDgs1sclIKtODI/u+o67D9cpmi3lwaHJpUbN+7

OAPZ1WwXTzUZkGiiJyzdASKWm8W7VoZSP3JktDifA1oGDQ7ucVlIdX4vJbM

bQdgal4WHmaVA/cF9vaMkivAzNL2pTxFDpL7yvMCu02A3Sc7KZZCHh537N58

+cIGBLg1lxRW5eG0/Rfek7uWIBTMlnfK5RJYUqtqwTdagHj/stHS10sQp3ZL

eDHFH0TuZBOfdCgA7+p9WSVHLCh+8r4WqqII7ZKPJLHXMIaAuaDKZVSvCiwTe

3RovU9CdXPanzleCBIyZtLOIMRjItwl8P60M7qwifuR1hmCamj3SkKgMy84p

6oISBmCDNOW9g1RgkbYg+L6FHkjEieRjBqlAFvNasNmiDpD3M1L+DIQFQRMJ

m4AH2lBmPzEUfoigP7bBCnFrQmRRqwL6jYBoNhY69E8dRLbNT04qAjR9XRtl  
WVaDf6pKtZoNAEEc2xUTh7l5x5fu53YBGBODHpNEVWEolpfrmKlAMdy4W+cX  
pgzFfdQx3fVqELE2Xk/mqAAZ66GXKnBUoJan0kF/Sx7CmZcXUxTU4W3rx4Gt  
PDkwsSdhMPXqYC0sPLUsJAOK93SoZHbU4cSRZwcCx6RBoKih/oyCBvBCKXfc  
tiTsLD3hGavTAKY+tkStoxdh5uRpUsMfDWBcvqjxS0kC+mTj4nIvaQJdwBsy  
siQxeBrhtXy1ThOuYY1x6TeFIblgqkDtjyYlqDpSe1MIQdAHRdn/JS3I+WPU  
+LL8HFw+odj4s1YLjvyjl/klKwBykhU+ndta4P+hrqjND/wmPPwv5DXhtXc  
m3LjR/lgm5cq0atWG6SeNRTSMPDat3chKsbb2nBsRVjvG8MFnTP/rV6U14HQ  
OJSTUcABj8WGLTdrdOBouU4/NpYN4k20aUe3dECqNdW+n40V/ALq39bK6YJl  
+cN7TS3MoN2YLxhWowlL/Gk0V/VPw8UppjG7LV2458ja8VfoFJyliE1WldMD  
vpE1+SEWJli57LlxpEYPLtnt8GXzMcIXn8miH7/1AML/MjSE0ENbJsbmg6w+  
yNMyaB/vpIOHxy+1xL/Wh5DFCCeNchq4d1AW4P5bH6YWv+4loGPgyc8tZCB7  
GUL8yq005qhAzYMyleH1ZTDSm/yY50MBYqm31Nc2L8NJPmlWHq0jwFy9+Htl  
xgB+1PtaTCuTw6/dQTvcKwMYeYLk7+uQAYlLi/HWpgG0xWBxuNZ/6K16Xau1  
jCGUfAr5MXVyH2Uk5olwvjIEiT/35i9s7aDwlye//dswhCs/W5juJ/xBlkPR  
6VPSRvCm+N9ZN8ltpHTW48+zaiOYvf8xhLFhE7VNB67qrRiBKXbKzb1sAxmU  
Rc6viBhDb/qRePKydWSvjPus9NQYklkZn+8OrqI5ioKB7xPGENTeqL2xsolQ  
fprPtNKZgGv5p/wFzDJSIziM39A1gdRczpQtq0Uue8rls7KLCSwTKtY/7Syg  
rmAPEk00CcDVOXWlinmEgaCe180m4LCNjN7q/ES4wrDO+AkTkP5PI4NBfBZ9  
PXa3zXbPBIr7ne1MeWeQ82BS4xF5U7jhV1QVJT2NSmTT60hmpoAbQdlUjt/R  
UjbuVbGfKWze6BJluzWFghwLyg1fmsjW8YxgyugEamgvKuHpMYWGuZs3kt3G  
0T+R8sKNBVPonc2q2TzxFcVt1ORmC2LAbn9wmiz1M+qxbHzoqYGBqDS2a81u  
nxBjY8sDdHiHxMvXuYQwo+hhdE/ybC4GXl6vNZWakND4/GB8XQMG3KwG0zWd

hxGv4afopM8Y6P56qjs8egi9ODMdLnkaC25iP7SE5wfQcsjcLQopLMzH7FW5  
igwg6W//BXwyxgJGqZeYv9SHGou2PSOSsFA5yJvKadWDyGj33UxKscDSosPc  
fb4bafqQX+fvwMK6yRuqaou1Ct/4spHcjMgT8+9NP27AzHIMlnn8pjBEXWK  
YGnyDmRBxmruo2oGKQ/TJFrY29G3Tj7DM6Fm0NYVKfzBvw3xiQvpzePNIDBB  
ameX2Ipc08W13rw2gy5L2Vtf/rxHq9aXVK6tmUFq+oydTVELknmroiDDYA7f  
qW+47BxvQSF8GrLU4uZwzs+6WOLW00S+aChe4WYOORHG2dIjb5G2MVY4MtYc  
ThfXf9+daEKJ1VaC2EjzWAison242YhOhTtx7kyaA+OGjU+y7htkNeXG1rNv  
Dkmh8CMhughlanqfyWe3gHjwCiN016OpEv+TfgoWoNG0GerFWY8EToSc0LK0  
ACFJdWPZkDrk5nubhjXQAnib2DxCv9WiipEoysUMC4hI2CR7Z1CL5PJS9tP6  
LMAv0A0XpF6Dyp6uy/QtWoDTUjkzpvS14im28KSlSRYj89mIraVea6s4Znu  
OUtoq7BmLVx7hWiJXF9jNCyBbcUh0TnlFYp8dY+p1cESkDmhm1XyFdqq+6IH  
dtsSeNjIPALHqtFUy8u60DpL2PuW5PFXoRqZtzOt1o5YQmsWS/OjtSrU1RV0  
/ve6JTSN9Ab3V1Qdfxf7KUYrYDdZXbU2rsKvR5WxfmIWwHRJvP6gVQVEvn8  
tLdc3woEFPM5kvcq0ZNxKspfrlagYHbCp7ejEiXO9vk7Pz3Mi5LNFrlXooMF  
qbKCZivwuJBf0AuVKGAZN/1t3Ap+SzpV85+tRL/Wd9k4dq0g3KdvSH6LiK5u  
25tas1hDycwN7F8SEZH23sfjZKzhNhuliHENEemTnX83bGoNx3oEAuhziKiZ  
Immb0ccajq9fKmGNJCIZmhUJo2RrqH1VPWnsRkSlj7AuSaXWwPLQ0+Ihhoi4  
mGofd7Zbw/ewOKNRVSJ6wMw+QjljDWdvDr9YFiMiGvY7dBpHb0Ajh2fBRw4i  
us39QyOSywbG/X6EmdAT0Sa/TliTkg08iVmM8jxCRDeEyqp2rWygh5S0yvAf  
AX0TY/gIH2QDmAusWdyfCQgr6c8bmHk4z2+rbbqdgDplP1lVEW3AlRprLVNH  
QKqKSmkrvTbwt4C8eK2MgKpV8zvEFm0gmNT4c6+AgIQ0jh7cOGYLNQVrz2Vy  
CChPx1WuWNAWzr1Tx0U8IKBTBt1eM+q2cITXX+pNGgHFm1x4zutgC3ly0sGk  
FALaN8sct4+wBeUl/mDiof2st0/l5tgCk5dwltxhfv6K7eWxWltgJDLummQS

0BXH5nvMI7YwmL+vuIignoCEX/gbsui0wSxWtrD4mIF2PuLU0Bju11hdXNHpO  
QE0+i0J9YnYwEbb2aq2CgKQCjB1o9e1Aku33i65aAiq+VY3XdbWDOREu1873  
BMQRwdIfE20HNR7XJr/0EVDG3TCq1gI7WMqzldz8SkDUUsZMqZM1200d3bJ7q  
FwGFJ2oEqozbQV6WUwrlDgGtpxSXh+7YQaxcsK8vBRGN433Yf0tfAVGXYSnY  
M0RkmjuMkTK9AoK6TAUFXETU/kQ+0cf7Cqzxx1QwCxFRZenBn4XDHqkQW/Vo  
V4mIYt+kjn7jtlDvHVueMq5EtLIXHIZTsYeSA739PH8islJ24DG6Yg/j4QFc  
hof7JdJ00b0p1x5utnk1OB3uX//bwf1H7FdhxECmhW2QiOi+J2SU0zlABU31  
grB2JbKY6a6/cfwapJ8VL4hTq0K/fhkfm6F0gvpp1wt2l1+hXbWhZY56F6Ci  
WCV0HK1DiSzmC/euMnt6hHzvOE3SHajPt63zPuwx7+2dLJuRtftpEn61iPrC  
7Y7SskSFFnTz2595X2F/MBB0tHDtf498RgTpNckDQfS29FS6TBsK71eerf8U  
BJ1SU9a+dz6gj/F430jgLVj9cHebaqgdHXcleJ55EQqheZntQ3sdKImCln2v  
NByqjy01rot+RGefm9yJfnIbFkIONES0u5DRa2GKh4qRcD69xMpJqRsRtntk  
Wi7dBfk7P2qC5HtQYk9f8J7gPWic03iycboXUd5dP0dzPgp+bA61v9vqRdT  
tjVu/NFApef2fbK9D0XduWc4Rh8DFq8/GWRF9KP8YnYLTvpYqB9m+rjKPoBk  
HU/5+v2NBc6wh3NIXgMIw0XmyvYzDhbMZZnP1w8ghgb6j5k/4oEwaubFRTWI  
tOfDVLgHEoDeMmkpQ28QcW4d57o9kAj0XCcZL6QMoJDK1DGJniToYeDuUukd  
RNhi3+LVmmTwl+575kUxhLqFgr7HvL4PqxyOdxOUh9Bb5TFxsWcpsLnG8hPv  
NYTkMZLmAsmpgExETZpyhlDJM/PNYM006GhmrHrUOYT85tR0XBrSoNpN00Xp  
6hCiY0cmqorpULgRSCbGNox+4D2m8yrTIVlIjRCeRjdzmJyLDmXAYJieVST  
dsNo4V4X/tHzDMhw1G19HDGM0usrLVg4MkEsJ/QZY84wopkq7Q7PzYTCh/TB  
dTXDSD00QyLp7AMY+Zu01D4wjBqD37LxpT0A5mWeCb05YURh5fvmKUMWmET  
n  
peztd60Eu9ifZbFZMPbY/FfsSRlaEiX+u7KXBXJ8e7ya/CS0+IGzdycEB3/L

LpwilyUhtdIGAa5VHMytEW0VNUmoLp+6XHwdB/Y6JXfCDn0RZyatsomDa2xW  
SY2H5opaVrP7gwN+2x1rVS0S2rXju5pDhoe3z2dIoE1CVYyJ2cwn8SDj7aSt  
pktCAres6Rmk8HBWXQQuGpDQI++iLC4ZPHDqX3XxPjTT9Q00CTk86CxTBJYf  
mgxzX9RQEQ+P9usuCxmS0IRoi26S0h7YvjhPchmREG5SKIoaiweDRwOF1If9  
6MRo4HEWczzwHjSbaR46uud9+jlLPFwcDFuKPLRfvd0TLVs8+BV6j+0c2igz  
rSnKCQ+r2l8e/TiloQ8JE5qZ1/GwbNuecQ5DQsqRlj1PXfHAXvLCz/HQIl5t  
X1o88BDV5bs0dugCp500g154+JtxNf4MloRYbewXpznzwwBNsS2d66DSTspur  
vnhgWHUPST40tc6f7QN/PCwEZfZ3HPp/x0L80A==

"}],

{RGBColor[0.880722, 0.611041, 0.142051], AbsoluteThickness[1.6], Opacity[1.],  
LineBox[CompressedData["

1:e]wVlHk01IsbxqUQiJIGipLlihaxj7P8LWUnYwIhXRL9hiM+VL27ImZtBAu  
Krq67i1GbhtZlpVKi7G0qHBpElla7s/vj/e85/PHe85znvc5zwa/UJcAYSEh  
ofKF+f82+friS7i0EE1It/Dv4RRv2mDu8LV/mf20+//KlQp5GyGhnXKshjlo  
MxtPXEOOr3oVH7w33ZDF/0qZfD50x9NyLzLq2a7KBwih0avg5eckbtRER1Ddr  
RDGyafz5tLsvZibbCDZz0T5YnYwsnw9Atgdv+Pf8FTg/W5BoQTmMEp7UZclA  
GYh/rnV6tzEQzbG8La/WyCHz+qWCFf3BeP5K6itNIA/610qzgiJQfDQ8eKOy  
TQHUS0tclbNhk]yXMo1kUvCG+u0bXSEC6zwPCvXZK8OzanF2TkcE5Pv5by7m  
r0d2H0fUN+wYNE31K8QCN6jW0LM7ozwS+uN80ZtuKvhPZ9/mjq1RML6QdjiE  
roo2hS+S+29Ewf4nX/v5GnXcCD7cs7GGCcbVtOz0JZuQayTCWEa]xn5v/c/G  
gk3o71Pmt6RFI/yftLqyNk3YFm]sGLGNASTYfxXjLy28cfLwGqu]QRKIP0q8  
RBs]Qra94/MxKCT1DcOYOpiLfms6zYlFsU7/WRU/XSh9l9ZmDsSisj/tR6/9  
Frxb885tbAML/OK]weL8rXhpV/ci/QILQ9+a82KW6sHdueKKbC8Lww5Fd]d4  
PeyOjzflzDxC+LcpFAfZjpGEjdD4rDJENhz+CgPiQPypQbFsVh5o+JJTy3

bfiy2dZlojkOP0Rbrud3boOPt1mKx2gchPYXHQqib4eJauuFXdJsLKkPkbeq  
344f0j5hc3psiEsT7co6O3B0xKsn1YUNmdsTmk/X7ARl7j5Znc2GnHzL65qc  
nWjx3FzDvMSGYmhRZuoSKrhN/P70u2ysbwsxOcCi4oCCUtDsSzZUIYlxQwEV  
cdn3/Psm2NCIViiWPWQAyjSRYrWYhM6jCYfxPgOI9Pwcs5MjsTOh6NrFNkNI  
7HbpjDIgYfQixJdlaoQ7y29rNFqToG0hZPb8ZyRuSbsHA24kiDSFZh1NY5y5  
ORAz6UfCZnDimFiJMXyKJq0Wh5Kwo7aovllgnO71Rcrs0g45xY9b8wwQamy  
/haXZBKMjyGpBUKmcNM7Onwpm4QnjaCGME0hc48/pMshoZumVaz3zRQxW53H  
sopJCD9aITIdZYbMLzI+0pUkeuVmjjZMmyHCz7zuXg2Jap/+nrGoGiIpQ351  
dSSOVzYb0qZp4PrJNozUk9Ca2eN0wgg4OTE8G9FEYpVi+2J/FpAt/XPG/Q6J  
X2bG9UQjcFDQrF7WTOKT3x+B6vPAJ0arvGcriZ7UDUpLjeholK3cnt5OoulK  
wZORWDqSjXOttz8gUdUtlLJo4OzJbsooJNE/iTL4OocHSHPLGxUukiw5SbG  
cgzNceCXYsuxBT5k5FsSFmsOC9mHdt4L70TzzMWFZ455paoHwwwv3RonWotvn  
zPF476rLMgusWtnIW21oAfPHWiYjHSSkHugEz8RYQPEHzzdkQc/c+MX1rxos  
oOx74Wblgt73K1c9a5y1wK2ln+9yWkh070hLO29AYA275oT5PRINHvNG8TEE  
NF/Lfb16m0QZGTyxv4HA9Pv6Vv6CP1mlQ6X0WQKZGb5BPTwSzPuubioGlrjN  
3UTPv0HCdrlR04d6SzzTEM9h1y7kR+9qaPuMJZ7vKW2pqSax3m29yhWqFRKc  
LyXVVZGYOi+aEVxvhafX/4u0KSExcFw1HHGctRWZ9X+syTa3/8r2Eq1hvWU  
P8tp4f8XNj91n7phjZoEw4bXWSSsmkrU4m7YgH9lvP9qDlkzfQZ306/vRqu2  
Y10aHQnjtUdny/9yQHdx0s2cMTZa3kYJdn12wAoVt491w2zYVR//9FnLEVMO  
Au7TQTZ8TDgvjcs0XSxJVXyGRv02gP8IzZOILR/De1rYuPgk8ymRVRnlA53  
NFRlsXFl9Vu23ipXsDo1q7s2s7Gz00dnXjcDFRPTNddC4pB6M7d3gOIDa8Ph  
p0+iLly00i59L+KPqc9eMvcKYzBP75lYxzsE02JH11+00ciQ56eU3wzEeW03  
foYwEzu+8tLDq0MwuiGy2+5hJAKWnRy9qx00RuPs31eajiFsYPZTuOYx2KtO

VqhXRCD0udoyQiQK/eaL1VL/CAf7kckw7wUTyTr700EdYehI53J6n8Sg6nMb  
o7YpFBK/1QatvsLC4LtW+ZeUEGQukVT8fpmNDxrddR2RQVhb4ZSQfDEen8yE  
tkqMBcLhuuaSM0bHwT/4WrY29whqZ7q23zU4gRCxWOtA7cPI6Oq0/q6WiC0d  
ZcIyXw5B5MSkuvimJJDv1Px0agMgRpX887BKMrR6bWwlUg4iKSHR/pVUCkQ8  
Qq2E4/1RUqXIoeilYrU5bdQ/zA87/GTDI36koqDld/W4RF+4KAn9pvAhDe5H  
WcXHKw5AulGq4/S7dJTVerUnp+yH1ac4U+XHJ0FvfXErYNoblG8SSvGPM2Db  
vJJM2OeFOJHcV7pdmQhjHDHtHPSEa1V4leBGFubaGxe68jzQqcF8k3I9G8bt  
sXRLw724ZfJKZ3N5DvgaY90qEu6guui5qWblispZLjBD4IZL5W5T0UQeDksp  
M2Ie7UHER7r1ocY8VDq/OHvksSuWKdKczIxOYb+lsLxwpwvecY++Lf7zFB6H  
bCxzee+M+EIZv0vq+Ug2aGQuk3LGSOID7rmKfjwNnCKp+k44xfuTib/uNMpf  
Fy9iDjlAfOhyJ/v8aVyo81wk7Wq/0LfrdDPXFoA3l/dw5K0tmqJvKWzMK8Ar  
xUxLmeLdWLI3/GaZdCFKSssLfjrtwskTrh+qUwsxau45vVTbBj3a1355fy+E  
3dZd5wQK1hi7T3k4F8vBUYG62sVfVqBfblRVEnBAKmRoQMISDSViNTqTHLio  
mWYtF7XEVs6ebaZTHNzyWTnZt8gSSkTdk9ZDh52U5rj5gjMe23cf1alIy9B  
yyPbPhGoW5FRJLeSiz4zKX5OGwHVGA8paX0ugkS61/JTCJwLqSxU2s5FzOgG  
u44TBGQCvq7T3cmF6rdv0fUkASGXbG17Iy5St+nd4kQR6Ne+a5NpzkWVGu3X  
gQACnEGNJDFXllj30+RVLQks742SkHfjYiDy8LP1dALJXfdOqbtzYX7qe5qS  
KYEIntdFy31caMQ69qzbQcDhdN4/Sf5cKA3sHldVI3D/ZD9xOoALWvc+D80N  
BEyOa3WV/cZF4XfbRl0KAa3gltd3j3IxHzXkYbKaQKn/Sr8nwVysnpE+Q6xc  
6FVPn5GhUC4SKDse2C8nkOdUHSYI58IkabXAXZyAmPXszH/HuHC/xxT3FyHw  
P2seoWo=

"}}}

{RGBColor[0.560181, 0.691569, 0.194885], AbsoluteThickness[1.6], Opacity[1.],  
LineBox[CompressedData["

1:e]wV0ms4lAkABWAJU2iUNiahTVKaCImd1jRHkS4rVgjZbJjUVGpYg02532Uu  
3zfhQ3lEsumsrWNlNVdSVKRjVAILZS2EdLO/jjPed5/58dZFHjQg6uqoqLi  
r8z/7TDa9p6vo8KJ29unIH4cW9sl7Dv7RtDjseQjT9HUxom9YxReKXjLsb2b  
303m0MhJDe7d8J7xiROsVnpE/cso50EvyzNL8IUTNc0qJ/nrBCfz/O2zc3mq  
s00NlZS7qalqLMy+h6GBzz5cPdQqBhQfbjvFCGbhPHcxix05G8d85X3Fktkw  
bgt007FsLgrk9Hltni7iX4079ijm4Xq0fGU7Qw+sorhNVwYXQGuczv5FYASH  
T9rFB6jNYegXrPLMdSEuqFoIgl1abQb+zo6dQ8i3qTATP3o4vhTnbpoTGM4En  
u9KqopAJ1y8dzCcMM3hN2x3RXWwN6REb1iGBBYJ1glysn70Qb9GZuzjQEr6s  
tw8fvFuD0s7UyVbXlfiB657rMd0BHfnDXfkSK5hotWRIVq7F8NT6InWeDTgp  
MXcMXB2hWzds/ohhB6+AqCXtLc7w4zjZhwrYeNV1eVk0ww3fG+wbK6reCuEK  
OhFwbxfs8r0/ijq80V8Xkut9hoeUy8LW50Y7Mb/k392TEXwMDbnN6FUPgt5S  
B3PdMxEYd2wZNPtvhkWxu68BNxoz+h3JRZd5cLyx9iPD+ghWj8rT+BWhKJ6y  
vVDiGweudvpQPZOPsri91g098Tj0fGyAbx40+gnaikXRiTj4Zlm2k3oEiser  
t7Z2JCHmgUOfvE0A+RwNFx+zFDSkUblWh1HQcja0SopMhWZl1f55v/+K5sky  
VXphGjLVtBZMlMcg93qNorspHQYl7rFjhuex3aNyZkB/BrZeMfc7viYODaUV  
W9Q6MlGlaLSt/y4egaV6dYrWLGQ0NkVOLEkA8+PTpvDqY1CP/2A2c2kivrGf  
uGdHZoNmr3Vuz+IkNJ/s8/YPEiIxNsG1nZ4MTeaYX462CAWnF3gb0VNAJswv  
3rJXhNWbc/lhkymwuZawtKBGBA9jLZD5/an49cD62kvqYujU0Bull2mQSbj7  
N3ulsWHgMHthczoiXmpag6RiGH3SND7anAH2DLbpyXYxDqsL2y0bMxG/z2WP  
N00Cbaf5p0cuZuHMyMN5dm4S3Fsm6Em+cAwNUubKqRQjrjq0W6woysbC+10c  
+r8ksPew9jLNEqLlz/xdBb0SIBV5fYx0EmH0/ZtFq3QJhL1ydNmt3Lnq0iPJ  
JxYB7QUc97VrxGAYNtaxAgm8pPa9yD8nhmfr351bkgkcleoGlplJMH12zctD



JQQGE+5SeSUS8ArWmY/cJCCWn/PWNyQQKrzSZP6CwMzu8nsxvxFI23UiUjpF  
wCnV0DLTgITRux1lPAaJ2sir801EJHYS6RdvWJJQ8+FfPqUjRebtoSpbZxLp  
8dv6K1KkyOv22JXtQ6KFeXbqpwkprkgUmwx5JF7fNlR/OVoGDVP5krLDJBzL  
a0yNR2QYfOnacz6DxKUCWqXFBxluufMcRpW2knmuYn+UISPAK3ZVJgnjxGFH  
/zEZBsRVtdVKj/ubBOSqUEiy0NerziJxfnZGjt4cCuuqazf+kU3CNMqXrmND  
gbal8olQQilvtFRqbEshf/Pj1feV1uWOGlraUQg/nXhUkyCh4nGM6bqGwrZY  
YUOS0p3M+o2Z6yhYPJncEEWSkHUtS6Rto2CZYt/rJyMxqzVCU9+LQqhP2gOZ  
0kmN18Rm2yn8fKu2qEXpMLl/ofMOCsmifo3NFImthOhKYhCFgbynl+yPk7iZ  
3ulEcCm0zex5Haa0Q9zyxlMhFBo2faadUXr5gRv/10+j00V3cGJxDomTQXMC  
Hx6gQLGetuxUmuG3c7D7IKX8XQiRo7TiveLQCJ+Cp/Mi9mOlaS5jiq/hFIZj  
tZvpuST+A61Pqg0=

"]]]]},

AspectRatio->0.6180339887498948,

Axes->{True, True},

AxesLabel->{None, None},

AxesOrigin->{0, 0},

DisplayFunction->Identity,

Frame->{{False, False}, {False, False}},

FrameLabel->{{None, None}, {None, None}},

FrameTicks->{{Automatic, Automatic}, {Automatic, Automatic}},

GridLines->{None, None},

GridLinesStyle->Directive[GrayLevel[0.5, 0.4]],

Method->{}

PlotRange->{{0, 1650.0371}, {0, 1521.067794}},

PlotRangeClipping->True,

PlotRangePadding->{{Scaled[0.02], Scaled[0.02]}, {Scaled[0.02], Scaled[0.05]}},

Ticks->{Automatic, Automatic}] \) \!\(\\*

GraphicsBox[{{},

{RGBColor[0.368417, 0.506779, 0.709798], PointSize[0.6], AbsoluteThickness[1.6],  
EdgeForm[{GrayLevel[0], Opacity[0.3]}]},

{RGBColor[0.368417, 0.506779, 0.709798], PointSize[0.6], AbsoluteThickness[1.6],  
EdgeForm[{GrayLevel[0], Opacity[0.3]}], PointBox[NCache[{Scaled[{Rational[1, 2],  
Rational[1, 2]}]}, {Scaled[{0.5, 0.5}]}]}]}},

AspectRatio->Full,

BaselinePosition->(Scaled[0.1] -> Baseline),

ImagePadding->Automatic,

ImageSize->{10, 10},

PlotRangePadding->None] \) blood

\!\(\\*

GraphicsBox[{{},

{RGBColor[0.880722, 0.611041, 0.142051], PointSize[0.6], AbsoluteThickness[1.6],  
EdgeForm[{GrayLevel[0], Opacity[0.3]}]},

{RGBColor[0.880722, 0.611041, 0.142051], PointSize[0.6], AbsoluteThickness[1.6],  
EdgeForm[{GrayLevel[0], Opacity[0.3]}], PointBox[NCache[{Scaled[{Rational[1, 2],  
Rational[1, 2]}]}, {Scaled[{0.5, 0.5}]}]}]}},

AspectRatio->Full,

BaselinePosition->(Scaled[0.1] -> Baseline),

ImagePadding->Automatic,

ImageSize->{10, 10},

PlotRangePadding->None]\)      liver

\!\(\\*

GraphicsBox[{{,

{RGBColor[0.560181, 0.691569, 0.194885], PointSize[0.6], AbsoluteThickness[1.6],  
EdgeForm[{GrayLevel[0], Opacity[0.3]}]},

{RGBColor[0.560181, 0.691569, 0.194885], PointSize[0.6], AbsoluteThickness[1.6],  
EdgeForm[{GrayLevel[0], Opacity[0.3]}], PointBox[NCache[{Scaled[{Rational[1, 2],  
Rational[1, 2]}]}, {Scaled[{0.5, 0.5}]}]}]}],

AspectRatio->Full,

BaselinePosition->(Scaled[0.1] -> Baseline),

ImagePadding->Automatic,

ImageSize->{10, 10},

PlotRangePadding->None]\)      gi

(\*-----  
-----next mouse\*)

vn=readTac["C:\\Users\\exx\\Downloads\\TbD120M2, Liver 2.350625, GI  
1.160875, ID 4107.csv"];

Lv=2.350625;

Gv=1.160875;

id=4107;

vn[[1]][[1]]

{{10,229.037},{30,399.334},{50,113.024},{70,61.9852},{90,41.8743},{110,34.0031},  
{130,25.1198},{150,22.4501},{170,20.3014},{190,21.377},{210,19.7868},{230,21.16  
81},{250,24.1004},{270,22.6304},{290,22.7937},{330,22.4904},{390,20.4029},{450,  
17.6317},{510,19.7239},{570,26.807},{750,27.9593},{1050,20.4355},{1350,13.5939  
},{1650.04,10.8707}}

model= mouseModel[Lv,Gv,id,28]

ParametricFunction[!\(\^\*

GraphicsBox[RasterBox[{{179, 179, 179, 179, 179, 179, 179, 179, 179, 179, 179,  
179}, {179, 180, 180, 180, 179, 179, 179, 179, 179, 179, 179}, {179, 179, 180,  
179, 179, 248, 248, 178, 179, 179, 179, 179}, {179, 179, 180, 179, 179, 253, 248,  
179, 179, 179, 179, 179}, {179, 179, 179, 179, 179, 248, 248, 179, 179, 179, 179,  
179}, {179, 179, 248, 248, 248, 248, 248, 248, 248, 179, 179}, {179, 179, 248,  
248, 248, 248, 248, 248, 248, 179, 179}, {179, 179, 179, 179, 179, 248, 248,  
179, 179, 179, 179, 179}, {179, 180, 179, 179, 179, 252, 248, 179, 178, 179, 180,  
179}, {179, 180, 180, 179, 179, 248, 248, 179, 180, 180, 180, 179}, {179, 179, 179,  
179, 179, 179, 179, 179, 179, 179, 179}, {179, 179, 179, 179, 179, 179, 179,  
179, 179, 179, 179, 179}}, {{0, 0}, {12, 12}}, {0, 255},

ColorFunction->GrayLevel],

BaselinePosition->Bottom,

ImageSize->{12, 12},

PlotRange->{{0, 12}, {0, 12}}]!\(\^\*

GraphicsBox[{{}, {}],

{GrayLevel[0.55], AbsoluteThickness[1.5], Opacity[1.],  
LineBox[{{9.09090909090909\*^-8, 9.090909090884856\*^-8},  
{0.0874367476365131, 0.08197166587636243}, {0.18222810297558026`,  
0.1358255024317191}, {0.27073779576926765`, 0.13315455086535802`},  
{0.3575112797365835, 0.08143316377978886}, {0.4516394623155443, -  
0.007347854733426912}, {0.5394859823491253, -0.08816932746972758},  
{0.6346872009943513, -0.13787329990112937`}, {0.7281522108132057, -  
0.12816574147938434`}, {0.8153355580866803, -0.07001063326902106},  
{0.9098736039718, 0.02121659675083076}, {0.9999999090909091,  
0.10024804094746914`}}}],

{GrayLevel[0.55], AbsoluteThickness[1.5], Opacity[1.],  
LineBox[{{9.09090909090909\*^-8, 9.090909090880112\*^-8},  
{0.0874367476365131, 0.08090369567458766}, {0.18222810297558026`,  
0.12746559200130417`}, {0.27073779576926765`, 0.1116266937044405},  
{0.3575112797365835, 0.046963725126600256`}, {0.4516394623155443, -  
0.04509050859182233}, {0.5394859823491253, -0.11115559892361665`},  
{0.6346872009943513, -0.12642564594664163`}, {0.7281522108132057, -  
0.07740196037964171}, {0.8153355580866803, 0.004179083230780074},  
{0.9098736039718, 0.08937493944143977}, {0.9999999090909091,  
0.12834702174618903`}}}],

{GrayLevel[0.55], AbsoluteThickness[1.5], Opacity[1.],  
LineBox[{{9.09090909090909\*^-8, 9.090909090875369\*^-8},  
{0.0874367476365131, 0.07984396759533968}, {0.18222810297558026`,  
0.11939549826670079`}, {0.27073779576926765`, 0.09184904274707059},  
{0.3575112797365835, 0.017913117173780694`}, {0.4516394623155443, -  
0.07109962300031061}, {0.5394859823491253, -0.11717052830989395`},  
{0.6346872009943513, -0.09879571259704382}, {0.7281522108132057, -  
0.022693471356141894`}, {0.8153355580866803, 0.06128703302641453},  
{0.9098736039718, 0.11605625481609519`}, {0.9999999090909091,  
0.10415981267620744`}}}],

{GrayLevel[0.55], AbsoluteThickness[1.5], Opacity[1.],  
LineBox[{{9.09090909090909\*^-8, 9.090909090870287\*^-8},  
{0.0874367476365131, 0.07879243663407876}, {0.18222810297558026`,  
0.1116081822210312}, {0.27073779576926765`, 0.07372482040530459},  
{0.3575112797365835, -0.006267252216927747}, {0.4516394623155443, -  
0.08743897872291118}, {0.5394859823491253, -0.11109134853087661`},  
{0.6346872009943513, -0.06371549528296311}, {0.7281522108132057,  
0.02544576624054603}, {0.8153355580866803, 0.09464282937855747},  
{0.9098736039718, 0.10731931496853601`}, {0.9999999090909091,  
0.0516787429232188}}}],

{GrayLevel[0.55], AbsoluteThickness[1.5], Opacity[1.],  
LineBox[{{9.09090909090909\*^-8, 9.090909090865543\*^-8},  
{0.0874367476365131, 0.07774905743802465}, {0.18222810297558026`,  
0.10409673959866513`}, {0.27073779576926765`, 0.05716133039337165},  
{0.3575112797365835, -0.026084496726167965`}, {0.4516394623155443, -  
0.09591154799603378}, {0.5394859823491253, -0.09685594593277226},  
{0.6346872009943513, -0.02730376120671303}, {0.7281522108132057,  
0.061646715198529656`}, {0.8153355580866803, 0.1046634148537508},  
{0.9098736039718, 0.07509702498429204}, {0.9999999090909091, -  
0.006536873471333553}}}],

```
{GrayLevel[0.55], AbsoluteThickness[1.5], Opacity[1.],  
LineBox[{{9.09090909090909*^-8, 9.0909090908608*^-8},  
{0.0874367476365131, 0.07671378556951527}, {0.18222810297558026`,  
0.09685439581479163}, {0.27073779576926765`, 0.042069810325321415`},  
{0.3575112797365835, -0.042006785469922474`}, {0.4516394623155443, -  
0.09808544986431629}, {0.5394859823491253, -0.07760167026270944},  
{0.6346872009943513, 0.0063643674428021085`}, {0.7281522108132057,  
0.08405712128907425}, {0.8153355580866803, 0.09555213349985489},  
{0.9098736039718, 0.03202960165577907}, {0.9999999090909091, -  
0.054402034659985464`}}]}],
```

AspectRatio->1,

Axes->{False, False},

AxesLabel->{None, None},

AxesOrigin->{0, 0},

Background->GrayLevel[0.93],

BaseStyle->{FontFamily -> "Arial"},

DisplayFunction->Identity,

Frame->{{True, True}, {True, True}},

FrameLabel->{{None, None}, {None, None}},

FrameStyle->Directive[Thickness[Tiny], GrayLevel[0.7]],

FrameTicks->{{None, None}, {None, None}},

GridLines->{None, None},

GridLinesStyle->Directive[GrayLevel[0.5, 0.4]],

ImageSize->{Automatic, 28.4375},

LabelStyle->{FontFamily -> "Arial"},

Method->{"ScalingFunctions" -> None},

PlotRange->{All, All},

PlotRangeClipping->True,

PlotRangePadding->{Automatic, Automatic},

Ticks->{Automatic, Automatic}] \) Expression: {Bl,Li,G}

Parameters: {k1,k2,k3,k4,k5,k6}

]

```
Manipulate[Show[ListPlot[vn[[1]],PlotRange->Full,PlotLegends-  
>{"blood","liver","gi"}],Plot[Through[model[k1,k2,k3,k4,k5,k6][t]],{t,0,1500},PlotRa  
nge->Full,PlotLegends-  
>{"Blood","Liver","Gi"}]],{k1,0.001,0.2},{k2,0.0001,0.1},{k3,1.*^-  
6,0.01},{k4,0.001,0.2},{k5,0.0001,0.01},{k6,0.0001,0.01}]
```

```
Manipulate[Show[ListPlot[vn[[1]], PlotRange -> Full,
```

```
PlotLegends -> {"blood", "liver", "gi"}],
```

```
Plot[Through[model[k1, k2, k3, k4, k5, k6][t]], {t, 0, 1500},
```

```
PlotRange -> Full, PlotLegends -> {"Blood", "Liver", "Gi"}]],
```

```
{{k1, 0.005200000000000001}, 0.001, 0.2}, {k2, 0.0001, 0.1},
```

```
{{k3, 0.0008500000000000001}, 1.*^-6, 0.01}, {{k4, 0.0012000000000000001},
```

```
0.001, 0.2}, {{k5, 0.0058500000000000001}, 0.0001, 0.01},
```

```
{k6, 0.0001, 0.01}]
```

```
Clear[newmodel]
```

```
newmodel[k1_,k2_,k3_,k4_,k5_,k6_][i_,t_]:=Through[model[k1,k2,k3,k4,k5,k6][t],List  
][[i]]/;And@@NumericQ/@{k1,k2,k3,k4,k5,k6,i,t};
```

```
fit2=NonlinearModelFit[vn[[2]],{newmodel[k1,k2,k3,k4,k5,k6][i,t],{k1>=0},{k2>0},{k3>=0},{k4>=0},{k5>=0},{k6>=0}},{{k1,0.005`},{k2,0.0001`},{k3,0.0009},{k4,0.0012`},{k5,0.005`},{k6,0.0001}},{i,t}]
```

NonlinearModelFit::eit: The algorithm does not converge to the tolerance of  $4.806217383937354 \times 10^{-6}$  in 500 iterations. The best estimated solution, with feasibility residual, KKT residual, or complementary residual of  $\{1.80204 \times 10^{-11}, 0.00189023, 4.89012 \times 10^{-12}\}$ , is returned. >>

```
FittedModel[newmodel[0.0273647,5.86338*10^-13,<<22>>,<<21>>,0.0363698,5.86338*10^-13][i,t]]
```

```
{fit2["AdjustedRSquared"],fit2["AIC"]}
```

FittedModel::constr: The property values {AIC} assume an unconstrained model. The results for these properties may not be valid, particularly if the fitted parameters are near a constraint boundary. >>

```
{0.940397,901.432}
```

```
fit2["ParameterTable"]
```

FittedModel::constr: The property values {ParameterTable} assume an unconstrained model. The results for these properties may not be valid, particularly if the fitted parameters are near a constraint boundary. >>

|    | Estimate                  | Standard Error | t-Statistic              | P-Value                  |
|----|---------------------------|----------------|--------------------------|--------------------------|
| k1 | 0.0273647                 | 0.00452072     | 6.05317                  | $7.49422 \times 10^{-8}$ |
| k2 | $5.86338 \times 10^{-13}$ | 0.000468523    | $1.25146 \times 10^{-9}$ | 1                        |
| k3 | 0.000782161               | 0.000258634    | 3.02420                  | 0.0035491                |
| k4 | 0.00513412                | 0.00127794     | 4.01750                  | 0.000153229              |
| k5 | 0.0363698                 | 0.00643993     | 5.64755                  | $3.72871 \times 10^{-7}$ |
| k6 | $5.86338 \times 10^{-13}$ | 0.000255439    | $2.29541 \times 10^{-9}$ | 1                        |

```
Show[ListPlot[vn[[1]],PlotRange->Full,PlotLegends->{"blood","liver","gi"}],Plot[{fit2[1,t],fit2[2,t],fit2[3,t]},{t,0,1501},PlotRange->Full]
```



]

\!\(\\*

GraphicsBox[{{}}, {}],

{RGBColor[0.368417, 0.506779, 0.709798], PointSize[0.016666666666666666`], AbsoluteThickness[1.6], PointBox[CompressedData["

1:e]xTTMoPSmViYGCQAGIQDQEqDhy59+7qL8xxgPDtHN7OPOUe/rUCyvvd02MxT

uKbbMQbCbwh08PZfIC/zzw/KD3PQf6JV+fK9C5Qf7SDv2iKTzuAI4TskODy+

2bVojZwlhH8gyeHd2Y1brlrNoPKpDqvYut5q+JpA5dMdCgl2KjQnmELsxxS

2iRjsk8aQ+VzHKIYXmRxacPk8x1kPmx33SRpAeE/KHB4cvd0TMpCqPkKRQ5N

Dcem6Z+G8heUOHw728jXUQvIj1Q46JUzR6ilQ+1XqHEwj9/VvH2hIdS8eoc6

qWs3/HZC7b/Q6PBT+qn7zHNWEH5Bu4Pkf0GeKV+tIfyMCQ5np09Wr86Hmicx

1YFNeU+cmIG2w4E382x0Tsx0eDLt0Ztze1UdAH9bcjg=

"]}],

{RGBColor[0.880722, 0.611041, 0.142051], PointSize[0.016666666666666666`], AbsoluteThickness[1.6], PointBox[CompressedData["

1:e]xTTMoPSmViYGCQAGIQDQEqDp9bbzXM/OrgAOHbOaSVT9p3a382l0/poHu+

eXdxXSWE3xDoUO+TfTniRB2UH+ZgP+figkefGqD8aIfEx7/K9x5thPAdEhy+

M3rkTgprgvAPJDlEdV7h//oQyndldXj6/ILxcbtmqHy6A4cdm7bcPCjflcth

xyxty17hFqh8joPXoRKBXSZQvkO+w0Nvm9+sMVD+gwKHXR5uxZ4SUL5CkcMJ

kycv3c5CzVtQ4qDJIn5hQiCUn1Dh8DXft2BCFNQ9CjUOlQqbPC7rQN3/oN5h

X5GE+s0aqP8uNDrsWJO+NvdNPYRf004wN+o404TZtRB+xgSHpWn8WxYdgoaX

xFSHQ5VNfCrJ5Q4H3syz0Tkx02HuTNZ6lpxyBwCZSHjR

"]}],

{RGBColor[0.560181, 0.691569, 0.194885], PointSize[0.016666666666666666'], AbsoluteThickness[1.6], PointBox[CompressedData["

1:e]xTTMoPSmViYGCQAGIQDQEqDknHRZ7JrDJ2gPDtHE4lOq6+W5MK5Xs6cB5v  
Nzm6LR/Cbwh0aMrNvNX1pBDKD3PILpG4y72lGMqPdojxKlueEVAK4TskOAj8  
4I2t+IQG4R9Icrj69o22/45yqHyqA+/cFyz7yiqg8ukOB4xfX5M5CuU7ZDk8  
U5myb4NNJVQ+x4Ej6NyexrVQvkO+g8f5x8+4blVB+A8KH06vcuNyWFUD4SsU  
OSimr74ztaA0wl9Q4vA8xIhhincjh9Q4aD9bfrdz5ktUPU1DodzYo/WfmqH  
mlfvUCz6bIb6uS4I/0Kjg1CAzSGTmz0QfkG7w36uD3efJUyA8DMmOLwwXnDv  
zNeJEL7EVIH0lzzc69MdDjwZp6NzomZDsrfOBfsiJviAACXk3y2

"]}], {}, {}, {}, {}.

{RGBColor[0.368417, 0.506779, 0.709798], AbsoluteThickness[1.6], Opacity[1.], LineBox[CompressedData["

1:e]jwUV3c81d8bp4yMJCuzCVkhZF6cz2MTsvf42nuPa2/uvalkZSWpKEooMusW  
pYSIlMhKEk]WisLv/v66r/frfj7zvN/v5znnueka5CZxz4qKqoheiqq//+q  
rg+vhhyiwk5BDHtmbwFMXvlWt4gfx9hzD9kFsBRAYtfxsGr8EkZ1qoCoYpUP  
/TPKFpfw01hDVnrC3GYeXHz0uu6I7z7oSR4a8DfOg9rQUMUvnHSgvPgUTj/I  
hd9rr7Xi8AdjPqVUV1kDly2bflWnsMKdm7Z+ilz2XCjhaWKyZcNCpmNqJUt  
s+FFdMuZEc5jsPug+FyxVhYwbbOoheOPQ8svPlnxqkvAa+d09dnoBDgNX56X  
eXkROMbHvpTl8EPN3wK1/2YzQExNtoLeVwDYlHwTdbELILs0RtdmKQjOg+uN  
eREkULlO9A5UF4lanifLko+IYLQzdvoDpzCQGtgOx6gRwOoB8TKJRgSu9VII  
vr2YDv85yv5UWRGBY1YRr6sn0yDkKfHRrddi4H9M082hIBWuxssqB+MlIa7o  
hM5+jWQolRwvFnSVgnAj+QKh5iS4M07899HoDBgqOgzmyCbBWOnyZGmONLjM  
nte84ZUAU5svsqIOyMAzd8f15vB4+Ha+SN0sQQYmuA8HeV6Ig+Vdzdu0vrLw  
0H9EJ6srBtasuCwmJ2XhrWB4YcFaNPYuWaZpsTwLQ7vtQYaC0UD1X5Gnv7oc

3NfWcftREAlsz5bF3nMqgHDRobcZXeFwjOPlaHWmAjDc3o8lC4QDT1DRRQKN  
Ijwjtj0moSA4DoRNAs8orinCcTfD+8PIQEI3kKj3iqQR6uY3Prj4JAcn+5fNL  
n5Xg8Qu6hWmpEFBILKore60Mi2JDyaX8wYAbDnSJUCNB5D/RiCwsCLAzWmwW  
9TgoCHK8sqQdCHqTy2H0N1Sg6f0Thpc+/mCHaSkG4tWglX+gJ4jeB6SI4qUy  
m2qQJn9ucE3KG/b1s9L+ikBQt3Bt7LWjF9x3Gh+MjcDgmdOfcM93HpB054Uy  
9gsDL5WB6aYjHiD+28lkGQewQCdf4uvoDrtIpUmrFaCZpw2x73eD0dcaX+Ft  
ALumiz9vObnClOEK3wGcOny8eXHm2TMXuNtHn97Tog5N1Tervmc7g4nTkjJZ  
iwYwHtjLPTTtALgUXTq5LQ14e0U0TnXOHoTutLawK2vC+R7H2ZFN09haKuMf  
adaEAN3gP/oStjBz+OhQ6x9NKDsS9yrTzAb65InEEiUtsFgmEyWTrOFWfMDy  
f81awGugN5m6YgmXbk7dVP+jBcXahqLtsPaA7zS3FFTShhMnSmk9Yy3A4CDu  
yWyTNjCEsnQePmEOGyV0GQFN0rC/sdjC4J4JTDyPVjP+rQMfbK66iHCbQNfM  
4oq0oi6YuweOdhw3husS7603GnXBr+stlYfZCEgmOkwfn3Vhw3dyzvSwIYSG  
t5CbFPTg/K/9/pl8BqDz5Map2EY9IC1umVub6oP0FNulw6YevKtEsg54PeCm  
IVxCCvrgYZbx8/Utxfhp4L903agPx+wb0/pZdaDws1I76fE54HnFflZJRRNS  
9u6H+/46B0lRtwen8jTAX/CEqKG8AVDh+1zFNtRB3Y/2yqHHBmD92aB9qANA  
4kqUxugAXxo5f4xKgNwrP7Hr0E5Q+DD1dNkGWCwsD3gkN9gCCH/qnJsFNVg  
iE+bNWrDEAQqzircxqkCwaP5ha2ceZy2JExG6ahATkap+PEGI1hOnZG+gVcG  
FW6/P7frz8OkwTlVlxkFeDkdsal/8zwUrazYjMflg+H9pLmf4sZgXlzeyvFO  
DpxU8z+p3DIGtxMidKNpZ+E7zc13X8aNIWX39nmG77LQPGs584LZBAo83gqf  
PS8L6rXOYz56JpCXq3RiTfWGCeC8P6l6msDrcom/LGXS0B3pN3QozQRqtAos  
b3Njgxngex8/M4G08o38N7JS4D5w8Qm1oingmaKzA6+IQ6V8dvOQhSmIemTF  
1TSLwVJRfsPdUF04iCWwN8+JAt71ZrVRjSkseXGf1XMQgdZXdyr5e03hUwJn  
n0cNYdgVry5fnzcf6/xRkfi5U0BcbywpOmUGm2+j/xu4KAS91k8K/TXNgKwj

MVD3TRBYn7TnYS5mwPZ2c6lfSxAK03ovfSsXg7nuB/On2ATgHvt0nMxRc8hm  
nOG99eYELEd/j6KRNYfO0LiyG118cHZiMXzY2ByocwtfNfcfhyd3fvvHXzSH  
QyYDIhq/eICkacfbpMoc3HqllxWO8IBW0D4PwdfmYFwiec1IiRveKh50fLPP  
Al490prczecEthl22xj+C/j35eIZqXccYEXFaRmELOBdG9PVikMcMNEIYMqe  
YwGChhXp18vYYcVWSc111QKs3+XOF9EeATmymrLcIUu49jcqt9ePDaIFNOXp  
JS3h3n2V1s8fD8O+H0aSD7wtQWGQo221lRV0jM3FkgiWUJA/2nn/LCtk1Nuc  
Mi+3h0746bvWlOfgSjzb8a1JSyD7NXosBhwEmylvrt4dS7DVkaveSmSGEq1A  
9hs8VnD5dv/1C0VMIHQw+qC2tRUYfpCv0J1mAIXSzJ2sPit4kez39+8L0rh/  
a02u74cVfKjvz4s+RAf8d638mRisoU44Z+WyMy0w1ff9Tte0hi3v+K9v2Ggg  
qSGF7YWzNWScqEy6EbYfNptn9akSrIHBr3zcbWQfTLXXNMc0W4PMBZYhznpg  
sHzFttL0wRryJSalnwtTQ3c3XuTXmjVYBBVYtpdSweP3KD9I0gaaWk58v6Cw  
h2V86wtzv2UDaokjUiXpf7G9edn7N5/ZwD/q1kMu97ex8OX86YkxG8CPu0x+  
H97C/vvtZGrLYQt3ymov+2n9wYb+dpDy5WzhrYJCJlXab+wclcz96a2cM68  
/NKFN5uYHMNPqfOXbMGoXj6tw+MXVnXQ3PNilS0snYzn5XqygfGxNV3vemUL  
jHYVqI5jA2PgSWTWpLaD30ZNU9vja9iExKEFRbwd9DMuh/fdWsHMZcJORuTa  
QbK/PfU3vhWsS37Y5lGdHXQkCrrwRQj+xenTjtcQPOziFr4q3t1rCRDX37/kc  
sAe+TbkbrQGLWKmul8LdU/ag43MxyfjSD4xkcqbipLM94L6LtilMzGM7FrIj  
TvH2QL1Z+oDz8DwWavv7SEmxPShcdZy00DeHObo+Szn2wR78tX5QcfbPYrLh  
xs5M5xxAtOj0XB7vDHY3qr5Az8sBDFIKC47Hf8V44zn609Mc4COEVB06PY3R  
EybvQj45ACHYs6C17QsWl6EzoTbmAPG42Fi+M1+wtcy71TFbDvBJ5UPV+J0p  
bKwgiOfXWUdwUlrateexExL3pvJmjrCHFOCSZfRBPaqTDEjKNARqLU05xMd  
x7GHVxt/5isdIXGBOHcg9zNGaLvyceK4E7za/1tH3eQT9vNvZGy+mh00N/3Y  
9k4cxmxUnfnPOzrB+7unV688/oiJP5X2fVriBA959zFsyn/Acnc4D0U8cYIg

AaOql4lD2D816gaJMSew79miqut/j/WTB3au8fwHPk29rw8kD2JKey23zFX+  
g5P5TBzHpgewW9gtXSb7/+DEDo4hRm8AC38emh1T/B98uLCQeUHhHcb85UJO  
NbMzMfK7azuI92JAvetO4nWGsMo88FXqwSJOhiq6SzhDxs8L3vnnu7EJF7sx  
HkNnEBkVuIrL6cKOpPTV/LZ3hie9r3ROP3uN6d3SSH7v5wxn/rAbSq2/wh50  
iwtfvOgMP5KuLaUGdWKz+2788bzmDKKlVOfdm15i3IJHejTuO4P0SGduCO1L  
LM3tb9B2tzMcHqdXQ/UdmNVMT4sPowulfn6uamXyHMuggUva3C5guFfu5k56  
hj0TanA6Ke4CrzTO1xKiyZioR8n+EX0XaLj5O7IL/wRzTGf92GDrAnX+b4i6  
KW1YTkVaZZaPCzg/V1/8fbUV+/vN30jvggvcfvy4c3qoGZOm+3JCqMgFcury  
Agr3mjB3Ycu1vUoXcPsu2BAh04T1eaoVNHw5gFmwcmV11WOs7PvBL8IHxAGX  
WpW6++0RNkSfUr+P0xV4AwZb72g+whhEN9MnRFzhjaZXcvudh1io94R4vq4r  
PLfi+IUUV4fdJZnthFi7wpHOH3Hb47XYWOWrfiMvV+Ca3Jep1luDac/XhNMS  
XeGag27l7otqLIZBUPdLviuoU/9M+t57H6sRK+B6escVDhba8x2fuIdx+iaS  
w1+5wqiOK6suZxW2sGB8YIbWDUZEausiZyownY35H3VH3aB8itPipVwFdmsn  
tT9e0A3I+PbYrIxyzJ61OZ9D3Q2yCGOB1Dq3sWYus5gZYzcQEKhvNL9/Czsq  
uOj40MkNOC6ZSSex38J65flPGcS5gV1QVmpn7zJMFgs9wHnRDfZY5Bjzg8qw  
ND2LxZkiN1DgJpa2Hb6BqdmT6hOa3OA92MboTV3HapJW1B+tUdYnyNsmRsUY  
Y0bGqURqdxDg2inFxRRhnrLCDIas7nAgtf/YyweF2Ik7Nu++SbqD+bHk0k8i  
BVhc7Vr9I1V3CA7SCdkNyMc+NV8qSDRwB7ne0xxbLVexrJ7nTlw+7tBZi248  
ds3DFofsNGYj3UFWZ2qa51kupjexcaqe4A6kl852Zfy5GPWq6JjhuTtYUs06  
ea5lY6HHsmOTJt2h62qxalHRFazvxOn/jjbdoUwrdrvDPtUxMXKxTg3vHHfY0  
ePcb3rmMfVXZYmjg9oCvflYXhwcuYqCdu5Qk5gEq8gYsV9cysJLzkgNGSh6w  
bfsq3YQ7A7NwcSn8bukBYttzLZPxJKzO929sg7sHMD3YmzVqIWLM4Vf/Sw7z  
AE29d4pz2wSsk/BGmCfbA46c7lgZvpKOKVTLPD7f6wGWUkVWSX9TsJzHPYU8

nz3gXz2nnphbCrZM9oibm/eAJ/QP6Ir6k7G7A0WaKfSeMNptOCbZmITRfD4r  
YnzME4S1GSqYpZMw55m3jLynPKHThP2VhkMixvmbbevCxxhif47daM9PjHY+FU  
JY9TTD0h8FFzU3lSHPaOQaHI2NkT/uSqrkxdi8Uu8Po6z8d7wpmleOoOK79HY  
tvrgMm+LJ+yaK8ZZ9eExEx8pBpE3nnD1e+kc7gAeu5OVISgzQlnPVHgxohEB  
mU9q2GhveUKPf+hj5/Ew7B7djVBjBi/IO1v35oN0GEYl9feSLZcX7DaRrAQy  
QrHquPr2AGUvULvFfDzVKATbV35oLFLfc466MokrNwVjNj1+m8m2XuCF881g  
EA7GaLmFTudHe4G+AjV9ilAg5tSUI0du8YKVRQ/9luq+WMPESk3XGy/wv8y5  
qePogzHSGb0ZHPECYrxQ30qSN9ZkQbs7u+UF234V0+ETnhhLnAvnKoM31F+p  
bh3k8MTcbz+V/cvldZ6YltSKtQfGuhbhdQjnDWwhxfRhP9wwT67BZK5z3tBV  
5E3wRm7YE5AqEbSjzGGhtJKowBXzuTL7TjHGGwRcuxJf2rpgHRLW0OdWb8h0  
qaT9qOyEcVrUW/h2e80Lk6dJ0mcdscDYQ0Hho94w0sfsVC7vgPF0v75N2vYG  
Ie7LLcvmdljoqiA5h9EHlgjB7FiQLdbFmfSphNsHhj9Orxrm2GDhXkoHH+J8  
YN9Z6ZW7y1ZYd2aeSNs5H/g5E9AcJWKF8TeuqHfaUebGA2b8LF6W2FuaKvxl  
jA+Y1Bz0vLJlJgnf4pqibv0BeKP4LhZPUyzuTcQ2U48PjHxGh9b6TLDBIYGj  
xz77QN6CJd2GqgmWiGXoi//1gd4I1gUwPo999Jx1k2PyBYka2aDfukaYRKZG  
AuLxBYvsiQs39Q2xT2Pbj8xUfOE1Metlgec5TirG+q2DgS+YnlU9qZ0sj6Wd  
rv/uae8LxU98Pzfd1sNkYvx4Y2N9gVfufdn8rg6WwTGWfrvNF5xt8gNb6LWw  
rczvT117fEHSMNhq2EET86Zb/3Xysy9wtx5RvdukGwn/YvAs2/aFgwI1P27H  
q2MN/uyl/zH6wdd7/KfD5wATmOH/yMftBzk95uZqNoBRvVfUua7sBzj6DsWD  
lxAWeE4zwUHFd1zo/nlCiWrYePv5Rh5bPwA1KdoLF1Wx1joP4eIoP/g4J9hX  
XY3Dijz6Qqa/ID/CymY2kARm6G9gaxe+wG32WTmuTQFzCz+Hp592A84o7dt  
FF7KY9L+7b05m36wONjgxG4th5V+7eUzp/OH8e1A08Kqs9hB+09WbMf8Qfjg  
zLEJ6rPYgv7PV1ny/qBephC/2SGD2bZv7xpr+8Nf3YC7IadlsC4lOsVDlv5w

gOZp8r9CaaxC5Pjdy+H+EBVWNyBEewZzpjUgZtT7A/UPNhePY6exvjirZ/ov  
/OG5xLciyzPimNqGy+8D7/3BfKrqwo6xGMb9NcqLuOYPLaeXONzvimAX7NJu  
6OwLAKs3YvdLxoWxPwNXhmnZAoD/TDrNRW5h7MPzO7ppMgHAmWx2HBXC  
NS  
epSoqR4AvSkPfAi/BbFHtU+b9pkGwGedq5eUjQSxrNIhkeTgAMiUG9oJZhDA  
zsXtO5BQGwC08rXiAkknsJb1g6D2LAC+BFLlRYTxYaJ+XFH/+gLgkY5BIzno  
OEZrJz0XsxwA438Ii+eTebDwARV+3G4AyNUvrisWcGPTero2Wwcdge3LM7Bp  
4MKeKzp1RUoGgueA1RN2Wk5MqtaHSlEtElolNm4rKHfg14UjLDYNAyHtjO1b  
6dBjWaz7pcpw/0BYdZS0bt46ismvt5BC7gcCfmJ/6S8TNqzX/MfAydZAWN84  
Y8r67DDm2sDLM9gVCKnVf5ZaZA5jmRGJD2RnAyHKdsTtlBArJvSxbnN6g4L/  
2G8p6x7C2hSmsdz9QVDuz3yQ7zwLNvdba3CdPwjOr8xWvg1lxhjs8DzlZ4Lg  
WNamsmQWE3a05a67BQoCi3KHstlGRkw9hvF3gz0lvmdhduwwA1b8r58Hnx8E  
eNy09gAHHSbtS00hXBEEEXDuXTgx60WKvnsrWfKwPAm/VnQf6T2mw9YSroDgQ  
BKwSQ667kfuxjMIXF75PBsHPkYM6i2P7MH74M1iwHAR5e4+sH+nsw+4kPZD9  
RxsMxx98SxQVpcZWpXWsLQ4GA0lWx/zCDSpM9ctEbPXRYPH5LeebIA8V9l6d  
tdNBMBj2TP/eZlbbRVT7w6yfQjCccWPfaKjYRg1THHsesGg+dZijziwhfLd  
yssCjIMhaltW//f+LSTx8sP8cadgsJdtTO6l/Y0iwwNZ8B7BoF/+5mnD803U  
IUR/ts8/GG4XzWbjmTaRbbpSXEjsMJRmVBCePdxA5fIDZR9TgsH1Zez8KvMG  
Wvnm0ymVEQx5Oy+8zwWsi4LONZbjwmDoXmBTf6m6hh7R75ZhjcEgEdlFZc+2  
gnaa8jsLngZD0nh0SLXQT6TnfWbh58tgaMIfDyiTWEaTXc5ny94HQxbtedNM  
80UkHr1l/Wc0GBLuNU2whP5AeLGcOJpPYGi2vqpeXLCAMDNedFKtBsNfMc+B  
ic05ZI1zWLD5EwyHd+Vv80nPoVsLGywP94LhJYVVVNB3pGQgbOPCEgJVawZf  
eva+IQ/mCwvtp0NARcXkQZhrV1TTk3Kv+WwIWDhQ+zm3TaPNjDjFWpUQuF7c  
dnOlaxoRGIIXSgxCQI04rf13dgr1dfncyzUPAcj9ZaxhOYWOkdx8M+xDgI7P

QbQnaxLdobNeiPQLAWnS6X8e0eNoudPkXmBYCNyZfLYgETuGFNLP+XrEhgDK  
Bv3s9M/o9X60YHYxBBx6Q0s46kfQHNWpBcn7ISDDc7runM9HJP2c755QfQj4  
vrpdKVX5AUUlcrytIWA/sGN4MylIXRgl2nhQE8IFO/3/7GV8R6ZPKW9tzcY  
AlM7baM3pwdRYdyez+ZoCASJyR3dxQaR2N+1+a8LlbBTtTTJxDSAQlsXq0bX  
QuCdvNwtbdQ71Bo96zOwHQJmeQ2jPB/60bk/I/NkxlAoONLZu97yFvn+ej5f  
JB4Kqu3t7QaLb9CjhtaQLNIQeFaqQCNw8A3aDmVwIeJCoFlg49YL8l3o4trd  
+fBzoTCmekl289orNPTwZpWfWSjo/jB/YjDSiXhDrvm42oWcliVVKvPxTIT9  
M3Pe2DcURvkapoSaXqCNGIKVTmgoME5104gcfIFUA1N81GJC4dsj6sR57w7U  
uxgxL54RCq8nIjtGph0tzTvM094LhUP/7Tx9u/MUKVRZVf17GApyyMQ+6t8T  
lOBt4rPeEgqkbN/V+v1PEMt3zfmpN6EQ32df0CTeiqzuqFUND1D02USsMp1r  
QaUeij59IxScJzy8EdyMpGbE59vmKdjwt0jJUCPC3xaqerQaCnb570pzrI2I  
7MrnU7UVCuttoV1T5o+R8Zfd8/kMYdDBx9C7uliPgif+zIWihQGRw+DLmvtD  
ZjiTLvNF0GwAhZhPjdQhUR22GBOIMBA/VPz1pHkdmnpwmumMbhh8GblKsiyv  
QU9cms1Lz4fBrvTOIYDaB6iQXbvkoFUYaFhzlkFHNTKjd5JcdA8Dmkucd8V3  
7yEJmR8R9v5h8H3YgqZH+B468C2S3B0WBk0B6wrKvIXouWG2cVVKGMwtyh25  
0nUXSfO+DPEsC4OMp6n3WdfKEfM7k9YPd8OAFxMUemZYjuZSx/dp14aB709T  
FdX3bqOyH5u5guQweEfHdqEp4haKu5E6ltMZBufGRkwzp28iG3PWU/vehoHk  
TPvSMYubiLVNrHHqcxgcJdb61mmVocXAxl3jr2HAASJuvwg3UJeApu6zBYof  
Qxdr+i+VoqQMh0/Xt8JAR5LFmFRbglZsr2zbcYTDw4aG71vnilDvQV7Nbr5w  
mFXzDahKKUSV7ZUXIYXDIUHFfrn+eQFyFuvG5ZQPh3WxrFPcxvlldfy8B1E1  
HMY9ynfyb1xFnNmFH2xqhoNWdd7RBxt56N2fdFTBLBxyUrZEI2pzUXV1MIHL  
Lhx4BlfPK7DnIplzy7t6l3AoNhv45J6Yg6BLxCUnOBzMxIXcZlyyUV2BXapx  
Zjg85bN7wt2UiS4ZfO8hXw0Hcso3J82uy8h7L+yo1PVw2LRu3tibuoT4vS5X



MFeHQ834yhUu0YvoHzf3cmx9OFANyk3NWWagT313FH60hoPEs7gW6YwLKEvh  
+es3b8KhlelDCQstCfkvGLIqD4TDXOFNag4DItlrHbGp/BQOnhtLH8byCYiK  
bn2e8D0cNqRbubqwdBT04RSzFm0EHK0/2lg8kIjsZDK+XmaOgJED84M02ikl  
Li+3Dh+JAA6SyMbTJ8mIVbvJx08gAvgfcIX+15yE6hr0XudgEVAVdgs5Nsaj  
QtYHpWM6EXCL7of28+E4lOR/GC98PgL6r06zd0/GilOhUaFWWhwgQFUxcKnSK  
QWu5filfoiNg88uLrBKfSDT6s9/2dHIEuBkziOxvw6MOAzmZCFIE9JZG1c8c  
xqPc/TuTBwoi4NEh2XGr/nAU959Lk1lpBOi/vpdNkA9H7m2dmSUVESBy+Z5v  
UFkYkgvLVJNuiB7QsXN91JDEW//2tGYtgjwFXiqVfl3BNGctl580REBVw51  
CKZHhqAP0yeuWQ9EgKNywUpsTDDcmz38k7AcAYW4vXp6hwDkVMP+rutXBITU  
ZlW4kPyRDmPMXbadCHjgV1tW1eaHODO0rO4w4SHJPOENUvBFVHx3JVfY8EDW  
oSUcjvdBc9FMtDhuPLw6Olm08sYbNcsM1b8VxcOZQa34uXAvVHZZ6SKHNB4U  
Mh7cvTjoiUjzJa4uinhQqhGYNjb3RDY3PQ7/0sZDdM8PcRMGD7TF+juQ1w0P  
+v3VS3zfXdG0v72Opy8e2l0f+jf6uKLurmfH60LwsPtgijV1xQUVJ5F6NZPw  
YGgYGcHL6lJSxhZvXybioeUK7lJRiTpyVTKNHc7EQ57fVHi1rDPCrXCJ+13H  
Q34xx8DcgBMSMEygflyOBwbiaG79YSfEWDn9afc+Ht54DJr7WTuiz//dJ+a0  
4uFK2zsht3V7FNev+q1lGA/sph0Nbh62yAW3z+bWJB52ONJWNdttkE7F6+6M  
73hINXwp8kfABh2ONauz/40H4qUrn3Y3rdDmNw5BrT08SP+3L3Ha2wqNmYxf  
laCPhDzJF/gnk5bojrB37M6xSGA33H0Y8dkCXcyWXP7GFwlKbs4nZ/+zQMH/  
1pz7hCPBhmZKOWjOHOEG43VuKERCcyg9eYnGHPXH5x5Wt4qEoytnX7z2MEUN  
czZpYk6RUCoul8xMZ4qKzfl+H/aMhOMhnucaqkyQu1jV2HREJNBkpzeE/TJG  
+nmBxj3xkVBlm8r3xNgYSe2d7ahPp8QTC61nas+jP0Pku2lXIyHahXllKckl  
jWNp3AHXI4G1YfG0w6oh6rinf9mylhLutnz/+cLTEF1OGgoVfhwjXqdl3hT9  
Z4AEJBbUuoYigVOqN1giVR/RF9TW1Y1FwvIBidTP7PpokTpCsGgmEtpdFI8T

qvVQ0/DeAd+NSEiQanRT+6aLSjQ6Y83+RQJj2NhbaqluSnmQsYyjiYKGj0dU  
ZCR0kWEq+xDT0SjoLOEphiQdJLM8qrPBEwWN/aX6n6R00DHbspYxwSjY7iiM  
PDelj5Inb7x4GwU3L5o1S1poI3wo+BrbB4FbIfj9TRqWshem25c0T4KxryF  
6dd3NRHU9Rjzu0VBeCyJVfaFJmliWMMvvhkYB7m1krZaZJlpZ4akciYmCi4xC  
Mf08muj/RfujpQoGN2l90ie10BlMv5UuTlR8OrAY1pJkgZKL5EJiy2Ogije  
6yuH7TSQL/3vb263osD967bHJUkNJDee3CP3KAr4iZZ2M5/U0RtSqf7HAQpf  
JmXTbKSONOZ+ZiuOREF50defG7zq6Imu3uXCqSgI3FFh4vwHqIZuK9XuZxQc  
iNquM3kCSMTTNLFtMwpK7k4rwnVAZZ1VMby7UfBETXJ3KgFQTppdyARzNHDK  
Mtza0gLENPPIHzaDaHPbtG7iwFK02TyLu0JhmrvyDs1LIDw+544uYpHA2+U  
jWhOE4bsko4bzupGA58uvqR8F6H3kxG6usbRsF6kr/TvPUKGWJ9GpVU0PB75  
a33nHkJ0N0HZ1yMa8mMenm6zR0ggbkp4OSUajtuMXTx71NC1z0oCxhnRcHbl  
g01AlRo6qpJ9vC47GspeMczyX1BDdNvqR0PLouGnj2KC6jk1tBB5m3rzaTR8  
lTplE/JfBkn//1n1RkNVDK/9jLIqmhmweJPU280rLrVDl2vUEV9v2h+Rn+O  
huljYb4FeFWka+m4MDodDWIbWk6hzqroecPjbyoL0TD0JHtGykAVPQrzHNv5  
Ew2z3RIs8oKq6PR78rATVQzkB2jOhLKqonJZjvfP6GNAqdHjUcyuCspff0m  
+VgMzK87lrwbU0GHTPk7p4/HAKbzb4HtrQoi1UU91zwVA5xbCgX0ZBUUEyTW  
RCsXA19xbIErN1XQel/yI0+VGOATie35lKeC/KVGH7zWiAE/qcOL9iQV5LSU  
UX7BNAaOFI+F8oaooGHDrzcWbGjgKUPk83lPFWRSrXLNwDkGfuq/LKF1UEEa  
fovZB4Ni4GgT39ycngppq69a6HliPgYsia/0MoIlkxK+T+uNj4P2CxtsCRRUk  
PG+UmH0pBpKWiS+/iqigG3p3YtZyKfpWs3nz+VUQZ+VuhPk1Cp8eLZ1SLhXE  
6FXrz34vBmYz3nUXMqugpA/e+9kfxcd0++e2e7QqaFNTToPhoawyov6//ULOH  
Q9P8V18f6Y6BqMdH17vXcah1NEaAbSEGRPS+2Yh04JC0vlzL4bUY+MRKOMw0  
gkN3mpaMD2/HQGEN3yzdEA7l5DnHszLGQvf3D0SZbhzyPa/ziUU8Fkba75Tc

acShqSd7gSyysRCru1d15yEOWZ1uoWXBxcldI9anmdU4pHFA4uzBc7Fw9V3t  
f7s3cagZ/+0Ns1ksfNKdK48uwSGpb6XOzHaxcENO0v5lPg5xdxzOZPKNhVY3  
aUJtBg5lSfcIMYXGwsWywjrNNByiu5HWxhgTCxO6Lk2Z8Ti0Fvt7jiEjFvb1  
eHVKB+GQ90JdlkNOLJjdNE6J9cKhCRvfYwzFscA3/IPg/h8OdcuPax64Fwvi  
VlcH/xjhEJTnj9I/ioXZIsP+Ai0camQzCaFvjQUeWebEJzgcuvWzo5SuOxYW  
Lf64JpzCIU6nOHm6wVigGe0zPMSNQ5m98r20o7GQU0lteZAFh2KqKrdoFijr  
HO9OK20ooxU01yyatVjwfsheZzOrjDwJPCI027GgmsFEfjusjMzcMi32M8aB  
9KL9dEmzMuoa0P2xjy003gY51yzcVUYIqFP2ccfBR2GfoPB8ZSR+PLyWWjwO  
RIU+qwiGKK0yi5I61LJx8NN9+Z+Kozl6tj07RoWLg+N9tnxRespo37AtI9W5  
OLjPcnlJnVcZRWkfublnGgcXpnZNxtAoo+X6XsU92zjo7udNMI5UQqNZmMeu  
TxyE/q2rDmpWQIZ7f/7uhMSBlezAf79LINCrgEc5O9FxUBy7qh+SpIQenTv1  
/N+FOMDhCFKCWkroIg0Tz9+qOGjhNhR9/1QRsfCUwleHccDCInpluUgRZcII  
eta2xEGjqGzNx3BFIOdk/NDtDSWfMdv7X8KKqKQ5V7d3Lg44XvT+6l1VQHz9  
QgF3VuLAW3RG976RAir79jgn6U8c7Nut/iTCp4Aq2D6Nyx2Ih1uSuVYzrfKo  
xp83/LpIPPhyGIIdf+CqHpFMfFEWeiYdcBdbUvHty6FERemaqGA/ZhJVkzWA5  
1PTKmZFONx4WtzPn3v4+i57zV5QFesbDwhKn/8XfsmhwSPItVhEPz9tZToe3  
SCOLH+Q1rgfx4Oa4+W7WTxp9pDbh3GiIhzJhceVDx6XRZ6lQt8qX8ZBPTVtH  
9VsKzZAat1hn4iGQq/BAq6kE2ITFhKcFEkDuyIRsboYwijj/Z/BEPAGUcEc/  
bnaeQts+LiH5sgnwV1Fj9emuENrLT31yTiMBCFUV0RHegujA6muzepcE8P4o  
rxrHy4+4K0wS08oSKPP0g/u/mdmQdF245PDdBEihMfjN2FFOm2Fn8VqE8Ck  
4vNVheMHUejAlGL/U0q8/Rax+S8t6t4JXuH6nACQ4Zg3J7qkFmOV7VLLngjv  
tsd8JYboyZ/pBzVHMxIhiweGXJhEyGtSm6sSOYnQFXdma0ZEIHyAj7sssSgR  
Lv19qq6iLUaWk3P9J1SZCDRXIVSPpZwmX3JeawjqTIRs2iOeqtTS5FIHhtx9

VEkwZPyH+iVBjnz+sRhNIS4J/G6Pcb1yVyPbaCxWZqEkyHi9oli+pUZ26a8x  
uqCRBA/CrO+WXEbk8PmzBTHnkuBFbU5Z9SOMXHwciTvaJYGn6y7Nzm8gz6ab  
mQjEJMGBBSzb55gmeYWN/Rd3QhLslff6jVtpkrduDBcdSUKCc9zPtoR8TTJz  
q8NXmowkWOCSsDzRIssu+yj/16UBA/rtY0fUWuTVWPFekauJ8EZ/ROOCzht  
svaBxWefbiaBEg0tPX+YNtlGIIShuyoJyKzSGv5T2uQEq9iS6pYkWBNUQ99  
oEMmfVTr3iaBKuvf2ktj+uQs4OpZq+3J8F2T/6NEWZdcnlG+pkrb5Kg4t7N  
yXRPXXINh94Q8W0ShDpzLUll65KbyhmjkwasoEQiu96iVZfcTb7SETKSBEK  
krZZej3yklGZl+84Rf9/6JSKhB55/NNRZrcvSfC392/B2Hk98qzHcJ39tySY  
2vgs8ixlj7yyVmRpMZ8EdS+/zX3M1CNvjzpsGy4lwaYY/0+Oaj3y/oMnbmiv  
JoEGW855/Gs9MnPxFO30Kwmk/TR4Zqf0yMdeyucUtpLATkDJx/6PHpm/wfPy  
mZ0kMDoVY9h9UJ8spi4mK0qdDMUuh0aET+qTZft+fOSnTYbPL3cFPGT1yar2  
NbFcDmlQqWqMotX1yTpzwxfsB5Mhp5Eesz6vTzaOONvJeDgZTvOfUV630Sfb  
7Nv02c+eDAxeVaDuok92vdLM8o8zGTqjZn3kvfTJ/ryx9Ru8ybCikdb1wlef  
HFGlZrPEnwX89dXBU3765AQFqp1vQskw0+iJT6Ssk1503JwQTYRIZalPE99  
co5Jus6wRDJcOXN/4aizPrkXPdHvzSff6Jm8rqVPvmOL2NW11wyZHFd6BQy  
0CfX/u6Va1dKBsYfKT0lqvrkfXufjuNVk4Hm3Tf6yxL6ZCu6b3SnIRnMjHTb  
Gbj1yVUHV390aiYDG8e6NgOtPvnf0Z1PebrJYP1FbiZ5SY9sWSvQoW+QDLL0  
Ngs+7/XItwXZ7++eT4aXulV3mhr1yJviJ/PqzZJBwDDMy6VAj3xOVjLe2yoZ  
LE/ui3WM0COXKit7HrdLhoTYm2dumeiRV0HbeNAxGcgs19+fEtMja+mZKhFd  
kkHoCjye2NUIFxo7nlT1SibGumGBFwO65EUrH8ZVb4pekRrfNzd1yZhTxHqF  
fzJs3D30+XugLnnW/3LnofBkkLh6K1CHSpeMCy+qeRmZDIq+flJhL3Xil2Mr  
CqJjk4Gda9k4012HLJfx1OdrSij4DBmvxuxqk4nZb8wKCclwTP/VwbON2uTR  
wg8qRhNJMot1qvOxrzY5+e7SwabsZBAN71XbeKNFHqrZ2vS7mgxjb+5fKwnX

Ios20k7xFyXDatGtt3M8WuS+I8cfZZQlw9EY2u/azppk3mkjK6dait4f3xP3  
P1MnB8/bYkfqk6HkdTdlm5E6+cWKh2hXYzK8IQvMdH0Csu9e/LYMORmGrrcr  
JL/GyM28NaW0b50hPKH1C3upCtncmuV79UlypHGM7/hGy5LvOHG/c110BrtQ  
S/f2czLkbQ/hlmNrySAipHcyhEeaXBaOLiZtJYMJRnS+EH2avJwdeMbiQAok  
j+ipinEjkDWKYjgZmFNAPCjpdEDBCfLVMg1+VAKHHXa4bak5yGr1pa+F+FI  
geb4nHdTh9nIGb19kX9PpUAS/lhYaM3AUwf7izV7YpT1r2yPeSrm1aQWdL/t  
l0qBEkLyqdOx02qD901mzAopoBPZJWjlx4LK8+MvsOJSQDO/7037ZzaEP4V7  
fhSlwJjaYqu08THERVkveVwnBW4nMr4dzOJFiwNB7ifPpUD5jTN1bjYnENIZ  
4tqp8ymU90puEPMKP8r60TcgZkbhv48rHnEJINeEigNSVilg9oUmv0hSEMkd  
dMVk7VJAqsz+QI2UEKIr4cMrOKXAgayTAsx8p1BVS8FX5JkCbbrMabNvhVGM  
ngW3pm8KSD9S9k7NFkGGw6ymuoEpQJ/7/fR9fVG0snGBbIxPgbB/Hy6MXRdD  
StJxRc6EFCgyw4teoZZAXXecjVPuUPxB7JLvDaRRsfxxAuFeCsh9bczqyJG  
/i9HnmTUpECGg/4eywdpxDptJp7bmAKMhtwX0hxkkPVxbdryVynQn+8k8CBI  
FolWU6tWdqArW103fVGWbSNI4dW96VA75Kiy9quLCq1UZxq+JgCLw/GNPbk  
nUWzuWJtnbMUfh0veey75VCzwOzqm4UUaKqbm9E/Jo8yHt4S7VtOgV0NoroJ  
Z3kk1c+T/3EzBZYUZ0YDVuQRldOn3tHtFHh6ac+8Qk4BDS7m7Z/cTYGvPt21  
WxEKCM/IEvKdLhUIN4WKg5cVkf5R990fjKlweplluU9IEXGLEid+sqRC9F2n  
2nYrRbTYqMm+wZYKaTrtz2dTFRFZm8rzw7FUcNGaoRm7T3lvDT1J+cedCkLc  
EU5YnyJydYtuoTqRCik7Ny7G/1BEcmvyKzSCqaBopVJQTKeEaJPXhBLEUuGx  
qITw8gklNPGVu2JbPBW0s/B9bIpKqFFHU3BRKhU6tZjfEQyVUGaV381x2VT4  
Z3nK4LyzEvJkzjvRr5AK1e+3/gsiVUIo6Mn157hUyH/bLjWXooSODc7wPEKp  
EGv+eLgjWwktyx0svq2RCrwRzLHUNyivywJ5zqs6qaCqsadUeU8JIW475hPO  
pUJxd6dMW4MSwjsSjkadT4Wt44Xp6KkSOv+8JsfHLBW4DGssFF4qIWHBYVZ7

q1R46g7P7rxRQrvpe5mGdqIQEUn4lvtWCX2cEzmInFLhL7FrhOudEqoxMLl4  
xjUVNGrH2TcGlBChJorhpGcqNJ25sOr2Xgk5Hb5JZPOl6LNquXNhSAkphL+h  
pQlMhYZQh6D0D0qIZXg19VdIKiS+c06P/KiEZpW5932PSAUqcoNA0rASlpdo  
JH2KToURkk7ys09KKH/Pd/dNfCrcS6D5bDmqhAjdC+PaklOBY2nMx21MCel0  
tm1Xp6dC+0my14FJjcQnOhNveIEVzvnms3hMK6HNDObfVy6ngvlRi8KiWSXU  
tyQXkZydCgkB39CrH0rojonjeuJVVAh8oaTKtKaEEurTQ9yLUuGFm2o3aUsJ  
WR2r+Wl5PRXcn5iMW+xTRnRjuz+UKij1Gh5IEWBXRhNlxFe8iuLPjoPRMz5l  
1HjTeI7nQSqwJ6um4kUp84tX2cxuA4V/inMqh6oyerWmPv7yZSqkNh45Zu+m  
jEotfe0buyj9QscVty9AGeGbc0bu9qbC5ziNtQy8MhJO+PohYygVLrzwRG4  
oIwIDOl9JjMU/K+Uvv2+MnLyf2CoMZcKX3+YtPXXKyOF/g/dZxdT4SzD20uF  
bcpoNk/49bGNVLjLyojX6FZG5N/ntQ/8SQVdXpTGOaCM8u0iX2z9TYX3hQLX  
cyjzLQ5/170x/WlwW+TrZ4evyogvdUWtjz4N30xl/9ycU0ab3zifPGNKA1pN  
TuaIJWXUp6eOe3goDXSC+nLerSqjO/d9mm8dSYNvwZn0tb+UUQJLjkleRsrc  
+JT9jXFLGvmFtDak86SBjCjb5cRfZSQ1NC0beSINfjlx3dPcVUb0ikwPvQXT  
wFfVkj+YCodEj8aHHRNJg6XJQgX9fTh0bnVZ/qV4Gkgy5zRt7cch/z7nPyFS  
lPhLGV7ptJT58v5g6wnZNGCR6mVcocOhOpJW/Fv5NNBqK/NQO4BDgx6NWKxy  
GjhTmamGMODQMf7ilx8hDUK/hAReY8IhpR0mYppWGuweDTcrYsYhu9F4fVm9  
NCg8E/Pi0kEcKs1z6btsnAaC+i2ObodwSJhB7JOWUxpsyDAHKRzBlb3Z4u11  
lzSo/J54XO4oZf5/wexY5pEGticjb0iw41BN/MqXv/5pkGDyEX+EA4cU1pp+  
PIpNg8jFW1/GKf0x9medPf6iNGDI6ufKFsQhz+bm9r6SNLh2IsJvTAiHSFF  
0+LKKLi/u0NKGId6jVkyPt2l1KOoy+mNKA4tSyT1pN9Pg9LZx4dYxXGIlXHt  
8tlaij64YWB6GocsXn5gu9KYBvf94rHnkjiEv6n7QbU1DVJmd9wXpXCoMKGl  
YOFpGkQ9z145JI1DY0rXeXU60+DWDCM7ThaHdtkPTa53pYHep1ge7Cw08a8n

3bzZmwar8RxuSnI45P7AXXjnfRpIyc5m0SjgECHj49y94TSQXyif+UDBIV56  
920+p4HA3QqLQkUcWjwpId0wnQbDhemBm0o4xLJ3fc1lNg0CvbIHCpVxSHrs  
00NDC2nw88Sy1lkcDoXnryv7rabBx/nX70xUcCg/zOMf5680GOyyFxyi4GaT  
YfKrP2nwVSJw21gVh0Yl9ZPD/6XB+zjGsJcU/I+xTVOAKh38T6jek1HDlb45  
Cbp3+9MhJpblaQEFQ2dpVzx9OnT9vtS1ScGut1gvnmZKh5N/O+bPIxxKTUwx  
GmFJB+PFNRUyCqZhY858y0f5vi+irB6j6C2/2tcuLQ6PYrrU1LD/90fzBFk2  
HXRnCaZ9lO9fB4wutymkg97uEWstCvYe/LfbjEsHzzV1pluUfAcUTxxqROlg  
tjYtvkDhW3lN/US9Rjo8lXwTeoKC9ancz9TppIP10KsbWhS9GW8qje+dT4ej  
k6YlPhS/xKV6/rtrlg6SoinfAil+9uQsBZVbpUOgzRH6lIrfzA6yWaVO6XD5  
V+krX3kcqn5uUXbNNR1629Um/Cj1MzoVWVfomQ7t+PT2UEp9M5fb3uUEpk00  
rc1EiQwOSZlPTF0JTYd3s8TsTkp/9DdRrV7CpwORp2r/3hkcCuYVpM6ISQcf  
kcxVAwpmTdY+TExIB2EcA2ctpb/qvnmdTEtJh6DUxbOnKdjkXIZMMiEdfsky  
7ntB6ceVmmr1hAxKfjQcFk3B2Uf6TWMz0yEuVa3ShIIHx46ERuSng3qV3GoA  
BbPdsckJkk2HnpPJL6Qp+z1ijL3lfysdLlbkOlcp2Dzo+iOfO+lw07eBtpbC  
Z+P9sw7Pe+ngenRQR43CP09petCtJh30qZ1Ldyn65K7TfHV+IA50LtlvYin6  
P1CLrDs2psM5N/ZweYpfeE/9/fat6fBa8UuAFMXPYz1+R2zl6XCaxTPg//43  
nskUtOxIB/Fj+DPzlPpY59WdNXuVDMGJX4PrKPx+82dQ07g7HZjqk5bb1Snn  
zfGXuWfOITKnfDg16bcPx0c7vqDFD8ms7P79HBoRBgXrvMxHUzv35PuN8Sh  
mlsOaZqj6eD3SmVPyBShuFcS8mAiHTacOV0HLXGo1eJmudp0OpTe08T32Q6H  
7FteNOBm04Hr/eZ3cMahkpQDH+SW00EncbTsjD80qX4X/yazlg62rrEM5FAC  
Gjcw+iW1mQ77v5r3NERTzgd7DrvYbjoMxW4YzZJwiBzdcEp4HwGc1p1Jwtk4  
5DTxUV6QjgDw2ujQaBE03bjLY3WchQADGqu/Kqop/Ukg3vt4mADc0donjzZS  
zq/H+u4VdgK4eQnLrjyj3JeCPXf3HSeAuYbI8vYQDsnuU/zXxk8AoeIjLFJT

OHT8yy2TCCECMCWd2hn+gUNrpTFb308Tg LHPTLaIRgWNxc8a3TxDgOdluKWG  
wyrolYPZLbuzlPhPU84mJ1TQNW5xg7c4yv4G1A6HVFWQVv5IySN9Anyo537/  
I1YFSUVor/oZEeDyq9dJ6LIK4rJ4qH3KlAAjMx9N+W6ooOXDF5YLbAhwQAE+  
lrxUQZ9WNjRMHQgw+6VaW/eTCurody5gdCaA/sUyk/xFFVRwWQnivQhwpUv9  
oTKHKkrxL89T8CNA4AfqF0WSqsjfgHX+ZyABng0EzD3WUkXAMJftiidAS0bg  
rHKEklpIK/iqm07Jf439z9EpVTTktl+J+gIBjncormz9U0XPNIIutV4iQHeb  
8eIbbjWUR6UrL5lHgLM8BG8NWzWUMPnowmwBAea2Gss3o9WQN5lv4sY1Aqxf  
3+f44JoaUovbJLDdJgC96KFW5Wk1JGrv+rnnDgGYiNPcPPQIseH6zqTfI4DR  
9V9BxyQRmv1d8en3QwLc+bIXGBqHUFaYpfj4cwJ4e91lcBfDUIxZe0L+SwI4  
88VatlhjyF1G8r1xFwEuBX9KtyZiSPknTVxHPwESP1kwExYwNO3b8PbuBAH4  
793/d9cZUK8+v4DLNKV/1NVs9eIBNYlewnPPEuB3gVJZeTGgS7NuJy4vEWDf  
TkjVytAgedcJlaH/CBC30fN2zE4dCbP/YOailsLR+JNZO3Hq6FhXR+Wz/USo  
+u0YOH9DHW1Khk4xMxFhepbjsuScOmreemd8l4sIeVXuLQ0pGqiyuvKH0XEi  
APnV89j7GqjovyTiBj8RNplFqYU+aKCYzjPP1EWJYB4Xrij4WhOpZmdKjSkQ  
4Xspwz+xaU0koeXZnYIjQnQiTkaPTQsd/63mKYalChg65YmjphbadVi6jtcm  
Aq/p7NfoSi30XNTw4GELIrQO9n5+kaCNTj4zLGqHEMFe83kpg5Mukgv7QlwM  
J4LQ9HLtWKkuOiXclpgrQTDBqDGTioiukve9lOJRHiz7EvtZ6eHNhH8JqQS  
4R49w3WmPD30fZUjV5JIBPKcNMJ166FP5T+lhjKIoOqrbe/4Tw91Wb/ujsmk  
5HOv8v0spo+aGW94nswHqmjts2luM31U9RS/r+sqEd4K/lBOCddHxcHnSwOL  
iFBZlDkbmaWPMgSFcezXiaAxz/yfa4U+ivm486GtjAg/Frq4Kh/pi98LH0Jc  
y4kwhz91ubZJH9mpPjjIUEmEJI/0M5P1+sjgZ1pV7X0irGcaRF6/o49Uzblo  
W9USgdgzOmpyRR9JWMP9+feICJfWr777L0Af8R5gjr/dSATNyck+adBHzG1f  
Oc+1EmHNk8dQnF4f/Qtoa1h5SoRJ1/vkR+16aIk/16SgnQhmMx03R4L10MR7



30W1TiYBQjsinDpoT6CBmmmiwjamq/5rrXpIrlt9DFXiLICzEN/LLRRbWL  
q89k3hGBtU93entVB2WZ3fydMEzpjwg260Pc0siMj8qLa5YIe6NP92op/+Dt  
NiSTQwsUf+9Zf1Sd0ETSuaw42mUK/wwt4yVPTcRy40TB1V9EcMyTpSuh9Fu8  
RtXm7BYRxvTU6y9yaKDF0JmpsR0i+AqRp5IfqSP7ppY3g9QkSFs8oxNpoY66  
V9Xru2hJcM/z+DX3XUDKEt0lZAYS2NscLNB4CKjS04zQcJAEvkn0k7u+gDhu  
jgbd00yCZ5nPBadFARE+u9qWsZNAznLlgeEjhn6x/9DI5yLBT7bM4h1Xynk1  
CZ04dJwEVe1nrw/8QWgw4y97ykkShPeeo24sQEi9M3Uv8hQJuEtt3D5jCNXt  
Mc0HijGg9ub0f6GraogPlzfoJkkCNY3A3PvVauhy008TWxkSlCwkFTeFqKF/  
NeUVxvIkGKEt0/wa1JDfvMQVbWUSLO2aXGWk3F+jgo+jVNRI8AG40h7tqCJ9  
JzVXGXUSXFBIkFv5oYqaCzsNRLRJQGtAe2F9RhWJvDeSP65PAs35sw5Lc6oo  
/+BHviNGlPxxV86x/FFFtHpOBxhMKfsHXl8hsKmh8JTZ1V0LEux+KVZOVVJD  
X58Eft6woeh9+3j0l5caMvu9+XLBgQR2ketHQkrVULtMYs2UMwn4rNZHS0fV  
kLQ/feFHdxL8m7l4JcaD0l07V5J7vUmw70rTXIsTQixfOPw6/EmgNNzK/fc2  
QouWoqgmAT/sZ28qSCIfusOpHyKBK4r3dMpQVjqLtb6XBxHAlenEv1OF1L  
uR9p27evJJGAeIX61NAchiox/Zn0NBI4lARmHGWh1DNm4G0siQQPJ+zYFwQp  
9WywbQq5RAK9c+w1mDyGx8tfyryySfBRHGDsqw7IXcw3wzGPBOcvnt0g6wJ6  
77YWZl5Igg5hhYIcCtYojXHULyFBoYruWRwAevhpnY5WRgJdkS81ojKA+I9c  
lJYvJ4FRnZ6R2nFAV4yOcj+uJEHHueGnYnSAdonX9p+sJslSywk/08YCugQ  
XDpWR4LfMxU6VjcwNPbv/kfmBhLQIB900wVDBopyz/c1k+CXgtHm+AkMtYY8  
qfrTRgLMlJ1fJaMIFc72xs28oOjjMpj5qosQ/Ullz9HXlHzd2PSlv2oIbz9u  
/K6HBFrKvJrbD9SQxbslgSfvKf3wwwquPJ7qrwlL9mSPiiREluzhfrnH2IWQ  
JCHZQ5YWoVS2kouLu5IkRVITSQtX85PK2qISoiRrSQipVO95/3w+33POzDzP  
zJwziRaf7YHiZCRaL9LG+JQGMas71a2GTVBr5NCi9XgahC8rOpwoMkGJSjXK

S5/TYM7c5Wysnwmay9yd6D2H9ZfQgKAJAIWaq1aLLOJ8GSr7fbwazy+LS++a  
fqB+Kvd+e9iCNSzv8Bo8woKuLaXR+qIEShbKjLoLQ8Fvsjzy/78SEJ2bWYM  
igAFMgmuvLp7JMR1Wvw/E2EKvLaeKRqgkVCd3qfpr6IUsAzVm+08REJHxmvI  
iiQpENe1yWrBjYTUC1LtXWUoIHxh3e4mREKfXDzieGQpQPkV/SFPi4QKeNWv  
3ZXHWCq7cFKZhHbX/34VokiBlvFH0zYokpBIVNcKWRUKBK0PLytUIaGnSpe0  
u9QoELZnNLRXj4QSeW/ts9hKgd5c363pViREolpk6OpSYPLM/voNHiQ0Zy5V  
98mAAgof7c1sIkgoopKkelJ0pBYB3gn/bBRKS86VY/DKjwC7v9ffCbpPQaymv  
Q1WWF0gEYptUJwnZnP7bIeZAgX0vLI9d/kNC//Re/Gx2okCOUPWVeTzv3h+/  
rHrMIQLHZ/hi8vF7XX2ndUrfXgrcHDw72rCXQJ94ZW5I7KOAYrTm17II/D6t  
n3hP9sP7XzcfpJAoN1R9clzgRSg2giqdWXj+VA5k7gSQoFy8abW6It4nurd  
F+IWTofjHzdJZURKJGqzeY7RIG62Igv/rfxe9piRcv9oxSoUoBF8UYCzS52  
z4bFUoB5/VjM0GMCVVSWbNwQT4Fb3yav/9eF5z3fmB3PT2097se9L8PvUdk1  
dvFjyRSg9f7ZTukn0Ou2deX6qRT037Rbz/0Dgainv/SMUijG+TZx/2JQDb6  
jTx5VAoER08mJo8S6N94lp49jQJaCu/DWscwHwW+vstMCvwiSfU9xfjwTr2s  
6jwKrGlcWB2N16vz8TT4FlDg6vLt7U3DmJ/6N5MSRRQQsnvz/NJ7ze9Uqczj  
YgqcsCn9yNuH+VE+bh1bSgGijfe/0ZeYnz77o2qVFDC9HffRuo1AT6hyl99V  
U4DzyngNfxOBEiymn1FrKPBY9Ll9An6PG/94uGx2lwKXC8+6Pcbv9ZlKmvpc  
HQWu3LvGM3MF87FmW6r7fxQwCdp52QnzL9vOVyvwmAKHQ6L0bp7Ffjzu/Vjf  
SoG/3Qq3d57E8U/Ekze+oMCeB8GdN8IldFr5732F1xSYajnr8N2PQHd8Ew0U  
ezE/Fxp9vmH9pwq4byoNUGCtyGfj/1wJpNx3RmPzEAV2T43FncXzjtca/lKV  
EQrE80Zc2GtLIPpOiuKWCZx/W/6jeFoSqJ26qlBtigKC3Z+exwKBVrRT12nM  
UOCV1x1FfjxvGf0JsTTnKXBw9GDndzyPHbKgi2ktUWD95xRnU4JApaelMrWX  
sT6jx7U+4Hn5ft2bX5crHWZ3tn/px/PdDv0Lf/UF0uFmRPiqt4YEaqi8tGAo

lg53ZJyalFH3+fFNh42l0sFp8frJJxhRkJdMkdamg6f6LuX7xv/PJ5UQE7l0  
UNauN1nC82F+QdknU4V0+Jmw3/os9udlr/p+pIy/5z18t0//8/+a6/1mW9Lh  
25w7KdGMQLBT291cMx12Gus4j+B5MZZ666WFTjqMrTD87WNFoOo2/R1WBulw  
5vq6l8M2BBrijvdtqbZwOL/XsB4K3E8jtdP1DO0gHsfldmrucCJRZb2pib5UO  
zpS//pUuBHq0yLnrYJcObzbd1xrF/P/SM9fb4ZgO9mGT95bc8DwW9ei6k0s6  
uHquUH3vTqCwSms1F7d0YE1GllA9CHR5/GnJTo90qB097PEP69mrZK+wyzsd  
Alr4wjW88Pzv23nBzTcdiH8i/ELeOB96X9D3hKQD/1jzsYcYf3V5Q/E8lA6N  
O/LdtmGsTN3D6x2dDjynyR0teL93W1/ivrh00IyZkEMYM3i9l31OpkNeUBOp  
GM+37ebvY30T0+FG/GfxRWyf+7Tvd78z6dAznsEyxpHUPxwZkJYOh/vaasOx  
v2V640HBOelQKHQz9RaO50Nk6McDTKxH2ZV1T/D8LF35xTs0Lx32pz8ReI3j  
P6s0syu8KB0+vjs+IT5adh/5HlESTq05nf5TuL5e/7CvH1UGebTX11xBvPp  
L/XT/MjNdIjMUxXnd8Z6u8Q3Hq1NB4PEBtV1mP+XmX+Mj91PB9WVSt2607De  
bQm1MQ3400m61RXn0/By68Q1Yf6Jnf+dcsB6m5+pPN6SDh7y2cdq7f//74d8  
qvGt6eD4j71gCes7Vpd25WRnOkh++/fVAeMni0Lyp1+kw8VV5Ztu2hHlk+/n  
UPjrdGjvV7dUwzhPerzYqzcdfpiHzd3B9fRG5U2w/UA62C6ffL4HYwmjR2qk  
oXTobYk7IYYxdc+lG9IT+HtEcn0nzi+BuPht898wf+bUlK8Yp+TtefDyRzro  
i98J2YHX/72vb37jXzosK6SET2Ns2raJp3BlBtBz/Ub2YvvH+0SfZvJnQObU  
iZu9GN+d/E0JX5UB3tn/Xh/E/s///OIYJpoBx75tdJfC8eoJ9YvulcwA+5PC  
xq8wjlr2m0rkwGOVxdOl2N+qtTvsgxIM2C6b5V2HubvM1HisXljBlyhJDgW  
YX63ONBlpZQy4j1S0rtmzH+QV+J7btUMWLXWflGL6zUU7x04pJUB6zobvV5h  
feUz7VWf62XAQNi7/lCsv1eB8edGwwzw3XR8aCPOl7wqletVRAZI7396aHEP  
fh80SB26gDLgMGMxexnm1QXt366RQaMbjWyEMT5vHNwZiHOJgM+XqzLsPUh  
UOefznH3pwywaLBe0AsgkJDIA2TtmgEZ229uGA4ikK18+QoD9wxQDZOvh9C

oGZ09py4TwYoKT3N/RhJIC7no/Zc/hkQku9/fNsRApH3+63+FpQBrf6PJ08c  
w/dLApnRGZEBFSXsFJNTBFRm1nB/cDgDxP+E+lklEUi/aN26imOY78AWgVO4  
f1c3LRSe05UBhza8aEnKIIDJiuoKC2oGCIVIH1jA/X9YvCBCl5YBm8PG+c7j  
+3WjYrqOAisD7s1vp0Xj91K+RfDdPwX4/AMzsW/rCZSTIt98vyoDZGdFuEN7  
CPSMIXy29GYGJB3jj5oYJNCqkl+27NoMmP1HnSjF911qS0/X0Qasl2DNxZEF  
AsXzZvdpdWaaJtqbNS5jgrhznzgz1Pc+AkVfKVqIKJih9/d/xM68yoGe1U6/D  
FhOUpx2x2N+fAeZi7/+sIjmgx3sdJM9NZkB2w/yUu5cJmr3Ov+MDXyZs3sD1  
yq7YBB1wT2zKNs+ECueK03FkUzQ9d08pYZ0JoW8nKEdtTVHMwW/PRu0ygsPr  
cSZmpyk6k+gzaOKSCQNwFRX0IFN0pcL017hPJvzk+xKyNssUDf5d0oeTmWBy  
8IPSvw+mKjCiY/IIIRNWkdJL7T6boinJEAt2SiY8kvQpZsybol9b3rpMpWdC  
6sLjzVsEyWjtrjsReeczwcfg9XkdXTLaVXq4dOZujvCJejZe00FGHnV7lz/X  
Z0KM56nuFylk5NNhvnOUkwnS3+yGWjLJKOyb+O++J5ngKbG1dyWeXw6t+OX8  
uj0TTG9GmThcw+9nyeGSZ88y4emdarsuajjKNqpxetSTCc7SMX2VjWSUjt2/  
uLE/EzISt7jNt5BRllfy0r33mTB5SKNqqYOM8hNcr1SNZQKF03Zsax8ZFdGI  
H9c+Z4Lg7Ulzrw9kdK1Y0fHyNOZXYEUeEzSMbj2dW2AtZsINzmHldTNkdLev  
3z7nVyZ4aS+oiS6QUcOX5kvpfzNhY8Dh2ZqfZNT8p2L+DDcV8v3i73H/JaNW  
Ucb2BD4qhOmV3V9egdCzTfGFx4WooDWYqXuJF6HX+gHfj4pQ4Uwox2dCAKF+  
awe7SAkqrPrw8mTPKoSG9uhfDJGmgr+1d+sBEYTGQmXn/NdTQbVv7lS+GJ7P  
4lfa7pOnwk9u9f5wCYTmqF8u7FGkQkxo7rpBSYSWLR2a2alCBfKH53GTUgix  
tBTn22hRQVImMe35GoREJ45amRhSoXjc6psYxlK/vM5vI6iwRU7nhChev17Y  
alobUeEGNTDnEj5fQV7TUt2CCj2WsZEPsX0VHak8ZRsqmNr8cYnA/mlaLE/J  
21MhoSAjuhT7r+c2Yr70iQpmTvfWhOP4jIM72ZKuVFgfsOZwhQ9CKK72y2p3  
KlQPE4+oXAhZpReAgCcVfu9ZdWYKz0v2BWdY3D5UuHy4LGxikYxcqsM/L/tr

gds2qzoZz+vuTW5mP4KosHwgml3/hYy8u02Zs6FUiAyUCM3G+vmPKE9+iaCC  
YefGCC6sb4TAAAn3oGBUsNxxQrn1BRkfWD473H6eCtYpY0EIrGcVpPjZ9c4oK  
kv18c8+byOiMC2us7SwV2EkPVjndIKN0/1MmLRQq8LMmNs9cJaOc6KAcDpUK  
TXTz0i0FZFSQt424zaJCSubuX3vPkXF9bci+fp4K28sS9u48SUZlDbwjpRep  
80LrbWLgEBnVDr2hFlylwoVt6wrLPcioY0vMx7N3qHAK+nOJiBIZrb9TesK0  
DvvDVHVOW4Prw7xP8nsDFTqzfSIL+clIyNPuxreFCmtEBm9exPVpn8FdSbyi  
QtlTsfa3laYoX8bAaraHCo9DxYuUL5iiz8VBg6X9VBDo2rlNMN0UURpaRdcM  
U4HSVmuRG2yKWr9mRX+boQKv6VL43fWma02JptXX5qmwkPal6SafKQrh7vm  
vYTtnQyUR3MmiH/j7r62f1Q4bCt0QbTVBNm4yKISkSzYKLV+46lIE9RSU8q/  
VzMLlOPvzX67iu8Ts74iUZ0sEPA90N2YjufTDiHiiX4W+AT/K1sVRaCVIxHh  
+iZZQP/+7qMKfp9arDF4udo+C5zefFddyGh/2Kb8psPZEHDEI9+/l1jJMYz  
p3/8IN6v3u29j2GMfHOUurSjskCNz0P5UpQx4ipP/VcQkwWpOUmGhSrGCPod  
A2PPzkHFnsXhtCwjxDHt26pZnAV7wgdv/LA2RFIXY0ReXMucX8NByTGyhij  
j+S3oxV4/12x2tiZbUia43Tzwa0sSMxs/MR1fhuKMGvRc2jKAouLPGTNEQMk  
Z3HDKGwwC4gLXbJv/PXRkSu0a0U+ZkHsnULfQzr6qJX789KtkSzYTnVtyvyj  
h6IfKdf//JIFA1TXBDu2Huqwyjel/MqCuXirlrb/dNEJ27PmZTLZILf7WPVH  
Lh30olRR0VE2G/JM1C2FqNpIRaCJe0Y+GxIFb/a4yGij7tZfj4xUsoGUERkw  
sEULqdkfsnlqkA0Dcb0lE2aaqNfRy2FsZzYYZle51JC3ICNX3d3KmdnQun7q  
YuSUPBIImElJkcrKhltTY8r1sAxra1HVLiJkN3vYlploBcihtNkRk9kl2eGT2  
i3S/Wif6c4qeNlbi88u/PyHTpNDp56LEno5sGJI4UvVq10rkrxIras2bA0B9  
JUN3X8UpK949H2uVA3XXr1ffOqDDued2+bqzTQ5k3Q0+cOqZDucJ79dgVbsc  
4BHiesfcpsZOXcmr8chBwz83n0t5tHjbNK8zdm2KwdORw4W776mz8mvFaN8  
98uBQ8XMw90/DDnUxx0bohJyQJ+cnrihg8wpijF5a50UA0qUsyeUCMSpUg3I

kU/JgR5arfHeCsRpp/zifpaaA1P6F72c08w4fE5qE5pZ2P5Geq9iCXASe1Jr  
PhfkWJ76GqXKAxaci+PmtsH1OeCxr918bsmaAwNBpUENOfDvsK+0spENR/Ql  
hT+IkwOJATaS3sdsOFX1L58GNOfAx30L2e9mbTijVD87v/YcSCOI9a/8Ysup  
TT5b5tuZA4aN1kauanac5NhyAd9nOSCjQLwoOmDHkfebbfXpzoG1vA+aTEbs  
OB4GSdu9+3PA+83jj7sGt3NU1K6Wew3kQNLAcFC2rD1nYUObONf7HKH6vIF4  
vNeeQ+cXb987nAPDnKEBuR57ju+ygfrekRxcZPvrkKUcONqzHukeYznAflQw  
6ObqwOnsL7Lf8zkHXKwfPtn3zIGT/7ylwn0qBzp7uL1A0JET2jIh5D6dAxER  
+/5tRY4c4zrhg7tncmD3DZ/rzw46cviqdTrc5nLgvgXbpz3Hkfp6ipuG23wO  
zHcxhNsqHTIXcuMydi3mgMOPsZtHHjhyDmUWfHFdyoGVQRutoziOHL0kIjgFX  
Xzng3tjZHHzbkSMSM1K5czkHkq+dVlpx3pEzECYgvPNvDnx60uI7FuHIqdiv  
Ge7CRYPaFq1ojo4jJ87NpdOZmwYmNo57dlccODbbozWdeWhQP1u1cvyEA2cN  
yst04qOBfsTQkXP/7Dkjeg1TOwRo+P0bU1gfbs+pUR1y3CFEA67Ivwlb/tv0  
SZTjue4oTIN5MwHx47/tOM7iW1Y7itCAc0LJwW091ofPMcJBjAa/Wz6o+svZ  
cqZ+RXXZS9BA9Mmt5JXcNpz6b4yt9II0eDtQgSx7rDiUkXvU7di0eNZRZCV9  
0ZKj8uzfDrv1NNhQE5EyJ2T0mW9WqraVo0HMi6NdR8PNOI/u2YrYytPg5Xj/  
y011phzfy9nPrBVxfGs/k19bG3G02Le1rJWxP9Unf7llGXCW099mWanQoGSq  
pvDroC7nfPRGZ0t1Grjd5GRzbNQ4laGWNyW0aXCZL9Ey1FKZY+hzQNRCiwYC  
dkEGYUPyHJ5dGVHmOjRo4Ut+aVq5htNte+M56NHgSpq7WOqMIKfI9JU2GNDA  
dPqtQI/f98Yo3R/ZZob4+0eb2rx1+MJVkJ1BxjSgn4vTOfmKGwnLmrkgggYn  
ldHI8iZRxNV1rlvWlAbIkMxm9FMKfT/9wu0nGdubTdsWlRlejemse9tjRgOh  
+6s6D76UR/3DfntrzWnwIjf3rFnRjtTfrHhHs6TBmWPJXR+vK6Emm+/7oqxp  
8Nf8+YZI2mZUu2Qy5GiL+WhL7bljr4pKK874q2+nQXbPrT3pfVtQvnfXCL8D  
jnf3hWNZHWUJSJ9YNSRBqG3zupvjNVASU0+k81ONFghDU7JZzVR9JHSgOUu

NFDRpt26F7IVhSjPfd3livVoTWrMUdBCXj3Gh7zcaDBwfx33+yot5JSWNGfs  
TgOPikDno6u1kQXRHi3tQYNFSghro4U2MpyS+PF9Lw3WrtXmuWOvjdQKvY6/  
9KLBaYX/fvOoaiM5l5Lf1fto0B+pOjDUo4XEuL+eytxPg1PPwnjXe2qhlbXb  
uML8aKD+70Bide1WtBh00tk2gAaf30ha0mY00WeZpzybg2iwrmisspEdCEw22  
iZ7jPkADI+3Vk7EKGuhFvIfgUAgN/HfVukbKq6OWrZczGsNocH5AYPNtcTVU  
QdPLiYukgXFAhNjqKRVUaBkv4X4l5wvX2xtSg5sRbeERU/8IDU7YXG5xfquM  
zpQKy4hHY755ftLufVBCcXt3n58+RoO0Vau8rH8rovBVhbKdsTT4ocETMKel  
iPY3jl0sP06Dn4biX+8lbEKuUdoK5+JpcHXZxzR7TgHZblq7EniKBn471jMP  
Zyog0qsmZYsEGmj8ijLycFVAmmcFSzcm0cDIWwao6XYFpIC75p9kGqSWX4yQ  
iVFAkpP5lf1naKC143nq8KAC4rvwaev9VBoMZTktsc9uQr8cNW+y0nD+rr6x  
3TFQEX39G613NJ0GcrI21NT9SmjoZmOtSyYNvvoM9ThEK6PX/nxGWlk0ECmo  
E3Ev2oyeSjnXrcrB3xmrN+z/qIKq44YanzCw3v9J+ew+r4Yuq6tBCYsGOfFm  
fndXaSDmwOHmpFwaLP1+9e4PRRPFw8qnpdohdosNjLrVf1sjayE1B5UXOFBq/C  
+Svk8XvAtD7SNaeEBv/S0hokn+gj7fB7ryOu0aCSfr3yU4YBkn5h17elAp+/  
4DlzTtAQfco90Ffx4iwaJJ78a5t8xRv36YQJHb90A2X7VcZ0zCb14Hqjle4cG  
GWnHBzyGSejjwQNusvdooGq2TzoQz98N/MEnvt2nwesYa3WbOQLVFAcWPaqn  
wfl9FTuhCBNUbhbwJLeBBrYZC5ceDJqgond+Uwc5NOiNu+YXZGmK2LG+EtBE  
gykBrUaJi6YoU3K/sVQzss+WxOFnk6Yo5cY+n4lHNJDVZ6y4uoWMTjh4n2l4  
jM8f3GtfnN+7h8Y9K3Ke4vU72qY64sgoOGXvi8A2rj9gz1r9NDLat9Fj0biD  
BlH50X+HzpKR2wN3udVdNNh00d81hN/P9nt2W3x8RoPArPxLMtvJCL7vCrnz  
ggbm9ldA2vJyCjbNYvSTYNw/4jbyiOmSPmpc79uDw24NQt6b0SZoj+G9keS  
B2kg+bB6jHTIBM132+W5f6CBV5eq7idtE/Q50paj/hHXr0xA7ssZAg0J2Yz8  
HaZBXeng6MPbB0q5ZiX0aoQGF89KTYycj1CnhaVO6Riup/ozEecsCPTovbl7

/ATm37nSrEeUQPUn4KTzZ4x38GqKYT1uSptdUZqiQVmj6L9vdSR0rYbc+uMr  
DR6W2Z7VySOhi06m0x3fcH1Yn7Q9Hk9CzM+EVNEsDWLFWMV3+JJQeiqJiP50  
g7h4cwphR0KJisa+dgs0qP4oFT6qS0KxHMNUuR802Fjj/9lAwlFem6rmlnC  
erHb88OESShwUb+75Rfmm5h7l/zHGHnS9ZbylmmwzTp+wHXWGO3U0pWP+EsD  
cqBA7s9xY2TXrm1lzkUHXTNTPvZHY4SCtcLWcNPhY2Kdsu17Y2TAvTVnciUd  
9r5S/KqBsXqhxt1GXjpcH1rvGYDXKxDqAzR+OnxztQoWnjBGMj1buIMF6UB6  
bS5sM2eMRI6obiFW0SFf5K6NNhcJ8YioOImspoNslaXYuDgj/SpXjh4WoYOb  
SNPYDIUSmrFWyr8rRofhxtQVKoiExj5uakqXoMPqq0pSN3eT00AphTEfKTP8  
f3LJ7XYECbXf2aDHv/b/eK+RRSEJNe2U83i3jg4aleXW3ndJ6N7X9advyNjh  
T8/yXuFnJFRNWVeSsoEOcQ7eFetGSahk89r2PRvpQF/9MtzhNwnl/yc9o7GJ  
Dg83Br4NESMQbd8aaS4lOqw7K69A+v//b/wpafpamQ7FIHgqBc8zp1kS/mUq  
dPDbvVVZ1JZABscmtUq20GH2WEnME3cCfXZr+n1JnQ5pnuSjkQACFRnktl7Q  
pEO5mMm/Tbhed0tFsnK16OBpumPY7hiBhOat/Bk6dAgX6Lz25gSBml7Jamfr  
0WFFsfRgTAKBYm7P/U43oIOZ0rS9bgqBNBltramGdHApkrwrmeqg4SNFrGRj  
OuzTtRvhSSNQrmus/2mCDllfHS+oUgkqQekfcKUDqJTw0UxGHNLbF4+hujA  
Z9VRv4jX35/93XoY6FAo/LS66hyBII92syIs6PDX09fi4lkCKd8q9w+1ooOr  
4x+TrmQC9eUkagfZ0KF5ts7XHPuXdWjPsq8d5jcwK+Yv9t/KRavN2x7r/8DE  
UjCGQL+0edkejni/SEpm8CEC3RQd8HdzooNFb6+4XBiBgr/VaLu40GFy9TaP  
E5gv2eeUZQdX0qjHRZv8iZQapYR29Idx2srnOPsTCDTsJEAMw86VNzX1G6y  
I9DcjlFtE086pKy7OR+E67Vsa8OyoTcdJNVjd7iZEmjfakabng8d8ir8rxVi  
/SS+hrK1f0mw3WtXulcugVo7IUDdH/O3rCbM0sT6VsnoqATSQdzp6dyBLVjf  
zOnlTcF0uCQmTB3B+fD54002DSF0MOfps5VXJNAlhwL2ujA66E+K5GxRIJCb  
xtGANeF0qEzI6pbeiPVdZa8jHkmH5LxN8cvyWN/PCn+ED9FBAkXdp40/x7T/



aBM4Qgfes28WHfF+zYpnbJ5oHI/7QQWXTQT6SLkawBVDh1sXbDdSsD126Emd  
5Vg63CUndc7hgchx+64/P47T4cFmbeu0zVhfNfX27/F0GDUNASTvRk/Aitxv  
p+jgFW5Zt0kN6zvxNuBLAh2sLr49L6tBIKXWap3xJDo8vm/SqbkV63nOu/39  
WTrouD1/loj5sTqgn9t/jg4h1zSP1uljPW2EAnsodHh97o74wjYCBfHd/9NF  
pcNIwdVRX4JA68ey2tuy6QBVfmMUzP+Lx0G5j2k4n1UW88oR1u+spG4jiw51  
qRJJDVivucDPf+7n0kFh/LVnqRWBSq3+a689Twf1AEOTOBsCeSvn5d68QAea  
kdu8OtZbgicqsOoi7g+XHTwebMf6fbLWLbuE+8kAibTZAev3SO5v8WU6bFAx  
DQ10xPoVf2+/VEyHjQ+i6qN3EGgyuT33wlWsb+/s351OBCps+O+Yczkdjr+v  
4/PA+eW2eH/Xyut0uCgzcTgZYy1GrcVgNc4f4F1tgbGgzk3dezdx/D7Tm6bw  
/pHOSgVaDR1qDNxWpmHMCS0VPVhLB+7CvVzSGOfxFf+1ukuH3JhNIWxs/2hx  
4Vf5+zj/859RBDF2gvyBpTp83khKbRT2d8sgq6P7AfZXL9CoDcez8gStvqqR  
Dgv76H7SGL+XppanPqSDqpVu8h57AjFczpwjHmG9qx0/3cX8RH5NiJF6TAep  
LyLNb3B/skuPD5p+Qocxl65Xk5jPv4+OWF5px/kj0N45h/kOMfL7J9hNh0V9  
Bp6CCWTx2nv60ys6KLXyvfMzI9CGwx6DjW/ocDqQelUd69dd4fzgcB8d+Dfv  
jy8xIRBZHsX2DdEhqbc31g7X19oHp0Dbw3S4pzMmOmeA9d2zbTd1BPfD3bGx  
V3D+lNE09c0ncH/pabeQw/mVrLVFUfyz7o9yvl/HtXG9diiJL3zB8XJtXOBo  
Yb15Zb+VfaPDqdiH5Qxcn1OXpd8nz9Khce7oRQbO36dIosv7Ox1K3/+IL1Yn  
0JV3qxsMF+jAuVEb0oLz/WScYKXYDzqc7Zc89wPX8541vPmfl+hw8tXpX2SM  
9Wq4KC2/MJ+i+8fycL0IOy/HFi7j+LjllwUxHv/yIzjuL65/hc13clQI5Lp/  
THGllwG7wlxEynC9NXS/fm+7mgHqvXPhqfg7O+pF1yZRBqz5LVy6Gu8/LNzZ  
8FuMAZvFI7bcwtix/GnlGwkGaJscUfbD9IVsHuXfkGIA1SjBUQ77u+ITh0KR  
ZsCv/Ku0jxgPJNTHBaxlgO79xaGbOD5a3S13GTkGDIvuHwjDfKjnn51aK8+A  
tmML9iG4flt07E1er8CAfrmdFyIxf0smK6o3KDOg2NiAi6FDIF+OC6+yJgPe

fv1TpYLR91eh8oXNWgyQL3H66471YyYs6ajqMGDwxt+IdCNcX1DkrW7AgMmX  
DU9+kAik/ejbbR1TBlidO6zbi/OhtfjRdj3EgD06p7avxvnjfyb3gz7g+CxD  
GszMMR/WZquMrBiw3Ewzz7UkkI6K5GVjG+xvyP000px/7XzjhoQdA2pFxsTf  
WOP8fjrIT3ZkgMYpz+NzOH/zyvyXkBP2x509PYfzW49imAUuDFhwPfb0Atd/  
Z6iQsoUrAwRONGz9/8/jgu3f11m6MaD09RmHW7heuDRqnK3dGRB08IZ9Mq6v  
/FWpozYeDhhjo7HbGtefwdTeeDtPBqRFjTN/YtzVuVXc3psBEtPd+oW4foOv  
ryh18GEAb8eAlx6uf66sN6Y7fbkwLzJveOf/P0+NLO928mfA4Wb+b5td8HnO  
p0JcAhkgOs1XnYjxiNhm5q4QBvx4njLBvZNABS87H7qHMwB+Dm/TxPgFPfrL  
3kMMSKwuGF3C63nc5GT2RTNgbHjXsifGhQYzVT4xD0Cqawvww/aM17RY+MZh  
nHgu3wDj7oXcXr8TDAi5H+cdhv092HMwMuAkAx68S1t5HMfDc8+MJ+g0A04G  
FA/54PgLcyXzgxMZoNl222o95sc4blw7JjkBO1KvJpZjPrs9HjwOPcOAAKna  
USHMdzgp2+tgKgNmpvofmeL+wbc+YDY8jQExlIVwMtav6Jfhuch0BsQFXNjd  
hfs58U5ow6FMBsTOP/Ivwf3j9YP3NYezcPx3nHbyk3F/KqixO5rDgBObNjz0  
8H0hcCr1fTSdAck3rSqUcL5d2ecZHcNkAH0g9W4f7hemSEsojo393Tj4yBXn  
b488d9HxPAZ0z+opUXH+Cw6Vd5wsYIDz1gxZM3w/X6vQ5z1WiPn1+qfWhu9X  
i2ONKKIAWGOwXvEZHE/EHp5a18JA/K1yDef4/feujeeX3ZfY0DLiVOVVqsl  
dPfsiLJTGQOCYV3wIV4CzRgs5alqBuyeLq4bXSIh6r+kl4bVDGjWva2oOUdC  
6u2rVmnfZMDnEp8vil/we3z/xtMbaxlQ9aLdRHaAhHopNoFcDQxoJTUSQvUk  
dMztxcWIRlyfi0e4S2+SkMRGz7czD3F8LjZh49dlyLE2wv7jIxwfNbXekU5C  
k6d/pPQ9ZoBNl+TRyHMklLo9qfHlUwaY7v93cOtJEnr4nqnT3MGAJR29hycD  
Sci7XD6svosBvR3njwU9SGjpaFlxzXMgnlkqmt/qQEJ6gg3Sxa8Y4Huuw9FA  
B88r+p+WU97h/rWw78DqBWNk+Tfc80QgA7i7k5eUR43RU0tiVPQHBigpt1Y8  
eW2M1vsIfQr8xIDU9/MSV2qMUVaabpv1FwYUIF7YlRlijDR2PeBGXxnAVKc4

t7oZo9YN1qaG3xjgmb32ehIYI+7bHjdUvjOAXbtva7C0MTo2mMDi/82AslCb  
krYHRkiiTPD5v2UGTCzyi7YUG6HqIwyBpb8MSO+ektXOMEIT/KXxE9xMmFP3  
a3DxMELees/82oSYkOVdd5z1xRBZnZPTyljPhLOXnecfzm9DfKIdFD85JkTq  
PEp2erMNTbKPjxrJM6HLTdvY/s425Hitp2BkExNkFIO/pBzdhnY9zlmF1Jiw  
WjPBZGDCAEntMDsgpcGEgUcTbTdaDFDP66/NnzWZsP+4gcrYJQPkOWJ/IlleH  
CRMrxmVj3AyQ/0reyRkjjxNKtaua2PIDNuWz0lMcFy67x8EEUfjUn4F100  
wXhad6hnnz4KU3y4x96MCbo7qFznV+qjw+bHnxTbMOHl46ixGXM9pNemqnjC  
jglBgW8yrorooXmXnlMu9kwg7dzrodqvi+J89bf92cGEnTWvaScidFFiwtdi  
991MMO+zrr1/RgdZ8Bf809zDhM069k3atjqIJ9vea+VeJjwXK9xuJaCD0gpL  
JW56M0FoZf5fL2FtlN3olyQYyITpT+N29U0ayMVabPBDEBNOsMxpek6a+Lbl  
GN89wIQnTwoSU+9rIPaA7Iz/QSb4D6dV0FLUUEHvNz4NR7AeGTmp47OqyDfl  
TD09mgmKHU7+36xUkeIqfenQGHze8iHaUaYKurY+p2vNCSaoR0jAf1s2o+sk  
e90oJLx+jSKhvFkRNcRy1inmMKGh9/CS4WNpRLa0lOgM0HYha1e9VQKcUQ6  
5eWZTOi8baQt2ySBmq72Ka3PY4LAdtd/cqr0eNX81slipiQk200aDy2SLa5  
FK8jdoUJvu38Gb8sv5Bbw7j1RUqYAGuFpY8+fUFuXyFmLFTGBC7f1evmDkw3  
PtPWsOC+yQSPC05ul8WFOc6/b1lx1eDvPqXCy7VinBdPjG3/3sb259rvSEZI  
crr32Tj+uscEuSdW/kkr1nHeZvi5zz1kgufXPwfc9ityhsZzw4afM4F7Vv6G  
j6s2x++2fMTQSya4+/fXnTinwxk+fTXq/SsmpG6XriVCdTkja25H979lgojM  
95eGRvqcSctnp7s/MIE9hHzm/xhywkr3J734iPkZE9WoWzLiTPW/S3n2iQnv  
lxZctX8Yc6YPT6a1jzPhqjVjjdM/gjN3iYfR/I0JV+6KiauTzThHD2awmmaZ  
EJ138kKNOnDmDSXyON+Z0P9E6tn9WuAsdm28WP+DCcWBkszlDeac2PPXLt3/  
yYS6Yym/jxpbCjYct165+5sJktH5dieuW3BO6NSW1P5hwkOdfUFV6y05v38T  
pTX/mKB28oUjd4Il5+TT/8pvrmBBoOrPO0f7LDl/6XZV1StZELlyoHFpixUn

wed5dRUvC7qHTpEp4VYcLnX3WxX8LGDkfJLfUGzFSVoYuF0myILMT+KQVR1W  
HO7/Au5eW8UCdsXqG1qjVpyUzM/3S1azIP3u092CaSsOj8fhB1dEWWDVm8iZ  
GrPiVAzJDZ0WZ8HTX0PnA59bcVxCW3m8JFkQlvdv2qDUirM4e1TNaA0Llvyh  
LzXCilNwYqOTpAwLTIT5o1M2WXEsVnYc+baWBVw29/p3NVtyJjicjvWs0C8  
uXbLJmdLTpaUYkOpHAtlegHHpZ5acAwudg2lyGP7dioT7moWnP7Nx3l9FVjw  
+45fjvgxc05itbK6qSILdmsm2LdXAafzYfzR+c0sUCw9lzz9jcw5Yqea90KV  
BSJ+jgqHZU05a192N1SpsaBs7ldGrgHBCRpW4wvayoKQP/eaVxkbcOQPvlE3  
12aBi2oBKU7FgFPzPdF5gy4LSjlkfB8L6XH+8vTmvTFgQcGjZpXTJzQ4bNVU  
DRtTFIRx3o0cWy3FMb2p66KIWDCRMklfe8XHGTyejP5rxgLfB0E7Zv+ONWrZ  
G3DuWrJgmSs9TS5rFXrd/WGYbo3PD1v/KezVGnTCK4M/ypYF0t6FpYFXN6An  
4cMuqg4s0FZN3nTRVAWFL1CPrdyB439se2fHHTUkcZqU/8GJBVtHqZquXFuR  
T3bOp1xXFvAcf8k3fFYX8aw1FYh2Y8FonN+P47N6qKJoXNPFnQWJ5aPHa50M  
0I9bKEbAkwX15mL3KvsNUSHxOX/EiwX+8X01d/iNkdUj1sOmfSxwogw0LyuS  
0GcH85GC/SzY9qbiXCmeH3JeTwkc98N8t765PKBgggz35W3dHcAC5Y7pW80r  
TNHAqKWrbhALbGzPeSR2maLkyG8xqw/gfLuqY2iaQkZbfuRfmAzB+51PfpFT  
ROhZgk3T4zAW/Kj6vXZ7OULRAnMjl8NZsGkL7B+XMUPraRcFT0eyoFrtnY98  
hBlqWrddy/MQ5n+9z32pMjMufGXe1fAIC1QCPYVnn5ohYY2iWiloFmhE+f3u  
6zBDNbcdCqaPsaC1hEdlscYMeZj+aGqPZYFg5BvN8JNm6G/LldFrX7E++kE3  
/VXNUMkOJ6GUeGxvv/VOrtsl2ff81Np/CvPtyX/zoDxCMz5Xd5kksOBspmlE  
RwgZscdd4mSSWNAgSNe5QjNFpoeWC74ns+D+ZEz+0mUTREnaNVaZyglRMtf3  
blT8npivrT6dxoIEpTudj48Yo4Fg6did6SyQ1Bldw7fDCGk59vH/oLLgX8pm  
72p8n3ZL71ezYLFA3+etr/93bRRPaZqVymXBTOXfft+zW5Hy8qb68TwWfn56  
KW9ESQPFFhyxpxZgf94Qm7/lqiAFNxtJ30Jcf0nXc7VjlFH7k9J3ekWYjwNp

zJAjiugoSbCE9wrOV6dzXxdzFJBcVvH4bzEL4r50TERWbUCP5TsNKq+yYNis  
aWE1dT2KpG39c6oU8y0fcPVMpwyS4cl+7FLOgiNCmhcyj65BTTEzVKVKFkyn  
0U98SjdEoZM73RersL0NIuOGshJIwvu2fFs1C9R2SJ9x3CqOGp5JjV+4yQLj  
K57P+9rEUB5zi3IGmx/Kjqv57kYEql9G2teywLTk7EWG9eKo/sqJJC6i+v1  
b2iA92Vx5Hc+X2D8Hu5v8m40wzAJJCS8/KKujgVFFLK/+2FJdPv0vvOZD1gw  
/2VreOAdKeQ9y/Hb34j5mNO0FtwmjXgDFdT1HmL7dhYpX6dlUHVP0hzPfyzg  
u3Csoe7jOrRn+6f6t80sGGA/S5UWlKncDVYpFS0s0Jpwi6sKl0flWtccTj3B  
em9Ik5RIUkCul/mlXFpZcE7+jBRjdBP6LRk6oNjOAo6jYvrWACVUktpestDB  
Aubp4lfbfiqjHwep2y48x3rbzDCHDm5BRe+n/0S8ZMEaCrIDw1Yd2e90eQKv  
WNC8Bb5uM9ZEBYaSe8Z6WGAYRoiFa+ogWHE+Tvc9C56UrzR90mSAJo/+Ap4h  
HO/RbUUrI7ch+piX4NuPeP0xB1cnUyM00iGff3KUBTG8QhJzlfh9jhL9ncdZ  
kGxm6/yxh0CGtz6qK06yYB2nvqlgEecvu+TB0ykWEEc1FK8II/we5juTP80C  
CXm5lSv+ITQQf8AxYoYFt36o/dr93gydnW6VgjkWtHmPP9ztBkjLT31QYp4F  
bqIWfHzVgN6+yrg6uoDXz/gJm/8GlGjzNeL+DxbIvk8RETYxR2p1ToYZP/H+  
2hG78HBz1K1x8+++3yxY2Pnfj+Asc0QMT0Z4/GHBlsyOqbtF5qg4T2nQ9R8L  
znB7dCcUmiNh532001awgVMnGfXunDmK5s19YLuSDT8LjjULhpijgQcv1C14  
2aB9+zIKtDBHVkeE8k352fAgOLCiQMYcVW2xEjQSZMP8pvTOWAlAaz6citNd  
xYZ1zh8ORt4BdJp1b1xjNRsueOg4H0wAN0Yw664iyoa5su3k1baA7t4P3CYr  
yYbArNUVliVmSD6qsGTNGjbkv0pdm7rVDJ3b3CspJsOGl0vfu9/cQ8iD7jDH  
I8sGbqPV/pmvyajj7qzfPzk2+Pz8vLM+lIzU/nFe/JRnQ870xhYnXjL6dVDv  
xrQijueP+OHrzbIXzFcfIKZDQZJxud7fpqg9t6r1E8q2P/U3uyEUhN0wXpd  
eK86G1aW+Bw8L2qCeJZd33VrsuFg4i2aVgeeV2sy7bu02FAUukcwMxPPnyFP  
6p7qsEGwme+7pRueJzdyqTXrsUFR6ljUhCKBSt6Q8hoM2HDe3uvSqp8ktDrz

KP89QzY8MosoNntLQjEW12NuGbPBWcu/QJpDQu+XxkYrCTZ0xM1UKFaTkM0N  
hd3XTNlwK+nZt4VSEroR5NlShNhAq6zJUKwiobVyTP0LwAaV40c8NR+QUGJ3  
1xWWBRscQ7hjgl+Q0EQav0SOFRuIf/vvGk+QkluZeVK6DRskS/QTt3ITaFNV  
7f4EezasvneogzPy+n+08+007KB8omP19KDQHNrt6BoJzZ4N9p8UoshUPPZ  
C3KhrmzoX6505b1FIHXTNxbBmxo1dqyRrSLQIw5kd/73HF+XPJ0zRon0HKZ  
XZiHBxta7kxfWc1lgufX5D5XTzb86sk8KCNtgjrXNNjt8GZDZuigmKGaCdrW  
uXDP1ocNxa/Sfnw3NkGFydqqFr5scIs3OvPOygTxkULZpv5soCt2da5yMkGR  
367wGgXi/Fh5atUGdxP09upAtG4wGzZCzW+ufSYIvKVHNELYcFlvaqLM3wSV  
SbjsUgljw2nDCnm+AyZlrI3SrBD0huFrBycEw0zQ8YRHurKRbFh8f4N29aAj  
Gt72p2jNITZ8IC0GtWNSp2UoJnaEde0SnJuheH3NIUMJQtFsGGxJbYzG563f  
WzHNE8MGi8rnbwewvWTRkX3/YtmgtGmtA8PbBH15vKhr53E2XEn64E9xM0Fx  
pJM+3fFs6Ew7zDngg0073v+t4hQb/CJnvl8DE8RQICWIJLABemrFTAxMkAlz  
V8I7iQ3P1x/p2KVigqr5F4sNUtjQ+C/v2x8ZE2QS77Zt9Vvk2BMe39xwVNEHu  
/ulenDQ29J3uyNOfltCnN1GT7HQ23Fvbv70zSKBD25+diMpkw447h40jnxMo  
QyfjokIOPr+6jilTS6C1JZNaP2IYP/PyEwalBLomY9f0ksGG5N+X4v7mE0g/  
49r0ChYb1keS62jZBGr6y/MpORfnj8ama0JnCeR0JCda6zwbuh5/rjoTT6B3  
o//xGlzA9faMdEfuKIFC9irkCl9kw3Lv9YrpgwRa7Dy9ZbSQDWPPhxu5JBxMo  
BQbrGovwekezzFI/AonVmjiwr7Chomx63eI+AhWq5g9ElrAhkmvV+nueBNK4  
sBRhe40N5NMPYHwPge6L7Pm3sYwNEo6qFim7CWSTfcdnqRyfzzjWfW4XgV4t  
SCq+rGTD3YSuq7M7CeQbeuR2+XU2xJpCDzW6EGh64IVV8g026H4xHBT3JlC8  
i3aP5y02dHPYDyIwFmihHtC/zQav9wUldhizjaaWVt3BfB09tPs0xsqV9ukj  
d9kgVG6czl3PuyVfltt4nw2qZXIfXmOM6PzXWfVskLlgqTCH7XfyBqPIBja8  
qnz90x37t/d4y3MbDhv28PzYyIX9H5tS9NvYxIbCZy9tPrsTaMXrDykvHrFB

T0BXU9WLQFm2aE35Y1yfe2sOuGN+5B4UXEt6yobEyXc5qfvxfXVlb5teBxsS  
3v6ebQ8gUMua+56ruthgBA0dz4MitjMiPfXpGRvKfhu/u/v/v4+6HH2q4QUb  
Voiei4wLxf3v0CsRVjcbjiSY9ApjvX5+0i2KeM2GLa4doeHhBErdk6Nr04Pr  
NbMyOjuCQFId083yvWzYrL/TPjKSQJfRDrcffWxoc9A1XRFFIK2aytHn79gQ  
9a7pAmDcsFkotmyQDTbj0fXKGG8/HyKQ9IENp6KbJ6/i/T3CT8/v/cgG31Vv  
bz3D5wcmmbtbQ+4T7PcP49ntsf/Z7SoPQKBuCSs5lDWD/hN/BhwcTOD/81KjF  
2P/zTpcOMT+zYW/WeWpECIFUmv+sijc/FrrKarieM3L65XlZ9jw23Vtc1gg  
zp9L/FVb59gw8I7bpc2fQDpsN33yPBv8e08VrsH5KJ8ybe69xAYuW5eR45jv  
X96K+/O5cqG1ljmahPU6vCtqrJw7F1RZ0vb7sZ4T2xsi6nhyIVj+Nlkb691j  
6H6yVyAXlGxyjcsdCVQJln5eWjwXDOViftRYEkiN/62CimQu+Dv43ikwJ1DR  
H6WybWtyYTz+RvwFMwLjzB/StpbJhdjdvBO3yFj/z4133dblwn8JK/OGTQjE  
+1EIBcrmQswVBzUd3N9Pvt3z+OiGXLAOSiBdNCbQfFejY8rGXBiMgmBNlWld  
bJl9Rd+UC7OhOjuGthFouB55XVHKBe3fMxkPDAjkeStj+NbmXLDtUGpq0ifQ  
y9Le0P9Uc+FzUti5OT0C2RVunn2hlgtPnwQn7MLYMOPhv29bc2HmPF/cdV1c  
D3F7RUT1csEiWSz3E8YXlq+x5A1yYeRP7YkdeL1E0Hc5LcNcuJb/WqILY4oX  
lJCNc+G9QqDDfmyPy5WqsYPIhTqf7P+4sT+xdv013qa5EKiYLHEX42mkSoSj  
XBaiQt7FYv8HNf6zy7DIhV8XG7dvwwG5KYq8yLfkYupZ9T4cPyda732VNjk  
wtffXxe+Y1zPuxDUZp8Llo/3tI1gvtgftqTw78qF4v07M+YRgVb3HBOS2Z0L  
Z4gfXL8w/2c6m2kqe3LhqGSh4x8g0JE67yJrL8zX0sX+HxYEmrxRrrp7Xy5I  
qL1b8RXr6XttsTpwyf6sq/PQG7TC/ZGR05gSkAvCgQcYFTYEekwZtGIE5ULB  
r4Pnzv7/94kS1TuvHMiFsroH6nvsCHQ7JnZXTWgucO8X2y+/Hd+/ES39/x3M  
hVNlSnz9GF80EPd/GZELX3bdWEGxx/3b02dyKCoXNmyM0Fd3wPOoS+WhmcM4  
f55Kn2rAmN926ce/o9gf4eAmhPPvfzclvOg=

"}],

{RGBColor[0.880722, 0.611041, 0.142051], AbsoluteThickness[1.6], Opacity[1.],  
LineBox[CompressedData["

1:eJwV1mk41N0fBnD1kEKWSilr1pAsmWzJbQlZxx6FGIEZYixjDWN+IetQZmiR  
pUQKLYREStuTh5KUMegpqVCKUuk//xfnOtfzbn0+X7Pua+znhLmGriYj4/v  
AW/8f9468/wLTYzPjC8k8t7UgpfZcN5Y/Sc610xg5p/JgmoSkh/IRl6kfzYL  
GQ0P5bpsR89bl/ds+h+ziPxASdUqd2RduV+/MngxLMZ9bx+ieqMuIsLgtdQS  
nD+d6Kux1A9zX+9bjdKXQ+Dp6q97DwYgx7t57GyBOG5NVZ+mMwJxplm0Wjh4  
Be4uTcPJZezHnbhm7QGp1UHSOrt8OpAK4XlR0yi6LC61snI4JBpkfPbxDTrK  
4+Td31OX+S0whjv0urRAAasu9l4k/RcBdVO9c4LBihA6+OmGnX0U9D4PLbnh  
oQSBjgMG5ouiYXI6/cAhc2UUDy6evByNBz/DGk+k1LFxp3thsKLYuB5KT0n  
g18NkqQbDkOImfD31ZsymVbDIj1GDsskFrSb6VfK76vjZedtCRtKHAoP6xmF  
07VQ09w1KxaXgBlT7gklyiYojJyz1vmWgEpu+u9+R204vRR64U1NxFDJ5HBJ  
gQ5CimRqrJwOY2T2Dit2qS4iVzgetWg5jDGnYnPXJF1Yx8rH3FZMwuSCZYVA  
sB48uoKyGj4k4avnWvfHYT10TISd97NNxlztJH+zx2borur4PVORDD7/4qAQ  
c318fVbpp6ieghXtk+pPbbgPLn9D9/9FKxe0/nyYu4WPPShuNI9TIF0WHFW  
Gr8BlPYUGVFEgVCWt/psNG2A++/OHVV0YWBDzNqSIUGGEDP02sUNZ0CrZ9Lp  
86AhGkW63bLyGNiSXFxfet8I4olbFkYeMmD8/NDeeFNjTDedSCsaY8BM22qF  
+1VjaAqHrQrgS4Xt8Gsk4BkTsGcmbzttToWPmZXBlobptFY5a5jlpWJTukaJ  
7qwpks/W7xGtTMXiHnGB79HbMLBVtUegNRU1ftzehGgzqC9MLM4aS0VK5R0j  
s+9m4IqUIKr+TIXGnDuZYQxUyFzVXYLCxMI2k+tWLCCK4upPF7SZGKfUBqvO  
AwoblzklgonetPVyS43Nca9AdrCazMT5bsEjj5rN0STxL0c7jAmyX5+ra7MF  
9sv3mdDPMWGcarNE/6cFdFjGvS2XmVCubGmWNLLEgoCULPMmEz8/lyoMNFmC



5KOhV/eUibcSq/pafliiiyaqLv2KiW5SevopQyuIqY+9XjfORPnh0En/Jits  
eyzZ9GaeieyykTLzH1YgX2l8ffUfAvS7bh5KhtsRoPK+U0WEgP1y49Z317dD  
6pTC/Lw0gS26l8IezG1HTlfp7n1KBBQ8FJQuGFjDtzf0ZIIGgW+nImSGXreG  
hpdvVjsBgVe34kyd56zxQO+B9ZQpgQdvP03rGNhgF1eF8cKSwOmNT72+NdrG  
uf+G21wnAhlka+H+WRus/Dtru+BGICKque36FluEvmzYP7KTgHXrGZWERltU  
jd+Y/rKXgM7lioHds7b4+/SihUoQgXX8adnbtuzApVohXcVgAlP2ITOLGnfA  
nVqyL4VG4GXYcOWb7ztQJUWRHIsi0HnM1ecuyQ7R2t6UdbEEigYNOzla7NA3  
N+7/5zCB1L81UcHf7SC8fHxVbQqBECX5DQ4ke9AyZxkkJgFPm4JBrWh7VDbZ  
SRYeIWBOFcgTa7CHXV4xqTudwMa8WIsV3+xx15VQGz1KYPXVj9979R1Q0aCm  
2ptFYGL+yW72NQeMuhbq2+cR6JPbLh77zQEC/kal/SwCbRZNd7z1HaGdqDnu  
UUCgKkgzxiTKEXqJpaWsYwQKMks0ZK85Il+j1K3jOIHEWolXCz00eNikPfSs  
kEBQL5E/stkJX+ZLVHvYBMizc1a3I53wy2ibTC2HgMk66o+Kq0543uZbGVnE  
q8do9PSOKSe8M+35IllMwKEmZXxKwxkZhW/TKnh+Fpk1UhjkjKg94stkTxDw  
28p+YVLuDKmcDmkmz+/5yx6/5jrDPWQfpZ/npnceb++IkNEbWhW/5iSB33a7  
RtgaZCix4meseTav2zN00JYM1c4E70Ce01YGvdgaREbLvINRJM//xID7xAgy  
JD4ay9N4Fh0KfzxaRsY5scxcf55dQe9qaCfjn+oGPjOe2WcTHmRwyWBot0+K  
8Ty4lNG56xcZsdjVT3p5+1EITbu1aa0Lfo5Irs/ged+TrNZFBi7427zKTofn  
Klj+U5+7C3Zuf3jtEe+8n4vZ185HuOBpgOtDH571Fk7Wx7NcIjvdPcXl1YtO  
KbvoWOUc30zZHA+eW+5VVil0uSDnR+7vDI59FzQunp354ILTdi0cJZ7TZxpP  
Fau4Yu/K6Ov3ef3p8motCrF0BWFw5IMQz+KtHcfN9rriSdDoSSteP4ulruyx  
U66A/nDDKV7/L0iOJuquckPGVH7P+1wCk3HvY/n13MBH95V4n0Ng86tPUc+d  
3eBa5yM4nE2gtXlu5HCWGxyshH80ZxL4z2C578PF7pAdzpVSTCMw7W1ouveL  
O/IPBiq/TyCg32ZqpC/mASORTdKZ8QTiFC1JgloeUMu26NwQR2DxR0etSwc8

4FvZ00ZNI7AyMUD257AHL4c9hXLDeflQkvuH1e2J/W4HVXz2Eagp/6rf/dET  
FuWd090UXv3Pe4YIL/PCI/fm7ua89ytcLzd4xNILAvp6JHk/AiMdtU3xTV64  
eu1jSlcXgcyx7sh95TsRotjOqrXj5clGsQkDug9m33JUM7V59+VGXv8rWT8Y  
eRXLa80xMTHhvPStQAAajVPZKglMzJv3Tso0B0HLS4asvlyJzDVDRypuBCNU  
1an7ACsVpJnmDFrNIUzqRCvek0lFoMjRiQ5NGnouOdtGXGUg/NWPcZp6JKKO  
J8dPWTIQ9kxFxEogGsnaH186v0pBYs/WsebndLzR7G3+lpiChxkcdv+TWHAr  
xVW7JVMgtL8uRPJCPN7XXOysDktGFr+w9K/qRDR6a7bdq0rCunPkZKI0CTfE  
dSecJg7DqUGdv8g4BY+nDyx6sfUw6ua69DsMGSgbqAtWPPkIzK7umF8qqXC+  
5LzoFjcBAoyvqsvUmCi09S27sjEBggbcLw/wcpmiaiKhwowHMznVcUD0CNpZ  
+XpXxuNw5ry0p6xoGqYj8h6QtseBRFlji/idBvUr/wWT6mPhKse3f+27dDyj  
3F4Tsz4WYi2iD4+9yUDRI3IPMmNgPZ5gKv/4KAw5Mg0JfDGQnRWSS3qciRqL  
xtimQ3QkCOQNbOrKguDNWbX1b6Lhdp52froxG18KNUL/BETj0Qb66yMNORCR  
zlp250ahbeuA1saKXCze0b7sCiUKBq66HsrZeRjrWnx083Mkqio8vsVYsUB5  
WcEtD49ExHtzm6AWFsKXburX/hvBW8eMvM04H03x/TNy6RF4w6G0llzOx0RD  
8ca6tRFIKlxBqVItgME1Jb0X9TR8SP2Xc/JcAWLuZch2m90Q33zZc43MMbA7  
ZX6VDoVj2Uj1o8RTx0B175Q6QQuHVbrMpqx1x3F6/5VcaeFwtMa0rVVkHQfT  
iK6WvCsM/DtpN8rFChEcTK/oKzyEowY3dzVphZBUffFU9zoUvZr1C76/CqEe  
9slGmhSKj3dl//sZx4aKi1ChVVIIzKtblOWm2ZivZA/WP6ei6YzgRa2vbKzZ  
6HbnSR8Vomz3zabf2CipHJ79+oQKOeak+e4fbFBX7zDf0kXF/G5F/xN8HKiu  
S6XcukXFFfHM4tUSHFQmXu0ZraZCOdZbVEyPg5Td3XJ7Eqk4eaiyUE6fg/SG  
Q7TMOcpWBM7IbNrCwWH609EGOhV8rjmajsYcvN1jqifMo4Kr2WGbzCGBYUn9  
6xbe/5g9vIEp6MaBwPSEwwZnKpb3Rwut8eCgLSVgh5cDFUTX7XxVLw4ufDFg  
pe2glqJ5d+n2Xbz1Wc9+j1lS4XSMdZMZwMEfe3GXKkMq7h7lWh0L5GB9V8GZ

ARIVW1M0usr3c1DmpG8ovJkKjdD0lx1UDk43NtiEaVFRFiBBeRLKwVK7tLYy  
DSqkfPw+jIRxcNnEK7lPjQoWuSZ8msZB3qhCpqAKFYI2P+b+RnJQUjj4yliR  
iv8BiRm4Kg==  
"}],  
{RGBColor[0.560181, 0.691569, 0.194885], AbsoluteThickness[1.6], Opacity[1.],  
LineBox[CompressedData["  
1:eJwVzHk81IkDxvFJLEIEB5UjR5MjlBy5n2Gi/dUgV1EoQhFmCOXKkfuams8m  
yyJy7bSlS0Zo5Y4iirRESqnNEULaav3+eF7P6/3PR949wNaTj0QiRa3s/280  
N/CZIUyyJc0uSAQZmpmOZI5XfQoZNh0riAj1DNuOi+0yQddCjk1b+eJ6wox2  
o/utvn1ayHfTLy2GTJdkUyzOtlEjQtbhY2Ks+JE2GtKdeONX2euxak9Yitgl  
GxTyRCvX+kiAeT2qJUTKfK0XeJqDUpuR9Ouf6Z2yDli7LGp8LkQGZZvWKNC4  
zpB2PkX6myaHtMAy/ZlvxyA5PPS6iL0dtDY+ElfXBSrGWqWCPgoIePRy2+Lv  
bqB9H1J7LkVG2F0F5VR+dzj+mZiexL8TlNCD5dZJ7nBz0Zo2nNmJy6e0/EOF  
PMCoT7xV3KaCdr9Vvad+eCA7UkufHqKOH6Mm9sVNnihQH/5N0V0DBmoqyhFU  
vVA2nPhvP00T3dtrymKzvDBUMDVSwN4NhpmPYLyzN6Z+mJcl+GjvhvZt/dmb7  
acw6brEfGdFCnkcLZ7/sGSxen+LnOeyF7ZFXdk8YZ0Byy/U6S9FGaekEN1/C  
BxIPplT6pHRhJuGQM2vki82SzS+vZegir01TTzDOF9sCclMT+PVAM3ex823z  
hZlCdVJ/Rg/MdvtPDgfpQvdibIVRmz6Ul5fqJCl+MBjwPxlmblCyLWt0CoX7  
wVSTKmF/2wD5Wrqilbf9cGBkKkiw0BDaqjqKSvL+cDal6vmHG00F/RxFdMof  
GomqBXsWjHEu8VRbrkIA+LrXC3wJNoGak/j0rEMAUk7DveHBpjjp2Mq3jxeA  
HyaG96i1gHqPtHWqPh0T7td9yMtAUVYvLdOajt4EeVkhAwqao3c0ynrSuf5E  
ML6TR0HV99bC6Qw6bFyf2dryzNCX+6/Rg2E6DGltf9H+aoYGqcb78TN0KJXV  
8jbpM2PO4TNzjo+Br5NF2wdrzLE1PbKrh8xAcaTflFsNFSnt5W4jPgZM5/+S  
4nfpAi0Vdd0+7xh49dcFY+tFCxAlCeIv5hlof/tpZreeJV6y7Z6Lrw7E77v6

jsxXW+Ltrbarn2UDYVFXuCO8+gAWIkqCM+wDcfnvFY1Jd/+Hod49diE1gTDc  
6rtUctsKyRtHB674BKF5LHjm12krNNzLDzx2LgiHuNET06rWuH2wKEsgKgiu  
RjkdIutUWI5YKjOCgLlxomhMwds8NeugBP91UE49TS1bpXeYTTx9+q++xmE  
PzaNRezZaAd6ttsDudRz0C3I+M584gihp5XZH5nBSLif2f9KxhX2RRVnD4aE  
4uNHa6G3Ah6Y5+XXRAVewDKld0qa54U0uXJuP8KRikUX3Lfb2UsVsyQSiR0  
5nhJDK4/qKEPzVV/RMFTJPljoxoDS6qHK47ZR4P+ammCoRIEZ4Pslzt1YxDw  
flcIVSAY8oL5VZOrYxHRbTTOGwgB6XrpiFhHLDqSODn9T8/Dff3C4GRuHIS9  
b5zd9EcY+rfeadY9egmp/Gu3fauMQM+1Wj5CPh5bS20uXiqKaknGmfG4mF1  
V4X/skE0Ht4ypAuxE3BjsUu7cV8Mde1KxvkPJSkl60notx2xeCRRh6gviRCI  
mSWv2RmHcFa/3YOKJajqrb15WvESOn37qk/bJyPuYixtUDQe3Taph9tmklFY  
vs1RRjQBvpHhxodyUqDjvoER+O+KnUJ/ktVTYStL8t7yLhFXSeRH3PpUiNWK  
dhBvklC6kRPd5JgGi4lwY7meZOh8rjcyHUuDzIKwbFRPCiy8stj7g9MRLpA5  
qNGVCgtq3iHy6gzYITPKZ6rTkPZM8OmruAx0Koe8jr+bjuLHz26piGSiwWhQ  
fVdJBsyt5x0ScqEnu0eB6W0THCt7OacfmaiosRhPpTKhIMKI/+eCROB7ymW  
XrVMTHi/4004z4TINI MbEwMwtCYVaJN3mHjD8R0ruMlClkXJ2+4TE1HZEu4V  
ZDbkeKc7POVZ+BD7ijNXyoZylRknz4kFFu+mo6Q0AVf39H19aSysGa3sjMgn  
kNWyQXhVEwwURGmN1K1ZmF1nff7NAgt1oQ1bFJhZ4KobbiSvdPmPMu4Xi2Uj  
lnAV1jjKRnKM3TtuQjZoedM3WuPZ6FWr+uHyLRsbv6XIB99k458Wmcdfl+Qg  
Zq+MY90IG5TKWiXZmRw0uz1+Ob6GQE2h4DX12Rw01C9+KBQmsDvHfq/xfA6y  
Wj+PO60lIBs3RTm+lAPNzuNXH4sQWD6u4PYbiYN2WBjeESNwa31K7mZxDo4W  
KPRFbiKgdN5JVEyLg32V9TV88gTy/MuyZbU5qJat8qxdsYTnnLSGLgdU5Zs/  
GQoESLbpajQDDiaa3i2PKhIYVms8kGrGQceAo2gDmUDOiHKcoB0H8ftj3H07  
CKzrDxaWdOBgQ0Cripo6gUtdD1nkIxzM0WuzX684kHe8aP8xDnZ279Wx0iRg

RTDr4zw40Ay/wiZrEWhJHqYSnhzQHUTCh1ZsFK3aVezNwceAOzbsvQRU/Zpf

NvpysERubvquTeCKh7j7Uz8OKFc1T97WISDl7PphNGClpzj6z2ldAkwbLn2G

wYFM1oCHrB4BQculxZ9BHHi9l+zoW/F/QfKV7Q==

"]]]},

AspectRatio->0.6180339887498948,

Axes->{True, True},

AxesLabel->{None, None},

AxesOrigin->{0, 0},

DisplayFunction->Identity,

Frame->{{False, False}, {False, False}},

FrameLabel->{{None, None}, {None, None}},

FrameTicks->{{Automatic, Automatic}, {Automatic, Automatic}},

GridLines->{None, None},

GridLinesStyle->Directive[GrayLevel[0.5, 0.4]],

Method->{},

PlotRange->{{0, 1650.0432}, {0, 1303.680298}},

PlotRangeClipping->True,

PlotRangePadding->{{Scaled[0.02], Scaled[0.02]}, {Scaled[0.02], Scaled[0.05]}},

Ticks->{Automatic, Automatic]} \) \!\(\\*

GraphicsBox[{{},

{RGBColor[0.368417, 0.506779, 0.709798], PointSize[0.6], AbsoluteThickness[1.6],  
EdgeForm[{GrayLevel[0], Opacity[0.3]}]},

```
{RGBColor[0.368417, 0.506779, 0.709798], PointSize[0.6], AbsoluteThickness[1.6],  
EdgeForm[{{GrayLevel[0], Opacity[0.3]}], PointBox[NCache[{Scaled[{Rational[1, 2],  
Rational[1, 2]}], {Scaled[{0.5, 0.5}]}]}]}],
```

AspectRatio->Full,

BaselinePosition->(Scaled[0.1] -> Baseline),

ImagePadding->Automatic,

ImageSize->{10, 10},

PlotRangePadding->None)\)      blood

\!\(\\*

GraphicsBox[{{},

```
{RGBColor[0.880722, 0.611041, 0.142051], PointSize[0.6], AbsoluteThickness[1.6],  
EdgeForm[{{GrayLevel[0], Opacity[0.3]}],
```

```
{RGBColor[0.880722, 0.611041, 0.142051], PointSize[0.6], AbsoluteThickness[1.6],  
EdgeForm[{{GrayLevel[0], Opacity[0.3]}], PointBox[NCache[{Scaled[{Rational[1, 2],  
Rational[1, 2]}], {Scaled[{0.5, 0.5}]}]}]}],
```

AspectRatio->Full,

BaselinePosition->(Scaled[0.1] -> Baseline),

ImagePadding->Automatic,

ImageSize->{10, 10},

PlotRangePadding->None)\)      liver

\!\(\\*

GraphicsBox[{{},

```
{RGBColor[0.560181, 0.691569, 0.194885], PointSize[0.6], AbsoluteThickness[1.6],  
EdgeForm[{{GrayLevel[0], Opacity[0.3]}],
```

```
{RGBColor[0.560181, 0.691569, 0.194885], PointSize[0.6], AbsoluteThickness[1.6],  
EdgeForm[{{GrayLevel[0], Opacity[0.3]}], PointBox[NCache[{Scaled[{Rational[1, 2],  
Rational[1, 2]}], {Scaled[{0.5, 0.5}]}]}]}],
```

```
AspectRatio->Full,  
BaselinePosition->(Scaled[0.1] -> Baseline),  
ImagePadding->Automatic,  
ImageSize->{10, 10},  
PlotRangePadding->None]\)      gi
```

```
(*-----  
-----  
-----next mouse*)
```

```
vn=readTac["C:\\Users\\exx\\Downloads\\TbD120M3, Liver 2.887125, GI  
0.62875, ID 3811.csv"];
```

```
Lv=2.887125;
```

```
Gv=0.62875;
```

```
id=3811;
```

```
vn[[1]][[1]]
```

```
{{10,161.07},{30,362.647},{50,124.767},{70,69.0519},{90,49.0439},{110,37.7673},{  
130,32.2609},{150,29.1763},{170,28.3615},{190,24.721},{210,24.4771},{230,25.49  
4},{250,23.9667},{270,22.5239},{290,24.6465},{330,24.7203},{390,25.8241},{450,2  
4.9799},{510,25.5785},{570,26.1372},{750,23.2935},{1050,25.5588},{1350,25.7555  
},{1650.04,24.2058}}
```

```
model= mouseModel[Lv,Gv,id,28]
```

```
ParametricFunction[\\(\\"*
```

GraphicsBox[RasterBox[{{179, 179, 179, 179, 179, 179, 179, 179, 179, 179, 179, 179, 179}, {179, 180, 180, 180, 179, 179, 179, 179, 179, 179, 179, 179, 179}, {179, 179, 180, 179, 179, 248, 248, 178, 179, 179, 179, 179}, {179, 179, 180, 179, 179, 253, 248, 179, 179, 179, 179, 179}, {179, 179, 179, 179, 179, 248, 248, 179, 179, 179, 179, 179}, {179, 179, 248, 248, 248, 248, 248, 248, 248, 248, 179, 179}, {179, 179, 248, 248, 248, 248, 248, 248, 179, 179}, {179, 179, 179, 179, 179, 248, 248, 179, 179, 179, 179, 179}, {179, 180, 179, 179, 179, 252, 248, 179, 178, 179, 180, 179}, {179, 180, 180, 179, 179, 248, 248, 179, 180, 180, 180, 179}, {179, 179, 179, 179, 179, 179, 179, 179, 179, 179, 179, 179}, {179, 179, 179, 179, 179, 179, 179, 179, 179, 179, 179, 179}, {{0, 0}, {12, 12}}, {0, 255},

ColorFunction->GrayLevel],

BaselinePosition->Bottom,

ImageSize->{12, 12},

PlotRange->{{0, 12}, {0, 12}}] \) \!\(\(\*

GraphicsBox[{{}, {}],

{GrayLevel[0.55], AbsoluteThickness[1.5], Opacity[1.],  
LineBox[{{9.09090909090909\*^-8, 9.090909090884856\*^-8},  
{0.0874367476365131, 0.08197166587636243}, {0.18222810297558026`,  
0.1358255024317191}, {0.27073779576926765`, 0.13315455086535802`},  
{0.3575112797365835, 0.08143316377978886}, {0.4516394623155443, -  
0.007347854733426912}, {0.5394859823491253, -0.08816932746972758},  
{0.6346872009943513, -0.13787329990112937`}, {0.7281522108132057, -  
0.12816574147938434`}, {0.8153355580866803, -0.07001063326902106},  
{0.9098736039718, 0.02121659675083076}, {0.9999999090909091,  
0.10024804094746914`}}]],

{GrayLevel[0.55], AbsoluteThickness[1.5], Opacity[1.],  
LineBox[{{9.09090909090909\*^-8, 9.090909090880112\*^-8},  
{0.0874367476365131, 0.08090369567458766}, {0.18222810297558026`,  
0.12746559200130417`}, {0.27073779576926765`, 0.1116266937044405},  
{0.3575112797365835, 0.046963725126600256`}, {0.4516394623155443, -  
0.04509050859182233}, {0.5394859823491253, -0.11115559892361665`},  
{0.6346872009943513, -0.12642564594664163`}, {0.7281522108132057, -  
0.07740196037964171}, {0.8153355580866803, 0.004179083230780074},  
{0.9098736039718, 0.08937493944143977}, {0.9999999090909091,  
0.12834702174618903`}}]],

{GrayLevel[0.55], AbsoluteThickness[1.5], Opacity[1.],  
LineBox[{{9.09090909090909\*^-8, 9.090909090875369\*^-8},



```
{0.0874367476365131, 0.07984396759533968}, {0.18222810297558026`,  
0.11939549826670079`}, {0.27073779576926765`, 0.09184904274707059},  
{0.3575112797365835, 0.017913117173780694`}, {0.4516394623155443, -  
0.07109962300031061}, {0.5394859823491253, -0.11717052830989395`},  
{0.6346872009943513, -0.09879571259704382}, {0.7281522108132057, -  
0.022693471356141894`}, {0.8153355580866803, 0.06128703302641453},  
{0.9098736039718, 0.11605625481609519`}, {0.9999999090909091,  
0.10415981267620744`}}},
```

```
{GrayLevel[0.55], AbsoluteThickness[1.5], Opacity[1.],  
LineBox[{{9.09090909090909*^-8, 9.090909090870287*^-8},  
{0.0874367476365131, 0.07879243663407876}, {0.18222810297558026`,  
0.1116081822210312}, {0.27073779576926765`, 0.07372482040530459},  
{0.3575112797365835, -0.006267252216927747}, {0.4516394623155443, -  
0.08743897872291118}, {0.5394859823491253, -0.11109134853087661`},  
{0.6346872009943513, -0.06371549528296311}, {0.7281522108132057,  
0.02544576624054603}, {0.8153355580866803, 0.09464282937855747},  
{0.9098736039718, 0.10731931496853601`}, {0.9999999090909091,  
0.0516787429232188}}}],
```

```
{GrayLevel[0.55], AbsoluteThickness[1.5], Opacity[1.],  
LineBox[{{9.09090909090909*^-8, 9.090909090865543*^-8},  
{0.0874367476365131, 0.07774905743802465}, {0.18222810297558026`,  
0.10409673959866513`}, {0.27073779576926765`, 0.05716133039337165},  
{0.3575112797365835, -0.026084496726167965`}, {0.4516394623155443, -  
0.09591154799603378}, {0.5394859823491253, -0.09685594593277226},  
{0.6346872009943513, -0.02730376120671303}, {0.7281522108132057,  
0.061646715198529656`}, {0.8153355580866803, 0.1046634148537508},  
{0.9098736039718, 0.07509702498429204}, {0.9999999090909091, -  
0.006536873471333553}}}],
```

```
{GrayLevel[0.55], AbsoluteThickness[1.5], Opacity[1.],  
LineBox[{{9.09090909090909*^-8, 9.0909090908608*^-8},  
{0.0874367476365131, 0.07671378556951527}, {0.18222810297558026`,  
0.09685439581479163}, {0.27073779576926765`, 0.042069810325321415`},  
{0.3575112797365835, -0.042006785469922474`}, {0.4516394623155443, -  
0.09808544986431629}, {0.5394859823491253, -0.07760167026270944},  
{0.6346872009943513, 0.0063643674428021085`}, {0.7281522108132057,  
0.08405712128907425}, {0.8153355580866803, 0.09555213349985489},  
{0.9098736039718, 0.03202960165577907}, {0.9999999090909091, -  
0.054402034659985464`}}}],
```

AspectRatio->1,

Axes->{False, False},

AxesLabel->{None, None},  
AxesOrigin->{0, 0},  
Background->GrayLevel[0.93],  
BaseStyle->{FontFamily -> "Arial"},  
DisplayFunction->Identity,  
Frame->{{True, True}, {True, True}},  
FrameLabel->{{None, None}, {None, None}},  
FrameStyle->Directive[Thickness[Tiny], GrayLevel[0.7]],  
FrameTicks->{{None, None}, {None, None}},  
GridLines->{None, None},  
GridLinesStyle->Directive[GrayLevel[0.5, 0.4]],  
ImageSize->{Automatic, 28.4375},  
LabelStyle->{FontFamily -> "Arial"},  
Method->{"ScalingFunctions" -> None},  
PlotRange->{All, All},  
PlotRangeClipping->True,  
PlotRangePadding->{Automatic, Automatic},  
Ticks->{Automatic, Automatic}] \) Expression: {Bl,Li,G}  
Parameters: {k1,k2,k3,k4,k5,k6}

]

```

Manipulate[Show[ListPlot[vn[[1]],PlotRange->Full,PlotLegends-
>{"blood","liver","gi"}],Plot[Through[model[k1,k2,k3,k4,k5,k6][t]],{t,0,1500},PlotRa
nge->Full,PlotLegends-
>{"Blood","Liver","Gi"}]],{k1,0.001`0.2`},{k2,0.0001`0.1`},{k3,1.`*^-
6,0.01`},{k4,0.001`0.2`},{k5,0.0001`0.01`},{k6,0.0001,0.01}]

```

```

Manipulate[Show[ListPlot[vn[[1]], PlotRange -> Full,

PlotLegends -> {"blood", "liver", "gi"}],

Plot[Through[model[k1, k2, k3, k4, k5][t]], {t, 0, 1500},

PlotRange -> Full, PlotLegends -> {"Blood", "Liver", "Gi"}]],

{{k1, 0.012799999999999999}, 0.001, 0.2}, {k2, 0.0001, 0.1},

{k3, 0.0009400000000000001}, 1.*^-6, 0.01}, {{k4, 0.003}, 0.001, 0.2},

{k5, 0.01, 0.03}]

```

ParametricNDSolveValue::fpct: Too many parameters in {k1,k2,k3,k4,k5,k6} to be filled from {0.008,0.0001,0.00094,0.003,0.01}. >>

ParametricNDSolveValue::fpct: Too many parameters in {k1,k2,k3,k4,k5,k6} to be filled from {0.008[0.0306429],0.0001[0.0306429],0.00094[0.0306429],0.003[0.0306429],0.01[0.0306429]}. >>

ParametricNDSolveValue::fpct: Too many parameters in {k1,k2,k3,k4,k5,k6} to be filled from {0.008,0.0001,0.00094,0.003,0.01}. >>

General::stop: Further output of ParametricNDSolveValue::fpct will be suppressed during this calculation. >>

ParametricNDSolveValue::fpct: Too many parameters in {k1,k2,k3,k4,k5,k6} to be filled from {0.008,0.0001,0.00094,0.003,0.01}. >>

ParametricNDSolveValue::fpct: Too many parameters in {k1,k2,k3,k4,k5,k6} to be filled from {0.008[0.0306429],0.0001[0.0306429],0.00094[0.0306429],0.003[0.0306429],0.01[0.0306429]}. >>

ParametricNDSolveValue::fpct: Too many parameters in {k1,k2,k3,k4,k5,k6} to be filled from {0.008,0.0001,0.00094,0.003,0.01}. >>

General::stop: Further output of ParametricNDSolveValue::fpct will be suppressed during this calculation. >>

Part::partd: Part specification vn[[1]] is longer than depth of object. >>

ListPlot::lpn: vn[[1]] is not a list of numbers or pairs of numbers. >>

ListPlot::lpn: vn[[1]] is not a list of numbers or pairs of numbers. >>

ListPlot::lpn: vn[[1]] is not a list of numbers or pairs of numbers. >>

General::stop: Further output of ListPlot::lpn will be suppressed during this calculation. >>

Show::gcomb: Could not combine the graphics objects in  
Show[ListPlot[vn[[1]],PlotRange->Full,PlotLegends->{blood,liver,gi}],\!\(\\*

GraphicsBox[{},

AspectRatio->0.6180339887498948,

Axes->{True, True},

AxesLabel->{None, None},

AxesOrigin->{0, 0},

DisplayFunction->Identity,

Frame->{{False, False}, {False, False}},

FrameLabel->{{None, None}, {None, None}},

FrameTicks->{{Automatic, Automatic}, {Automatic, Automatic}},

GridLines->{None, None},

GridLinesStyle->Directive[GrayLevel[0.5, 0.4]],

Method->{"DefaultBoundaryStyle" -> Automatic, "ScalingFunctions" -> None},

PlotRange->{{0, 1500}, {0., 0.}},

PlotRangeClipping->True,

PlotRangePadding->{{Scaled[0.02], Scaled[0.02]}, {Scaled[0.05], Scaled[0.05]}}},

Ticks->{Automatic, Automatic}\}. >>

ParametricNDSolveValue::fpct: Too many parameters in {k1,k2,k3,k4,k5,k6} to be filled from {0.008,0.0001,0.00094,0.003,0.01}. >>

ParametricNDSolveValue::fpct: Too many parameters in {k1,k2,k3,k4,k5,k6} to be filled from {0.008[0.0306429],0.0001[0.0306429],0.00094[0.0306429],0.003[0.0306429],0.01[0.0306429]}. >>

ParametricNDSolveValue::fpct: Too many parameters in {k1,k2,k3,k4,k5,k6} to be filled from {0.008,0.0001,0.00094,0.003,0.01}. >>

General::stop: Further output of ParametricNDSolveValue::fpct will be suppressed during this calculation. >>

ParametricNDSolveValue::fpct: Too many parameters in {k1,k2,k3,k4,k5,k6} to be filled from {0.008,0.0001,0.00094,0.003,0.01}. >>

ParametricNDSolveValue::fpct: Too many parameters in {k1,k2,k3,k4,k5,k6} to be filled from {0.008[0.0306429],0.0001[0.0306429],0.00094[0.0306429],0.003[0.0306429],0.01[0.0306429]}. >>

ParametricNDSolveValue::fpct: Too many parameters in {k1,k2,k3,k4,k5,k6} to be filled from {0.008,0.0001,0.00094,0.003,0.01}. >>

General::stop: Further output of ParametricNDSolveValue::fpct will be suppressed during this calculation. >>

ParametricNDSolveValue::fpct: Too many parameters in {k1,k2,k3,k4,k5,k6} to be filled from {0.008,0.0001,0.00094,0.003,0.01}. >>

ParametricNDSolveValue::fpct: Too many parameters in {k1,k2,k3,k4,k5,k6} to be filled from {0.008[0.0306429],0.0001[0.0306429],0.00094[0.0306429],0.003[0.0306429],0.01[0.0306429]}. >>

ParametricNDSolveValue::fpct: Too many parameters in {k1,k2,k3,k4,k5,k6} to be filled from {0.008,0.0001,0.00094,0.003,0.01}. >>

General::stop: Further output of ParametricNDSolveValue::fpct will be suppressed during this calculation. >>

ParametricNDSolveValue::fpct: Too many parameters in {k1,k2,k3,k4,k5,k6} to be filled from {0.0128,0.0001,0.00094,0.003,0.01}. >>

ParametricNDSolveValue::fpct: Too many parameters in {k1,k2,k3,k4,k5,k6} to be filled from  
{0.0128[0.0306429],0.0001[0.0306429],0.00094[0.0306429],0.003[0.0306429],0.01[0.0306429]}. >>

ParametricNDSolveValue::fpct: Too many parameters in {k1,k2,k3,k4,k5,k6} to be filled from {0.0128,0.0001,0.00094,0.003,0.01}. >>

General::stop: Further output of ParametricNDSolveValue::fpct will be suppressed during this calculation. >>

ParametricNDSolveValue::fpct: Too many parameters in {k1,k2,k3,k4,k5,k6} to be filled from {0.0128,0.0001,0.00094,0.003,0.01}. >>

ParametricNDSolveValue::fpct: Too many parameters in {k1,k2,k3,k4,k5,k6} to be filled from  
{0.0128[0.0306429],0.0001[0.0306429],0.00094[0.0306429],0.003[0.0306429],0.01[0.0306429]}. >>

ParametricNDSolveValue::fpct: Too many parameters in {k1,k2,k3,k4,k5,k6} to be filled from {0.0128,0.0001,0.00094,0.003,0.01}. >>

General::stop: Further output of ParametricNDSolveValue::fpct will be suppressed during this calculation. >>

ParametricNDSolveValue::fpct: Too many parameters in {k1,k2,k3,k4,k5,k6} to be filled from {0.0128,0.0001,0.00094,0.003,0.01}. >>

ParametricNDSolveValue::fpct: Too many parameters in {k1,k2,k3,k4,k5,k6} to be filled from  
{0.0128[0.0306429],0.0001[0.0306429],0.00094[0.0306429],0.003[0.0306429],0.01[0.0306429]}. >>

ParametricNDSolveValue::fpct: Too many parameters in {k1,k2,k3,k4,k5,k6} to be filled from {0.0128,0.0001,0.00094,0.003,0.01}. >>

General::stop: Further output of ParametricNDSolveValue::fpct will be suppressed during this calculation. >>

ParametricNDSolveValue::fpct: Too many parameters in {k1,k2,k3,k4,k5,k6} to be filled from {0.0128,0.0001,0.00094,0.003,0.01}. >>

ParametricNDSolveValue::fpct: Too many parameters in {k1,k2,k3,k4,k5,k6} to be filled from {0.0128[0.0306429],0.0001[0.0306429],0.00094[0.0306429],0.003[0.0306429],0.01[0.0306429]}. >>

ParametricNDSolveValue::fpct: Too many parameters in {k1,k2,k3,k4,k5,k6} to be filled from {0.0128,0.0001,0.00094,0.003,0.01}. >>

General::stop: Further output of ParametricNDSolveValue::fpct will be suppressed during this calculation. >>

```
Clear[newmodel]
```

```
newmodel[k1_,k2_,k3_,k4_,k5_,k6_][i_,t_]:=Through[model[k1,k2,k3,k4,k5,k6][t],List][[i]]/;And@@NumericQ/@{k1,k2,k3,k4,k5,k6,i,t};
```

```
fit2=NonlinearModelFit[vn[[2]],{newmodel[k1,k2,k3,k4,k5,k6][i,t],{k1>=0},{k2>0},{k3>=0},{k4>=0},{k5>=0},{k6>=0}},{{k1,0.008`},{k2,0.0001`},{k3,0.0014`},{k4,0.001`},{k5,0.0001`},{k6,0.0001`}},{i,t}]
```

NonlinearModelFit::eit: The algorithm does not converge to the tolerance of  $4.806217383937354 \times 10^{-6}$  in 500 iterations. The best estimated solution, with feasibility residual, KKT residual, or complementary residual of  $\{2.09708 \times 10^{-13}, 0.0000832214, 5.03087 \times 10^{-14}\}$ , is returned. >>

```
FittedModel[newmodel[0.0495878,5.86338*10^-13,<<22>>,<<22>>,0.079602,5.86338*10^-13][i,t]]
```

```
{fit2["AdjustedRSquared"],fit2["AIC"]}
```

FittedModel::constr: The property values {AIC} assume an unconstrained model. The results for these properties may not be valid, particularly if the fitted parameters are near a constraint boundary. >>

```
{0.958671,866.643}
```

```
fit2["ParameterTable"]
```

FittedModel::constr: The property values {ParameterTable} assume an unconstrained model. The results for these properties may not be valid, particularly if the fitted parameters are near a constraint boundary. >>

| Estimate | Standard Error | t-Statistic | P-Value |
|----------|----------------|-------------|---------|
|----------|----------------|-------------|---------|

|    |                |              |               |                |  |
|----|----------------|--------------|---------------|----------------|--|
| k1 | 0.0495878      | 0.00911794   | 5.43848       | 8.41841*10^-7  |  |
| k2 | 5.86338*10^-13 | 0.000336767  | 1.74108*10^-9 | 1              |  |
| k3 | 0.000733923    | 0.0000990134 | 7.41236       | 2.98029*10^-10 |  |
| k4 | 0.00060989     | 0.000883675  | 0.690174      | 0.492505       |  |
| k5 | 0.079602       | 0.014859     | 5.35718       | 1.15244*10^-6  |  |
| k6 | 5.86338*10^-13 | 0.000174317  | 3.36362*10^-9 | 1              |  |

```
Show[ListPlot[vn[[1]],PlotRange->Full,PlotLegends-
>{"blood","liver","gi"}],Plot[{fit2[1,t],fit2[2,t],fit2[3,t]},{t,0,1501},PlotRange->Full]
]
```

\\(\\*

GraphicsBox[{{}, {}],

{RGBColor[0.368417, 0.506779, 0.709798], PointSize[0.016666666666666666`], AbsoluteThickness[1.6], PointBox[CompressedData["

1:e]xTTMoPSmViYGCQAGIQDQEqDl8dSvfaKaU4QPh2Dux2qwujV5VB+Z4O3slZ

jAKG8RB+Q6BDzZcDy4KcA6H8MIc/l/y/zWv1gPKjHYo91uw1e+QE4TskOPye

zfY7VdEBwj+Q5CBf8GmqvK4tVD7VYf+2hyrdMTZQ+XQH/xuhm6fssIDKZzk8

/vqkS6EKyj+Q46CV+/VocZ0lVD7fld1py6Xq7+YQ/oMCh63hFmTk28wgflUi

h+sr81jrl0L1LyhxaHj2f3oyzPyECocLRa9Evl6CmqdQ49D/Nlv47i+o/IN6

B1W2wxtFp0DlLzQ6LP6hyCKnbAXhF7Q7yNkxPVLyhtqfMcFhZrSmLH8/VL3E

VlfzPgZzsg9aOuy61fVX9cRMh/2RU5TXmVg4AAAz43Mi

"]}],



{RGBColor[0.880722, 0.611041, 0.142051], PointSize[0.016666666666666666`], AbsoluteThickness[1.6], PointBox[CompressedData["

1:e]xTTMoPSmViYGCQAGIQDQEqDo5vjFmCvewclHw7B5MrZ7OeZaZB+Z40HAZI  
PJWbiyD8hkCHJUxNUyZzlUP5YQ6Pyw4Lyq+phPKjHQI+nrzyTqsawndIcJhu  
8ETJI6kGwj+Q5DBr6lvnfa1UPIUh5VzZt/uzlbyD6Q7SJ/ItlvtgclnOZwL  
uPORbQNMPsdh+Yffkzrmw+TzHTSmaH2bswrKf1DgkKhRmD4hF8pXKHL4mnal  
JlQByl9Q4pB/Zb3k0TqoexIqHCT3nWey2w91r0KNG8ObaXp5V6ug5tU73NjD  
msurCuVfaHQQefVSOaAO6t+Cdgf+SM8LLq9KIfyMCQ7bv7M8aftbDOFLTHUI  
fP9Zcy]vkcOuW11/VU/MdFj9mXmTkEuBAwCNHHhC

"]}],

{RGBColor[0.560181, 0.691569, 0.194885], PointSize[0.016666666666666666`], AbsoluteThickness[1.6], PointBox[CompressedData["

1:e]xTTMoPSmViYGCQAGIQDQEqDunWRj0Z21o6QPh2DlsvbXXw2RoL5Xs6cD/t  
81DVTYDwGwldID+fk0/ZD+OHOSyPLuuo10mC8qMdrFle7u1xSoHwHRicJuvz  
ZvSVpEH4B5Ic9Kpz]/KbZ0LlUx0SKhqa0tpyofLpDkIzmf0ezC6Aymc5bLFz  
CNr/twgqn+MgF1yeul2lFCqf7/A6MDZ1k205hP+gwGHyYfW5HH8qIHfIod9  
y5L2fQ+phvAXlDicWn3u6C2zBgg/ocLB23XfMqO2Zqj6Ggdx96dqXavboObV  
O6i9S08Pl+2E8C800vyW2]sie6sbwi9od1ALmnW2uGkihJ8xwUH6q0Cv3pMp  
EL7EVlegmUl8h2SmO+y61fVX9cRMB++Y4zsOnZzhAABz0nQz

"]}], {}, {}, {}, {}, {}

{RGBColor[0.368417, 0.506779, 0.709798], AbsoluteThickness[1.6], Opacity[1.], LineBox[CompressedData["

1:e]wUV3c81d8bt0dlJMmIhCThWve61vk89t4jK9I77+26FVJZlZDwVQkhO6Nu  
U2ZESmVmFYlSEZHf/f11X+/Xc55zvnv70fd83s9Rt2BLTzoaGhoZ]hqa//+q  
/Rz9EcpBg8mPFuyGHMyDqaz5uuWoCYzWlO3dhVdXIblbMLw66hu2ccfY7W7+

FUjzmNP9wbuOzY21Wd2PzIXBOWXrS1E7WNFB1f+uu+fAxYauugN+dJB95Wqz  
p2s23A8LU/rEywSfjwQxO45nwsZal3ZCFBvIh7GmxLtdhMv2bf03cznBkd30  
1WTfBShpY6/c68cF3ZM1E++M06GezyMgTIMbYi4sRDHPpcLz2DbcB14euMmk  
5SiWfR7efmD/iX0/BPR3g979MTsHn5U9Wsq7+ECSy/Wys8hZ2LvFrh4RJQiW  
0bq3/tsiwWEHD5oxkyNwh0AM3beTDIcmxj+V5grDY4KTlbdIEghfTtOyTjoK  
bxztUIVbApXQl7/D7CcC85f3iss+igP5b+NMHTaioEDwsTkhGwuqN9N8gjTE  
4LjFwxzJ9mgw2Rk/+ZZXHAqW+N132CLBtibtcjrDcRh2/pPk9DYczpyWX1X9  
fhx0G77cnKoNAx+2CfPVMQngMUk4Fl0QCqGP0hrKuk4AZu5uLHY1BOIC5blt  
GyWh85XL7IZqMjwVnlhkLTkjTh1scblBgXAtUV45JEoaRB7+Pd0r4AfF0hOF  
om4yUHyOrkso3wfKJ9K235ngQH5YaHVN0hve6/LhOg/LgmWuzPKPYU8YL16Z  
Ks6VhSBGe7uFTA+YXn+eHcMiB0KPpvvKT7vDvGmBhmWSHnhIDJD5kBus/NO6  
xegnD/rPm/gOyLrAmi2f9dSUPExpcWQFJTvDRu0KQ5uNAsiS7IXtjvBNtOL  
5tw+Bfj56UIHI6cj0Jwp8ArQUIQNwRRrhSR7YHgQdEj3gSLECTrLVdPbASuH  
dvcRaTygZ5Jh/CW2wPV45cQbXgIMvL7+c4DLGngOvfYnUkAnKhN3LMvliAQ  
XHAXlUEJDipY43cGLUC4K0jNJU4JJBp70106zEHsiPY35e9KoGbu/ONhkRII  
RPMVH/Aigr92kKFdlwIID66YfhsjQli/43k5NmMgJBfUIXYpg9a1pKcWc/qg  
MhrkGgeuAsSRW3rtYXqA4bS5rBtVoPqmEEsWjy5op/E9lz6hCgfLlBPzB7RB  
f2olnLIEFaYrsjjKC7TAWOmF2CduNZh5NIVUHKUJFlkFb9sz1KDKb909zkMD  
HDBtpaAodcgbMilankAgkyZZLLeuDqtW9ssGK2pAN8jj+DsSgbyZW00jQVV4  
x7Ph3/obQVHFYK+tnzLcc54Yjo/EIGVBdVV1WAlI5c+Vsd8YzDXd6H9kRQDJ  
DWvzFBWA+VuJo8rffOefUn2g3Q6giDIfabrJwx3Wj/xLQBlnsrA/apyMJx6  
VIhFRQNa05/oeYrLwsOqq00LsRqgwLRIL6orA3cHmM/3tWnAUvnHbywuUpC7  
Fkes2dQAWuOJ0975kpDAs/I1U1kT0oh+hqe/SYC584ilZZsmHH3x68Pa/DFQ

IesxKW5qgmUee5Z1qhillbe3HVTWAtHF/idP1USBvVc6cCNGC1K1apcmmEVg  
81up8ldWqo41V/eeWhCGuf3cl+1/tGC+pbpqqveYIDODT0oql2tCyOWCrVy8I  
ZYmBK2datYH+Zen9soP8cOm/6f80/mhD2J5gx54wXojqtLIRJeoAjdVnHeUl  
HnBZfMnCGKMDMVfCzrTjDoIRm8rDhQc68C2P/7b3UW4gyNUEd2/owIVsJ0vj  
SS4QthEWrvLSBdcDP/MU7u+HX0VMGYEPdGGUqShQhosDjp/Eqptt6IJW9lib  
3hE26J5b/i6rpAet7JJSd432QgOLy22uaD1gvaTadeYaK9yUenPqV4seDN5T  
c8jdYoZ0c92979b1YOulmEdGLBOERbRRHhD04efoPq4qTkbQfVhyLL5FH34V  
Hrf3SKED2WmuD07r+rBQ5bAP2dECP0PqJUQwAERF23OPNGiAQWITE44yAJlm  
4w2v2H/YqlHAT9oWA5Cj83jOlb2NfQyeKp/9bQD/aUocCu3cwl5csXToxBvC  
4LL/fPahTSx/jPg0vdkQWD/eucS0dx0j796L8PtTCBeuJR06WPkLCxA9ImGM  
N4KKOz9pbU7/xGz1csekI43gVdvfeA/xNUzDnzGLo9kIpnYKkn/T/cCksmI0  
f/wyAlxfzeP82VWMP/Hr72FFY+DCOOOyZr9hS1tDTnlNxrD/ZrbCK40lBERI  
hzPmlzFQtlvTcEVfMIpm63N7RRNw/1lbz7D/M1bhdTJaNcIETqhwrt4qnsdy  
M4olBZtMIOh6rn6C1hyWULt/8t9PE/h9ofWt4L8ZzGv4XM60ginQFOQ8Fnv1  
CVPI9/9zq9EUIqU2fPp0p7AXM5HfDVZN4edN6dGJkAnM+B7py6qkGZS9+h2V  
2jKgvQ2/OH3Nywws9AKihHk+Ys5qee9Vy8zg2tH3NLKZ77HPDP+9/jRhBo4t  
PHaY4CjWumAz93yfOXALKbasPX2Ladx3GffVNwd5D4mT1npvsNQDXu/VvMzB  
qyOxpvLYMNYb7T/Ccc4c9Mv7JOgPDmHs4yGvZ/4zhzzC/XV77teYJUT1Nz82  
h3Au5WqyzgCWdzu+O33CHIjfnGppSOrHxIhSXjj+NYeH+WX3Lw/3Yh5DFx/S  
KlnAZU2fLMUXXVgFPqd1xNoCBt/s5xA48xL7VpDXdDfMAh7k/fHeYu/E5P/d  
qIvLtgDXGiHBa8PPsSi3/6pNai3Ab7333KOKZ1j7y/IK4X4LiJyWuemR/RT7  
J119++eiBdSIPXZKTn+Cpf1sKSo4Zgkvku8YnjV+hPWfepgfoGUJ2nd9F4yu  
dmCcD59exVwtofDuDfrPv9swa+GubK5kSzgv+JFnPLgVyz/Xf2m+yBKmDTXC

m2geYONfhtJb2y3hEqG6i+tuM3bUZPTcxfeW0LshWf3YtQmrOjiTIMdtBfpf  
bA4CRw02Evs5hkHeCsip7eWfd+swhcnliFEzK8hTyt1JpqnDYjTXQqoCrWA8  
5PhfYeFa7GH5RkDiRSsocng3E+9YjdHs3fExr7QCNezXYnB9FaYdT0cp2mUF  
Uc/LLc8IV2KvINhO99BZA+tDZeN4rXKMq4jLvkjYGmIImXe2ft3GbGl4bYIR  
Nc7WYM/Tfgsr9BC00HSyhs51pYSGnDjsslve5GCcNfy+URHSHPCfjiltYfDI  
ujVkMMcKckWUYt450jodzdaQL058/mCzGPtuT1R3/WENeNGps6phNzBFirqy  
IocN0Ph3Zbx/W4DFimjhmaWpONrjS51FPkZJ1Zf7aGgDuhmXCEZzeRjdVxPp  
Gh8b8BKU2mdz6Rqma2Z1gpRqA2LVjXXX9K9iGY12x6xu24A2V7nR20NXsAMJ  
7oKbUzZQcyJWYmkpG7Ob9uHr37GBx1e/ucZ/yMKKtIMOlgygo2vouHy1mVs  
uij8f5iyLeDGj6dFEy9hYmyxbDqnbOE/EdnQuOwMzCc0iZU30hYe2ufc00V7  
Aat5e5bxa64tBKRse5VeSMMIxZk72QO2UGp98z7f2DnsXtma4sBXW/DVM4ms  
v3sWE75rG7CX9RS4uv50o00IY3vrhMbOa52CFTGWrfpwEkZqInM9dzkFn/jC  
2fzpkRH11gUDmqRTwPYo1MILORGbflrbGtd6Cpol2sgtv2Ixm5dc3x+8PQXM  
ShIvJKNisN7eq00/105BA4c01222aKz5DcoLlrYDizvnMv+LjcAk35e9qja0  
g2+cfYKTRuFY6TgT45K3HbywjTEMx4VhGfMD4R5ldtCi96TojXgItrsof++/  
x3ZAb2f0/kJoEBaxkyczOW4HTS/FW17XBWBnNpwt7A/Zg47S0eXweF9s50+z  
9DxFe3CTLf3wkd4HM6Q5/uSNhT3Im3ZZLfnhSmyrsqYXrKH2L+p47/4PLBK  
Niuvi5X2IFKsnFf5ww0T4npws/ulPeRKKt6N/OiKsQok790idQBWhSMI9S1n  
sKQjs1okIQcl2fSnUZs9jf0S1Yt/pOoANCe7CY8knbBJKY4lpSgH8MfcTzN  
YI9ZyYUfjbziAN9KBrOKrpzCuvGjdg11DsA5yvBHmGiLNaKSLqmvDqDeY3yI  
+aEVJqFFv+vL4gg1SkXLogWWWLGeN+HuMUeQUqAlsaRZYOnmuDtHXRxBn+h7  
lCRihu1YXxl3TnSEw4y6JbmnTLaw+40DRYWOMPVxrlnwrhF22u0xmeetI5Dr  
m9iis/SxYS/Rdqs1RzgzxX0t9Jgepu+f9iObwwk0HV48MHmtg8lHmLnsNXSC

gemXKkNntLC7MY3X9b2dYI9Gdpi6piZ2OPHQ4PlzTpDR9DxKBK+BMadOqdM8  
doJnNn71TDkIS8jQilQfd4Lp2rMO0QNq2Frm3eq4TSd4m3E0af6YKjZ+PVjg  
t8JpeLhor9V6mlhZFL2xlLc4DYwfmFWN2wjYy1KljOCg00BZsux29sNj9ZW7  
fxYrTsOGZfWOGaMCJl7rLnv85WmYlfrD+2NZDitq6PL2mD0N5NWL1e1zslhq  
R9a7SUFnKPUXc9Ogk8FW/0bH56k7g8jAuHypqBRmp+YibHraGQ6Yod0ecZPE  
nibodzImOkPstQwtdooEJvll1u9RkTM0nvceSVA4jl3Z4eWifOgMzCb7hoKf  
HsO21WmbpMadwehDKWuUlxg2SBnauSfwBj7rnSAf/H4UI+62IVmpnoHXjo+E  
/g4JY2VYmd5exzMQnsiaF3bxCLaXILH8L04MiA7KlARcFcQinoTlxBWegVuV  
ElsNDwWwCRpHgnz7GbA5PptoQseP6WpojS1+oK4fmDIgu/Ni+z5dyK3e5wLG  
Kr8ft4UexID2n0f6YRfQIBVbdAtwY5FHw5Q8pFzAc2j8PssYF1alscAKai7w  
mK/kgH3tfmzS1WFcwNgFLHVGmkOvcmlHyAO1G44uwKLXcIGPlwPTL9NMeePv  
AooXrq4elWDD6mckxS9edAGlwgMbMrdYsQW6kj9eN1zAzeEnMW4PC8YveqBP  
854LRNZtZoldZMLMtNjuCnW4wCFr7HWeKCN2zv1v8FavC5jTuxRFD9NjrWeD  
Nd99dIFbfsngxMI80+3ZrlrthyQVOER6FCwXRYrZzfw2+e1xBBgt5tlX+D2Uw  
wCUdflf4NDKdcYCyjR6LNTkflXSF9ZUIzsc/t9AvbQm5HWVX4HrbQceuu4kk  
PIvoPxi4QplqK9rfulFOnd812TvCqerplbZlNdR7p1zFdm+rnDljXR30btf  
6098gIn+BVcwPfdl/6jlGpJl+nRErMAVjolKXmuW+YE8xG3WditcYcNjWuHe  
4e+oQLfnxVirK8Td/Djqo7SCBrzUrz/odgWp3udmxTbLiC6t3vfKe1f4wGL1  
31rOElK6e0wt+IsrMHGdKXZd+oJKP7N9EmdxA7F9c7RuX+bRCDO5kY7XDZyc  
jXnYLS4hVon185PH3YA92TKhUGsWIX0/u3YlarxaNqSYcwaF+UxK5um5gbvY  
UZma79PobrllTugpNyi9wDX38cUUGq940Wji7QYyJ5SEKD0TSGexNoIxzQ3K  
FY6lpsh+RHGsonqf8txg7Y2qeH/me1R74jrfo3I3+Kr23caUeRTNGuxdzm9x  
A+G3zggH8t8iXr9kSsRLan754YuF2AgyzviZbf70Dbppat2Kt4dRSpW3u9SC

G+TIX3/85dUQWloyY5ljdIei+WpQ+aDSPfX4tc6bnegd6iqdE96hcp2zg4m  
irrDgnA+x4+Xfegfk1Cjobw780UZ3D90ohc5crbmHdJwh1Nj+cmRt7pRK59l  
3JyZO2RzuURXKHYYhbtHl0/XO7lBzOvay6Vgn6scLHzNKcAddNHnHxP05ksDa  
WXgvuoMjX+7v+YzdE7fenmuwB2ailOenvJP0bTFymB9hTukfTOdMpd/gtQd  
0xuTHrjDHwOnh+lkcir0ELlu9Nid1pwSblY/fljWAx/G8b51h32+Lsdc9neg  
WtJ3jYY1d0hgYvajMLSiPRkZx5JpPeBnhbbvtdIW5HVfjNWY0wNslQUkzCya  
0bMiyjLvEQ/AQ3dXysEmdKTc7vW8tAfs073g+/xrA0q4v9bYoOYBlw6ST/4Z  
rkfvWy9dTzbygIpbtZZLvXUou++JM5+vB3yYbGtKga5ByyMOMgvRHsBkVxPA  
y1+N9Cd/HWtM9QA3rRfLRvFViPaHxDfj2x5gFKCmWEy6i5y3nr3ma/SAu0La  
EjtHy1E7/emmhaceUL5bFSX7/jYK48mJJ015wNXmpoxjSWVo4MjJMyYrHmB9  
SGnX1/8/JHmiU5N/xwPixoxl3xKUar8GfHPez1hMrtvrvBLMZpV3WRt4veE  
6wt/ZRb5byLQufKNdMITHOIbDn/3voGKTKWHTlieEJZh0KY6WICsXV3zP9t4  
wkUaqXK0kIfq/P7GN3l4gsI4Te+L3GtoX8S1MynhnuAk0KMLbXUV+STitEzJ  
nmAfY5A4dewK6kztERfI8YSHquJuEay5SCTbfc+XEk+4N3pMGf8vGyUV7Hxr  
qvWEj4KuQ9702YhQLdds2u8JzA0s5UGRl1Buc1++wJgnIGPLVPW3GWiF4pnw  
ZdETbG4wMfCbXEB3hwq0yMxekNNatnYsIRUxjCkcN+Pxgnd+Kz0cuPPIze7V  
nsPHvGB2fP7+wq+ziHeDdrhZ0wtkdShRYa0pKIKmqJls4QV+QoWC/Y0k9JqV  
UGDm4gUsW7HXNBKT0YXDfi6LiV6QKHwjXU7Hi0cY9BuueQFrWYB90Jd4pAm  
rvj42Rte0M3lZOj9MQZtaQyvHG7zArVoGrLh/ihk7ivDerzHC5h6p8zVGiNQ  
eXaGqNwHL6g6z+mVGxCOth8sqKsueoGz9fn0m6phyGpK005n0wt0pmWTa4VC  
URVTSZgZqzeUv2Hcz8Mdgmhk/l6y5/OG1PpvrIaKQag6ofFpoLI34Glm82kr  
/RDdbY7xaANvoHufzM223xfZ9fmvp9h7g86vNq3Jq96odq2L85KvNyAvZm1d  
eS/EyC92Mi/WG/ixSXmezx7ISYOkU3rBG6Szm6SP1LujBp/xM1UF3tDjR2Mp

n+mGnB9cvUpp84Y68gvycpwLapr8XtvdQz3/JvjL8pxBe5hMeoY/eEOroKNU  
l+1p5CJd0Tu+6A1awmtZh5sd0QNrnx8Lm9Tz0JGJ+zIOiD3BlfcHqw80cG47  
0Dy1Qx63Hsn/5f0BWLky88u+pxDnWqQ3h4oPhPNJWEr9skZefMMpfIY+oODW  
GhTzzgo9BJkiUQcfeL6zUjXbZ4m4fDjapP184GJgqLvQGwvkm7XwWinOBxbk  
53+9XzJHT1o0v2pk+IDx4GrH8/3miGeymNG40Afc0gMlhS6bomdSp1Rc2n2g  
n3uVn7fSCPFaN1r79fqAxeN/giftDVFQPEdwxEcfePtYIQ0nbIBelPlfSFry  
gU+Nx+/lbeshgd6uW+lbPvCdGDE5tKyLwn6IUnL3+ELRckOk5aoO6uYlV/i  
9wVSQGLnBTodFOFNZKtX8YUZ3cOfPllrod7Mq8c7DH2h3FP4YHSOJhJu+a7R  
6eALYp/J1Q5jGihqwthp0M8XCLz50s/kNNArhsqoD3HUfPpCjY4rgMSkGHNm  
M3xBu/lZjhUNoDgr13vfCn1hOSg/U+4bQuJlfNO0Hb4w3fSG/ekfNZTQE7m1  
t88Xe09HebBzq6Hh70PcPGO+YP+6xuejuis4JXBCX/1BaE0ATn1KBWUjGUY  
SP71BVHq7cE9VEbvVbBcFff6AcQ0TVewKyOpTM0kJOAHeleX68oCiOj9+FaD  
paofcOuNpP/RVUIyDKdeORn5QcDj7FidpwR07mTjZy9HP+grHCsN1SKgj5Yc  
dKH+fmCqNXVSZgCP5OL8D8fH+4HRwd1DDK54lP5fF+H8RT8g3fpLdv+riCa7  
RS2ybvHBOelaxsMiRZRxaPz8rQ4/OBt2a0FgTQFtZn5+5NbnBxxHbcTPlCsg  
H6afv4+O+YHaGZVi/BkF9C7xn/SnJWq98hrVzYcVkM5vVq/SLWr+5pHmiUl5  
1BRwsPjMHn/wOqST7nhHHonMCb8T4vcHvxWh3+PB8ojmjZLuTWV/uGJR9eE/  
DnkUZKiV5GTgDxVlx08wJ4cmnpq2CNj7w10CfrKwQw4ZKzusfPTxhxuCTXTB  
1+RQe52neGGMP6xXDz5dDpVDJyRCne3T/eHxnFL5H3M5lF+SkMeb7w/sEssa  
7vjyKDLzCtP1B/5w8TThc95fWTTHWIjsu/zh08E+btpZWWSZWV1cNqf2Lwq  
Nfb1y6Knv5prRxb8Qbj+9W56iyySDXi6cGXdH3SkVO4ElMmi4tl+ISumAliR  
PflyLEsWsTm+t+XiCQCa5y8vdCTJoiWD1ZfZ+ABQ3fzRa08ii+yfbv0z0wkA  
2td/oyctZVE3kUmJwyYAdG7cLnDRIUV3jgvevRwRAKGRXXWLOFnEXSIxZXwu

APwfdNA/OCaLyDyKh/ZdDYB91lrB7IdlkQujUVpGYwAk9W5bwx5ZNJBg+9jg  
eQDMhIubutLJlvVfrhssbwLAjFev9/Q6DIX7B+K6ZwLgTYnRkvoiDvHPxnin  
rQVA7oZ0k+kEDl1wOFeiSxcl3fmeU/HDOPRnKGuUkSsQWrZ9Reu7ccjL4AZH  
59FAKCxqUPr4GifePinXOycXCHU/Wt7MPMAhbWJDspZGIBAjV2pb6nCo4f6j  
B3QWgRBS+pqkUYVDR4/3rD51CYTLI2O+J9zGoezikeMpiYHgllZyJL0Eh/4d  
nD4DpEC4mGH/1+kGDgVe/np9NysQrh0NXPPxHYfGGTYGKSWBwGpUYqV+DYcM  
E+hYku4HQphP8038FRxq+8kG6o8DwWEsAjeUg0MS/nwx2wOBYMR4K5ijivNm  
xOo6JgNhUI+xsy8bhxgdZL/ErVDrY3DNO0SNRwypCqv8C4S2onjDaSqe0dez  
22QLgqQijcPD1P0tnlhmtwoGwd+MJY/nV3HoiZJzd7R0ELDqPjN7IYdDMvd9  
aZTUgyCK9/c72QIcuikeSVw3Dgj2k7aXc1Q++4pJlc1OQVAqo/N1qhiH4g5e  
qogIcIIN5kFOvjlcWrx0fVohIQhmRC/Tp93BITuGW7w/LwaBzKvmLOFKHML/  
bEsPvRcEgj+P3Kmn6ttv9XXoaHsQH0j5E2rVhENuTYcFhruD4Loofnmd2o8/  
3KYe5NEg6I2WGPTuwKHMyOQa+YUgWH01GJhNwSGxd3XrM7+CQCeYzdbzKQ51  
EGawK/TBsPf084Njz3HI8vqBC1pcwUBuHVFZ6MShLxvawz+Fg+HrmohVfBcO  
cbfd9bBGwZBNS3PtYA8OacTt2WhyDIZd/kBDU+p9ef9RFTz9gmHGDR++BKH  
glQDLxyMDQalCwzkPS9wiKGoeLgzLRhglCA+Rz2/cHtQICovGFTzoF+KWp/s  
aVpP8TvB4MeR4JbfhkMvH8nXvmsMBrZLfVECVL5OQh4bqc+CwcNm//WqGhz6  
mXQNIIaC4X4TzkKIHicypl5e+DwVDDI/WRQe38QhYfgzfH0lGEQcknulqf1r  
KT1xWH8nGPrkl+/EXcChclKN/DZjCPi97LcoTMSH7K6p6zZQgA5+5xOCcEh  
tU+T8dXclZCmJWkr5oZD6TnRpQyHQ+Dc41890ZY49EaDs9NjNATiBKp0QzRw  
SGitYrFJMgTulEo500FwyK9Mg51NPgR08p1zRQRwiIY+/NQjCIEVoeKqRUZ  
ZNS4N+Ggfghe7fnyn+c7GZTnfrs00IyKK2o3jB7KIKkXbxcFnUNgfDBode9Z  
GRQdEcQe5RkCL75K1Qy4y6BnYswKAwEhIPqi+t9zTRlkf56YkBQfAgaDcVd5



/0qj2/ih0nfkELh69flvlxFp9H3et1MmlwQsVb8eqb0njVJ1b7BP5YeAviUn  
5wlrATS0rqCgVBoCf62LvmPHpNHhu/2nsu6GgITz9hvpX1KogflfKdYSamsV  
Tz+6XJRCow/yOq8/CgHOxK98WVZSSN8Ht7T6IgQqE8KuePFJoaluF4XSNyGg  
K3o0cPbmSSQZu3nqz8cQeOPEthjqdBJFnchNMJ+h4oWpd/G8J9G+jOedND9C  
wHH/U2wkXRKdUnFasvsTAg7aV9/tVZdEZUu/2Ot3Q2B0+R1PzsoJRDQSt3NI  
DwXD5wp9tgYn0Nm/lIS2g6Hw9CyXI2lNag3c0/XffsFQajlc7Ovj10Ce+y4s  
PT0ZChwX9qZnjh9HtX3kqlaFUPgS98tXNuQ4Ws9I8LuvGgr5CtHfPHbEUSpr  
yFKRUSHUNx+XlacXRwPdvIVXrEJBUYpT7Gj8McST7u6X4RgK75XfHjb7KobK  
mU4tRfuHQn+EXyp3oyha6TSvCgoPBTWz3yfp9ogiwnlDP8/4UOAWGMbGTomg  
Lnq0ZHkxFLQ/rQtsvxNGnM+VqgyuhEjr+iZvIbMwsiPL+cGNUOD8kzpW4iiE  
vtAcW5K+Fwr6oMN5ppEfyT4RqhJrDAXi9hzDmUe8KCaZ10+gg4oZ/sV/vs+D  
WP7tXWLpCwXemtQXS0ZcyPwRY9XucChkm4/+E/3CgfITdn3XP4ZCiL7vETzD  
XnTi79ri7FIoTN9uZ7IopEFh7cuVH9dCgSahB3xF19XbYxd8h7ZCgbSnXlIe  
zasb/vmwSNkTBiQpJ7GRwq+P/H4/WSyQDAOf7HSx/cL7KQ1N7ZXZ8tT4l2Fz  
4QluyLz4k2+aShj80bpZq/WQl3Jx7e5ihGEYXNLc4HkQKkwZqf+v0t8yDNQk  
b4d55llQDofe8HVzCIN9FT2Jwa/EKNWrmYtmfmGQt49VeS38BOVxbXqlblgY  
iOn6NB2Y00lRCyL7qseFQXdHb+SctwylfzlyUTIjDMg0uXWbb+Uo3xadFhmr  
wuCJ+ubf2OtKFEKlbeV2fRj8Y7/h8ktEmZLkY+77sy0MXor2/CtsU6Gwf9Za  
n04JA1d/jkYeVksRmZnc7FgMA5sxbp2WQk1K1C2xyoYfyUCJYL0TlaVFobj  
+VZuUuuZlz89kK5NMfu0fzGPNRwCXmW0+p7RpeSX7q28vD8cst20n/1W1qNM  
n2H0PccXDn1yLAaerPqUkMk/X0JPhEPS1/pLh9MMKMa55+U+yYYDWdh4j5qk  
IUVclyvOnBg01b9ma948N6QwbBU/e4yFw7rchc5lKyPKdM3JvTi9cLApMyrJ  
/mhEeejaalVsGg6POFQvdJ8ypuQf1Clisw2n+lHvoZt9xpSInqG5hNPhkMw6

3clHMKGYJzpLL3uEw9MTzU06100oUnJflx0DwmEmaP2r5KoJhWU+mtIbHg5j  
ZY1tw+qmlLl8BmaV+HAoyNr21z1rSnlinGNWSQ4Hnt1p86zHppQiGqF83oxw  
008laWIZM6XENFVNp+Weg0hmx1LnYTOKtY/SiY38cLihMaT6Ut2MInv4RahX  
aTjclXm68cTGjLLvtXn727vhoB5WFPDYw4zy5ewEnc79cDA/G/ql18+M8kLJ  
z6ipJRxGi8zblr3NKKVf16+IUsLhZbqBtlyTGSWh50x4bmc4c08PyM3XM6PY  
WXEeo3sVDs27XQS8pBIFkflmYOhIOBQLBfqwMZhRODtOtEyPUfOV/CMI35pS  
loNa/pnNhoPwweF7126aUrpFtPQeL4XDLVK9vd1pU8rtd4NZMmvhoK3N9yqe  
25RCynB6f3MzHDZ08FmzPjehOKFFYTbaCGj6+0Rtj68JhbgW6ZvAEgGBZ4Xf  
pjGZUL7bZ205HIqA++M6JkISxpR+tsNavUIRcFTzZI9BtRGl4mnFRWXxCPA6  
zyx9SMKI4nLi2WFefASgV7NzD5kMKWoTpp5pahHQ7kn/9q6vAYU3Z6xmXSsC  
punt5+1f6FNe//mF3lpGwHrMfDHRVY9SXZ2Spu0QAW9mVeeib+lS0l3YXze6  
RoBUAjP51oQOBbqPu+aGUPFp9d05ZW1K3XWHs2aZESC7MXHh4BWgXDL63Ee5  
FgFXe3DKMScxis9uOLfMzQjgLsn4Ln9UnSLsffnOvuoIqEkPP686SaRs8/Ov  
xDdGQOELuFF7h0B5P1BO+NoeASKPha/On1akZBOedPX0RMCT8uXsxXc4SsCS  
MafyUARsH4qQqSw9SdEv/mBX8T4CRsxMzpTmHKfQMP1cTP0cAbwObj3r/Uco  
wW+P7dNmjAS4Shb20117ZCeXMxt5XyTQLHLt+bD+Th0ur7SPHoiEulTvv+KU  
bXVOnQe+/iLU9ekVz46u7Ud/SgU0mk9EgltfuxFugwdNbyfz7spGgnammkXE  
EwFU16TflYtR1xdoHfawFEH5nDXF47qR0C234KXoKoZIAfujxE0jYfKDmmiD  
tTjy6Y40CbGjHJA74pQUaQlklfZrRn0pEsoqyLf1lk8gFRLapvelhKMbOK2K  
nJNIZLzsjYl/JJTfZmPWF5JGa1f8yZ9i0Eo8F39u1Uc+rg6aH8yJRI2RjFl  
5huy6JmRolxkeiS8e710fq+CHKq6m8/yOCsSjt9zjDR8Ioeu009MsVvPhJXv  
tlhHSx4lnHF9YFkcCRxSjxPO+SRR0dnZtGdSAhdqFa8KamAjA9Jei1UR4JA  
VfbgdpYCUgzPVJdtigRGWh9B+WUFdHhwjTuuIxKORZZZZ2GKiOHkqeXnz6j8

su/f88pQRMupHc/ZeiNhYvyf3Z5XiujtzJEbp4YiwW9uN7efGY8o6FzYf+8j  
gUFOJHtXBY/KC78Yfj2KhBvGb1N/e+FR5rrxUfznSJB5ml5DcwmPoizr/ySt  
REIjb7VKeBUeOdcefN390xKEJ2o9Sp7hke6euLtcO5Hgn0/jNjqCRzJek0lO  
DFGQMclpG/gJjw4907Qt3xsFUQJmdY1f8lhG6K70d64oqt6SQdtLePQldi+j  
Cn8UnPtx4EMBNf76bfD42aNRVH8Ue3ySmt8qN9L4SiIKDPz6sgRG8aj0MvHi  
IdkoyN+00b/dTZ2nF4vcXJWiIobtj7TeFjwK0aFVuYeiYDrpzrnp//DI7j/P  
/b91oqCTTB9JzMAj2On5gkyi4lh/fjZYCB5J2Ms8SbeOgpmnCXs2rPBok3Mj  
6LB7FCTMfPh7nQePZglcdb38ogB7wj21Z10R9XY/FqwLjQJDxebv1SOKqEFM  
7PdmTBRkdb/OeN2giApJ6f1apChYSvbQ+Z6tiMjy7cup1H58ZnFrkUoIj+i  
RfxoZhQsmPmdjHBVRJZXmy2P5kWBskzKkyO2ikjlO5+k/80ouPvY+WajpSIS  
MU6ibb4dBZYcA+LF1Pieipn3/+5FgY9E4dNOav4avV6dfmMUcPBkDj8JV0Rj  
Z+6l5bZHQchsBEX5kiJ60cFxZvxpFDtd4Fv6WKWIqg9FEMR7ouCvgV676aAi  
uhr+ni3kdrSEb3ZfwTYVUCkg2nzbaBRoNfuOnZLAI1cVOruyqSjoCLb48MmF  
2u87Xb0Zn6Ngn07qblUxHu2Pt6xz3lgCtyG8u44EAa3PHxLV3o2CKYEbq6rh  
BDRuPnFNijkaLE97az58SkDl4j7xOzzRIDILH257K6GLOdIr80LRUEGwDpCn  
KKGQ7TWXAfFocCj56H6Vh4hUhhN1SwjRkDRgLCTcR0SDiVf2a9hGQ3G0wAFX  
JRXU9MXu3AnnaAD9w4eLslVQoZXQxn6vaCj0q+iELyrI40Tl+ExkNCQ+C8rf  
n6OKDK4GmfUlRoMc831090+qSGZX4Vnj+WgY6Ujt8pFRQ39GKHfPXYsG4Sss  
WWMP1dAEdo4/8GY0LL9oXQncUUPPqgwu29yJhrlz+07uEtVRxUEOglQTDWUF  
U78eDVZHI0kjYeLN0VD+qmrUp0QdhX0tmGd/FA0XPP/mefWolzvbm3YbL6Jh  
qvLv65pldaT+VKxvqj8aZMtkpIdYEBKRWILvHokGDttDVu6CCDFfv19XNx4N  
bK+IS+snEFqmJRQtmIuGh+w8hUIyCA0HqOSILFP1E5HfE0iNPxjdZfH7FQ2e  
nJwzEQIIFWl2xltuRwN5Sr6nmX4hck3GigpDDGRcF/T++0kdefOau4ruiwEe

sHIvaVZHxmcPjuzljoGmaVtPvSR1JLfyUfeXQAyske5xp6qqIx770rZx0Rhw  
IRjhXVIWQ9vPPaU6T8bA+UkrPq5cNfRj5mRjJUIIMMN2reXROUg29LPi+P081  
BnyuedS8b1ZF1Qwt55K0YqCz46ztLQVVPUR/MysYuChTPQ+sqQKctRhmlBy  
pJ7vrtI4cE8ZQV2fmbA7NX9V796GrDLam2qL/xEWA9q8mV9bdYno+3eBig9x  
MSDwcNkVjSqhd46f+J+RY2Dh+afzcf5KqFQugOZKbgzM7RuT/1FMQOeL5MLj  
C2OgyppxiRcRkB/zrx7WQw8Y006NzSNR4oTKX2KDTHweVro7mtZPOLT100C  
7TFQTavDyTCpiP417KtnfBYD26UFU2WZiqgn/Xreu6EYiPThZ9vZVECaX1Zz  
ID7EQNmUOA7XpoAe6ulfzp+OgcmfjzRV4xVQLdPmWYfVGBiRPX73GbMCOu5l  
kdyxHgP8fyTvywzLo9L0yrjD/2KgpIDlbVsij3LPOYRO7ouFzIprzrq0a8mjv  
XEMAxh0Ll5r6d2d55NE5rb0+pQKx8GNUzrt6RQ7tlLm704rGAvNM6xprjxyK  
onvo7CYZC3xlXju/7sihVVduh+dysRD8GZvxPC+Hfj4G2IgpX4JNisG2tbcc  
+iTcaX4eYoEbSy9vN5JDDiRB4wW9WFhfpVHLkpdDb6Yi9fTMYkHHvfVQn4Ac  
MsYGNcTsY8HYp/GqF7Mc6iwWR6zOsWA1sM7m8FsWoX9Jyn6esVDukTZ5c14W  
PTg9qtgXQOWz5esq+V4WyT7CyUpFxiLtmVs/NvplUeXh9JOX42NB142490+5  
LBjJmBZflcdC1bB0udIjWXRjjChilhELfcnpMjWWcStmiNYlxMLP4kmI0da  
ZNHlwKXe/QWxEPiKtP24WRYxbWlwh5XGANmfHx4A1mUbF/I8eZuLCR06hHk  
O2TRn9a1PYr3qfV1ze38eiKLQnmNmK61xILBDD1TU7csWoq+Rbv+KBbuz1VW  
eg/LIvfRv9u2nbEgUjymxTIpi8YJ1n8e9MfCt4mbuMyvssgmr/on70gs2lf/  
7vqxJYsGfjOsxo7FQR30Z++T++SQns3ppY8zsYDGo/0UjsihJ03N86pLsWBo  
Wi1JpyiHGsk9xnf+xAJr+wHzt25y60QbyqgzTRyYW5r79yblodvyh948Zo6D  
jydEFbzz5ZBgbvCAMEcc0EoEjd1rkEN5P7p6UnjioCVy6exutxisBDunBGM  
g0Gj7ZX0MTmUXhfzROtYHPX9ZfYpXJJdtjxDHbel4uBsROit4d9yKC74xANG  
xTh4SbypNbkjh34OpDR4qcbBM5/V9WY6eRQg87GmSzMOjNT7fZIZqBPnZfIK

CcM4IKxe13ahl0f03zJuX7CIg1MPWvBju3Jo1Hi2ZMkuDs4PXPr8748cMq9W  
vWHkEgdXA5MYWb7LoZ69V/OqvePA/tWqyuM5OaTpv5zDFhwHVeI6Coajcqij  
V/tyUFQcODTMFAx0ySFFyZvpg4lxAJVS/GEtcqjmwu+zsufjQFY77YzDLTkk  
vmiSnHMPDnY7bA/WZMqhEv3yuLURVH4GuwtZMXKIt+JfpNWNOMg+Np8s4SqH  
9njfDzhYFQcF1ZtN+3FyiPTWh/5gQxw0x/6rD+SSQ+taIoXc7dT4rdKQRv+y  
aEb4WteB3jjgnXAW8KLev/aPcSjCS3GQmYs726lOvc8Gim371+Kofubi4sIR  
WVT+4JvZ/i1qPUY9M610sij3qksi55546D+//5tTHg6x0PNzc3LFA13mgz0e  
bjiUFPqmioM/Hmil3I8Yy+HQR6lGhwi8RCj53kkkh6H/Ex137NLxsOhbvZd  
9EEGTT/cDWKXj4fL1+oaWBtlk03JNkZ2IXjq+35DBp8jg/oLworYN00ho1nY  
+2iEDNJkkVJgM4yHN6PZ5jJOMqg1ar5nn2U8JM+rTXUYyCCZ+WKXFQ7xEPwy  
klISXQbdrLb2OsWDxZulx69J8gg/mf7M/f6xcNo6dDv40oyKFu2T2xvWDzU  
+ubdjkyYiKnkXMeeuHhIvX2SctxEbiWwlcs95HjgVJ4h5LvLoLX4jS+sGfGw  
yb6X/gRZBvks1SWz5sbDD7YNHpvKGTp58fDWhgPFYIbXiep/Ky7RGtYyuLh  
1TGnz05cONSLn9Biqalux59ScYgh+B23kfmhng4Qsk3pCnDoRYu81Dm9nio  
EuTikd/ElakUVhbmZ/Egu6fwR460LCpbfVbM1Es9/8XxN/wesoJXOQHPNBwP  
dQ4j1fzFsiizH9/P+DEeCFN3jdzeyaK4yopNhqV42KDFDupryKHvh9yyGdbi  
ITNFU3MjXA55pQocZ9iKBzlc/PqH23LI0j3Tmn5PApjSPtx0pJVHkoIR92kl  
E2A+tCcLyqnv+0VpXVr5BHiz/II/rk8e8WwtjNOoJABRxEbp5Ko8ohu130Nj  
mABHk90leeQVUIzOgf92LRJgNy2W3tVCAa009ivt2ifAHnbrcj1gBfQxG/P8  
55sAbtaph3fKFZD57p+/O6EJwLoeaffpiQJ6GdiQuxObAFdH7WVTPiigBsNj  
T7YvJACboEzbQWZfJNE2abudkwC2bi0BAocVUfHx/G9/C6j1VLk9/YdTRBcZ  
9gr8rUyA8wynrEjWiohdoAje1ifAh367/lkPRZQtj+11vy0BhO/4cZhT/S2X  
PuXihacjkCx9ReIVmeovnc3q3XsSgj/pg6g71Q/zRE6/Ux9KA05BTTb+m4oo

/2Lo9qEPCZAtMfp9s0IRFbVe0ev/kgCFbIXvrCmKSGhQLLD8ewIEf3j7fapL  
EZXON+eS/iSAZYstvuk11R9v67Y60CSCj7Zo3Yf3iugO1/sJRZZEeCOqGWg3  
TeV3wpeegzMRWn61xRA/K6IqbEti8VAiKJzKmUz5poikbC+aPj+SCEFFB6rU  
fiqi2oDDETePJ8Ili9jFkD+KSPZsTUE0LhFqTlwwF9+h+v0C9NhCKRE2DuBW  
PGmpfqFuc04kRl1fp9dPYMSjBy9d9jDpJUIWYWfj/1jwSGXiB27aNBFEUw4m  
1OzFo4c/yTbttong/3vU050dj9Ae7virzolwsQjP08eJR0+E75QGeSVCOQ++  
YJkLzSVCC/1gxJhkn5ia5Abj16YdH0ViUoEOwZFvUTqfKlRybd/JzER8K2Q  
sX0Ij3riFgmj5x0h8DHraxs+PDLOiXOqv5wIVe3XxHL48Wjg7l7yxWuJkGbw  
9UqLAB4Nj0i/wu4kAuEW288pQTyy/kpZ46tJBLPaz1s/hfDoHa0576+mRHj2  
6o4JlzB1nuL9pD7wMBEa/jPd0DyKR2MyYe4VLxJBq/cLfaYIdT7Uob9A7k+E  
/M9xyX9F8Wja8Wqt00gijBTsjbpyDI/cwo6NEMYTIcc4rKr1OB7Npbds4l  
ws/IA+sqJ/Hlq0TvyNeviTBrojrFQ/VfX5rfa3f+TASnvWZqQMAjv35fv5K/  
iXBqvnG2Sh2Pvs1sZcXSJ8EQ1+A9Q13q/Ld5sdlqbxK86GX0P2COR2scgmPS  
B5JAQvvRxx8HPloQr6VhEUiCrWYHiVXqvLuuhonPiCSB4imtN4vheBRj9dro  
oWQsvHYeHxhPwSOqTQnNk0+CXvqLPzqy8Wg37+xDQ80keEJLYWSvx1P9NPeM  
mGESNHTvu+1DnYcZXtxh3rVIgiUWpudJ1HmY5UeXZaNrEvANXRqv3sKjDGB7  
mMu+ScDUNXe2mp2A9gkt3fQOTYJjXAmMSqIEtN9o36JAShLMn9353mFCQPX3  
zJPPISZB1/vT47J3CUi2Lk69G4SeNux+d5+SEC6Hflj+4nAZvrqSG1YQIK  
G5pWGnyUBDEJS21NOwTUuxPynW8sCeiO4RqrrZXQNMu14oCZJDik9GtU3k8J  
rR9oM368mATamReWMPovkIlgkbaXHnyT4oTno9l+lEoqzzXG9fzAZXusGuQts  
KaFs12Y00sFkWKA73a7GRkTlAR8eWYslw7GwEK75I0Q0TD7KvyWfDJL/3Te7  
pUVEXy7rdBurJENEQl3sHWsi+pfvG1WikQw/NEgyzJ5EJHm/fljbPBkynhGe  
PT1LRND+lnT9VDKcLFibZ8olltvOTZk152RgyTkudK6EiAJeC06oeSXDjyW4

jKsmIvKYxsWswGSIF7hrs/uAiPIXPJVnIpLhWs/LgsVnRFT748JnxYRk+DXI  
mjDXT0QvtmuupZ1NBvuHH4UW3hLRGP0w1seMZEg/fPv23AQRrXGt/5DKTQZI  
eo17N0dELEL8pckFyaAd3DtTt0REQieQ6XBpMpxK3J7yWyUiRUW3bbGKZFAh  
DBlsrRGRIZZaFX0/GeqPN2ra/CYiF8Mqu96WZEic2vctdJ2IomwGmAQpyeDy  
Vd9fl4ovuaw1BXcmg+CHoanuX0RU5s/j/qw/GaIIXIGrP4jU77PK/oMjySCd  
E4Gv+0ZEAynOj73HkoEh2t2R9gsRzV0iB7bPJIPmV7XG79NEtHW9XIBtKRn+  
0jAmzn0gls5bvT1nfiTDvKJzmm0blip2Yr1CR0OCmizj9pIuljrhJrB0j54E  
bXTicaFUvZq8pTVsmElgLcUH9Y+ICAvE8v/tlce1+W5NxzYi6g2zWL3LToIr  
qm9b/ZuJyCbGXdeCiwSegTPvJ+uJaDox8ubWQRKIruR8qKslv+zab9u8ZFG  
Zvb8j4l7RLSeXmBklkiChxEup9wqiSgl817ZujAJ0i8+11C5S0T7rj7aLBEj  
wSEay8+ud4joesGguYEEcbp0a5Le3ilikZJPd9d0kmDISTTKKS0imts//93A  
kaDsqtXpnP+liFjFaKujQILNzzP7h0uJ6Pn9QzUrBBLs+9Sva0bFps0nGPJV  
SLB25zYPEXW7DtaaXNAkQcdvl2xeKo5YVLgeZ0iCy5Yp7/5RcVLUumq4KQme  
GshZNIp3T6Nvm/a3JIHA9iXNXOr52dnx5z1sSZBt0TmcTa2vUBBJnnYgAa/8  
Xpnq20R0u4pm0MaZBJXns5KnqHxqlj6Hm7qRQFnx7NoxKt8nFvqPMD8S4DQT  
Ft9T9eid3ONGDCLB2dDZ56pUvd74v2KSCyPB/RuJAcXU+75w3tjCjI4EAST2  
t2b3qfMv18Hf/EkkWNrj/fVqHRFtlowWHCCTgE+2JeEltR900oVoXyqV76hU  
01QDVd92p1mGDBL4Lf19ONZIRDx6R9J3LpMgxsZ6WXMTER0Z+SS1nkOC/ate  
qz7U/kq43h5auUYCmXqP409ULL/iFfW5gATPE5MC9VqISIdl+fH7/0gg/64n  
25yK7URCWXsrScBfFN1wmrre7b5C7bMaEkS+trofS93fX23dsqOe2t9ZXml9  
6vkRPa0bjc0kWD1lfuoFtd4k2/ii6jZqvTwn7Rep/NJn1TXuPKLyYfl4uqGG  
iHJCaBZuPiWB/YHMbH6qPoU7zzLyOqn6CscfFqyg6p1xHpfVQ4J/h3qkmqn6  
1x7SH0l7RQLzT/XLE9R+Pri9J5Y0RL3PHu5puUVU/eVeCca+pfK5wC4xcj2q

PyXrWegHErwmzm1epL4/I0aW3n4TJGi0PyjRdYmIjt5z73P/RAKPkeGJuFRq  
PzxH6xznSfA+20S3LJnaj7UCG+tFEtBHt1wixlD/j8lOW8bfSDAVhMaJIURE  
z3akROcHCdxceFyKvan6H7/9hbBJgm67oZpu6vso3OR1GbdDglaH3+l8RtT/  
p8YJeQnaFHg59fi+nQYRqTnWxvOxpsCUQ+frCmmqvlmt7Nu8KVDlt/3zCSMR  
3d/oV3xKTIGRm4EONs1KiG73vWCUGjX+Q4CGsVoJ2TLNM52EFKgdEjB9VKaE  
trl33l/Vs4EsXFGaSbYSMPsXTvSxTQEvhfDvBwKUULGyspegQwpcakuxk3VX  
Qj9Ax2z4dAr4UTbrXRyUUL7Z6aNqnilwTr1hgs5ACS0EXO7kiEgB9hne/Ijj  
Skglod2RXQKVMvo7bU7ooQux9+5HhufAmnL6600h5SQYsYj31lyCpxs9vJ5  
zqyEUu5+Y3uQkwJMRo7XDZYlaKR2c93/Wgrorvk4m84SkEQL47RwQQpo73BU  
Jo4T0MALwYaM0hR4qtQS6DpIQIdnTGyd76fAWQ4lRc8HBBSyaI8daEyBC3dm  
r8/XE9Dz754S3S1UfXI0um9UE5DfbuKWHCUFlr1uKtwvlyAKU8bswtMUCDT6  
BBzF108xe17/jc4UWE52e1xVQECth2uLGV+lWKPXFU0FOdTv1h7WvvrFKhf  
bNxZvUxAZ06+DAkeSYEgo3SntAwCapAfthd7T633l76KaxoBMalMan4Yo9Y3  
w0uTfl6A7DWWTmZOpUAit8ChmRQCqtZf59aaTYGU9LAvF5MjiMac7t/GQgp8  
UtOcSEwkIKtT7j+rl1LgG67GuS2egMqd+V+7rqTA+pl3b7E4AtryFG/jWUsB  
477pe1yxBGQSKF/W9zsFIGTVQCGGgEoj0EXSZgqImhzjuxVNQL/iDSPwOynw  
PT08RZ2K9c7anl6ilcPVtw2PbkQRUGGgm24JAxkGrV3p2yMJaCUnCGfNqgbj  
V725hREEpFkQx8u6jwxtjKrVWDgBXStNpaVwkOHFi52se6EE90Vu7lLYATLw  
DzknTQcTkNr94jfHD5HB50flg+lAAspuqXo4zk8Gh2XJhFp/App91HlnR4gm  
penS+4x9CSijfyD67zEyjD5eyNp1JyAnx4u1uyflcHztntpHFwKSWdKbp5ch  
Q0WCskDaaQIaZn5quY9Ahqf9UTNutlT/pNUoLahLhqN2rd4wXQJaHgr2OGpI  
BhPOs0o4TWq/XaRuHDMlw5qI1+MRdQJyS7rDImNLBo8GxrwFRQKqbLs+i7zl  
QB6TzI4UIaA4fWt+LT8yaCSwsvYJEpDxKKeFXhAZVLG3qcJ8BPT91wWKWRQZ



ApX3GEc5CIgom1DgkkoGc3d07Wc7eLTnMfG1RwYZsqLfH/TZxKNxk99Mvplk  
2H9A+J3YbzwI+QdFhOZRz+fayFtZxiPLlcl7kYVkiOL4akG7iEdiFz5/ii0m  
g9nL4yGEEtzqLncxI5eT4cMVbaMDk3hUiBdMTa0iQ5/WhWdPPuJRwIsPDzNq  
ycA8PbW/aJQ6b1jl/cxsIINMcxxPBdWfcs5YSl5pIcMnjks1n4fwaCaEw/V6  
OxmeqOk2nR7Eo6bdvus3KFQ+6WPMbK/wKDUzfaDkGRISsaTzf3rx6JSgDuPt  
l2S4X+uyR7QHjySquadUqesmQJtlcntVF9c8qlLDqAWr8c00xvMSj/p64yrph  
MvQYJvood+JRsz3SdNM7MkTk29QmvKDO01F1Jo8myUANviSy8hyPFq6c60hc  
IIPb7535e9R4q8jCj54lMlja/L6cSc3PqC+TGFghQ76/6Kd+6v50cObM8BoZ  
3p1r/1/DVR4XUxufK9IyVlptKskoXXmzszp6KskkTZSSZaKkCWSEgq2Zlqm  
nYQQUUqSVEIoLdoUrVKh0EKKEPK9fz6/e+9ZnrPc85TuqjIDo4b5yS3j4Xhz  
eOivP4IXzLuttmMiHO+PDp2uqSX6ZyhxSvdkOF7pGVqUSPLNOOZEvZOIQDPq  
zJ6cJmIlpU/8GFaBEZFB27ufmUGdmdrMgdllzBBcVmmXrsZqOrz3nyRj8BX  
Oj+qOK/N4KGNmMNPpQi0054Td/qdGUieHtWV0YvAwMxbqrtGzeDNO9WrEwYR  
qFZqdcNy3AwKbf/THjKKwFv/hfjpEX3gj5eo3mAegQv39bP1JczhWYrZvCTb  
COwWxU28m2003NwQGU2/CDxVZzbzlTnZJ68nB2lXI5Cd4iBvzzGHN6AXYHAj  
An0a0tU8yP4pvOT4cX5OBlamHFbbE2sOfv7p7ycLlIAhrXRqItlnz0ZXdpWX  
k+eN4XP7c4h9GU79+vcR+PyOBE+/xRy89+Q4WH2MwOSu9G1qneZg3vCqxmQo  
Ah2uGcXI95hDf6Jupdk3CNrTmx3u/ET0iEbVo9dT2Pifcm7QQqI/pCym396p  
zcabjX4fGzUtQH/uiSAIPTYuS28t/bCI/G++fjYrN2BjxcVCibHFFhCT3VSi  
bszGeW0XNvStsAAIjdTyFmRjzXMze6OVfkd7053HtmajZ4nZqy5rC/DoOLHa  
2I6NbQbbi8PsyP8qcWt9tCMbwyhd8QRHC9CVWdxm7c3G7/kBxRNeFmDXn5o6  
upWNLo7faAY+FhDwVG5zui8bDz8K+LWK/N+i0sPU1+1io9j8Q867/Cwg98RI  
7+89bEyoDnTr2GUBjR7bMm7sZ20tjXPbxb0WMGrx0m/jITaaurt8vXvAAsxH

7w3mH2Njfs9pC7UAtwbFuf6nGRjx49xn2qir0JvntsvH8FGZ632HDmOBTz0  
O/l9l4CNG6d9dNtC/r82nbb/NM6yMf3rMrnPRH/5FRU9rk9jI2OT4n9v8iyA  
n2TAPp70xj2XWi6JF1lAraO8TFsmG/NYVUWtzyzAtfzV7NhCNl6P8j8a2m8B  
O3J26P5tZmPz/aSc7UtowBW0fMxqZeP9tC/tG0xpcN3fLtu9k42PpyXcdWXR  
YEjTcHnBWzba9sR5+TmS+yx5jL77Kxu1RfuSU4NoEHEyfG27PAfPqWZpKpTQ  
QOd9xuaW2RzcH8UzNHlK9JVd5d5mJQ5qPSseMyZ6a+psuZg6NQ5KDPx9cZ/o  
q4xgows1Why8dOpUMPST+7FzfW6LgFafRR0WcSX0ZS/WMjDnZuNRKcmaSR  
+hW9eWjMwYpTnSarptGhcm/H5/vmHFyvkt5QNIM00hbqMwuBgxoKTj9b59Ph  
+rmV6nesOPhKNXf2SS06rBbbsSzPloOyP6dQr/XpIKi+7pi1joP14cdqsk3p  
YGD0fEumMwdrX894rEzR4Xn88L6MDRxcsi2029CSDnt+zDx1yYOD6ruODn34  
jw5yXsaiC94c7F31NNfGjg43y1zTz23j4A1XhWErBzqsXXQk74wfb/P65gW+  
dqTD58izZUkBFHfzqlPRT3oUOMZ/vN8YHcnDjMMul1Y00Ri5vemIPctBf4bm1  
sTsdGu6JfY0K5mCywveEBR502L9AW1wQysH51oekEjzpoHDaZhYvjNgTF/eL  
96JDXp+/Jjucg1MvuAQrb6bDenvBitNcDnbs1/mnRvBI7s2VYQIO9jcsqbxK  
3o+b0+B0LIaDW2ZpJV0n9oxDvm4NiefgCeGjZTrEX9PrOQcPJ3PwaGLpZkUS  
z8GV5uEHUzkoDH/RF0LinX3NPX7fBQ4OZhfGrHGmQ77ssct7Ln0w0U9HXbCO  
Di77zufvusbBAzLNm1fY0+Fb86MnflkclB4InQU2dEikvW3ansvBOu+XYjmE  
X9PzU9/55HPwx4OU0VA6HV6J641tLuTgg80ncjKM6RDst3qKZwkH3RNZP3WX  
0EHp+e457g9JvxSjzk6S+hYui9F2e8LBEbVl7vqqdNiYmGfi/IyDHuovJtIV  
6HBm83cXh3rSTyGDugd/E334RHnH6iZSXy/LT0EjNGjXpQ7ZthD7hrK+kqQf  
Q4Ve7P86OLiBk/NZ+zUNVEfCEvENB+dNEXbUNTgGxPVSbustBwUrp574W00D  
z+KnBVQ/B1NfhxrceUyDtHDpV6afOehzpv/HZaK3mB8M+laMcvD7yIWYVqjX  
utas/W40zsFPip19XKIHW/L2SRpOkHpe+XM/5yIN1BTjFRdPcrDA1DdldSoN

Hh4tWKQrwcU9fsG1G5No4P2mxUx7GhdtXsbdeiWiwaTVLxsNWS4aqaoklRF9  
cjFz/oaF8lyc93LvC8VIGgi4vKyWWVw0XblxfBrRK4d8xyZjFblyWtW4dn0E  
sWe9xWW1ChdPBh/K/nKKBnbazzMIFnLRfsPrt2/DiN6TsPhzX4OLX4luV+qd  
oMHC3svrD+twkdnps7T0GA2ky+SvGulz8V/K7Q/nQ2kweiH014clXJQtNKqp  
OUqDZ170lz1MuGhso7ThL9FD51QN1tRRXFzy4cNeK/Kc+yvpIhe4+CBt9cln  
B09vE/9macXFAxNBuXxiz+PeXrtfNlxUlhNv4BJ/1sntafmruRjWJSh4eJwG  
Rodtvu5ey8XDodnGRiReFdfbNoucuFj3+c+CZqLHpposTH3jykUXW5VV2adp  
8HIW50cUdy62RqWyC0j+bSPfrJy8uLi4XvXGEIcGTxp8UmR9iD8lU74TnwYp  
0TQ84c9F6U9ny89E0yB8T0ai+W4u3hCqVgcT/vesUfj0JZCLOjvSWkISaIAy  
H+02BXPxXd90z56zNBhgp7xbxeEi60iQkRjRpy+3T6GJR3LRY07rxcekHx5Z  
7YsqieKSe03uXhLRu4liq8yWJnLxg8hl0d57NGAdH+f0vsLFO7rLdNMqiR73  
3Nb5/BoX1fN+Dtx9ToPZVP0yThaX90+00cYGokd/XG37cZuLhwwjlSXaaCAK  
cjPoKuPiZNL77jksX87Pw5LLueiQCzlcQgDXasWNrsWMVF79L7pS++0ID+  
Zerxjw1c1NxY7mv7g+z3+v2Nx5q5mLv2dWv3BA3kc17rmLVy8VF5/REfsp/f  
BhTUZb7hYv727Fh5STrUrtbQ2vqWiyuuVOdaSNPhnn5UsGo/qU+8gb3ldDpc  
lvpZ0/yJiw6snWba8nSI6t+uHj3MxYhbC6x7ybwGVzQE2X7l4tC33tVH5tDB  
J4NR9e8bF91UnFXfkDLBPijzQfFPLsboS0VqzaOD2bY5Bw7+4aKf0bldJmT+  
dRUH5VTEeBj268h52QVkX1Q9uf5oCg83d2Z/yVtlh2nHUq39pHhYL/jmoqNO  
h/GlB3vkpvPwwsOZD7dp0KG/Z/Xx0/I8TFI6XzNAkw6tCZrzPGbzKtTcJBG  
9k2V7a87Yko8ND9TnPGc4KJfjY6ZKjw8KM7P1tSmw9ktp3jfNHhYVndkmjzB  
oRXLHq3U52HdjQOaw8ReQliU58clPCy+5nBmlPjzXNI9HrOMh+Nrtqfmkngc  
3hTGm5nw0HI90Hx1NTow42KMXpvz8G/uwla7ko+htV9NOMXD1jwZGX+S78If  
LL/FwEMH/14nAeFj0mv4fLAND6nCNQt75tKhTN9hxixXHvrQmz43kP9IXqf2

jXsbCR+st+nz5ehwKea3tbcnD53C6nQCZekQ/i3rePY24v/Y0lx9KTpYI8kM  
2Rzg4ejDdtXfYmRfB/Xyhg7x8JuU4Bb7Hw0W6RZrJ4Tw0F5J0kiZ9MO0qJ2e  
PSd5qL3K5dtGsm/HAX9wI3hYukbryTTSPx++Kics5fGwrf0059FPGLRtrKwJ  
jeFhxQalCcdxGhTjXvTTjOfhLb13y/W/0+DGg2CJqiQe2tkG7Jr+jewzbV1K  
8TWPHyy/ODj2lfRzy99X99N5mPvG7v4vss8DIl8d2JbBw5MXMs5MJ3jNF/aN  
W9k8HFQO4LuS+4J52ctmwy0enr/ToBE1TANDN9PeP/mEj0XdTY1DNFggLXfi  
SiEPzbyTe7Uilrv/bp59CQ+NHcdiw8m8/Nl7v2DkAQ+9P41pjAzQYFgjYX3K  
YxL/wuTW3QS/aQ4YYIXwMKirdfz7JxrUc63476sIVrn3OIZgkfOlH2GtPlwr  
XtEVSebRWU3MX6Wfh/sOdl9iE7w8QYGS/MxDcZmTuaMEy0trzv6nYe170qi  
75DvT1jdGO//xcOAVP23JsTf0PEVPa//kv6rbxmsJtjzXnF1kzgf3X+tFQsm  
8dZ8XXmnSpKPokSlwzSSD92wJu2hDB9jVlovziL5X/dz5hbM4G0l+MNX4oQf  
5Usd+7Jm8THnWc4eGbIPuj3bNqUr8rGwV6FEn/D5XXHQKlmFj261++b4EP53  
rA8yjFrIx8l/zvW3RmmwsiLi35FFfGTpVz08S+qX92/6p72L+Vg6c/dFU7JP  
1KjEpu1L+ThXt8DiE6n/n9yMq45mfNSu8OhL/00D3Z8MY23ofHyM1VczSD91  
aN8NYbD4KPPiX9BT0n9FZyrW6Nnw0VfxQ6wL2Td6zWvNFq7m47bS6/wK0q/J  
M1rU5qzly9tm1z4X0s+Hwvu/TrryUTxYqFE5kw7L90idadnBx/H//H4pkHm6  
eC32d01OPgZK+e7ZR+ZPvld595M9fBSLi/syROZ7yE0fcg/x0fj10nFbA3Jf  
Wq5+z2Hz8fU5mtwJci8qh76o08bnY31bvGcX0IFbsOnegSg+Hs309t9C7sUd  
iwMEMxP5WNO9R7aG3Icac4TLzTL4eCF0bOtrHzrErp2juuQ6H5cMOLQ+9yXz  
yzs3RfMmH736nvZcC6DD6z/ZLXIFfx2coitcYjcM/21x98/5aOu9Yb3elw6  
zCyRr054x8ehZX9Ed6+R/RTYM27zgY/vCyM4Fll00KWdr/Nzgl8TtpUJWTL0  
GI1yO+U1SnBXRNaOAjq0bEmzWCQeiSf9Xx9b+pjEMzfQt3VqJF6/t/YXs5wO  
dtWWCZHskdhZeWIAKulQbPzu8/DMSGyNmP9KtY4OaZIG1wrVInH7wAauRRsd

3Ep+N+/UisQF9yu9ujsIn/vqxOfrRmKNxITYsS4ST9v+zSeXRmK4c8aWmLd0  
2J59b64dMxLjglRWGAyRe9zJjqJ9UyT+fvDij+dfOryTVL4t3ByJX+6Gf3f9  
R/yVfHzD2hqJt+Mn9lmLUyCvE0Vd3hmJihswRUqSgq/jTV8DjkTiWfbSAG05  
CrKyM9QXHotEmra64asZFGzzCV7bEEb8be6oDptJwctqlRsm3Ej8KHbLpmQ2  
BUVpPj5/EiNxS3jHr5Z5FBxwMo7JPROJMie13BxUKTCYNrXUJy0S3evN+0vm  
U5C2L1054gp5v6xiA1uNgpNWN+uj8yPR+iDXsE6bAtuPx1jqjZHImNkd7rWU  
gjCdySKN15Fo2jhgEmdEwV2fU6ZabZE4w8p5weNlFOi0s5cs6onEdIfd++YY  
UyBeE62yZCQSxwTNOxzcMjTFJIMv5HnPuzkNAsK9lvFKxj9jMSsmXN+5tAo  
eFOSLLVCTIBy8tP9qygKlH7MizCeKsCsat63FwwK1pqcmzSRFqBFZO3mj0wK  
SrMvfjdXEOCGpLbZXpYUfPugeYA2V4Cv5uurFiEFS3QyhujzBBirljvLwIqC  
1LTr75gaAoyTC7Rba0PBizaDLAajwIoVy//7a0uBtGJOH6W+AOVX0a+W2VFw  
JPr2C6vlAiy6u1zppAMFudUma61NBTh1dWZPyDoK+iULq2xoArTEw5ER6ylw  
DSt5ZlCcdKnXG65ypcB439OcdesFOJjgARLeFARK2yxe70riOfCPecCHgksf  
KjOc3AXYmLpAemgbBQo+tedcfQQoZd0YKrGTguH1ryI99gvQaIFozqWDFfw3  
/uDrJxJgGTVdTTmSgu7AXb3+iQK87qvVNi4kfGUPeu06I0BR9hjVFkMBR3vE  
ZU+6AKk/Lw+cTyT9M/fXyoN5AuzulOxXT6dg4bisWlijAGsGi8eCCynwmPar  
Z89LAcPmsy2eV0zBGaUPVzzbBNgrYeqWf5+C2RZPF9N7BBi9bUIWTRnhK+SY  
2bcvAlQbtpwMqyH9wt/18+2YAA85Jtysr6Ug4szG+y9+CPCJgqnvrAYKJotM  
Vt76J8DgQJfYvc2kXr8GHQJmCjGq+vGffZ2EL9mOmZvmCPHrBprJqi4K9qlW  
Na1SFmLOow+Zct0UDFAZ7ovUhejR29+35S0F+mvi58/VFuL2oyuOD72jwNfz  
1BsJPSGOZWUN70ijoOeY144eIyG2nlEbUPpIgvUvV6DsRD/M51r5/iJAs80  
2sADcyH66hnNOzBA8r2pm30TEmJ176eyY4MUtJT03X80hPinqfx64BAFc+sk  
TARWQuQHMM1XD1Pg1DXyPcRWiL+V6xtkP1MQM/ymyN9eiN32PzrzCa79W3ts

wzohPj5o9hi/kPk8yUqo3SvErRtPN5QTnCGem2UVLcS9ZhKjegSrawmWayQJ  
cTIDfFYEwalWfoV/04RoZCd5a+YIBW3OrkeH0oWYPmOBzk6CFbdbMTszhFhe  
aB9aS7Bz0PJ/1deF2F/vzmN+pUAUofak6KYQnXpnaBYRXJ8gx8nME+L6oysW  
Wo5SMD1jYIVygRBXaAmdXhBsV/BRllMkRjB/24TAMQq45S11QaVCfNI8Waz0  
jYKnL8tF28qEKDuWebaaYLG+fBencpLP+qvSv08UHJOMbTeqJfmMlgxq/KBA  
QvSsp71BiFcsFg0NEyxQnfzAbhZiQdCQ80IPwveyveMdHULUM+Jr8CcoKNy0  
Zg7vKxBPMW+/0ThJAbwPVzUeFuLTqkeqp/9RUBFYotk1IsTNUvPeJ4sx4GXE  
4uUmP4Xo9utcUpsEA77mSK3tnhaFbMwtyJNiQAJN0IUgG4X5X56d+yHNALGn  
wZ5m8lF4R05p0lqWAfjtfbuEile40Lw2e1SOAYYS5VwLnSgM6Or5mDSbAf4b  
TpXFroxCrdEj411qDPjcc6+SsonCx6Etp49rMCB495f6PrsoNPhovUNdiwHs  
U95djPVRqNKw6uqBRQy4nMWC+OAdhembL7tbGzKga/KnCR6PwubJGAGbYoBL  
5oHMkUJi3zvA/pQ7A9yLN/0ZKInCXUxaqMiDAd7PVzr1PYzCmlm/76V7MSDg  
y6zf7c+iUH9qam6ZDwPCLfLXPW2JwqR7r8p+7WTA7crR70njUbiyUwYMjjKg  
sL3DXjQRhfzJl/oHmNA6eCTi4LJKDw7rall4wQDqmYmrD45LRrrktY1Tj/N  
gJ6NJud3KkWj96jFlhI+A2Z+DLJmmEejrm7cY+cUBsyd8DxrRkXjfp6NtMJZ  
BqjKWX9eBtHoP/q4vzKVAbrL557RsY3Gm6vWlupeYACEFAzO2BCNzRdtJdly  
GGAtSENpj2h8PNlsufgaA+zT2EkS3tHYtnvoyq1MBmwoc7X84RuNzLN+0plZ  
DNgr/T2+53A0Zi7ddN46jwEHVbs+dByNRqMmD4W026S+hhXMVyeisSOg4Mhw  
PuF/fVJ/NYfEa/SxLuwuA9LOmFF3kqJx+9iFIT4lDHiuH9zLuRuNhUa3Rf89  
JfHfzQxlFkfj0cVHLzHLCb8r2+eMlUajxLjHA+MKBsh6MG19ykl+Y0qXlCpJ  
vEKJbKqZYOmF78pqCH/DMYe+jETj/bcV1x68YMC80LIZ175F4+XfxjdSmhiw  
c9roNa+f0bjqsm/v/mYGSKm7tVf/i8ZnvGcnNF8xwHb9fMiQj0EhU3vFyTYG  
lOdnSm0yjMG8xJut9t2Eb8v29JnLY1BPGBqs380AHc9lqWcmMejyvPiwVC8D

przfu8eEEYMVyhYaNW8ZYKVo+mKGfQxKBLR/8e1nwOMjZalP/GPQi6HZoPiZ  
AQpTR0207o7Bxvrpd1W+MMBHpF23bF8MjvjP0dUclfnXg/svLTgGl6XqmDJG  
GYAdDjuOcGIwife75ul4Ax4y25caXolBXL03bbUYE+aeD5ZvvBaDQa6iQ7Hi  
TAj40+dLUFYM2ptsMeyUYILSw3V592/H4LazE/ERkkzYa1luvKaM+N+dWj9/  
OhOeXNw658vTGMxVyjsRJ8eEeWL/xuIrY7DaY3HuDHkmlJfR73bUx6Cn4ydf  
1VIMWGB1yyKgKwaj1s1K4Coz4eBlh3nyvTHYr1fYbaLChCqJgZ+338dgfeeU  
Ox9VmXDoqU7Jr8EYHA5i7t+lxoTn1qnMyIkYlKxJbK1ZxITQVZyV15VjkWt8  
eHixORMaM7W0HObH4iF+4Zg3jQm60mUSI2qxGMdYIjxPMaGpauKphW4sins4  
jVhYMmGx/X7bStNY3PRaQrfPjgltdp5r+p1i8XC7mcwibyYY5fxcInCLJfp1  
RVSHDxPYM5LljDbFotXBiBf87UxYXt9Yd9gnFt1vF35o2MkEvqPtesl9sfjW  
TENLNogJFs4r3HSiYnFhL6uOxWWCHHUYqllEvuf7yxXzmdCjWXdbNjEWnd+H  
yywVku+/7pT/ei4WbS5qJP2LZUKHKL3yQXYsTt38fYPTWSaENcykNj6PRcnX  
wzdLspjgG/zTvuGWFSKWInfe5MJehezk1nNseh9+q2wNZfwEbhqTLszFjPV  
15l05TNBU/7kzZGBWLzgr3LmagkTtukemWkjKUJHmYBeVjUTHFQvXAMpEcpV  
Hlr9u4YJ5vIVLJqMCB08xAwLapkwfXz2niUzRLirb0nRvEYmFFTkVs1SFOGZ  
mhdOt1qYIONbf/qNjgi/F1jlL3rHhOtX3L4dsRbhFwNp/8ZfTLjneinH0VaE  
L8/bpin8ZslzyWE/PTsRXj4WYuX4hwnv/dntLWtEOLG/Rb9qksRreOehmYsI  
42d50mZNYUFqgULk2FYRzrvMibecwYLoiucL950Uieehyy4DDRakBSu32p4W  
obzB8eWemiy4qbddpBYhwiNVKZeitFhQEzkhUc8V4UByVdVXHRZMW7f4o2GM  
CFetHllQuZgFp1q4+QNpIrxybMPuHBMWHPywcpVfiQjTfcVt161mAb72zfQt  
FWFs73m7N/YsmPkiUsr3oQjPnXOTPOBA/JW8qNz+RIR7o1o2X3BkQV/0Vrut  
NSLsu+3lo7SBBE6mp1d7dYjQNWGPW8B2FlieLlvjPCHCS5+MHJVPskA++H22  
0x/Ct6uicdspFrwOkJZzmhThVgVFt7PhLAhxXV/rKBGHFpYacgu4LMjX63FY

KxuHwVvX5mhGs0C3/t9a09U43KXgbDzvHAvk5luuByoOY291/11WyAKx0l7T  
fGYcqghWdxTeY8FYWKPrL1YcxnkMVjKKWdDxduumgpVxqD3sEm9ZyoLMLPY2  
g9VxmL5KWmfExZYUTWHINzjsNguawF8HQvMh2b/GNsUh8uH7QNH61mw+ILn  
0ReecTh4Tb30sZEFChLDJ6K2x0HUgYuHxJtZ0FU9kyfhH4fj59dlQhvJZ5Pb  
2c+H4/Dr8j8nZr9lwZ7pF+bXHonD/KlvNZjvWLDlQf/5G0fjCmbSuoat71lg  
qxlyeceJONw5femsS/0smPMpNbuDHYecYV/v4QEW5Ib0PHiWEIdyD10kb42y  
4F3K7rcXbsdh3ltmfbiAB0mAdJBd4j/+RmyLAmAxoadRqvuxuE3+7Sfy6cA  
lEr5hX4pisPqVSOBCyUBko/4zMayOCzNWXJeWgbAfqObVW99HLZWK5fpzgLl  
U7K8rD0Uh/4MCc0QLYCwpNnbruvGo0mV1Cb11QCmhz8ZZejH44xrfXoce4AB  
17LfFw3iUS0+zHNoDYDb3MCkFKN4XBCV8unhOgDDhOoqrnk8ytdsCTzkCtAu  
OrXM1zYeJ08rh6v7EHtRn/9o+sVjVESiwq4QgE/hNSnnrsbjMeb7KYeyAeKK  
b29QXpCAR1jI0tf8AZDpufH8eFoCPnwalM7ragnWvAVGQtVEzNBjbFTPs4TS  
Iw9VtESJeHfNyE6bv5Yw1f3A/cszk9Cn5IVduRZC5GmX/mxuEs6WitfPskVo  
WpI3ufl3Emp2TtwzS/RCot5/2uv9NQI7NyTmP4CtntLuc/yUh03XW0CJ/hEOS  
KfdXTUIGI7VHefl7ERS7T4SsmJ6M5SpP+lp2IbjHrxmdOj8Znf7aJB7ci/Dm  
Z39fNpWMmlMW2884jGB7S8PtGjMZTVfqXRASfMvXozwdkhEeqbjlgxFONdVd  
TrJkXuLUqzKyRxA0bxZsOWmfjOI3MxUVjiLs2BLE7uyRjDYLrafSTyAMViys  
+3U0GWl+is1TuQgh90PeTceSsVZn6q5ogqfldHzJOpGMSjctzijxEDQSU2Z7  
nU7G+YHHKwz4CBu2zXJ/yE9G7RUf93sIEMomp74LT0nGj8yMwtYYhGSLoz/T  
7ybjf8UCd8czCDrZ9oL3hcnY90J0/BDBt9VuzH9QllwXTtDCBGcRaiX9ILCU  
vP9xbG9VKoL4y+6Ixfqj+CNUvtzhPMKe/c3ySU3J+FTdaPzIZYSVN0p01EaS  
sbdgrHZzDkLRRambS0eT0XlTrUkvF2F5sqsJ61syqg+cbR4lWC3i80qvn8l4  
oud7vTAPYcJLa0uqWAo6R76uqL6DkK8gOKs0KwUD5z29HFxC4g3ZJD/TOAXf



JH4QnqtCOBd4LUnNNAULos7r8KoRZvuOLTAyT8EK8bDOoBoEMefoJWupFMyb  
LXZ9fS1C15LHdkKrFFx99mW7ciPho1s/QsolBYtVxGUftyLMaDksq+yWgsKJ  
z1dutSGwa5/E6W5MwTqxV6pp7QgHi73SbTxTkHVd5VxgJ8K6BNGDiO0pOB4V  
/OzXG4SKyC7rBN8UDH2qtLi1G4F5yqD2sn8KXjrUsCW/B8Fgb3nH490puPuA  
qs22twiXts/a9mJvCno1Hfpq/g5hnof3p559Kchr07JX5j2CaH32/pEDKZgQ  
I1XUTrDUqp8//gWl4KJ/Uo2ZfQj/A1yjoVg=

"}}},

{RGBColor[0.880722, 0.611041, 0.142051], AbsoluteThickness[1.6], Opacity[1.],  
LineBox[CompressedData["

1:eJwVlHIYzOsbxju0CC1IizYtojpDRU373FNTKW3aEEL6VtpnaqaaZr6FlDbt  
jUJFZBeRtHBEyEGySxuVpVRStMnxm98f7/Venz+e57qf+37eV8M/0oOYIyli  
UiU8/78tx998Z8qI0EQ+JBXcCdtj68n+eHmI00XL/nGu4bO1FRJbVKMvclZp  
CUvcHB0CnJEa0G//XXGCNuUb+bT6ohee9pt5ZXJ+0xrDNz/xa/FFRvWDy0tC  
5kDbiK/ZZ7sTVSwW9YOiOMTanaklU/6YHHvA4HGkYHfv79OfBoOQtaXu48k8  
WWx6tatuASUEZXXSZxeELIb8XYkLm13CcEUpIIXFlwNd/4B7k0sE7sbXrWlX  
lMcexi6bRYpReNUuPU4bVYDTznVVyr+i8Nks4HrlAyUE9e6hvGhjYsGMtFUM  
RxVfHvh5e26KhopvgEiHizo2kKo2KZIXUOjq/FCetxy59QIRiysxWJ6VautF  
auCFdnOSlBsbulZGpyRCNGFA8aDm9LFhNNwp3uCtBUPxhj6XSA4sjqUGR9C1  
wU69r9MyxoHL7079V4o6GN/9F+tNbyx8LqZmHRRdiciGYicX9zjs2G70zWJ0  
JZR7+2ZQG4dgqS73bx2rMPpuzdQSxXgwb6ZWn3igC23a3CqN6Hhww43kfK7q  
QT9Ci7zVEo/9ql1syTJ9DPX86bZU4qKQb2QWxaHA/bFEgfgFLkopXSVA/qvx  
RcNITvcIF5VdqboVxdYgfGrC+QIlAW/tldbcUzGAwSK10kvBCegsHekpzTPA  
vAHnOJXyBlyfujsTN88Qzx9ZUvVfjuCjazHdgzTE0YcewVJiPlz8Z1shFmIE

7ZOXNor68TDmo+TV020EqtW5JyNTEJi8NCJa570W86kvm30v8DAR3lyT92gt  
TjvCHb8+5UFkR3FgGH0drpzawrP9zoNobYSCfe06lK7gTifL8iEpw2hRpxgj  
Ku5TaCuFj8X/jOi+UDRBoAT+GfLnQ16h+d2FQyb4V2l0eoLLh3JkcUaKKBW6  
Lx+WxeTysfxBhOVOLhXX67VIXiUf2uqMYbNRKt6WPDxQrudjVaxS6ZJAUyz1  
LeAmPeaD8nTEdbjDFfdlXxqd7OLDJLH4cvkDM9AzP5unz/Jh/iZiF9fKHio7  
N/LC55OgrWEs9rpqji1Bv2d9FUgwUpXuUnQtIG/zrWanFon1PSPREmUW8NUs  
dM9cTcKZ2qz9Qc4SDYVz9wyaktiYXfyqPt0SrSZNL1JsSPjSGNQIjhVYw7nb  
TnuSWJ2qV2o4YYVI2Sfszq0k5jyVFfvJtkZPa5Lvjt0kXstPht74aY30kltr  
LEJInPfreP7ApoGzcSCPG0UiqfKuGe0nDTldZgYrOST0Jr3c95oDcVGIU4J  
JOSUW+bu5gLGfQ5NQ4kk/rO2qGXUA20elgHyySS++F8K0ZkBisia3tZUES9T  
NNTmmdPxrHWQzWDR005gmcD8XRkjOmy5h0icbpV4sCjOjokrWYCi3JI5I1x  
TS9001Fjk1/1JI8ET37k6yEzG3SquyhXF5AINN9VFhVvA3eTFWynIhLufi89  
POps0KxzeM4RAQnzfQ7i66ZtsMtI307MYRLalfV1S81skVx00JlTTEL6X0r4  
ZJwtQidvnpUsITE9XL68/YYtIFVLEkLuXyT3sn7KFt/tfjhZQm41Tk09asoA  
PbKhLVnIN7bMmJNxDHRI+Z11FfJfjvJlJhsMTDzMezss7J95/P1x+hQDmkFp  
8oSQOfc8vbVM7VBYr9dzXahn58D9eWJxdpAfnir5KNS7Qcq88V0tHVobj8WO  
C+cxMbwY2TJph/0ix7N7C0ks916udY5qjwdalc+vCef/cVQ8PbzWHudenpg/  
X+hP9+14K7dJeyT7TrjkCP1r6R8aNaA6wEmxIkAkm8Sxv19s+nHdATxH47QK  
of/2jWUrEq6vx6B24VcFYV4G7xe3b5tYjw5JZqbMPhLLRFMyrU0cUZCnLzsj  
zPfbhrDxv647IqhkVu68MP/DHaZNB2ucQPz5ReSySOz7cz4m5KcT/tHdMbx0  
uD9hWuqrnl03gFVUc6ctnAQ9VCxbpmYDvr/p3DAeTGJw5tm2omvOKHvhMPPN  
j4TFstCpiquu0FkwwZNzItHcyx51/OaKTQunygQOwv0/n/Tlm54bZun9yYp2  
JPwsi95anHADN7ZupRyE/at2du5Z745ab8/tE8YkAp5lNP5F3QjZvcf8+Bok

zi3t5RnKecIm7rOF1JTwfZYe+p3T6oP3FR47+k7ykdKQ/bpb1Q+GrzVOv5zL  
x+Cg27x+sd24dqXFZXgzDzP05yMqdYHY2jo7d6YxAekKnQcqGkIwUj1/x22F  
BBiP1x1kno9ATfaSiw7xXBAL0wab9JnQa7uZXfclHlHdU1+YutFYVCOhynaL  
R+SrFQsZYmwwmXa8vLtx4D21/Fj3hgObPwc/+lnF4eFBQdHrZ3Eof8EVn74U  
i/lBVWFLz3FRey/SWYoSiwzRBcq/zvJwQGw8ansFB8tOuScml5P4PtQ+5KLO  
gWuNruhh8yQEJ+ls7ahko2ry8bom070okflZV1nJRvrj1thfK/YhPlz/Wlp1  
DMT2jullrtwPT4VeXSlqDCSoC64EayXDZG2H9LHb0difuM+IXfoArs3arc/1  
ikbZaWUfVekU+DkOXpXoZcHYfwmTNZuCW5emtXnxLHioiQQpfUrFmCKUDZay  
IFMv/TC/7yB8w+JbW84xYf8lwUq9LQ2vnEhatSMTqhPz1ci2dIwOuj583huF  
BLHs9tWPM6B49wOxMikKnqeZp0evZ0L1rAlvpU4UHq3ifDhQk4Vju97kR2VF  
4pZlO+XvikMIXKNWYd0TAaqHobd2ZjYMuIaHlptG4EyF949YRg70ZzjMlpRw  
sD7THQLrc9Bg4MSe7Q/DQmWau7V5Lnz/ONcmmoWhTxDaW3olF4xu1t2fR0NB  
Fi72P60Th2eJFhtaxEMxs09fwZFTeUinHOfwg0KQW3fFR0ElH0OhZbUar/dA  
8v3ZR7yj+djWPJ2rZblH+L+rrM5YVoADqx72R50JRmPsLSXNnAJ0WLYertEI  
huhmZsMjMuj49JK/uvKckLbX89P5lEJovrHVIWWD8Fz/8n/bfxXi4KpTKSH5  
gfh6T/XjdHwRqNndGTXSgaCfrddWgy3CngLr0PJCAjfkjC5QxoqQ98Tjalo+  
AYMir7VWP4pwna2zJjqXgNr+Efq2qSlcvzPZZJ9FYGab5o4SEQFqVK55jiYT  
qJZNL5ZfjEA6TVPLJYaAdtwWaRkjAdouOrhSPAkciagsVFsngEw3S1R1I4HF  
xLjKahMBqmbqhxe6ERDxyNJ3MReg8UzWlmEnAl36TeszbaS4c+pS4WUbaKU9  
q/ZLeAqwYoB9BEYEpf6z5yt4C9Bgjbd3rQGB5Md3cnU2CSDpklSss5oAq25b  
ud1WAWLYl/yI9Ai45ufc3L9bWP+h07tLg8C9tC5GPiHA0j/+z56pE7BM0nt8  
lkiolyMn8b4qAb3w5ndNoQI8vN8afVmJwPHdi/yfhQuwve9V3SkFAoq+fgPv  
IwU46cA0OrKUQI77+ahRpgASeke7cpYQkHCYmvwTLcDY7Y0NKYsI/A/J4e9e

"}},

{RGBColor[0.560181, 0.691569, 0.194885], AbsoluteThickness[1.6], Opacity[1.],  
LineBox[CompressedData["

1:e]wVkh041AcAx2/WTXm5sBXFnUaZlyjyUs257+U6bc9wMSZ5aTgaebnkEHnn  
zjvH3e9XGaLUTUVtVpdWWFmWpZeh27yt5G0yoShlsz8+z/e/z/d5Ph8HRXvw  
VSgUSuAy/6/jb08LwWoKK62zYr+4kc4aLH7WOCnsZ2UMvSy78NsbVuodeux5  
4XPWo9hEn4BgNXQN7/iyQPiO5dfb9L7ZyXWYn/mFkyzUhJOtuCnZ3hSF+xTP  
Tku0MLNb+YXtE3NUKWhy9XAdpHg9GY48ZomfExVblHprQX1wQV/b2Rrqb2jM  
I0I6brHF7ZOLdjDwDaH86WoIs+meLef0HaDb3/dXtWQDhMroVbDfDjOmzRnV  
cCMc8Cp9bum/E67v+iy69UzA2ezy7Y5EJ0iP2eyIEVrC1H+SzdVwRqVl/wnj  
ICvo3fMtakxzRl2/6G2P6xZcXPo9X2/OGX2VU4OVkq1wC1X313/MwdSScy01  
3AZ5ocNH3GRc6NycMnukZw+qabXEd+4z+LI4DIFCjKIVUV4rt/FgJTKvtH7F  
RM1Ed1PHNzyodGIRX8Y54fNm56yYah7qA/ofjsWxcOdA4s1Yzb1Ycvr0Cuca  
sJWtUyQY2Qtew08eHopd6Glsvrxe6om5ig/yIq9wYcfRW3IZ98an6yMWar93  
w8sZnWT/JH/YVxa9K7nnjc6aKpHjrRDkNBf3DNADEJGqyBqTH46JCfeVw9Rg  
eK390VHuHYM37IdTBopQNCxYLrQZxSJpty+7tjkcgezjfrHrhLCbVYgF9VGQ  
3ze+uOFFAvgauROtFgKcunzTffSchJiBhTGBWSziBxgqDXtSEN29SYNDjYPv  
9AZKBj8NyV20zxS9QrQHoqfQeDo6xISs50ECnhoPWxQPZUAtrOHQmu+OoiXs  
zrvHalnIX6GuvyhpXoXeywfnudlyf4aXmIWdgvzGoHFzYQ7cmsxWkDvToK7R  
2vJDnggN8522rdvTkeDGf+/fBjHyOu/FL27KgPueQ49PN+eCmj5jsuqTTHxI  
xCpNe/Og6qB+6aBxFrzKo7LXjOYjMzXDVUnLRsvzB1yTwQJUndX3ptNyYGAT  
f5AxUgi7oA8Fh9/mYKvUKGtTTxE8GJSwdSMi1CmFbRHXi7H6Gq2j7KkYKwdt  
Svf7IIA7lsQ0vJ8Lx5B98q5fSkB/pcZluZ+HjiXei1FmKZKoxUqrznoVFw5

vrmhFJ5nBWenfyzABO1ewbG1Etw1Ff6V3VQIQwb1tHqWBDcclZaba4uw2/3A  
VdUxCRw8rL02FhRjvDGo1mXMpyr9ZqL55Tg1GHPmhsXynB4l00Seq0Em8U+  
kxVq5dDQZ/GcdpZioPonhnpkOZ4SEU8qL5WiXH+ga7i9HClSnaBzJhIstWh3  
6NKlGM/4lTh5RoLzHwVq5SRIUaq45K1rUAbxVe7o3F0pVg3J7yZXlMH287oE  
n40ycEQGVvnry9Hq+XSNYaIM1+NvrDMqKYeihRlzpF2GFT6C5prVUnTLF4sE  
egRy0z1H6nOkSjt+7xw3mMBDi8Yl/0UpjihaeNr1BP6+Tf/t9bJn2zcq5sx5  
Amz5tY2MaRli9FdNXXckcbVK9bzljAzzz+nKf5gktsq+3Mack+Hi65Q6lxYJ  
RuYU229Bhhy+9ZiITeKNn1HgCQoBE0u56l4uictaefXahMYjxQo+t1JbEzY  
R1ttQ6DFufPtUBCjk1F1UoYtgV1qNAetEBI6/FkDK3sCtL2vPVI8EhSPQgvX  
nQTCVz62+zaMRL9F6578XQQOXlc98dUherJB00xVTwIeX18daY8jodkTp6br  
ReDkmckv5oQksjrbSk2+IvBkYF76cQKjwwq/6t37l/+sKu8nHSXhVlbyU+Zy  
Fyfr+DGrVBK3c/s5ZXwCYbRG/v40Eo5p5p01Yctd+rpvi9JmEfe+qM1gsCQ  
y6zVUCajU8HaQQ8iCUhCph00skno+QaMD0UT6lp+Zrw9h0QJrz5mWkBA06x7  
JlhEQtVIYf7fWAJt7m2ni8Uk/gPvPbvl

"]]]]},

AspectRatio->0.6180339887498948,

Axes->{True, True},

AxesLabel->{None, None},

AxesOrigin->{0, 0},

DisplayFunction->Identity,

Frame->{{False, False}, {False, False}},

FrameLabel->{{None, None}, {None, None}},

FrameTicks->{{Automatic, Automatic}, {Automatic, Automatic}},

```

GridLines->{None, None},

GridLinesStyle->Directive[GrayLevel[0.5, 0.4]],

Method->{},

PlotRange->{{0, 1650.0371}, {0, 1586.440158}},

PlotRangeClipping->True,

PlotRangePadding->{{Scaled[0.02], Scaled[0.02]}, {Scaled[0.02], Scaled[0.05]}},

Ticks->{Automatic, Automatic}) \!\(\(*

GraphicsBox[{{},

{RGBColor[0.368417, 0.506779, 0.709798], PointSize[0.6], AbsoluteThickness[1.6],
EdgeForm[{GrayLevel[0], Opacity[0.3]}]},

{RGBColor[0.368417, 0.506779, 0.709798], PointSize[0.6], AbsoluteThickness[1.6],
EdgeForm[{GrayLevel[0], Opacity[0.3]}]}, PointBox[NCache[{Scaled[{Rational[1, 2],
Rational[1, 2]}]}, {Scaled[{0.5, 0.5}]}]}]}},

AspectRatio->Full,

BaselinePosition->(Scaled[0.1] -> Baseline),

ImagePadding->Automatic,

ImageSize->{10, 10},

PlotRangePadding->None])      blood

\!\(\(*

GraphicsBox[{{},

{RGBColor[0.880722, 0.611041, 0.142051], PointSize[0.6], AbsoluteThickness[1.6],
EdgeForm[{GrayLevel[0], Opacity[0.3]}]},

{RGBColor[0.880722, 0.611041, 0.142051], PointSize[0.6], AbsoluteThickness[1.6],
EdgeForm[{GrayLevel[0], Opacity[0.3]}]}, PointBox[NCache[{Scaled[{Rational[1, 2],
Rational[1, 2]}]}, {Scaled[{0.5, 0.5}]}]}]}},

AspectRatio->Full,

```

BaselinePosition->(Scaled[0.1] -> Baseline),

ImagePadding->Automatic,

ImageSize->{10, 10},

PlotRangePadding->None]\)      liver

\!\(\\*

GraphicsBox[{{},

{RGBColor[0.560181, 0.691569, 0.194885], PointSize[0.6], AbsoluteThickness[1.6],  
EdgeForm[{GrayLevel[0], Opacity[0.3]}]},

{RGBColor[0.560181, 0.691569, 0.194885], PointSize[0.6], AbsoluteThickness[1.6],  
EdgeForm[{GrayLevel[0], Opacity[0.3]}], PointBox[NCache[{Scaled[{Rational[1, 2],  
Rational[1, 2]}]}, {Scaled[{0.5, 0.5}]}]}]}],

AspectRatio->Full,

BaselinePosition->(Scaled[0.1] -> Baseline),

ImagePadding->Automatic,

ImageSize->{10, 10},

PlotRangePadding->None]\)      gi

(\*-----  
-----next mouse\*)





{0.3575112797365835, 0.08143316377978886}, {0.4516394623155443, -0.007347854733426912}, {0.5394859823491253, -0.08816932746972758}, {0.6346872009943513, -0.13787329990112937}, {0.7281522108132057, -0.12816574147938434}, {0.8153355580866803, -0.07001063326902106}, {0.9098736039718, 0.02121659675083076}, {0.9999999090909091, 0.10024804094746914}}},

{GrayLevel[0.55], AbsoluteThickness[1.5], Opacity[1.], LineBox[{{9.09090909090909\*^-8, 9.090909090880112\*^-8}, {0.0874367476365131, 0.08090369567458766}, {0.18222810297558026, 0.12746559200130417}, {0.27073779576926765, 0.1116266937044405}, {0.3575112797365835, 0.046963725126600256}, {0.4516394623155443, -0.04509050859182233}, {0.5394859823491253, -0.11115559892361665}, {0.6346872009943513, -0.12642564594664163}, {0.7281522108132057, -0.07740196037964171}, {0.8153355580866803, 0.004179083230780074}, {0.9098736039718, 0.08937493944143977}, {0.9999999090909091, 0.12834702174618903}}}],

{GrayLevel[0.55], AbsoluteThickness[1.5], Opacity[1.], LineBox[{{9.09090909090909\*^-8, 9.090909090875369\*^-8}, {0.0874367476365131, 0.07984396759533968}, {0.18222810297558026, 0.11939549826670079}, {0.27073779576926765, 0.09184904274707059}, {0.3575112797365835, 0.017913117173780694}, {0.4516394623155443, -0.07109962300031061}, {0.5394859823491253, -0.11717052830989395}, {0.6346872009943513, -0.09879571259704382}, {0.7281522108132057, -0.022693471356141894}, {0.8153355580866803, 0.06128703302641453}, {0.9098736039718, 0.11605625481609519}, {0.9999999090909091, 0.10415981267620744}}}],

{GrayLevel[0.55], AbsoluteThickness[1.5], Opacity[1.], LineBox[{{9.09090909090909\*^-8, 9.090909090870287\*^-8}, {0.0874367476365131, 0.07879243663407876}, {0.18222810297558026, 0.1116081822210312}, {0.27073779576926765, 0.07372482040530459}, {0.3575112797365835, -0.006267252216927747}, {0.4516394623155443, -0.08743897872291118}, {0.5394859823491253, -0.11109134853087661}, {0.6346872009943513, -0.06371549528296311}, {0.7281522108132057, 0.02544576624054603}, {0.8153355580866803, 0.09464282937855747}, {0.9098736039718, 0.10731931496853601}, {0.9999999090909091, 0.0516787429232188}}}],

{GrayLevel[0.55], AbsoluteThickness[1.5], Opacity[1.], LineBox[{{9.09090909090909\*^-8, 9.090909090865543\*^-8}, {0.0874367476365131, 0.07774905743802465}, {0.18222810297558026, 0.10409673959866513}, {0.27073779576926765, 0.05716133039337165}, {0.3575112797365835, -0.026084496726167965}, {0.4516394623155443, -0.09591154799603378}, {0.5394859823491253, -0.09685594593277226},

{0.6346872009943513, -0.02730376120671303}, {0.7281522108132057, 0.061646715198529656`}, {0.8153355580866803, 0.1046634148537508}, {0.9098736039718, 0.07509702498429204}, {0.9999999090909091, -0.006536873471333553}}}],

{GrayLevel[0.55], AbsoluteThickness[1.5], Opacity[1.], LineBox[{{9.09090909090909\*^-8, 9.0909090908608\*^-8}, {0.0874367476365131, 0.07671378556951527}, {0.18222810297558026`, 0.09685439581479163}, {0.27073779576926765`, 0.042069810325321415`}, {0.3575112797365835, -0.042006785469922474`}, {0.4516394623155443, -0.09808544986431629}, {0.5394859823491253, -0.07760167026270944}, {0.6346872009943513, 0.0063643674428021085`}, {0.7281522108132057, 0.08405712128907425}, {0.8153355580866803, 0.09555213349985489}, {0.9098736039718, 0.03202960165577907}, {0.9999999090909091, -0.054402034659985464`}}}],

AspectRatio->1,

Axes->{False, False},

AxesLabel->{None, None},

AxesOrigin->{0, 0},

Background->GrayLevel[0.93],

BaseStyle->{FontFamily -> "Arial"},

DisplayFunction->Identity,

Frame->{{True, True}, {True, True}},

FrameLabel->{{None, None}, {None, None}},

FrameStyle->Directive[Thickness[Tiny], GrayLevel[0.7]],

FrameTicks->{{None, None}, {None, None}},

GridLines->{None, None},

GridLinesStyle->Directive[GrayLevel[0.5, 0.4]],

ImageSize->{Automatic, 28.4375},

LabelStyle->{FontFamily -> "Arial"},

Method->{"ScalingFunctions" -> None},  
 PlotRange->{All, All},  
 PlotRangeClipping->True,  
 PlotRangePadding->{Automatic, Automatic},  
 Ticks->{Automatic, Automatic}] \) Expression: {Bl,Li,G}  
 Parameters: {k1,k2,k3,k4,k5,k6}

]

Manipulate[Show[ListPlot[vn[[1]],PlotRange->Full,PlotLegends->{"blood","liver","gi"}],Plot[Through[model[k1,k2,k3,k4,k5,k6][t]],{t,0,1500},PlotRange->Full,PlotLegends->{"Blood","Liver","Gi"}]],{k1,0.001`0.2`},{k2,0.0001`0.1`},{k3,1.`\*^-6,0.01`},{k4,0.001`0.2`},{k5,0.0001`0.01`},{k6,0.0001,0.01}]

Manipulate[Show[ListPlot[vn[[1]], PlotRange -> Full,  
 PlotLegends -> {"blood", "liver", "gi"}],  
 Plot[Through[model[k1, k2, k3, k4, k5, k6][t]], {t, 0, 1500},  
 PlotRange -> Full, PlotLegends -> {"Blood", "Liver", "Gi"}]],  
 {{k1, 0.0044}, 0.001, 0.2}, {k2, 0.0001, 0.1},  
 {{k3, 0.0003400000000000001}, 1.\*^-6, 0.01}, {k4, 0.001, 0.2},  
 {{k5, 0.00495}, 0.0001, 0.01}, {{k6, 0.00021}, 0.0001, 0.01}]

Clear[newmodel]

newmodel[k1\_,k2\_,k3\_,k4\_,k5\_,k6\_][i\_,t\_]:=Through[model[k1,k2,k3,k4,k5,k6][t],List][[i]]/;And@@NumericQ/@{k1,k2,k3,k4,k5,k6,i,t};

```
fit2=NonlinearModelFit[vn[[2]],{newmodel[k1,k2,k3,k4,k5,k6][i,t],{k1>=0},{k2>0},{k3>=0},{k4>=0},{k5>=0},{k6>=0}},{{k1,0.0044`},{k2,0.0001`},{k3,0.00034`},{k4,0.001`},{k5,0.005`},{k6,0.0002}},{i,t}]
```

NonlinearModelFit::eit: The algorithm does not converge to the tolerance of  $4.806217383937354 \times 10^{-6}$  in 500 iterations. The best estimated solution, with feasibility residual, KKT residual, or complementary residual of  $\{1.40617 \times 10^{-10}, 0.00758287, 9.35175 \times 10^{-11}\}$ , is returned. >>

```
FittedModel[newmodel[0.0384759,4.41052*10^-12,<<22>>,<<20>>,0.0991632,1.28801*10^-12][i,t]]
```

```
{fit2["AdjustedRSquared"],fit2["AIC"]}
```

FittedModel::constr: The property values {AIC} assume an unconstrained model. The results for these properties may not be valid, particularly if the fitted parameters are near a constraint boundary. >>

```
{0.901635,891.776}
```

```
fit2["ParameterTable"]
```

FittedModel::constr: The property values {ParameterTable} assume an unconstrained model. The results for these properties may not be valid, particularly if the fitted parameters are near a constraint boundary. >>

|    | Estimate                  | Standard Error | t-Statistic              | P-Value                  |
|----|---------------------------|----------------|--------------------------|--------------------------|
| k1 | 0.0384759                 | 0.00813368     | 4.73045                  | 0.0000122277             |
| k2 | $4.41052 \times 10^{-12}$ | 0.000545323    | $8.0879 \times 10^{-91}$ |                          |
| k3 | 0.000894663               | 0.000248084    | 3.60629                  | 0.000597874              |
| k4 | 0.003826                  | 0.00169534     | 2.25678                  | 0.0273387                |
| k5 | 0.0991632                 | 0.0199486      | 4.97094                  | $5.00634 \times 10^{-6}$ |
| k6 | $1.28801 \times 10^{-12}$ | 0.000279212    | $4.61304 \times 10^{-9}$ | 1                        |

```
Show[ListPlot[vn[[1]],PlotRange->Full,PlotLegends->{"blood","liver","gi"}],Plot[{fit2[1,t],fit2[2,t],fit2[3,t]},{t,0,1501},PlotRange->Full]
```

]

\!\(\\*

GraphicsBox[{{}}, {}],

{RGBColor[0.368417, 0.506779, 0.709798], PointSize[0.016666666666666666`], AbsoluteThickness[1.6], PointBox[CompressedData["

1:e]xTTMoPSmViYGCQAGIQDQEqDp4Tj23S+pPjAOHbObAsvnPcurMGyvd0+HU2

c/e67fkQfkOgw/POns1+TllQfpjD0dN6xaHqGVB+tIO76oXdZ/jSIXyHBId7

8TOW+21KhfAPJDI4f1xe868iBSqf6vBx1p/dj9clQ+XTHUxLltrubk6Cymc5

nFaKexG9IBEqn+MgNOvkHcX1CVD5flcw7jeGE6fEQfgPChx4QrLZ7p60hfAV

ihxc5W37pf0iIfwFJQ4bi1c9f/UjHMJPqHB4pW65Wb4xBKq+xuHYvtaPWQyB

UPPqHc6XWW/cm+4L4V9odLjf8S4yvNwTwi9od7CfKRJ5ytkBws+Y40CS0RFc

7WkG4UtMdUhXDbIXaTB0+LQhIFvqxEyHNBf9I2n6ug4AS/B2yg==

"]}],

{RGBColor[0.880722, 0.611041, 0.142051], PointSize[0.016666666666666666`], AbsoluteThickness[1.6], PointBox[CompressedData["

1:e]xTTMoPSmViYGCQAGIQDQEqDo1v73RLzfb2gPDtHM5OddzqmJsN5Xs69C9w

2p+wpgjCbwh0eKI49/S+9SVQfpgDi+h8n7XRpVB+tEN6+7pfm85B+Q4JDne7

K9PrvkD5B5IcODOjr/R8gMmnOsZrSnUx3gCTT3e4/ipRriMHJp/l0Bp0dB57

FEw+x0Fqju7RqjiYfL7D9cpUjR97oPwHBQ63U1NMlR5B+QpFDt+lJ/3X+w/l

LyhxyLn/tjuUrQzCT6hw0M172zfNGaa+xoHvtljqta3FUPPqHdruhB3ZpQbl

X2h0CDre5Ke6uRDCL2h3ODi58LlsbT6EnzHBwZ/x6hM/7zwIX2KqQ+ht3w+8

z3McPm0IyJY6MdNBe0L/mZtmuQ4AV7h6Kw==

"]}],

{RGBColor[0.560181, 0.691569, 0.194885], PointSize[0.016666666666666666`], AbsoluteThickness[1.6], PointBox[CompressedData["

1:e]xTTMoPSmViYGCQAGIQDQEqDqfKFVkaD5o4QPh2Dhc7/R6ob0+E8j0dWN9E  
HvsTmAbhNwQ6bElxiWAWyoDywxwsIt7tvvE7E8qPdphVdk24aV82hO+Q4FCz  
mldb5XwehH8gyWFp94on0zcUQOVTHc4vtt3JOL0QKp/u0KG1MOH16SKofjbd  
wq6ygtfCJVD5HIe9Jq4NxvylUPI8h5innC21+mUQ/oMCh7cb9IS7bKF8hSKH  
NdOtlFmzoeoXlDjw+ghHu/GXQ/gJFQ6B5euXLJteDVVf47DvXsTqQuk6qHn1  
DuqyDIKcmxsh/AuNDvLTxFfd2QrIF7Q7tPj+YHixoBXCz5jg8FayYsmBjb0Q  
vsRUh6vnDLZuXTXR4dOGgGypEzMdyu5GT8y4PdEBAMrrdQ0=

"]}], {}, {}, {{}, {}.

{RGBColor[0.368417, 0.506779, 0.709798], AbsoluteThickness[1.6], Opacity[1.], LineBox[CompressedData["

1:e]jwUV3c8lt8blIvmQlYpZH9TMrPOc1vvsPcK2Xvv7fUSklSSkFBjslc2LUkS  
kVUklWSFhErG7/399Xyuz3PGfe77vs51HUEnfxNXaioqqjcMVFT//6r+GvsZ  
eJAKO/NV3BUXkgufnrnrWQr7iAVzyPX4vb8J8T38wRVhP7Dn9niLOKtsSHGZ  
wf3k2cQObSjvDa1kwcCMkl62A72xyyS7tvt63Cp7mUNhxc1pCfVOWo7Zk1  
UJDiZx56+GDrIZ1/9hr8XnupFRPGAmelrbQCVTPgsnXlt+JMNki4YHnOyywd  
CltYHzJ5sYNbys8rEpfSojbxSdInRN0lqPd2qdS4Xlky+n3PFxgaTuCN9FP  
gZH3rL+wVW7I6bjfqDhyAb4ruTSWvOSFlTiTx0MhScC0xaoWEsYPidfvVets  
JMBRGxeqCf3jAK1LBgHvSMD9cfjzUaYAKNHf5GhJiQeByymaZnGC8G258cxA  
WixIqMnc3+8lBHKsMw+3K6NB5sckfZv5CSiiuqGgtBIJKrdTPPzUheGeq1NP  
kV4E6O9M/jfCIwoqNOqwbhYKFpUpl1NpxeDeuKpd8XYwnLeTWVVFZFYOMia1/  
zK1B4MHY0WhlQhxiTp8qfnUpEAI7UuruvpQAraT83uyAAIjyleG0qJeE1k8l  
+jH9fpDI/zGUofA/eNMdJAwwfeBGrIxSQJgUsOZO505YeEKB1Me8E06nAN2e

fjvd4Q4IH1O2R/VPw/a+A47lyA3GcbynXxyVhrvf7m3cGXOByYLI TwWZ0qBe  
tW9ZKcUZpjefX404cAYEth/RHNBzgm8GueomcWdArdrarIHYEZZ3Ne/ReclA  
8wTRnMxrD2sWvGafPsnA4mOt7EpZW/hdtUzbYi4LC8GPouN8bGCbvutR5mtZ  
KPxQ6bn31Aqozue6+ajLwcMLyrGuMpZA2+THjWuSAz3XkTs7bebAcFCr57iU  
PGge7dl4bWcG71+Xjd7xKMARM7bfF6eNgYu760NFhgLwOT8f33tsBEf8cy8l  
0yqCDFujjdHZEARE+qk6RCmCWveZrQoPfRA+rvVdaVURyI+0lqgydEE8nLeA  
w+0svP9yREp9kAhSA8sGPybOgnxOYmiGNAEU4nNril4qwc/H3lsGqtqgPObn  
GKWmDGkiNjyXv2kCdlqL3axeGRhEI8s8izVAK4X3uZSECpzOV7qUFK4OhE/L  
wfsLVWCj+czsTTsAPcUu4c+cqiC9rZTzrQyB8ZXckdY0VZDHWyTOtqmCdaal  
6BemBuOGM6I3lJtGVIpkwZlNNbD97jflkqAI1ANsdBuhCC6mE31kv8vDKNdv  
7+YNBDpM2xpbHnJQbv9xKDoUA6r3Vr1vaGWBVPJcCdvAoLTmdd588xmQ/G1m  
IKAMoCPcslOcKA27SKVJqxXgwQmn8ZHkzDnVOUlugWQNTU3c65FEoaSBY8d  
UFaHb3VzVtTfxaG9LGtwPIldCr9j3/zlxOBB//4Lr1vUlch/xJpUKAKZa1Fn  
K/+qA9/bqs9iosIQw7W8mKGkAbL6bZWXuoXAYH7YxKRFA157G7nd0BcAZTKe  
Xu6vBlzT9tgQczoGwiWtLYeVNKHjCdPXNcOjwNor5fs7QhPcpX0EPznywd8f  
RQLvmzVBuFqgK/oGD8wc4hxu/aMJM2qS1JfzXNAvn5KSf1YLVu/k5DyyOgx3  
Y32XzzdrQfcPDX60i+yQfmf6jvofLeBpmSYVaB+CsBem5ifOaoPxot9+eR42  
cjyvPkAXoQ33Llfq1u2ygC6LcvtskzZ8S8/nVf/FBApnKv17fmtDwNpCAJmJ  
EQTMBU6UKeJAYIru9J7WAVjPp0/zbcKB373RJ0PsdDD1JFLN8DcOTtrLBHPe  
o4GemaVvaUU8bI1rPXTRo4a6Aw7F7OF4aPM3duVg2Qe3T76zXG/Ew6jDHXWG  
l3tYqhGOaXQTDwbPuW/G5+9gQSEtnU0KBNh3d5/H05v/MFx7oUh0IwGM2u+n  
p2/8xqSn2d/bbhJAjLv6TYDpJsZHm5yOFIjg1D33ZPTNokYr/hcTCCPCvo+m  
La+cfmEruj6/9jUSgeuFn0sc2xr2wf9TydcNIjyxzheHkVWVs67qJzQt5HWil

OmBBc34Fy5k4+zT1kQ7oalzZ8VVbxMh75SFeGzrwpKCZk81pHvM5cVxcT14X  
rh2QLud/8B2zwGdOSIXqgoaX6R1rxllM3ZvuysFHumA1nOHbdnEG03klQuPn  
ui4I9x6jMT3xFeOqX9wYktMD0lbsFZuRz9jC1qBtdoMe+PiOBun9mcKGj2mz  
RazrQYlhtd/kxCTWqdH83FpOH/4+1uFRm/mAlbr9F64Sog8eX7MX/rC+xzLT  
CiT5G/QhdVQgssJ6DIupOjS1+0sfPso2Mco8G8HchpKuTcsawLOFvnQ43DCm  
wuf95169AcyxvA/4mzeIdX0JXSWuGMBEK1nEP/otpldOmluRNASOzaS9+Ml+  
bCT40vQNN00YvXWVKnKmD7NXzR5XuWsIEX2TX7OZX2Pfae+8/fzREC4d3zUb  
MXmFNc+aazznNoKQHaYHqo9eYurVDpOeBCOQXTj9+tLLiyZw21c1c0I7if+  
8JMMeY71hnsPH0wyAh62Ka0QhWcY62TA2y93jOCN0o/aXeanmAmE9T2i3HtO  
1wNVD/x4jGUXR/ekfjSC7NzR3ntf07CJAwd5/4ZwQ0CTWTEvzbMzfBS+z5F  
Y/gcYn6nMLkZK5W/1jxsZgynA888ZN5sxH7kZjc8CDKGhDWbVab4R5jM7q2a  
qKvGID7vZPPveAMW5nSnQr/KGGo8nsoTx+qw1u6SUoE+Y3h5vq3o+r1abFey  
ovjXvDHc1L5/LiGxBkv51ZifK2IC+1xqeHPXKrA+y/YcH00TGGTfbB7hLcfY  
2p9mYY4m0HUhI0f2/EPMTODIVfZ4E+iXnToy+uQBlpPUI/4t3wSmC8Pov6uW  
YJNzg6nNrSZgaFNsUTdYjAnqjyVdGjeBfHkf3prYe1jZ4S8xZzhNoTTvzYDZ  
4TvYcuT3CFoZU/Atyv9Uvl2IyU4thYwZmoJB0R9q9bXbWITGWkCZryko0Sjq  
iDLkY+0lv31iL5lCrVjFYyKWh1Ex7XgYPTSFX4Vaj29n5mBa/tSuJ16awupY  
5SPcvpvYG0UWu1fUZhA1tvdLSCILY89nt84XMAMTU9rd+OImzIKKx9wfmcFn  
+6PeChXXsDwXfmMNWzOYfu4oc+PSVWYqR0j/cjQZtD0XvdKwlYEJSYkT526a  
ga9K160uqsuY+zUp7bZHZpBZMCDGI3YJW7U+q+b40wwu12ojhvWlYHKdakpy  
B80p8ZVKvsInY5FCmvL7pcwBFTH+92UiCetMJpz5oGMO44Vi9UopiRj1or5U  
pYc52PpM5+kSyBj00FSCIgwOvr6TDLX8CVhavZWlabE5GHb4CEjQkzCOGGf+  
v5/MwV6mKGyaKwazmvbg7dsxB6rZpx8E9aKwfc2/w4VHLKDnuDv2oCACmy4N



PhSkZAHTCrJTaczhmDBLJlu2pQXkGVhp8GeFYh6BcQw8oRbgOPbft3rZEKxy  
JJFuMdmC+hc2Tz6eD8IUCjJ2rvZbwL/BxaGa6wFY+d01uf5FC3gp314ryemP  
CTyw8GFisIT/DjzrUBHyxbLLW+8RRC3BYXD6aqShN8ZUc2zigqYlPKw0Sp70  
9cRIDWT25w6WwNXrwlS7545tNs8SqeIs4fau6yPFeDds+mlVc1SzJQSMkeIm  
u5wx82721aYRS3jxKGpTKNUJ6+0NE9tYswSN8BMYOu+IwcAHexk2K2BU2lz5  
SnDAHr1D2f5SVuCuZVu/mmKPSY7ffVohYwUDXuOWbwtssaJjeroFdyuQ8Pfw  
1hy2wdK+9Qe73LWCLldjZQHXLbG9eZny04+toHCoDzp4LbCQ5ewvU5NWcD3R  
Sr6oyQxbWNviPbplBUXX9I5Xe5ti53/bG1tzW8MIYS7zspwJNvzvWWq2nDU8  
qJj2nmYzxnSoxJ68M7aG3p2CtldQ0yOYeWUQbo1JBd8fNPOr4c9ZDF1u/TQ  
GkJPiBmhczrYMfam2z3d1tDou/J8rYGAZXEEdGaGbsYYwmlMighJ4jOFIPLPm  
PhvY23nHdahRG4s7/IWTdMwGyu26NqRstLD1E/joDhUb+FSd4cHDqYlNnTy4  
oBhmA+ouSb8WnwNmeiZYMPS6DdwxFOY6YdhPffjVnU1NqAdzfFo00wNQ8oq  
V1feUOYHP0b4U6CC1aPClycXbcBtt3rBb0YJE9ek2fM8cA42YUrpivZZrADv  
rvBA5BxUPQb9+icKFH08fV/QgYK5/kVH7cpi02bXJ+1jzwF7FA861imDBVn/  
5sjPOwfCtB6+76+dwebszum+bzoHnPlvTrtESGN2To/JXCPnwOPnqT6qz6ew  
IbcTraZr52CJofAYrj3ECN4pP68etIXS/T7kFKH/MJkQQwcmHVugP+M8ShwX  
wx5E1N8kuNtCRXxcGWYjih2N5R64kGQLZ8eYvv23LoxIjkTTP79jCwOeSzOk  
4hPY/uRPalSPbeEQ/u2dV55CWEyaZqjapC2ciOLO79EQxNYyHIRE/bWFyqLz  
9winBLDJm/5HNmTtYOMC3yOWgKOYcf47ExljOwjYnq1xLeXDuosU0/z97CDp  
jkPGuR0eTPX+racVl+ygbzTH4KgvN1b7c0/PfKkdGHCoKI1vHMZEeq5ylxbrt  
wKfRI3f3BieWX/fS3eWrHXT7cH+T0+PAktuujE7x28N9TI7Rd4MNW/kXHp2t  
Zg8TT+wSOAoPYlaqDgIGdvaQ1RdryRTNgj2NIbygi7WH7NKhCKUYJkyyQ9qr  
I98etOdPDHIWMWDXd3gOhrbbQ9t/MROHZ/Zj22r7Gk502kMqY0oMHY4eG+gc

3Ll15DzEYXJi2rY02Nm9lrUmKucB34nJfGamxu5id/FM587DkcWnN7iGqTAm  
UtrSs6jzcI1V5N+Kwx4KeRJ0LSrvPGQSXKJN1HfQR6pzCjKt54FIO5J8C/cP  
4dQ1J+bfnwfwgAhvLr+/iPnzxcwKZgco9nQob+XbRLBv1yX1qAM8KXny/Put  
dRQqGKTOctIBJm+MT08o/EJl6rMMoOoAnXcPFh5Z+ImmHG0mj+g5gHeq1aen  
9auI9xf9fucA3C8bwqmFlBhLsaCe+8HYBvesB3mOEHqv0iKXrpkgMcbmjK  
YUfzaJa68I/bLQclYopwy0/9jvhOcLzWKHeAzTTcxtDqN2SomXL7WJsDLBW1  
CQ+GzKAK53/+W700sNjmP1zL/hU1J/prjH5wAHe173SxPZ/Rj3tfOesWHCCn  
W0H3QtY0sph53eLJ6AgxmQGpi+8mURotpGvzOYIM3b8it88f0GPhBntBSUel  
0x8ZzWR7j9a1xM/sKDmCdvvv0v3nx5C4az7Ne6IjpLYVmnzqHUF2F9hGG6wd  
QXxp1FfeZBhl3k8qverpCEYrJVkiv4bQv28++oSLjnbGd7dpEPUWSdN/Pi6c  
S1k/qjqdv60fuYiar+2V0kJH/n9Xz5X2oVzCq66JZkewnDyo2N7Si/rd1G42  
9TjCj/yLz84t9SDqlFrP6+OUeMZl1m6rvUSKD0RU/eccwfeh8PcP5S9Q0XeW  
z6IHnIDXkTq5efwZGt5PrqfmcQLbwLgv7FlPEYP45oUpMSf4FDZb+8r1CUIE  
L6tWRSf4eNHb8uLNThTkMSWZjXeCz6+zTgZfbEcPUk12Ai2dYDHzYhRfYSua  
L00e0Hd3goTOtHHCaDPSnq8KoUtxgt9PHgk6Fj1CUQwn8J+znWBnxVE081QD  
qpK4ydtR4gQ5QvXmtiN16CuRaSmn0QmevKF9bX29FvF4xXeGdDvBUBfVQ2H3  
GqSX9uuq0agTmDbeEa4qqEIjZe70J2edYPClminXjQq0sGB4YIbOGbLtaKP5  
50oRbn1+sYbTgbZk125ZnXuA7u4kDsSecIY+J4zh1vf7ajf+WL20jDN8DtcV  
vHSpGJ1ja87mVneGHaowjQHte6iZ1yRqxtAZWNKpvWY5fBdxnliq7V3hufU  
NhZVv4tQn7yAiG6MM8zxP6rM/HibiW0tB3guOU008z/dEeZ8lEQwW5rJdQaV  
Yg4GbvM8NG28PFbb6gwf4s/6JrbkILVzqfVxTc6wfKOYcnf2JspzEbqp2+0M  
kYvZ9y8P3ECbvU1RPCPOcPXGOceR2CxURVpVr1tzhpjmHeYt3kzEmJYmEr/P  
BfhV3uUJ0l1DbteFGfTYXMct9Z/j1L6r6Fl+5xLPcRcIDZt1KufPQMdLrN5+

k3KBhSTvGmvzdBRTvVZfp+oCLmSDZ8mlaWi8Of1mvK4LtHuvVlhZx0RXXz+x  
5/V0AXtqXm1L9WS0NGyjMRvuAsFFg4cf/ElChKl1kfpkF5h98rxcuysRFX/P  
YCDdcIFjtk52nfJaN9P8R96xS7g7dXs23I1AdlvPXvLW08ZP0i32nKZhFpp  
7Bpmn7rA5l9H92nZeBTEdS2a9MkFAsQWRb4+iUb9x/87r7/sAv01Xh1pZ6KQ  
pMQLDb4dF9imymutaItAyTLnRb8zuQLmV/jG2C4cfVX5y9DA5wrSpndKyJxh  
CLsv/yBJuEIsQ/cG/lMIyjeQGtQ/6wpzp9Y2E9uDkZmjY853c1cwMrkYMIld  
iGq8/kU3uLiCVa7H7fLnAYg55Mb5hGBX80i0UGzv90cesac1DciuUPO2eD1M  
1g+9SH4leuQaZfxae6pwvQ8SuurMOFfoCm4VRQxOut4oLnfnR00VK2Q/25BY  
++uJFCrOPDLoc4WUsM3YR7nuKPPR65wjE65QtjV+3TfVDS13usbMzbuCH/16  
U/pFV6TTs3f+0R9XuL8QQxV6ywU9GMzVJ093g5XfEeTUdmdEOyErZsjlBofi  
lUwlFp2Qw8wbxqMibjDw9mBqi4gT4vm9b+iRhhs4kNV0pnU6oBCq/EdkYze4  
ZhkS1nzUAb1lUMg1dHCD9cDEAXGm8+gkx9uYo/5uAAXH5SJW7dDFo14087Fu  
sjt0zeDwd1s0K0Kr1ZjuBgbhlSb9y+eQxukCscRbbqDTjQ/Rpz2HttSHlo+2  
uEH6Xs9ukqU1Mvl8xSD2yg2EXIrUSclWqORq2okz793AgtOA+3KXJdpumlVT  
mXeDN+LbxSQ2S2T6ScNK+68bCLQOH5T2tEBI9IVBhgzuQPv5X2zAG3NEdepf  
ujWvO/A2Vh7iVjVHFTH1T32V3EFYeT3QW8EMURcfnAwnuoOiYXv74FNTZPXa  
ezPB2h006NDNvDA3RVVrL9nSPSnzZVkc03+aIDo+4f+yI93h0zv7D88sE2Sr  
TtIuuugOWz+NP99VM0F1HpPny3LdYXyccSx6yRjZN2Vldba4Q3Pt6yQXG2PU  
MLVa1fPKHWgOS68p8hojRnr9V0Pv3aGcm4P+0aQRcpB6+HVy3h06TnM3eBUb  
oSyzut3Zv+6AvZta+e5vhFhjHhI+MngAFsFc2YaMkMu9Dpl/vB6w+VqWNpTN  
CLGthbofVPaAZ66ybE2RhsiNdyiBV8cDxpn0ej+eMkTtcCr/hI0HMEcr1dG8  
AWL3SGuU8vKA6dmOB86lBsjzyuxbxSgPGEpVkX7vbYCeNGosqqd5gEe2GYuk  
rAHimiqg08vzgp1VH1Rnd/TRs5OWygg6tHkB6viL557Y+4jGrN/Pq9YDGvsir

NMH6yC/6oH/IBw9QjFrDserqo6673hfjFjxgd/+b66Mi+uhI78t7qVseQFsX  
085Ho4+Cfp7ozGT0BHxDCH3uFz3Uw0Maz+fzhB83Ht3n7tJDle5nWWqVPUFS  
Wy7k9GU91JuRjdam4wmlP25mpIToIYHGVfUXNp7wNK09J9IOD4V91LMd8PKE  
6PLpChqCHnpD+zDsfZQnjE9pfBuR1UPCJ+mufU3zhE/1grbDAnooytSx/Eee  
J3TPXdk3w6qHRO/yTu9r84SwSc7FsGVdFPMqdlvptScUtLZoD3zSRUOrg5xc  
E55gMe5uzTaki+KxNKLkP09I71Fgmm/WRaNus85yTF7AwUXz3qBSF53M0IhD  
R7xALff0Y6W7umh8cqVORMULrot2q+lc1kWnaC3f2Op6QV7N6P5riboo6b/6  
727nvOD7mJmZU5QuOhPlfTQ62guyMruszSJ66KPXOS4ULlyjrB7zNaXPURVM9  
J4yv3PIC7vgQzM5GF6VxT1641+YFKy+asmr0dNHfj08dTq+9YPQmbYQvThd5  
0P/aEJzwAobulm0/0EXaGwxuRVte8Gs588M5eV3U4HO44DyjN3AcNSCDtC4S  
mhEYPcbnDfc2bNg8/9NFV08UcbeVvIGW/FQgVEgX+elotkSvWHw2EtNo206  
6ONTg8Yj1t5ArRqWYc+ni1prXEXzIrrzhQmY4Oy2HLpIQD7S3TvUGuS9Pv2Ud  
1EU5hTHZPDne8J5HclSHWRReFZlynv9nkDZ8ij/7hotdFM3SFyOKlN9Q8TysQ  
odFFjrFIYYfHvMFM9pOuDpUukvZ5Ont90xvWnlHf797SQQvEle6r8j4gnFuG  
Ma7qIOunW7uG2j4UPg8I4n/ooJ6z9IoHzX2gaOrpu+AFHXRfjP/B5RAfSPyj  
zXtlRgc500mmpNX7QBkfo7fmA7qj7F4THzuA0snUG/vOx2ktu74+8A7HxA7  
F7X7b0AH8X2NcE9Z8wGlz30b/S910EWbpElctS8IhO/89Hyug/4MXhmjY/eF  
fz25nH2dOmjkSQk+6Ywv1J7SwcYbdJDW2bp4TXVfyL8YQYqu1kF11R1N1Ma+  
cPsU3mb8oQ66WjAslhDgC1Tf/hJrb+ug3cPT54HkC8Fqf3JEb+og38uLN/eu  
+AK/3+s1/FUdpBNDfSCu2hfkZ4WVEhJ0UMsvFlB77AuPQl7YZ0bqIHfV3ojt  
fl9I9/TfpxGog+hspOeiln3BmZNT2v+8DgoZVBFQ3qWsf0hi45u5DvpCwFv9  
ZfGDbeqYhz90ddATRfuecCk/yDVmM7mroINOVxtSKar5weMN73jCfzrotmjo  
2U09P4g7qswadFwHRR10Lw3x8YPFekDn6vQ6SP5XS2pgr/4JH2qDn5DRH2m

i40CrX5QtDRmNd5JRE4NR48M9fjBzb8f5+9XE1FGaHylzKwfHMhr/uJ9hYiE  
R2s2v6z7wZ2/n6xt44ioTeELdp3GH5SyW8fu+xDR3G+toV8C/lBy7DS9HJ6I  
4qzCjhSf9oe80SPdAbJExNnywMUM+UOfs2P55jEiUo9i/N1wzh9OZOft9v8i  
oLztgSNh2f5gk2TTo5JFQNJ2+1xF7/vD/MEbF02iCKi7Q6ZqtN4fztwJrsw8  
T0C/4m6A4qA/iPk+U4kXI6ASUqXMNI0AuA1LEfMq80inNM7SjCUAfjoObqZf  
wiPVz1PRFZwBUPJ2WuOijx69U2d7YXsiAFbVNj9kCOERFU2wZQcEwF2p0An7  
VBzSrWeKOUwIlgK1FS/vT53Eo27m4yNcwAKgPhXbOy+HQya6ReX77ADgvRivP  
/FEbWV84GxMXHQCbVduDOce1UbH8YNEoOQBi+5QOE39oodVvni9OpQWAWMJ2  
0PMWLZSMu8X6KScAiTmfHpDLVS3f7clawyA6EMMnNUemminKfvFzY4AGK1b  
it+V1EQEj9MLK10BcFvWquzyogb61OMgW/QuADL8Gc8ouGsg5rTnL6h+BoAm  
16Onqnh1ZKlsu2D1JwC4/9R85NoCdHdhnbV2LwBKf7YVd5cBOqsrauXIGghi  
PRqSQXSAXJkvLjz9LxAMrny4zaSmhqpek8uaZQOBEGaw1uOjjibTYryqVQJh  
KeT9jaBsFZTMELCQrxsllb3qaTRjSqiE3nlh3DsQcsyaPDwZFNDyC6Myv2DK  
/xAsbJRWHilc0PFyjQ6E2YE/JoJ/ZdFLGrRgcikQnInMyq9en0FzVCILUuWB  
EHbpxK7df5JI+smxMuH6QHgWtpteXSqGIuJ5vI60BULk8YDWwsMi6MAu08KB  
14Hgmuv8JS/qODLqoCvbGwqE3Rf8oftXeFFOzJ7n5odASG9Q0s4CTiTxb23+  
60Iga0w7m7xKtQ8FtS49/LBG0c+1WUa75u9qrZGznoNbgTBtkGLHWTHRQa00  
LdFDHQR9Jw9dnfy53qHz5/18J2MQNOflk0WNbndkNr17+Ig9CNZ/0EIRK+50  
fAh741nBFwRL1IYfb9SudwgpvJS4JxQET6bzuFO1Ozu8Np7M50oGgYZyhMD1  
zG21uobWh1dlgiCk6vOhBzuH0FZwg2eKchAwV875tRw/jjRkqyTiNIKgh2s1  
ePRaFF1aezAfohMEjEYjHCXBp9Bw7Z2H3iZBICi49C1aWBYdDbzl6WQTB1z  
C7cj6RWRi/QNCWunIMDsArICniiipWMeUOvIOicpDtJJ4vQelXqQ1xQEOQ6  
5X31LQSk6k2VIsKgifdw5fsvqijKkYCTlyEARGO+6xrmigvqXQecm0IHiq

4KAdMaaJOCv8HwpmBoF+ydm5zTwtZOvt6cmTFwQPwk2C5s5S+l/SWeLg3SBw  
sjrsV1ajjX7M287TIQXB4c0517x9OKT00Lhdm0Qa07KzRz+D4fiPIw8f7UE  
Qdwxx+CokzjULaYjsfA0CM7TjtwWocMh1u+a89OvguBK5ZWaiRZtZFGi9nBs  
MAhcrbtpBKy0UYGromf/+yAwQXbjPgtaaFb4jMSLz0FwcmHwrVy0Fjo1Izmf  
Nh8ErxbuXFng1EJh94Qf1v0Mgt03Ok1UzzRRp9Mxz4d/g6BIUGdhPI0T0Qvx  
SBTtC4YLwfyveUiayPDzoflshmbIM9bY3ruviXKKmB5ePhQMX77+Oxy1rYmm  
z9N5JvEGw0VpkUCylxYSP74nHi0YDD6vnNmjKPEETP2ZC5QIhk+XBHeyw7WR  
XuaFM5+lgwH389/kjJUOiePYo4zOBoPyxH+PWq7hE01WwbPHWDAcZOhm3DqO  
R9OV/zGdxgcDI/Inp6GHeNTu2GxaYBAM96TSNez+I6Ccw9r5LBbBcEPFdo37  
DgGFvBqcibELBkNHZc52ViIyirWXWnIJhmHWC06IYCI6eWYx9JxPMBy6feVB  
IkUPDnwL7+wNDoZfLv/87Xl00Ew07X7l6GDweix/1MqYoj961wwfkoPBia7F  
Ui9UB+VTHcvhSQuG3it7b7goehfRUDadci0YrjQlSl6n6JuZh6LE75xgwCs+  
JF7Q10HSR7sC3YqCwWpu9ZXDCR3E/NaodeRBMNhkaJalbVD0I/EjtXZ1MDyq  
IDHW6yaiLkUv3YbGYBjqNRRZuUlERYub1090BgOv18nL7RS9iSlMnMx8EQzr  
B21WdnBEZGXXJkL9Jhj6wKtuW5yI5Pbf9g0cDobI658XezmIiK1NonF6Ihj0  
2bdyM6mJaMmvcdfwazCA5+XZwXUC6hHSxD9eCAYaddnJTwsEVDw6cOXUWjDo  
aiRe4PhGQKQ02/HbfynrHz784/IXArJF8wIs+0JAyYXET/hOQGfXQj1jDoSA  
9qit408VAulsoa5bPBgCob8u/uHeJaBV6ytbNtwhUOMbf2iFUo8+lqOavcdC  
4JWptbe9ABGVpi29pCQaAlPnfqfVniGipFD54VKpEGBVvdqQ1SAiB4lnR3nk  
QyCybPfuGWMiUv1o4JqiGgLiTqxj3Y6IeK5NVG5qhkAM43XhXnciWtfy2HTV  
DQFTD8GFbV8ievtHY2YhID4lNiNIQAiqqhISNGyCQEcYdU1K4iIUh1Y39Y7  
hkDmR1suRkp/uHDe4jnhGQINx5qjz1P+Q4+YY2ZACFim63nfo8w/GtPwcf9E  
CAg+cGmdoaz/57T6Wk8CHSs6CAZLyIa/vpGeTo5BIZmiX15rkRUc9Mm0TAj

BArIIV+UHYgoXff7684bIYCNzIrm2hCRx14w56nblbAz00H6Z0ZEWvVUdreL  
Q4CrpsU805CIBNwv32euCIEeuTymDB0i2ubjW46uDwHDwOMHjlpqP95forDY  
GgKLzgy1oZR8NZBl422ehcB7Rh6fZxgRXVV48vLVK0q+TBgPyiMi8lnQY1Ma  
DIFjMN/kqEZEhIL3VqXjleCLQk8Mq1L8jonbHe5pSv54fkbGUzAV/a/5508h  
8Dun8KsFBTf7Mke7boYAE1vhtf9j/xERZi26UNjYueTvQ8Fwebl1jCMU8q+t  
+eIpmE27ydNbKBSGyh4HP1Kh5KvoiPojiVCoPjlafJKCp7fjefakQ8HgLTl1  
USaiHquZFcLZULC9+KnVW4mSvwbCy0wsFC7tLzAVPEtEOWyVBZO4UGAhad1I  
UiAiks+hMFGDUNiXtvCuWY6IjIU/CLfahsIXP10TeWkiWrvuTf4cGQpbYeWW  
fyj8+LAyYP1fQigMuty5dUCMij7pyp0JTQ0FdU/ZITERIrpOs/PpwM1QMG05  
TZ8gSOHbecmk4JQOEPmWm45TumPthcZ+fdDgYg3jNvhp/AtOENNuiEURBj2  
lsr5KP0xsMYZ1RYKnoxXlvh4iYj2P8ul589CYXa9nPYWNxGNfDI+y3IwFMSC  
VOXfcBJRmEntn7jIUHBkUG8xPEhE9IWH3/ZshML5z80f51mICMcY9YB9JxTY  
6y1HYpmJiPuZhkJUxikHs+iSmeg1OPMcP0b8TBQXOVUcKUhor9sv/200odB  
cUbIVd1NAvricw7n5hUGVD1yGlkUvfv2POavCQyDn0n3jMbXKP6TINqnSQqD  
obd74iYU/iqv8kp63w6DgHsf9BnnCChmQPvby1gYzPYa5UaME5CjMrXV3U9h  
4P/5fjE2SkC4+y97076HAfPnq5f33hHQoWiTmn0/w+BCWXYs5wDFn4p6RO9w  
hUPYgODHLY8IaCD2+iF1i3D4y19iYlpLQA1zVkkS9uFw7NCz0ttVIHhMj/0+  
5BYOef/ih6fLCchF4uHkl9BwaMxPuGVcQkB/hjsfJN0IhxSbf76TeQQkdHJB  
rWc4HIKOPre8Tiag/Tera2omw0Extm3XI56AlvaFnsidCYevviPyijEE1DS2  
d8BrPRw4v7FodoQSkf7i4WEmzgiYCF097+9BQGEfwMvQNALYw9pOeeoR0KvU  
m9mjgxHwZjvTpZ6NgDTmVq4pvo+A5uejXQIsBNSOJ1zOmY4A7swZj3QGAqqi  
/5tosxIBQqZMNOepCSgzySZwijks/r4k8W78wiMbEr/eLD4SrC6W108bo/jx  
T6F4vGEkKGYeVnR+h0d6WL9GqUUKGPJrDL8cwCO0G6fk5RoJ5Ttibfk9eCQU

My26TI6ERL6U3thWPFoIv7dvsyMSTjlkeTkW4pHz2L9tixeRoBU4/udYPh5N  
Kpj9aeqLBPF48e8zOXjUv0G7EjkRCdcNt45eysSjumC3yZ0/keC42RVDTMaj  
/951jtlTRcF5wVd5Jol4VCzD/e7x/ijlfrGe5kbCo+yfL18lcEXBZ8W3fDVR  
eBTIL9FEJxcFtr9/pwz549Gv/oQ6N5UoSD+e063si0c+pz5UvtSIAju1aGKN  
Fx7Z/0grvmgcBdxOAlNdrng0pve1cMEqCl4JNLq6OeORUYXKLV0Hyv4zzt08  
jnik4b10jcU/ChqonqnW2+JRW6/WZb+wKKjON/yeb4NHcpK3Uwdio+BAV3VW  
nhUeic7rx19LjwJdlbuCI2Z4VEgoiVq7HgWB/YeyOUzxiKd0N9T0VhT4BbMq  
ehrjEaN7tc/hsihwiPQUtzPAI9KIB83huig4LHO2cloPjzY1hfi4W6NgUOLA  
2URdynnqJqQ5n1HOF1XRq62DR18Ebrzk6IOChP64SRDxyOqKgT3HUBRMZnSy  
niZQ8r2zf4P9QxTYJw89t8TjkZbP00vsX6KgDe1PLcbhUeuHKCH2hShYGDxt  
x0XBJU0/DA9tRUHuaqm6rzYeZWY5xLlxRsOJutF4Fwo+QMPHycYeDTNsgI8K  
KDgu8F3ZQb5ogFljUVrK/PVP6eoHhaJBWk/1/g0K9jLAjbNKRND23pNM8r+  
0+17fqwy0XD3TBqNOiU+i/9a6FiVoyl8uD5rS4m/Lzcon0UjGtav3lsupZxP  
48BJWRadaFA2TOcXpeSjOezbK2aTajhUEgwd0cejU98KHJhtomHIS/53kyGl  
X0ytfjM5RQPH9q37/ZT88j07lMHkFQ3Z+8XJfJR6XJV+LcwUFA3GDyoy8i3w  
iL4wqY0xKhpUNrb7zK3xKlaFolTkaNBnWkJ4Sr3Xon/PMaRFQzSN/mzgeTzy  
WKijZ8iMhse/17pGnfBoysqLiyEvGlioayfD3PCoV/6j5oGyaCh78rTTxw+P  
oDj7w/66aPhW2preFYRHjexGgftbo+HAQZ5b58Lx607KswL63miYbtcj6SZQ  
+sM+Rp5+KBoSz/balFD4kNEn30f3IRoWcv/EaKVT+v1h6V/ahWj4GNpQaEDh  
0yq301XatWiwEp67116AR27JR8Rot6lhSID3d+B9PDJxzcjYYwBB8/H1xrr  
8UiSP6R6n2QMiB+We/2cwveiS1K4fTlxcHe/Z1TqJB5xbc10UinHQBC3XEr+  
NzyiHrNmpNKJgY3N8SeNf/AoQpvjzp5xDNzYsvrZSblfluv7FPesY4C6rSdU  
g3IffbiKue56Uv5b187NCROQ0d6ffzuBMZAvoNsuIUNA3b51mTuRMXD9c71q



ABCQ6qS3xE5CDHAFDZl6ZUhAdToiT7YvxkCbISeXlgMBibdMWWxfiwHe7aNW  
S4EEVCCW8+Nfbgz0FHHxvk0ioEu0TEf+PYyBqMHd+XjK/c16JB9GamPgh8B/  
7n+6COjqGSm36pYYiHx7L3t4koCy7A1rnV/FwJUK8p8FNLiCp0eVRuMgcD9  
P4qQFEXfLwVuc7+PAf7jFd/FdYkov/k6vm8uBul/S6uuXyKiYwPCviWrMXCp  
devxchXFH397lEn6EwMHKwX7694R0X328Y9yB2JBWuVKaK+QDhKX8KQ5yBYL  
onQfkhQpfrwM2xKf544FZe00xjuROqjK52jIbbFYSEw64Zo/TvHriZW54adj  
gbWOrQbPpIvqctFjY8VY8K7zthMCXdTU7cBlj48Fy9Tg1zk1ukj548/T0wax  
oJouTG2wpIvaf5HNWy1ilf+xboqrpB56lnC/yM8tFjI00XkuV+ohDUWFboJf  
LETY31KJ/KWHuvRfLgqFxcI1xRpCroo+ehU1rzB2IRYYF+12X7/TR0PDUm+w  
+7FQ9olGz0HEEJktdq7xVsbCMNcrt78kQzS6z4hmvSEWUq/zZ13+ZlgmTgU5  
l3bFgrgdYvhhYoRmUhv/ss3EwqqQGIPcSWPkVog/vrgYC1y8M3yFbsZo7tG4  
1otfsVDN+vNO611j90PL1pVImjjIF927cFTABG2qYqJfhOKgQJ9hWk3aFEWY  
vtVtl4yDrkTn0akiU7Tl6RiYLRMHZfxcP5yfm6K97MR2HY04clINDT9tb4bl  
lZxfhHXioMhTRzipygzRdt3fv2ccBzrTHqUjVObowM+XjvWocTBx5bYUqcwc  
pe23jrjsGQeHntm1J++YI+ZjC7fdA+NAYrzMekzPAmXIRT9Xj4yDVL2Nacmb  
FuiQLvP8kYQ4uJvBKaU8YYGyHG+zbqbGQYeS1pFObkvEFXFK7u3VONB/IHhB  
X9cS5WQ8ti7LiYMW237c/lBLxHffKD6pKA7chu+qoOuWSLomRGrSQRx8zsM/  
Yyy2RLi2nAmJ6jh4wX53/XWpJbLtbr8Y0xgHotfjwyKKLFHQ4LTiQEcc8ARX  
LtKnWaLUSdpZwRdxUM3w97eviyUq+C6eFdIXB1RVp7HiU5aoYU1P4+W700Bv  
OuZa9N0C9e4ErPJ0xMGRmOss1hkWaPrAjQKfL3HgYbliqHXCAm1ytOg9no+D  
kwzpo1oV5khIct9Dlz9xMO3wNXW90AydlRexbNqLg+Eyd68QZjNkAEQ6xv3x  
ICtsNa8ValqiLK45Vh+OB+XfbCmRYiboquOjg9T88TD39+7FqihjVOLzvsNM  
OB4Y4+R+jrwyQkNkQb4tmXglahnyVXlsgCSra4e0jOKB2UXzxD9air9vHSHd

tIwHnR1fj5fbFP148ffUgn085H+euaikikPkCfVLV3zjoV/k53nha5ooZ9ZV  
6UtIPFjxrduo62qgqp8Xv8vFxAPpumfyKlc66tquvJGSGA9OHSX94xMYmtg/  
pPkhLR5cMt3ouFvU0Br75s+TmfEgrc7VFvFCBR04xlcUnxsP711a/rLuV0bH  
JJDBUFE8rN40fb2QeBbJyTltC5fGAz50TolfQxHpYMll4dXx0HgZ2rAJr4Ac  
dMqsehvjgTOPjas3Tx6Fmfft83fGgyJ3+U03dXmU7rDW4P8iHtYfGkzdpUC7  
3lzOz/riQejH7i/SHXmK/ikfOjwcDznRj78IuCug/gT7x+4T8XBy9XpDRo4i  
mkkn+7Z+iYeGi22xNSpKaOtmyRGWhXjoufR1QuSsCmK71/vq/M94sOWVKzkX  
ooZEq5bD6/5Q4vHue6gwj6ECW4br1FQkeDv57f0bvDqScDqyUE5DguGC0h7F  
Gg3U4C6lbr6fBAvcnSm6klqoN8h45QErCUqKjh9SpvgB8whnnDE7Cdbn0kr/  
ThHQdGzo7a3DJCi3Tik7GaODNINzdfX5SXBPCi1sU4fJWSU390UIMGVlvgz  
a1qGiDmr42+hMAluBVf5y7sZoZu5A0ZEcrJE3NeLeSVkjiQKPz9Y+48EqfAl  
0G/UGFUW/9q9dZoEG+xNiXbxJuhsGZ2FtiwJFt/l8xw/aoqeV3NXLiuQwLPV  
/6R0tSkyeCRBm6NMgrsctJXSZ82QlcZS6VVEgqxHf5+7PTZDjgNV+hc1SKAg  
Etl0ScEcedkGriXgSHAmiZXkc8schczL3ozSIYHAuibX6KI5igvbVAk2IIFX  
dnnQDRELlELTMu1tQoJr6a8vh+Ms0NWroRdcLEhw8s8ZByLl/sjR5J2NiRo  
3fL6MiZngYrLqAbM7UnQ9oiaZZVy31QqPg82cCLBG50L4/b3zVFj1wUevBsJ  
Aibi1H6Km6MnxoQOzIsE/1Kj5UKSzVDvFKPTWT8SsIXub2xoM0XvvN/Qnwki  
QejTqtb4bhM0+edKuUQYCRglTGZTao3R7AUTI6EoErAG8b6svG2EVtkPb/DF  
UcYbDI30EDdEfwwHcjinJpgx3td+VVkfUUvllEzkeu6fIRPkXURc6vtV9o0  
Sj3MtzvyDuogLvzx1J3LJDacJEs/YuAaj9/Pr15jQSaMRwxRDWKfjsWDy7f  
oPQDwpwkxvFIZtk7HsuCUSrhOLzsvFINVriyPRtEih2W/Eoh+CR9oGlx+N3  
SFDJ2lE14INHBJeqXAbvk2D/wf+eC8VQ/K1QIEPvQxJ8MIgb3aLw36latupZ  
JQmqzDM9j/fjkbfpklbLQke8IwtmR8goDiL6PyKFhIkpWQc10omoNSvaur3

Oyj9TOb5qfKEgK4FUM3efkqCj+n3l9pXKe+/nWdp2S9IMN5fdEOKg4iK0y6c  
vvKKBCuBof7rQkRUxU0YTnlDARXCjJ3wI0TUVmwYSRokAfp7MoL5LwE9OfOG  
P3KEBL8L5cbMeynv3c4rzwLfk2A+/h71sZsENKxr4u71kQTn97WwsTsS0Mdx  
Tmbnz5R40xu4P0kQ0KzrWM25byT4eXFESobyXltdyzU3myeBn+M5z+ZOPNqK  
t93S+0ECn+gL08cy8liG5Xih9k8KX2pVu2cofpQ577Mm2iDB3APlxieqFD8n  
Vjyn8JcEr4PK78cdwSOBBrfLp3dIoMd+JevYHg5JqEvliO9LgMDkb+Si7zgz  
0784KkCXADIDVQG0Izikeq4qmpchAS4vLdjpvMQh3FyAADtLAqRM5eoEdeKQ  
YajsC8ZDCXD7waCZZSsOWVFvetlcToDSIWfq8SYccrrSzLrNkwB8u9XmVY9w  
yOdodP360QRYl2g0+FCPQ6EP1ax+CCSAgkXYj3N1OBSnQLXzTTgBpsmrZ2Rr  
cSj1+bM7U+IjsFYtfNShBocyjS7gk4mgPdH9oov1TiU/xG/OCCdAFL7bWNb  
KbjEi/Fqj1wCuJ48pxtNwdW/++Senk2AcN57uLdVOES9N84fppoAKsjUbqAS  
hyzov9H/Bwng5PAmKaAChx6y/Fz5pJkAS/GHOurLcGibc2c8C58A4/nH6XNL  
ccjoKMMzom4CiDT9Pi9QgkP3Thwu3zVIgNH+3F7iPRzalBTMqjdJAFFXZIH+  
IhzSkZGK9bBIAK47n4Tf5eNQgZKSG79NAtj4XCL75OLQT9A2HLJLgG/A5jx5  
A4e0CMZnUxwT4EG038LhTBzKMbQTVHVNgGs/SISZM3BoycKT8adHAtxsaYmt  
u4hDmH3or/s+CVAe9mDwXxiOzfpfnEwJAGelh/W0IrCieWQ3Kqu8AQo4b5Z  
IhGCQ5ej79+MjKac13ajMs4Xh6bJtaRT8ZT9f0nHKLjkhFxah+dXcglcs9KR  
17LHoZRrr0xykhOAhkZjJ88chz7kjKjopyXABT+eP1J6OJTw4AdL07UEOOHv  
zDWigEPDVX83vW9Qzv9nPGFAEofEG+mmBXIT4KLE6ZohfhyK7jj0aiQ/AbRj  
3V4MHsSh/i7+urSiBNDxjf/2mAqHhPokbmHFCZAYHCV3dVUhb6TT1p/QKkH  
g9Wo/CdtdPSLvoV9dQLQDrTffdOsjQLmrTGO+gT4fYoqtuSeNnq+6ire05gA  
biLH7AovayOvvditM50JOBnc5njUQRs1H60qoHuTAN3b9vRve1r11JL1e8VC  
AsitMh5KOqmFSuz53jouJ8AHZaGxTWxaaMtVtIVrjZKPZGWWW+uaqCgEXSL9

pfSrVFdCdZsmWr7md9rsABl8T2Rn6+A1kUZuFA8DMxmw9wctH0toohtFyfs6  
D5JhtkKBh5VZE6lWF7wT4yZDYlnsVtBbDZTW1x/+T4QMI8LHSwQcNJDtuUtV  
exJkWPSP/LutqYFOLeC/0Zwig46QTPy2uAaiiqQ9ekCGDDmfWX3kD2qgof1P  
TZgVyPCCyqe0Y1MdFWfHXmRTJsPzoWunyz+pozAR5SeciAyksp5tjl51RGjY  
30TRIMOPD1ZMrI3qiE+zXoofR4atxjSL6nvqaGnQ30VQhwy510res1xXR500  
J2+JGJChuWP9Cpakjq6uzA1KmJCBkNERYhOujpzi7h84ZUEGJQtiYoiPOpJj  
ccJkbMgQ4zHdeM9ZHdHnHwtTsCcDFc9rxl1bdTQuOVGh7ESGxibjqFwrdfSw  
5eZX5EaGK3ntV0kW6iiKYMan6UWGSA6z3EUK1htjM8b7kcE11AHrt1ZHx9ze  
p0gGkUGbQ3KZeF4dra5f7DQMI8N++FsU4q6OniXiNkyjyFCgGD/PEaSOsthp  
TlrFkcHrkIzvxzh15HbnsZMtmQwzTmvl7y+ro7PSMbkOyWQwe+Z7+lChOmJ8  
fPatSxoZ6LuNE9Lr1NGk/ga9ZwYZNGj1/jPrUUdVk7VqvplkMOFgbAqYVkcck  
b7+QwGwyxF9UqlrYUkcmW5LloXlk4Nxjyevl1kDCF79/jiwggw3tPTpeRQ3U  
U+JgSC4hw3GxjbgTsRooT54/ObmMDDL+KUWr9zSQT9f79rQqMhwpznc3eKOB  
2L6YSF5vJE0+FD3LlJgm+hJw0PFmKxm6qx7tClhrooa91zdvdZjhObSgneuy  
JrLk16Yr7iaD4emh56o7mki8Yp9qaS9lPYMIgTglSj8rdwZV9JOBl5k1ICtC  
CxVYKU43jJkhrLOT1YnCh9nrEm0vZsnwNipU5rI4DjULzf58tUAG3Ll9V06F  
41Ba7V3x/mUyDNfKdgVT9ODUwJHs0U1K/Ebr5e0UvQ5jZA38Tp8ldcpPeVhe  
ERBdwpoog1gijDF7lrzp1EVTX/nub0kmwi19Ul2mgB5qxGmeWDqVCAkqXT9R  
oh5yY846PqCQCAsz92FdPVR9015nhu4RKiVl32+8NUAFWzZZSfrJMKyYt50  
p64hCrNL5owwSIRjL/n8f0oNkeiJMbZzFolwarL70zpmhJKrIhgE3RKBRvLd  
7DCtMbl/dCeF3SsRjhpng9ljJFCyCs6Wr9EIKT/o3J2ovgjJT7q76GJIBFy  
zORPmzHqzNcgjUcmAjr7oILvuzHK3vPafRWbCCdLRc8yHTJBuBdtWxUXEuHD  
8i5Fz03QMfGZiIKLiaAcPrRBl0J5v6Yx/75yORGaWTOVE8tNUImR3a+gG4lg

1N/LPrJiguLqLwS65CYCU2mnWspBU2TBVbVifjsRxNav/46VMkX0k7uLZ+8n  
QjduHLfubIqmkJiX5MNEWNx9GmwcY4oa7xjOHalMhIZ0sn1VpinKoI1wY6IN  
hDXC2NDfElPk5l40s9uQCOHpsflCLaYI9fY4rTYnAkeNTAr3K1PEJfVz+nN7  
InwpeGLzctQULV/hPf/uSSLUs2u38X4xRd1r6h+7uhLBbtFlaXPBFBWYe51r  
7EmE25s843o/TVFYc+b7B32JIETT48GwQfHXR9osc98mwuSEQArfpikSjfs6  
kjacCBbGbsf81k3R7jSTWcx4lJhIn+BZWzFFo5pyQ76TidCEM7LPmjNFVSW2  
RuenE+GI0+wHjSITlMxwod9ohlifo6nwxnbemyN6nUk9jLhF2p6SPxzwXRQoD  
I72yS4nwb2K09UuFKWKV2SWIrCbCNucrOZZsUzSbjfqSaz0RnlpShc9Hm6LO  
3wbaB/4kAn1QqLervSnKtgl//vdfllw6I7jtp2aK/DoK1Rf3EoHVZZt9nccU  
4QR6Hk/SJIHe2F7ul1VKfRNx1fr3JwGttXC0+AtKfb/xtD9mSoKNRqei+hsm  
qJ+grlx7MAkm0+t/BTpR6l3u2XyXIwnCEdt54/8o9WbNVMjiToILNIF92Kox  
sghsbbhwJAleTPSL/Efx5/sVmWo9TiRB+7aLVo2oMRLnjA3mEkuCjDw+W9bT  
Rkjin57J8l2QSkPik/sNnG6GM8qHW4zJJ4HT/tC4sGylugbyuUUgCm/zm5hAp  
fXR2hyklSSsJokkzGX3+esjmQyxRhpAEf6xvtL+t0EUFWY79lw2T4MOFZdp/  
XDpIlEFiXMs+CZaXbbLvUPwQYTYvb80xCcrK00JFX1D09DmzXZFrEjhfYYu8  
Nq6FqmJXP//zSYJ7LinVFFY1kMJa02JddBlwz21ps79UQ1YDEIUO8UkwdDL0  
K3upCoqquBXAmpgE40LI2TReCXW6xW94piWBltnl0Tds8kh7ArcnkJsEbsZ1  
ulFkMeTW3Py0Pz8Jjj6g/nS3Xail3pBMiilKAg6i17BL0hFUFpSPkyxOAv0b  
FzClj4dQnyErw/iDJGAs4m9QUKFGyydJry+UJ4GqTNaB+85jamyMa5dlq50A  
/SrzhTd1vzpkvjsbfa6j5G/1aPxyB02nWdcl+5XGJFDLEbz9yIOxM+wOfkS1  
NQIYXWIFDBNYOnPiWm4udCQBIUb+uEE1c2fruf9sc4mgSuNSJZ23v70yb03  
j+JeJEEDlsxz7d2/jt3DBz/9j0Irlj4f668KIKKKkQpK97LsQxzHGvi9JoYS0  
kiRpIYnZzIxZhCSplKVNJUmsRFkLSfhFQopsKaVSvd/3z/u59557nucs3+d8

Zr42pKDALbNFRV73rZWIKf5iSwquN74VEVMhBKS2mTDPthRssRyYIF+yHMJv  
hGv8eUXsz9JurndcAxRG16eSNyl459+SwvZpVSja5XQt4L8UVG243flhiyaM  
K+sYlA2moIUTGxevMgLJf+dndoykIG2oa2JDhQkYvJW6JzVG4HnT9YELGyA2  
86vFvi8p2CXZ5f6gYyNkHto5Lzubgs8UIHLFe2uo8HpT/WwuBWWqreWXvrCB  
Xl3nU7HzKfhQJ3erTxPC/OKHdioCqfiixMnzYxbxPf6ks7BtQSql/A/R3Yn  
AdbnNSSIpmKyyPffjx9JEHppaZq2eCp2OW395bHTDk6fTHbvkUzFAXpZ5I9a  
O1AbLgjukk7FyemXI5WCZKhzeh75amUq+v7s6xZdQsb4GE1ok09F5Yjc7RoC  
ZBCWlmC3KqaiT4eF6GyvHRTE6eU1qaRifFZNYmOJHZE/Xjefa6Tibduog20x  
dkApOPPiiR5xPs7k8Po5EpHff3VRqkoK9fwtuMhCZ5H9k4+NEvFG+3x+0NT  
SLC7Y/5vhSVxXifl5YJNJBDBsFaqHFIR7q27PWRAgqJztmvkvLLRz/84P0uO  
BM4C4fqIDqloc6JQ5JE4CcbCKTY3XFfxQ052k6Aooe8aizxLPAh7eq2nwol9  
Lb3m7YU+qRhX+SxtRJYEzbyJAwX+qShaLXyIqk98/39IJV3cmooLLKgbHD1J  
IBFkxMnblorbtT161ONJcL3GL/9caCqu2vLteHYRCdzVj5RmR6Si0eT5ftFu  
ErAnH7bxolJRTKhTclDfDvR8+wfSY1KxLinkrVuAHby8L/CFGUfgn201hiTa  
QbSCqiDjWCr+3hU0uOaSHSw9Zb+MmpiKYW3N8ilP7aD0wy7llORUHE+V3cUc  
tAMvF4bhKQph71nq2dG/djB987ptliMV9aktpyiyZOAuf+I9nJ2Kxs/H14bp  
k8Eo/suOeF4qNIFGDp20I0PH2+UxhzNTcar+QcJ/fmSIsTVLjSlJxcKUCOsJ  
YWSQvhrA05CXil9rx+/4HCDDncXHL+2/llpvacc3xBB6xffA+Tt7rqaiuzqy  
qf9JMnx79bg2oiQVP6obm1qlkCHDfLAj7GYqXruZ9VyDSgaT88JDIXdS0fWd  
yQlZGhleC677GlyeirTu6cHlxH5chPOCwMpUXPfdtpq4v7K5n3LA6pT8XNh  
8Eljwn65Plt1U20qZj/uHdxCvL85o9TY5xnhv4rU7TOEf3NzHXaeTal4b2ZA  
4FM4GbKDZ33dXhD552kW6htABvPaVeHOHal4eetseK8zGXo0LGMdulLRzUT4  
7ElCjx1LC0qx603Fg3+c2PbryCA/nZiB/QTeruJOveVkkqPS7WGA9Sjx/LzFv

Tei5wAdPyyxHUjHROiDj8Ac7yE0We20ymYoeUbh5dykxX3zU+mA4k4qHUoov  
rufbQZ+r+6ze91SMOMDPXR1rB4oreCs0/6bisEPy0GUDO7hQuNp/jSQFQ1Ki  
ljGziXylUEu6llFw/UEf58ZDJljd+fVv+goKOqmpP33tQQIn1eZCoTUUlnq/  
QrVMmAQzecd+ftSmoPzuLOXxg4ReThhxv6hPwSeRu76LedjCsyCfS1uNKfjT  
X3VrgZYtnJPXcm21pGBZaF/szQ8I5Mye3DvOFPxh35ZyeCeC3mH7L/vcKcj3  
OLxt3BFBzu+2vbo3Bf9uXiDD1UYQNI6T0+9HwRER+fSjSxEml9EnswIoOPfj  
dsyRCRvonv5G8g6iY03Dx309VTZQ+zIka3EIBY/m5Z52TreB6zdbPj8No+CB  
j9SRyXAbyGKZY8luCi6skhL/YW0DyfsLMsz2UXCsJGV7urwN7HddOjoVRUHG  
n+aDw78A/LVOWBfHUPDh+jEblXcAuOgTNzSOgtsuDj2PfQ6g9cl3ZPUxCvq+  
rRIVKwNY8fyx5esECh72OPZH9AqAwFXtdPYpCl7fr1SYnwMwlpI15JhKwTfX  
7gr9zQDoDFtgLkinYGeSuaQbsX5MOsCsZFwJeTu8/JsgBLl/wYOcSjY+Hi9  
7t5LABkCjqa6GRRMWH7einclPHdHfpIFgVPt8l82/oMYHe1Yv+FcxSs3Jfh  
PT0A4HOeYbTlAgUXbFXyTRS0AesT3ynSl4n4Ln303WC9DawPDP2v+SoFQxcc  
sDTZZAPsli/0U0soqFJkqVBGs4F5WcsUuEnBQ4fUct7W2sDIjyvdp25TcHWk  
bM+4IEJb1zLd2/coWLDe6PZndYSH9xJO7X1AwY6rOzqT3BGuzoy+Vn1EwcUq  
xba18QicQ5u0+mooWNq5eK6+EOGYz5PEzDoKwk/a94u9COGGuq88Gyio3qRu  
tX+ZLVhMCZ+ofUnYkzuxapRqC4N7y1oL+ykYcGvl+UVsErQ4K6nsGKRg7Alt  
50mdJLi/nhknP0JBskyK5BsFO2COhK1lTRDvy1oQHcYOTEOXH4yZp6BRzeKt  
nl/JoLHis4ScABU1ij8vKbK3h5UNtUWPF1DxmcBX9T1n7eG7bsyAhDgVnFvp  
vl/JxHz0s82zUI6KjeM+QS9LHKHoetFn9zVUfHFr4p00qB0c3Z5E/aZExf20  
r48HhTvBsXr9x7brqTipkZfapuwMe+NFAz9pU7H8b5RByylnCNR+952tT8VF  
Po/OS/Y7g1t/Oc/Umlolidid+ehq7gBWxrfFwjIq/MmcxJckFdMgRTcmWVNy1  
/NDBC3UusOaHdYQmULE6gZBKf11AsmSFUJstFT3PXUzequsKf4MmzsfZU/Gw

4UjwoKcrTERVW6xxpuJVEf9Vyjtd4V1t7uunblQk91leX7zfFdoOxx7c60XF  
6wn9cvwwV6hZ77ZkmR8V3a4zgm+6uELpf6rF9zdTkaZHj/VScowL7N/kbYFU  
vN2oGhQ55AI821cDwtupyJ9gaemu0Dyt5IT10KpaLVG/lW8gwvEFCbL+kQQ  
9j/lUjZ00UPY1q1lc3uo6LTHJtad7wzkmkXj9gepGDtNrXzc5gQmh95Tx2Op  
uFgr6WDbPidQ13igy0+n4qtEq7VcESdYyNwdOHCSwDdwZfVpc0f4DviDcpqK  
vkpXGsJfOcdHL6v4ulQqRr6X0Nwc7QANm583HWNT8W9jyKLrd+2hYvGFCGUE  
FbOq3ZQkAu2h+FGcUMMZKv7ooJoli9pDTrRHxtRZAn9fkqJPBRkYqhQWK85T  
sebu1fK7xPfgWNef1w/zqeils/v1iC4Z9tjfHwwtoOLyNSa+xV/tYKvVjSWL  
iqioEHRU7METO3CdSim+dY2KcY+vtr7Kjvr3pSB7/1sE/jXax+8ftQOdTSbv  
5+9Qsdj18KgyoZ8UxCQSLpdT8YrSt+m2QDuQeDgk61JJRe+YlXuTt9nBfOTD  
sulHVBwbP9WzN9IOJpT4XllPqHhaqeAaLdk0+l/tHbeup2Jy+Ud/9jk7eEEh  
0YYbqDj/Rjhr8r4dVFvIq6W1UFHm5t11Cm/s4Nb4l8eGbVSc2XG9jj5nBxyf  
iz8S3xD5JBokPW1DhiSRo3z1/4h8dT1t+YL4/h2s8Njv6afiv6Wvg+/TyeCj  
KLBLboSKo8+7Uw63k+FJAM1LaoyoB/5+ldlZMhjwl1qKTFJx4L8y0Wer7OFC  
a7bq7y/E+64N5v4m9iApprzkyyyRTwm2Zrdc7CGBVPx95CcV7x9SEmjfag/j  
JwwH3v6horruzsYH4fYQeP9BY4cgDX8XS/2M2m0PTV9s7zaI0NBybO36zzvt  
wUKnKbd6EQ0HJ86oGgTbQ1GED6VsCQ0/j0hJgYc9rLrYe6BkGQ1VGL8lPKzs  
gJf6Jb8FTTMqGNtPaBlD7b1p/8dUafhxcyAGxeHyFD6T3w0UpOGpvXadLkO  
MihaZnSE6dJwYdqVsks1ZGDFklRtMaSh4rTA10VbZji/WXDF05SGUoVdat8u  
kGHfqE66vQUNbU6VyOZwydCrei9+ozUNbyeeaDpD6BHnbdahhrY0DL3gZvmR  
0B8V2fWu6+xp6Dskv5sdRYZ1r9xN1zjTMNXlo2/aTjJkLulSX050w7n023/6  
gskg4rRNbJE3DbVe3lKL20yG2OSRL3/9aJgw7Sst500Goaqo/74F0PDcBn5V  
nzsRrx/f68aCaChfT7k17ELEy/DkzYEQGnleOB7xIPSLwX7R7K5wgg/TqQsb



ifWFq+mnWnbT8OGWzHstxHnJ96v21e6nYa6DP1nFgwwJq/P9KqJp2Kzg1B3k  
S4bxTevhZiwNB+ZT/uRuJUMgp3RdQTWND4pq4Alif5qazJflnKdH8mCyTilR  
TxYiT36lJ9EwSPGne10CGYpsnldTU2g4tC/YMIRNhlXH2luP02hoHcEILbhl  
BkrZlvsHmTQU1DsbeFs+GWYn3+fv4tCwbuhSf2EbMU9o7mUEZ9BQoajGtmic  
DK/CZg75ZtMw/5y46itxeyDIHQ2zqXhSH+upLOePdzuFnK0yafhaR6Lo+Vn  
D0rL0wxMC2go+ea7SxaCPaS7L5fXLqLhmtYv1Dsl9vCXem6B8nUaks9krcj5  
zx4ia1UnVpYS73kj7j2w1AHezl/rkiijoYWi0zJfZwdw3WBSI1RBQyO11Kyd  
FAeoPFhVPPeQhufj2mnPnztA9kjLieGnNFx7ef7t782OIKq8KaL3OQ099DtM  
IK46Qlxgn2dbMw23xEtlM06gl/bhErVKxqK/lNrWXzWCaQqJRv5QzR0fpF2  
ET87Q0PUwHf7jzR0E83Qq9joAkmqd9TmxmgolmkQxma6wAxxU1LQDA2feG1N  
GtNzha7tuRvUBek4c7ynfn8hN0iXidr5RpiOnwomrg8+dQOnRhs+XYyOX7f+  
qXu33B0eGA1NTkjR8fUiO1mBO+6QK6J1tVyRjoVlbUeGhjxgU+XvV7tV6FhO  
1So5o+sJkgdaBVdr0HHt2o/xs4c9Iak7OvikLh3NcGAF558nWLBlaYaGdAzy  
u6TUstYLZmxlHgyZ0FHwfGmjDHhB2LX7Mk5WdHxy/am86GEvUAihk37Z0JGV  
YbHzGMSLOmUCo6/b0VG0Y4Jaf9kLWI06edsc6cidlfVrve8FDol/m5e60vFY  
+tecuEYv+GfU9rPWg44yBuW6V7u9oOLjxXWHfeh4b9fZPvzgBQdzD21a50/H  
O89eH9ee8gItb/vTPVvoGNx3ucfluxcMiay6nRZMRwkrq4bTv7wgt/JTv/UO  
wt6hN7IPf3vBpgOvEtPhdHwufTP39U8vkFRjWl7aTccT1+bUKr55wfPu4N1+  
++mY2jqV7DjuBUks/cyF0XQ0X9RC3T3gBeYkwbqKQ3ScnKwXFmj3gi/f077s  
PULER3Jl88wjLyi5VrB2zXE65v78dk290AtCQ+LcXybS0dnmXHwC0wtWr3A6  
fiqZjybRtkLvIgl+GuWKjSl07FFQktd3JfhJ/Nz1gU7H3ZcVbtPVCH6MHwln  
s+i4UFISvX/WEpyyQ0LmM+j4XUNRkwWecNDbiH0zm46lhmUPD/Z6gNZC4aqQ  
XDpmanPSy6I9IPdA4ar6y3QcL3l5fhPTHTapHbU/UkjEU4qtWbbMHSR7XA5p

XqPjHyWnswe5bnCSNPmCdYeO3xbtfl4oyRXMfzyetymno0aNypvhSReYvsbV  
mnlAx7L33Mi1AS4QusKU4v+EjivVLNvvyjmDw6fj1mnb6OjYUzISvMUBEtX+  
Vih10vHjllNHxdLs4V5IkolKNx3n9ISflC0ng1pPirb6AB0pA9x7e+ZIINjE  
ktOepqOFm4ihWySA+cKlZ3S+0XGKObdG/rQVRJN4S/Xm6LgvczBjYY4l9Fdm  
ihoKMPDK78mbK1+aQdW1C7NmSxm49PSe6fWDevDto/JBcxkGlor4Gd3apA3a  
agXjFrIMFjs5/mSgdx3k5BYNWSkxkDKlPTyvrAzt3VrbQY2BZpNSEpSXq0Fs  
xY1em/UM9L/CU33DWgFHWLfbSQYM7K1Jl9wfvGbuNhq7k00YqE0m13w+OW09  
llLeYG/OQFzBzGsXePVoDcmc7GjFwKajK1TkP8098kusfOyExHm1xzna30Sq  
mZVWG13IDix/6VBW3S1Z/fr7dbmrEwOzPp7IF2Utr/5lZGvk7sZA15MltjX2  
q6qNDjy94eHFQHDelHH3oVz13mv2ml5+DNyZMXtrd6l89cWPzWu8AxgoviMt  
452qfHW3qouSbxADL91aSZjdKVu9NKTlnF8IA2VOZIVIU2WqHXM9VvmHM9DI  
Ourp8xOS1YndbbzNu4n3XL4K5DQJVpfl+Epu2c/A7NXbN+Z4Nz2a8HpN3xpN  
8DIWMao7IABqrM0iQbEMHLNc6ux+YRkENfYkBcczsHPTi+3Xz8pDk23/kZAK  
BrrXx06d+aEOQokhX3ekMDDC5bLcO3UtsKgcjAqjMXDhn5VaIRZ6UGT0cWcE  
h4H/piLup4sZw7uoPe93ZTCQuyzO02bQBFZe+xy0J5uB91tNXQ5mm4HHx8ju  
vbnEfd13xjNa5pCqOu27P5+B5XoxErVnLaBqe8zLyAIGGryafDUwbAnfzn1z  
OVDEwEr5TQwPCsvQ7o57Fn2dgTXCV/TF11pDqMxP25hSBnK4/U9XTltDjtfx  
R4fKGFjQesY94zpAO/OP+eEKBvLexWgHe9mAWOPJsrqgBnq6Gxb1v7cBFBEy  
iK9hYjJwrJutAcIR25RrR+sYWCCYuK+HmK9vJixcd7yBgbWrNufs5yKMPKBd  
OtFC8P14tu7WHYQ13xcrJrYx0PygXdfmRoStC380709kYNo7H4v5ToTslR8v  
B3YzkHEg2q/7NcjrjdcRLm8ZaH/AWuFKM4L0hqeafgMMbNEJTF1djuDleHt8  
3TAD1b/vTfmWgcDafOHWyk8MjJGTlBzdhdC0ixUjMs7AquEPK+/oIYjFHzf9  
NsXA367r1i3rsAEH2p65wa8MvOZ/8luLrg2czt78sP0HA3tSxw+fjgKokbJP

rPnNwMTD/53XOWMNfyuMbW/9Y2CyWuJm6atWYNWoLJy3IA1D1Xblj5VuhKM9  
Us+ZomloNjwm5F5BxOPnZ7e9Uml4979PkgIPzcFoca/UluVp+FHfe8Ptpg1w  
QL6hw3FVGkonbDps9doMxiwLAtTXpmGgJU9P/bcJrHflrZZRTc0/z36tG5Uz  
gZ2BSf1C69LwbOp243aSMQwQU9+AXhr2tCWc6H1gCIpMl3UvjdJQ7Ngu81Bx  
QwjMNR97ZJaGGuwbQv9FGkD2dY0b1y3TMM2szWS6Xh+6qmSiz0Eaym7ftDT  
rQcyrULGDFIaPr1jGty9Sg+8+6Zn4x3SkPp26rsyRRfYE/0Vu1zSUNjCVua9  
gi60/Gk57u+RhjZ1UX+PduvAYsmHYO+ThotXrdxaWkKdJorFgib+xLqps1m1  
XgdS9LLqVLamYd9hp7ninzpQC6nUZdvS00OuZMq3Lbog4HnIRSA0DReurl9e  
/VEXrLfvWDK1Mw1P2C9ye1KgB8cOeLb17UnDo83x7RU8fag4ac1viST4uRRQ  
cGuLAXxP1/Z/eDANqzXWX9sgbAjG+XJyJYfTUPHR0ZftjYYQXSr6NvtoGuYa  
5YYFXjOCmzWzedSENOz07X9wu9gYxtuGdsSdSsORcbbanXoT0HzfrrYzNQ27  
GudnLQTMIOll44+++9DSE+3FJGls3QIHgzRISi+D/l0vKTZ3mMLgsN9KQm4bX  
ooa+Su2zhLUqDA0IM2moTdc42CZuBTmkiPI/uWk4Oun/Y2SbDXBOK9ZWXE9D  
tUtWo3ZLiHmJL5FaWJqGOGk6SW/f24F4wS/HzLI03K2QzeDeJfRnXVfroao0  
HDPIWvXKxQGedtZxQmvS0P2oaHG+pCMIfLjj612XhuVK15olWhzhuEh6j15L  
Gu7StR8kGTiDEOfZQM/LNPRXi1NManlGhvfjymv0lCI9aDaOMgFlloxdJ/  
k4ZZ9U8ji4ZdIFs/8ntvbxqys2K4v4JcQamy4E9qfxq+7yhb11jpCoXkt8KG  
g2l4L2vbWepvV9B7uVzi7Yc0XDdyQJit7AbIW1yXU0fT0Kz60zYZHTeA4WR5  
o4k0fL22sUh+tRvUR1Uq902n4XLxZYP5k67g9vPLetq3Njw6Wb048KordJ7W  
NDCeS00XxDcqunauECi5Y0P/7zS85FCnNPLCBQazs4H+Lw2N79cwegJd4MsN  
Ufd3C5l45PY7MY9jzhBvbuPHWMxEp41Ca16K04PA07hAU0kmLos3fNyZ5wSS  
3R/2pK1goqJ4+Y3IRkflDF1z0EyOiet2iP8S2OEIayb84t8rMHfJd8WLVMO  
UHCEeZKpxMRzVSITnXkOoCNUR9mgxsTD6bykG04OUMb8zRpx8RqdfWJVz/t

YeMq4zMsbsZST1qZOt2xh9qLe3PN9Zn4MLc7YHGMPbjoXLo8ZMREl4Sfm+Ut  
7KG9vKeEbcZEP+ULRvGi9hBgu+yOhSUTG2iNn1T7yDDQ7PRg2JqJNmGZztQK  
MuzyT6pJt2WiQ5/if75ZZJgcuP/c0p6Jk+t8iuqOkiFu39SLD07Ee8brVyyqE  
kOHPREYXx42Jrl+y6bnEPJWStK1voxcTlboxzd9EesyCAhnjk84svE53ZaK1R0  
ycA/0/qZu5mJHQ8sf1xTJ408kshXq0AmNI+uj9mtSoZLJVa/Pm5jls7Ujp/V  
IIOWaawgP5SJNWe0mpL1yXD78TUxiCDuJ347sBPIYO4yJDW6h4kiebJ2KcS8  
VtMpvyojkb3iF2kTMxjtt9FG00MnGJradIEjGvvhilq4/FMvHrFe/q95Vk  
8I99onMmnolWC9jm9M9k6Ps7Z4wnmBjoPN9doWoP4XSDjZ9PMnF0d4bw3TBi  
fl++m5R5muDfx0Op8po9HMq74GxLZWLud2Xu0nl7+LX+jdc4g4mxjy9a3/Fz  
gOS7kgFZbCY6amZfWXDbARaBw3YSj4m6tv9dXijlCLK+9yKzzxL4F6lFVrxw  
hPy+8Vi780w8Lyj76I6+E6zbrXZiMp+J5aamN2Y5TmCWwGeQi5jo//75kXEf  
Z/AtPFg4XU7ET9P/d3WTCwQ82DI/VsnEupIb+901XWFbs633h2omDh084hFI  
d4W9U8t+9zxi4j+jNDE5SzeIFvzl2dnERJ3+PXfVmG4Qt3yw4MULJm4wHD60  
vccNTqg3/WzoYOL9FLKxv7I7JG+44/G0i4lkw9e9Z8Lcgeacc/lRLxN9ubdr  
b1xwB3Zg8tz9fsKeuyAVX7tDRuRe9zuDTNQLb9g/uMADck76XLo+wsTSZzIq  
qtoekM+1/HF1jIjPzm9+PBcPuHpZxe3iJIF//Ddxzs84Pq9xRfPzTCxYuWV  
z5aEPr/9fGb2zHfCn8W8a/zDHlDe0+vC+cXEud/OF7cc9ICqz7UXGH+Z2Nbb  
e0whzANq/5R8SxFiYVaWz8g+wn6DFN/55EIWXIV5zH2j4QEvli/nHV3MQv/9  
etpTP9yh0zjs6yFJFv4NvxlCeUQOvfauTIHSLPw17zZAJCYwsNn4/O6VLMxX  
kw3oVXGHkT2rZ0LlWejasiYOat1g/PgCx2BFFvoM7/uk40cGM6zP5zarsFAy  
eGmwSLcrzF14Ne2twcJeDblkqrsr/L390N5Ni4XCFx6obL3nAsJ113Mc9Fho  
9bWgyWilC0h9OkTeaEb4Z/Ny7aIGJ5D5FXjW1JKFOwK2bfoi5wTyEuRjFWCh  
m2YsqXGXl2gYyGSrObCQY9rpu4boFxBf9nmJPwvXNDx/rvmPBGRGLoptZSHr

4KRumDUJXHJTzghtY+H1zW/3mx23Bf8aP5sf04n75kHi/yZtIKjDKuPLHhb+  
t6Hu5WNivggdVhv9HMnCdaa/I7ZWNUGk2Cvx4DAL626u1H/31wJi5Ps+9h5l  
IYIU98jxrDnE69RbvU5g4VxjuY5QzAZlhBvcl6clfKykc+ZsM0jxOjPSmMrC  
JUzlxZ8nTIERmrCxjs7CyGdn4+W4psCJ3cmpZrFwq9XoyNMjppBJcf9QwWVh  
14TUprGLppCbbWp59wwL3/UuecqUMiP6x5r0G2dZ2CentSDpsRkUVYkMF55n  
oXXJV92zla1QNvCalXuFwFv1dXWHrAU0r497n3qPhSuLCrdsc7cC+XuFx6we  
EHj4uUe+SlnDXtue5V+rWOGbKy/+fmkNla2LbxTXsPC8Z61WQTLA4q1WDiF1  
LEwptbKyWmcDW0ci361sYKHQjtTXTx/ZQEnMhfjWZoJvA4/ja1QRfv1tW5by  
koXh3TUvvUIQXNKERlm+YqFokfyn45kIOatMyF+6WHj4QmBdXj3C2OWdfYW9  
LCytPh3+YALB0iArbls/wa/+kP+wlc3QqxqkVgwS8fATvaOobwvdTr+Kmj+w  
UPeB2YiBqy2sf61NSh5l4V0m9/v1MFuI3xH8n/kECxf92TCiFm8LDRPs2Klp  
FtLMXSq0aLYge6xmydVvLKRHfjrgxbeF3QtnrgbNsTCsyWjp+rO2UMFTxeXz  
LlxOcM61I9aiazf1NP5jofg9t1WmxHn/a5SYpAVsZF0ISmFTbOHqhgrxDaJs  
dN53duR9jC18fzpaMLGYjWcdVG2fbLYFB6/VUCDJxu7t8lnVJraQ+dbtzVZp  
NgZ9yPu8b5EtjOxOjF62ko0nRdptAwn9bjZ7a1GDHFF/si1XMRsh9dT7S4lr  
2Cj7svqfozdC55LlVqbKbCS/rozcl4CglkN+/VmNjZXbml5puthArEZc1KX1  
bMxbVTVzkQBQd6dQdIsOGz8ZphkV5FiDjE1PvpQBG0HnyCaNy1YQ3rzY8pkx  
GyVjXwSQCbCguHI/cYb2dhp/Ug4LcsCSctM2pe4sPEM6/yVs/6mwLu4c2+d  
Oxtrbd7/CCCZwKBu1oLj3mxcS+55O6lrDMkOv0w/BbCR9zJeP1nUEJ4cqcmp  
3cVGN9aU/4LbmrBUeMb46D42kh4/ZofcXAchHNVW/QNsvFRP0vtVrg4CxZR/  
uXFsp02h2JdMKYOXaUW27zE2GvN7WAUqSpD/ZNRwcSibLfwWVdu3KgD2uoUf  
SSX8X21/UWD7SuBEJP7RpbOxJqL5evuJ5TAwcytzmMlgjW3D7dE9S8Hg5Hv9  
cxw2nnihOyE5IwEnxZc3emew0an9lWDiYzF4kUUOfctmY3J6w41TqiKgqBb3

u/ocG+M75R7t1xCCqNLCjMMX2Pi2t+SH6sV/1tVWPbo6lwl+3aT30/zmrWXO  
x0m2XWWjQrJaye6EX9Z7/yyf0ITCRp2lv3O2r/plXRN8++Wqm2xUO3/g92qj  
39Yrqz1KH95mo9jLQJpb3x/r/YrjnO332Dh+xe2fp4wg1CbSDy54wMZnb5NY  
g8uEQfadhk9hFRvlt29wN50ShUibOiPXGjbG/H2bu7ZMAmov7Fg+9ZSNIY4H  
Iq1MloGswL+vvOeE/zGdRhIMGYgKye00aybydU9n697tslBXY3Gv9wUbN525  
MmFXoQDyym/OJHaw0SRNNIKgRQmiT8XGqXQR960CDtXtVQUF0q0Ne/vYaOVO  
ndogqgkxl9xkJd+zMb/sLT9aSAcahMbmbg+zsWDb1ekF8voQ+1St8udnNioV  
W2RfbTGCZnKOFf0XG8teJGrO9lrAMcdU26JV6aj5WKyvs5MMbYUqKm6r0/Ht  
4V35qwbsQUOsRmhaMR0FVtREnZ5wgBO7g4f4KukovXcgsnHeEToafj3doJGO  
2k+UzaoW0sN6zeyC/zTTkb7L9aPFZ2dlpJumntRNxwHKrKD5VRfoHO3YqWqY  
jgZrlSjlG1xB0yXa4blJOoYZNB+6d8EVEkuWrNtnno5XKr83mfQTenrxNVEp  
q3T88ehSmslXV9Da5/Tpjk06kixf3isj9pOaPzT426UjVf+E8718V+jSPI38  
yyEdaRe2CLpbu4IOU4mR50LYN/tTW9TuAt1uga4j3umoFON3678ZZ9C7MafN  
2JSOQqvEeu+cdIaUJZkSelvS0XLfygSxxc5g8KKt9XBI0t5RttPRX+UEFL2o  
m3Lh6fjl9A5zgRxHeMsWT3+0Kx0vugZlC612BJqng5flgXRkLW6emzVygP5b  
QwbFMemYnvg0y7vFHkyWnlrmHpeOkyVW2mej7IERrTgzfTQdS9LN7rbI2cNA  
2800jIR0rNW5rT/eSgYzwy13zU+lo3ny9fwfDDIQbZb/NiUdxTnrF055kWHw  
Cz82iZaOKn1HZ/PXkmGDj+EmNWY6OgXXWN+asQMjy5OnV3HS8XXTfaHN9XYw  
oNx6e3FG0ta5qT3yybWDskWrB/5kpeP+3mUW++LtgPZlt+SXc+mov49J2rPV  
DoJ6yq2GL6Rj9PcLV1bY2YHhE+F9by4TeA4F6FkY28HCYp+zTYXpONvzpChX  
2w560fnPH11LRxHlTwNiunZwM35ytrRWoirim0s05nZwOsRKreAugVfvXKWi  
hx0EODF8su6n4+Jhm29bDtiBjkF3EuNhOp7Z3L76CeGfgKzGrYTH6ViWFPjn  
/7+/vf53qC/6aTq+8x8LNyPwlnx8lh7+PB33ttMVuw6TIfGllOXm5nS88NH+

e91/ZPC5H7zb5WU6fuVoVTR72806C9cyrV+l40SdncHdbntoi3L8qvpf0lp9  
lM+oF3AEZcmT16fH0hHPJ3QLRznD99mW3qHjdMwTG99+U9wFmvrkF72ZSceH  
/p7xC4pdIOZG+c5Hv9LRMcx4rcaAK4RqHJGyF+Ggyd31ual6HuAmn3cVRDn4  
qWRWsO6+B5hJ1lubL+LgQxnTk2c3eoKS0HinoTgHMy+Vp4Q98ATx79L7tZdw  
0G3BlSc2sl7wfdRigboUB02Pvjus7uUFA30hOYrLOHh1rXno5GkvaGqnGsou  
5+Dfvk+bP9/xgrL6mw3LVnBw31EVq8q3XpD34PV28VUcjFfwGjsX8Abajfnv  
wnIcvPml03rTWm+luajK/ivPwRxVJemdG7wh6IyL+pwCB+veZpNeOHmDA/1g  
1RdFDIY4FpUY+XqDQUK272clDgqm31c38fcG+YOPx4ZVOLI+Tz891tsbRHaO  
nOpX4+CtoG01Z8jeMB2wRK5bg4PK5gLnLPS9odfNpLR9PQflc7S+CS7zhjoM  
dGzW4uDqG6HFnFEvuGmS3F+nQ/h3blkmtclLstcXH67W4+B2Tv4ZWolXJCu0  
SVQYEP7ciz9tau4F+5f+uHzbilOp+xfGhbR5gr+w4sZrJhyU0eqjbyrvCThH  
7igwI/jszEuy8fQArfF9e/LMOeh9KuxH+VF3+PfqQRbXioMJMb8PvLjnCkWX  
N307QuZgeG+GRGOfI9z3u3jD04GDPgPt21LGHeCZyETE0icOMurHBuZ+2MPw  
rpSeLlcObm10vOwgSgZlnbvVpr4cDJPu2iOyCsGg7++RjZs4aF1rIGJqBoBs  
F8MP/kQ8+YXe5WgFnjaZY1UBHOR8OuJ1zcMStk2/v5yxlYO/pRadNdhhdPpEX  
dYP3B3Hwp90ChPvJZnDC5+hK8jYOpqW9vVYwagJpC+pfrg4h4i92zyo7zxhy  
ypbSv+7goN8Tpj7vohEU7wwiNYdxkFUWlsKbMYSKIUW/L+3kYMmgxcazXENo  
eP617NguDt5zlfK7mmglb+Jtonz2cLB+aujFgweGMKKZtk5rH5GvL+5fe0Uy  
gu+9XQOCkRxsZP9MpUoYgwhTJacnioNrb9p12r4zBhnrKN/b0RzUYPENZspM  
QHXYgQQ9hoMD2qM52SxTMLog8iwkloOeDPJy0z1m4CV43nXPAddKRJ6XprM  
sP30py8fj3LwP9WjBS+WWEBUmMm1x8c5qHrqc5LdrAWw6pvXHDjJQakmv61V  
pRshN27VG4dTHDySJ26TdNgKrq8L4yie5uDpR6+3u2haw8Pum87fUzgYpXG3  
Sr7FGprov4ReUDIY13N505dggB5Lh6orNA4uf10o9aIf4NNn7uEEBgebFR9v

v01hAz9y+/Q2MTn4rHSUlnPDBhZ6aH7SYXNwqdjR+lX/bGDFv9iLwhw02IL/  
+nirE3qwtGbrWy4HP2g+Ol/tiGCyQ0Kmjm/BP1/3JLhFINhJB7SmneFgSGTc  
9UNJCD5PL1PCsjgop+j34foZhNDYKZuNZzmoxY4djL6CcFB940/pcxw8Zu+8  
zfwWQlIX5c5YLgeXtNgtP3EHIZ3asa82j4N9xa8ft1EyDNXVM/J5+BQRLR0  
4GWE6N7+g9eluynpbZ/TEeoyrmX5VxA9IM8yt1XhxCaXQW9la9y8Nf6DzFZ  
Hgi9826LfxZy8Owd6aZra4n54Eb207ZiDvpTBD9Kt9rAz23DJ4qucfBVva2v  
j70NiC01MEu6QeAxbnQXLQSQfXJ8avMtoj76j7mqfrGGdTHPi/Rvc1C02+JJ  
loo1mKkuDxW9y0FShiuct7QC+85tq9+VcfBHyJVrlfYbwS+1pL08nIMXq7bV  
d7laQsxHW8eISqK+11Z4PnMzB3y7s3BnFQe/vZtzPGu8AaTa6aI7q4l+W9v1  
QFjODK5Xtj8Pq+XgXNhrmYhhYzh2a3ZdWB0Hnfq1T1cR+sepQI4W+oyot2nG  
4f0VhvCBtcNpRxMHoSD3vbG1PpQlpxaFtHAwpqLtz5SZLiQfKRYLecHBtk/j  
Zu9RGxR3fGnY1sFBHUqZzAf2OhjftEjzWycHn+xuflrxRh0euljQg7sl/r0u  
FthZqgHDJng0qJuD5F/7rEYqVCDA5JRzUC/h/+GwnXX+yqCheaU48C3B76Ez  
Jk2rlGB2TeOiwH6iXlf3C5j8WQN10hN7tg5w8A2p9WjuagXgiS5r2jJI5IfM  
h4dCHHklmTfr2jLMwTh76VvntsuB/pcARsAIBwNYthtz02Xh74cTY5s/cfDE  
5e10Fuqy0NKb77J5jKhN2FjdSKxzXtaV+I8T9b9idapCpizsqfu02H+SgxPv  
uCktx+XA/IHEvk3TRP/yKyY/08eFt40aPabIfxb7916+6ECdF7y0/b7xsEg  
mUMjXkpr4VJWfjrwdw567Pq776SoMkQzcz/7zHFQkTpBjn+mAjanalx9fnFQ  
1+HPwRsv1UAybvia9zyB55/qrgfq6+DtXjEJ77/EWilg26xZE+L9vFo8hbi4  
2LI0PqtCHxycY3U8hbkoOhWpJRtlCCsgm+mxkltj/aeTFy4xhjvrBtzcf3Nx  
UiVJVSfSDJIUhG+4SXBxNOGFyGttc/Bctn6JmyQXLwlPCJ+esYDxXwdaXaS5  
eObCXmY7zxo0Xvxzd5Ln4qMNErz7CST4Vqt601GBsI9uRRv32cHT+46Sjopc  
fBZZd/LKZjLwru+LclDiufxi0Rvkj2EXEx/Ya/CRfaGevFcLQfQy7yrZ6/G



xek3gqz3Uo4wz3jDjmtwMXC7xJKrHxyh6eTvSbv1XGR0j1f1853gbOxaTzst  
LprVbfvxTs4Zdu+xu0XS4eK8cmhV8RFnMNU2S4qkx8XWL9/FrW44g7Bv2gFb  
Ay4OGq8Zyax0hg7HWy/RiluWnzpdKi84Q77VK3004eJrSUXLq0HOcMDwR7qN  
GRe77occSv7hBKCxehrMufirtrV1M8sJJFbbeIElFw2LYmfeKTuBQCu1Y7UV  
F3vpH+22VDnC18Q2v5/WXNRUmRQv3eQIvYM7tpTZcrHvcPm/2RQHaM0o+Y9r  
x8VjvhHaH+QdoMbha/ABey5SLre23r5lD4UIKaFazlxM21P40HyEDDlBrcOi  
rlxs0gp9q84iA1ty5a4Pblyki913eLuRDKdqto3WenBRecHVX4GEno2NKdyX  
78XFnl6cwWldrBbbXoiwYeL5h4+Nvfj7CCwyzw60I+LPXlSbTyyHXjQTS2Y  
+30xZc3LD0bydkCyblpdGcBFnc3JT5xvJDAbI/7xdQsXD0i0DLa3k0AzL/Bo  
eyAXj1JHpWPvkEDBq+D3zWAujm95XjGbSYKlQhMjzO1cjLcbWf76JAKWlJkK  
7N3Bxa8LnodxIknwfwDismMYF8UDxz5eCSHB2Krnwuo7uXhcrP0dfwsJ+hql  
qEK7uLiw5TejO4AEbccDFg3s5mL4zs/rZ7aRoE73YtqjvVzcmqH0c9t+Etx/  
N7rk3H4uZsoqbDx/igQlXCNOfBSB7/Y2Pe0LJMizOy7tH83FH2v3SFPrScCd  
fZphHMPFFJUqDf1ZEQUSqxaFstFt6PdJrf17CB+y6azk4e5aDoM/UExdrBf  
PG91yxEuVlOJFnhXYwfbH42cLz7KxVffxr2uyhP6+YC+EvU4F7/LmUkZJpHB  
QTn+UngCF7NIUwTmvpDB4lWNGukkF8N8VB6822sPOqmLCtee4uKwbPPmPSP2  
sHw051pvCheFTqdmIA45wMjzQ7oVFC7eebJxy5lwR/jlplN6hsZFqTp7770j  
jjBQ+qjMi8lFVee89cafnYj5YeDRMz4XN3Tt4lZPuMBFLU0sOEPU983yJVN7  
XCHj7cHaU1lc3F/xZfPCYVc4jgueW53j4rWMsMuaL90gasbVWf48wYeQTXOQ  
jTuEFmQ0/8jjokS3s+S+a+7gJKbRducSF6umzIx3HfYAq8ooH04BFxUzVo0c  
7/AA/f330yOvcnGp1cwvVU1PUFEU2OxaxEXTZ4uMluI9YWWbU8/6EqJfnOn+  
VvXYExYlcwMXXif6y5Ke65f+esK8cW/f0A0uZjXUvneS94LpDyohT25xsc1W  
xzvZwAuGsvYN5t0m6k81oqfS1gt6jfeKHbpL5NfgPclT7l7Q9nK3nuM9Ljq2

LZ2Z8/WCZ/t2+a2+z8VUZWPekJ8XVII GHJuqIPYX9/wRJOaDO5fD859WcvFq  
dbXdCnsvKLYJe5ZVRfARkx/Tb+wF+f/tGN9XzcWYrZZnFRW8IPNIiDTWcNHZ  
j8vU/e0JzOXbzWVqifhqSy1bWuoJp28Fb/v0llvNlyL6Ivw94ZhrUEpVPRdN  
VJZKLU14QPTHrSWc51wkS6c8PUrwF3F6S1t4Ixdney1lSfclXhtwHfzZi6u  
Hr6udcTPHVw2byK9f8HFjDXt2cr/XAG/+u6+18bFKLNgUkEXV9iQ7sOmdxD2  
ercXsdguoPbcs9ewi4ueqpkb3Bc6wx8zl5jkPi6+WBb8dOShPXzrcMr2f8dF  
iDd7efEdGcaiHKu13nPRhrf2vpcAGbqkhe/GubiXv8JWt1LEpSutLmkOk70  
7yoFrWdm1nD1jnXDjwku6lv9HDoYvhHOe1hNNk9xce08hvsZngVkjFnK5H/h  
4mYLZrhQ7QZgUCwsY79yUWz5abWVP0whScU8xGmW4EMqoj4j3ASOVJtRFH5w  
MUd+z9AreW0I2mp6fXqOi1pmzMRXckYQ/t24o+4XUX+hLzP50wxhK89oLnue  
i/J5RjoyMwbgrWeoGPmXi29G78GmZgNwatIn2wrw8JH9lhf+EwYAEExp7Vwjx  
MPG2wn+yAYZgIqTLGV3Aw9lyukKymBFo5WmXPxLh4e+I3/+ZtxrBqq71QhGL  
eHgvXrzFOMQEJGPWrbcU52FUb/H8ET1TEJbU8JBcwkOVfkHfz/9MYdpeNad8  
KQ9bQ/qjt1/fACPvIWsY0jysWxBmHk1h74EpZFtMjyEF6f/tYdbQNO9NUai  
sjwM/BQa//anJdR4KwT8J8fDoK431BPXN8L9CfnEW6t5+HKr11E9Tyu4SZcr  
OL2Gh96HW9xm3ltBgbps0+a1PDyv7ibUEG4NOU9WTmsr83DR/pdnb72xBm7w  
ipUCqjx85uS/vNgSgPZzuVWnGg/Hbx34vYINkHhGOrRIg4dT0QZqaT0AJodH  
9QrW87CQah74Qs0Gxvxqfl/Q4uGC1GVm47tsIN8kq+GcDg9HTxbKcS/awCaZ  
qDNZeJzUSB/Zu6fNBhZ/I4fyDXhY21jJVv5qAzWvVuunG/HQT1Vs1kgYIe7u  
zG+GCQ83sUejD4oi6PAbGyhmXP7tI5GXhBAGY/LPJjvzME3f29J8zAayfl6E  
Jlry0CtnOHxPIQ24GXnoH7Pi4esHZx6nHLMBIWn1+cPAwxcFXrfMVG2g4svv  
hoPIw40xgme17wFEtXeciSTxUNAi472UPoDa7eLQPWQCz9LZifR0a+jhJOnv  
dCDek1yqGvDaCtjRm+dDnHho4tr+QebfRiB76TUGufAw7K3auRjxjfBLXyQz

wl2HcTJDGs/+WECp1NtQPw8etpyOunvlozlQ2Bsy7fx5GN1fmn9jhwlyRUmG  
2QTwUDV+6GWApTHMuH/Q37iVh9fbneaHpI0geAm/0WgbD9leazdKcPTBhDk5  
rxxBxN+QF91dqwfj++ob1+wm/Ok4KylTqgYXXHMz5fYS9k9ljXfVAE/7UNh  
K/bzsFz/17jkEyVYLO5isCyKhWxnLucPdayBmjGlPxLRPPySe2LJul88xDX9  
aBSL4aHU8WGzn6KrQKfkRaZwLA//Fs18pP9eDu/pV8IE4oj8nIgTeWG2DDL3  
nDCYP8JDhY5Ty5wTl4Cbs++fH0d5uP8EdnUbLwIhTa2mr8d52Kvc6LrorAhU  
iAlmTSXwUEbsYXh2hRBEfXoT9vkkD7tj7y0nnxcA1YabBh9P8TA36FZmxuW/  
1t2FqX8GT/Ow9Mup+fYnf6zZ1Kcm/lQe6pgqQ1XJX2vyLuOsXirBV8/0/I8P  
BOCXw+LwLjph7/e7WDu5BVCq8d6gI43g30ExXT9xIexcWPGnlcXDij+P3+/5  
uhjKR9hNjek87De+o99tuxTa6ndm1XMJ/3ZtShjIXQ6UK1bhT/g8lLeUe6XD  
WQVWqcsNH53hYa0nu5aCsgLMhI/9qcgi+sUVpWpKiRIUkp80lZ3lodLZ946n  
uKogLXwg/Pp5Hhok7pg50a4Jo8lNWeeu8LD9SMOzV2+MoW7tM8rhQh5efF06  
EM01hbyqJ4c9i3mofiPv9BHfDeD3vcJ3wQ2invbkF/0dt4TqPYVS+8p4WF88  
eqVN1xayF17+Sy7noWW4Tf3qtSQ4dDlvQrGC6BfxuhPdS+1gfd+Z5o6HPDx1  
tG/u+VcyLDjGrbz+iIf/Wgt0Fw3bQ/9KVjHlMQ+bvrbLPetwgIq7tOyQJzyM  
90FNa1xzBL5XCtXyKQ9pC+S8HYKdIGriZjxMPRGfhREb1UadwllxfOfkMx4m  
BB69VePhDKrrjvg1NPAwS8j3xmq2M/x9GmN3qYmHxb9nTEwLnaE7JMroRAvR  
7xy2OCzJcYa7f/Yo+78g8mMo9f3lCGdg5+xcatDGQ7FRG2naEkKfb9jxb1EH  
UV/R6wR9rzoBqTNocugVD2Puvp5OtHaCNQcD+h69JvrxbZf34q8coaPE8+HB  
Hh6GDNLqnH46gLUiHOkZIPDdPa9eZmQPsg8tlu408vCNgr0nToyzGw23cQa  
JviV8fwktp0Mrd8MyLtGeMjfriZZLkiGIq6Ose0noh6WXdpRed00kvXWq6we  
42GKZsPgihA7CG5WXTb7mYcXijK5DavtwHz3WoGXE0S9spdEdbwjgbTI6qmi  
KR7u+U8n3vg6CcYvruxP/kLur3rl1vgkEjwH6dagrzz8JL2nOJLQq5f+W1Jl

NstDYaObk8eMSXAiftG1pT94eLJpyYSWNAk2rxDJGZsj+rGqxC6xWVswuiNA  
r/tF9A+K7tq8t7Yg4Tl/JG+eh4Pm39/ENdrCx88/IuL/Evl2esx3TZUt1NK+  
bvIR4GPFTfYmhXu2kKs+RdYR4qOv4K4Lf8ts4UjtmPFCYT4GPF3x1YM477N9  
RGVAhI98q/oV2c22oDP/flmlKB8vl/k+Dx+yBdGzfQIZi/gYemhds40wCQZN  
e6YixfmYXFM3dFePBFUdnf2OS/iYP3TrlWsyCTIPtLUqS/ExTS0ymHeJBacl  
Wqp+L+WjVnOSnfQECdyKn197Lc1H+bUHnPzt7EDD4WnOLRk+9u+q0hu9YgeC  
Q9V0+ko+np8Yr9i0ggxvT1bGh8nycbyXLYQhwzcB7f9VykQ9qvdb3xl24NW  
Tuq4rCifXW5ezM1TclC6Y1uS5ZX4eLY1qEb4ugPMbRS8uUaNj4E+j7JKWh0h  
pNpLRE2HwJMoq/lN3AV+5amdU9fjY/FM5ralWS6QcXLOYJ0BHxsWjtzYsNYV  
GjA/SMuEj93PSpieam4Qqhw7o23Gx4kXx1bI5LvBvKATTdecjyr6bSVpK91B  
/+nUXQMrPi4ofTyx8Ys7NFx+6mwEfHxQpbbOxs8DQl0y3hkjH48EQ8HQTQ+Y  
D9932JTEEx+yQkiZrAU/ItLcR30DmY+nq3Ow8R08w0Fh+0dyBj27DDhKbUzyh  
aeFHM0snPv6T6letuOcj4R8rWza68HHzt4w+6f884e9zdqi1Gx8/jORtqPjq  
CdlFoXPgwUdLa32Dn4SeNqKbsdGLj8NuR+s15j2hZc9iNZIPH+P2lc5yxzwh  
wqX/gZ0fH5MmRR+nNXqCgPYdT3t/PnK0767dme0JOeKUDw4BfDSP/7DiAKFn  
Tca3HHfaykcxrY4Lv4Q8obVfd5lLEB+fZ15/GHCe0LM3BAtdt/FxcHnRrl41  
DxBgv7ZyD+Hjhe8/LrZlu0NOVHGHRygf6zNe7mbOuYgJZ8Jur3Ainr9fX463  
c4MX+t5/vSP46F+bMPYmyRV2L1XP8N3Nx6s9G/0/3nOB3PaWx/77+bhI/WI/  
bxEx39/J3xQQxUfpA6sVIjWdoIOX+3lLNB+9TH1qDtk5grCfwqrgWCL/Q88l  
Ju+2h31d+6LCTvCxLGZdnjjNFoTv2wjvTORjdMfSvpsMhLys5TkRSUS+iy+U  
mJSlgY6Ah/V7Uvi4UtPr1vDajbDflj1wH4WPP8WDSM/VLWChfNiX/TQ+DkzW  
64zrbYD8X2bUKAYf6z6GpH0tTMHyv8Vrop18lLtfEqAcZwydD/vvHGTzkSo4  
rm+60Aiicu84HeLwscsg+/6rcMQMS6D0x/L4KGJ/a2pe0wAuBW+Njcvgo86J

0NIdx/XBCvQWx2fycam51WC/pz50KQrIH80m6v/R59iD7foQ/e+16fEcPvIo  
5mUSSQawaKC4+UQuHx/avK3t8jOEqyXGIofz+LjfpU59gbYRkA4/gsh8Pm4V  
iKrYlMwMJxa33w4u4KNE9MLI4hoTkHu99fOmQ0T9aM6yMy+bQvmFYTWPIj7u  
YF8ZuEs3g2mTuSy4zse7bjv4e4PNgfXvVLvZTT5aWV3y/WRuAVpN4uL6pXxs  
dm3TXSNkCc8zzpDX3SHuH/+svOiBJYRvX5u4toyPf5u+6l8P3giCWsX3V5Xz  
8aLl6OaF0xsh75vRF6kKPjo3NZ9dFW0FGx9XaYIV8vHH0XOz7/qsoJvuEC5Q  
RfApK1Oz38IaDvu1nZ97xEehnUy/xQxrKf679c30Yz6mGM2vWthpDbdGh5a0  
PiHqb+LlIuWVAG5lkS7vn/LxmVCspoInwGjij9M99Xw81+8X9///I1CcTz1q  
f07k70T/VHk+gIqM+I/GRj765Sae6S4HeNyfYVDbTPSbzfkR/dUAQcWKeytb  
+WiYVhpKvw8wd6jofxVXeThVbxeVOQkZShKSeco83rvtax4vKVGiiMqUISVD  
Igoijc45t+QXSUqKaFKZUgmpJJFKmaUkoVCq73x/vs97zn72Xmvt/a59ofIF  
ra+iFcdy8wFI00+58jIHj4myu9v3A0gvrF564VU0iprd9JgyBXjxytb97Osc  
PJ55b7p6hAlh514cy+nKwfS4Z7UTyUxYGLzxYUY3Pb+DN15346H3MYOB+dR3  
Oajb0tKUG84A679hxok99LwSOCGQU2sBvU0/I2I+5qDHSdGwuWlz2J+TXBLW  
l4NfWu//OCFqDjJ+Qg0BAzKorbexMV7UD06oEbK+Q3T9k8/3HeczHfVTKzd4  
juRgu8rOGvmfxnAiTa/Z9gsd7+pBE5GnhqC57j43fM3Blb1WQhkVBtC00pZh  
/I3G17mopJXSB+4b3uUqU/R7caIprc9fF/b0HCAffudgm7vII3ddNRC/vPDF  
v/kcXDt3cLuNsgqURecIzv7NQTVUvvePP1ZTgk8ClhE/cBLadMurUCISAw+26  
t3p5CXTUlgHjw5Wg+N+98Tf8BOauVZb+Prwc6nbYqL0UJDDbU/57Z91S2Kz/  
3L9ZiMdbuUYD2u0SMDfvdfaBMIGRaqpTzaq0333S13FXhMATLV/DrmUsBoPs  
UJFKMQLHpM8PPAhYCG2bf9hfEScwrLLu1ecPfBCueiCIUJLAvYvPN7KEeEBo  
UvB+7IIC4wvybHvHueBSdfZ0tjSBrQ8lbtZp/2PaHJXVyZAhcH1WssxN6b9M  
ftGnx/xlCbzaY9VyPPcvs4mKGzKRIZCAbSv/Zy0XpMupsUQUCEwe/PzvuiI3

uBR35g2uInBYZ+1T4gkviOgcnr23mkAXzTu27xwEoe2WwfpTygSGdPkY3CkT  
hmxmf/kOVQLjpC2vXuNaAuseZy0CdQJnT5cx9itJgqSr5Q5JTQI3fV1xbaBx  
GXR2fG34rEVgJ1W85deXFXB6c57cAx0CzRaa+Hx1VoBNg07xHF0CO4ayXNoH  
FEE2b051uD7Nx4fsd535yvBh6pKejSEdf+ZxHTNWDQJ4+EYnTAicflcyOhap  
A0oZN2yemBF4eURVt/mJLgyLBxT8Z0F/f0bQXsNfH0IU67ycLAnkX7uzKqbM  
CKJYcY0X7Ai8stqT684ZBug3qyrGOxCo86d5XHArwLR75353JwLLI32enZJE  
2LfVwOiPK4G3Zn5qC/aywPxTX9YrNwIfbeg+JNhoBfMRWWmlawmcYk+2ny21  
huQDXy9s8KTz02f1tWS3LVgJ5P3T8iKQazyqZ87DDnhPOvnwbCSwgKWWIhl  
D41L5253byLwWe0JtffKe0g7d0n8+mYCDwddfHVFywGcVDbs0uJHYLNR2EE4  
6ADCZbwtm7fSelwzYFhywwGeG91QNgggcM5D6Mvnegc4WeOfsjCQwN/5fUU8  
VxzA3Vas52MQgTeWBgdM7XKg3W0t6e0dBARxCb5PF3eAjvXhxPFgAouaXGKS  
y+yBer9iliCUwLJunWY+R3s49/u1X3U0zZfS+/iqlvYmnroXnYMrC+qtiRh  
U1tQXGSwNHgvgUq5AZYTzTYwmN0XZbmPwNiLpxe7+thAsUzWM6l4AtcGql1b  
NWUNOwtBfSyBQHc1oc7BbGvQ0Ph6qGE/gXu+M9Moc2sYqzjbe/oAgXV1Dx8a  
f7aCa2Z0jIgUAj1zzqY9Pm8Fux7McmxTCRQMe9xp5W8Fuo6XplYcJrDakVVW  
pmYFk22ebpNHCORoiYounGXBtW/e0qY0ArP0pheVPWfB3t5K/vx0Au9LKMzn  
X2bR/ts/YM9xAncbJ2vlHmbBr2+itc4n/t+vDSvkt70gOrZ2uWIWgT1clEOF  
EwuY1rayCtkEft6dbCCvz4JakVY5OYLAKNP6wCx5Fli+9VglS9H8LPlqUirB  
gvqL3atlThOY2XB0cKkoC1hRW1WkcwmMFgnXjxWn/TVjRG1pHv1/1TexPXIs  
sBHcpSl5jsD61Np/twxY8PjVtLZ4AT1PDKI29XqwwC4/QVeskOYzPT8xN5EF  
TSHcBiJfTh5c+h6kV7DA0fiYkXAxfc94fthrkgUtC8RMhS4TeGHI39WXLK3A  
+RllNiFwMZKwVn5XCtoPb2SyX+VQJu6w747ua3BNbDIkreMQFv+xddV4qxp  
v6RpxX2dQJH04tMe89bg9rvChquSni+DJrE7Um2grdHU/u8NWu8XR4dNFttC

u6+dy687dP/L9e18o2IHXRn+GybrCDxkkJpSGeAA3l6fvCceEGgplrAbJhzg  
rWKEz/hDAk91zXbIjzrC+7uJWz8/ITB0uOp1+XEn8D3Ms+1TM62vk8SYjZgz  
fHBPDxp+SuCCQbWA+ZP00DvCCel/QeDMujLv/BQX8L8hF977ksBfL0zXRk26  
QH/SxYgPr+j87pZx9H1dYZuTVvT71wQWK8Tbuj9whUGpGzFvuwh8ebrIL3El  
G4L6zGLfdBN4JHCH+N1INgxfrY/rfEfrlVAU8b3Hhp377BM7egj8YGr8r3aO  
DaPWz5PaPxKYFMCdY6TjBiGiniltfQT2rRrZu8zLDcbevkt9PkBg4VEb7/u7  
3SC800BI6xCB+kXxg7GpbjAeNZrWMkKf00abLhx2gwhmZEBTKIF6Nt8ryTg3  
mBCcyWz8QvfDp+9uRX5uENWxP+vRVwKDjzi7qhi6wWQ+b07DN/pe2887ms5n  
d2gGWf+dzvfbMbmP19gwbSx+unaK5uudjutDdzbs4T6TW/2DwK08107t6XOF  
n8/k/7s3Q+D83sAzLlctfZMcX7VHM23/a0l+c0uMBuoXXj7N4Gqh/5deijv  
AvG6N4tu/qHfn347nSOBzvD7t/mlyn8Eqv3wiflclLEJw9Kri8gcZdBjjez  
g97nsx2ulvGQ+Ee4RvculyNwaWyouCJAImOdxshLW9o/e0fdLxQl0W+byasL  
WdZwpVe2N2kjie9XUZe4rliBe3ATr48EiTpVr8eH6+n9M16eLbGMxLT8uCy/  
dkuw4nka/U2axHQ+EVXuGSZ8ytjLeSpDonL/+NFYGQYY/vesN1W0xGWNCpmU  
vym8VY7j26pA4ojunQvyR40huUxJg6FIolW3UrBZuSGomLSxpZVINP3SppQ5  
og+tdQm7p5VJfj6zsiErSA+iHVRPt6mSmILtVcvX6IL0y/bqq+okXuzvWeKe  
pg01G5P60jRjPOQyEhjrqa1B/er8QdokhtXWh5Sc1wLh0NcarDUk6puFrB70  
0oLKqWS3lXokBlUPnNBepg3eiVoxc/okvrLXvnbAUaf+8r45/dqQRHfb105v  
dWugKDO1psKYxCRpjOIr1QWnpWv6M01JnO/vXKwdpweU6hFN0waj43tcT7bl  
GQDjup67IpC4DbRj8KcB9Jv2xPy1JDHZRzmqrc0QdjwMa29bk1iR43cDThpD  
R/vH/mxbEtU2VHNEQk0g3idDIMKexMZ93z7GGJuCwqCxlRmjiTklVyt9vptC  
Y1i/u6oziSc+TYk+PGsGYT8y9/C4knjX6PHMFSNzEE8yy/3IjIHilEKIRJ05  
VPEP1d53JzHvF9+OeRML8DuZNcDxINEzes94UIEF8EozBGPWk0iVhFd7zlrA

IYIRLfcNJBraWL3VsmOAu3rOWi1vEqOzFvbpnWDATAxsFdxE18vVqL32BQPO  
mX/OHfQh8ZdA/MpYQsbYPCTr6n1J/L1MbXGWKRM+07MG87aQePJC+8Y0PyZk  
dYwJxvmTaLAycatLHBOMfU9re24jMXBGJanpKBPeD1l76AWRmF/0WnQ0jQkH  
d33bu3gHiQGc90jcBCaozeSeHd1JorqVA08zHe/5Abv6xyEkRi1bIu+vx4QY  
wcnB82EkVh0bUXSbZIDMqf8WJu0iMXHR89ADBQyoX+6osymSRBPRJxs+mDNg  
e+G0h3E0icECr9G73gKENQtixWNofLf/OtK9xgIqbzjnje8hcXW+2RF2mj4  
M2bqW2Jp/a0mz15oMo0/jwqHiuNIzN4uqvT4mykUubKFUhNITCho3Zb/xwQm  
/C6uszhA4gK+r7Fuf43gWMq64dIjO6TtxLIfaUH+tM3y5LSSHRx+903tUUX  
3m9fGrs2ncTLNQ+9XhxcAzou3QIzmSS9v48XOe7QhK5a87bmkySaReSvVvFX  
h2S9vNN5p0hcv8V6UUCAKrQv3aJuRZJYr8tT0JWyGhK01X+X5JDIJxghnnJh  
FSjNr7o3cppEm29vJ9qL5SG2b9ApM4/Wm9ShddeapUFhvZ3E1nMkvnFqi6Fy  
pKCl8dI7/QISW46kZFcfFYfdZguL+ApJtN4g6J63ThRkr4aEvblA4nSS5lsH  
XiF4LNdqWHqRxjiRXFltbT7YdUr7z/5LJI7d97WM6OSCZbwnH7uXkDjr/rMj  
ROwXs37vRObqUhj3Vvk5nOJNTzODRtRt+XiVRevTYyBnOGFN88w255jISxT5+  
rtqbNsisfi45cvY6ifh5rfdxiw/MINbe8l2VJEY+fNDAmnjDFLnZFcU6SaLu  
Bb/vENnNrFIxQ8nbJPZ+81e6Nf+R6X8mV3DkDonXU7ifh4QOM4WE59vu3qX7  
z11h+7ToBPNGku+Z4/dJVOI+RBmf+8nc/L3Wf0sNibzl5g5NE3+ZfIEKGvp1  
JB73Khn6lcELZZ0pk7wPSLTT/nqHL1slvBwH7nU1kBjKvc/fs1kMuKptUq88  
lIH78OZlgk8loUSn2Hl/I13/zUtLdDyWg8d5AUn3Jnr+tdzcGBUgB78lgt8r  
ttD4BQn2i46sgqIjLUU/nplomKD+tlqKCWZCM430vqD1nRYTVHhZAWo+jP8J  
f0lik9vtVUoPtcFprXsjvijx/47MOaU4XcgzlvAa7qTxfIjUfjQAHDDBmX16  
H0h82zCdfv6qOYzu/oW8vSR+MrDvkdNngOxhn4VdfSQ6nd90/DIDYPCpXG7i  
ElkvFcYlKz4jZEJygnSjbd06IYtL1lgXNGnoThKYmphx6am01ZwjCq6/2SM



1kvxLP5OsaH3Yf5DueN0v2jMhfUE2sL7hB0u4RMk3jC8zi1oYgeHx5skcZJE  
YzvYumHIDnT8NXrEp0mMf7kn72aEPXS9yrg49IOup3PDHcVOe0i2+xpeNUMi  
y7PveoG0A6jfZRtnzJH4yFXqmI6JA7RrXv/r+5vGq37SslXPacz7R809/9B8  
TiTYufE4wIXTq3s8/pH4X4yrXsEVexB283VxXUBhOPc/yadgDzF8nPv2PBTy  
yWjK2b+0g/f32zSs+Chcc/+li2SAHdhEC+UyBCgcG5os0P9uC1If9+/TW0Rh  
b1fR3QAhW0gi74xoLqZwWb5RUgxA8PO3zeoiFK4YgJ3dsnaAjts1FhCYWx  
i8OulRZbw+2qQKMVEhQOeRTm7TKzBrmIc0VSUhQaBX++vPu1FRxVfiMhtoxC  
prtN+714K5h4tyRVaDmFeoLXpW3UrcA723mSdwWFhqe0E0X7aP/rcNj/nyyF  
Ml+q52ULWaD+r7ZtTo7CFim/3LAWfMTfmrWcVqBQt/xMoq8l7b9D9cvHFSk8  
rHJ03nkpCwIUw+RGlSi84sZQbZlAaHlzMXNAhcK07Pdrkl4g6J/80N+jRqGA  
18hroRsIZ22Xh73RoJcX7/EtiTwE3nmPd+1aF07j/RDKyEAIqzzu9EyHwrU1  
uYRaCkLHzsa7T3QpDOVsa01IQmDlc6k36FNY9qugvDsVoei12elqQwq53e6/  
HTqFsPj4boE7xhT6zct8ti5B2Gt1bW+FKYXFIWrxnBaED7PDQ6XmdL4LXFQP  
/USwK1fwLGZQuEV9PPOaNgvKgzY9KgAKOxxjne5EskBaljA4ixR2tbjN2dD+  
Jrn9WSFpRaGCZK/xL1kr+JQmIJ5lQ2F1ZlZ+/FHaD1myUtLtKMzOb34RzGUN  
q67e3HLAiUI5ob1VAkI2kB4w/jzOhUIRi6mgX9k2MCmtBjFsCsu9ar5MrLSF  
hsNnZYM9aP6EcpNqaL0HbjnY7bGjwj9Oq24XhDpAq1S1g+tmCuFlhUzSDwcv  
av1xx96PwhNIHusF9jsCv1kwxQig8Kqiqu33g06w61shn0kgzTeR8duCyxm6  
Lr6P0dtOoZZ4wGH+OGe4LO6+TiWEwg8jjUu+bXIBseZjDQphFK6TOSIx0+AC  
cQce6q3YRWHrgZM3rJRcod/oT4FUJIU6S8SJlP2u4DRmLCYWTetL00Jd9zNX  
qCyMPCAUQ+GqVg0slmSDzMYr47x76fqvNu9jrWXDQdFB33+xFNoltFnwp7Lh  
y+OVz+biKHxo2mDpVsKGfWajfu0JFCq17bq0ooEN/Nefruyn8I9rh0K7S/Y  
kKNglpJ6gNaLssvWsZdsUCA44ptTKOS/piMz+IQNZQI/Lxim0v2V3MFtUMEG

i4T1RosPU/iNST33yGRD03hl49ARCmeTW/VqfNiwiWCJd20ahZeGX/R+WcGG  
gdcRo1Q6haLCcye96XoiHZ/HRxyncCCzYCoXwhX+VmsJO5ygsEJQvr59gStk  
6Gb8p5BF4YPlz0pepbqAdNGoztwpCkt9eYLmpp2heJlD/cscul8jZYpr1jtD  
/V/egYMcChnoEiL93RHY0dtifM5QKFsyL9tt6Ajvhh7wGZ6lsDB51J0d7QA/  
W5PUhs7R84MwUtB+bweaZ2fD7YsprBPjWVq9zxqqRLz+yV+m00myvbkUxwrs  
Dt7Kmi2hcOuAdEZJQu2BkffKLlG4e8GYeGhJkugTMZmF92i8wtW9PwDZwpK  
pU7pg7cpLHLfP2dyyRgq5EpW1FTRehk7bFvZaQiQLXC�vEdhW5PIBa+FBtDK  
tx12VVP4Nk314C5fPdgY9+iFXS2Fgc0h6u9+rIHhMUV/+Xq6PxZ/NJB+pA0x  
W1MmZx7Q8+N96WpCWQsWdHxMbXtloZfpy1m2jCacsAepkscUZiq43XAo1ADZ  
+3nFKU8oFCKV16XUaNDv32+TTc0UXifXv5kN1QTjwo3N+k8p7NTsW3L1mhY8  
kqratOgZhbsWde0VM9eBtceWjg08p/HprtRe17oGwiJfiZDtFM4pnmgyS9GD  
uQG9gvA0CpO+d5xTW6cPR7yy9Ow6KXx2R+Qcv5oBnAfx9TPdNJ5aPsuy3tL+  
u7J06MU7Or7n64MKVUZQrSwUe7mHwqPrQ3iMMo3B8cxOwZSPFE71kHvWeJhA  
p/CTMxv7KFSb9OoWFTCFwGRITf0BChNOXdfpLDWF710p1UJDFJrez99zEM0g  
aUe/68AwhbURymWSj81A+B1+vP+JQrty1pvjZuZwhp0fSXym52Hc9NTn/8xB  
peHPgvAxCsX2h0vsnDSHm0abc2zH6fjBfxa6gAWwSu4pyU3QfLyrl/A+ZAFV  
+QJXtScpnNlYG7q5xQJ0qfUGzGl6nnpn0HPThZ8Cl4+fvufykkCeyMXXAmAFy  
qeOszbMUtv9RPHNwEwPIOlvm0F80Xu/Pfm2MYIBwZJp7wjyFlgJvS2EPA1K3  
v+5K/0shO+7I39hgBvzarLgll4uDg9pOYgucGRC1LmK4hJuD5grPF+2UZsAn  
x+rwu7wcPOp8f4VFmwVswYU/mvg5yF96L0Qwygl6jTckvhHk4LjZntV+c+bg  
qn2B55MQB+OncijbdpjDo9UT6TPCH0xtr0t8d88MLGSY4gKiHNz06ny0PL3v  
VIqln1m6hIOKE/2JSgtNQV2gS0FFgoPeFgIPeblNoODP6stGUhxMgQm16i9G  
cOJzze31yznYdc5hdP81Awh99P1V9ioOukU947JZrgP998CncDUHh30P2s8/

0YRNFRn9FcocdC+PmLdJUAeHc8rf29Q5OGsa92jDnBLUEdH7ejU5uNfR21+g  
WRGMM+r+fdPm4MXoHweWXVIApX0bRUT1OXg79WOpk+5yOLurmJQzpPM5KK8j  
tVUKxIOmZHWMOagvPfkWUb8EjvlgEdOUg2zGZKxHqTBweWRquppzMHXfrkn  
F36IdXhbuZnBQRk+6anlCVwwDqrmYcDBNpOl04uP/2RuN4p5kIAcbNr+Mu1n  
/2dmj+YDhwrrDtYv5hl0nulkrlcUacu14SBXwzLxqcH/alqlfbyu2NHnvqDi  
o74dNdailz/cdeCg9HH9+GTJ3pp7fD+Cmp3o+DI9juVR/TV686yvb1w4aLoq  
+e/5ZX01lydPxHxic1DXof3y+vKuGvnRd79n30l4qG3ZJn2zhvqoliqwjoNZ  
eXGe8eqdzMWde4SWedLx7+kePSb3lXmoteGuihcHI52Jy4mDc8zfDaLLjTdy  
cPKO1I2yNh6Ivru5wNaHg0sOrRDNH18Eo+Ulqp6+HNwtWZTYUyoOW4t/lgVu  
4WCRos2CrkXS0JVnbRzjT8ebaKlYySsH7JysmtRtHHSJu/nsk5IiPD7WY5MT  
ROtLW057Z7AyMJI1Wgt3cNCvy3P1XKsaalQ/evsGLINXl84f4hpZA+e3LQl4  
GU7zeXpnkWqrHkhv8hvtjeAgX7GChm65AWS5l0ZORHGw8nXdqNtZIxCwn535  
t5uDsk+2zDF0msD/ADZdK0A=

"}}},

{RGBColor[0.880722, 0.611041, 0.142051], AbsoluteThickness[1.6], Opacity[1.],  
LineBox[CompressedData["

1:eJwVIHk41AsXxyWyFTfJlu1KizWkMIP5DqOolyTcNIPsZR/LzPysRRklkW3S  
LaRoIaWutVJuXLqtekOKqGTNWCpr6Z33j/Oc5/PPec73e5bffcKd/YWFhIRK  
BfH/bPG1a4opI0QR0m7xfj7kQenL/HzrC6uX0t4yweVmkJDUphpVwRqnfBkb  
bSigtgfb2DHlOIMZbTlubvJDWe8GDB3OcX6SfEX3QW+xn6k3269tSZIGLWL  
+89+J3vgZmSk6QFFWDvypSYWuaN2elWWjxrFVIX7dq0/+GPDPf6z5ezf4NJ  
M4006BClonrpa1JBshh/bHaRonUYVUp+IZFUOXcf1r482xOER0T9lm5FeXwa  
rXLt4ISgo1v6K2VSAf+420Y1LIRiyNyvppqxVCfmfhd9M+4ZDakHaMpqlioIv  
tb0W8xFQOeAn9M5BHeSXJlMOGUwo9PZ8KM7WgHhF3okehUhoZHBtXBJ/h/PK

CznJBZHQtjQuFQvShN95I7yQjYLxeM+Ku67rYVCeO2F/LArkC9xDYVQtOOwe  
zYvgr8HhZ49uh+JGLFJkt+dURsPtBjcjTWQTKv7amhsgGgMvD+MJ8uQmsEcX  
D+a4xeDQql6niXebwd/D9WCVxIB5n3u7pFUbHg036n1HYhAbaizndkcH8rrT  
RhW6LKSo9sZIFOnCN4xWdO4wC3kjxuYRLH3UUcqKE7pZKNTvPbfexwAPnx1I  
mpJio6yX+6PTYQtWLMa4SpHZelNDaUuLiiFoaQp+QoFs9BTy+wqzDfEmq1xY  
JluN/plHWRxxl4S5+Ubb1rDx2bGA6pxohCD/18ZT3Wzwl2wuiQYZI3sl2UdP  
mYNpNyWXvj5j6Dy4XiZmysFsJV+k3nUrJDHRNbCXgx8rmquzn2wFr9yeNxDE  
gZBXQUAI1QR33h1v1ErmQKQ2TGFHrQkK9vw818TjQEKG1qauvw0Rmg8edpRz  
IPuAr/1fxe0YMZEVa3nBgbxC89uK09vhNb9c7VkfB+vCC9JTRUyx19HoVhmf  
A43WMIuDsaZ49kv5nN8PDrTUaePmk6Ygl37qVZQgsJmtVLgmwAyKm4Rpr+UI  
6L/g046/M4PchKZvmTqB7UkFt4pbzWGt2a722JgAqSvMO9aSBepjQoQJmQBl  
C03W5Q4Jji9nxL9YE6BxlR7pa5MxRP2HsWhPwK6PHyVWRMadymaRUCcC/zFt  
1vogZ4EK8texXW4E9mYWdDSctIDP5fyjhXQCbkNhqblClpgfHPKMOEjgAIVm  
GsayRFbF1Z42PwIGXJ1CoxlL3Lj9JWvpEAHhF7+Jfo+XgphsfkNtCIFO+dng  
uu9WuBDAbvsRTqDcs/dVXAwFCyc21XdEEjhS9sic8p0CW401w/YxBHRmXZyO  
kgDvIX/Lg2wCcuvalvvGAv9062xQJwgsWZFraQ3A+2+n8k/FEhj2qQzauAAc  
zkjXq4wj8Cr1dzVxEhUvcV76RDyBe9dz20clKuaED2loJhC48lzs+JN6Ktj3  
InclCDh70tbsxjwVS3rt0cUCjpfmj502t0b68IbODAEHkLyLIghrnHI0umkv  
YcFP18709dbokm927xLUJyXvXGEyb420wcyVJAFrlTXUrzW3ATI6q6IF/Uj/  
qx86y7FB4u6p1ScF/c6PF2t019lAvsGmNl6gZ2C13OuGORuQ2u9I7OEQeL6N  
yz1vRsP94LtYltBfkhDK96qj4clv9TslaAKnLvZfpM7RkGIcsC9J4B+rZZ/r  
ejNbvBvLS34eQWD3KtK9wVpb7GUu6m0Jjfdt/IqTobU7MCC730jdn8D7h4Tl  
ntkd60vK9ZzldA28GXS0HQnUuNqOx8K5ntB779/fKvZibLL3hpbGQR23Cva

EFdjh+OTmSElZgTOvjNrSqvehcspfHFDKwJk5eC5S3cc8THVfEumLIHmjzGT  
9h00cMvsfPtNRrBf5UeGj3T2AGveX3BfRcDTIv8NuWQPgm5n12qIE6DePNhz  
2M4JYxq+Mld+cuDXnn5vmeleXBdLGy4a5uD62o/xRnL7MF1KfhDfyMH2wtM/  
s567oT+oMveq4F5T72Z2vlf1BLmt3tvuMRujo3vEB0R94cwrTBxTY2OB+oqv  
Uh8Ai6WIo6RjLJxU6Dl+6W4Qal6dbtrwIQbbvtanMcvDoJiuWsy1jYH/yhOj  
TbpMJFi3utrWRSPi/dwwUzsKuTWhTeT10Qjv2LCSJviTJT2hxlC/oxD/wuJz  
fRcLL3TE5C8rR+FxGi+/s50DjtAqKf3sSEgG3gxZez0WHyv0vHfKRyJdRGrd  
4rV4JBZqxhXIMKFc6pR0rDgRDkHx0VPyTDhWa4ucJR3Bk4fX1tLI3Bz9qlJ  
k9lRvFJZN+NuEIGTT5+zFzckY+KvlRLPUsIhenR6o8SmFLgG/QzWLwqDmKIU  
1aH1x6A6wrIUbQlFSIKyQ7f0cWQsDAYvLIWg6Mo6N1XpVJh+zXuz2iAE23zW  
MCN/pOKAjUisS0QwnNWEApUGudi/ptdNW+CTTIP045xPaXhLv3RhcPEwdgzH  
Waq/PIEOZbUJS8fDUJ2RVEt8eRJGjcHNWrxDiBPN7DZ4mo7+IQ/HkOFA7LvC  
vDJZcwrVCLWHR+0D8WQz68Px6gy49rwuiC8JQKNft77epd04b2f+LEUyAKbO  
Rq5apzLR/8iqMZDwx9VLrt/YtCwoC4+76/T7IXKlujOglQtjHncPS7n6YeU6  
ipMV6Qwa6g7s2/u3Lz7xgj8WVp3B97Q4ppSlLxLzZH2ubsyGE7Nr45P7Phhj  
/pf3Z2k2RgK2XY019cGZ+io3BZUcmG6ucjl23xsS/deexJ/Pwa8PpMVpC2/B  
/1QxSFfORcrlZSq0vw/iHrtRSTMrF4Zb1u8ddD4Ikf3MuyUyeQiK35XX3uCF  
E0f3DZan5qH6h2baoc+eeKV7a8ljMQ8a6ctkLyl5YqxF9dk8kQ9aiS41wdoD  
1GsNWmqT+TjrbxW3MYmBuiKxCv3pfbgGP/3yOI4Bw3yXrZbf8vH2Bv9RKlCb  
tRQ+ITGXj3VV1SU1TAYWGJpe54R42KZWo+HgX8Dt304WyK/mQVyyeXWGPQNa  
HHdpGWMeku/zovbLMfBnWFmemgkPjZd3J4qvZkDW/6uKwXYetEgrxutWMSDk  
nKHrQOLh7bzXjLIYA726TXbp1jyISPrWfpqnI79vc4rYPh6q93sNc/voWNUZ  
I6ngykPyWiEDqx46jj39+8zGP3gY0TPW+e0NHZH1jGJbuqDexShn31d000Zk

3U/x5SE89hef1kJHy4leWo4/D5KsSoelJjosjug8LQnkwVB1t0xdIx06oc1v  
m4J5mKtUu6tXR8dF39U+7aE8LCdZlQ79RYfiAc+R/nAemFUq0yVVdGQ5lUdM  
Mnml8a+86FlJh9jOudlfUTzYlQ3dUS6n438P2LKs

"}},

{RGBColor[0.560181, 0.691569, 0.194885], AbsoluteThickness[1.6], Opacity[1.],  
LineBox[CompressedData["

1:eJwVxWs8lIkCB+DZdhCVS6w7XVyKQRniCM1/cok20hSV22ilziBGDKLcDYZ5  
RbwpjVlOylZLRA3RImk3RbWxWqjSq1oSlaU653x4fs8aThTr4BIKhRL7P//f  
YWbgPU+JwqD89GeFrg2TMUK8rPuHP8yoJllKXpX6SLmjd+QSf4IRYpXClW8x  
hyBkzPW95hzj9VbZR/bVm9A7Zrcnn/+FQV28ESCud4CwvrtOlbsE+3r7Tr2V  
ZaI2Jsb2maYsCHMzqmjICfPT3c7J/BW4UfzQdfcKdxTsl778T5EypG1vvxNF  
/ogKqWLNmu5KlF6ta4y/6IHORomGQU111LiZfR895oXHg4ozjCkNBER/6zbs  
34W/7UKaqrU1MLs+7aykmYVlnxQdY/l6aB3a1ktn74GubwjL49V0HjTmdOz  
2hsaw0PPJEWrEWITt36T2+YONLPyXHXgh3lQ8ya7gV9Yki2xdsALNuuHYnd  
e2F/VnDoMNMQ264oT6723wePL000x5rGuFXkbnG/aj98LgsKcqr8KjBeVfz  
u/1gB9Df2U+tw9BlgUnpv33BaxXUV3abwEnTYEyyww9HI+lqPg2maBl97pPa  
5IcMveE4+QoaOAH3jjTo+KPkGN0umm+OB1WGsQ6D/hCbD5824FhAkhkn1qYH  
oHpYsNjvsQG+TXmCQEEAhsSTI+KijWi0HyEX1gVidK6zMGgpJfQ7bu5sPhKI  
l55lTNZxS6QZTM/X3wjE5FenKhkuHZ2Z1jmLrmxM+2jtGRmhl/eTm1icw8b8  
L5NUqbcVEgaCF7TvsEFhl4VGMK2xY+iypGR1EFbenDR5pGkD0f8VbXFEENQ1  
bj25JLLBOaFKi29NEHSiyoTZVFs09i2f09MRBMNVzhN2U7Y4JnFU85sJgk1K  
WZ2k2w4ZP7RY3fi8AF+Gs+1hviNyeTFuB2YOWEjgKracc0Scl1f8tqUcLOIV  
lpmN24Lye8eejOtycDFw+GFSHANM9W/KUS4cfN1if825GRCzYovnijnwCvyD

xZJuxc7IFyLSJBgfymXzIq+5QoEasUbPOQT22uEfqxo8ER6pJasSFAobsehL  
4X0fVGu/HZ2nc5HdQvQ/1QvELncTM9XBSLx5s3PpmEww2GciJoSD0fjEfDip  
Kw0F90P8WuuyGORpDGVVtXAhTqPVGvBisWlGms07eBjtZSKjo1Z8HFye+6ad  
xsOS2TC6U088op9+HOeZMHMrBeKOKCkRUY+NljvLxIEx00CC750Q30vwUjrA  
R6KRkQkzMRm/5ZCl/Q8SwJ0822RKPQ6FsNqIH34+ivqK2ycbuSkQUpfpfK5J  
hv7Oss6wmFRon/NKyZQcx11LBd1e4zR4NppQT210Ra2q/pr839NQ099j3f6v  
NFjOrGvzjU9HXs/9+M9G6XB57nbjVS0DMmnTxvLrMlAk0JBzWZoB0dtlVw4Z  
ZGLrY0t42t5MZKSkewwqZmHU7Nfnd15louK8jo+eYjbq2l6y/zmWhU0cVV7M  
YjbMJaoXLOWywdKnhGm9EoCfuCPJKS8bSs2KvxW/yIF3+HhMpZoAruNjJqv6  
ckEhPaNdigTQm1PQP96XB+HS85dvqOcgSYYYtOgRgn9But2wJAe7z/POTzXl  
w/Lahtujcrm4u57/LKuxANwgc+Z0ai7aHAbNzapEWBp6rHJsMhe2LEtVw3wC  
M941KqN783ChyvtDvHMhAnyV3Vpv5yHmb+a200ZCdM0GFgTThFiuw/DasvkE  
FI++y8orEeIFGf5cfOUEHiZ0XJ+dFeJ4yUrOBeMiqD14I5Fh5eN1+u/kmXNF  
WNMT1WTZkl8T0is+GrrFsC8vVzm8rADyozV3k8uLlf8q+xHvUAGcBboWQu2T  
+NJErbdqL8CN+DattYUnoVF9VdylIgJ1H6+IUqkE+QE9N7tCRchN2/3qYnYJ  
HMKNOB8bRHhIq/sa8LkEEyu/O/TLFxHedundW0gsRSTVZSLtRwLMmmZD/als  
qG43VqMVEbheIXffLoUnd0KbE4xgY2le6wcP5Qi9vzGrLKTBPQzJpn+H0vR  
XO4dLEcS+OS/ln2aQmLDfTls2RkC9cp5ZeoqJLZ3nzopOkfAMGG/ohKdhIJY  
t+LedQJnDleX6FuTeN3n50dpJrDy4IyuhQ2J09YRM/QWAhRWAc1jM4kwqco1  
spXAMK3dTbiVBC1hLJ/dQaB0ZH2G3G4S3KdB/PG7BFb0xyloeJPQuV77XvMe  
gcyejhPGe0k4taq6u98nECP117j4kSD2meXX9BHwLC5szQgmEXRVPeTQYwJd  
ucPOxQdJlCRk/Ur2E3BINE2pDCNhp0ZbuD1AwDTy1pP2cBKjzbRvhk8I/BSs  
wnkQSSJiM9Gz+y8Cmr6Br0ejSCQc3cxPHyJQ6HUxeopHwq3RcrFumIDcto/z

346QWGWUGDjylMB/AW5WTIw=

"]]]]},

AspectRatio->0.6180339887498948,

Axes->{True, True},

AxesLabel->{None, None},

AxesOrigin->{0, 0},

DisplayFunction->Identity,

Frame->{{False, False}, {False, False}},

FrameLabel->{{None, None}, {None, None}},

FrameTicks->{{Automatic, Automatic}, {Automatic, Automatic}},

GridLines->{None, None},

GridLinesStyle->Directive[GrayLevel[0.5, 0.4]],

Method->{},

PlotRange->{{0, 1650.0258}, {0, 1142.852117}},

PlotRangeClipping->True,

PlotRangePadding->{{Scaled[0.02], Scaled[0.02]}, {Scaled[0.02], Scaled[0.05]}},

Ticks->{Automatic, Automatic}}\)\ \!\(\\*

GraphicsBox[{{},

{RGBColor[0.368417, 0.506779, 0.709798], PointSize[0.6], AbsoluteThickness[1.6],  
EdgeForm[{GrayLevel[0], Opacity[0.3]}],

{RGBColor[0.368417, 0.506779, 0.709798], PointSize[0.6], AbsoluteThickness[1.6],  
EdgeForm[{GrayLevel[0], Opacity[0.3]}], PointBox[NCache[{Scaled[{Rational[1, 2],  
Rational[1, 2]}]}, {Scaled[{0.5, 0.5}]}]}]}],

AspectRatio->Full,

BaselinePosition->(Scaled[0.1] -> Baseline),



ImagePadding->Automatic,

ImageSize->{10, 10},

PlotRangePadding->None]) blood

\\(\\*

GraphicsBox[{{},

{RGBColor[0.880722, 0.611041, 0.142051], PointSize[0.6], AbsoluteThickness[1.6],  
EdgeForm[{GrayLevel[0], Opacity[0.3]}]},

{RGBColor[0.880722, 0.611041, 0.142051], PointSize[0.6], AbsoluteThickness[1.6],  
EdgeForm[{GrayLevel[0], Opacity[0.3]}], PointBox[NCache[{Scaled[{Rational[1, 2],  
Rational[1, 2]}]}, {Scaled[{0.5, 0.5}]}]}]}],

AspectRatio->Full,

BaselinePosition->(Scaled[0.1] -> Baseline),

ImagePadding->Automatic,

ImageSize->{10, 10},

PlotRangePadding->None]) liver

\\(\\*

GraphicsBox[{{},

{RGBColor[0.560181, 0.691569, 0.194885], PointSize[0.6], AbsoluteThickness[1.6],  
EdgeForm[{GrayLevel[0], Opacity[0.3]}]},

{RGBColor[0.560181, 0.691569, 0.194885], PointSize[0.6], AbsoluteThickness[1.6],  
EdgeForm[{GrayLevel[0], Opacity[0.3]}], PointBox[NCache[{Scaled[{Rational[1, 2],  
Rational[1, 2]}]}, {Scaled[{0.5, 0.5}]}]}]}],

AspectRatio->Full,

BaselinePosition->(Scaled[0.1] -> Baseline),

ImagePadding->Automatic,

ImageSize->{10, 10},

PlotRangePadding->None]\) gi

```
(*-----  
-----  
-----next mouse*)
```

```
vn=readTac["C:\\Users\\exx\\Downloads\\TbAM6, Liver2.49425, GI 1.128, ID  
2479.csv"];
```

```
Lv=2.49425;
```

```
Gv=1.128;
```

```
id=2479;
```

```
vn[[1]][[1]]
```

```
{{10,129.52},{30,325.},{50,155.646},{70,112.409},{90,92.7613},{110,81.1665},{130,  
71.8167},{150,66.9835},{170,60.0974},{190,53.9549},{210,51.9155},{230,44.8522},  
{250,45.5952},{270,40.9275},{290,38.9753},{330,35.1263},{390,29.3877},{450,25.2  
248},{510,23.7102},{570,21.3757},{750,19.1914},{1050,18.2629},{1350,17.8997},{  
1650.01,14.3647}}
```

```
model= mouseModel[Lv,Gv,id,30]
```

```
ParametricFunction[!\(\(*
```

```
GraphicsBox[RasterBox[{{179, 179, 179, 179, 179, 179, 179, 179, 179, 179, 179,  
179}, {179, 180, 180, 180, 179, 179, 179, 179, 179, 179, 179, 179}, {179, 179, 180,  
179, 179, 248, 248, 178, 179, 179, 179, 179}, {179, 179, 180, 179, 179, 253, 248,  
179, 179, 179, 179, 179}, {179, 179, 179, 179, 179, 248, 248, 179, 179, 179, 179,  
179}, {179, 179, 248, 248, 248, 248, 248, 248, 248, 179, 179}, {179, 179, 248,  
248, 248, 248, 248, 248, 248, 179, 179}, {179, 179, 179, 179, 179, 248, 248,
```

179, 179, 179, 179, 179}}, {179, 180, 179, 179, 179, 252, 248, 179, 178, 179, 180, 179}}, {179, 180, 180, 179, 179, 248, 248, 179, 180, 180, 180, 179}}, {179, 179, 179, 179, 179, 179, 179, 179, 179, 179, 179}}, {179, 179, 179, 179, 179, 179, 179, 179, 179, 179, 179}}, {{0, 0}, {12, 12}}, {0, 255},

ColorFunction->GrayLevel],

BaselinePosition->Bottom,

ImageSize->{12, 12},

PlotRange->{{0, 12}, {0, 12}}] \) \(\(\*

GraphicsBox[{{}, {}],

{GrayLevel[0.55], AbsoluteThickness[1.5], Opacity[1.],  
LineBox[{{9.09090909090909\*^-8, 9.090909090884856\*^-8},  
{0.0874367476365131, 0.08197166587636243}, {0.18222810297558026`,  
0.1358255024317191}, {0.27073779576926765`, 0.13315455086535802`},  
{0.3575112797365835, 0.08143316377978886}, {0.4516394623155443, -  
0.007347854733426912}, {0.5394859823491253, -0.08816932746972758},  
{0.6346872009943513, -0.13787329990112937`}, {0.7281522108132057, -  
0.12816574147938434`}, {0.8153355580866803, -0.07001063326902106},  
{0.9098736039718, 0.02121659675083076}, {0.9999999090909091,  
0.10024804094746914`}}}],

{GrayLevel[0.55], AbsoluteThickness[1.5], Opacity[1.],  
LineBox[{{9.09090909090909\*^-8, 9.090909090880112\*^-8},  
{0.0874367476365131, 0.08090369567458766}, {0.18222810297558026`,  
0.12746559200130417`}, {0.27073779576926765`, 0.1116266937044405},  
{0.3575112797365835, 0.046963725126600256`}, {0.4516394623155443, -  
0.04509050859182233}, {0.5394859823491253, -0.11115559892361665`},  
{0.6346872009943513, -0.12642564594664163`}, {0.7281522108132057, -  
0.07740196037964171}, {0.8153355580866803, 0.004179083230780074},  
{0.9098736039718, 0.08937493944143977}, {0.9999999090909091,  
0.12834702174618903`}}}],

{GrayLevel[0.55], AbsoluteThickness[1.5], Opacity[1.],  
LineBox[{{9.09090909090909\*^-8, 9.090909090875369\*^-8},  
{0.0874367476365131, 0.07984396759533968}, {0.18222810297558026`,  
0.11939549826670079`}, {0.27073779576926765`, 0.09184904274707059},  
{0.3575112797365835, 0.017913117173780694`}, {0.4516394623155443, -  
0.07109962300031061}, {0.5394859823491253, -0.11717052830989395`},  
{0.6346872009943513, -0.09879571259704382}, {0.7281522108132057, -  
0.022693471356141894`}, {0.8153355580866803, 0.06128703302641453},

{0.9098736039718, 0.11605625481609519`}, {0.9999999090909091, 0.10415981267620744`}}},

{GrayLevel[0.55], AbsoluteThickness[1.5], Opacity[1.],  
LineBox[{{9.09090909090909\*^-8, 9.090909090870287\*^-8},  
{0.0874367476365131, 0.07879243663407876}, {0.18222810297558026`,  
0.1116081822210312}, {0.27073779576926765`, 0.07372482040530459},  
{0.3575112797365835, -0.006267252216927747}, {0.4516394623155443, -  
0.08743897872291118}, {0.5394859823491253, -0.11109134853087661`},  
{0.6346872009943513, -0.06371549528296311}, {0.7281522108132057,  
0.02544576624054603}, {0.8153355580866803, 0.09464282937855747},  
{0.9098736039718, 0.10731931496853601`}, {0.9999999090909091,  
0.0516787429232188}}}],

{GrayLevel[0.55], AbsoluteThickness[1.5], Opacity[1.],  
LineBox[{{9.09090909090909\*^-8, 9.090909090865543\*^-8},  
{0.0874367476365131, 0.07774905743802465}, {0.18222810297558026`,  
0.10409673959866513`}, {0.27073779576926765`, 0.05716133039337165},  
{0.3575112797365835, -0.026084496726167965`}, {0.4516394623155443, -  
0.09591154799603378}, {0.5394859823491253, -0.09685594593277226},  
{0.6346872009943513, -0.02730376120671303}, {0.7281522108132057,  
0.061646715198529656`}, {0.8153355580866803, 0.1046634148537508},  
{0.9098736039718, 0.07509702498429204}, {0.9999999090909091, -  
0.006536873471333553}}}],

{GrayLevel[0.55], AbsoluteThickness[1.5], Opacity[1.],  
LineBox[{{9.09090909090909\*^-8, 9.0909090908608\*^-8},  
{0.0874367476365131, 0.07671378556951527}, {0.18222810297558026`,  
0.09685439581479163}, {0.27073779576926765`, 0.042069810325321415`},  
{0.3575112797365835, -0.042006785469922474`}, {0.4516394623155443, -  
0.09808544986431629}, {0.5394859823491253, -0.07760167026270944},  
{0.6346872009943513, 0.0063643674428021085`}, {0.7281522108132057,  
0.08405712128907425}, {0.8153355580866803, 0.09555213349985489},  
{0.9098736039718, 0.03202960165577907}, {0.9999999090909091, -  
0.054402034659985464`}}}],

AspectRatio->1,

Axes->{False, False},

AxesLabel->{None, None},

AxesOrigin->{0, 0},

Background->GrayLevel[0.93],

```

BaseStyle->{FontFamily -> "Arial"},
DisplayFunction->Identity,
Frame->{{True, True}, {True, True}},
FrameLabel->{{None, None}, {None, None}},
FrameStyle->Directive[Thickness[Tiny], GrayLevel[0.7]],
FrameTicks->{{None, None}, {None, None}},
GridLines->{None, None},
GridLinesStyle->Directive[GrayLevel[0.5, 0.4]],
ImageSize->{Automatic, 28.4375},
LabelStyle->{FontFamily -> "Arial"},
Method->{"ScalingFunctions" -> None},
PlotRange->{All, All},
PlotRangeClipping->True,
PlotRangePadding->{Automatic, Automatic},
Ticks->{Automatic, Automatic}] \) Expression: {Bl,Li,G}
Parameters: {k1,k2,k3,k4,k5,k6}

```

]

```

Manipulate[Show[ListPlot[vn[[1]],PlotRange->Full,PlotLegends-
->{"blood","liver","gi"}],Plot[Through[model[k1,k2,k3,k4,k5,k6][t]],{t,0,1500},PlotRa
nge->Full,PlotLegends-
->{"Blood","Liver","Gi"}]],{k1,0.001`0.2`},{k2,0.0001`0.1`},{k3,1.`*^-
6,0.01`},{k4,0.001`0.2`},{k5,0.0001`0.01`},{k6,0.0001,0.01}]

```

```

Manipulate[Show[ListPlot[vn[[1]], PlotRange -> Full,
  PlotLegends -> {"blood", "liver", "gi"}],
  Plot[Through[model[k1, k2, k3, k4, k5, k6][t]], {t, 0, 1500},
  PlotRange -> Full, PlotLegends -> {"Blood", "Liver", "Gi"}]],
{{k1, 0.0038}, 0.001, 0.2}, {k2, 0.0001, 0.1},
{{k3, 0.00047000000000000004}, 1.*^-6, 0.01}, {k4, 0.001, 0.2},
{{k5, 0.005850000000000001}, 0.0001, 0.01}, {k6, 0.0001, 0.01}]

Clear[newmodel]

newmodel[k1_,k2_,k3_,k4_,k5_,k6_][i_,t_]:=Through[model[k1,k2,k3,k4,k5,k6][t],List
][[i]]/;And@@NumericQ/@{k1,k2,k3,k4,k5,k6,i,t};

fit2=NonlinearModelFit[vn[[2]],{newmodel[k1,k2,k3,k4,k5,k6][i,t],{k1>=0},{k2>0},{
k3>=0},{k4>=0},{k5>=0},{k6>=0}},{k1,0.0038`},{k2,0.0001`},{k3,0.00047`},{k4,0.00
1`},{k5,0.00585`},{k6,0.0001}},i,t]]

NonlinearModelFit::eit: The algorithm does not converge to the tolerance of
4.806217383937354`*^-6 in 500 iterations. The best estimated solution, with
feasibility residual, KKT residual, or complementary residual of {1.61364*10^-
11,0.00140632,4.73692*10^-12}, is returned. >>

FittedModel[newmodel[0.0209429,5.86338*10^-
13,<<22>>,<<22>>,0.0459909,5.86338*10^-13][i,t]]

{fit2["AdjustedRSquared"],fit2["AIC"]}

FittedModel::constr: The property values {AIC} assume an unconstrained model.
The results for these properties may not be valid, particularly if the fitted
parameters are near a constraint boundary. >>

{0.916144,807.213}

fit2["ParameterTable"]

FittedModel::constr: The property values {ParameterTable} assume an
unconstrained model. The results for these properties may not be valid, particularly
if the fitted parameters are near a constraint boundary. >>

```

|    | Estimate                  | Standard Error | t-Statistic              | P-Value                  |
|----|---------------------------|----------------|--------------------------|--------------------------|
| k1 | 0.0209429                 | 0.00345975     | 6.05329                  | 7.49086*10 <sup>-8</sup> |
| k2 | 5.86338*10 <sup>-13</sup> | 0.000480006    | 1.22152*10 <sup>-9</sup> | 1                        |
| k3 | 0.000834104               | 0.000264792    | 3.15003                  | 0.00245332               |
| k4 | 0.00290029                | 0.000969509    | 2.99151                  | 0.00390053               |
| k5 | 0.0459909                 | 0.00751863     | 6.11693                  | 5.8089*10 <sup>-8</sup>  |
| k6 | 5.86338*10 <sup>-13</sup> | 0.000278197    | 2.10763*10 <sup>-9</sup> | 1                        |

```
Show[ListPlot[vn[[1]],PlotRange->Full,PlotLegends-
>{"blood","liver","gi"}],Plot[{fit2[1,t],fit2[2,t],fit2[3,t]},{t,0,1501},PlotRange->Full]
```

```
]
```

```
\\(\*
```

```
GraphicsBox[{{}, {},
```

```
{RGBColor[0.368417, 0.506779, 0.709798], PointSize[0.016666666666666666`],
AbsoluteThickness[1.6], PointBox[CompressedData["
```

```
1:e]xTTMoPSmViYGCQAGIQDQEqDu3aG2uWGyQ4QPh2Dr/mvTn4378Eyvd00HrF
```

```
Z+3akmQIvyHQwe9Z]peeVAyUH+ZQ5Kxos9MgHMqPdpjaGTxlhVclhO+Q4PCr
```

```
NHeC65dACP9AkoMCh+mLD/sCoPKpDvM9DfgrePyg8ukO1ukb/Kx+eUHlsxw2
```

```
HzRboPvVEyqf4/DkjLKtSK4bVD7fockmIsjDJT/oMBh7brt3TvKXCB8hSKH
```

```
ZEG5E1drnCH8BSUOi83tizQnOEL4CRUOf5vkg9on20LV1zioMjz73mlpCTWv
```

```
3kFn6oNFZ7eaQ/gXGh0cZ546rZ9gCuEXtDsomwUcZzA0hvAzjjwcXJU+zob
```

```
QfgSUx2+rnsnFvDM0MH4yEY9vhMzHQ7tDa7dt0vHAQCN/G/L
```

```
"]}],
```

{RGBColor[0.880722, 0.611041, 0.142051], PointSize[0.016666666666666666`], AbsoluteThickness[1.6], PointBox[CompressedData["

1:e]xTTMoPSmViYGCQAGIQDQEqDk/s+asPJTk7QPh2DmKa94ROOSZD+Z4OriWS  
Hg/1syD8hkAHwfmtfjMb86D8MAeJIsGWCbUFUH60w4ff5vp5T6F8hwSHqx8/  
W8n+g/IPJDnMcLO4dE+oECqf6rCgxuC+wG+YfLqDt9Wpgz0GMPkshw7L77x]  
zFD+gRwH/ukH94Zfg5mf71Cw8GFzrymU/6DAgT9z/czwJfkQvkKRw41l6QY2  
plD+ghIHv1vrp4Wdy4XwEyoc9Gy/Lt4zMweqvsbhksWV900R2VDz6h000hpm  
iOdlQvgXGh1UvK7ZKB1Ng/AL2h36TGK/VM1KgfAzJjjs+ObfKFuVCOFLTHXg  
7rp6NfhrgoPxxY16fCdmOmx8Y2Ey+020AwAF3nTK

"]}],

{RGBColor[0.560181, 0.691569, 0.194885], PointSize[0.016666666666666666`], AbsoluteThickness[1.6], PointBox[CompressedData["

1:e]xTTMoPSmViYGCQAGIQDQEqDpF3X1m+1NRwgPDtHBw0rrlxSARD+Z4OV2ZW  
e1TERUH4DYE0+9J]25ny5GgvlhzkccHp2agF3ApQf7SC2iSWZbw6U75DgYG8w  
UcYqjBHCP5DkICOVYNC5Kwkqn+qg6DFlzc9VKVD5dlf1bBq8pe5pUPksB+1D  
vm6hihlQ+RyHFSIPEqZYzkHl8x2UKoze7bmaDeE/KHC4tNZoXfCWXAhfocjh  
/T/Zb8/j8iD8BSUOfpkRzdn5UD4CRUOH0rm/unZkw9VX+MQYlLtWrOhEGpe  
vcMcr6LUqU+g/AuNDs6f379MuA7lF7Q7ZORPPbPteiWEnzHBoSgtoXOPbQOE  
LzHVgWmxWqjZ+UYH4yMb9fh0zHSYvOPGv/W6zQ4Azit1Zg==

"]}], {}, {}, {}, {}.

{RGBColor[0.368417, 0.506779, 0.709798], AbsoluteThickness[1.6], Opacity[1.], LineBox[CompressedData["

1:e]wUV3c81e8XR5FNypaMe+2drHg+x0zIXgnZWdl732tc2QmpL5LsJell5EOT  
EIWiaEdIQiKKfvf31+d1Xp/nnOec836fc54j6hFs7U1HQ00jzkhD8/+v9s+]



IVAOGiyFoP6r+nkWvM+faVmMeotJF/ZdiN44C8n9B8Kbor5jIKc2MtLEszDy  
RdM2J2obY8n8DmZFFMhu7WvZ508Hj4r+3rN5mQE3wsLUP/IxwHv9c/PeQhmw  
sdpnkBDFBjHqssS5rjTIPdExU13ICaEDS6tb+9LgCGd7A4s/F7xHhU9cQlPh  
YWyH4ms+HqiYvPTW9wgZWLbYdSKiDkCQB7PRicYUEHLyopk6fhA+eG3+u82a  
DLxvpz9WFooAV0Aon/beJJDWUanZ4y8GslP7+74qJ4DK92mGLjtxyN+6t5Fz  
PB6OlFN8g3QJk9S2RwQEgfHt6dlX/JJwA1mgsfSQAzYX6fkZu6WhBY6r0JR  
uhg45aLy48iyJPTcCKq7gUVDaDeltapPGty+txxifxYJxYkqmiFR8sA3VzZX  
KhsOFfjvL4l7KEBxLTezfUEY1L6l/H11XBGOnvG88XczFKYrlt5XFCpB0JeL  
raenQuDD+sOCGEZlMJRQlvtoHQIz5hd1rZOUodukYdShPBiWdvSv0vurQPd2  
yyHHmjOwas9v+/69CjxZM63VuR0IG81LuzvsDkEZl8Ba51AA0Jy66BOoqwrF  
2R7bOXv9gatnSXqMTw04U7if6S36AA/vozdNeWrQMpM48J+KDwgGX8z02K00  
OgdTn48meQPhoMF3zWV1oJmJHCZleYFUNH/FPh8N+Dgi6DOT5gnyl0vm36c0  
YHFpk2Fk1gPUki+2VPZpQtzu0/diO9xBayLIPU5HC0JnZzYXpd0BUzTgsr2l  
Baf+vl5bqHAD4/dL4XsuH4Fn5rcOfpE9BU6YgXpQlA5UiCYzbfqeBAWKTIXy  
ug5EPnUKvhzjBHQjnPS/lhE0navhTi04Addc347GR2LQl3+54u2EA6TUPtTE  
fmFQpSAWPsDgADlbtPylYCHdo3fPmrbww46ctegE8C65IlbUbctzHk0+0ts  
ATDRZ2/e3mMLoxmiwoxauBVWys3z9EG6ob3pA926IjdFOufWmZrsHQdt7bu  
0AMozN/XwNMctMhHGVQ39cBqwPgXk6U5EGo707g19cHNXYuobXQcNr9Xirxu  
14f6Fc3ZmuOm8GXv/vHO3/qwzJF1S9vVBIYPUyhlGgagslsgiz76GFQlnlk6  
1W4AFcwsM7y9RyHnyocrur8NoLaN7curH0YQ9djGTlzDEAQ5jDXuSbiBKZvW  
vdm7huAu7zo2U28Aa2UMWWfuGoFG3db7+t+68K43VsdiwwhYn9IM7j+pC/1f  
FpeV1I9CtbyA2swDgHK5MYe100chsmiEvK6PQaalEcur9aPw+boW1wtlBGER  
HfhdNW0geZptzy6tA0b3LhPj7xiDDs/Akr/KEVD6wPXaed0YWD6xDK7oa4HA

7owcpHYM1oc7bl510YQfpoE/ae8cg4Idt0jfenUondK4n3nbBB5NRq2ZFqkC  
+d+1CP9fjmDr87Vz8v0hCBQ/KGV22BQqowZHipQPgW4AfT7HbWrewm6Pd88q  
g1x+jN7KmilgdgdzHh9TBp5b336NqppBxH7FXoVWJVjYeuFc0mYGyid55AcJ  
ijAubMgZs2YGZz4YGbXtUwBcr/3hCdXjcluj98cmizwUZlXIHGg7Ds8lsqrM  
eWXhiEDA76u3zCHqrUDrWIEkPPoUuXzshzm0ET5J149Igm1lLkfMhbQcSXv  
RdN+CXDVLpk8UmUBbPeUqxJbCPB195XnH99aw003UWazDARon7X78pDVEhI8  
tF/d8xAH3Rtu037GluB0zpnMICMGGft8JrV9LGHCZU5WvFgUBqIDxjnSLOHQ  
3zj2XfSiYA1RQ7d7LIEp73T29y8HwetF9j1adSv4l/6ixYlGCOoPn2sft7WC  
ux0GEy8FBOH7xZK2ujArCM02Zm3UFoAojytNx5utYJPtBzmgmA86n9TWiwxZ  
gbbY54T5QV7YkWmq/jlvBYWCjKLTjLxA+Xmn7CLRGhiKfiWOFnPDkMO90kB9  
a3j5jnzF+ct+4Lx3vwhzt4Y0I0rqAc39UJo2lDNTZg0aWma0X1a5oJH7U4Ly  
fhsw7/9j9aKKE5Ziv8bsVrGB6t6a7HABTjj0bjFiwsIGXuonFX+V44B7tRuB  
idk2kKjOcW6XGhvQsGz7WjbYwFzf5fVCl1YwCKbzFu+zgdliYlBVxZ4ps7m  
8pTOFrzON38/WsMEXGVcJ8pEbKfw96os1xgj2NPw2QUjWyCeHU0v3sMI7/rF  
jnPH2cL9NcmHP1MZYPmEho77ii3w5MqEBj3aBaq4jqYqhx10zaw4nhbbBbFi  
+of3yNtB4J+HrQXpdED37bj8dV87aDbpet3nRAtGFjbSKRI2lCHl/T5jiAay  
bjkSbartYMLo08C4Hg3sS/A8sPneDkj0dn5MsTuY4wdf/qFt06BdclCA5G2s  
zCCI+7KgPVy4yMkfk/sXI7DFshk62MP9Y7fNPvVuYWoVedsFw/bgwSDbupKw  
gV2rWlUd/mYPRSea9or2rmMidfaBLEwOCCSqdUeHaR1jaRGeStd3AJUF3JjS  
tlaltJG5Hro5QPC1p3sdGNaw9fbZYzRJDPBzsf6Ui/dP7MP95va4dgdoEjvz  
I1BIFbN7wrV896UDhN9lTpGoXMEGBqIkf606QMnhuF9RXCvY7TFUEizvCJOE  
+16Z7l7GsmaGw72qHOEb+9Ub+1QWsX/zKteu9DjCk073/YEW37ClpZJP76ap  
ckP9q8/hC9ipDVerE7wnIF3oYeTRF3PY+J8HmSWqJ6B40vbpE6Y5zIRGsnfM

6gRcmPYRzTb+iqky/VAwzzkBqQmDD3knZ7AGNhuf7IYTcJ44cDZRagYT5rpb  
3v/kBLhPnHI4nfQFYxJMZtWndQL6P3/P8mt9xt7JcSyoRzkBiWFD2G3xA2aj  
HC4aed4JFve0Pbf3+oD1H55wbG1xAqGnlBLi/ffYLS5T+6bEzwdaaq/PPAW  
k9Lf9c+P8SSQXpK6xKemsYqjp9XqiCcBT9l8rvBzCsu0VKwRdTsjHWvRfz9q  
vMG2bc9PuyaeBPU/zgPcPq+xsBMB+8ounQTWaW/L+YuTmItHD5nn5Ukoj+HL  
LNs/galEWLixmDhDz/TP7RbLcawu5tYF49POUJa4sOV5fQwTSuQdSU9zhmx6  
9Qg1jjFsT8Z7HZoeZ/CrvZh/4eMLLCFLP1Jn2hkme79YvrF6ga3m1TXFbTqD  
djHB+8qT59j0hWDBX4dcwBrTEDePG8GsysasVaxcYGktv1gvcRh7UqmeFRzk  
AiQpEyHZzGfYzYZ/v+frXaBWs3x0om0Qy+jKf/XugCvMSn8xZPbsx378iY4v  
0XGFYnGOyet5fZijtpuluYsrVCrz9IPuP8FkupX8u8tcwfp2A/fSkcfY+W0+  
jsh7rnAv8PM+htRH2F8d2ja5aVeAQFc2v+cPsRH8xfZ/gqegjL3xh3ziA0zj  
X0eVzZFToDF1Z01m+j5WhVUdZT15Cur+vlu8CvexiN6wc3GXTkHBAdlUY/5e  
jPXj2clmVjdQ1n1u/ovxHga0016ZQm5gbhSMvdzfhUWKhq17ybkBT1u28T+p  
Tuydu900oJkb8I9c3xHya8f2kYebN066AfFmbUp20V3MuEqPNBbgBt800+zU  
+u5gNz/JSGRnu4Hvnp7z2rq3sVm6y799/nODA0M9Ij7ZhgmI7xvUu0Z9t3T4  
TDi8vIWlef4J3hpgw8JyobpnpFbM/stghx+z05Sdb1AwPdCCZe2GHEMBd1Bv  
XE9bEb2B9RDaxEVL3OGVG2vpOFczJuVdtuv1MXdQwzTvrHA0YS7pnK/aTrjD  
G7ZSq/OC17DCmrT6Aj93OL212Jqh2Ij9mQk8bnzWHWh8pA+qB9djSgwfDxlu  
usPefyq0Zy7VYV4Sdqv/6t2Bki4h8mmoFhv20blwt98dRBtW2HONarDKr2wf  
JRg9oFac+YBvRhU2vod8i47PA1Qt6rP5Zq5gTFLr6e8kPeD9K5tMg2NXsDDf  
dzllRz1gueHWHgvRSquw03o71IH6zmvwqG+WvoxN1z8ZOX7aAyjDoWFWAhWY  
4XxzBD3FA2i4FsR/85RhcUziRz+WeIDn0ssDjml/Yc3SF/i7az0g5FpMJrPa  
JYzPPxmPeOIBYgtcf8wjS7GFBQvGL/SewPKidP6VaTFmtDb/rWW/J9StZFIK

Koqwqu3UkURxT2g4lrH8bP08dpKzvYRX1xM68gqtBO4WYu381nFfLDxB0Hb5  
wgvhQmy/+KLLTVdP+JudY+CWfQ4b0ixCNE3wBPcnDX4BYQWYFNbJyJftCQR  
KS7qr/OxNGPbxS8XPSGpxWQfz6s8T0dk5q2ku55wVXzitM5cDtacsqzbukr1  
p+7ZoMvpsxhzVhYxmdYLhDR/qzeUZmI+5wlMZpxeMOVZM5X+nIldrHV8PiPv  
BZ9NM2MkbDKwhBurt1q1vSA7EB1LK0/HJttzLiSbeoHh92iauu9pWMFgryu/  
nxd09V46mFCRii200+nNRnuBdpxe+esdMmb8bo14K8MLuvu+r5t6kTHaFanv  
ZtVe4KfMt96nQ8LCeM7Fp7z3gvMNEddrjidhwwdlTx1f8gLftBtG/A6JmIz0  
Yz2BbS9INf4u7+mbgH0+ssnUJuANJ9nwrNArcRgYnv+elu0N5lX88vf7Y7Ey  
c/kXxzW8QZ5/2H59PQazdXcv/WrnDVtu+7aVTkdjLf5/4tu8vMF49FTqk/oo  
jDWi+BQp3Bu40KCbz3Ik9jjqYTgOW94MpjxhvVcBKbWpHzbfMgbxq6K+axy  
hWGFtwdLBae8geGzoufH5FBsCfdOmJv3hmLNxGNJKyFY3YuL+uQ9PuDJSfpj  
/ygY2z11SNKCxwc2XB31P94Pwty+PGMWIvrAocxjleV9ZzC+DdrR23o+kJKs  
Qbq5EIBF0JTdJlv5gBgL/UrungDsOZPaRQs3H4gZQPXVsv7YWSF/t/IEH3Az  
8+HLyTFtnRHI4Q6fEdkYrL5iXxvzNJPgUnyqQ+ckSjvIr3wwmoLssSVX/vA  
0uv00XkBL8zmvZ6j4aYPnKJ5kaCKe2CNDJfDLJhOw8kt825Jfg+MRuFPzgn+  
0xD+9l3xYKw71pRw6/4ZzdMQbdaxYG/qhtFVc0xHHzsNu74KpLRGn8IcBwPW  
SSdOg1F3xoVCD1eMXoAgWxJ7GuqLuj0rbZ0x17tFRXjHaQiaVMjjueKIb1b  
bu5/ehpmhFiTFPsdMGaG409HX5+GXPvZ5N51e+yuLf3070Zp00jymmDqZ4ex  
J7jzrTD5wuyuku1HTbaY19VulT/8vmA+vxZ4d90G41yNPM2h5Qt5L3c+i5db  
Yz78oyR+E19lI83v1Ni0wu6BQpm4ky9sw13lNScrzC9/9rl6nC9g0snXixUs  
sQdyDlpunb6wN7H4bJWYGcZne8vWf8AX6B/cX/8sY4oFxXMER7zxhdKXVVXN  
R0wwwYG+q5lbvqD9kP7K1UhjLGxFHC9k9oPAqvq+IxVHsX6+IMkyAT9QiLuk  
qTNshEWc1mC7qeUHdKzicmR9Q2wgr0iyy8QPoh5wPzTONMBE7izrPnbyg0P+

HKNJY/rYs90NUa/j/GDNroHDIkEPk6ji/0Db5QfHJ0j2jFyAJTyN3GIZ9APh  
c/Wz7EwYNrr8Yj/PIB88aivX793QwZKxrGMyf/xAf8Sb/9/yEeyVz6ynKos/  
7B3sDV/d0sLk8vSSkKA/VOKPm93ZtLDJ6a1W6yP+cK/k7dlkEw1MYbfDM2dT  
f1ATys8qiVDH0mRvffU56Q+Or6Uu09eqYcpxAULx8f5Qm5g89+fAYSyLdzt9  
apc/ZLE7WXScVME28752ewz6w5bHU9XVe8qYL8PPX6JT/jDcsJWVKa6MGf5i  
8qnc8ofTR9+VCNEoYW2B3BWNmA0ALtK5NvWbAib2ReSVsEAAZN1cF5D8II/R  
jKkblWsGAOHLaIT4F1ksyEQ/yfIYAMiYP02aX5XB3t43vyN4IgdOsoVNTDLJ  
YJ0t3hKXYgJA60z5x4MWUlhk3nmGC3cDgPP6xYYvikTsC/1lZN8XA02dJr/r  
YgiYdWjJFPdEALhWCVIu94ljSoH3Z8+vB4CIRV27bbQYVvF5SNiGIRDktSXp  
6yZEMbaTk/ZcPIEgoPDuu60OKLZw7MeTgsOBMNWn/U2BTwQ7cX9rx8IwEB6Y  
9r7e4T+I9WswqHPYBQJNiJwQG5swViN5oC43IhD+fdnPKc4uhLnRm1KybgXC  
GSP7wjvhfNhwgn3PsYeB0Hk0nQ+r5MV01tw3GMcCwbLcaNevMR5M4HPMacpq  
IHx30KN9acGNnXVKu2xEdwZK054+SL6wH/v9In+CnusM/MpYP+g2sw972Vt7  
NE35DJDXBxz/FXJhBhqtyfq6ZyDlozqzy+perPVG9106qzPw/ek4nYLDXqyg  
YlySFHIGigiSkaeVODGTBDrGpBtnIDfgOo2eBivW8ZMNdHqo//dKOikbsGBS  
Afwxf4fPQJWei8dpR2aM3klpLm7pDLBLSRnkljJiES+OiGjtnIGI41Y0yw/3  
YJ+MjzpusgWBwIdTSsnrDFivumt/tHwQ/PfbKXNfCD2mcMOPRI0nCD509rU2  
3tmNIUtEaqybBcGjhJxnGbt2Y3HcOfURgUEQNuGapHuDDjv8syMz9FoQwMhi  
hMwxGmzi5tsL0c4gcH1Ktjfj/oc82oQER/uDABGdE1JydlBeZPJ1ldkgUKvn  
sH5c+xcRXrWsf1oLAj/35pMuPX9Ql9on7PyuYOAX3WE2eb+F5jYMRn+KBIPX  
pCa7quomSnKMEqxWDAY+j4WuTt/faH9HnZctCoY8npcP6q9uIN045o22k8EQ  
mByQ8Fp2HV36OyIYVRIMWp937jxM+YmUXGi9JWqCQe5BwC6zz6voSbdK86tb  
wbB8Wnbquckq+plUDOovgiHDJflaQWoFZb1/cvbr+2CQnfT9XF6+jETg9+iF

pWCwff/2RSDvMqpNua7ylz4EDt0XPCGnuIRWlIwcbNlCwE9rbs37yHek/fFd  
fNP+ELDNHj7kaLGIxnQ5HzuLh0CI6TZtS04CotkV7tANIVB/Qf9ny8mvyPQW  
SwK3cQiEa+1bYrg8i0o8qyvPWISAxJM9luZzM0ju0cv5A64hQKd5ZmRXzhcU  
HRHEHuUdAnnLXxQFZz+jB4Q9h4YDQ+CRcn5ilOFndCJdIyEpPgRer2T6m077  
hKoPv6h8RQ4Bjd33BkGkj2h5xu+xQIYIFe/IEsm1DyjD6D/296UhYCBVnu3+  
7D1q3bNTid0JAA6L0IEDv6fQ9t2Sxxe6qfZdPndU80whY1/FhR+PQsCcn7Hx  
2pE36H2/26HKsRBonvpx3fvSJJKJ3XT4/YaqX/Lx+bWxCRQIXZhg+SkEeJv/  
ww32TSDWrIePaVZCYEmryya/+iVy0HJecPwDAjFg4/Lw1ziqWlhjv/kvBlzm  
Bw8Gm40jDVMJR3f2ULB8Lsl2kWkMebOeXbgvGwq+NQxaxJ7nqHmQ3Nh+KBQW  
kgXzR+Weo/WsBP8bR0LhXMRmIB82gjKYQhbKTEOB34XzWafEMzTc79d43iYU  
gq5xELilhhBPpqd/1slQUE2/O8GIMohqGRwWogNCoVx59+0V16do6bFIY1B4  
KJy90ZhnQepHaukm/t7xoRDJsU0wudaH+nahBevsUOgZrP/Kzv0EzdEQF+Sv  
hcLihwDWXI2HSKlXuJFwKxScGfl4KwoeojhkPn/BrIC4UODW57F0HzHusCww  
DoYCA0e8u1NnL7Lspm/8NxoKe2TrfqhJ9aLShH9+629CYXz26KSqWg+S/rM6  
/3khFB42UFYKhbtRW0diw5vVUEiXJdslitxDnbGzfi+2qP66660LyXYhk9+v  
53HmMKikvazgfkID+f/qnb8oEwYTiW+t8rnuoNa2zoYCITAIshSOqLO+jbbC  
2/woWmHgrHvC1fFiG8perZuPMAkDmt/iY7Gat9D4zSsNAdZhUL01S+td2IqE  
Qv/z83AKg9xiZt13yzdR04+8eQv/MJCMFg+Y7m5Ba82ZDUZhYSCF3/1wUq4F  
aQeR/XTiwiBHd+/8N+wGGlqMnJfjCoPOIqKzp+x19H3eeZ6+MQyYbOxeXQpo  
QGoN9g1/b4bBZj5Lo0V+PUrytT72REGFib0F/g66xD7V/35D0/D4PMJKVI7  
8VpkX6vTMPEiDPYRY/u83GtQhbe63/DrMDDY7XNIqbYaKXyRme+aD4MzDT0c  
4vpXUdRVQkPrShg4ND4Se3WpCuEewn4Nm2EgXLaf0+P3FWTxce98CVM470t/  
jAs+qkQh737PhUqHw9X1lCthiuXIrDBd+aNSONyVdbjrB2VIyogrZlIjHN74

/r0X4vgf+nBdlkXxaDh4m47/d7niIrrn3m5TYR40JTnTj64MlajSbsMyNvtw  
yOU0zrpEW4osE13IF73CwYxjyywpuQTJKX+LPBkYDIzChbHLfcWlCsyAHwgP  
h0sZOTWneYpRr9k5iwZyOIS9FnUKf3QeKQk9CvWpDIc6/YovXq7nEOtzy86X  
deGgNP3qVubzAjSX+pb08EY40Ksf5w09WoAqv62fF8fDQXQu0npXRh5KuJw6  
Xfg4H0prh9825eUiRxtOIt2zcACP26IVl3MQZ5f0nQ9T4TD5iCaB8DoLLQbd  
2bH4HA5r3iN/mWizUL+Y/tGehXA48fvf2nfFsygly3myfDMcDs041XteoaDI  
E/lbTrwR0JbzsHr2aRoaYhPSHxCOgDLvM/6VImmo/n59tqZEBCQE2fZyJ6Qi  
N+kHQnyHI+DOo9kcAX0y0n5r7k3RjgClb8cTXJpji0/c1PV1/QgwMJtnLRAm  
oee/19BL6wiwiD7weS9bCmpqllEMnCKg8sgzMU6eZJTpxv78lnsE7ASf9YoW  
SELQL+leGBIBmzS6WtZHEIDLBadUi7wIoPu8fiVuLAblmH4dxIsjYFeW2H/J  
TDHI91/4foXyCLj5dwtXM4xGIqdza1ibqP70v6tKHY5EfwUEluJvRcA/Vhmp  
80KRahK4Vu1bZwTM1t/jagiQAVqvX1Pn0aAln1LsIhMOApcMOPUFEBBTy6z  
sQvnhyHjite09ZMRUN/S6Oe0GYpoGH7OZ3yNgJbSspa+6RAU/JLlakAfCYqS  
dgpbt84gr+Wsz7mskdb7U/FpwWAggtylzo19keDY07LryEIA4jS86xcgFgl  
Zs8x3jzj35XCurelo4EiYWlyOUgP/ThbzLfp6VIOIx7xko1+KKWNu0+QiwS  
3JOEN/OUT6NSzusV00aRQIeODusn+6CUwL1REuaRQBN5+Pv2qDeyIrwhdDpH  
AsuyYFdethdaPR9A/hgbCVvXCHHxWh7ozY+RE7KkSHh4Nyfl1k139MBUVTKy  
MxI2M+XVmOXD0fld2+8ZL0RCtdiYu4iiG0o45X7XuiIshPemaW37n0JeXY/z  
ymoiYffzY3pjsitSDc/TUWqLhHsX8OGkXmckNLK6P64rEngCNqv5F0+i3bIO  
iw8fRMLxjEMTQ8In0ctPB/9zeEHVj9Gl8So9gaKsb/5OWoqEEwV7NK+N2yPX  
Zu7n/b8ile1z8kNXZXtkxBxXx7UdCStHFVm2Cu0Q7wM9+1qWKDgsPUle8bRF  
NMJ18stcUeBTypadOGqD5mJZ6LUEogCGLHb9MbBB7crjt55JRYGZZbfxkjo1  
qszVyOZVioIzVw54et6xQpnzZR7u6IHQM45HIC0r5HjFe+8vwygw8j8UoWhu

iTY5N4KEPKPAneeLLovRcfQp8KSRj38UqFoOeWWRzNBAf8+BltAomAxeszj+  
0BRdSskc0k+JgsWQzwEJjialPL14NZcSBa1v+M87XDuG/DWs4ifyouC1VnCw  
7a5jSGuZXyagPAP8Aytvddw/isTMkmhvV0fBeDCBP1vqKGKu/zS5cy0KXphp  
a+QWGaGpU9cohZ1RUEiiN4yJN0QJl9ozHRNREHGCG0ErRR+5a9E5Vr2Pgqhr  
9o+ydPrIqKZvI0trFKj1vlKqytRDe+OtW05uREG0FLOpbpUuWp/hFTf4FwXW  
nZeu/lXVRdOWb4vl9kRDxA+dXPdBQLUSvvHbPNHgHcagdJwOUPY5+aUZ4WhQ  
wxr26RhiKOTvqtuwRDScT+s5vJSDkNZootFltWhYN+XE0pV00Eji+b269tFQ  
Ynpe6/B9LdQ255gm7RoNLWHv3GQPaaFLNsIbe32iwdS1ceBgoybykm6Y/hQZ  
DZsdOs83ajTQsalgi8HEaDB5fP+ynYwGUvh36MGt9GgYGMQEalvV0e9xvC6t  
OBp+0VyN3jesht5iaQJnyqOBrPipdNVNDT1oPJZrVxMN412KLY2DqPclPEw  
idvRQ00wqKGufBijyS3o9I9HA10sX+/XZ4fQngs3Wlqmo0F/aJfo14RDaJE2  
Uvzil2hY4+qqvatwCN2d+Mfov0bNTw9hTPaSCjJL5R5n2R8DcVEe2TvZykh5  
6Y3RmmAMPDLyWCYcV0Y8Jyo7psVjgK2o7+0UhzL6qCB7+fqhGLBd8Nl18qIS  
inoD/hY2MVT+LEV8jVVEJw0Z3qqfjIF+nfKRzv2KCFoGLUQ8YyAngV5t/y0F  
xJjh3glLAauvZZyn9uUR8vLgvWv42KgGkU/lKmSR690fhR4Ql6BrCs1geTj  
8qhSOZDmfGEMJcz1D9Ncl0PpZcrh8ZdigP2gFfGHmxzy37Mx41kVA/ib99sk  
Xjmk+pY0qNoaA6Up6iGEHFn0NPNCyasXMaDo8XbDqEAG6c390Kf+OgZ0Pxo4  
8TrJoHtHjXNLP8TAn+6ZXWFEGdTMsjnq9CMGxKXf89rel0aSPlbJXesxIFPg  
2bi3UBpVPm6IE9qJgdsJOdvlXtKoMM0p9B1rLJRFxn1dY5dGLF9aA7H9sXDx  
KU9y/awUStNn8a0UjAVnFYbXf3ukUBTdPVcPmVileZH8kS0FPrhvt/poXIs  
hFn8iTG1k0K+9wPtCjQxEBEa80GGqhRySjlgNns0FsaU/v2t2pBEY+8jx61  
ilXn3FutAlOSyAwb1qu3jwU+hRqFiR5JhHaSNP29Y6GP0hmznCOJ7rpMqA4G  
xsII59+japGSSklbUukulhY8ncveFbpKlrGEDxJL5FgIGajz9FCVRP9NaYhZ



ZMWCh8aB9h4RSbT/yLkDLediQS7sXBAHuyRi2NLdH1YZC1vEMYNT3yRQ8oLL  
HGN1sTDK8knHZEoC/W5fZVa9EQupul3xO4MSaCH6Ku16dywIRFjELN6QQJ4T  
f/7aP46Fl9OmnH5VEmhazfb33aFY2Hem+PJksQQa/rX7R+xULPROFdr7J0mg  
o3YuC28+xcJuiUyH6HAJ1Nt2e+bIQixEBh+n2/SVQK3hPtPbv2MhY2Jgj5Kd  
BJldwydcaeLgj/ujl89NJVC1Cu9Yz544MHRiOdSpJ4FKVvqeknjigPEToc1A  
WQLFBuVfpVeNA9uUkMtbHBL05zCp1edIHHxm6L58c48ECLR4c71PLw6iPqTa  
2f0jltfvWdVnreKgLHdfgu4SEU2Yfb684BgHtR+JWrEzRGTZdOQ/U7c4uHbW  
0Dhhmoj0AhbPsQXHqD4r7MeDp0TUNWCQGxQVB/N/PF/+6iEiVZnyzJHEOFCM  
kqodvU1EEvPHk8/lxEG4P7HKt5KILhvXxq2ej4NFrzqBvcVExFe/E2nzXxwY  
3nbm0ztLRMynbwRyN8ZBjuOajlAIEaW89N3F3RoHaoouXbnuRLSuL3Zpf2cc  
uD298djEmog+iRT37RuIg9WPmr8TlInIMd/cdd9oHGjK009PHySi4e09v7je  
xAH+8uNDFzYi6nwTJ8a1EAfak+s8pTMEpHRMtWPvahzs//dAR/s5AdXe/W6x  
dysOvgj1v3/VQUCFRW6JnMzxoDRRzfr4LAEx7hLYz8kVD2eB02ZXCAElhY41  
cgjEQ4nWdDabHQH5mxtNssvEQ2Fct+lJQQL6c09fELtKPDjn+uSd/Su07GU7  
6Nm14uHSwAWtE9PiSI9R7hCbSTxluXYatV4QR+1RM09ZrePBnoR5SISLI4WZ  
CjdWp3ho9Y1w3XtcHAK82JvH4h8PbQe4Q0T/iqECpUECS1g8aLTv11V+IYYY  
Lqd1McfFQ23LN7/cajG0Gr8xx5QVDzu2R7VojMTQwOG3+oyN8dB/eYC3NkwU  
QXXJmz2tVNNl0vyShii6w2UZuqczHuSuF9Aqbougqh8PKhgG4uH1Rb54/2QR  
xOeacJhhNB5od6NSSx0RIDd0elj+DTVeFc8ZhtWDKK6hfnP3QjzMddtdPzYm  
jJZ5PQp2r8aDf3um+l9tYeSTISi5e4vqn3adzM8rB5C1Z57tLuYEuMe9rnnC  
RQjJHIi4QSuTAHfD6EmtF/hRZba8Ea1KAhiJ97xSfc2HeLZmp2m0EiDpEV2Y  
FTcfops4wUxjkgBerNGndyfyoDcFmPeOXwKYCKDR7T37kOW/33+2QxMguD10  
ckeQCz0501q4HZsA+//ka9DJ7EWtjS7Tev2cToF17120LP3aUvZtF8E9DAvzG

2u8LMjIgdEyeHkzAaRoks3npnehAmV5nxsdcC4A4GOZmVUuLilwtbno+TYAW  
u5z5WvktbnL280eH5hIg5ceMTErgli7wCOFM7XICONTla8r13dOpnLldmPKb  
Kmu9auoZGuiu4Zp8q8qYCJUBM79FJ791NwcKRZRLJoJU+M09ljx0uFLq9YvR  
ionQz2j+TPzvbrz1IuqxUk+E33MyWSvf9+B3n7gxMxxNBN93vZmVv9jwXpGa  
yiAfqn5M3qa0KTc+Oi7/DKtJhEbu6lHrs6K47Td8lf96lhh5nRh4Gi6Gv6K1  
5FtrS4R2ga13Xu7i+JRCmGf9o0QoK3r0hNOliH/JvLPJ+SUR3hV89yEdlsbX  
tTGJT2JjkCBDMfefUMJjbJ6b3pNJAtUCzyc2Psr4lp97allKEkTa6gt9Wlfg  
/5Wk3jPRSwJrz2XuVaFDOONKn/Ut9ySoStOQo0k8jAvUWCanVSYBRQbQdK4W  
rtQSIT9RlwRXP32mFZM7ght1IU5J36Dqi708MDt4BA978UF9pDsJio9JKn7n  
0MEHtkOW+aeSICbdpKa1HsPj7M+53+BOBj3duFSfbD18as+o/pusZNj5I6CW  
72GMr3Ktr8gVjsOhS+kT9I+McUZhgcrki8lw30tu3VfiMVxV1eMvoT4ZYl8X  
135eOlbnuK22BT9OBp8x/bcJsaZ4hTPTeTqaFMjyLJBQqTPHzW9L7y7VSgGj  
MMlfppescUe9xfoClALCigmmndOPWuPtI8/GzeikQiUW6DrHZ4BHzy7EmaRA  
rRn2vphkg186gGRcnFlg+PZl85d+tnh1I82InSvV3rXUHJpqW/y6+sNwc48U  
UJ38+PzQO1u818q4G/NPAYenG+earO3w2XRrS7G4FOCtWd/oPmKPL3Nx/xJI  
otpf5gukibLHNy9PXNxHToGP9tlKWIs9Tid/CbFmpMCyrMuln/P2OGun8+fd  
WSlwoEi/hkPEAec5ejBzO5fqT981DjkrB/zg+Ee59Xmp8EW7mnA4wQGxcq9+  
sVScAvkBRxR5Kx1wlSWfqK8XUyBlIDkO73LAteOlBT+Up0Dr82Qr3mEH3JBx  
sWfySgrl/Tr2j+2VA25e3Oz1oiYF/jQvDueNOuCOYqFMAw0pIBYZxZLxwAH3  
uHGo+cF1qv/4r3/vqx3wA011666bKVBGF7uRGeOARzxt37h10wX2tLPrnNF2  
wjPs48uaOlJgwu6xYOWPezzs45uTXcKinpce1daYI+fc6GZLb+fAqySI8/b  
he3xS9sPskoep0CmMabzuNQOr85KV8x/SsVHgTm4cdsWb+Y1Hqc8S4GE1qnE  
02a2+N1q5tiUFylwz/Nq6GaWDT6A5z8IfZ0CdLGTzZPzVvi4qfVp/7fUeE0L

pklsVvjbyf2snh9TQEE/tylP1hJfXr1oZzufAuxbrza4u8xwHsnqObXNFGi3  
K6mXLjDERdp8chW3U6DIVILiWyl9XFpXWkWKlgRPpOafnboerjL87ZUIPQm0  
DspJG9YArn2yOZ6fiQQPPLjpB20QbjQXIsLFRoL6MrP3yQVHcIvIQ4+Z95JA  
aqCwwW2PJu5It+63i5sE3/oS5Ig9arhHfjv7Xz4StLgPNuW1qeKBQvG31oRI  
EHghsFH4mQoe2aDj+F2EBPJtL+2nGZTxJDWa7RkCCTJ+HMmMeqiAZz58cOWd  
FAmQQQeja5csXmiZbjQhRwKaOSsb+19SeNnbo99GEgQdF11xyhUAq/1Zy7o  
VyWB6MH8CW5FAn5jY0j1vgYJDrcVnLimIbT/Zs8EKVNAsvsjNC6bBHcnmGG  
QRZIEIY3zebqC+MNbCs/3uuTQJYnz/LbR0H87/7tyaKjJLj7At1Cq/y4pRDT  
g2OmJEiqMbtyKoIPvyrOfW3HnAQcRw2vE3158XUZ0aJb1iRo87/j5/uMBzdR  
kU/0tSeB0mN5v39XefAKTU2fA04kSGTRRA++8eArYGgx6klCgVXv+MxqXtzA  
2EqD4k4CvhONHKKdFhiphYuotjcJVgZO+04ZCeCL9n7MK74ksD92uG2USQjH  
XCN/1gSS4HqdyBF3emF8NjD3MUcECXZkDHK51EVxrYiLzY+iSbAuUUCqOSWG  
58bXXliNJ0FPZ8bViExx/AP5ZopCMglqniwJjQScNwsbr/PZBIswufTtONE  
nHLuqXVpBgn+yNxIJeAS+JvSl0eOZ5FAUL/4UfcVSVyh8iOBL08EsenGX5M9  
pHBS3Xe2u+dIUdc1wnF6Uwofb95cDygmwbSiikfwKWlc6g79B5GLJOAPjKir  
zpXG47v3Pn1ZRgIs7ur+8QRpfPjRgdasShJ4GPTek5KQxsWGpP/Dqklg2DYm  
nE+WwiPHDqet1VH50PbFdVe2JN7/RvdMwzUS8Jxvab5pKoELfTpu73qDBCIO  
HRcZ5wh4yPwJbN8tEry9Y/7E0kscf7jsLdV/hwRfZA9P/Hkoivv/S9xSxqn5  
DGX3IEcJ4e1CzRX0z0hQGrdm/KaOCWcldFI6n5PAuci9i51Ci5+SfRISPE4C  
Y0sDRYZHq90MWu/0Xk9R7/vszze/vqBzQndBNu89CVIezY11a27rNBmv79f/  
TM037a1o6WMMYMaB/WvTApV/T025WPy4UK2rwHP3JSofpodKip9yoy1viQ6e  
VRLQad+gNf7FhyojUHbKJgkeGhuEkpeF0Vq8ScThbRLs7v8zuvpZBB1NtXdZ  
oCEDpat6rhQTQ0vnghRtGcng9Gh+6/U9AtK7GMfHxEqGn6GMrSmviai4MoMW

5yCDXGX8iUPTEmiurnAhbB8ZyP+lDUc/kETaNyrGJHnJYNnitTR2VgoV3Gm8  
Ny1AhiQZl5JnitLoc/edmnPCZOCzv3F14aY0Unv8IM9IjAxyWU/W9hkUNbQ  
cPQflhlernp71oIMcj6Z3fxPmgw3ox3YvhnJIWFoz07FMigWfqSQZVXBtHE  
7hZiVCFD1vmwd0Et0mh0z31rVjUyjB9jymhQkkbVJYlnObXIsHLjZEF+NXX/  
I2r17kdkuMr7mVDALoUE9G/JHzAiQ59KVfb5sARafBHsJWpChq6zEY2Z0hII  
d5P7j2hOBiPp3FWTNCIq+DH3QtqaDLKemlk2HwnII6mGUcGeDFJnV0v36hOQ  
KpsHpuJEBprvykZr18QRQ5lwlJorGcl+hHT4C4ujSZmpJi0PMmC3pQS+lImh  
ho4Ln5EPGQy6R/NHpMVQnLGtgL4/GQ6YzOmW9Ykiswl0q6NBZli+/smhI0YU  
Cfs8o5iGUFmJNaRlqi2Kltf04hZRZGDSqJVR2COKHqQa/bKJI8Obm0T2xEkR  
VMS1S84xiQy76O61prWIIJ8rPR7OZDLoFL2Z0ZcvgjSUEi66ZZBBb3w1YiVS  
BDH3aDz3yiLDoHyU/LKnCJo+/ovBL48M51hfTb85IYKap2/qnCmk4judarnj  
IISAOliQkvI0M04YlfnKoKst2SuRV4iw8XtvE6xIBFEOPv1Y2wFGUolRky7  
M0TQ0m81X1IVGSj+iE08rBdB/bVuFuRaMsw9/COdOi6CLh0+kJHRSIYmjsG9  
xsyiKPDR63tZzWRIQHTOp0xEEbIp+ZnXSoYvXYHa/udEEecna5nzd8jAktNQ  
efyNKPoUwuF+oZMMtZllmsYEMdT2b/DCfzgZuE6apZUHiSGHA4b01U/I0Cmx  
LeZDK46kmmi16wfl0BrGEupmLI62tPCwpmEqflorXg9zxNHQ07iGllEyfCfe  
jh99Jo4qHNU/tL0iw+R7F5UXzAQU8vUnT8cbKl57V+l3UfHXi2o53v2ODPye  
MeHXI gloP/2ZtPufqPxI3thgqyKg2fPSXY9nyVDPHsUZ1EdA7WKzK08XyLDW  
uaXJQd3vsm5WSQ0vkUHFMLXQZ4uAnOHUqdFVMvBU6VU5sRCRwohgyat1Mhj  
4hoP+YmIxnVy6M0WGWjT45zbiEQ0uli06/0OGXJH/uzTUySi6ngrrc90qSCX  
+sQ7RY2IopjZQ78ypIII3SnH1CNEZHxxo04bcypcaz626oqISECK8u4Heypw  
fmPWksSIaPGOPvcaVyoU8kuqLesQEW5IY/abJxXCy8S+P9Oi1sP4PffgVRY  
f0nyHj9MRB6esR00B1PBWepDS/1ftXVw8u7xVNH/lc2zUJlqInrUowSabC

p0rR0mohInr3WaBmSyYVxn0Liyz2EtEdI33xRYVUuKBi6HZrNxH5sBYdHFFL  
hb0BWyZ2CwSEgu+V92qlQsC1Vjf2twTEM/pFsBWIQuUor9+vEQJ6cuEwX7FR  
Kmpzqray3SWgii2XkgyTVDCDc7QV1wgoyiVjf4w59b5zs6KCVwjlvLe50M86  
FRr3Ui61XSAGcFEJzpP2qTBz6fHqxXwC2kn/l2fmlAqXGH/d3MokoFdzkml  
NRU+HPY9xZBGQM2mltmKHqkwsh1KXkwhoIzmGCZRn1RIPOJdNZ1MQK57r1C4  
/FOBdqDIiFEQGoRT+l3B6VCnSHtdTuqPvvESuqv0FQ46/si8AzV/qymAN3X  
yFQYak/8xZhLQHiZXspkbCp0zZwcFygkoJJ//jtPE6nxVtwvKab6a/S4a6sp  
PRUiQ+P+5F8lIGGpLzEVZ1NhcZ6mfa2BgNazWdfyc1Phv2t2eTktBFRr6flz  
rDgV3PtoOg/iBMQwvfnNo4aKd25CxsXBPQOSfrLNKRCedxQ8of3BHTnisWc  
4HUqHmbu5cqzBORzuvLLTlsqGPnsSnBapelx00+x3J4KuXr+yuK/qXjlr3z4  
eC8V7l/eu9G0TcVjVffto0epMN171+HdHiKqsPM/eac/FTqjaA3DWal8bc98  
XTeUCsHnRL9e5SQic8Euh4vPU+H3WZ2vPvuJSLp88us8VSweB231MpLRDsf  
WGwTJqnnf+/UJAKQ0St91dEz06lg7fbjTi+VT821zpanPqTCz7OhA8HCRJTB  
ID5s+SUVzJcaz5IPEpHayMuBQ4upQCDfyOmlyrNfEn08a6nU+ech0049j2+Y  
GzL+TgX7oOyuxQNEVOIU/XDzDzXemK6AFar9o07Lut/+pcLlEc6Vx4JEZCTS  
3z09Kw2a/Bto/an+CKcu6wzvSYM72FWbt3xEtD7Dd6+HJQ32GAqVH6T6P2ys  
q3WTIw3mQLSKLlIjqPaaX3vVvjSo7tj1g2MfESWxF6oV8aZBKnezZzc1H/ah  
nW3pgmkwEmdRr8FORHvUWW76iqfBK60fsRcYiUhqf2I4j2QajJasUm7SE5HJ  
ytLhRzJpcKrE/FsFHRHIXRvtPKiSBIAl/GD1DwG1ZBokPjucBhV5pd2OVLxG  
ve9g8ZppcAVihc+tUfETufToFVDjUYwXiVkkII1tFkqaQRp0w9VjEnME5PQm  
8ZiKcRpQDLG5ms/U+ipyH861SAOX0Q/FfG+o9cMkPWngSo1HS5/rySMCMp69  
dGnVPQ0S7ke3ifQQkP9DVpdK7zS4JPUtnNJBrZ/E5Y9/AtPAdM/H1oxmAnru  
5FHdeJIG1+/kzBKp/F1VH/dxiEiDX7efXn5H5bfa6t1vrFp8HqfCUvjRQJy

HJFudktOA8PGO6EPiwgorum/EPbUNFCn2fNkVwG1fnySf/llpcFxp5pKBgoB  
fdBfucublWZ6JUJT12QCohP1jHt8juo/7UDAsyQCMpwy+idyMQ1qx/l/h0VT  
+d7efn+4jBpPxEydaAQBZRbLpCVUpsHpW5o8XKKEE1BhWZiRTTfVHTrb8aBAB  
DVmwM03WpcGHhOGSxwEEtCSXMph+LQ28MQ2XfD8C4mRezT10Iw2sOBNN6k8T  
kMpXT8uPrWmQlX2zfZ8PAdk+esmVfycNNs0WaF96EVBpUseFhe404OfqyvXx  
JKBpjXlho8dpslyK8GiqvMPN8f5nfXrsJvOW8FHPi/xMuXJlKA3wVgFvcW/q  
PHq+6mnxPA3oz7Sm/0e173XdS2J7LA3aB3g4Qnyp/Srr1VzjRBo8Z6a7EeVP  
QPWnja85TlH55/pj63ogAQ0YdJ5heJ8GGUF161zBBLQoKqfU9ikN8j6DRB01  
fvZ/5avus2lg41PB5kfNj9I0x22OhTTIvHxj2YGav4iSn5oBK2lwcPJaR0ci  
tX+Fe//l+5UGi1JRkrLUfthuOYE/+Z0GdGOtlU+o/fAvc5e+GE06vH+p+zgm  
h4BSk8nHX7Ongy7zd4Pb5QRE+FLt8oorHc5mBq73U+fpI+O+M2M86ZD+DvHv  
qSeg3Vysec+E06nz7sDaTis1vuri4fsK6XBsIKfwwQB1vj6tt2g0T4cXHTGP  
9WmISEZh8FSddTpkW4UpM1P702Dh9+Bq+3TYuM7L1sVGRKzOKgUVrulQG1Ub  
8oxa3029tpX/eVD19ZXqJEWJ6DgxuqXUJx1iL9Q2ukhS622p63lhUDrsKboY  
aX6IOq9t3n3ID0uHsfl732g1iWjkLs1KtlQ6LPygySFT5y0nyXAvJSkdOhVc  
66eNiahl5rRoGjkdnl2jjUfjyJLkyxlUkY6clyrpGPWRHRu34hVff46pHnS  
vM11liKVmBX3mMJ0kPlrpmzGSp3/0/vClkvSocXN2L/RnYjCdNXIYZeo8d3X  
e3/Pi4i4ah0LgyvSQd4i52v0aSJqZY6vCqxKByatyDcTfkRkE1ze6lebDudb  
j3O8DiCitbGeBz6N6YDmvd9GnyGiIo1Po57N6ZDAzl7WEkREL2klf7rcSYfk  
WXPjj8FExDMYsM8RT4fCcGttD6p8RzFP305B0thPL48mU887FLUcsn6SDirH  
bt0Wo9r7/XtU32IghXrv94xi1PtKXX7ZmA2nQ9Vxbb4hXyLSeMDrdWw0HVLW  
zCPueRPRawmtCKNX6bDYfeAlvQcRxWU7p+m/SYeCm8NS5S7U98tyUhG8SwfG  
CYpLtCMRddpeqdb5lA5rh4Pdz1Lzd7LjYZvWbDqsvmwU6zclor8HZh+pL6RD

Ne6WL2VARGVvkxpeqS+nQtHGn+DL1faT9VWZGeZWkf+aYuJgKEb01Pf5LYT0d  
VGOnJWuoCe1BNPLbVHtPd/IP0CdD8LchdzSO+mQccHUJIWDOk9i24gSdBmQ  
N75t8ICWiFzfvToszpABjfmqQZPU+Xm5TtD+AHsGFFT07bZ7QeVnBqXx1V6q  
nKMn953aLy08f+7kc2eArxUDndN1aj8VH6yj05ABqvKk5lxqvajQqf/tEsmA  
9UaDFD1q/znwscoykpABhGd+63X21P5ZEbf5VTYDYozWHruJU/tH4uzxK4oZ  
EMTpLlC1hzqfna2rnA5lQMQTE6aQBXH0n4CM6TOtDDCwr23Kpe4vGZvFlzNQ  
BkyXEJwHz4qjkEnaNUwvA2R41cpCfcSRQcnrstZjGRBYLftoTEAcKUQargQc  
zwAVPqG6xFUxxG9705BolQFqF9s5A/up++Xes0sXHDPgUQF70Cr1PT65vKZn  
5ZwBYkHjzjHU/fPBiNsFZrcM8JE41S/MLoYu5GpA4ukM0Po1xdJQI4rIgdVF  
agEZcCnszbu4IOp+YMo5/yMoA7JK7xCOHRZFWDR3ziMqA6quify7c08ELaRd  
+Hw0PQPSBces73oeR0OeuzRoz2bA6bf0ZdJjwqhHLzinMycDaiQcru5Gwqil  
5uhh+aIMYPmWMdlEfwDpJKxncF3NgI7YK0tnTgJI6qTH1GBtBkjf+U2be5Uf  
cWkNK6Y3ZsD9lr9HiV/500xGzeTGzQwQj+9KveDKiwrC7WTe9mbA46pgxSzW  
/SjO+n5SyaMMeM12kpFHZh/yUpYfs+jPAM8zspYLulxI88fuhAcj1PPVTXwE  
N070yb/tWd27DDDx46Pvb2BEQ8dExNw/ZcCrXb/yI9MZ0F2pnCiB2Qwo/ene  
cN52N8qZ9TyY+z0DIHgre8Uu/tM57LEvNOxvBhh7DRMoSXM6EtfWPlpKNBi  
3+DSvD0tw9P/oL5nFwUqv+a9U1S4r7MuH/aBIYUCjph01p+uD93tm88t6vgp  
8Kl+YffLpp3u+qb6b8cPUKCo/s8zcX06/OKpFMqaCAXqk1rP7UP0eNxjxR5d  
KQoUMly1Ez7Fgmufy1OYVqOAcFZV3oO3+3A5A58BshYF3DRCa97bcuMHNnR8  
pBEFOKYSy1dwHpy9kZvuuS4FuHjT7Mr4+fAd5+/lUYyU8DiHNaV68ONLHI81  
DxyjQNuPgBTTcWl4+wdlLx+aUaBu4lHLhduC+PPIiFB/SwocXqIXYu0Swnul  
zNj22llgYnKh0qzmAN4yJd5w14ECtNqKwtuhwviVvD8Gricp4ITnhd0XPogX  
6o592H2KAIw7HyfoNBzEyWuNCdc8KLDx+klu1h4RPKyOzGftQ4FljVGedQkR

3NPJqe23HwU+hn4yvvqUsgtuyqVhePkMBHwe7fUXU/wa9TIuGoVR/7mV6++8W  
wVXDP1IWIywNNPmwill0ECdKdlifj6FATJlld9KiMM7zuqBHM4EC4bqV/Q85  
hHGGHN+TH5IpQl475Zr6RwhfR7CRkUqBR4vHXNyvC+JfV3jPy1MoMKn0uEtQ  
XACfrP6hMJ5FAeuImfnYAD6836FvIC6PAiEX0v9yF/Hg7cyXfUQLKfDOLOVq  
5uX9eEN3FF1/MQVEjrbk+Rdw4VniElrc5RRounn4U/cjVtz0R1rDjWsU4BTk  
y1zzWu3WRnl2tL9Bgd4ft1Tnn3zolzNT/fi3lQlpP7PC02y6dFi7PvOZdFKg  
+pTSXC7dus5whl7ml35qvmLeTsr/Yke4pgAhe4gCdzv/O1/+YS+6sbjSo/yc  
mn+9ud8N6vtRgfWVjaQJctwRjkShzXwohT72PHGKAsBG07PVL4BC2y0Vh95R  
oKIdQ5IDQshamOY0/yyVL3VH1n11RNB9x0xLjgUKdHy8949eQRQpnefUol+i  
5jvs7agxtxi6/KxU/M8KBVctenIgtT+x/6+CK4+L+X3iSZfovug+dqutpLuQ  
MR2UDpLkKEmK6JQoRSL6tputvTcJsaRDciWpFEknCUmKpEIIIQn5Pb8/36/9  
PPPMvOc988z8s1j6MI9//Ic298OUyxoN4IBz8cTlr/8wSE+0wDmTzDv7LQf6  
/v6H7ijF9hHLyPtx42ZL14wMPHBpbCh4nAqtX52uNotnYGbS7ptBbENYaNaa  
VzcrA6fLHjae1jOCC9t806/JZOAWzknVzQVGoHamN6ZEIQOd9ybUPVM0hvQX  
IRvyVTJwfuHPNtc4Y/ih8sFZMC8Dy7dXrXx92xhCfXabHdPKwNVz/PzfTRID  
F+O3ymG9DDzRHZrO06eB0720fwnUDDQ30mqIb0eDin+z30fRMvA/m1WGbTY0  
0F7E69o6PwNh9ab+Vi0aMOM1azZYzmBX84rtgV+M4U954blVthn4eKT8cXWp  
MUS8N8tetjAD0yYMrfRWGU0vwfXExUsy0MvVi9P63AhWBC0JsXTKwNScCudo  
TyOoyrnnabQsA4+ef3xkb6khGD32ttVakYEjFy53ykyT/UmmW1vJOwMtDhq8  
kSH8xR8e+Trtl4HXqYarLt0wAltlyZzu0Az807H5g9tWXTh9PvtQe3gGOjBR  
jD700wHZ12oRdyIz0Ji9ouv6bi34uNYYyuMzMEx8l87mFeoQwKowKkzMwA9m  
fdfOtc+F1lYHhdz9xj+vdzONwtRgoXjDVHZqBnor9mrlqKrChaUrho4eycCg  
lZ1DJUPKojb0qCM5g/ARun6j0mMISL+24cauYxnYpEyZPDKsCD/GXudvZ2Wg



r9aw/VUdRQil7WRs4mUgZ4k3d/VRBXi8dXz3mpwMPGMje0RJXQGcTyVtWpGX  
gbkNz9PKXsvD5R5Rt6X5GZi9u6ncsEsedJUyLWwLM1BeksGXeiEP2d5K6qYX  
MIDkv/XU07/IYfq/EzP1yoh9n93lj60VIOqOwSfVigz8W69xqPawAvT9Ke2e  
cy0D99hyP/17qwCe9jb1oIVeP7M1XDW2KkL1rpriyVsZGHD6+5Psb4pAK3Pl  
jt3OQLtVW7705yhBzkj7/qG7GfgloWDkqK8ySOqt3dZ7PwPr9v6SINJVgb0B  
/as62zKw+0JR4ZCIKgzxwY2PczAilixOXnfVcGv85N+zeMMvKohxy6fUo07  
0nvnXHmWgW9UPQ/lKc4Dq2XTP4peZOCC6jfzRxarg1y1bAv3DeEjyulvs14T  
mqMHJpa9zcBtp1MsvWdqQ6rBFcrkaAbqLXj8Jn6NDowfW5sa0J6B/y6Kr18g  
owelTkbLshMZ2Jvon2/crAehE5Mv6n9IYOS3PYNvM/She3OePXUGHTWK/B2j  
yTyTrRwd9kyMjt3uTdkA9WRealnKpUvRcX3Pku2X4qggkqLQsHgOHZ+cTe08  
1jKEm1Zvxj7J0VfmatPrHfWGEPf2mma+Eh1taVwDkQ1GYJKX7uGrRkfGwffG  
gSNG8MZnfaKYBh1rPI0abLcbQ564yflKbTpK9inWuPYaw9rq34/D9enYnhL3  
HoEGsjEdMzQM6Rh7eM68QTYN7hucXtBBo6OfbZH6wGMapPbEbj04n459w1J1  
46lmsJDpnGlpScelwZ9dj7RMYNxj+eYbGzpu3belZmtgAiUTwyN8BzpOWN9p  
/qlgAltLbyi709LRrv575KFvNNAMPjtPLaXj44ymyoIHNHiiHBBb5kLHkFPL  
1s0qJPXfYnYqyI2O6xRS/4XE02B5ynSbvCcdl42nBW9CGvyz6vx1ZyUdK1dv  
Nj0vRYOqt2eM9vjS0Qp1FT50GIPJ6mVpzzfQcc+czK86vsbwRlztcuYmOq6c  
vXplB0lnedXvXi7ZQscNL2wYO7qMQJZybFFBOB1plllbbf2M4H7PpnC/SDqK  
9uhsDVlzglTmAoFELLHPkZT42mcIXye6vu5MoGNXXpedZJwhlJQW6mgl01E2  
OZH+Hg0hJHiv98MU0lp+kDlso2AIGiruyYc00zHXXoKkkgpPWuYVW6fTsaPk  
SZP5DSowUz50D9Pp6JT90WU3kwrLrWvFcph0jFrQ00yxjQr/3mZZebDp2Pz0  
3qd/TlSoygs0/s0jY2t7lGe/LhV2rbbKKs+h42iQWdL8mWRflBCrCc6j4+nu  
eMXF7ynwprpe8V80ganVJf5PKZAXkyR2r2zdDyXH/u6qoECayn7liUU0XH4

P+kVddflvvzcYzetlI6ClN/JpWVvk/mZqnnlRTuJ5WKnYVkyBg85jD5hX6Gja  
eOncdvK7w8/bf5ZW0vFBU4RJGzn/pZRtMn6Tjhutfoy0E30XB29dX1hLx4dX  
M8ttH1AgRMU23b+BjnLzVkNbHwU0WiWuSd2j4wyL7WvWfKTAk5Se19XNdMxs  
+lzC/UOB5e+S1+h00lGk5JWKnbZZyjTVbpPCN/Sd3+0WVDhenCqjX4PHT8r  
/GgVc6HCxzzRCoM+Or6qXrLjmh8VKM+PmFIH6DhvOrSQRfazABXJIsMhww8T  
K59Ve6jAWU3XN35H90kQg+fTyHvJnH2K9pGOWXqD7p4sKsxoZc4z/UJHKcaa  
Jd9zyb4nlc83+07H/p2ZX/3PUiHWmSNvPknHxHPHnRqKqVCUonxswR86Kj66  
GRF7iQovqwWSliIMfP6hPD38Gtk/f85Nsjj4OS9g/anq8h+bn1i2lqKgYIF  
1gbSNVQ4EqOVZDuHgQ0TD8d01VGhvpT0Dzt5Bv77Grh0TT3Zd9/q7XJQZqDO  
h4Gbmgl1UMKUUflw4l4Hh10JmfiW/hwQbhi/WZKCE9vv6e7epkjt34Y2jLgP1  
J50ErFoqPOox2QwUBr5V1DFzq6aClMrF3qXGDDwEfQavrIMBVy/wdzJjoKrn  
TYOVFVRIYF5+5GzBwKdStZ10El95i7W3qw057zb28L8zVBgRr2xe5sDAu6uv  
sDg5VPBLqb7tjgyUm6MrLpd09v+YuxdX+jDwoLHeY2uy7+8sXUzb8WPgWHif  
cTrZf8+8vV+4ej0DOvt6Fy32oUKPgYfumkAG9sT8/RXuTgX54PYTfsEMnP/V  
aB2V6N8tb6WafygDRV0cXdIXET30dHLWhTOW6Y7mpTM2ZJ9XXi07IZKBwx2l  
mcwFVPjk85S+MZaBjxraWjabEj0w14kHxhP+fwdtNDemQmDL89RNiQxk8Hp8  
WqhU4IoH/gnaT/BjDdebBkQPTi8TglMZWPCK2e2XHhVEU4K/bTnCwPe2f2b/  
R+pvYfvg9NYMBibyuzBYh+hhInQ09BgDt7HDBYeJXi9YvQ3bxmJg+/3emg9a  
JP+lHwJ35DAwKLDJkU7wUYMvayLzCR8uSU6G5PuazXEPowoZqDg40vGA408n  
vnnvEXGAgxLzwrCD2TXv2NsWWEf/o8RHN5P4Q5V90cRUMIHn4oE9Zn+Tbj7l2  
9zWin34JHy7x/9Gxvw57qhioXHTczZbEh+KiFon1DHS77vSZR+JPcDpSuq+R  
3PdIfOZyE5LfAxJGyc0MnJNzuPwz4UtrQlo7pZOBN/99VlImfG6U+DUQ+YSB  
C0XtjPaT+stRfXs2oIfow29E854lFZ4aPt3m0cfA6Za3Ke+tqKBof5e2cICB

ZjZ6a95YU8HH7fjHoyEGdoXtqy8j+WKu031J9R0DQy2ffVpqS/jezowT/8jA  
dTv0RIUESyUm237/zEDdAaCUEZyWs+7Wo58MtHYTy1cmeLrK2unSP3L/qoQL  
EcTevudy949JZuLiXfdLG8l933998Nopl4lT72MeDRJ/rKR75TYoZWJpa3KH  
08Ex6s1dbmoET35AOvG/zKSSb6eRiR0vLrHySHyjiwrXU3UycehFpV4yid/Y  
k60hbJcJd4K/rNcyp0JYQOpLUSNyX5fniWQzKhRERJ/5apKjeIv3lmEz4Hk  
wNAB80x0Vzd86k341j7mYftQKhMP1acJrpB8BOQ5jNbaZeKZ8fqJayR/OWWG  
F8sWZWLS3I6N3iTf3TXKsScgE18eFxrFa1BBuUPUmuGcifkv5e7oqVFhdf+X  
H4nLM1Gwkpp9UpEKWZ9eVm33yMTs1fe/jc+hQvfv9mT/lZkYtGrYT1KSCtKy  
t2CZbyY+uxStdKSE1JN28Qwb/0x82Oubv+UXBY6YCxv1N2aimsMhv5yvFLgD  
R/9TCMrEgwve5+iS90Rk1W4PkZBM7DN06hp/RyElm7ffA7LRPFjBtskuyIq  
dXAjtz0qE3+aH1jw/DYFjrJN/W/tysTtMGfBf1cpYJ0/b17Jnkwc89+lueE8  
BWIrJpty9mVi4MCJQLccCpTX/zj13wFyn30ynwed7Dedb7bsPZSJC4anwzfu  
owDt9SNK2NFMdLZQ/RcTToHCGeUlzsxMfBBU68J0ocCgQl6UJTsTPyiY1Rxd  
QAEdfYaFLj8Tq+Z8XBGmToFc522Vf/MyMTdRa+GtjwbQ4+u372N+JvrejArV  
f2IAkludHV8UZqLU63YH32oDYKVp36kqI98f2RP76bABPODOOvpUkYlanSdP  
rggzgNmFU26Ca5n47gxH0me5AaQ3dnfsrsnE/xJOu5eIGUCyePZz8/ZM1F++  
h3c3Wh9EWU0Dzx9motf2dT0j3fWBoT799sjjTOx9zZAc09WHnAVRE729mXjz  
SSgj8qEeVG7wVPrvfSYuL4wWjdTXAyg6rG71KRMddJWPqv7QhXvR1Xr9XzLR  
hG926EOTLjxJo1lYT2bi6Ni8DOVwXfh6UdL7lcQxrJWGtHrUgUSHpX4M6WPI  
76HNqOrRBpG7ewNsZY/h1jL6b9EYbZDtGd6RqXIM6bGRJRyBFpijNqbbU45h  
TMWCLu4jDdjun1qf7XQMt7var/0+oQZjAzfuL1p2DP+eqSyWiVeDvRGfHwy7  
H8Oe+U3MhM+qcCQ1qH+xzzE0eRG4wvG1ChSUOE69DTqG2x49jzlSoQT905PW  
uP8YhjQ6z074LQNrinYVfak8hl9ex2gsDvm6ZP3NDX9Gq49hp87XVIsLH5cE

tTmtHq4jv8ef1yzLHFmy87PC7+dNxzD44JFcWvmTJYftr6y8230M64uqT5pU  
vajNWJF7traXnH94/7lC95varlDDkzdekt8/p0mP33tfm3vQt6Bs5Bjm/eB/  
VGsYr718f/wHf+IY+i8pXW5Jma6tfN7rwZo6hutiF+1ctVukrubDndOM6WMO  
q7RrffjDGXXNctwVByWYGJtyZ8WPvWJ1A+usT4arMnHg2f6eiKRZdSM7NMZD  
1Jm4TT3BqrBYuu5j8ky3TdpM9ObnfzV6NLtu8vTjL6sNmajxLgaaJGXr5N7t  
dl1sx0TzvS62RuIKdcpTAcdtFzFx9Rga7NinUKc+x3VsATDxRGVjyNF3CnW6  
2mYuJs5MDD9X9p+vr2KdoYVyDmU5E23Y3dSiSsU6M+c/H7U9mJjko/tog4pS  
nZXfkNO8lUy8dn07ll00Uh0kXvsg48/Er2+2vZOUVa5zZeSh1EYmjQ7uzeL5  
Kdd55B3hiwYx8e7d09QKnnKdT3nk6J8tTPwpN42WD5Tr/Ov9lv4MY+IMmZ3x  
YylqdYFdjryvO5gYyB5aU2emUhcyRHn/IYqJabs9dyesVqkLn5gDI7vIffT9  
275Eq9RFSf3gDOxhombp2oZ/R1Tq4tT73/buY+J/F6+p7eeq1Cwa3XN8eoCJ  
l7Yn/F2cq1KXAhfZDw8xcVZFsoTqcZW6lz78kZajTFTYdLppIFuljhFyYHEj  
nYkfJSyvXE9RqWPFh7HqmEwMPTKnKGabSp0g3Xu4is3EL3J3v0u4qdTl5dgu  
usp4nrTZa836qrUFZRoZV88zkS/9WIXPmaV6y7UiA8VnWRi4dzo8us1ynXl  
Dz45FJxhosTYD/Xkg8p11waeMvPOMXHRxtmQtEi5rnq8dlBQzMTpl6c2cT4p  
1dWLnbndnX2Si8nT+7YIcpbom1axjmZeZaLdQtISxWKmuzXjv66PXmYiKV0No  
3Yp16teLkxvMrF837NFn2MU63Y6PVf6VkpPsVXdlLBNVrKvukL5YXM9EllP+  
RQWmQp30RsflwY3Ev8TF0gvlFeo2jkS9Um1mYkrb6X/5mfj1JXGnEzvamNju  
we7fNC1X55EpWrrorMROr7Er3F+bj1OWq2bh+7WbikMaWhtA1c+pGz4b1F/Uy  
0XFH8oy8X9J19JpmOZVBjk4KqpJzlaTqetyLnRQNE71RWhb+TJeoM35q6nz4  
PbG3e97vH+/E6po/ZcV//sJE16t+2WKJM+rmJtXlnP/ORPkzG9vXrPhXGy4x  
fj5wkvCt7MxySPldK6mz9nnLP4I37txpuO9brX9pelzqzCzMI5VRuL5/rPa8  
fdVse8ks1EWd43+rh2uX+2hAoWwWpjZ/39KfUI0r6PN6tlExC3H+xjvByJYl

I+EpsQqq5Peo8Sv1aweWHD30uiBFKwvfHWwvWHPqfEnjLSLJDWZZOPpm72GR  
ajFQXvo8X84iC7u+2mcdbJGE0DbpRU3WWTidFBtzdEwaZg5FRVovzsJZvnZr  
/9bIlg70KzSMZjyyM+9w8bP5ADThnwnY2emfhnAuSht/K58HgfOHM5NVZaNZo  
2LLqhAYcXj5l+259Fv7cN/eao1AHGhLqc+9sz8JOXLaOIUMBebFx630RWfgl  
k/34Po0KwSyDjgUxWdh4fdtkxwpDECIO/5e3NwvL5i/MLOAZA/Z6hSYczcjt  
UZtEd62eD3WOz+ebnc3CGnb7ysGz1qB8cq9s5/ksNOQvnEh1tYGdf5U+7y7J  
wvsZ3SHPH21AtW5lxa3LWSj68uSHOBM7iFraaOVZn4UJzNUB4TcdQNP5kv30  
/ix0j7h/ZcOrJRbx4DVX9nUW9r3+8JGeBtAsOjp5eSgLv9faRW4xWgrxdynV  
vz4Qvs5odwzYIbS55jrSp7LQbec07eo+J0hy0+p0QS0b/RcOaj9+7wKdRfr6  
XhrZy0yZlf7RxhUMpepFv2hno9nwZe+0g67Q1Tx1194wG5er1FRGKy4Dmkfs  
8vs22Xgwlfagu/lySCmRMYpwyMzk47+HJuOWwxPpUkk5x2x0HVKRK69cDqlt  
w83+LtmIjn4y+YvdoMcrwHNkdTZKyWxovgXuYH5x0pSxNhvn7Rk73njAHY7I  
COaYb8hG01Pnfv665Q4WDzo79gRno87tV2su2K6AjFXLfcRjsjFIdvXeZZoe  
8PLSG4viuGxs8LmTPeTrATbyhxS892bj2Qh9c7MMDxjovNXFO5CN5ytVJuLG  
PMDe13It5Vg2Nu4WHJe/4AlzFh1MU2Nl45IMhe7Cp54woNdxWZqXTeajixmS  
M7zg2iyNgb/CbNS0PXjCwMQLMr6Gy349kY1v8o9PvvHxgsDnlY5Dp7NR+688  
w3qPF1g2iEU805uNqda/Fv4VeIFese/x1qJslJ6/bdy00gt6Wfn3a0uzEZ5G  
nCzp8oLyxLEfFZeycVxJmrx60QvSgh0phVezMf4xa7fLTG9Y787wFd7lxvC/  
z+Ks1bzBzKInlXErG/ckS8roGHuDyFzDSwduZ6OXvbXZV1tvePpvd3/s3Ww8  
rh5TzUNvKHnbMDv0fjbOlHt45rubN6Q8lFu0ri0bbae3tf/29AbfG5vCPR5m  
Y+8jDwrfyxuMTpcKljzOxl07s7ilK7zhT/qvRotn2UjrWCZm4uINndFu3wxe  
ZKNJ85Hg3w7eU0jP11N7IY0eKzdzpE29IRHerJJ+k43WK96nOc/zBi9Dy5S/  
I9nILrDTySLx6MkeLPsymo2SrgEre957wcSP9t43Y0RfahG/Z7d7QWu/+qxn

49n4TzxJXrnEC07dC7dvncjG5790JLxI84K4i5VhtVPZuL9vSN17gxe48cV4  
FdPZmCEMH1pD8pNFJtLVM1h4WXLxXe+EJ4QYJsgtE2ch9Y+Gp/JhT/BSP3Ue  
JFIYvdC3Kw89wU723hKHWSycN2CouHrKA3RFPz6xnM3CTz0Xv2tc8oDZE4qR  
pjIsvCHze+u7IA+YeL9wJlWOhcVD9T3OzCL66g/01VZg4Z4ue7blpRVw7V55  
s4IKC/uT94+mjbrDqZtPN89WY2Fk1uNOjVR3yLj4Z0JsHgs114XX28m7QyDf  
gzqpycKjl3O3ntFxA/GwkUMvKSycXUyVMJh2hS/rZeb1GLLQ/clppb/xrtDr  
ZVPxyJiF773kUeyLC5TbHH7ZaMbCzIa6qJXjzpBjXLynzpyFgtnjJRH7nOGw  
ZuecKgsWPgSJgzvFnMFFtHtxqQ0LX/y5tbWB6gQ46dpVaMfCqqe+Fd9uIZh8  
jNhxyoGF3dbXZ9esRfj3+KaQ7cjCHfZZHemkv1w4u/Z7gisLxW4rfbCPcYQb  
fmcurlrOwpfdD83dXiyGjvFP24zcWSjf8GEmy2sxDG0/8rzbk4W6Y3EVA2AR  
fjvbySn3ZuETvQlzd1CEG3V8EpfxcL0WbOYTJeFoGd2tc52DQv9u2Xs3AMc  
wKJ/OkFmLfm9TM245ZM9YJaH5bA/yefc125ZR+wh6Mvrs7yNLEzkDAbrLOD  
3Gvy9G9bWLhwyWcZuWBbKA4LdG7bykLXj65sfwVbqFK98LsgjPD5/ebLj/ds  
4Fni0mjfHSys+2JpmOlgAy00TCOTCBaadHvdXzthDR093QMzolioMIGZ+r2S  
9PMlOWsux5Lv719gWKM1GIzdnEOPY6HZTvfDAilrsDot3hQcz8lh4+0Dvo+t  
wGfGSQf5RBb29K3W3hRjBcx7bVoxB1m43s00MbDOEvL2qj1bfoiF5VOKShYC  
Sygz2srSTmMhg/E8dHuMjbTSp0QfpLNw0MR6839US5BYSXtnlkX0cXx7l+VJ  
C1D5F39GjMXCB7v4Aa37LYBSub+xj83CA59mHHkUaAEuius7MvkstL7UJHJZ  
ywJSu9OvjOax8I3cydyrsACy/+uKuHOKhb5uh97OnTaHUw7a1Nx8Fjp4FpTG  
1phDTe514YpCFtYmT9mK2ppDm+eM1XrnSf4ZWzwaxuZD7x8v6V9FLGQl3hQ/  
cG4+/Aoa2n+hliUXrjp3x82YD1LyFnapF1n4n8LGur/nzWBUQ/LndZdYWBOF  
v3qJmxnYGSiFSF5loU3fmeSeRFOie+vktq2a1IN2+2hsEQ2wL6worIaFm9TD  
lz/TpoHcl7pkWB0L9ZuUjYM5xlBW/ej+1jsk38nGqloxRjDM30K+pZX8vvbtb

s6YUFdbbHFoR2MvC3hudHb/+6oAh7VxxQB8LaWXYkp9rtOGHVsusgJdEb2HX  
5JenaAFHUqF1wyALRe7YN+VLa0B7b77HulEWjvkWKNwKUIXch40l/h9Z2Hc2  
nrprqQrsaHwn7T/GQvzYFiE0UQaJcos2v3FSD9PzGm7NU4QnBX6mft9JP1I5  
Hv5XWwEKHImZayZYeLf24m47c3lYeje03eKhX+u+bSZ9s4B2b1Dpav/sLDE  
fn7rv8WzoW+n1JzV0yR/8v7jnZWzoGSzWaSPCBtDGWv6Bj2lINHPp32VKbt7  
xy/q7vsjActXxJutEmOjg+DTumct4qAC0cdWSrDxVH2uutN1MRiyqvnoLcVG  
n9tLZkzdnglXjAa8vKUJfhVUuOyDKKRqil30msPGusj0v000orBKwVjGS5aN  
U1cdD5+9MA00JbyiPOXZKCMqPea4ZAZ8nIrp8FBkY8XZvYkJP0Wg+jN3vocy  
G92GpasFPSJAH7rBXKHKxlSlVZ4vX4vA+ucvPrnPZaN6clsjW3kGGD745+2u  
zsbkcKn33fNg093DMrdNNm41jiry+P3DLh7w03WTZuNlySHhc8uiwKnLCJ6  
uS4bv/nyi14KZkLwmewHy/TZa0ZvlHu2VAzMBVfN11EIP0EGUju/isMfxrMs  
V0M2LqpSYOzZIqmtB3+PuRizcVVFUtUslVlwPF5nlYsJG115I6Y7f0hD+A6X  
S85mbGQ8d8ks+jQH7IK2yzmbs3GIMjee81gWutwuPUQrNu7XZrMzbBRgjsZS  
H1jExuDgGUdehiiDSMd/XRqObFRzdHtoL6sC31I6/X4tYaOu6eDsB1dUoHdw  
y4ZrTmwc7dh/Z+07Vejglbxgu7BRfPmCXcf3qUH98m+bYpaxkRaQl1QnNheK  
So6EmKxgo9HIbMnVs+ZBbmDHkKQnG8N1G+rk0+ZBlqzq9mEvNrofEizy/zkP  
4uOKIvJ92CixVPKdaqc6hFO+fDrgy0axLWtXDtloQEC3Q2yAHxuPWtEGX/A0  
wHlRa7zqejYuib7/+9NyTbD7qPjz2wY2apx0rdx4XBNopwL2PQpg40uxi5KC  
t5ogL/rpwLHNbNSada5HM1ELZl6zFdm5hY2a098eq67WgomwlMNUw9mYwUxy  
avulBf0tcv+Jbmfj3H0TyqNR2tCZvH7WQDgbWzcJwj3OakPj/DOZtTvZuDFk  
lHrnqTaUsK1YidGEn2fqbnlWOnDKJvNRP5aN92VKXvls0gH2j7s86zg2lsxd  
69lwVAcSN6w9PraHjZb2oeJnToQOfuURnsCGw/JJWcof9OBzbUj4v3Eb2d  
nVUoKa0Ly/USC0IPkO/LVL8NGeuC0vvc0t4jbDwY/nbpjmBdkDjxZn5VOhtN

LgUM7Y3ShSkvswp+BhtjzffKb0jShYgK2ms+x9jod8LH5hNXl8xvA7VNXXKH  
7BQNXrMundGhYSGfjUm/JaOPdusCr2/XnUNCNm6lnbz8eUgXknHmfccTbLyc  
fRIPzdSD6HHPFeon2RhiEnL+kZlehBTy2n6eYuN1z2HLTxQ9cjcy7LxSwMbb  
I8/Hnq3QA8fqaF9WIRsH7hQu6tykBwsibzyJOs9Gx9GBgeE4PdDXFlneYGN  
UrK3oufT9UC10/25cQmpr1ebd93K14NZh9kBEmVsLJb7s6fwph78se7tf3OR  
8LuqZtbfx3rwRhgxEOoyGznJAW2DsvrQa71TavdVUt//dG/5LNCHzofh5m7X  
2fhDr630x2p9qjHclvS5io3j3+LSU0/qw5Wzofl3q9k468DdCJsmfSheurVJ  
WMNGm3Wn3G990QdBQrAi1rNx/uWcV/0eBnBMabOD8h2Sf+nZfLckA0i7tCno  
3V02btl+0UG31ABi324sYd1no/8rI6dqeQp4rFvr/PoBG3klySpP31EA60J  
v97JxjniE10/dKlgn+2bRe9i40jzh1v3NICBcn9Vr2U36VdLPzd9aqfCXzuP  
uMP9JN7m/tt3Kw2hQnVpgcFHUq9ROZbnDhvD+StLmn9+YuOJlTaVKTeN4eRK  
x7G2z2w8Fjr4JfqzMTDSFy6K/0b64Sv1gwvW0yBV3yHY/QcbX2hPdnQwaJBQ  
Z5eu+ZONb12ZLdo1NAidsO5qnGLjs8kjtfHqJrCRYzWZ84eN2sGLLru5mcBq  
c0vtqGnSj7Z4u++IMwHYZr5TRZSDT95YrrO5awI2ovNZ72dyMBP8W0vfmYDJ  
KdPKWnEO9gwfeCYzxxTUuo1Ft83ioETH/sr5XqYgG2dkvGg2B91GzqfdDDcF  
MVnDlbIyHOyc3ve67bApTBVT4gdIObg17XSHZ64pfFlmkFspz8GKgfplupdM  
YeS1Xj1DkYPb0/5zs2gwhf4DuiNByhx06snrD0k0hSfzdOZYq3JwyLPk5ak+  
U2i9rmUIOZeDfzw2xLQNm0L9as31L+Zx0NI5TerDD6Zw45N6yiUNDM475STH  
GTOFcvq8wjQtDiq3d8yb+mQKhdS5ret00CjqcObk2HtTyG1Q/WKqx8FXK8Ny  
/AdNgb1JRVXEgIP+B+5KzntmChm/lByfUDIobhH2XrPZFFL4iiEXDDn49vG3  
RSuum4LNnvmhcyVfKvB2eZwqjfvW/T5twcNat/JzGFFPItxE2nzDj4OGY  
Vwch0BTWkKfzheYcXNu4fPq6jSlif3cN4Vpw0EphBm22FInnscaCbCs05v5e  
e2lXtwmYcVua0+04+P2x/MebCSYwGJfPP+zAQcd2zp6TXiYg9E0ISVnEwYIT



Q000FBPwslq5IMmRgyv6H8YenaabqCL1zx7g4EYzbZ/QFzSo+Vq7eRdykEI5  
frOpmgbRj7r4Uc4cHNgsPXQ8jwaUy8Uh01w52Jy0WKItlQbPWakLwpZz0EB+  
wt9tOw2yYtf9CXbnoNatmTJ/VtHA1ce8JdCDg8Oq5pu7F9FgaoG4YL0XB+/U  
wZG7RjSokOsL8VvJwTHvf1cqVGmw7f0VBT4+HDy7eaF+piQNNB7S/3j6clAv  
u1IKp4yhszy4xc2PgyCS8GTNmDGkZ9kLXPYjvq7lq44NGYNjtOzWpeuJngby  
Sxv6jGHce3jB4o0cNBNKcyndxnBhfs0fu0AO9u4umin2yBg2yXBbrII4WKzg  
ZOPdYQyKn3YIzIM5+Gj2mYBPrCbQ3I5bTUKI3v+yKh61GENKmZqFYSjRy+He  
HW8Jtjk29kdvGwfp2bjVabQZw2jEvRatcA4mVuQPBRB7pz3zBPN2crCJVaHE  
7zQGP9PdW1UiOdgSi4evPTEG6dkeFgrRHLz9Yd72oufGUD+q+3dOLOE7T+LX  
xlfGsLf1Z4tUHNGrTmd0zbAxmJU8EljFc5Ahi/+qPhrDa/q5rSJ7OXhEXPf1  
ku/GINix3+JPagfZpxd6OvwxBq8Va/7+3Ef4TfCP54uR/ErNEH4+wMEkn/qX  
ZoTvrP8CW18e5SD1xBbFOyQ/rtuthb3/cfC3XkFcowvJ13Lp0G46Bz/XW7lz  
vUi+DF9bdGUSfSn1t2ispUGYRNxfDiYHVa/tNPfcRAP1kazWlmw01sG5Mtkw  
GnTeCxPeY3MwdqV/8ppIGqSfcwxt4JL8pLg9kthNA8ejSpa1fML3DudhlX00  
GA8d/Vsl5OC3UvmxqBQaFLk2tF47zsGZA8n6fw7TIJCSI6w4Qe4/433zYjoN  
FMViQstOcvAFY9X7GDoNmt8ss7xwmoNqDp7vF2TSIOUw5vTZMxw0dZX+0kuw  
zdlvrafPctDHw98miOD3h1uFJ84RPQ5PfxPzjfqNKXvKSL5XDMzZ4DYP1XT  
sGdVMQen/smffUfu37ehNpRWykHhtdDmSwdo4DdRtWbmRVKvi53uGCbQwJx7  
zbn/nIOKQe89IYGsywqLG9UcPDUyGnNt4SPofZSxfYVDnafKvqqEECDuh1F  
chHXSD37uBy5tJIGORJnp10rOVh773pWBdJg99lTn7SrOCjb7NQmbkmDlZjb  
N3mTg9F6jt9P69DAuJ/f1nWLGw0nLt+NmUODmUns6rJaDraKaHwP+2kML1WZ  
xem3ORipXrx094AxcH2O/LfoLgc/cUBBUGYM0Z807IW+R/JztG02M9sY3Bnj  
YWNNHBTxy5AOijWG6btXlgWtHKwqoGfOMDeGcPst/2Z1cdCCU+ShVGIES7Qh

4fkA6c+VmTEdJYYw99bCbVcHORj+wZ05IWkI4+ts1zKHSDza9mW7ogzhAtvM  
2ukdB/c80yz0sjQERXGNzxc+E/9+rNinWUuFj2dUXx7+ykGv1LaTImeocB8U  
OwK/cdCwaqeF11Eq7E+cVSr/k4Oh6Yn+xquo8PbDz22J08SeiOzZAPL+3sn4  
ttZXhItL1t20HXxIgtzqZ1czUS6+mhVz9tMNCvhuHtEfEOfi0+cxTWfoFDD7  
81qhWpKL3/QnulfvpoDk8X4R3iwu2ur8TeVokBN15OXbjcvJEx03jEmgKC  
mM4OPTkuFukBa0qHArvmtNf8lueizr0YvDyHAobL7+ZeUuaiVZr5AuV3BjDj  
TR2drsrFPS0Tzfe7DaDvYHXi1rlcvLjLbItZkwGwb172V9Pk4val/i5qRQZg  
knv041xtLmqPP9VJFBpAY9KGw+q6XEwQWbOvOsMaggLmz9XU52IKT2V6kMwn  
k4tnlGtRuOjQExY4EWUAHM2nLjqGXCz+ken8a4sBmP298FzXmIvPVDuDvvvgb  
QFP//hh9Ey7eC0vaPOBIAMF1PuIUMy4mzkn83uFiAFOnKCe05lz8YaN/v3ax  
AfaOTloYWXARZ1UwrkYgHlwe50xFreDrjZ+qDQ3gGbMDzSx4eKaTRdyWmgG  
EKIXP25qx0Wq5dmlX6kG8GeGe8Z8B3L/+r9ZVgYGIBjU0F6wilSX09M2HD0D  
WHD381ULRy5+8fzySpng5rN3V1gBsR8xD24THHJE+MoauViffucvn5z/Exqx  
x9aZi/OarTtOGhJ7y5b0tnfIYvSG6xtfmBiAhaHSGYflXGwMzfZbY2EARjv  
7Ra5k/woS++QtjeA0LfV7Ys9uHiEHbVcfKkBTN/PClnixcWfEqIn3N0NI0dC  
yCSsJPyeklN57msAVnS7LPThoubhlyG3ggygfYc0xdmXi90vKq2+RxjANo+X  
N138uHj56YBVBsmHiOmVVcv8uXjleKHCfoYB5M5OH16+not9qz00PDlhAB3t  
8xU8Aomelgdeu3eHnL84o8gziOhJUCzEHnl+66mjdZAXfTsjHjz4SM5HF3et  
DOGiY/YDl1v/DMBm1YFwn1Au7hroqJJVoMCDBaunV2/j4kRn2NgjXQqEy1N5  
a8KJf1GcczILKCD6dZK2dicX1RpXnW5dTOrhUftt/0gu3h04nqfgRgG7K/lr  
10dzcbAzMuiDDwU60fEfNsRycf+ZxnPBgyiwc7f7oYA4Lh7ffNI6KZgCYn6a  
apviueg891szbqPAKZsvZUF7uXiwp8GwdicFHFQanYMTubj+orjsZBQFun4I  
e7YkEX/OVi+diqFARHde9Nb9XJzR0re/PZbYu7FULCyF3E8LT08g+JRQKXdb

KhcPPV6vJUa+d0h8uyD8MBdHukpEkyOjvfw37u04wsW5tht/DoVTIHJhdkBE  
Ohf1JbfWeIRSQEJ969fIDC5K+zcoXg+iQP6U3X/RDC72mu+6ZbaeAoteSGvF  
HiPxnIpOqCbxPrn18squLC76XLkuud2dAtF5V9x3s7gomeA8f/FSCkgdSH8Z  
z+Fi0y/54qW2FCjYtDF+L4+LAjctxwMmFHAec+lEAYk/amvRH20KdGuL5u/L  
4SIj8VVpkyIFZg0Ut+3P46JZ3I4jmyYN4HyJtfieU6T+LJ7pHBw1AOc9tRCV  
z0XL66eSlPoMYL/0o8ubCrmYZ/WRdb3WAL7YTAqhjPSLifXW95MNole+PFSk  
huhzw8KRzaP6sMev8+RkLRdNBeIZ2c/0QVFfn47Mvt714mvpld2WjPnhdi/J4  
fZeL6sGPvGaf1ofbL3kWd9q4qLso70eVnz4EFmvvr07g4q2Z1i8YzvwufvC  
2SsPuXhum4ePwElfrGbVqJ59zMU4jbLZyTL6cN76zZ+0F0Rv9krVW9v0wGU6  
0m5/P6m/O+myo7f0YKB5lib+Fek/Zv32H8v0QD11+k3oGy6evfvG9ChLD24Y  
8zQ3DXNx5uGP/5ml6YHfNy3/tW+5GOpCfxG7Vw+yMixbln3gYvj4gmNfg/TA  
dM0tUfjExdJdnCTw04NmrWWOdp+5aK62KG2Fhx6EvXuwx/wrFxtMH4+pO+mB  
6NX1lwy/cdF6cpbELQc9OH1g8J32Dy4u5FTOmmtJ9IX3SH21n1xMH/BeNdNE  
D3oUJwLkfnFx76D79iQDPdjTf5Av+Zv0v2Fr6f1aeqB4YdbDf3+4001w4ovE  
XD0oj+NKTU6T87TZj+eR/dhziZbzFxEeHhSX33lVVg/eSRYlvxPl4YC6XXSX  
tB4c7bK4PiDGw/wbs3L2SJJ9+GT1WI8ED6/Q1PJPiOnB7e2uxo+keDjn9ii4  
iOpBoNWDLS3SPCy8Jz8/QkQPfv1Zd6JhDg+jM1UMFP/pguD+6yc3ZXkYHHT0  
ud20LlhzImSvyPMw5thHqZ6/utAZ+M0tRJGHRK3PdnwnOMro4KECZR7etOy6  
xiDfS49L3cpV5eEr1x0Fx4m9ohrOd85cHk6MGn/QmaEHrv9pmmeq8/DHrpNu  
mjP1QEKujb5Fk4fKi/52bhYn/Av2Ddtr8/DAPNE3SSk9YGgb08nq8vDop1WF  
SrP1wOt8d96QHg8PbyjqPUT4kDU/OlltwM02/cHHVivqQed1az82lYc3hBcv  
HVLVgzX3WLOBxsP26+0G/3T0QNI76XZlUx6eXThziwdVD7qffLozasbDxErB  
u68kXxuHPJKEFiTevJOXVtvrgWbkr6dRVjyE9D0vJEEPXn4rsnS14eHWnbtN

VJfpQchM8fdf7HkoaVAibU/0Q8m86np/IQ+tEt0y3AL1YEQxJP/kYh7KtDye  
URaqBzv1b6/zWMPDk82HGyKJHnc57Ws6u5yHkdsqgyt06oFVi5F+kjsPUwo8  
Sl0u6MF3n+4DPh48/Nm3+az+VT1IDL2/evNw50ru+Nvt+hB6sFPZ/3X8rDR  
LI6xbkoPnCXz/pmtI/kLY5qbSuqDWLZHwMwNPFQ4fcvSWVkfMk4VKVYEEEn/U  
1M3tFuhDdu2WQ7NCefhMP+jj3HB9OPX7aVBNHPHnx9TowJA+BKcdqebE87Bv  
+503UT/0QX+2teqOvTxsHhg6P1+C9Bt1VodKEg8j3u52dTI2gIsLPRxjDvHQ  
a3XL6lloA6hJqJunz+Khk3rTOQMRCixxWaapy+Eh/teY9I30rZrZdm1tHg9b  
Fp5bu51Kgfppzw3Uc3g47fZpz8IVFLj3+Pt8xXweFnyvfjB8jALLTydbyBfw  
ULBvBIPzKNC8U9RatpCHxj9u7BwupUDrDHkH6Qs8PHSBaLXl/++XqbNoBQ/H  
Pxl5as6gwqrf111FrvBwoUL65ykZKnQ2ObhNX+Wh/stlE3vVqdC1abnX1A0e  
Bri15iyzoslaWsfKyZs8/PxwOli4hApPvq9ZPXGLhyU98R+OuFPhWeYW//Hb  
PNR2Ec+33ESF9everf/SwENVdvbE521U6NWPCRI7y8Pb9ovD3WOp0Hdzf/Do  
fR5ytnf/uHeICpuOztz6roWH4v22MEqnwksfRthIG7Gfjpg6z6bCwFvhzsGH  
JH9LFhu/002FLVe1owYeEfuOn+9FnKfCYMq5mJePefjE9YhFehkVtnqYxfU9  
Jfnwtpq2u0KFIZWr8b3PCJ+elvc03KBC2OuFCT3PeXjR7qbGxhoqjJTV7+t+  
wcPcmaI5bfVUCE902/+kn4fvL7h0PmqkwnuXByldr0g9aVZujGymwk65tYc6  
X/PQaC27I7eNzN09L9IevOHhJneZ24EPqBB1PiS9fZiHez9uuXe5kwpju95n  
tL4l+bK/v/d4FxFvilsRmNr8n/UFnzw6lJ1T4IvWT2fSBh3EnzlrrPKXCricH  
WI2fSP3lMyJqCB4/Lca985mHU5SQolGCd0dk8uu/8tBaJ+RAMcHf7RRz6r7x  
cPHRO2mTxN4e0e05NT94aOt9y+fZYypMdOicrP5J9Bd1JGkZuT/h+PnTVb+I  
Pl6sFToT/yZD5xdU/uahWtb2JQ86qJBkca3w2l+ih+Svou9aqfD796KiK/94  
2JRjimpJ9n+wH9xuKK2bwkdrvvazxLhWmOe5l5TP5uAlYY0dvU+Fg0MPyMnE+  
cq+YyD+ppoKlif/lEkk+vluwFsuvU+HQj76rF2bx8UCZm4pyBRVEG7ZWnp/N

xzjtRVTxEiqIrd91q0COj5K3plf+l0eFkgHNgRQFPi7N/VV8nE8Fnx3NYgFK  
fDy97MBj1ywwq5CXprFRS4+NTj86FoSIUcJ7ZFvd5Lh9LViS2PttDhXeZe4Vt  
6nwsDNr4aDCSCjYnOwbStlI9IZT3tRuIPqn7xIN1+fjYRS/2Otl3UsspJo76  
fDyoJcb9vowK7beTd3+n8vFSmunkdmuin0GaRNh8Pub9se8RU6TCnlinJk4L  
+HhF5kFxdQVrnXLXaVlyce9EY7fNGcSfsR6cp7a8HH6TTF/4w8KFDLTai/b  
8dFttOz00BgFPFQXDDId+OikzJK7TvYrgVG66XJHPnqUTFcY9JP5p8LSRx/4  
+GpG1vPbzygw6NAfP72UjyZ+4q0nuyhg7mFTV+nCx0+3r5aok3p/0vVqkLOM  
j+8bx6JvNFIgKSBTMsaNj2dPzDvLrqdAU+Sgj5EnHzfwl8+cqiLz3Q/mnpne  
fOw56zUz/ToFFFMW5r5ayUetAA8NzysUqJIYrrvlQ+xVONm6X6JAUDbrjdCX  
j39zbRbvLyPz5VxHqXg/8r0cVW2kmAll+W/NfPz5OGumytUjRRTwoXFXm63n  
Y1qkxC//cxT4eRn2Sm3ko5fT766As2QeXTSaOxTAR60EHyacMxRwvcu/Xb+J  
j89m/hydPE2BUU+nobzNfNTsn/E36xQFWE8+Su3bwseqSTXPNSfjflOpZ/7a  
rXyM8lp825X0w75hF1/LMOJfR5RLyAkKHI7+vFdmO////z/ZUJLAEOfuSfe  
h/PxqqUURYvgeKnxoTORRJ+PjhyTj5P+O2+F+cZYPpYFrni5m+BtBd997eL4  
uF1EK6KI4Dmm+QmK8Xyckyq3fprgK1c988b28DHgkX52ArG33vFnfWsCH1VH  
108pkPunGwuGz+/j47/bV9PaCS70Ximdlkz4drdVOU/89ej+Zb75AB+3Jr3K  
OUni+Rj0bs3ig3zc4nFt8jKJV/DWJ1HtEB/55de1BwkfjF/8r4d5uPtvOHv  
ZoQv+qE1I6XpfBQZ69kgW0gBq+/XylMy+KgNsexcwnffNtWE1Qw+smntbo4k  
H+ZezyV/MvlyEWk4r6aEzPuqm2nOfD4efnHtAovkO5le/1VZyMfPSxosyq5R  
gPJHr/ptDtFb7GKpp5UUSHg95MHM4+OKlx1Mj1sU0CzbGdlzltTf3FveF4je  
7mm325Sel/5bppcq3CfzPnv+3wNfFLRbGU5LjfqS3/uFaVDKxx/mTVHhDygQ  
5rT3UvQV0g8aHXav6KFAefehcbEGPs78m+QS/oEC61a8qX52h48Yld934RMF  
RGpc00oa+VjtscD+5WcK+J6RVPZp5uOZt/1zDb5T4LfSjj79Vj6afzfiWUwQ

vtNbC3+08dFGyuKm+STRXwTT9sRDPn4YePBu8jfZX16O/Y16ROyNZ7+985fk  
Y7VPEz4m9Xh+a+K+fxT4dvdyltJTPsrqb+ZrkPcz05p3Ug36QfHhA4XRKmw  
rDhe52YPHyvn6Adqi5F+r9H9NrOX8NusNLVfnArCLPuKoD7iz9tDc+5KUAFn  
HE+0fMnHuqxDzM+S5H3ZPYViA3z8MmyUMGMWFTgjAbOevebjGiXG3Z8EL95Q  
+6j4DeknS2ojH5H+MtSmnbt/mPTDe6KbmbOpwITUkFVv+Zi0JlXOeA4V7C6/  
NtF/z8e7Ly035hM8YODy7fsoH3vFVfV+EkwXFN66/5GPh7a3yM4n739f8nav  
qC98PLr2KHchweZbTPoVv5PvT8lQ2sn3zx5nnhv+wceiuNT8HQSnLv8UVfWT  
j8cWPhwfffbq60y/zFR0+O22sfgrtMK6Y3/ebjOQ17qzzi76LB91Hr//Kx  
5ZbLRDWJ52yOQb/vP1JPTYq9aqRI/1y1yct7hgDjlj6yOkP4iBcX3nKbKcC+  
7sfndhK++m51mjiLCzAn/l/BPMKna5x0rqOkAAXjPKNLpL+qvDqQaDlbgDo/  
RWYIIRI4d94ayojwGzLDU0D0xQY8fzqbygnwFnXtL3VSX4rq0JtNZQE+Hry  
e6PPL1KvHM9xMQ0B8tePyL/9QvTpfntLP00BNhXXXz5H+jPtX13nL20BZinK  
3fT/SIGpCKtLY/oCvMSZ/YX7lgInls2L7DERYKHBiSsC0q9fTo4Mly4S4LvF  
j/VPNJN57ZLu2v00AvyxY03riXsUuBS2sTEfBFjZu77X7y4FUrs6CvjOxp+a  
d7EadRTQK7u2+aCHAEW0Or8Zu0oBRsjYg31eAjQSHzVOvEyB8bnGEL9SgNzZ  
6tzZpB/fOXpCc4evAP8qqrX6kXo03Xz4ue9GAdIH8/Ycl/2hXaXG3TtQgBiR  
zzlM+odt+48bbkECbFlhXccg/UZi4Q6BY4gA58ZK2z0l/Sz6c4G4fagA70R0  
7p+XQ4Fn5/riLbcjUJxKu79bQIELij5rDHcSfx0EAdFcCsi300/oRgrw+TKz  
fHkOBfYdvGupES3Ab4nr+9tZ5L2y/ZuvEivAzaUB8oXZpL4+2snLxwlQ/sZe  
02EW6Z8FsQel4wX4c8+oVxGTAuobSsbE9gpQ4s5Pn6dk3j0sN7TpX4IAzfe8  
WqpP8Id7Wh2/9glwy45B1exMCujyhIqBh4i/VTGreAwK+IcorK/LIP4ObnYV  
kt/fPI15L2A1cOmkd/l8cj52xYOkmGMCXOv9fPItwdM1ZnPcswTon9L0tYnc  
n2mReVKXJUBP495tbcS/uYXvzX+xBejyrocc6Qfw/r+Ze/4grQI+A//64sSlg

nXl+dQlfgJHaJVUNJP76abE3h4Ukvw/EjUN5FFgZtzU+4LgAbWdtnmtB+Hsx  
3CBuc0KA33cmrTMk/IZv0BX00Unyzda86kbej4n2FOPhUwIMnyv9i0fehzTs  
v1mbL0CbU5I/ZUn+5K8t9hQUcDD+9vOkSpJf0xOTUW7nBZjqLuvJjv29Snb  
P50LAgwd/WXVRPSw/PB11mSxAMdOtD8zLadA8I64q8UXBRg0Vlewi7z3AvuP  
k70vEz71Ttq+Jv2bUurBGKoU4G+7ns3DRL+XtYs1aqsECCaaCyfbiZ7Et0F0  
jQAv/rTWcXtKgRlPXqV13iXxrepp2jNC5onYx7L8LgE++ZX3aS+pf6fiaor2  
F2IvLWhkth8Vqk5Lls0fF6DYmfcLZpH5y0LgZ73kuwCdumKc/2z6//9jjTkF  
ThJ9FAnbbm+nwlSg/uZcESGWcPaX5yeR+XhNzEixqBDvtEimWhwk892Kmqib  
YkLMTx00K0+jQred//4eKSHu01uhF30MzGPYj00qCkI0tXt24wOZJ2mSz3QN  
IYQoMiRe+CCfCvl/DS7YqgjR4kDPAWEhFbJGayv95gkxuog781kpFcRfS00o  
hhBD1ihc87xE5t9n6+7t1hLift1NAQVkv4ho/PqYoyfEr2vowq9VZB+phoAC  
A2Lv6bTFu1tU2Hg5c/AylZy/GNlaU0eFR0U9OxqMhDixQ2tbdAMV3E9Rv3bS  
hLglJ0DiD5mnb/PiEgdMhajatOtiaBPp55m3/32eL8SM1JJNRWT/oCRukJWz  
EmLEo4uDle1UOBF9nq9tI8SGwz11h8j+oRj2TdPcivAxcBNIn8z39AAsX0lg  
xMTqv0U5j8g87ss09V4kxNoAg9uD/98H3HuvBDok8fX2PZ//kX1hDIwWRYIQ  
10fC4s9kn9hmG9+QjELkTjQXXiL7Rr9pg3umsxAleJvNsZvMx3MD1pUsF2IQ  
vCjpILha/EdYi4cQv3eL380m2PKP06ceLyHaadvL6RN8YTwr/t1KIW5usaan  
EHs671/8/ukjxDdhy60LyX2CV8ZpkmuEaHvophyH+CPTvUdaba0Qmy4803Uj  
/h5pv8M2XCfE2Ts/hN8h8f2+IzfpboMQ9/guHRV9SIW4m4H5ywKEmPBZq0iS  
7DPvLxUbrd0kxCMPHp15SPaZ4PMT5aGbhSh74FzfBsLnszwXu/gtQqRnvNlw  
7h4VVnJZtWlhbhg9pVvj8h0q3KP3u3LDhKjxsZmyn+w3jqkm7QXbhTh3s3iC  
ONkfTalaexsihHidkS6y6hoVzmxVCHkUJUTHoGBHGblfzN0Y9H4gRojdkeWt  
R4meWD6lsV92CTF1UxjjNtlfjd0mf/7bLcS3iYYdZgVU+B+y/1yf

"}},

{RGBColor[0.880722, 0.611041, 0.142051], AbsoluteThickness[1.6], Opacity[1.],  
LineBox[CompressedData["

1:eJwV1Xk4lGsfB3BHlkoHcYhCTkWWENkjX1myjWWYQbayN7Z50FCWFlkiGYpJ  
C6EskVIII15RUqLQoiKQllClqe5/3jvp7r89d9Pb/le//rHUb14+bi4moh  
z/+ /BtOd3wkhLiOu5qj2q40mRv0ZQ9e/sfqMnrLEi0J6NuDQE+mICtaY0WSF  
iNhiugbaB/WcTrB+GVWJjCxTmzdG2o3H10UZ3Dg/6tOctc4c18LDdT5I8IH6  
2n7ZkpQV5qYem8ay/oZtyMS51f32SHetH7qUJQzRzoC+2WtU5NcLlgkwRJAq  
bfnuK+GEhwfq1bolxKF57ufoYKszBH4KGkaypNHNdj7v1+cBqd2+XD2U9ehV  
4HHSNvHCmr7eDxezZOER9jDuru0eKBpqX0ZnbEDD61algDN7oTHWy3ebthFC  
4lOtFlre2H4hOTDUeBMidbzcXj95g/KrV/mNhDzk6Ubja8Z9QL+anJ7Csxnc  
fDNG56J84eWhMbF9cjNsytkrS5Z8QdxNvIH4WBFvODvXjCz4ITtOQ4/JUkHS  
Jig3PwpAnkrf2Y3eqmh6LpRirhqI4r7kpbCUNdR7h//jdDoQvXnj/XlZWzH8  
Oj0ggB4PA7MP2dHL1THvEv+2+8Y+DNnmGlPj1aFalnFk8yoGxn+bFPEyNPCL  
8mZseS0DU3RjP/5+Dbjgd05TviDMVY7z1NO2QWlfxfiTuxC4vHL9g4014fuu  
edJvJAgI98YVX0toozvh05GJH8EQX/PoXcVJbayVPpzA3haCdWG5aUk80mim  
SXX8GxaCTetNx/QmdZCk/C2INhAchSjJPFf/XfSW3Y9eIx4KlfZx27EeXSwR  
Y/tXWIVC+1Du9YuP9c4Mt1SWxEK/c7QvQcN9cF4phWf3hMKIzVTEaeb+ghv  
Emh5ujwMFv3jEzf522Hj1Zl60zMMu41MdUJZhrCTC22IWQiDarJSnvqsIb7n  
Sb3/IsQEd7sw74/903Bii+pNlw1MHv2vYrZbwS7BUqGghkTh4sf6hn9MEKc  
zJG6UzQmlOac7I/oA8fLg7o8/Jj4vWP7LdMG40Ogq7JcAhPD3pUM+Z+AgIja  
CpVMJl4l/SuzXN8Ysdz5A6V5TJQ85098Wm8M6TtNp4XqmLD37KBS63fChUdr  
n/gQE/pHd/FpLuzEnC7d0GCCiU3FDfVieiaQE75uMD/PxMLYRdnuOhNM6jR9  
ggCBwdX/dDTMm+Dss4+5HaIEnmslJ5/XNUWsiZu6SopAYVzIuFedKVLXxS9F



KBM4UTBQYDxvClfKcp4rGgRYzY60jbpm2Jm3QYytR8D6b/07n2+Z4WMna4Bl  
TkBb/WrYkzklM4odMXaEJClyW68omMOBfMkK0MqgZnzfKkht8xRR9/4atad  
wPv7Bwzt5sxxQ+flvpm9BJ4MfpvcqrMLxfHdaTX+BC5see08U7sLDIKHU1LD  
CKTYmwu8nd2FYck008IIAuGR9Y23tC3w5GUXIzGKgPmdfLmYWgtYal9K18QT  
2Dog0u0+awHT/1J4eI8SWMuTdGKHtiWYIC6VzYkEeBQWjGRZltB+PalrnUJg  
wj4+q9aSwRXUi8MpxJ4F9Zf/OmHJcJrplpT0wk80kXd3axlhcuNZe98bAJn  
enSbUmqs0EWJ0U85TeDon/Jlxg8rJHz19juVQyB443oFGy1r2BQ++BlzhgB9  
V1aPyn5rvDxzQNvkLAHjIN4MoRprxAVYYvQcgS0Z0Tu/z1gjcVWTYvgFAuI3  
v/54pWkDJ0WHZb15BLg6PcuqI23QnunXp3CRw0jPl+451Tbwud/a6FpAoEPG  
TDh6xgZov58dVkgicWfdQ1dNCgKLb9sEFREo9Ve02h5JQZeK2nPKJQJZqXlK  
0tUUhHVb/CVxmUBs5er3v6cpKDIRr2sl7f/qWObANluwxTzv+BcTsJ+dM30Q  
YYsk+qf0b6S3rw2aL7ppi0uVva89Ssj6fNw/aTlhC8WS+aFq0jblh4cnl0wg  
NLi18SfpNxPfa9n+dvCn3xxRKYXgaZDTtb3QDoYTXt+cSH/hKXjxoc80H26J  
hDBI132mDT5cZY8xo/I2JuklK7eBHCv7XE020xll2vjant59FvZgDR5TppJ0  
EvXvMvC3x/cLE9KqpFujgjqEjtnj7rLcriXyfsFe5ouPBfa4EzX9qJE0Fay2  
mnv2mFCusI4knXmp5klKnz1cqcw30qR7lh955LZoj6WlhZbb5P/KhiTdV5V0  
wDtr+RRb0r4v0+78peOAKBYxxluyXqVamXUdTg5o9eptcSQ9lptTXRLuAJFP  
6X89JuvN8i6ooFQ6Q0iNJIVN9qPhv+JS2TYH6HoE/PpM9uu3UsWl6REHnNt6  
/z9N0snTtedz5ah4fPhoRy3Z7zbn02eCTah4q/2l6Gs+AWeyF4z2UjG/4FAi  
QfrMsbYTQ+epUJ+ZdXQn5+eK2MdY9X8cMccb9pGdS2D8wJdoHg1HbNNgiZ4k  
53Hb+2+RnXaOsI2TpSRyCNwpnguOS3NEkdpcvnc2gWc6f3u0cDuBZr1nqo+c  
90lXXc09353wYNfS8cUkApqNhnqaQjQ4LOZdu0ru04ENJlr8KjQISj1wcz9G  
gPsrReVqIA3H2vmarh0hIbrrI73QTONGvmOjeiyZF3knf7Gf03FTs1umjkmg

vHBK8/IXOoRsfumZk/suW0IPFljhjGVVKoxXIIQQErsv0JJo4I4LrntUQg8BA  
U2XdwTpn+JRW/TfrSyB16HmEb6ELXB5aNHe4kPmyRWhUh7Ubfffy+1qMyPm4  
nfH2vbQnuKxUyjasIvdn1G75IK8PHINUWmTOMfHT+NW4VL0/1LrmXdO2MZG6  
pjex6DYD5YG0e2tPhEFruj6FKA+F5W3i2K2GUPitOj7aROYkX+lij/VSCJjv  
54cJxQgcHH8YwEO+Z2Fv5FaZ8u7HtdqanoGYMS2GwzVd7JAJMY+vtEWhJYU  
Ts7bl9GofqHm6i0ahJUB14LFrhyEQW6/3GsGA2k8AusWy2IRcMFM627dPqy9  
bH/o2MV4NPbuHYwW3AfbGkWeM/qHQetx8yqOCMS1uTbNjt0j+Fm4w266PQCp  
bc+jFuW0wrWj/gbv9gDwHpmSX7E5Abol8qn3L/iDX0egKnDjMZhZFGt68vsj  
4dBRsrdglkasVzZfivdDfsk6urRgEgo3z1WuH/eFlrcoEb6UBI0rJ+PyGL6g  
ynAFSH50xq+Vf3I6vvlAqEGw5dSnFFgNSaxvDfCB+XCM4foXx/FtPOnyo3Fv  
SM+ulll/kYriljKV8VBvxPBmdKu2pSFzle5X9cxeOJYQJZO1J2DhwGnOSNyL  
pwqsD4k16RCU21MqLLwXjQbdKluKTqJL0Oaq4uU90KGq0zadyIAkt//Alx17  
UFpEm4kyZeP4rX+5icteCP9ivMu/gY0zrd1llwY8sWqdkf00/UxkjuZy3RT2  
xCd00Me8qkyMuh0ciXL0QHy2iHepfBYeRUv2sPLcMXK0IXPuchZ81E+7CvW7  
Ib0+ir5G6hSGqspoE1vdsGKg7Gns+VOITIDduuLAbpgmS6mmrT0No6c+ejot  
rmTONEpuYJ/G9QjrGgdFV/C4ELcLhbJxjrlTzOGwC44fcxcnpSNQ0fr2Kmf  
nfFK+fpvj8VshBfML4Y7OuNrs/SzhQM5SC6W6ey5RYdxWcMmmckcOF5cGHZS  
oqMun79CZSoH0l3bugc307E1x2mb4UwOapJXC+6Xo0MmYdzYfT4HfXq5Zjmy  
dPx03+B1louDkt38X3vE6bghnJorvpoDE9HW5ZHL6NgU7SoopMFBzXEzt85e  
Gs6FFmflaHLA88L9Zdg7GkT8pqVUtTmgjMqnLe+igYuarkzR58AuqaZF/zUN  
fcpNFmk7ObjfNkiUttCQ06+QwO/IwUGJtYHxtTT8/Xb/yjU0Dv7odlmtqyZz  
oe1BprwzB1ndL/jqqmgIr3e/aObGwb6TjjemKmiwPcW+m+DDQZxam2pQE3N  
x/tMT/lxIPki7ceKAhoMDiu1FQZw0N5i+ac0jwalkEfvmoI4WFFd2PMll4YC

n9XeL0M4cDirWpnMoUFit+fIQBgHOs1nH270poFtX86cJDjouNe/7kkWDfy7

5uf+RHAgSnKuNpBNw/8AgVb0Fg==

"[]},

{RGBColor[0.560181, 0.691569, 0.194885], AbsoluteThickness[1.6], Opacity[1.],  
LineBox[CompressedData["

1:e]wVx3k41IkDx/FhSSGKknIU62ga5J6Q5oP5IY9zRuPI0aoocgzNOAbjWzly

H8u3Q1hKxKIt1ehaW6ktpQMlphQ6bA1L66i02++P9/N+Xjphsazd0hQKJel7

///m6ad/c5UpDArNZVkuSWW8LBpr+8AXM2jNzDvxunIQ3tFKa0Z/ZLiVsy+9

2a2GnlEb33z+AqPH58tFZUMDzE7dZqbyl0IxbHH+iklLFASixk6WLSOI5AFV

x460apFSo0KkCk4ZVVvV82xwI1m0cUBdDe3njM7RLttD4bOS/X6+FiapdObw

XUdoBu6iDHqsxY3l1wr1252wSjz0qqZ0HVZY0JCLjjBtTc/JRepi1rDPGq4

pzM8FoZofeoGCNJKGh7dvxWcX7MLcmQMMd03fpVt5obQYPMJu0lDyCq3Dva8

cwP3avZvtbepsLZcUCne6o7yNH0bOL4xrrTxDBz6PVFILD72Y5gJeoOert8U

64V6cfbXfo+NGDR1bjCW9sZQleRIVakpInp72x+WeEPyzalONtIc10ue/HS6

0gdTnNW+L1+aY2N61cjeQR/MtkhkRNss8MA8a8dZdRYooUfD9zIYwnPP2IeF

QhZUrkuoT9St0bjdm9UVxYbaqpvPmwutcf+Rc+H7ajY0Yo/mZcnQsZ1hVPz2

MRt6a5kfbSbpiL57i0la+cJaeLSt5rYNttc3FFyU+CKQwaTH801xqN0u54w1

BybZG6rMZuyxSeacPieUA+meZbL/8LZgqYqjnkU2B00h4scCHgMJeTINJ3o5

+LbF7iKzA7ic3L9xPNwP3iG9LJbIEa7PWedCYvxhe8BlkeW8Iyy+pmVP5/tD

r75DtNLGCU9njHctb/LH/MeadQOXnDCX3zIw0+aP2rRoSeglJugr5QeecQLw

qXJRbvRFZ7gMhch1GQbixe/J9l6zzuh6EFyejUDcGf0waUp3wcWa8x4yAYE4

YfTE79MFF7B1A0w3HQ6E85VqfcEFV5w30tG69SYQRwY3dea0u6HHfX5e7ch2

2K2JmqS754mA0tuX7oqDcPM1b3LrhCeYQ9N/j00Ewb0p493EBi+0t0ju+CAV

jJDNFc/sar0wGXTL/ap+MBxadwztdfWGfZlZlXBfMHY9yrsiRfcBc6K7c3Ym  
GGdWvk41W8FGX0ysbJZ0KKyrCheKH3DASEu2tyR2IOtyUf8LrRCcpJyp7vop  
DOPjXotHZXeitl9gh24C58dHks0ReHgS5eEjOqFI3fVUGbd5UgYsyX3jZfs  
gdW0KIbfFINX64jejc/2Yrfi4fFOGhcUibiAkRaFuBdz77jUBKiH/t7nYxuN  
2D59RaYsD+Nh66NcemKQ2rN5TPSUj2v+DkM+1Dj8mUNW9D9KwvJvif6WM3GQ  
j2jdt/JMCraIQmqK27jlk1HQ+NKYio8/SJnzePFYc8pbeKgmHSHuGp3nzRLg  
2U6VOWKbAYHUydnhoQS0znZbdm4i0GEsvCQu2Y/c7geJX/QPwNRb0JxpzYMs  
MWWwxPAg4mTlzoep8iBHVzi758dDUNRSeF2Xy8dB4QGPAaVMLDriWt6rk4jq  
0xocLaUs2Pj90lvZmQirMFVu/NcsrKMqeEuxk8DSpkSsfmNm5LHs6ovkqDc  
ofRn2UgO2H1rHGncZDi/E9ivfXgYGfPax+ZmkqE1I6+d/jAXY246NI6HUICQ  
LRow6c7DHsW/uulUBGCf5p6evJAPi/HWIVaWAPfW819lthcgMbQy33ZxKq5t  
HjA2qivEw64TLVHpqaCzzLbp5Rdhn0+4YspEKhrqtn1KZBYjljsCtYg0xL91  
cAnvKIZvxlTb8JM0KGowvLfYliAqeiCh1zkdI2TU66qzJRDqy8/FtqYjvVwl  
rMGgFP+EKTkJVYV4f+AuafxUKeTxldgzTYgS0VnOKs0y7FSJNSgWC7FkuPFe  
amUZbqvHFFXqZICZrWmSt+ZntLRH7LZiZeBK4rXVusU/g/FDXnpEegZk/LmX  
a5XLYc/3Gdf6NQOHCfabpqxyZI/Ejly9zcbjWtu34C/laETVjDOFwF+3t07P  
J1cg04wa7Eoj4NDYoac9WQHRwpmGcBaBS9VyzcZTFfhiWmSgyiZgWuFrYf+p  
AquPp5Rc/27tgxKHoLkKBO6KNVHfRuBzkG7oMQqJdwvymXf8CPy2LPeo2nIS  
mmOD9frBBPSSApSUzUloOXHvPYogcDymvzlzbsRbZyeJYA8Bld3TmibWJOZk  
Qr/p7yVAYRXQPGxJBFNS3yRHEhDTOl3zHEnQDLP610UTqHi5/qAcm8SN7mZ6  
VDyBpf08+VxbSNx9pWq6IoHAoe4/Sgz8SNyfGlt59bvjRUE1/9tOwirgSaMS  
j4BnWfHVgztJZEUnW5LJHDrsJhZtptEZOkiv4AkApszNnTXRpDQ8xM0SCUT  
2BB983lnFilcuWFVVgqBX3YuD3sUTWKfRq/x5+9WDwx5PxxLolTT3apWQKDY

uylukkvi+Bq3DW6pBORc5mb/TSCR8qpHceq7/wPD9l6E

"]]]]},

AspectRatio->0.6180339887498948,

Axes->{True, True},

AxesLabel->{None, None},

AxesOrigin->{0, 0},

DisplayFunction->Identity,

Frame->{{False, False}, {False, False}},

FrameLabel->{{None, None}, {None, None}},

FrameTicks->{{Automatic, Automatic}, {Automatic, Automatic}},

GridLines->{None, None},

GridLinesStyle->Directive[GrayLevel[0.5, 0.4]],

Method->{},

PlotRange->{{0, 1650.01385}, {0, 613.7109353}},

PlotRangeClipping->True,

PlotRangePadding->{{Scaled[0.02], Scaled[0.02]}, {Scaled[0.02], Scaled[0.05]}},

Ticks->{Automatic, Automatic}] \) \! \(\\*

GraphicsBox[{{},

{RGBColor[0.368417, 0.506779, 0.709798], PointSize[0.6], AbsoluteThickness[1.6],  
EdgeForm[{GrayLevel[0], Opacity[0.3]}]},

{RGBColor[0.368417, 0.506779, 0.709798], PointSize[0.6], AbsoluteThickness[1.6],  
EdgeForm[{GrayLevel[0], Opacity[0.3]}], PointBox[NCache[{Scaled[{Rational[1, 2],  
Rational[1, 2]}]}, {Scaled[{0.5, 0.5}]}]}]}],

AspectRatio->Full,

BaselinePosition->(Scaled[0.1] -> Baseline),

ImagePadding->Automatic,

ImageSize->{10, 10},

PlotRangePadding->None]) blood

\\(\\*

GraphicsBox[{{},

{RGBColor[0.880722, 0.611041, 0.142051], PointSize[0.6], AbsoluteThickness[1.6],  
EdgeForm[{GrayLevel[0], Opacity[0.3]}]},

{RGBColor[0.880722, 0.611041, 0.142051], PointSize[0.6], AbsoluteThickness[1.6],  
EdgeForm[{GrayLevel[0], Opacity[0.3]}], PointBox[NCache[{Scaled[{Rational[1, 2],  
Rational[1, 2]}]}, {Scaled[{0.5, 0.5}]}]}]}],

AspectRatio->Full,

BaselinePosition->(Scaled[0.1] -> Baseline),

ImagePadding->Automatic,

ImageSize->{10, 10},

PlotRangePadding->None]) liver

\\(\\*

GraphicsBox[{{},

{RGBColor[0.560181, 0.691569, 0.194885], PointSize[0.6], AbsoluteThickness[1.6],  
EdgeForm[{GrayLevel[0], Opacity[0.3]}]},

{RGBColor[0.560181, 0.691569, 0.194885], PointSize[0.6], AbsoluteThickness[1.6],  
EdgeForm[{GrayLevel[0], Opacity[0.3]}], PointBox[NCache[{Scaled[{Rational[1, 2],  
Rational[1, 2]}]}, {Scaled[{0.5, 0.5}]}]}]}],

AspectRatio->Full,

BaselinePosition->(Scaled[0.1] -> Baseline),

ImagePadding->Automatic,

ImageSize->{10, 10},

PlotRangePadding->None]\) gi

```
(*-----  
-----  
-----next mouse*)
```

```
vn=readTac["C:\\Users\\exx\\Downloads\\TbAM5, Liver 2.5325, GI 0.875125, ID  
3922.csv"];
```

```
Lv=2.5325;
```

```
Gv=0.875125;
```

```
id=3922;
```

```
vn[[1]][[1]]
```

```
{{10,231.88},{30,456.577},{50,253.74},{70,210.072},{90,193.229},{110,184.462},{1  
30,173.572},{150,163.781},{170,157.465},{190,149.621},{210,141.011},{230,133.4  
73},{250,122.321},{270,119.185},{290,109.72},{330,95.8893},{390,82.0176},{450,6  
8.0065},{510,58.8105},{570,50.9324},{750,32.5296},{1050,22.287},{1350,17.5003},  
{1650.03,14.5926}}
```

```
model= mouseModel[Lv,Gv,id,25]
```

```
ParametricFunction[!\(\(*
```

```
GraphicsBox[RasterBox[{{179, 179, 179, 179, 179, 179, 179, 179, 179, 179, 179,  
179}, {179, 180, 180, 180, 179, 179, 179, 179, 179, 179, 179, 179}, {179, 179, 180,  
179, 179, 248, 248, 178, 179, 179, 179, 179}, {179, 179, 180, 179, 179, 253, 248,  
179, 179, 179, 179, 179}, {179, 179, 179, 179, 179, 248, 248, 179, 179, 179, 179,  
179}, {179, 179, 248, 248, 248, 248, 248, 248, 248, 179, 179}, {179, 179, 248,  
248, 248, 248, 248, 248, 248, 179, 179}, {179, 179, 179, 179, 179, 248, 248,
```

179, 179, 179, 179, 179}}, {179, 180, 179, 179, 179, 252, 248, 179, 178, 179, 180, 179}, {179, 180, 180, 179, 179, 248, 248, 179, 180, 180, 180, 179}}, {179, 179, 179, 179, 179, 179, 179, 179, 179, 179, 179, 179}}, {179, 179, 179, 179, 179, 179, 179, 179, 179, 179, 179, 179}}, {{0, 0}, {12, 12}}, {0, 255},

ColorFunction->GrayLevel],

BaselinePosition->Bottom,

ImageSize->{12, 12},

PlotRange->{{0, 12}, {0, 12}}] \) \(\(\*

GraphicsBox[{{}, {}],

{GrayLevel[0.55], AbsoluteThickness[1.5], Opacity[1.],  
LineBox[{{9.0909090909090909\*^-8, 9.090909090884856\*^-8},  
{0.0874367476365131, 0.08197166587636243}, {0.18222810297558026`,  
0.1358255024317191}, {0.27073779576926765`, 0.13315455086535802`},  
{0.3575112797365835, 0.08143316377978886}, {0.4516394623155443, -  
0.007347854733426912}, {0.5394859823491253, -0.08816932746972758},  
{0.6346872009943513, -0.13787329990112937`}, {0.7281522108132057, -  
0.12816574147938434`}, {0.8153355580866803, -0.07001063326902106},  
{0.9098736039718, 0.02121659675083076}, {0.9999999090909091,  
0.10024804094746914`}}}],

{GrayLevel[0.55], AbsoluteThickness[1.5], Opacity[1.],  
LineBox[{{9.0909090909090909\*^-8, 9.090909090880112\*^-8},  
{0.0874367476365131, 0.08090369567458766}, {0.18222810297558026`,  
0.12746559200130417`}, {0.27073779576926765`, 0.1116266937044405},  
{0.3575112797365835, 0.046963725126600256`}, {0.4516394623155443, -  
0.04509050859182233}, {0.5394859823491253, -0.11115559892361665`},  
{0.6346872009943513, -0.12642564594664163`}, {0.7281522108132057, -  
0.07740196037964171}, {0.8153355580866803, 0.004179083230780074},  
{0.9098736039718, 0.08937493944143977}, {0.9999999090909091,  
0.12834702174618903`}}}],

{GrayLevel[0.55], AbsoluteThickness[1.5], Opacity[1.],  
LineBox[{{9.0909090909090909\*^-8, 9.090909090875369\*^-8},  
{0.0874367476365131, 0.07984396759533968}, {0.18222810297558026`,  
0.11939549826670079`}, {0.27073779576926765`, 0.09184904274707059},  
{0.3575112797365835, 0.017913117173780694`}, {0.4516394623155443, -  
0.07109962300031061}, {0.5394859823491253, -0.11717052830989395`},  
{0.6346872009943513, -0.09879571259704382}, {0.7281522108132057, -  
0.022693471356141894`}, {0.8153355580866803, 0.06128703302641453},



{0.9098736039718, 0.11605625481609519`}, {0.9999999090909091, 0.10415981267620744`}}}],

{GrayLevel[0.55], AbsoluteThickness[1.5], Opacity[1.],  
LineBox[{{9.09090909090909\*^-8, 9.090909090870287\*^-8},  
{0.0874367476365131, 0.07879243663407876}, {0.18222810297558026`,  
0.1116081822210312}, {0.27073779576926765`, 0.07372482040530459},  
{0.3575112797365835, -0.006267252216927747}, {0.4516394623155443, -  
0.08743897872291118}, {0.5394859823491253, -0.11109134853087661`},  
{0.6346872009943513, -0.06371549528296311}, {0.7281522108132057,  
0.02544576624054603}, {0.8153355580866803, 0.09464282937855747},  
{0.9098736039718, 0.10731931496853601`}, {0.9999999090909091,  
0.0516787429232188}}}],

{GrayLevel[0.55], AbsoluteThickness[1.5], Opacity[1.],  
LineBox[{{9.09090909090909\*^-8, 9.090909090865543\*^-8},  
{0.0874367476365131, 0.07774905743802465}, {0.18222810297558026`,  
0.10409673959866513`}, {0.27073779576926765`, 0.05716133039337165},  
{0.3575112797365835, -0.026084496726167965`}, {0.4516394623155443, -  
0.09591154799603378}, {0.5394859823491253, -0.09685594593277226},  
{0.6346872009943513, -0.02730376120671303}, {0.7281522108132057,  
0.061646715198529656`}, {0.8153355580866803, 0.1046634148537508},  
{0.9098736039718, 0.07509702498429204}, {0.9999999090909091, -  
0.006536873471333553}}}],

{GrayLevel[0.55], AbsoluteThickness[1.5], Opacity[1.],  
LineBox[{{9.09090909090909\*^-8, 9.0909090908608\*^-8},  
{0.0874367476365131, 0.07671378556951527}, {0.18222810297558026`,  
0.09685439581479163}, {0.27073779576926765`, 0.042069810325321415`},  
{0.3575112797365835, -0.042006785469922474`}, {0.4516394623155443, -  
0.09808544986431629}, {0.5394859823491253, -0.07760167026270944},  
{0.6346872009943513, 0.0063643674428021085`}, {0.7281522108132057,  
0.08405712128907425}, {0.8153355580866803, 0.09555213349985489},  
{0.9098736039718, 0.03202960165577907}, {0.9999999090909091, -  
0.054402034659985464`}}}],

AspectRatio->1,

Axes->{False, False},

AxesLabel->{None, None},

AxesOrigin->{0, 0},

Background->GrayLevel[0.93],

```

BaseStyle->{FontFamily -> "Arial"},
DisplayFunction->Identity,
Frame->{{True, True}, {True, True}},
FrameLabel->{{None, None}, {None, None}},
FrameStyle->Directive[Thickness[Tiny], GrayLevel[0.7]],
FrameTicks->{{None, None}, {None, None}},
GridLines->{None, None},
GridLinesStyle->Directive[GrayLevel[0.5, 0.4]],
ImageSize->{Automatic, 28.4375},
LabelStyle->{FontFamily -> "Arial"},
Method->{"ScalingFunctions" -> None},
PlotRange->{All, All},
PlotRangeClipping->True,
PlotRangePadding->{Automatic, Automatic},
Ticks->{Automatic, Automatic}] \) Expression: {Bl,Li,G}
Parameters: {k1,k2,k3,k4,k5,k6}

```

]

```

Manipulate[Show[ListPlot[vn[[1]],PlotRange->Full,PlotLegends-
->{"blood","liver","gi"}],Plot[Through[model[k1,k2,k3,k4,k5,k6][t]],{t,0,1500},PlotRa
nge->Full,PlotLegends-
->{"Blood","Liver","Gi"}]],{k1,0.001`0.2`},{k2,0.0001`0.1`},{k3,1.`*^
6,0.01`},{k4,0.001`0.2`},{k5,0.0001`0.01`},{k6,0.0001,0.01}]

```

```

Manipulate[Show[ListPlot[vn[[1]], PlotRange -> Full,
  PlotLegends -> {"blood", "liver", "gi"}],
  Plot[Through[model[k1, k2, k3, k4, k5, k6][t]], {t, 0, 1500},
  PlotRange -> Full, PlotLegends -> {"Blood", "Liver", "Gi"}]],
{{k1, 0.0044}, 0.001, 0.2}, {k2, 0.0001, 0.1},
{{k3, 0.00102}, 1.*^-6, 0.01}, {k4, 0.001, 0.2},
{{k5, 0.005430000000000001}, 0.0001, 0.01}, {{k6, 0.000660000000000001},
  0.0001, 0.01}]
Clear[newmodel]
newmodel[k1_,k2_,k3_,k4_,k5_,k6_][i_,t_]:=Through[model[k1,k2,k3,k4,k5,k6][t],List
][[i]]/;And@@NumericQ/@{k1,k2,k3,k4,k5,k6,i,t};
fit2=NonlinearModelFit[vn[[2]],{newmodel[k1,k2,k3,k4,k5,k6][i,t],{k1>=0},{k2>0},{
k3>=0},{k4>=0},{k5>=0},{k6>=0}},{k1,0.004`},{k2,0.0001`},{k3,0.001`},{k4,0.001`},
{k5,0.005`},{k6,0.0006}},{i,t}]
NonlinearModelFit::eit: The algorithm does not converge to the tolerance of
4.806217383937354*^-6 in 500 iterations. The best estimated solution, with
feasibility residual, KKT residual, or complementary residual of {5.25368*10^-
11,0.0101065,3.32592*10^-11}, is returned. >>
FittedModel[newmodel[0.0384675,5.86338*10^-
13,<<22>>,<<21>>,0.0991456,3.20853*10^-12][i,t]]
{fit2["AdjustedRSquared"],fit2["AIC"]}
FittedModel::constr: The property values {AIC} assume an unconstrained model.
The results for these properties may not be valid, particularly if the fitted
parameters are near a constraint boundary. >>
{0.901635,891.776}
fit2["ParameterTable"]
FittedModel::constr: The property values {ParameterTable} assume an
unconstrained model. The results for these properties may not be valid, particularly
if the fitted parameters are near a constraint boundary. >>

```

|    | Estimate                 | Standard Error | t-Statistic             | P-Value                 |
|----|--------------------------|----------------|-------------------------|-------------------------|
| k1 | 0.0384675                | 0.00809601     | 4.75142                 | 0.0000113199            |
| k2 | $5.86338 \cdot 10^{-13}$ | 0.000555365    | $1.05577 \cdot 10^{-9}$ | 1                       |
| k3 | 0.000894798              | 0.000252751    | 3.54024                 | 0.000738434             |
| k4 | 0.0038254                | 0.00168625     | 2.26858                 | 0.0265705               |
| k5 | 0.0991456                | 0.0201139      | 4.92922                 | $5.85276 \cdot 10^{-6}$ |
| k6 | $3.20853 \cdot 10^{-12}$ | 0.000288083    | $1.11375 \cdot 10^{-8}$ | 1                       |

```
Show[ListPlot[vn[[1]],PlotRange->Full,PlotLegends-
>{"blood","liver","gi"}],Plot[{fit2[1,t],fit2[2,t],fit2[3,t]},{t,0,1501},PlotRange->Full]
```

```
]
```

```
\\(\*
```

```
GraphicsBox[{{}, {},
```

```
{RGBColor[0.368417, 0.506779, 0.709798], PointSize[0.016666666666666666`],
AbsoluteThickness[1.6], PointBox[CompressedData["
```

```
1:e]xTTMoPSmViYGCQAGIQDQEqDp4Tj23S+pPjAOHbObAsvnPcurMGyvd0+HU2
```

```
c/e67fkQfkOgw/POns1+TllQfpjD0dN6xaHqGVB+tIO76oXdZ/jSIXyHBId7
```

```
8TOW+21KhfAPJDI4f1xe868iBSqf6vBx1p/dj9clQ+XTHUxLltrubk6Cymc5
```

```
nFaKexG9IBEqn+MgNOvkHcX1CVD5flcw7jeGE6fEQfgPChx4QrLZ7p60hfAV
```

```
ihxc5W37pfOiIfwFJQ4bi1c9f/UjHMJPqHB4pW65Wb4xBKq+xuHYvtaPWQyB
```

```
UPPqHc6XWW/cm+4L4V9odLjf8S4yvNwTwi9od7CfKRJ5ytkBws+Y4OCS0RFc
```

```
7WkG4UtMdUhXDbIXaTB0+LQhIFvqxEyHNBf9I2n6ug4AS/B2yg==
```

```
"]}],
```

{RGBColor[0.880722, 0.611041, 0.142051], PointSize[0.016666666666666666`], AbsoluteThickness[1.6], PointBox[CompressedData["

1:e]xTTMoPSmViYGCQAGIQDQEqDo1v73RLzFB2gPDtHM5OddzqmJsN5Xs69C9w  
2p+wpgjCbwh0eKI49/S+9SVQfpgDi+h8n7XRpVB+tEN6+7pfm85B+Q4JDne7  
K9PrvkD5B5IcODOjr/R8gMmnOszrSnUx3gCTT3e4/ipRriMHJp/l0Bp0dB57  
FEw+x0Fqju7RqjiYfL7D9cpUjR97oPwHBQ63U1NMLR5B+QpFDt+lJ/3X+w/l  
LyhxyLn/tjuUrQzCT6hw0M172zfNGaa+xoHvtljqta3FUPPqHdruhB3ZpQbl  
X2h0CDRE5Ke6uRDCL2h3ODi58LlsbT6EnzHBwZ/x6hM/7zwIX2KqQ+ht3w+8  
z3McPm0IyJY6MdNBe0L/mZtmuQ4AV7h6Kw==

"]}],

{RGBColor[0.560181, 0.691569, 0.194885], PointSize[0.016666666666666666`], AbsoluteThickness[1.6], PointBox[CompressedData["

1:e]xTTMoPSmViYGCQAGIQDQEqDqfKFVkaD5o4QPh2Dhc7/R6ob0+E8j0dWN9E  
HvsTmAbhNwQ6bElxiWAWyoDywxwsIt7tvvE7E8qPdphVdk24aV82hO+Q4FCz  
mldb5XwehH8gyWfP94on0zcUQOVTHc4vtt3JOL0QKp/u0KG1MOH16SKofjbd  
wq6ygtfCJVD5HIe9Jq4NxvylUPI8h5innC21+mUQ/oMCh7cb9IS7bKF8hSKH  
NdOtlFmzoeoXlDjw+ghHu/GXQ/gJFQ6B5euXLJteDVVf47DvXsTqQuk6qHn1  
DuqyDIKcmxsh/AuNDvLTxFfd2QrIF7Q7tPj+YHixoBXCz5jg8FayYsmBjb0Q  
vsRUh6vnDLZuXTXR4dOGgGypEzMdyu5GT8y4PdEBAMrrdQ0=

"]}], {}, {}, {}, {}.

{RGBColor[0.368417, 0.506779, 0.709798], AbsoluteThickness[1.6], Opacity[1.], LineBox[CompressedData["

1:e]wUl3k81F8XxxGyk+xLCWXJOmbs7vfY9132ZN/33djGICJCUqoH0qLbNmK  
SlISESmJJCFUSCEKzzx/zev90t977zmfc86dc494htn40FBRUY0wUIH9/1fz

19jPCHYqzJeP7GMQXQqfzs3Vf4/9iCXVqP1KG78Eqf3CUXdif2Bp1iba1x2L  
Ict71uAn3wYWeJSHSLd6AYZm1ezOxu5gDn6XucXLz0NuY1/9wUAaGHS8qHXO  
owjuRUaqfOajB9GDQRorqoWwudanlxTLCpLyjneUtPIhz6l9rqqlA/DTwQYq  
J85CRTtbLXMgjzhybM7t5uZAA793cKQ2FXTzg37Jp2x4mtAuP87Haw3cN+mU  
LLlg7TjbL2yVF57YNIwKvsuEr2reLTV9/BDWQPWjLSYDmLfZtKjJhUEajCsU  
N9JAYnmbasL8MCGptynbj5KA9+Pk58oiERB6OaSRdiYVRPKydO1SjgCV/zWH  
orPJIKWFq94fKArZrr/K2+8lAu7HJP2DE2Kg77zxe3k1ATSuZvmHaotDuS4V  
0cliHsx3Jo+/5TsGifT8T8/Zx4D93ay8bFoJIH4Z3iHsRsGpk7gVjVUJKFAO  
tb/wIBL8WT9arUxIwusd53CDvAi6MxqvN4nBUPTpD6GyHAghuC47JukYbPQ  
L9RkOBTSht/GMFYcB8k8Qek/n4LhYjJOLTxWFkZXKtz9nAKgXPbjZTFPOZj/  
UXrR/rEf1HzM+vfOXB4eTo3YM2v7wnsDfveIQW4uGRr833cGybLlz+VFymA  
PXM1a9gZL5jeeFoQz6AIHi82FCQtPGHOolTbjkURRi8XMnUf84DIXd3/6AJx  
QJfyXMPe2A3W7PntPn3CQdc9Ay5LFVfYrFumbT+hBJIGjcXbYc7wj/7Z/aIX  
SpAZH6bq00MIVKdKfY018fBDV/lXKcEBaFtDeQ1a8UB/dOkz+6MTwMiu139Y  
lgB6DslGIu52wPloWeoNnzKMKSgPaHyxBh7eZx/u5CvDN7HJa+e7rUAwrDT3  
NK0K2HAY0qj4W4JIX6imO1EFpotm73mGmIP4Yb0faqsqoHaK9x2pyBQk4/jL  
D/qqwoOicpm8t8Yg07Rs8WNCFXwQa8lNvBEop5bWV/apQRzb9V0m0Af1sVAP  
opY6iF7hHhda1AVMXo/Trkkd5Gutvg7e0AG9LP6nslIacl52+sATojYYfVqO  
2l+hAb5ZZZZ33QHMVJ6Jf+bSBB/1I1d66hFYnyt925GjCVaJpC9SnmiCM6an  
EhqrBftgk08GUg05L0lyxQ0tmCW/fo47rQI0Qxx06zEI8nWJNY+/EeAdz2ZQ  
2zqCRt3xV8YheLjt9nEkMQaD9IXxrhkGJSDVPFXD1jE400L7oPehlkhv2lml  
qQMsXI0TN89SgF2k0arXAYBGzK54NMvAgmdd4LFtgPOv5W6efSQNI6ePHGJQ  
1wZi2u2Jye+S8PDWheHFBG0IqkORf9Qk4Mbg/swX7dqwe7NQ/UHVUShaI6re

3dIGkZrDzPzHxSGJZ/lbvpoOiD2P2lJ+IQpWbqM2Nu068Hrxx/1H1iKgTjak  
x2/pgEob7VO6wEMgXtPRzq2mCzLT+ozuDkLANiAbshmvC5BS2fPZXwC2fISK  
jLfpglpPSyh/GR/MHuAa7fijC0Zix4xbl3lglkJCVVaaqB0ajZ2NL3bjhenLI  
8qk2PeAeM3pslc8JZ69NX9P+owfp/l+HzpkcgNge2xNiqvpgxGXXOSXEAE6L  
vQx08RQuUtx03M8GppzqD+db9WHkd0fnmb/MoKx4N6x/Ux8GeOmMrQ8ygcgJ  
EbFbKgbwwwvRkrMZA/wuo88JaTWAfdSeSi78dDD1OEHLctMA/mmt/NWo3Qf9  
s99XFVQMweBZ2ysFGxpoZHCv4owzhNUCMYUznNRwVeaNw+8WQ6jnPCBsM7yH  
ZVsZML/bMIS6maP35Gp2sMjo9q5WZSNofZzZ9KnyL2bwsOJoYosRRMr/gWs7  
m5jCNOe464YRhErenWJ22cAEaE+fRcrGELs+Z7c3+hujldzCRGKNQfienerp  
gF/YimnwL+oWY+C/BBJvedawD2Gfar6sG4MY15GfyhOr2LPzNs49BBMQmlCV  
0QxcwUomVJ9k3zeBRLoiKlfDbxh573Z04LoJ2MHwP9+gRSxY7LCkGcEUHpbw  
yszf+4rZGxZNyMaYgu3KS8kyznlMO4juHPt9U7AZCL+RWjiLyZyL1/n52xTU  
zrYkV0p/wXiavq2P4M0g8qPeQdXjz9jS9rBrcbMZKCdtVYbSfsJGD+lzxP82  
g7Keu0p6XyexLp22p054czh4blzffkDdtP3eJxGtDkY25Y+Z+Yfx4pyyqWF  
m82hPJaGQ9xrDEuqOzC1+8sczI+KA++Lt5jvSEbhtJIFsJu8dv9gMYppCAT9  
+a/JAgYTMTHn68PYs5mYVeMVC5iX7hzyJr/GzG6TFlakLWGCc2SlcnEQexuV  
O33R1xK+ZZeYT6y+xNw0i99rXLeEcuNfl3p8L7CvtNdef/5oCWtxrGLjJ59j  
bfMnZp+yWMG/PKvdikd9mPY998kAlytYozlh979+hp0+6Pte09cKbrPYs00n  
PcUG4oJG2TOs4D3RMfQW6sbYJsNfz1yzglfOl1485HqC2UDsy/uPrMBbYk/9  
2t9HWHFVYn/2RytYPiXQ5fuzE5tgSHvm8ctKTmg73o9geIh5D+c+pFaxhnwV  
I79jRW3YTUJh26idNfzJfNi/RNWK/Sgtbr4RaQ0aS1pixmfuY7jdK/XEAmu4  
69Q3cU2qGYv1vHbHvM4azlKbkz2mG7G03pbli+tYVzK/dzROw3YrvSdql+L  
1uB1qmr5Qm49lvWrpaz0qA34/eWwWKW6i710eFgSrGsDxy1KBjwkbmMcD59c

wDxswLEv+/NyUC1mJ9JXwJlqA+m9t86NvryBIWS8PDtXZgMdt1Z3lYxqsMmF  
4ey2DhvoZFYtdZiswo6Yj2XkvreBpz0V8q1Z/2G3uGeSFLlsoeL9cKf6oWvY  
csLXeFqcLcyoTIS10ldiSlPfo8csbeEaRxAfM005Fq+zFn4rxBYee4of0OMr  
wx7WbAYn51JYK/+liflJIp5x9+q1ha2ohiSBytKML0wGh+xPltYqf2Z28h6  
CXulwnryOY0dtBc5zb7DX8A4yzidykTsQDLmrMmnpSLMnorvRBiyA6VjMmnb  
9wuxy97C1jqudnBThiqz70IBNtUvas5NtINUh6vddCznMFFZSeOFS3bAjb2g  
znkgD/MrlNV/cN80+pjSmSKVc7FVJ1Utj592ULtf8QXHhywM36Wlhmc/ASw8  
X4RL7E5jCaK6hP2yJ0BtI+fh6tcMrOu0keIHkxPQ81ntV1FR0kbzzVz2rv8J  
oIl+U71tQ8YMLG2lSKdPwKpf8p6PJNKwnCbHo7ZVJ4D19ix1JTsJ05jkJbz1  
6QQYunKTqyWSMMdpf/6XOyfg2N2zPxZdiFiZXih3haA9zEbdnE27G49N34w6  
EKlmD1+VXidkCsRh4qwJrPo09uAcNnpX71oM5h+RwsgXYw+7EjHC3BCN3X2b  
TvetyB7sZjtDfNYjMeXy/J2CQXs4hDMNpC4Px25fX8MPfrMH0bP7JkolwjCR  
G/bBzlw080bQLmMOPgQrvt3xn9ExB+ib6olucw/CmOsPTWTqOkB2jFD44VsB  
GKmZzPnU3QF4Csbod9n8sY22eWOqFAfA5wmxX8vzxaaf1LUR2xzg3/lPI9XD  
XtiJXs7V1rcOoNbmeEb2gic2MBArsb7mADXM9x9fDPTAYOiDG47DEQ52mZcX  
2bpj99+g4jBZR7At1/zMVuaGSb+//uqOiSMMXusU6W5wxSon6emW/BzhTNmK  
tuC8M5YzNxjlfD0R/KK1nXT+c8D2FnG3rz1yh01j9M+uS9pj0cvFM10TjuAo  
ZGZ9o8cOW1rb5hfadgS+93rrX+JtsVObbtZOvE5w9qNAwj+wwUb/dmcX451A  
zWSj7KKQNWZCJfH4jbUT0H5rCotissLwjCtyFmcp9rerw/qKZlgtq61vbq0T  
cDp+uns9xAQ7xNl6tb/XCV4OMQXp9BphF3gE39LNokHgYqpesJohxiiYyqJL  
7QzNpt+/+vXoYymHv+iSDjkD9QY7bbm/HvZbzDCxU8MZhGqLs+u06GJTMuxL  
KrHOYBkkf3B9CDBbxagjMeed4fgfxSdqmRjWTxhzbKx3hrjM/1LNzmpHSF2j  
YOWVMzBdDN6ha9LAmLBFn8w3Z/D0fXPdYIMNk9TdtxfA4AL/xG0OWjuoYuWG



fso3jrpAdjNAlt+wMuX/Ub76iLsL2OTzL+qy4rEdu/OTbsku0LqJG6F/icMi  
nTYPII12gZwTOZzL5YrYwkkX0/FWF5CRIKBuzFDATno+IvO8dQGJcouyY3/k  
sBFfsQ7bNcr6VueTtAaymFFQ1s8CdlcYHf7Ttqt8HMNFW7ozm7hCx39Vxz2X  
JLAb8U2XjPxcYZHx6KRO0DFMKJl3KDPDFdZLHmRK0R7FitIS6Z9ecwVGVoHw  
M01i2P7Tn7SoHrnC78st/N/iRLGkHN0YrUIXyEi+tcludQRby79xh7jlcPl2  
rjHd6iLY5KUwwXWlk7Bp3q3Lc1oIsy57Y4OzPgkSNQI43k4BrLdSjScs9CSU  
+PoPPefgzSrrzy5k3sSPKJferqk8mINtXt/Fm+ehDnm0uq/9DzYsTovBYne  
kyDPiILMXcOFITX2+XI/OQmnmvQjIwuUgdvrbuXdTlDneTL/eso3mALbyNy6x  
WMsNunU6smZb2TFHTXcRi5Nu8E+R/alCESv2JMmohy7ZDUTSpq6/KmTGpDsV  
AjvL3MA3qioa18yInd/hY4956AYcobnEsY392D8t6maZSTdotfrklOpAjw11  
De9cETwFjgZTzoFB+zDVvfbRthqnQGDh++qWAA12HbtuyOxyClrL/3rhP1Nh  
zKSc793EU5BjZkq2SdhD0Y8jC4mXTwFfp4rYcthBH6lclHEdp2DHs/V9lctf  
ZKct07E4fgqCGnKPV6RtlZbPZ4rusLjDExcbYsbxDQTUu97ZQu4QeKjEMOr2  
bxRzJFLFW8YdNhl+Invo/0K3t0cZQdMd9EN7QwM3f6IpD+dJQTN3+HuF9wrz  
41V0kDxYt+niTnmXyXDd0VhBRtd10t4EuUPWXmIm86EfqGFG+lhurjvQSHI4  
PbZcRPM0FX98r7iDjmXN/dGSr0hA7OALndvuwF4cEHx7bw5Z6mZdPfTAHRLw  
EzWnyLMow+tv2PaAO0x4JuWzHP6C2tLDdN59cIfo3cm2B28+ox//feFqXHIH  
o0wHurbyaWQ/+6I9gMkD+tj2i1NmJ1EOLZzVF/AA72EeFlj9gB6JN7sdkfaA  
jSh3mbfC4+i3nqTijpoHtKvWBA8EjiFJn7J948YecGjGh1bt7Vt0MpPjXbOT  
BwTXvR/TdBIFRdUZNwsCPEBtUuXFz+0R9Hcu2NzojAcE1h0RnU99jRToPx8W  
L/WAqB+q6wbPBpH3sRNrezc9YMTh+07FvZeo1OD5s4k2DxAa5KXTfDSABn21  
LrX2e0DR1NxVbLUf0WQ1Bjx/7wEr5gbf/mF9SOXGUc2wBQ+40WT1qf9OD6r8  
yvr5GIMngEaYKPVYNxrdT26i4fOEGGPGaonCJ4hRciNzSsITjn3L5p96PEBI

KNCxQ8UTys0umsXldaFI/ynpYkNPYHWjtYxNfohuZNvsRDh4grjqaLdFYQea  
vNk7ZO7n CZ4HbIsHetuQ/mJdNF0W5d17uZh7NO8+IjKKGX4u9oQs5YM+9QLN  
qE7qEn9njSfQkk5hqo8b0Rdj5u8LLZ7w+rGWJ11yA+ILTO2K7vWEEvNAiUbl  
emSW86vA6p0n5f7UGW4IqUNpt/y8ZOY9YUsd25PwvIOWliwZZum84HxASEB3  
w01k8HvxWz2XF5SPORueFruBru+kDyWLeYHg3KNo77pqtEt/qMkE5wWh149k  
7rOuQi4cbcW82l7w5TAdCxPTf6iN34Y4a+kFGyErZYfeX0NcYt9PNrh5Qev1  
ff8a2ivRS4LIUdMkL6B6UPPkiedVJil1MPDlesFj9x/7IfcKyjCy+z5b6gW1  
X6Ms3w+Xomnr5aGGm5Tzn4b6t+BLkJZLdlNKqxe4+XKK0TcWo8veopdMe73g  
ar2I1rrhRbQR8pDI99YLFu6mdf/5fR7VkVa1G9e8wL+SImUkvxAx5eQcTaX2  
hlrtlvdr8QXI97w4oxmHN8wQiLmJi/mou6zr099hb8in7a6rp85Dh2scX8/J  
eoP2lTdir1VyUdK9taZGTW8oWGWA TzpzBr1v03sp1dQbqqjvGY5sZKGCf4/d  
+A084dGF0k/5Q5no+6izznycN7Q92jfmOpqOjKZ+H2067Q0GZXksf8rJqOpr  
PiPpojfm7vZPH0xKQ9Q/JX+YVXnD5gOc4tMAEnLb7n7N3+QN4o+s0pVepqCO  
fSeb5594w3iPwZmtmSQUyVOYSPrkDUghzJUIJAENHj5+ynzZG/503hMPmoxD  
0lI9Ogl73hB9qlvS2ycWncadOvaV2QcUJmV9qehj0BeNLcZmAR+oiEv4YPQw  
CoH++R8kKR/wsJdJNzgdicosZIfNVX1gPsaLrdEzAtl5eJR8PeEDg70Mais3  
Q1F94N/EZm8feFnwgcFkKBixRF88lRblAyb+J39ncAch/2R5XQuyD0jXJodp  
JQSgntPPjwkW+gDhnsQyxx8/JFrgxbRQ4QN+7wxny875opTSnR/NdT4wIHg5  
/IKWD1K+o3jf4qUPrEIDUXLSExXdf1EiOOEDDedqZyIGPNByl0/SwqIPcGp9  
2dF64Y5M+vd03f/jA1+/NOhMtZ9CN4ZLdcn7fcGijklv609JRDuhJGHJ4wtq  
x3trDzq5IvfZV0xCR30h8864cPigM+LbpB65r+ML1/J1uhSpHFE0Vdl9srUv  
uKQ1dDx9aI9eMyqXWrr7ws3N8htD+SeQzMHXSUJhvnDP1GO3MNoOnREKdF9M  
9oXsMQtVw2BbNH+UVq/lrC+ErXcOHo+2QTry5RLpV3zh8h6tRIKONdrWHlkW

aveFye0iy9NdlsgqQI5R4rkvSGfn3tU8ZIFqCnLEFMd9IUOUekCjzAz9a53X  
0lj0hVMPtEzllE2R7ScdR/0tXxDSyx3rWjRGt+grli0Z/cCwTom7pNkIUcn9  
PevE7wd+30i3vC8YojtJTU9C1PzA9Vy2B3u+PqKpYp+MM/YDXAquNfqGHnJ8  
EbSR5uQHiruLa6wjuqhurY/jbIAfdOZMu3uz6CI6AfHjxQl+IF9haE59Qge5  
apP0K8/4wUaLFW3oLW3U6D956lapH5DMZUeUmLWRW+uFC13tftB7xj9H+QOG  
mqdW6/qf+0FWoSfXowmEmOjNn4+M+0Hso+ofzKtayF229svkoh98ZGuScuLW  
Qq12dLvzW36wTmSenDHWRGxJHnw/Gf2Ba0+eby5XA3n/14n7y+8PucXXfl4Z  
V0ccazF+70r+sEKjnXi5RA358o+k8Zv4Q7dpVka9oxp6CHJlYs7+kJF3kd44  
UxVx+ue0yAb6w3Op25NEJIUUCG7+tQrRHw6R98e6lqigxy0637RzKPxn0ZVW  
TgXxTjXTmV32h/7vifi8AWXULeOg7t7hD1H5G71dfMqIz67JLnDAH4J6iKML  
zwkoNJE9LPqDP2COF2f50wjo2fWgMyLL/tDhV1QyqEVAgn9/2Vv+8Ple8dz  
6Xt4FPITrKuIKQA0AwMC7vfgUT8f6X2ZQACoTp3i+HYOj6L9VFkb1APgRe/0  
VLYCHg3kX5B4YBIA1RyGtXH0eCTSsqrd4xwA2RqBnu2fFDsRzPXocAACKfr  
Mf33QAm9oq2NHScGgKPMsM3yZSukLkNX+CUUnACCU5T5KUKJEW4/bPy4HAHu9  
vM29U0ro2HX+aeoHAXCuWlwtRIYJt2P2WZ+EQDtDMJKRF4INLI6zMUzEQC/  
CQ4JtvuUkCSfnLzltwAoKejRHlrFoVQsx1j6bwD8TXTufvAJh975znhmQMh  
1oVB8esQDsnk66QgwUDwLHry9PATHHo/ud1ooxEIX4KP2OyvwSE5WodXrqaB  
cGVWk7xaikMZx5u++roEgqlT8PGVfBz6YMNOExEUCDpOnV4/M3BlkRgklJgY  
CK8itbTnEnEo+1qfcmZuIGjit8fbonBoql/M+tyVQJg6Tq3nHlxD+NXUoNLb  
gUC9cOpiqw805fBOZv73IBB+bYjNdp3Coa38r52eLwLhNheNSKwzDvnT/1o/  
MhEI+bd6PzafoMSTvCv7eSkQiNX9puescUh/ndG3cjsQWmd8j9BY4FBzMHf5  
KaYg+EhVs4/OFIdEZ0XeHRIlgqzynEvnjHCo0EWGbUoqCMyc+cmlBjhE9UbF  
4KpaEPSO2PsL6ONQqlluiqtxEOTXGK4w6uHQxycWLYJOQaAVvfrglC40mak5

L3/wD4LgDyeiDlK4o97n2OX4IKDKK9oWorCUZISbUzbFvmprHEfhkoqkYr6S  
ILjmHVsvSNmPnjd7cOxGEEQLzFXTUM6LyT9Pf6k1CFp1civEKf7M0IUg+74g  
wNjsDhINccgm+VYs91gQTN2VjvtL8f/J7/t1o/NB4GezDddMcEgh+Mn8+Y0g  
qJOpm/cyw6HyLy8P2dIHQ1aI4pQGRQ9Wl/f2nDzBMFroYHvECoeWjFd6CwgU  
vijS8soWh5yeb09a6geDcXZSCImib78qvQr7iWD4+fBMFacDDinXHwgb9A4G  
laQDIcmOOFQtIXwjLzoYTjN83Gh3wiGuCslPZhmU9VX3I55Q8kXmwfOyXAIg  
74XerHkuOPQzD7N88V8wjB9s2uJ2xSF3OtOsnKZgSAw09D1B4cEk+0fGT4MB  
m7JN160w1m+PTY3wXDutippkrL+TlClfP9MMLzlmTnLQ2GBL/F+WWvBkOrJ  
P/6Ncv4Z54wKA5oQ2Hh948Ijin9/hs+N0XGGQHWV/YqZPQ75G19h7zkSAluH  
V/heUOJ9+7jGMEMxBfwz1bWfU/TQU21M1dUOAVVemhIwx6HGe52tNNYh8JeX  
3VzaGleOSDxfeeIeAmwD0gWplPwVII9KpIWHwMewQ4VqGA7tck+fAllvDFt  
SrVWw6GQvG+X9s5R9q9szH2Mw6FJ2s2hrooQ+Hxvbjb10A6ZJNEwpNwLgdcP  
uR9ki+FQ+y9W0HoUAoWMLGhUAickg/jj/w2GQNH7wqsuB3CoeEa8/sFUCGgF  
hzPy7cch0meFBeJyCOzSRzTQ/FNE0cMaluq7IYC+ufZwrSqiGSNDxy3WUAhy  
2Yk2/KKIHqu49cfJhglukeT7q1cRyd0LoFLRCoXq3I39p1oV0dVjMaobZqFQ  
/1Sf9nWNIijyn70ZHRwKGrSXX9aQFdHi2UvTSkmhUJQp9Wc3VBE50v7H9ys3  
FGTvPNDSdlZEhF/t2RG3Q8EKV+rrL6uIXtp+Gz7SEQo3HRR/vOZRRJ7NQoIj  
/aGQfZ9Jj3FPAeXHpN7FzVP2EzT71v9CAYm/q9+Y+R0KQlX8VFCvgB4oz2Dn  
94XBvM+vEN/zCmhhU2/kl0gY7F4s/lh5QgGlOMYKVsmHwZ2Mnv+q8AqIq/2G  
tx0KA+e7L0xVOBWQNpFps9klDN47W18YLPRL/8NCcYWh4HjhHcizLAOKZyk  
9jIWHQbUXlaVHt9IUW8nru5dUxhc9eC5I5Mvi36IXASV4TAQ6ek7c6JPBuV8  
6j3z9VMY9EmnzBa5ySAR+DNyaTkMzhiqVY6vHUc1pLu4f3Th8EH+w/vjbMfR  
TwUDBzvWclhJaLoXVSyNND9Pjd7hCoc/mucL3gpIozfaHD2uYuFwWOLFwg2v

FKLaF+XQCeFQNP9X3vLpGDJtYk7iNgqHlcb7wGB4DBV7VVWGWlBdp1o2jrXa  
o0jm2dtFYbdwYPdcMTT3FEdOmapJKYnhlH4lXXK5cgRVEYYr35HDwXP4xKGB  
H0XQ6lxAj1x00OT4nFlnEhRBpw2usH0qCYdtYT3zalZh1Lh/txJrCYeF314n  
LxB40E5rcc+lznCo7CLe9HXjQkb+8ksrz8LBqOPwSboETvSp312p8k04PJaV  
uTe/jxWx5DztofpJYQfa9HTnTS0Hddclxz/hQPWzHsmxf9e6vvSbrWEvHCB1  
iHeybVhL1fSYowdbBIgkrm6GaK10+rCcWXpyPAKglSv19E3Wrr0X5FttShHQ  
H9IwTk/D2bWRkxR4TyMC9AKqVvKMuLtOM4YvIzISWHDd5qCoUFcNvcNSXFAE  
jMi1SwnkHu1a7rG6FRoVASljXBdqzpk0KWeaBPokRgB91EnSkzKprR59aMkm  
NwJWqNuhfVG2a4Hq6JLs7Qgl/uuYdaxCqUvh8aFb4k0R0DxmILj+Ed8Vn8oX  
KPiAYr8jZ3PkqHIXwy7zEsOLCLi5+2Nc+JVql1Un3a29kQj47mLwVElOvask  
aS9g4wMlvojLJFyJRpfU37XFL0sRIH+Wqds/C3VFdnyv/bAWAQnqeFWzdayr  
I2E+YHg7ArD8orS5EuiiUZuW6qeJBNWTkEJ3ULvL5M/4YhdTJPSbre+WnNTu  
Kmp9U3ufMxIWD6ev4kK0uz7Evgq4IxAJF0sfYL7K2l2iyn1S/4lGQk9S+HjP  
XegKXH+8WCodCV/5vto9P4d1NTZ31BbgIkGRVxa7vabZtR3VHJClHgk8ikGP  
ntxU69JRqpNK0YkERon52iwq5a7ctRuL0SaRwEQf7REpgOsabbhWG2QTCVUm  
50hTsjdQhFXAjydl8GpTUJ7TEa8y1vhopSTZySY7ZOLtj3j67qzkr9oGRgJ  
olbMUd1UdF2/67JrDSIjwV1hbePilRktzVBygBaR4s97b6F5SSaUIZskhSdH  
gmfOhmbXljd6+T1mUTonEvyfScpXXxBGXHfCao8URULOGN9bY0ZR5BoUEMB3  
ORj+32o6m3JPHFVJe0mxX48EpRn26FsdX9CPRddFuluRIJf+HrIkjZFyrX3t  
vwaKv+fbbg5uSKIUF6uAX+2RkMDn4qEuJoV6JUyklp5EQjRfkEjGbUnE9IV3  
cfp5JASrPXm+cFUC2ddo1Y4NR4LG9hjpklxV06jEjA4Hgkx2c7z6ufE0by4  
olTPZ8r5Vr8f7X0RRXKz0osPFiMhv9PqTaPTERT7n3ht489IuKIpOP9HQAR1  
eR4KqN2i5DNyN/FH1SFEL8onVUkdBV5gpX39xCfk+fnAYjFjFAh0kG84XT2M

SiqZa/MORIFx2eMXRzSOoOITdAEZ/FGQL5//QODGJI8vCeZeCQKZGenDpoc  
PorCp/4sREhFQUvAV+nGQAlkVpSp+FkhCvJnSmRj70ohSQNOopVqFNCvoIUj  
08cR7XZ59yMsCpZXm47XGMuh6bvHmeUNo4DtaMBsgrYCeujRZltuEQU4OfX+  
ZDNFVMKtX8ZqHwXtdbPJTxAORT8fnk06GQXpc9hyjYgSskp2k/3uHQWBLlvx  
WT+VklzitxiX4Cgw17jiwHUBjxjm4roGoqKAqf7e010DApotod2vnhgFqbOP  
Nza7COixWaFILTKKcvY5STewKKMyqkMlfDIRwKhKUzIhpYzim29NZxVGwcQd  
gwRJDmVk568itVICibfvzcyjwKwJSEHoW4VsZBdKY5xYxlYBYXlt1vL0RBSQu  
p6CvUgS0kP6RRv9eFAwuOXk0DOPRM5VA0+aWKJDwoeeKSsSjym8b58W6oqDi  
GNXD3uN4lFSRPlnUEwUmIwuFBI+VkkMtx1GaV1Ggwew5eLZRCeH3Xw2JGI2C  
4+ohqxXnlBDHA6mW6Yko+PcqX+hGtBL6Htqya/klCna6FCJq3ZVQv6iu4aOl  
KDjX8+w/SzslVPVu6JzcWhTwXX4YoG0lhEg5ru+vbkXB1u8z8dInlJArWhRh  
pY6GS/nlmfVeSkh1LSYgiSEa7A8HGyRT3hNcNTSN39ijwYh0J4m7UgmtOp3b  
duaNhm0dia+/+pXQS1Yh3YFD0VD0K15udU0J3XxyM1ftWDQk2K8HVAjhUUYM  
YfSmbDTwKKzWF+vhkbtUtxAfIRpG9DoFggLwSPOjhU+WZjRwOtV3NZzBI77C  
ibsbutEAisLNe//h0W89/w0f02h4WujAudSCR6///EZvbaJh8/Q1ksFTPLpz  
Jy1LzzkaRhPe/t19iUfZ7myvmzyi4WOM0XmrUTzy5rrCjxYQDdfu7m46j+MR  
9Et4FIVHQ4Ptvw9ak3gklNRcSx0fDWWX9X/wfcSjP/Laa+Gp0bDWPPWjmwif  
/fjKffp0NOi8feGlTFIff8k53TI/Gvrf2zx5Q9n/rOnXF10Xo8Ht6a7+8hAe  
+e9FcclDjYak9R0xjhd4pNdEdfjqVTR0aLhcutxLed/55VWz3ImGjs8jk8vd  
ePRPQGA5sSkaqFRc5Elf49H7wRrlbx3RoJF5cCDhER41k5VSnbujYZf/xLdl  
ir1A+XHf8+fRkLH1JK6dEn/wkhmH2nA0VK/E7ovoxyOj8nHHm++j4QhHQXXD  
Kzyiov+1ePprNKC1p198KP6HvT3KokcXA+VS9EaP1/DIUTHnSx5LDEDJ/o7B  
PxR98pY7xg7GALp7/cb9XTySXLQpOiIYA7oD3Le8aAmIQ781IEg0BvykR5R6

GQnoT6Wg9n2pGHjKYNw6wEZA0/9S+fYUYiC08luN20EC6necXTFSjQGyzPGY  
MF4Cqm826ivCYoB7If7CkgABlXDClZ80iIGgSIL4I2ECIgUfiD1mEQNh1Zc  
8CIEZC3+QbzDNQZOTpRQ3RYnoLXzQeTPCTHwhNrz3JIMAX1YGXI6nhYDknsO  
+ZzyBNRtileMyY6BzCMq/o6KBHR+384nhksxcJ+TK5ZXmYCSTnm02pTHwKfn  
lt75qgTk/aAnv6w6BnJdygb5NQgIH5WvvpdAcAy9EqDqTgICEhta4iA9ioODk  
l/MuugREe9zh+9PuGFDNCjt7knK/vJ05fMVhOAbmmGxPPDYjoFibhj8pyzEg  
vz7oct+JgNzquF/3r8fAsyeBgl9cCciAiXiDcycGEs8Hee9zJyDebh37GuZY  
MFo47c7qS0BtiqNNryRjodager0wgoAq81RzeRviwfSBoc/JaALKXizz9FCJ  
pcyrQbSH4wjI8ZrPgXX9WBCZ0Eo7nURAWxyboUJesfAUO37wy2kCmg12MfAN  
jAWevbkCzzMENND/SLg+IhZyD7vbvs8loMuk7Je6pFg47yDEXlNAQOqr/NJB  
V2NBKDRBq7eUgETNUqjvV8UCmer3w19XCljp5sz73duxQLyibcNTTkatp25n  
FXXEwkjXp2Pq1yn6DmnOtY/Fgmzmd9s/tQTkoU7jeP1TLJQcFww5eZsSf3Xf  
QM7XWPBoytGbvEtABxJt6l02Y6FhMCb4dAMBbczxiuntxQIDD3LVbyKgSauP  
F2X2x4FHzWOj9WYCqjnmn7jDEwctjCn2Em0ElFsouzx3KA4yCnZ4atsJKPzf  
mvvgsTjY6HvMKfiAEs9IskGFchz41l/ZHuwkoMNauu1ZKA6Uuf9kcjyi5PMm  
g0y4QRyYFR3J1X5MQEPJ5w9o28eB+bP549HdBNS84Jgh5RYHF0e3/OOfUvSy  
PbR5wDcODqR49oU+I6DUri8B2yFxFgb1XfoodSTVO3kTEwchHvSfVHsJSDj  
C6GWL5LjAE918+ouheX2lLqbMuNg7V94dGcfAR0M3MKX5cWBYA6Xb2g/pZ9G  
u25kXlWd0XGDiAPPCEgjlIEQcjUOYgUfXqihcPct47wT1XGQTZYckh0goJvc  
7FTobhy8wODwDQrnkUYjj92Pg/qM1nTOF5T6sD/luPksDo4EXcx4RGFRmSWt  
/lGKHk+8+vAvCah1bI8h8HccFHxzWlyjsFk69ygzVzwQT1UWT1C+V1z+YPBb  
MB5eCuzlFVKYx6myfVIsHlYOIGSpUfjfUx+ZnuPxYB97mPyGcv5nueMvd5Xi  
ISLB00kUhXtLVw8Ua8RDg9lA9EeK/3doWzJSdOMh+4h9oDmFC8MSN31N4+Fb

qO3Je5T4Yz9AoKVtPEjcTtWnp7CLPv1HFZd4OITvGbKj6AX1LyxFvOLB05/G  
8gpFT+bT9oSfklFwwPxj3AGK/pWKwVTni+Jhxs0v/fYTAsosU4xKvBwP7Jcf  
9nRT8hu4f3PO63o8sMX8Oz9KyT/+Y9oLfgM89GTcP7xIqY/n2ZeK3w3Hw7zn  
KdpPIHrSWVgpVBmPh0xquYY5Sr09NDTKK5mOB/6siQ+LrQRUR7+V7rwSD7xh  
Qo3f7hNQUYZzxBRlApwYILyapNQz82xjMMaVADFtfzvf1RNQhi6zf6VgAqR9  
xBm8vkeJl+ahm6d0Ajj81pj+SukHZ5Kw2bxhAowF9129R+mfN59iDA0tE6CJ  
o+th3U1KfrBBnZv2CXct/eGX5hsEhHZT1AJ9EoCu883z8WpKPk+O4V8EJwCb  
+nLjVhVlXumUV5CJTgBXES5XMqQLjk0fWyYnwErIaZ1iSr9emVAVtcxJgJ7N  
0drpawTEpVEoXF+YAPQKSkdVKJx3eZHvQGkCbElcN75cSUD029pckZUJsLAq  
eoeJwqlOl9nf3EgA4bKWz9kVIPptW2PC30uAT+puqdwUjuAzpb/YkgAJUwIC  
DZT7YinuP+qNzgrQKvlh4ErhwXXalYSJBDjQIm1bf5WAGqN8J3f+JMCzskMH  
ZCj242+6xtyoiBAAnsVCYTOEqHO+bR/uJIBYzEjtLYeGisEERdiJwXZqy86Cc  
V/yz73kaDxEKylmf/KYwu7Vlz4wwEb6UuVtVUPzNro9/rHuUCHb/vb/kQYmP  
mmP4QZUMEWSfxspoUvQghkm10uGj0Mqq+Z/8fwT0azCt0VeDCBoXpAo1KfoF  
y32426dDBGp/yPWi6D2Xh6uVNCGC7eW0Y9U1lPv+R07VGWsiLOPfsdNR8jVm  
9qViyZEImgu6HNmUfFrd0bhi6k4EAf8Hi/KU+1An6HshaxgRpOQIsut1BPRg  
QC8vNJYI98SX+Xko9Y0Xvpo9lEyEEKNDc56U+/DumfV0hUwi5P0UsfpIqbdj  
i+aphWeJoBpvLZRFqc8Koxri2nkiXMEzM3tS7j++m7sxtlel8Cml9mMYZf5l  
8rsXzH2LCI3C1PjllH4hvfXfx91IBCrr/QpylH7c0BW9zNVBhA6JYa8Yyrw7  
l3Kx7+AAEXp7fnmNv6PcJ+cs3A6OEMGgYPnm9gQlfzv71zk/ECGH9idPwGcC  
6vhAFOVclLbqtUp5R+U+jPGtx9YI8JQkFVj6S/K/d36w/LANhH2Xbpy2Hab  
0i8X3JM5mBJBmNZJfZhBGTHsE+Di4EwEeeMQ98uU+Tsl4s0tdoFEaNU7UNTN  
p4wCLQzes0knwmkfm0Y1aWU0/XAvlA2XCft5mX25SsrI/ng7HZt6lImhGFZEN



tJSRDo0MEqtJluQQg6b/WSujtti55yw2idBdMf73n6sykpsrd2dxTgSx7FN0  
of7KSKD7QD5zYCI8uLn5jZJGRUovBBnjqT4N1t7IDlPGdFXZDxgliYCzWKb  
XP9lZbSWuLnAmJMId07I/RltUUYDhI+6DLcSYW3exmP/ujKCquIP+xsT4f3l  
x7h50hXUwmkVsb8jEX6Jc/Za8aaqg6yvd5fQDiXCku0psREMFEWtvbtEuJcIL  
M2/bZ7kqaJXXs4B2LRH6p16+xK6pIN/TghK024lw1/bakmOrCrLxyrfbx5QE  
md+HaUPmVJC0cPQ9aukkmKGM3MxVkwVubIG1LgkyJ0cTqPxVku82/OTVOpJ  
8PJAHJKVUU0Y05MVCZJEEfdrnWoTRXF6x+8tmedBCwVnFsFb1XRctNLIT2n  
JPgnSW+u+VsVfSjAfHYDkqBXb0Xmkooastr783cnlgmExgeeZLiqod6QxqKd  
hCSQOVq+2J0uhhpNjj7+dyYJanb1PDrH1ZBk+5T9v8IkUOCvXqhnUEflEiU/  
/pZS7HQ8kZHq6iiXllnwb20S3ArV3R6vUudsgmXwtiEJLNqNDl6fVkcFirK+  
99qTwK6yt/y8sAa64GbZ4PU8Cfj/C876XtNAPDHT77SGk0BdPegMeUEDlerG  
/OMdTWj4JRqvoaSJytrOG75cSAKjsx0MW2800aEh8ZCa1SToLuAsVpHWQpVz  
94tlf5Ig43y3blaGFqrmfP8Rz5AM03oCY6/0EaoLFoq+KpEMmrLKXaK7GFJI  
v1saJ58MOjshl5g0ATWWokfWKsmwfX5SmZQlqLXXnYneMBkkbmUUC9BoI/WP  
P+WnLZLhHTfRzNVYGz38RT7RYZ8MDEz7Ttid10aPRaorQ32TId3b0PiavA7S  
UVHuNQpNBqbWLumDZB30zLzvm2hsMhQFapvEjOmg58RF5bHMZJB/NS2nl6uL  
RkZlX2HVyVAZNLh7jU8f2X3rWuO/mwykhq9wPEMfva024vvdnAw2jP8u8f3S  
RxNykV43nyWDVV9euNOEAZrNbtnimE2Gdr8yDcYxl+RbYXj427dkCJZ8e9Ho  
lDFauP9er+dXMlDd+TNx6psx+jGzfS5hXwrYjsbxWrGbog1N7NiMaApcunD1  
wcscxRv+9r0oXQKFDtEzbrkWKDdAI+IYlwKeOeLjcBHC7RXnP7QRcCF9i71  
rLCJWiHyXa4ZcZMUyNDd2xZMtUK0z6r371mnwBFuz49BU1aI4WefTZNHCtjo  
qs1rXLdGOfud4vMCUsAqex9jErUNYjm0dNUvIgxecFXtM3a1Qfn4xKfaCSlw  
XN/5vmyDDTpgyrIomJYCzTE+0827NuiCx1W2jewUqKehexCga4t44uXwrwtS

IMgo/tW7ZFtUkv/I6VZJCqD/dg9m3bFFAtVWqRmVKUAMGwuhG7RFCvXRsmM3  
KP7/mRHknrZFBg9KJqTupQD31MJVIVlb5Nr78ExSC8Uu+NQEjduiyOFplaHO  
FNhXb5qw3WmLsidp54/0pIDvJVeSVqEtKv8qeSH6ZQqEDg21vLe2Rc1rZjp9  
b1Lg5InUqKsUfwd2wlf5J1Ig8Zg+68liGzTNcLE8eCYF2KbLz5QL2KCNg+1m  
jxZToNGO3nSy0BqJSIPXev9Jgd77pi+QmxVSJRx1aN1LAA18TovlQEtKAcZ0  
TPtT4XzbhJUsqwUi2hd63ONOhfet725785qiAo/77DTCqVD+rk8rI88Y1QSP  
d9qJp0JTQWb+421DNEI+IrcNS4WkwLIPH7v1kPS9hhE9q1TISnj6W5mliaDj  
LemSQyrkkX8qbzipIfueLbklt1T4yio826WhjMgT2rnnQILBsUB7/02CAiqZ  
91GbiU4FNVIRInO9Nkr7eeYrPikVlvaQGL/aUfTs392LWempUGZmdMmcSwRN  
7B/R/ZCTChJ5Tn3b5TxojXPjp0xRKjScCXb4/ZkZMRwSqEwtTQW5Ko4PjIt/  
tA5JIYuRylSo/DbmMOTe0YnHe/4Tv5kKVS0udq3EzU4T7PStuHupoIrLCZI8  
SNvlbnLLcaCFct5vvjMCVxm7Yk8M0gt3pcKuzeFXn8RYus66rzWH9aTCdPIM  
9bFw5q7rQTxe3S9T4Xn1jZ+XTfZ3tcWqH+AeTYXYDb9X7zd3Owft3B75TaTC  
wxgfZ23fqc7Zs+SQjplUENmxtpuZ2NTavlQjyLqUClaOHzcdrIrIhvj8Gnp/6  
mQp8zWybQc/40bG65bjGP6lQYEQtMHVFFJW7Mp6noSJB2SEZBY5nkkjKU3Dp  
9j4SiI8PcuWbyKNmP1ntE/spdnXHobPsSmgg0nrlBhsJvovWpNSrqqMT8V4G  
1pwkIKgPYFZftdB0cszVbW4SHJrKA61BQBvZpabmwiTQS17i20rSQ2n5t69v  
ijBgbpz6lZWxAWK50LIVIU7hhY0YdgYjdKl0yMpYkgTkgMSH3C3GSLTi8421  
4yTYEdCmo7U0RXerfu1ekSdB8cOtnoFBM6R6i85eX4kEv2a3zk7hLNDTe7x3  
l5VJUMIoe9srjVKf96VoS9RJYMh7t+KYqxVy1Pl+swCR4KiNHSA6boU8hurM  
z+iQQLFdayYw0RoFukaspRmQoDX2jFfqd2sUvah0iWhCgpVmh/IpfRuUEruh  
EWVBgsmr/SH7M21Q1r726SAbEIS4/LsTf8MGFRQkZnrbyCU76BKwy0bdFkY  
SZ90JoHnrsxX+bM2qOoW1dAJNxcVgksiTK2QXdVnkZZeJLAcXnp6N9P1qjl

WSafoS8JWsyGAvXNrdFja6NOLJAE15NUdlbzrdDAFJOnaigJHllsWnoWaI3  
Qa/oFSMp/FtC2obRHE3+OXdbKpYE2G7fU7VCEzSfaWMLSiTB0uPpch8RI7TK  
yb0ukEKcm0Hcy9+e660tirHSg2QSLDtFecRV6ila2cuI5TQJ6Ob31za2aCOW  
DtcvtDkkiA+cjY6DIjH8HD2Th4JEjO5lnrHtdDh0c8yG4UkcAsOPPFsXNJ  
elQNL18kQYKvflxtgQbCLfvGfi0lQZxRb5sViwbSTJQSnL5KgmsTv0/LDaoj  
fYbvj95fl8HGAokPXqoji4t13sPVJAHRU/jv/T915CgawThQSwL54n5XU3sN  
5HIPqa77Lgk0+9kTvw1qoCDNDZsHDSR43frX5rerJop+3rbZdJ8EqnZmlXq/  
NVGKfWLZnXYSLPxrFE86o4Wyv2hpV3eSYHXhJ6sgJ0KF4VTzV5+QIMjyxZlr  
6Qhd3un0Ke4hwQM/6t5zbxCqysmUP/ecBlcD7Fd9Nin/37xGo1mvSNCUc1a5  
ahah1iqmBNlwCQYXQrhzLyL0WPGVcmJbCuef4HGWR2ig61x3xDgJHg7sZrs8  
0kKjPjZ+gR8p/dXZ3edjrIU+vudi8fpMgqunt2UshzXRvM9YvcscCZIM9ziX  
nTXR6lrpCbtFEvCLSI/yLWmg7VTXbbMfJGBSHB2oJmugfayHK/R/Uuqr3SC4  
QUIDsvz+rIvWSTBTRUr814d8UhULShvkeAux9MvL86rI5Fm3zz5HRK8/5c3  
d85ZHULpS+EkqdMgJMAjKF5GHeEGv70ToUuDk/ZaMZmM6kjTpS6RnzEN/nt6  
ZF/rTzVksBAuwsmaBsYNbNysc2rIMkaph+lAGhzEhR3qnVFDjjQbAfu40yDM  
zLxQ44sa8jzXxvaPLw2ELu7iwmfVULBQYtNvoTTgZUnf5z2vhmJqtRx/iKSB  
Z8MHGt5FNZSiTLUzj54GfzPoFM98V0PZT7uvTUmmwdzpffkdq2qoyCrTYEwm  
DQ63jvLfxldDZR8Nvw0ppMFzXmKXzV81VBPIVNCPT401qFt5hVTq6N7mS/wT  
1TSwMmvaHKNVRzR774VjNdPAVlFwC2/OrKnn6M/DhS2C7RRZ1JHtaw/Vz7p  
poFlauB8DbM6+se18/6CYRoYPpPl0mBRR1ZCjN3GpmmgKdY8sUGx/yfGfXvX  
Iglky3Y0P1DWb0gfudBkkwavN6kCaSn6meBkk/3t0yCHVSt+g54yr6qp+Qo7  
p0EZ85sn1RR/foK+5cjJNPgpLISyTq209IysVbM80iDubITZ8101VGJ58oim  
TxoIxMgo0FLi+24fwPTTPw36DtRcOLOhhjC3mF/VwZT8XVR5oUnJT5FP2qRz

eBr8wakpf6mhuaD83rYo9PARnj/73ZKPtSjS+uexaVBcNZmtsmEGspLrL6U  
kJgGSIXehOJhNTRNbiDJPabB+ZobJqReNYTP6Qz4Qk6D2Cf8At/b1VBW4XOb  
ktOU+CS41h/eVkmfSt5qmOdQ4mNZIXI3RQ3JVX4Wp8lPg7PX6Q8K5qihtBs/  
WFsL0+CVUMOf0Fg1NFq3tRF0MQ2U64zk77tT5vkWummR0jS4e+YYw7CRGkrs  
PPD8bVkaHJ/5b7RaTg0NPhNuzKlMg9Il/nkeTjUk+lLqClavBuNvP+ft/6WK  
Yt4QMn7fSIold3bCLsOqSGjG3N7tXhpwzFeqtmWqovBFJ+XgUxqsTF6fH3ZR  
RU9XfST7WYh6Zzdt3VFQRYF7yduKXWnwtulGtv+YCmoTqiune5UGwh5eezv8  
KsjWge3rnSWKv/H+/74mUt6fbgKvPZbToLjQMfWcPgFt+xxr51lLg++Oh+Of  
shFQZTTKJW2lQYnm3ysbFXi0XBgqb8dABkmvaM+iLiWkU0rkY2QhQ8ifa8Y1  
mUroYuVp6i52MoQOqxsVmSkhzXvlbyR4yaBbdMV0eAKHClpuPZwUIMPW+NTk  
jWoc+tLZU14iAxjMaku6hE4IPNyMO7vUTIkxK9MHWfDlVeX3Lo9KTKcjz6a  
yTmpiOSWDOF2yZFBMJA3qf2OIqJKoBViwJHh99MuR2uSIhrZ/8SGRZkMu9+5  
6pkcFFFVcfIZDnXK91YHeXkUFVHsUfXHXlGmxx2bRKvYFJFR88YGnw4ZOMKX  
/eZWfJCAbpOssAEZbtN0JTK9VUDfh808j5iQ4SNR8JdulwLqcpe5ctSCDFm6  
VF7dtxVQwcrCsJQNGXL7fNxbriogz5RqBjl7MjyP0CdZXVBaefZPD0dMBrG7  
JQ5Pzikg+rJDscpulPhmHRPVChTQe+mJO+qeZLhLTiUtXlRAte2XviBfMlxd  
o/tHfU0BEY3sBHQDySBdMUdualBAZmMc1oahZND8xXtLrl8BHfj9lWUaSYbR  
ucfu/80qoNXfZ7osY8lgsfm604leEXWnG6zbEsnQtY23uiejiC5w7pNxTCHD  
9PaF+kaKPr7XHnm6kskQSFMaF5mliFQVkkrdT1P0ElrU2nmgiJgeqb72zqHo  
YSNb5rGuiCbN1+kD8inn1bMer1PCobrJBq2QlJjYa+PSf8biEckNDqimAyT  
bLpa6o9wyGZb+nbMZTLliy/8LGZRQuJnvn5OKCcD3dnnajynlFB/jbsluYYM  
limf51o04tFlgyDp07co64X9E9dj8Cj42fjDnDoy0Gi8oC/8iEccMzbS51vI  
QOTr8+DvJKCZcHaPSx1k0F6+5ylGUEbNey8uXekiw8lg7ofPGpWRg7A+XVUv

GRzPbnzY/0gFSd6h1rw5QIZa3e7hXnNVtK3eFXlnkAzOg7fSHWZUUbmjynTz  
00q86re0bgqqo/nzUg965snAfkMv9GkidpE538+XyKD0VdYT3fXQjkN1yUH  
l8mQ0v1k1Y0dlbkhweJ3G5T8X7EM84/CUCwTW8RX+nTIU/pP3U1SG9GlrR1j  
lEgHvM/2v73DemjqI0D1tnQ6MOXAiE6KHmox0BX7LpcOkQF0jhmTesiX5cLh  
lEVOKLlzc+0s0Ue9lwh8Fw3Soc/ZwCCFxRCVb58sPm2SDnzcZff++hii2JOn  
ueIt0mGX0fxNcKchOiY2xuFinw4yl/pOZfkYod3MvXwz53TQr71g++m+EXq3  
IMGK3NKhePEpb/Y+Y3S6Lp7xiG86kBYsJaSKjZHbgWtZnIHp8E2kfmfogzFS  
jn5ORxuaDggJCR3iQialbexn+npEOqg0y/6360SZz9QEaL7GpMNStsUO/oIj  
6irTlb1PoHzfcpKtYsAEFe8F7j5PToe1P5OCXDsmKNTzfNKDtHTgZ7MICjpu  
igx6HmzfyUyH/Ebc/xiu8ngo3yCOSipROZliSoqQ+1hrzK77yE2KJCSpJlJ  
ksTuYu2u3aXIFaWQkiTJsSlckhQpilSiREUllfR7/5zP+zzzzny/88zMlxrr  
6QCKm4aj81MS0eSC+IjCcUJPM8V/prETcV7eztyNuQ7QOaH/3yleInb7Fl8O  
r3GASy47v0WcTsSMc/u9uh47QNwN+uGgs4mouU7jvcJbB/CSLf/imZeISYWh  
udpfHEDrWO9Bm8JEZPaX3H097QCir+Y+GV9MRCVmSLbILwcYhI2h6qWJqHNw  
84HwHw5QXej8YfXVRCzCI7FC4w7AmR8dvPR6Itbb2noKXjLA8N6C4bmqRPwn  
I/ddqs2BWJjaAr7WEPiXz278fNUBZDUnh97UJ+KHW+ZOuhwH+Jy2ald3YyL2  
9qk33w9xgjYpykBzcyLm1C4cZZs5QL5nqE91WyL2CylJh4s7QFQNV6+4IxGN  
3RtKXJ/Zg9Pqum1nuxLR21tNRC7LHITj3j1j9iTiUPXVEyUe9jA3tMQj9gVR  
TzIZ0R8W200vhf7Tg68SsVJe1aWhluB7Eb3TZTgRO28cWVwnSvB94Koj9QPB  
T8a94vLztdM4+Fm73ngietx6d6bDyBZGMlRbZb8n4p4dTd/XbLUBwU8nK7GZ  
RPTZJPN91SNrOLPjaNOvPwR+T3c97rWyBmultjuv5tHwkruoywZlK1BM/GrW  
uZCG5dE/rp1KtITp93L1d5bQUEZ6vqPeoAVcKttXc16KRui5S1c3x1JhodGS  
6yHradhT/LNodz3AJukTR2Q30lC3yZAJr20G9pOfDZrVaRgjb2+MNcUOGVP

a9fq0nBuVezu1buNQVYpu7kXabg4/trVoXwdUF2k9sLSj4Y1K4Xt0/UXge1I  
dvbUbhouS96jKbLju1lok/jOgj00bDTfLcvofNdQfuLrmz8HaNjBcrn5p265  
wHDq1qfK4zS0nDaOF/LcJPB+rFbuf5KGG26ee99B0hDEXMkJl0ikIYwJpwUv  
1xbkpizVq2fQUI0NXHNRYEg+OSPfUwaqgz6dn79rScYspi8tZJDw1/wg/uh  
xUAgohwYc59Hw09uj8sP2RsJVOZ6yEd00zBMVo4edcxYYPXS+p/SWRq2019F  
TNiYCIJrau525tLwed7HZ82lJoLk0+q02Alazu7wFZ/gmwguR+Raqxfr8ORt  
10ivn8aCDmeJRS+Kadh9c2T/ZLuR4LNG/EN6GQ1DHY1dy4UNBcsWT7H1rtHQ  
Wrro9EOenkB3NNDITSUNUzLKL79r1RZ4ND9bkVZNw3tL3SS3XNssiCq0eUau  
paG4vtSi1pwNgqy425ljDTSsmFr1XvK1ouCVcd4a6/s0tL05eJ504VfDnlzk  
629tBJ43KnOs9X+YKX2LLyzsoGHvQH1mf9AyCLoopPq3m+DXS13N+6cyMJi9  
Hy4/J/B4Vukua6YKJXtty7xf0pB3xZaz0FAd2i1rD4q+pqFSxx3xz5NGFfW  
0K56S80tUnNsEWLeSvzLm9o9QuDRW6RT+lChtF9J3pQco+Ea9QRXdX09cLt9  
6mjDBA2vLjivLqulD5FvnpnsnyTsgGW/Z0f04cyRPbNyP2goT+qbDdthADUu  
zwUtMzQU1r+kfoFuAP2adqciZ2n42K509nqKAcwurrNYJ0THn6T8TXDMABQ/  
alh2zaPj+gkd86fbDQDv57edWEhHYevlT2a0DSDg/LLUzUvoaLr5Yxh5vgEk  
nkzY2idBx+SE4NKNffqgMly0s3cFHbvabXiNlfrQbNt6sFuWjvp69LHBHH0C  
r48nuuTpGNraVMIn7PkrxDmPF0kYXuY0KX1TH4qitPLb19GRmrFf1+2lPli9  
dClvVaWjx6WYnAPiBjBifkTQrE7HgjfHNYjsDYBRdLrzhYdpawPvTdoMyDe  
S82gQJeOdd0eLWNDBtB6sP9znSEdK5gaj4+ZGULI09m5Ghldh0Kn/70vMgQx  
o7WS1UDHsedH3M7LGEFJdMxtdSodx1+vLruZYAR2QkFbKqzpGPA9jmPw0QiY  
D0qcLzvREahRP2LOG4061sNdxW50LD6++Bj+MIaH/iIDRV50jLu7PSmCQuit  
n5LxhTvoWCYVpLQ8yQTEfXW5+X50FL3j/U+d20+vNHoU5ATQUSa/YPHrfyaw  
dcPRiqxgOiaGhIzn6JPgc8rZxtOhdKQoVhTtDiIB53NdFz+MjpZ3juppp5FA

y31wKC2CjtkOd7IW3iTB41tCk6woOto3MXpGn5EgfM16YWYMYat2jnRNkmDZ  
KavlSXEEHttLSpvETKHi/V5IWgLB39jk6zWrTcHFnlzikHHi6njM1ZqpvC1  
/AoljklHY+noB8f1TIEn9dj1OIfgyydS9Y+JKehGT+6O5tMxxvjusJCZKTx9  
JRXx3xk60hOg7wHZFCIohgkR2XRswtbxgk+cX3Hjm38on467a+1qsgH/IYuP  
nz9wno5pXpmOcptNwf1QXuW+S4S/+oxQJyVT+N59517wZTq6NimPHpUyhQzj  
t08Dy+loR1XMfDLfFPTz5r/zr6QjZ1moc9Z3EjwT3vhtZzWR74L3w2LvCP39  
cL+Ut4C004LR3/31JMja+cPdsZOox9mc1WOhJDC+tzLI7ikdTya9WlDsRYI+  
VVKkdS8da6fsI79TSRCT6kuz6KejvEyrqaQ2CeS/xmXglB2f3tfW0VckQa1H  
YZHZWzqKv9qrVrCUBD63m6pII3ScGOouPE7ox1mFkWajMToKuQ/XZxD6OTdB  
7Jn+ZzreDTAKkiD0OHU/b3OFJH/l4Sj8n0mMOCw9YfWNB07X8T2jj0m9HjF  
oQUav+k48rff/3qbCSjK8GXU5oj3B+7T55pMQHCsaoOqCA01j+VEfWg0Ab/B  
XoP1ogxU5+y7W0/Yc9RfVqLgCj2PVLtRjw/V7zaS0GCgY1NYQZdhD8ml+ly  
73IGHmCsLWrpMoHIPd/m0mQYOLy8xqaA0Kd+lrvC7VYx8GbP0C36RxOwXf+w  
WESBgaFmVNa53yagK2I0W6fEQFYtzVdWkgQKb867/KfCwKu1Lo0rNpJArFHi  
otYmBrpfcXJuIPCcyo/5NbqZgUJzqoUQQIJXJ0a2Fm5hoKViwtY7dBK0+Lqd  
36HHwMvHxcb3XiVBhalgWsqIqJagPTuPhLkyKs7PCIxULbE2K97kSkwfp0+  
xwAG6nno7R4FUwh/IfzdnMpAzs/fVfejTcHyTF9upR0DPQb5VxP/mLWf1aT  
+7cyMMwt+FmFBRIWeVy32uDKwN5E7y8FHDJ8Xp7yOdObgbPjl1yKNMwgk22M  
J/Yy0GtiVISWDJBwoCjDcD8DxUc6RX69BzjgsOzjlzAGnl+XdvaXITngog+8  
gCgG5trQPt8VJcYqLf0dDZ2Bey50xMwfQOgJnGcsnMLA56aWR9JlKHCHeohV  
yyL+nxOZ7ORMgQwhGwPNDAb+dlilS26hgFnsNGPFBQY6Hw0/l30XCpt8A14+  
vMTAX4HpOTrzLGAFqXML/TIDuZS/C/qtLGDk58UXP68z8NDWWYFqpwVwj3iq  
DzQycP2kcsaKl5YQ43Y37kwzEe8TzWi1NVYQpKPZ7dxG5NcbQ9/oawUmX+bH

3nvMwDudqW93vrAClc7wruPdRD6Jpae9pa1B4uorFYpNDJwcrDO+42QNb0Or  
HhUPMpC+JELGU2ANHXZK63a/ZeBE3qFK62/WcGsTK0p+hIGwXUZUTdUGWCOB  
a9kTDLzRIZ5lSSf2//uPj1hPMIDEusYEr9uAf5Fp27/vDDwZesf7er8NGARI  
HY6YZeAuo4xn0RtsQVXmk/gqoSQsktvFnrKyBdm2eyV35iVhKE/BgB5oC6LH  
sy2DFyahM000RSrOFqY1I4bElyTh2EsXk1OniX1wyC72hkQSdkXpJVeU2sLz  
dGW5HSuSMNf0fRmt1hbarH/dEJJNwgGjvLyhVluo+dXlXLwqCWFxW0xtly2U  
XCn5tFUhCVVsR+ZVd9vC2V3xSd+VkrDCNiLkCPGducJ7fY5KEk7n/kdOb7GF  
mPtb7lA2JeHyU7+kqgn9Ehq900fD5iSU1VmYGJtnCz6bX09ztiThso/FCkkn  
bMFxsJpvoJeEa94PH43ytAUyj6P1yjAJ/Xa3bvikYgsalsHtCaQkfHvWu47+  
yQYUfpoFq0ESlrUXdoyU2IDEZRmRLgoR/5YrE+W+NjDnO5EXZZWEJQtOVcaJ  
2sBnyfsmCnZJuDRZ7dr0RWt4fS/3WZNjEn5gfjl5n2QNjZsclY73SMlDs1+r  
xj2toOLl+tJb25JQayXXJ3PIEgo5fyz9fjKws01iDznUEhK+X44tC0jCc5Pi  
1w1PWIBl46Jxq8NJeG9n7Tm9mxTQP/ImaTwyCa/rz++asafABtXb690jk/Dh  
hclE0nsE2T7uHZPYJPTenPOvhFhDRVkhPkMnkzDPYVXSdzWEacCfjMQkXJzl  
+v5gmTmMTq5M10xKQodD1/P6l5rDi6lvWj3MJLzw2WfrgxiAtm2t7TGcJGz8  
J/gzO2UGNYvPBSvzk3Au1bbC+KgZlDZEibSdTsk220AlczEzyA53yg87S8RT  
x7DruUQG5npVkkxeEp7XXWIW606GmN6/z+oKkrC2ne5RJUmG0JRnhwOKkvDs  
QcykvzSFHeSrSxeVJGHR/Jvik7dMweELrfRaWRI+OOZaf/uiKZDP+1p5XUtC  
3erEq+cJW8NT/81sZRLSLtweDasxhTVi4icuVCehxebdEW8GTUG87p2cfW0S  
/nPQYefjkWH2YF3V14Yk9Py0S1zDhwwTSukumXeT8NqJvI1DF8jQyaAmD7cl  
YfP6K4I1FmYgMJFXSe1IwkdLauJ5mWZwbXzyjk5XEsalWewfmDADrlvhz7jn  
Saiwwtm6OwcgfsGx9A0vCb7fLzqxbxLgcI3Llo7BJByavR1yzdlc3BSF9q4a  
ScJFhYc+rRsyh7veyS6SY0l4aKyF8U0GQTt9GWnB5yQ00fPr7y8jhHOPstb/



mUzCN8I7Y995IEiIKS+d/EHwqfHqveR+hBPU0umRX0Q8u0gXD8cgjMfqDL36  
S+CRfbRWLBHB59btB0+Fk7FiIH3DM6le2icpN9oWJKOwWtpI70kEE432XMGi  
ZDwau+/v0kiEkma3RtXSZJR6sS40ZjfCysL+Q5eXJ2N+xE0pZTsExsuA7QUy  
yZi0vlqTpo1AuZ/47+iGZPTJViz0KDaHin9LPh5US0b1gOm0quPmoEjKeBqo  
mYzzXtw303M1B3bkmvrtOslocjUQRzeaw2x50UVng2S0iS0biRQ2h/0fNdKs  
TJKRfayuMGYQoH/9zWhTs2RccjH98IwAwM7PLECHkox35/S8Pp8HqMm677DR  
KhnLGbnOvkyAjd1bDRTskrGb/Ggn9T+AM0t7FaW2JuMW5Zb4gkCABbZ+Yotc  
k9HpoW9JlCdAZMLI5JxHMhaLf1Wm2A08qw97+d07GU8YZheUUQDcfl43j/km  
Y6x+7NwnU4C70ifLh/yT0XmqWsbYBED7wMKs3qBkvOCzv/E+YZ+7lHaqlyQZ  
1/nWvmg3A5B4s3L/vQPJGPO62fiEFcCJ1QUeNeHJ6P6krHaFK8C45yYoj0xG  
XwWu8V1/AB9uxcai6GSEa3yWIBKgvD14eXZsMpZE9HCRDWCy407vtPhkpLpH  
rT1xGaDE3G6YTkvGWvLZFZc7AFbGPHI0Pjmw5f0s/34DYFRtv3WYIYxfX7zn  
XFEyhx+f3xTs5SbjgkDXjgk3cwhSC2XuzEjGS0V3e6eZ5tAdOHXEPSsZT6Zs  
S/7bZg7U/JiddrnJmDd3diCHmL/XX4jYmBckY90PuqKJzQhKUqnaBkWEP6Xz  
omlEfaZtlZLfXJKMpG++X7PjEeaScuYpXyH4fj/rpFGBcPDe+gnZimTs3c+X  
9HuH8Gq2rFe8KhlHZzXXOshTwMFIv1GkjhktJIZCJTwpUHu4vnSmLhnyvNx+  
fS+dAlkjHbHDTUS9XGsb0VGgwkJlz+D+1mRMGfMtzAimQpTPgHPXQwLPD97F  
kZVU8OiaWFfnYyhMbvY8l0tQLJW4kH6O4KftcwQ46uW0BY2NG01SuDjIJD5  
cp4VxK+vVjKZI/43lHWBR8zvKZZnvO9UMu4rejWjTszr3l25RhuEUxDnBtc2  
5dhA7gL1S9WKKsif8aRg6WIH8Kz90x2yLgXbVEqWMuMdQOLQI+HVqik4+Jf5  
+dOMA8S/CN95UjMFX4joVHp8cYTAslvStuQUHA7i2EZ8cgJ1V6vEvu0p+LPi  
evOdAFd4t2DI9dSdKbjiXOuRwDxXyK39MGi20wVn+9cFKz13BQkVFul8SAoq  
bl5CzrNxxg9YX00M8DhD/N7S7YRznBvHsLWdEw1NQ9aTW6aIbbjA5/XQy9GgK

dIW5NBbJu8PlsqK1CsdTMO8s5Ek7ukOaf9TWx3Ep+L3UQFw81h16Hqwq1WOk  
YDC5sNX2uTuw4z71vk9JwZGbLcX7RDzAWq9hfhY7Bd/abaM82OwBNbn+/rMZ  
KahdsbrtT7QHhHbV5ZRnpeCPY0J2l3M9QF10fr1/bgqu2lp52UngAe9qn31c  
UZCC2y4uutU74AG5h4pX3r+QgvXyLwy0/3iAp8oxq6PFKWgtnHJCUDYTJPrs  
j6iVpaDyQE92oJYntLDXFL4sT8HCyjnxDxaecJL6uZNdmYJqDDv3DC9PMP55  
Z9a80gWX+s6MuwR7wtcynvrU7RS8Y0y0XfSIJ5T6B3oXNaSgvRjnzV6sJwTI  
GDC87hLxrPxz6W+CJ6xuf60Su5+C69a9YCxeEJP3Is3tW0pKGoVYiigewJb  
77LkwY4U9KF91v9yyhOsPwx3W9uVgseGrwqzYjwhTmWuRqknBeeVIIUGhXnC  
Tf94/XUvUtB4YIns452eMJ4rUrH+FWF7vFxZbusJkn20zRuGUiBpQJX2jsjP  
R2Zhseowka/tnzDXZZ7Ad01Zt+kDEd+ePeN94x7Qzl6Srzaegi/nRyzb1ewB  
wu3sVZu/puD7ac0v9854gLHostMa310Qs+RS7migB4RT+cu0ZlJwbMWoxjWC  
r+I4adaW2RQ0Hfh748+E0wzWnlmoI8TEDNJPq2uX3UH2p1yi7nwmiv55PV22  
2x226uXM6Ykxsf9zc3/3CneoLzv3w3AZE0crqlM1A93g+6jyYWNpJgauHYhf  
L+IGm1WKxk3kmPhXR01lJscVsnNL3pGVmLhDn/8kqcUFjrKvP6FqM/GdE21Q  
eaETID/Q22qpz8SFN95VXVfaCiMLqtusjll41W3+j3kkR/CIq71ji0z8ejZ  
XPKwPbBqyab2lsR9hUHFlgw7aJoWVDvYMvGJlFdNdaMt6B5quurkwsTru7Qi  
zhvZQGizlZqLBxPPKjundtCtoXC0tcjVm4neIKXAeWsFL9bbK7n7MrH6U/+F  
OGcrWObfkePhz0TuLtFcg05LsMI1WukVxETFrh+n7P0tle5FF39bCB0dXL2N  
5UUsoVraXWL7ASZuS1lffuqBUy4PEvZEc7EEhfXnMwAC1Bhb1vgG0ncv2AW  
u1HJAnwf9MXvjGZifuwazZfvqZC+wHfWL5ajxn2bp1RuUKGdMnjUP56JnVWl  
kkeTqCAS5/9tN42Jjkt6HlgEUMGk9m1YYDITb774EPSXSoXw6aCxIBYTv8mp  
bpBVo0KJ7uieYC4TRerz1llIUeF12L43ezOY6D5yz05EiAqyZZ9892Ux8XZv  
jf2JzxRwGj34ljSXiZVaD/oGBihAX//V/UABEx+kmZVtfUSB+l0Rjw8WMTE2

Z9eR6ToKfM/5bn+ohl236JHhEspSPlFVEv4FSbWGXFxnCX6dYD0L0pEBROd  
l9bkj8ZQINvleMORKibeEHW4IuNHgSesv8b/1TDxfZe9Z7w5BXCBIHZ0IxNH  
+kvvL1xAgaMUWtmxZibRDxaxVT4ilJ8Q3Xi8jYlHNJL9NnYiKEwvVozrYuLJ  
++/Xvs5G2CH6a+hADxN3/hEkzyP2nyzZ0Qs+L5jYdLVLzOsAwjPVZ8H2r5io  
3Mg1DtyGsMKoSc1kiInWhtuvaloiuNhCH984zEStZep7b+oisLeduyb7gaiv  
rfOCf68j9qe97Igf40z0/zJcOiuNIBZ93OD7FyYWfu/UrRdDsE7eN/P2GxM9  
6hKEI2bNITFrW92Tn0zs8UlvYRwzh8YSq7jGP0wMV9P75tNvDnM1epRr/4h4  
E1+LJD00B/ID5fn581KxcF/WDzmbORzrk2xlUwlBuXOh8srzaH649+U40tS  
UfvlFtphYt/6/uuTY6hkKkYFSygz55uD7uj+ye1SqbgI7lf+njPmcEi+7anN  
ylTcZxymOZtmDlfUq08brk7FqaB5Osqp5jBGKvLesDYVWfZzDtVJ5rDjgb9a  
en0qvtWSNTxFN4c9PvGDlhtTMX+bSLENzRz07w8rnFRPxQOLY7weJ5rD0HHf  
oCGtVPz00p8dIGyfX00xBsNUHFzpvKiYON9bLx2eA6l4bYM4q4uwpR+J6DGp  
qfji4ZPmlYTtOvD1R7R1Kta+20BNTjAHzsRgzV77VJyrvFM3etlcOv52HPdy  
SkWXk14f/xD75GKJOrByS0VvTmECM8ocbBRLhfW9UrFpg7f59kPmQNPkbf63  
IxVNU3Weawabwz2gJy33S8W9898Ld+4wByHnl/ZCAan4rVft6D9HczDbtXvp  
lz2pyLa99TmJbA4xh5y7Bval4kC+pZKmmjnUndRL7ziYislrU5qqVpjDdNpm  
r7rDhP9lZ07wDIBewapVl/9LxdJqaUh4CRBesfBV1jGCD+92mnstQHnjj/yk  
E6loYSq9RvE0se91vdsddSoV7xWV1hXvB1B780RID524309ZXU3si0XC5Zep  
7FQskdyX0t5rBm+X5x7U4aUirWrb2J18M1i7jqmtdDoVHVtleUmBhN6iBlf/  
zU1FkrxWgto7Mrxw8zg2XkDg5Zh980keGWQCqeSXRamo3zUn9MGDDNxExXs1  
V1JxpuLF9d+EvupMF6cXV6Riy7/dQvcDTWFJ0W+bM1WpaE1bYnJ2iSkwmnsf  
HalPxdfLR0l/nEhwfEFan1ZHKkocf27+odAYRLgtQ32PU9FJRppj54xMOXn  
RmndxH2Ssm1zoxFkbTk43d+fitTec/efdhpC9XYHqaSPRD1rPXk8e1MfyDhB

XnciFeVn9HtsVfThflit8sBXoh6vOel3s/WgJ1FNW28mFaWXDTUquevC5NWF  
W1+LsvB5uZ7cveQtEG1s7sFczMLjucyjliQtEGqK8jGQYKG94fdXoR81QOLF  
+32pMixkf0/TyaOog4ZIM8NIhYVxhgPWoUMqsNcrvjGNwsIm9nN++Bpp+Dx0  
q5VkxcInc7dXhYUth6j9Xzrf27Jw+lnq0znGUqDF+w2YurBw9tT0+YJJETh/  
mfx711+Fyd25PxdYdzSoG0QKpwcQ53tlj+KcPzVcv1MmBsEsRI1TuRtLfzY0  
9sivzDjIQkNf7h7efwsENrvcFM0Ps1BoU+Gaq+KLBZ0fUzaMRbJQPnC4ihkj  
IRiYm9HDWBa2P3l3+WGIICAoRdv000kW3tbds07VR0YwLhVCPZPIwtCUt+F7  
9VcKjuSfs6MksQj+vkse/iYn+L3pucs4k4V63XrHVDLlBQk3JLwzOSwUVjVR  
DVRcl1gE1ruofBahl/04EskKAm7bieCj0yx8zJ/REetWFMi53zyYdZaFHuLD  
iTpzawUFA+ORFnsPLR+9p8BTUmwMUQl9nMBCztmRtIcZ5QE5VM+iWeLWLh6  
ME7r0Q5lgeGjdKZlCQvXb+ZmbSpTFjQsfMj7UsbC/UajzMcflAWWfjGz2ddY  
eGeHyz1dqXWCjjWkAqsbLOwdz/xzT22dwL34cPHXahZus2J++7p5ncD79vbZ  
sVoinqh9xXmy6wR+Dymu7wUsdKg55Tg1qiwIGlC79PoeC+sXP9cwPqcsCP2y  
/E9fCwtVDx7k15gqC8KFfzv3tLNQ7LVta329kiBK6m1RZycL3+w6KMNRVhLE  
bmj/1faUhX6DDexPTxUFCUaVTk29LDywY9A6ZL2CINku+0JDPwstjwntfiG3  
WsDxSZi5NcjCNXmrX4eVyAkyDoZurXzLQtGPZ+jKD2UE2Sfdzl8ZYaFKfj/c  
yLEVggIe6eelMRYuW3K6NshnqeDShXWOhZ9ZmG98XmtGMF9w5ebiwpwpFjrm  
u2oOK003XG+d+nF6moXxE/cH4g4VNFT39dtzf7Mwwd10/3DUT7P6T/fOMedY  
GKvrq8z4LgZtkul2J0XZiHd/cOapriZO5eP5xxazUTLunkyakzL06AV+OyLB  
xgrNb/F3RTfa0Da9vBBZNp6hSnC+WGvAyL7VUwHybAwe/bnWu2ELjB+fZ7NT  
kY0NnKDNaxk6MMX+lLNtHRsd7uH2MBk9mDnX/dVVIY3gx32im6wPc9frrBzV  
2Xhc1z1WrN8A5jdfyLbWYiP94PSfN6JGsLg39QvqsjGm11midaUxSH44Ymlq  
yMZq2reJ08tNQPq3z1kDEhsf/VdBevbNBOTFLT9vATaSiJ0zJBtIoKSoYaFO

ZaO4bGX20QOmoKotnaVizUb2nYwJGWEyaFBnxxXt2biosEPj2zEy6HoMU1Y5  
sbH91qaZlb1kMA7uOCPlxkYF4egvLGmi4UZXFVrqReQTK1K5Q98MLJm5KLaD  
jVsO8u1ZhG2fSzt4sfGDS1Th/euNQOX8gNjs7vZyPlv//XdQmbg1ehh/nMP  
G7V6/+TK9ZPB9yk5Y3If8T/qhTa1a2QIGFb5+OkGzfk7m7TTSBDyLQ4jBwm  
4ivT137iSYaDYj/4Q/+x0dxXleO8Bhki5AdG+4+x8RRNPtlyERmiNe6Tn51g  
Iytuc4HHZ10lg6u8x6el/110Dg8fNAWay+mRB3Q2arozWAavTIEZcMK0OYWN  
t8c2Zu0ZMQVu5B6ugE3cX3lC9eNPUzjD2Pq+hsfGS59DqVeXkSE3y4B04zQb  
F4ZPfrquTSb6mULa1bNsLM9Ztv7nNjKU1C8YLS5jY97httFYBhnKOyeMzxeY  
8cmkHMmingxVQ8/YuRfZuHWNiLz9LzLUTjW8PVPKxqVBVvNnSGbQOP+SEe8q  
GydELrnfOGYGDzdFvaHfZOPy6bad/eNmIH+zOIZ8m40PK18+HIYACKX0SX2r  
Z2OV8x/WVweA2keLr5Y2EvXXsfH03yiAxTvI1v7NbBxV2/1hyTmAHSMHX8u2  
sfG6f3qoQjPA5Yhz0Y8esvH31rs6h0YAfs91Lac9ZuMDJWqBoqg52KeKlJG6  
2ajYJ109eb05ZK/Ut5zsZeOvKPKRM2bEPnRhZ0BxPxt9ft987udpDiTtzCi/  
QTZSAxPe0ULNIaW+TVLmLRvLrheeETthDi9sf5c8fM/G3PdSkx9ZxP70bDM1  
4SMbL2RK5W3JNof03TtfGk+w8eXvNzbLL5pD2wQn8stXNv7XdXFP8VVzkItp  
XHrpOxsDRXWqhKrMIUR06pLvDBuzmJ6Tm2ul/YO/HqVm2Sjm8L7fqNYcFq71  
7Hvwj+DPoFJLj7C9yhgR8fM4GGzMuaxBnL9kVLPEaCEHTSgO4nqEv+mmjOUT  
izkoBXXLPcvNwdplNRRJcHB0TUV04SVzOPPK8fmOFRwsefhnTjXPHEZC4sKX  
y3LQzjg84DvPHAx/XFvUtoqDDS6v/eWifZB+6s35OAUOzoqsrikk9q+epVjk  
A2UOfif/2HC02LdUsi2ffVLh40lx85C1BH7NlcULt2sQ/oPCdr/TJPY/874C  
SW00Ci+aTreUM4egh4tJLXocfNpvwA8UNod5wwcP6Jly8Lpgw0eZLgCqjP6T  
pfYcfMmub/rgD8Av3BPavJWdaUV/ZJ9RAAd5qZs477spBT+8ElR/rARKsfxt8  
80bgG6fyPUuGzeDu0cbse3s5KBLCSJ3zM4Nl86f0ju3nIPtmo3WimRn4c9c/

2nKlg/yVjl5r1piBUCnjX24UB1/17Jl42UcG7HcM0krnIMtLanvzdmJ/Co77  
q5nCQeNQS+m1pmQYmrp2ZphFxDLdoZNUWBTKcXCL1wDWDg60lZJN33hH7VaZl  
gFgWB8fpMgohbaagqBL1R5DDwfrLSvGy5aYgIPdpalzg4Kak1uXPYk1BOi9K  
ousSB/MPtK86EWwKoX+lvhy5zMHLar3FB11NoXHn9ccryzko/9a14raZKcgK  
nCrqrnPw7u2ijZGbTeGA4jh3100OhvUYiFTIm8K9uJTD825zcNLzgh48sc/J  
vVZ1K67n4JqAa5U//5LgoHmzrkMjBxvXBB9WmyLBvXO7pb40Ef8r/Rm06QMJ  
5IT+feO3ErbGw1MLh0gQ5p/bY/iQg7wHNvV9fSRobjS52d/JQZ2iHrHKZySQ  
V35+Ou4pB1s2HppI7yZB+KnIqHW9HAwoNsjeT9gtb5Zva+njYE2Ik4wNcX4N  
9ZpR6AAHs/yE/hgQ/iLO08pJvOFg13H+qM1rErSjJM1cH+ag1g2Ho6xREigG  
JvV5fuBg4s8Iayki3sgmldpfenziYa+o8+WmOB03r72XnfeGgbcRGaVUJU1Ci  
7TpO+cbBbRyqw501phA1POvzfpqDmQmjun/1TOGhZTY55TfxP8rOvbftifMX  
jRQ05zjYKxijyQQR5xc8+9slnIbx470bleNNNoWNPxGDkgjQ80xAy/infNa1  
SN6RW5SGH1RGw+iNphCtevVcvXgaWsqcdfg7TPDPsI/3X5aG0afuKwaKkyHG  
hk4pWZmGl7JKVxkFkaGreN06x9VpCGpfjVnkEFVrFHkq2lafhR6SllrI8PT  
tt9NRqppWOOy+9hNEzPYpJZV9FKN8Fdequx21AziUgzoJzXTMFmx6Pz2GjNQ  
sw+3btVPQ4HQw30JlgBxl5du3G+chnHedA82F6BncdlCSXIaDrKXur96DRD/  
8H2blwXhz/dCflUK0c8cfRxGXNPQtFEgSy+eWNOvzmxmeqbhrdbLI2I3EGhL  
z4hrbU/DiQcXPxwbQdDu7Hr0n38afp3Sf73SlQLJztYuCw6lYYxlRvZ8AyoY  
uel4qrDSsNKJtK/UwBLESScTV3LT8JtxVknvCUMKT+6vjgJDbu787U9HlIC  
8mSIXGROGp7rLvmmF2oF/dyC1oayNHSf1xRpeMMayqM//6i4loaPY45ZZYjZ  
QKI/WaXoRhr+WzFouHmXDWhov4hn1qWh8omlynNLbUFITvXaiTtpODZCEfH2  
t4Vn/44MhDcR+GwREcort4XLo3eXBLWm4Zfr63aP/bSFuMeSpG0P07CndcXL  
OIM7cLu1M8T+cRp+ekhZzz5mBxvPlZ0x607DUrm1X/oq7GCW8atZ+3kaBovJ

f1d4YwddYTbf1r9Mw4QfhaM9i+yhyOu08srXaXiEpHoyRt0eouGd8+J3aVio  
I xvOpNqDo6p03N+RNIwyeHMo3tUelCVOXvk6loY+BdN6L7zsYfpHR/+7z2IY  
1XH/8FI3e2gfkF/0flrAX1owmEPcz78fYtQ+nYaHu520/220h4ir1Xsafqdh  
ScDo6hvC9mBzen5GxVwajq/56aX32A44h0J0FebipldH+tk804jWdYl2mMfF  
ezq3ZqW32kGA6lFJqwVc7GibTjISsQNH+fxLsJCLKi/mv108bguGEvfNjBdx  
8cqZG5Hft9vCkukVBzYv5eLpWdPnktk2MP3RZN4GSS5WLq/9r0THBoYG/LMV  
I xP2deWRniZrqLpf3rZchosWB6efc15YQf7tZ7uWrORixvTCjYd8rCD56uz0  
/FVclBlxeJfcZwm+p+03zKzhonr3DZBos4AFe0ZODapwscebK7/zCAW+ei9d  
9UKVi3JBNxed60Pod9SveLKji0F8Xa8IKkK5fsJgswYXq+s9S2KIdS9rU+l/  
Ai0uUk9SvHdsNIOENV3iNdpcLDvd5mu2hgxe8xVNy/S5mNCR/ndCgwQ4Y/m0  
yJDIP/LRSJmDCaiP79+Xb8zFZXFswdbjxiA9xBfKlnHx9VWnMocGI/jXfTuT  
R+biq5bUbgUpIxhrHdJKBS4uYt/ZSY4zhJ66hS005KJZc1D4WiFDEFzT2hlH  
JfDfMq1jnm0AJRc8vx+15KJu+uc2KScDuOVReNXZmotj864kx641gJYFE8Eb  
bbkYNvfnl2CRATyrNlb6Z8fF+9sC/XeKGcDwXlpfrwMX9b3zzCZlDOCbXBe/  
fCsRj79Xe7KuAYi0r3ZkOHPRe95aF10/A1hxf08CP1cuBj9JkpvNMgBljRsC  
A3cu+vkkqH/z+1gC0B+aOLvXk4rRBbKYa2RCQY6/z3ouL879uelNaZaj05mfG  
6r25WL66Jj1xjRH4fX1zIWMHF1vsa2eaLxjBwULNnQd8ufhWonF7LMkYYt20  
yVr6cTHv13ahmiFjSJ13//Fqfy6m5coZMs6YQHbVspRvu7nonsKy/OFDgtI9  
vtSHgQQqrtb/SemYQo1syZ/ze7hYxehd/kWGDM+jzcPc9nFx9cn6qpWSACNq  
qRvV93Pxd5Ce0yliv5vu7x0SPsjFjyUcseXrEBaw1mX3hXHx0oZX9mmXEKTN  
wtyvh3PxxuhASqM8BdZ/vi2eEsFFgy/p94viKKb7bkGLfyQXF5Ln/po+pQDF  
xfWkcRQXjTvX6DFkqOAinGe8LjrI9+KXoERbKuyq/DA5eoyLN+5Fpevtp0JY  
oH7ZneNcFNpQKThzggpx0vFBmSe46KoZYLUngrs+w8VDp3kYsnL2APNsVTI

jVr53PoUFynVQSqV/1HhysZArmlIud8Nqw6qEv7qXpTbTdO4aPQ1x1p5JxXa  
U36LdDK4eNb5U8V5Byr0kazrLyZz0fzlwiuXDanw4RPvvxNM4r2nTxqZKFLh  
Z+6AlieLi55HSzycRKgg6qT2QYPDxUO3FrkovKOAzL/IwvlcLmrJvCm70kwB  
lYrGHa94RP08/z2PW0IB/d3i0lXpXDzww8u7lUMBixXej1JPE3in/ihx00oB  
t6YLjMBMLkad6P2hE0CBgMgv5qZnufii+xfscabA4Q2mv1bkEPWZtos2DhSI  
72VUjuVyMe7awpZWbQqkJT3dfy+fi+vIVLcJFQrkGytuyC4g+N4cMGLA8HP1  
477Bw+e5+PVwbvN/yyhQn30z066li26fx8W1xCjw0EHYVfkSF73inZcMCVOg  
f9Zx8a9iLkYvbBRaOocwdjWrqauUi4aBJC3Dvwi//IZjS8q4KHGktufVPwSx  
ZdqG8VeJ87JkgwRRCsjdPf5l2zUu/tGo4xYvp8DGiNaSLdeJejijt6lTmQKG  
66UCFt7g4hqdqVjRIwpY9fitf1F9JuBfxIq7hTwoF/uqa4m6vm4w5DnfxQI  
Njxmc2oIvD+enGTnUyBilGITXMTfxsKziVsfUwBf7SneU0/gRflNN1tKBckn  
KQv3CLgokiCgWHhSYfD+1b1BjcR7zBDePa+EqI/aj62B97jItXnNXidqATHX  
fmwMbCbe594jEVbhFmBbtCo5oIWLuxr7apaNWoDsWbMPu9u4WKGktURtvyW8  
Z++23d3ORRdPlpTeX0uoSqCX+HcQ/W3zstjuPCtIOFoq5t/JxfNhzz6Xb7UG  
lwOPQnZ1Ef4mfsqELrUBxd2TbX5PiXqKTM8pHbCBcU8ZNb8egs+RD78nBbZQ  
Z2+SsrOX6Geiz4LCrtiBt/4pO99+Yh7E5EYPXHAAVbWLpT6vuBjzO39g8Koj  
/FB4sMhnkOhPq7suhd/dCvyFy9u3v+WivL1o2HURF+joL7DfNsbFfbsWLSyJ  
d4Psx82XvcaJ/J22hbhquMO+5g+LvT4T/Wt4ccTQK3cQLdd+6DFFfNdsNxE4  
eoL5qUYHt99c3B9UV/N6rzdIRA2Xuc5ykXbD9riC6XZ4FSom7jrHReZciq+f  
1A6I9nDpcBbhYWaVs+HMUx+wtovUcJ7Pw3U397K8a31BBRjYTqI8jBvYUd9+  
aScM69aPbxXj4a+fU5FuWX5QuXHIcetiHtI2jcUbsXZB/Jr5Vx3Fefhn7GD3  
sIY/OC/ftNRRgof/CR/jyUX6g6Ko40GHZTw8YS7aGZbhD+O/Dz2yX8HDLWy6  
7zmGP9R+Sde0l+Zh3dPgZQEW/pAyflttJ8vDli96MQOMXeDd93LCVo6HkWlp



v7lSfqDa+W+rrTwPk5cu0Z2J8YXv99aX26zhoYxbovN09w5oumUjYaPIQ9FE  
+W22WtuBf2V/mLUSD4WdfzmWnd0G/oVpnVbreMgMsjV4tcELtM7c0LJS4SEn  
XF6660HzDKfcyxVefjgie3t8Ifu0H7yz2eLTTxMjBURtX/oBmcj1zpbqPPQ  
OkQ5nDrsCiH7LK5RNXi4e9z05GU5VzD02ytJ1eLhx10fap+GusB899RDFG0e  
hujGeK6sdYanNtceoy4P70S7LTr51gkKyN1bUJ+HVDGzw9P6TnBI52eauSER  
/8+nQey8rQCqq7+CMQ87Jhbk5EpvBfHV5i5A4qHx6db2WL4jCD1KerqazMMb  
mZOl/nK08C2uy+OXGQ9tXwwfdsp0gP63u7dXUXio8OKwduRxe3iUcflkz4KH  
R4d6hEy+2kGj9bedh6x4ONTVLb4jxA6KL9MC1014eHbfxecVAbaQ7ftoeKED  
wdeK6DMjwzbAkZDd+96Rh/zzi9zoUBs41ej38Z4TD61WT7YEF7OGylji/QUu  
PNzDO+m5N94aQIS+Tpxw42GBweN7TGlr80k1Dvfx4KHYz1frN1dYgVPyqSlj  
Lx7uelYSbetuBVRSe6SsNw9junTvviXer+H4ip/ftvOQ9SHm769rlqCW73Ps  
iQ8PaxVOaXL2Wclal6I/5Tt5+PyQles5dUtYJjxgrWLh62DrSGa3yxgXpWB  
UOhuHr4tUFcuu2sB03viEmwCeeiT12PNT7eAsZWt8zfs4WHF8ZRHfSEWMPBA  
MklkLw8lyHY3T1EsoOu496KhEB76DUrNpShYQLNmYWpDKFEvAR+Lp2apcOv1  
x6U5B3h4r+1BZd1rKlzm6XKjw3g4suy4vv7VMi30L7CK5zg+1R6bfg1KvB+  
NGXoRRD53JXnXs6lAq1YfOXySB6KJ3vt08CmQvR2z7Of/yPq3WRzit0pKhxY  
kr+64yhRD6QTus+OEv04YSSv9BgP/01ol5wPp4LboS1KScd5mHFbXdOKmKfW  
ytHng07wcFbIeb7LXiqYdDeqUE/yMGpTQrhXEBU06IuK157ioUlGSdWn3VRQ  
MnJT+5tAvPeSS1IXdlFB6mN2WT+NhwkP/LskiXksmvNOs4ZBvF+fOs3726nw  
21Gj4nQyD4vvZYd5Ef17Yi5S9wiThxD47pmXMxWGKhqqXFgEf4XHLm23oUJP  
gKiRFoeHaW8o66fIVGiVdr69hEvglasUdmMLFWpbMk0/8oh6nfmlobOWSuih  
oYaWdB66ZFaazy2mQqG6Ghad5qHaA63F5VMUyHh1+N6pTB6KTLk97n5G6DNO  
reWuszycHzXvqUgVBY7jvFZyDg9Tb6t4drIoEDblyCefx807Sjk5D3YR87so

4+HPfB42STp8SNKggKfXwNZnBYS/T3JxuVMItmKqXZXneZgv+/Fc9nUEcm2Y  
G7eIeO+aPav+7kPYcuBWz8FLxPn9nBNOigiyXbZ9my7zUDlGbx/rB8CiBJ6P  
6BUebnvFdbGxApjV6x94d5WHi+R/aa5nmcG7zP1v86/z8N1ZD0f50VPo1wsV  
O3KDh+gjE/pjwxS6Hodo2dwk+G+Z7FN0I0H9wuCYLzU8zKPUf8qOM4bKC0EF  
TbU83L7Jfjc33QhKzQNbMut5eMw/1z/4lCGcOeq/AhuJ+I/45/h56wNLapex  
9D2C//VzsXd09SDx2k6/D0083PiY77pTWBfCR3dc5rYS74+lYBvzXQvst3lS  
33Ty00tSIVXm0nrAb+4hN7ulfizlmFOQpgRGaW6clKc89DYzNKqulQeVVud+  
nV4e7s1Z1DXEWgzygU5Coi+IfLAh5NalX2bL/jmq9vfxUMj/Tu8ng4QG0RwH  
x/KXPNSO9gy7smKm4a+hfUTCAA/jT165s/uvqOD7U9ssr9cE/+k3U/sPLBOM  
hdkI1N8Q/e4DKaS3WVowtNh6eO4tYXcfLjFygl6L1ku7h7modKI5/O/yasF  
HVQL7eIRHn6o/P2HPqQgaBqkeB3/QPSbjsD/zkavFdTGYKzzGA+H/R2tj6xX  
ElTImp9fP07cT3e5z1ZSElyqNGv70cHDr6m0mhHftYI8J/Lnh1+I+BLtd02n  
KQgyxkjSBZM8nMn/3TrzWF7AZjiQIr/xMDoi1zR3xUpB/Dpjf9sfRL/jGM1L  
27pCcFRgyFjzk4fcecWP58bFBGE7DK58neGhf/zrB2Hi0w1B03pPm38TeP3L  
yw+7NWy2g687kzVL9KNzks0DTQvBVUtH8eAcEU/Tmi0mlbjg277FkiLEx6cj  
C0wk5ZUBgrVCZUQI+8R77ZnijaAvosn9OI+PUuzL04TeaYF6/ubqhgV87D7y  
wXZTiB6s7N0kEryIjzraqxwM95NBImLjJtISPq533yXzuAhhvoSsqk8RSPo5v  
jW2Z95F476UqkW8l+HivXme24ZMlflVan129jI87L4xYYZY1jLxRbmSu4ON/  
C0T0HvXZwMAJpRE/aT4uGB1zK86xhZ5Va8X1ZPn4zF7MYPkDW2i/qaC7UI6P  
XonSfzwjbaHRdY33y1VEPG5vDUUmbeDWhHzctdV8TNYPVnJ1toHylFVFiQp8  
3FT3oehSrjUUbZBr37aW8H+08nrwiBVk35X9ulmZj+SZJfo/TKyAt1NGVmg9  
H4Ufm62qLrKE5F9S5B4VPn4yPbxklZolxJ1eEVCiykeJptbJ29UWoP/fr62i  
TXx0mPhosc+WmAcejX/OqfPxQOf30R/jVCjQz2zL0eCj6mFdk6WIVPCUDjud

qcVH4/aNC3YS/Xnxd8uAdG0+Xhjo52yIoUJj9+otabp8fjWq+PQEjQpRN6b+  
MPX5uOhjU8v+DKL/pj9oYxykX+RxC/RIW3EQWnE4z52H9YfvN/1VTIdDsa  
EEfio+UcdFrfpYKjrtOWGDIfrf6Upcg3UUFkxYbZ/4DIVz8iglZHhZrJP22H  
kcBLx+nE4euEPnv9PRBKuH/sZCXx0UqqFwvDdhnyccdEsxZjUxCT3Hjt+yx  
5uOHiY/hfxhU4IRvm/W35aNbMnKNO5FUsHTReuBrT+SXptl0zJ/gf8uCM960  
fjxxWV6oZk+FCslXAR5OBF4rtlf56lIh+EvlFhcXPo6dV/Nat4YKqx+nzDq4  
8VEjI7RzaiEVusr9H9h48FF0ZLVC5w8KMDhGZyy8+Hgoy4xa9Z4C5DCJQHNv  
Ph4ue2x28TkFpra+32K6g+Bn7VPJwocUKNGsnzX05aPFN8ua4rsU2Lk0/YGu  
Hx+fSMk7XL5NgRUT+85o+fOREA00/ZUUAoVAPUAPI7qrr94woF4q6s1FYN  
4uM590TebDGh91ifZ5WDCb70uvV8vkCBsf33HyiE8LHy/LqEjgIKnHPIpBmQ  
lI8dYd+yTxN6xmPzkUCZA3yc/NusaJ9HgcVL7LWXh/GRJrsAx3Ip0Dim9Fc8  
nMBD/TUjvge1f7zgVgEH633KTR8I+5rXO48Mz+SeI8NRRc2FVLgTcrFQKEo  
PjpK7vjzh/j/mX2x2rNH+ci1W0d3JOjztHP/+MYH+M83wr/ukyBGjHhzC8n  
+NiSPPB8iMgv7MPzwE8nCT4T31b2VRP6vq1ce/QUUV/TEbTSWgq8KKb/fZtl  
4Nl+ZOkWAQU4Sb7tg3Q+6o49kLAj8LPcq5fZn8TH97DDrreJAr+tFwf1pvBR  
rXJR3M37FKhQfaP9NJWP2ZoNB++3UGCPaM3fR2w+9mZv7xsmbPkRTvuDND7G  
vGs6NUWc77q/J/M+j4/rJoc2PiL8MS6Sg+6m83H/1dMs90aCX7qUTsNpPk4J  
t4YH1RH8Bo39rcnko8eL7acHiXldbHm3veosH/Xk9eoKCL58VbIyK3L4qH7d  
6ELKeYlf+YeCruTx8RHDUSL6DMHvOyudknN8bKR5NdgnE/w2rZm7UMjHggzS  
4SFCr+tf+NZ+7gIfxQoGxlbuocDhHpbMnIt8PM9V+fSY00vNa1sY/xXz0eZm  
jchpE0KP19/9z7mUj/NbH6EQoX+PbW8IUisj+h/ZRT200Mse0zXu864SfDNO  
JquMIWilV1EHyol++Gtp2buHClu0K3RuVfAxZPzqm7IyBMG+Ysn9VQRfxZ8e  
yO1ByBK9MGdZzUe7NZ/l8wHhyIX8CcUa4v7eh4IJGYRNA6cfPq3jo9Ct08d3

HDeHeTG82isNxP/9fob/WW0Og7LsUsYdPi4LOppy4xZAugstidTEx2CDd4Wf  
XptB2MTJKOn7fPzsnTWkccAMbJnH93xu4aNsyqbGhd/IMNcUYXG+nY+KDQde  
i381hRf+YbqxHYS9amznb5TuPF3n7JXJ8GH9rPf/56RIMRo979FT/lYh0IL  
Ry6YALXH9/07bij/3sp7dGETUDjsPdDwjl+5jiUrmr2N4ell57rDfUQ/qty5  
4Nw3QzBThKN9Q0T/nLe6YNdzPZCrMwm+8ZaPcxHXL9DndGFqm4Ene5iPbiKr  
3J8r6kIJT0OP8oGPbS23vl5004YVC1Z/KfnCR1ONyl8+K9Vg9NPP4Og5gj8h  
vdWD25bDveRvnm5C6ajR9W5uzaLFkLvhi6WGSdp6XNv2L8dBGNx2jawbWpCO  
QodZd7Zsv9JQ/7Rn0GZpOpZvMKfvC18hOH0o65GyZDrWr1ip/ktmpeCweEf9  
n2Xp2FMIJe/evFqgat2UfU06HWX/o9ssylsn4N2+7rVyTTqmynzdQUYNgXo2  
fVxOMR1Lo9Mm5t5rCZpjtifIK6WjhOVoyr06bYGfj6bcmnXpSA59usFlREcw  
YypcrqCSjlN9dXTqV10Bf80zi7Wq6agqtPj0wed6Ao2/JX1Km9Jx3G69+cWz  
+oKWgdhD69TT0VYl7FCDvoHAX+CyQEUJHQ1nXZYzLxkIfuer5GzQSSd7oLvs  
9biBIOPkjPZG7XT87h29jbvAUKDI39GySZfI51bK080fDQRtWOCrrp+O/m0d  
B7ZdNBAEKEdObTZMx4KfxctlNhkiZoVtkzWN0zG/8tSVuEh9wZm3qxW3kNLR  
L7hxU0iynmBL05cb2uR0pMW3H764W1fQdqHJThfSsfqg6JHFc9qCAFrmas1M  
R239m1t6q7UES0H7/zOgpmPFyI5Mwy/qgJNW5kuMLNPxa0f7t4ECVYG2qlSh  
sXU6zjQ+WR3ZqixoFx01JNkS5020dVAa5ARBo7UdpvbpGD7mX6ydvEgw18oJ  
MHMk+Oy3slF2vW2WVRIwA07pKBdeprQ4bSnophhyiGURK2p2FWzfrwjB9o03  
LTzScQdVSbQgWBuENlc6W3mloxd5e2nHVgPIXsJ4b+2djib9GgUSHBLoj28/  
bruD8Hf3oqOTEMKjDs3l9r7peGJLjBLvIDHfrgoXO/ilY0d4Q9Z0vCUicZ6R  
t/qnYyv90M04kjVkh5U+dQpIR9eD3Ci1bBvQdz4R4hKUjsEblV5Nn70Fzi2u  
c67B6biwSnFkxMEOQpZtyHAPSUddKVbGrzw7EJmCufMMTcf+JOFaEmHnPum4  
43UgHaOs5g9v02kHhpUFnt5h6Xh3zyWVGgC760JHfvq/liuPh+r9wiWFFmRr

k6RFUco2lnxPZ+7M2LeshZBSkSVCRYmkRErm3jsSQkIo0R6ypIXsskQqW6VF  
iUJafvf35/m8975ne865zzOzbT8fH3x4H5YxzwS8DxhHOgfycUfDs6H6+8Yg  
bCe/YHsQH2/Jmfj9szWGNK1vBa4hjF25V4z1ygh0ZasJ90N8dGtULgmwMYJ9  
7fv8dh7h46GeWXV6Kw1B+05mYc9wpt+xN7+fSuFBmkA6eXcEH2v3NYduXc4D  
3UPvN+w9zseESPdd+cVcaNla8tjrBB87nrsXRlhzwUfvnPO+kwyETFuc039x  
YNbinSM+MXx8/+eWV3ERB9J/sU75xflx9Y2z8b0gDuh3z166/wwwfnxQkdjdv  
4sCLktfFAWf52HRm6aVgYQ74pRQbH0hgbHvXvD1NBIgePfk6KJGpV891mZUZ  
BGRudwoKlfk4fcr7h+4hAgxAbfYhmo/booZ3ajkS0K4glH44iY8/zamDWZsJ  
2P+vTTssmZm39SVGCzQJEHT79fmRFD6a/i75tjixs/M0Zwan8XHrCNXWiQQQ  
wWXgm87HHyWyzfmMHn6z2eiQZyZznq+ltTSGgCOzm4u2Z/FxXkvGv+kMf1vU  
5vTJPpuPH011z58ZJODOpYGVlrl8dHYxmGqT5cA3rQkBFPCxwCMtQyyYA/H/  
IptZ1xm8DJwQWp3JAZXaOXM23ODjnoUfT3jWceApSXGVi/koz5Pa1PudA7vc  
loUvu8XskxtsnWIZLkxXuXp3wR0G35mlcSMbuZA2pjEicY/pt9tT03uGXNhU  
Xqoi+oCPHhDbJnDgQudpw13TSpnnvz7W3e3BhWC7ptSJMj72pFlMDnhxQWqZ  
U8e3cj7eXWndXO/DhcKhfsmhSj5mbf0d2uXNBfNbvqa9j5h4pSjvVO/kwID4  
eNTLx3wsWTtvnaEjF06aRjY1P2XOQxpzFvK4oCQzZ7ymho+aTT97fqzjQvlr  
cmPVcz4+Fy+OEYhzweWqgveDej7+EtvocXeIAxMHci8XN/IxwPf5R7mHHNAQ  
K5W73MpH/dpPHU2uHGhs5VlfbGPerxZpjVXjgE9a42l+Bx9bzWcm3PnL9E+z  
/3dUNx9tZDXO/M0kgPPXh3Wkh4+NPTleexl8vH320z/oDR8bOGd4b6wJOMqP  
uOrTy0fbOKGvYusJWOw6u39XP7Mvj9Zrn5tHwN01pPz2QT6ON6i/lx11+MDo  
Ugf793xct056pfxrNoyU5ZyzGOJj/e2ZvYr1DN+KUa/hfWLwOdc4lS5ng6pt  
iRB84SNbPfn0dsMf1nKM2B9ZfC6lv5z+3WGX31oCFYb4eOSvnPHMvLZIHrz  
a+HqUT6e9Tta2MPYl472fVD4weyzZ/ZH4goZPmXso7Rgnl8RXxe+y2P4X6fU

T2eJST5+6JtQiWf8Bfcco0SmmHn0fnZ84TOGP+WKNf77zfgfr7U2a2LD9UC+  
6MRfPirGTKNWdbLhg0hO2AchEh3uKkc0vWNDdMvG22+FScy1b12d8YUNSqkP  
hjtncRg08YKzaIwN5Xu4a5pFSRSIPdFV+8XwNY2GHTWzSdwx+OJC3j82TP52  
vFg5l7H9rwmfEiaAfr74r44iUk5VocfiRKgmbhPvFiSROGzJeNucxl94PLD  
KE+K8ac0csxFggBf5WORmTlkRnp+m39/PqOvvouWJMuReN7h/rVgaQJyShPH  
EheSaPC4PTRRhtErp+TV4haTaNs+lSwnS8Asieend8iTePDj1JdZjP2MPjyo  
o0Bi9VFOszfzfKzCGra4IoltZmdlDj7zLPbUwaWk8iTTDoVxPgTV4ueeLCC  
xOsn5X/NY+Jpuq1pd34VifneHZuEmHgT/+sr3KNMYsfBE/JmTD62jxPmwFoS  
G73e7OubQYCMxeY9Mqokrvt9ebLyLxvaX3yp+riOxOiP8VT/BBuSXFUIUKtVI  
PPxtqwT7OxucBkxDBRtJzKipYL34yAZ5n8k2Xw2mXuqR3XQfG16P5qhztUic  
7LevP/6SDelhDvGLWSS6pfzqPt/IBo8ZM4e+6ZC4S061o+z//2/F3eQ+1SMx  
a97ls9MYffROyiM9dROJ9/5TaLFl+HVusuTvA/8x9fPYGlDE6BNvpXJH080k  
PmfNM5BO+L9e8b2pyCxb8jE9AMRbBhWl5cYJ0gMfN2WWOvPhgD24SeXDUk8  
O9/BztiMDRo1ykqhxIT62u1f6aHDhjHr9qPWpiR+Kdj310mJDYfcNbX/WJDo  
GD8m3jyGoP+hN6HVisRDZyYH2K8Qfvsnfl66han3uYYZh6sQIo59uexgT+LT  
hA6n5XEIhEjKv3WOJL6eGaVx0hdB+Jyp84xtJEa8SsBkS4SYtBypGy4k7lc0  
F0kRRzhXtiNSbBeJpYQP+UBqM6RNtbnWBjL1tFm9TrXPANyjTjxIDGL65RNh  
8iTZAJTmaMp5hZBYYFBkbGFrANmLE+plQ0lsb5q1bkf1JrimZ2rgH0liNj+B  
2J+rD36VEwJeFiklKwpV9D30YaNjzuiSaBjtJE8cJLXh1tbhfOfxZA4rbVi  
95FEPSg9+HCRUGkJP1OV5+Wc0oX/ODx5xUQS8zZkt1ZydOGheJ2CAknijEFB  
6RkhXdjcZbNcniZxzt+MS6xqHai48nLF4iQSax542Q3H6AA7wH31wmQSjZ3J  
4j5rHagyeL9GLoXEhGVPzxPyOsAV9VOVSWPmxSinXuATCx63jq2XSicxRrpL  
fdpDFhheCtsomUmixyPhzBKSBc+8hTTFs0hclKgbSfVngQnrtPbcbCb/hvaJ

NksW1E6X1J2dSyKZ9+xsogYLzOppfdE8Ep28jeKElrCgLmnpf7MKSXxoOfHY  
TpQFFruyNgtfj1GRjpC790ub4T+qhNANEjWOR9s5f9cGq6ki7rRipl82BY6+  
X7Wh6Ymu0d+bJPYZJo/LM+dbEstNft9m4r80NucC837LdkPzX3dJPJXi7iMp  
xgLbtfWWE/dJrDsa9a1oKQtejNlu+VlColeU0P4CXRY4VHTZjpWRGPrleJWa  
Ews64nY4fC8ncXDqavme4yzY6vhh67dKZh8My28+WcSCLiV/5+FHJPK/qGzy  
fc8C5+Ef2z8/JlEm7mup3AodeHX/iPvHpyQarl5TG7JLB7ZH9j5oYbEcE2f  
0LR8HXhtHev57jmJ4sq2g2kTOvD2vcC7r5HEk4l7TPyydGHHTQXft80kyo0+  
CnCboQd94Vf8X7eSaD5n+U3fvXowIHszqKuDxD+am96s4umDZ6/ewc6XJCqs  
V54cKdWHdwUVh9u7SdQsDIhdmtkTDHEawlvekNi6LCKg39QAvCXsI5t6Saz4  
Gfjz4isD+NzVHdXQTzLCUmnLr6D/YDhgKKb2PYll3tLvPt8H+H5JmF/1lcQ0  
Ga/5XEa/HtgXR1WMkHiLj/8jewMzvyyppejG4KnqOUIWDDz/plqQ/GSZTe  
cN/waCABU1P6OcX/SGQV1Tycz+aC8NaAkkwJcGkZL+PQGcaQ91b+bfh8Cs/M  
iTS5EmQM117Phj2lKRx0EupNGTSGlNBlltILKFwaEHgk6okJaKXWv41SoLDz  
pMdMlUgz6Fp1eKa7IoX9Jsucbn8xg4jrK1UMlCjM50QKNm4zh7rysANjqyg8  
Z2odErPOAgKNIZOalCn0lBD9vj60gIXNLaUFaynE0LJRu18W8HBbeG+MKoXj  
70rHe10twbNv7SzP9cx94u8ap1VYwtx9bSrsDRSmP7yYt1vcCopHI6yWqlPo  
faUlONzQCrYeWRc0qUGh5qNYde09VvBXuDOPtYvCyQXVPY80WEFWfFRZEYvC  
0svhoSPMuanchr54XQqP7n4g0mxkBd/SumZ56104yf1gtlekFdDKJ1UNDSj8  
mXB79EqVJRjcULdWAgqvTwTZXGTi69PtCfq7mcKdgtzXlAFxFTGXOhiUyiU  
JPv2l4MFqJlqPbzDofD0wZBTn5+awxOfpmtlMwobEo74T5w3BZ8f8cEzLCjM  
lIMonTvLFKTC9ZLFWFJo566VUBlqAq7nEvoFNhSuF3nQMhc3oxcWGogG2VG4  
bY6K3mVGH+Slv19n7UChx8dnuXftjWC8CEJEnSi0leFNhewwhDT9j8kDzhQu  
z8i4mTDGA+4jqrxio4WBrXuehyXw4KMZeyDFjUKxfAGhq82DhBefRQ/voPC9

svqij31cYG1PWm+/k8K5plpWqy5w4dUgx0bdk8JD8zMG7Ldy4bjf15B5eyhc  
F37wpaMiF9aMJ18c2kvh6oS761VHONBwzLDisTeFBTUvVp+v4UCQ6PeBDB8K  
5UXNrhnnCGDx+VSxD/mPIzouRnLgYpFJmpO+yk8uKop14jRG7szx2xYgRTS  
s8SEdu/iwFzV9INSQcz9ikLdpc4cKL5pljIcTDGD0bQqxokDWw3GK2oPUjg1  
7fQLqx0c+FudOZh9mMKQWnwZs58DWRaWs6PCKKxpmrs6N4YDpu2Tam5HKZSQ  
FbqmlMfwfdcrtpuOMfVM0nb3beMA/d760IjICl85l6r/mc0Fg/2/U0aPU5jk  
ni9tZMaFvomcysYTFBbmLJgop7lwOtL2Xf5JcV015JpffeGCxtit6+ExFEaX  
ryucZsWDV7vlDm6JpVCFkzlf5QH0S8Pbl55hsHbU1flPm1DUDN/KTleT6Gx  
g+myl6WG0PFQv6nmHIVZv8zX+FsbQYR6SILKeQpzH1oGrP1uBC1ybmsJisF3  
w9fwAncTCDtdMSIjoHB0g1vGFjVTWPI7+YP3SRQOvfQtD5ljBgd7B0zjUyhU  
ko73L/xmDvIF3j6dllylMe/HgbeEpa3isUKeVf4XJL+yLr0BqC/idX//naA6F  
4rOfc81N3wIVId/iV+RTGCc0eEe8ygY82SGFfsUUKuxW3n9RwR6ut0d+F66k  
8lps+M7uxU7gaNL/oKOKmfeze779LnOCaaXcqLxqjv+oIjvgHc5gkyEiY/2M  
wk8zHcV6cl1gStrrIVItg6/sbkG0+XbIOlmb9eM5g/8PvX7jX7fD+L547YuN  
FK5JPLCYu9wN0l8P//FtpnBYzSy3P8cNTLdYP8FWCvVXngvNlnSH0UdFZ6Xb  
KHzoVVBiyegOKSxpx3ftFD7yuGkTHOQOvKtBy+53UvhZrOtXXrI7DC9pfx/X  
xey3bQ7+R+65g+Cszg3XV4w/C9d9B+vdaadfOKT+msLw18p5a1+6w9CBXyj8  
lolXdOidYrc7JL5zFuvopfDe445XH1vcYdO2suar/RS+llQxkq1wh4HnCslH  
Bpl9OyDbuz7TheIhwsPqPYXum5o9qw65A6uoV0VpiMLfEokJ7hx3eLuCMzr2  
kcKXLmfl6enucJrOKnn6mcJyvYnTvZ5ujN6adSJ5mKk/pRT7+5orvArbY+77  
jUKyQuRGUtd2iB5+JoPfKTQrlg5s/ugCajtUeqTGKFzgVmxY1eMMHa1xVwZ/  
UKhXapV1stgJlgy/+N4bp/D7Q8fp+nu3wdr7lqy4SQqjXfgvxv84Qovqjb/b  
p5h+xDryuwMdQL9vyHfrHwrX/njE/nPjDi4nreix+UfhvumN+i/KbWCu1XZz



i+k0Kuw4PdPjzUEzRSUGM2gcUfnQmJ7iyW8KmlSIWbSqESkpu1WNgdu40xk  
AxEatf6eyWpZbAoFa7hiOmI0Wsxp6+DXG4Psm6OH10fQOBxs79ejbQzh1N33  
qvNonC+08NjxQSN4ZzbisFqCRmW10B2yj43AUkj1ieJ8GnvkWCu8HxnBnXu7  
tjdI0yj3cmaLXaMRKPinZcnK0nj7/OWwqx1GcGpVp7TkAhq3k335Dsz5t+75  
UbMX0XhP6ebk12oj2Jpo9l14CY3+XeznGneNoMI4esc/eRodOkS+6qYbwdp/  
D5smFWhU1Q7XlA81gsTbE5vHFGl8JqGw5ycYwa99GoXDSjTmjhhfzxyBA8l  
H4WhlTR2vDowKhNrCLWdV+L7V9M4VZo3IqNqCBrn3vzuWUPjiX7rnCeNPLjl  
W+TTqULj3YwaKfMwHgj/tuluWUejjskhjacbeeBTfMa0Xo1GvmqFsNMof17s  
fXL/6UYaVwstnGZcweyvZdPWVmkw9bJvrzqaylWsNr2kUi0a78SrLj3y4sK8  
MwdE7rJoFC6Qkagw5EIlcS2kSjd5/gaZVLeGC68n3g3m69M4dCHvvpqIkFwwL  
Fe2zDWgM9XIIIP3NgUJpp+p0oLFclanq0jAHFsqtMheRRrexa404wIGlvpM  
iqBxSe6db3JdHPgQIyKVwKVx19c2x7+NHLDezl6MNaTRoHbOzPHHHFhecMvt  
mCmNifol6vLFHIj1GG44bE6jZJNWkXEuB74vXANBljQun6wOOZnGgaroi/Je  
NjS2Ry802hT3/99fjr+0cWL6nWokU+DJgTrZUmMLFxpPHtdXPubCAe26H3eN  
XGn0ZJep77XlwCw9L9rAg8bPQUd1otgcyJWyt13tTePlh2Ve6ss4IFlzukrR  
h0ZrqDX5LseBw8ceqS/xY+KdIAI7xJnvyWeWpGQgjb5ppz5K/SPg0+OI9ZOH  
GbyaP0r26SXgkN4R15YwGr9EE/8NdDH691rX17yjNKoxm+P4CwIUSYGUSySN  
euni9brPCLgu8vOyVhSDjxkjNVuqCNgUZqc9L5rGQCcjC6qUAAeP+VsfxtBo  
YrfP81IRAf1t/kN0LI0eRa4P9hQQsN+kIdT/DIPH4EkZ1xwC4jbGpSom0BiW  
leDUmUrAwqwhctcnzNPbWEDNdLxCQvcC4oplP49UaEW1ZioCKv8L9xwVMfeu0  
Ly+JJ8AycGeQ8wUac2LsMnxOE9A9WDIT6yKNKx9WFX6PJmDvNkXB3FQaV3Qn  
iBUeJ+BnXfiawTQaE7bV5mQeIyAKe+6XpdNYa1UQ0HCEAMlBm8zoTCa+Fwcs  
NUMJSFNOfuWXRaPEn+2rWg4SoHpxwtcom8a2tzk9+cEE3BN3/Lcsl+kvdda1

8gABhsdvJ0xcpXG/htU5aYbvtv6QVmrOp/Ff3WrHy/sJcPcKvHn1Go1vwmxS  
A/wJGH7VxD1eSKOPvYTJMT8Cwqw3tDsV0Si0P5ld70uAaHX8Hs2bNP7t3ejn  
wti0zueJObdpLK2UuLOesVfmm8Y03KExaVXQNIKxixSuLim7x/R3xUWtZMaG  
RJFr1AMG362VejrM/XUzd4NfKTMfjqvGFzH+tx2ubjR8SOPeVCE7DhPfu89K  
05ZV0MgepHVuBRAQ5B75fbyS6Z/OstO+TH7TX7yJanpE46q8zg37mfzPGoHs  
1cc0frCdJl3G1Ee+JCU78imNomati+yZ+11Vm9JxqmHyvXJWVe8oAazMbTUa  
z5l6h/pv8I4goFr2ntOcehrXvC2eOxRFwJbTcp/7Gxg8f6by7pwiwGd/qzjV  
QuNhmw2P2QkETParp/u+oHHjSzjf6QweTjomqBu2M/O8efluiWQCMsDCbvwI  
jS65601GsgHQK84fbOymMUigKPcoj4DSVbMP5vbQ2CiUr9Z2g4D2uU8vbOul  
sdrigN/9MgJ2RaxS1eince21HNW4agJGRqNKZw/SaBvj7p7ynIC53fim5AON  
cUXmLkeYeWFffbBS4RuNmnWnm9dNMxi4JFKw/juNXlfcPv0R5sBG2k7zvzEa  
t+LxGfISHFCIGma7TNA4qyZfBFZy4JeLkIvyNAGKnTxuOd+GAwG2/u+uCglw  
Uf0NE8KV2Ucmpb73hQXoPKL8o8ybA+0shyOdogLUezOsTZ5g+KZk7AW5+QKs  
62gyulbCgbUiHYqrpQUo0K05MMXw2/Q/K3K1ZQVITHjL7ezkwNmPZXfsFgnQ  
rqh7mt8PDuyrHmlNXC5ARTIXi0UbubDy0DZxCQ0BDjwtrnybxYWLftmUgpYA  
y9MbqlRvckHKc1RejSXA/tr6fU6VXJhme69qoS9A+XuTh+17uNCjWmkcRwhQ  
LjTjnac0D+yUxJuSuQL84B5wMkCRB3ULnR3zDAX4X7+qo+F6HjyY+c0zxlSA  
Z+1qHcCQB/SbNVEitgJ8nSoRdCOYB/Pag2cvsBfgSaWlTycieHCirur8akcB  
eirzoyfjeBB43yWd5yxAp2/l+XMyeDBUeFXZfrsAS2x/PZHM54F79s/ru9yY  
flKzbt2+xQNLfkjZ1E4Brta28nvyhAePT/dw+Z4CjAlo/bKK+Z4ZRKjUZe4R  
IC+/IXtuBw9uhhy0LfYSoFCx0IGg1zxQ8a3uqtzH+LdXX+c4yIOMnfM9mn0F  
KOkpX3D9Ew8WOrkOvfUXYN6N6LqgEUa/WOfv/xYgwJciG/Zc/skDEaOJ8X8H  
BGig32WvNcWD/wHJfIZM

"}],

{RGBColor[0.880722, 0.611041, 0.142051], AbsoluteThickness[1.6], Opacity[1.],  
LineBox[CompressedData["

1:eJwVlGk81IsXxqciiShZKyNZEPEkyzDmGcZSN5KtWzNU1rJvs/wQ2WVfYiiX  
pJToUqEGublxVUrLTSVJSaVCbrK3/Of/4nzO5/vmbM85R9UzxMlnMYIEOie0  
/3vzyWf/hUmTaCSH289U37vTBnPe1Y9yBmh29/emyWVSEHdbOaKWM0ZrzOgP  
tGrYgVTvYZv/FKdp5me5nha1TngwbOqSyflBo4ZVeQtUfkfGla761f6LsaFl  
09hxijvqwsON3yguxXfjuQi1RYcw87WLEcNZAcwSbt8Nx9k7R08O5u/Evmx  
R7++3eWHcoFUtYS/DHPnJrXVzuCy0regeF0WYiFVMzG9fvjFiHY0qcoj9ah  
rWYN3ED09klN0iYUUMXN6M2fC8IHU++mqi4lii+JWf3jGQKJeSlqJecZGgZi  
pypnQ7Fuvzep314FtUW/ljdkhkFh4OWb0/nrIRWfFm2pEI71WalWLRGqcBWN  
vj1SHI5NVINzYv4b8CBUS95IjIGYy+XtriqgfTLQnA5MQJmf6QeDqarY4SU  
Xdw3FgH7Hy91ehU1oS/evv/XpUi4XUrNShPZCLN/HuQ8EWHjgLvBF70JjRgl  
nNu7xl2NwysGHL/0a0FShRc4UsFG2I3UK2e6NqGqtXb+2QgbUUEGsm5XtdEy  
ub1xgw4HicoDbPFyHRQ7c9irj3BQeNTANJSji7PxEOYLzzko0x04qeaph5bl  
Bm6YBBdVA6nfn9pvwaiZ25UsChfPbZS2dK7Th4mMs3qyLxcvy8YHy/KFPNmm  
kpHDxevpW7m8ZVshOd30saeRi3c0JXSn2K1CXV2mY/q4GP9pVSnbq4Dxs+JV  
rUo8fHVTchkcNMDzR3OKJ414mPlzXETgug0BM6WBxB4evi/taMzv3oaythpa  
tD8PpAMlvoF0Q/RqiQXfiOdB5Fqwgs01Q6i+aKOz+DyISzNuq+huh8dF2p7w  
Gh5k/hrf9K+iEcC5Z07zgAd5hY4XtdlGIPU8lA4Z5GFtSElGiogxNIDsHXaO  
87C+K9j8YJQxtukwn4p/50FdhTFmOmEMmr/Fhb+WEdDiKpWt9jVBVH55dows  
Ad0H4w5j/SYYEISQHVUIGMWV1J/uMsXD5bL5bAMClGfBh6KoFNwvOqA9RCFA  
28KQcblKQdVkwveTlgQYqUq3dDeZoW9hZUZNDgJ2g+MRYuVmmP5WbUV2JLDL  
uEP9jaw55uccqT9cCezJKeltTjeH5rnJ53uYBNw+BKecIFFRz/33svpBAvtp

DONgDhV753rJsd4E9FK1y7ZOU/GRanu34TCBxQ9Wik6xLXBJsvtVcCCBp/Iz  
AdenLPBpqvRuQwiBGo+Bx9FsGmyfd2VlhxM4VnXLIDZFW3QyO2kJm4D2jItj  
PAXIeb23aA2XgOza20u8ooD4urv6L3gEflqYXWM0A6pmxTvtogiMeP7przkP  
TJ59E+cfTeBxiip5GYUOr1/DM9YxBFovnnj0kaAjmWPIHxTy+R6x5G4BHcU7  
Bh+bHSWQ/zXK5NIcHR57vox5CDlGfvxztqklBheNduwSsi/IUHkoYYknGX6S  
4kJ29Hji5CSwxJe5k2S+MB4lwXap4Zwl3np7GMwL86tXNQvkTK2glpdgsF3I  
Und1g2Z4VnhUc/DDTmG9c2On1/ddt8Lbqfl+KkFgeJXsk+ZZK3jcUeetFPbX  
sz01tdSEgZq6qckODoEzR4PGD1xnoP7U4ab+CAKZFa8r6LMMrGRGXqcL58fp  
dHZVM7HGotMH1uSFEvhtBaX1/TVrHPybQ/4qnP+30qXpQddsEKj6s3ZlqNer  
mwR194wNLnibTgk8CdweHp3QN7bFp97i5CShvn9s/nfvtyZb7GCYzE4L9bdp  
LdelbrKDjeLVaF8nAsX9Ju1pjTshccLa8BuVgNmagNnKqw5QXpRw30mGQMqQ  
e2LHFwdY+YgGXpcW7lfNsZEv2rtBMi1RVV5BwMO86LnZmd2wlvNUGRYjQK87  
+PKInSOky1+Z+f/gwftRRusi4z2o2vZPgeciDxflhmK2yjjf3hbos2HozK  
sn/k9rhB2k3iiZ/wXlNacp6+UvaAR2yq/pl7XHz6tHvZsKgXbAMu364gczFP  
fzy+TuCLHNLli9FEDtIVXiZXtvhDdHJG5clrNrZPCtLCaoKxevMFdwNrNnwK  
j39q1wldZPiS8dFrkQh9NTsStikC3RHa+q83RCKkV0OSIcpGkmqDbuKpCMQ8  
MH8neCb8a+pvHa3WROBOGr/o6SMezL8V3L+TF47lfnWBchejoNEzuXRILhwZ  
IhJrF6pjsH7fsuUmBWFYc84xLul0LHQ8OjemyYfBoXGTSDHIGOazO+Xcz4Wi  
buaeYbtJPDoJt9wx3Vck3+vhLmgkINH/Zv1/CSEQjf+qKb4xEeHZi87sLguG  
mLHE5cNqSQgYC2BqdAQhMS7Bvk8qGQqFMc8Vfwai/PxaN2WpFATJ7mjU0w3E  
ds/VYeHfU/ByOpIcGhIAJzLJT+l9KiZ+EyMxmv0h3Sx1p+BtGt6d/BxCWjgC  
m5FoqsrD45gK6Nbba38EytPLybEP0+Gjue8PatFhRlvm9Ondy4DUlq7ppA9+  
cD4fdn6iKROpofbeY3Z+6NbivEluzEJ/XL5vYYUv2sz7dDdXZsPX7/jnUnFf

GDttdVXPzMF5r1HHeJ4PLIS6fuMycjExOpHCGPRG+Ae6rW9zLrYK5n/TdPGG  
5FqaowULD+t4l1SD2r3wlh8wVHY5Dxd9q420zL0QWyjjeUEzH9s67yyMtHri  
Y8Jd/qlz+RCsiW0tMfJEnuCym8K6AnQ9Xqg523oI4q+ru2NKCxB0edola35I  
+D/X6WWsOQG1joYAv/aDaOW2KW3IPYHeNI09CaeDEPk9rOWMdCFK+4KbyIID  
OB7v/L4mpRC7JHYuXH/rgcc69T/dFwqhMZD1ZVrBA587le/PEUU4UiH49ATu  
oFc3q5MnikCbruyPP8rC9XKxWt2vRXDeX+iuEcWCfpHLNuq3IvQES1rf4bBA  
Thyns2aLYBTEZMiEsjDP2nDgJlkPqrLOkmpPFq6sTC+RX8VHeoEI96MtC+q8  
fVLSBnzY1g0ON8qwcCq4qpBsyEcvy4/kK82CjM/k0j0jPpa/momTl2SB5jSl  
Y0/ho+HmKhqeKAsDOu12GZZ8f04m6uizTBQNaiWKOfor6Ub4vR9gYsVT9nIF  
Vz7utvy4UfqCiar7f+dp7uXjlk4P1/kZE+EC1mlrJh+kLnW5vx8y4VCQeyPR  
i49DWt5TlbeY6Dw+wCjw4UNfVcTH/SYT5se0753x42N8f4Gxwg0mtIM6XrQH  
8OG6eY9oZhMTFV6rPB8F8ZGRd5hke5UJxf0eH1+H8NH9GB6L65nldawJnQjj  
o9+th9xWy4SY7ezMrwg+kpJELaOqmfgf7Pqr0A==

"}],

{RGBColor[0.560181, 0.691569, 0.194885], AbsoluteThickness[1.6], Opacity[1.],  
LineBox[CompressedData["

1:eJwV0/k/1IkDx3HbmihFVEwYVI7wpVCswrynprKtkcadc0WkxCiDZd3MMMxn  
Gscn1U5KSLop7YwuHTvV0uUrjVwVotTk6Ctj2v3+8Ho8/4LX4oh4dtQMFRWV  
vf/2f13GOkY4Wir0rBKn/LhVDHovMXD2PbebXrbU5IPpESNk3qXtOcn9QD/C  
Pj49KrUBL7J]/wwh1nD4kCRGk1qzCw35nn2LuNzq/LjP5gLoLBOfIZ+fHzkDe  
lz9qwmYycCYx0ekFdSZMJlRpkefr8HlUzkznzkXf+gCNqjk/oyRQOnBMPA+O  
P0Wote36BYelmvUasTrl/cq2u3yChVup0uUKqi7chjZpz+33QrtCc4w+rAfh  
uvuXmtu34LVzZG0tfBHyftTQd50xoTGp6bqXS4NS8cy8LdQHhlsjVZ6zjPFD

HU0t3sQXet1dL6rEjrjzNtFf0eELS1f7GrXYJbBqbrpYZeUP+w9dM5t8l0LC  
WDFgIffHmj94MbsZpsh8W2vTFhQA1rcu63aqOfjPFtrz4wPhd4pXwle1wGLD  
5UkpHwMRFmL/cc2wBRhqwtSAHVvBuco7f1RuCUuzysadHkH4Lc5+gd8FK9g8  
DNq7uTElubTupFmHrZHwYqSvwCAY5b/bOydwVC/yz2JqgiGxKb7wNIIW9Tp  
NPZO2oWgtps39ZS1HG2TLtNreSHokih7JeIVW0De6j1oEYq+8VuiFHU7MESj  
1IY9oRjwrGSwM+yQsP9cU92VUCin11VTYu3hUGY298uGMlz6Lflp7bUHJaV7  
UMIPw+fTSlWprwMGKxJHje6GQSWscvsuxkqYZTXZHjQJh851pWUub1RFpVkfG  
solw6Ord7jwpdMS8247ZMfxhMIivFBSooH6Pnxtw81wmBozPzgPO+FG8sTm  
uLFwOGZWnq2SO6M5itbz3PNXbKUznXZzXXFX0xg5Y7/ClmclsRt3RYItU7hD  
PQIzHs6j/C/JDQtMTqvPoUWglbT7SVoSHdvMNwWUrY/AtNuay0wZ8M0g/5px  
WQS8Qv/LZkvX4pO6NETuuQ2fDs0siru8AXJ+8Dd/ZiTW60+cqL7gCZrNeuQ  
801wlAi/iR74IUZoSA93iEVBE/G0hxaKfhqVVa6lw7t3m9X7KdtwIqNMu1OR  
gEnGE6WhdDveX0k/VVKZiCK9rvzqplhoV2y8zufsxaoxKZ/TsBs/n7p96a0D  
F1FzCt81W3OQ1Lqku6klGQk9E284lnuw0Hmkcl56KuLbzeYwKUKIZ0ZP3fsx  
DekPXQakHVy8jH+v/iQ1Hff4ZMXTxykln09/5aZqBmZHn9m18MRv0E2Puey9  
MxMVCVQ2Dr/Xp2PKor1OamAX9Gq/MvKoMbGrNf7XUIhuelyxV96/OwkhQms2r  
+9k487llZfNP2YgU2/xwMTkHRS0Pkr+a5WD6eqn8yIjcULJHzWdZ5GLJh60x  
s2W5UHPSOBezNA8ijtCjzz8PuZk5LIVmPi5PGWQte52Hw3UGfjTNAndbxEas  
jHysipjPSZwqAlt10r1UrQBsi5XoRYM8SAXnH9cUFUBLpnmv9BUfU27ySMpC  
Hja8SXM1flQIzWduLcfFPNDGZxtlPCpCaPWwt4keH2kUQmHbIsCpGOMF/Hi+  
vOs4dcONxdgxXStmqhfi72XcF/mXSpD82mPYN7sQ11wUNv+pFiLpYKWu+8dC  
OLHtfE2LCXzZTNqtCyc8Wrft8lMERI8/SeM5UVIfM3YuF0mgvIuT3bHWOA5  
BnQvt9X7UCxiqb8vF+AVuf0I5Nw+nDI4vuNC5BRrhNx3FwMM9n8k1HsYrzN

uU8erBFjfqyoU3ShGPuk5/z0DEuhRdHyaNEoway++r/TD5Ui4dKL7w9iSsDk  
GdoK9MvQIN7yF9FcgivJ1xYtEZXh2LOiUhMdiVQDOE1HtcrxEIWpxtFCFGZ7  
DzYUICPWdfsbr4tCPLE+Ox3ytRwXMsfOUaaFGLpDa/2SWoFbjQc7On4hwKiX  
mRoNV8C7sqA2U0zgz8NqJ21GK+C+9/ehxIICKyp8HFw/VcDjk0xDWUbAKFfj  
CJ6oANXPoCeIJDZvCTsgAoJ/VtD91cdInB+XlGlrjaJKIdDd1/WEDBNCdTU  
sifhmWyVuFhK4ODu2nKjlsQKfb2X+cgI6ESNGdo6klgu8ZD9+xJU2CXWrNUk  
FtY1c4auEui2bnYXrCVxZ7Ht8gs3CVT0LstV8yYxzm97vaaFwNynSbP1fEms  
CJwZsquVQF7LzX3m/iQ0e1inDz0gkCgNrlfROJ7q/XA1CMCnqWiq7nbSjy5  
sf9YUzuBO4XdzNIoEpSzg5PvnhJwybJqORpNguiPtdF/RsAq7nZn804SxQPm  
FimdBI5s0454HEdisW60svY5AerW0Ld98SRW+ij3tXcREHk1JAxzSHQ8vqGt  
2kNAbePE5+97SBg0v4yz7yXwDwgJVEg=

"}]]}}},

AspectRatio->0.6180339887498948,

Axes->{True, True},

AxesLabel->{None, None},

AxesOrigin->{0, 0},

DisplayFunction->Identity,

Frame->{{False, False}, {False, False}},

FrameLabel->{{None, None}, {None, None}},

FrameTicks->{{Automatic, Automatic}, {Automatic, Automatic}},

GridLines->{None, None},

GridLinesStyle->Directive[GrayLevel[0.5, 0.4]],

Method->{}

PlotRange->{{0, 1650.0258}, {0, 1142.852117}},

PlotRangeClipping->True,

PlotRangePadding->{{Scaled[0.02], Scaled[0.02]}, {Scaled[0.02], Scaled[0.05]}},

Ticks->{Automatic, Automatic}] \) \!\(\\*

GraphicsBox[{{},

{RGBColor[0.368417, 0.506779, 0.709798], PointSize[0.6], AbsoluteThickness[1.6],  
EdgeForm[{GrayLevel[0], Opacity[0.3]}],

{RGBColor[0.368417, 0.506779, 0.709798], PointSize[0.6], AbsoluteThickness[1.6],  
EdgeForm[{GrayLevel[0], Opacity[0.3]}], PointBox[NCache[{Scaled[{Rational[1, 2],  
Rational[1, 2]}]}, {Scaled[{0.5, 0.5}]}]}]}],

AspectRatio->Full,

BaselinePosition->(Scaled[0.1] -> Baseline),

ImagePadding->Automatic,

ImageSize->{10, 10},

PlotRangePadding->None] \) blood

\!\(\\*

GraphicsBox[{{},

{RGBColor[0.880722, 0.611041, 0.142051], PointSize[0.6], AbsoluteThickness[1.6],  
EdgeForm[{GrayLevel[0], Opacity[0.3]}],

{RGBColor[0.880722, 0.611041, 0.142051], PointSize[0.6], AbsoluteThickness[1.6],  
EdgeForm[{GrayLevel[0], Opacity[0.3]}], PointBox[NCache[{Scaled[{Rational[1, 2],  
Rational[1, 2]}]}, {Scaled[{0.5, 0.5}]}]}]}],

AspectRatio->Full,

BaselinePosition->(Scaled[0.1] -> Baseline),

ImagePadding->Automatic,

ImageSize->{10, 10},



PlotRangePadding->None)\)      liver

\!\(\\*

GraphicsBox[{{,

{RGBColor[0.560181, 0.691569, 0.194885], PointSize[0.6], AbsoluteThickness[1.6],  
EdgeForm[{GrayLevel[0], Opacity[0.3]}]},

{RGBColor[0.560181, 0.691569, 0.194885], PointSize[0.6], AbsoluteThickness[1.6],  
EdgeForm[{GrayLevel[0], Opacity[0.3]}], PointBox[NCache[{Scaled[{Rational[1, 2],  
Rational[1, 2]}]}, {Scaled[{0.5, 0.5}]}]}]}],

AspectRatio->Full,

BaselinePosition->(Scaled[0.1] -> Baseline),

ImagePadding->Automatic,

ImageSize->{10, 10},

PlotRangePadding->None)\)      gi

(\*-----  
-----  
-----next mouse\*)

vn=readTac["C:\\Users\\exx\\Downloads\\TbAM4, Liver 2.4815, GI 0.77375, ID  
4033.csv"];

Lv=2.4815;

Gv=0.77375;

id=4033;

vn[[1]][[1]]

{{10,177.857},{30,486.214},{50,265.856},{70,222.147},{90,196.842},{110,183.809},  
{130,169.619},{150,159.766},{170,152.204},{190,142.529},{210,135.816},{230,132.  
202},{250,125.917},{270,123.433},{290,110.302},{330,99.2974},{390,86.0351},{45  
0,74.3576},{510,66.2488},{570,58.6817},{750,45.431},{1050,32.441},{1350,24.836  
2},{1650.03,19.8961}}

model= mouseModel[Lv,Gv,id,26]

ParametricFunction[!\(\^\*

GraphicsBox[RasterBox[{{179, 179, 179, 179, 179, 179, 179, 179, 179, 179, 179,  
179}, {179, 180, 180, 180, 179, 179, 179, 179, 179, 179, 179}, {179, 179, 180,  
179, 179, 248, 248, 178, 179, 179, 179, 179}, {179, 179, 180, 179, 179, 253, 248,  
179, 179, 179, 179, 179}, {179, 179, 179, 179, 179, 248, 248, 179, 179, 179, 179,  
179}, {179, 179, 248, 248, 248, 248, 248, 248, 248, 179, 179}, {179, 179, 248,  
248, 248, 248, 248, 248, 248, 179, 179}, {179, 179, 179, 179, 179, 248, 248,  
179, 179, 179, 179, 179}, {179, 180, 179, 179, 179, 252, 248, 179, 178, 179, 180,  
179}, {179, 180, 180, 179, 179, 248, 248, 179, 180, 180, 180, 179}, {179, 179, 179,  
179, 179, 179, 179, 179, 179, 179, 179}, {179, 179, 179, 179, 179, 179, 179,  
179, 179, 179, 179, 179}}, {{0, 0}, {12, 12}}, {0, 255},

ColorFunction->GrayLevel],

BaselinePosition->Bottom,

ImageSize->{12, 12},

PlotRange->{{0, 12}, {0, 12}}] \) \(\^\*

GraphicsBox[{{}, {}],

{GrayLevel[0.55], AbsoluteThickness[1.5], Opacity[1.],  
LineBox[{{9.0909090909090909\*^-8, 9.090909090884856\*^-8},  
{0.0874367476365131, 0.08197166587636243}, {0.18222810297558026`,  
0.1358255024317191}, {0.27073779576926765`, 0.13315455086535802`},  
{0.3575112797365835, 0.08143316377978886}, {0.4516394623155443, -  
0.007347854733426912}, {0.5394859823491253, -0.08816932746972758},  
{0.6346872009943513, -0.13787329990112937`}, {0.7281522108132057, -  
0.12816574147938434`}, {0.8153355580866803, -0.07001063326902106},  
{0.9098736039718, 0.02121659675083076}, {0.9999999090909091,  
0.10024804094746914`}}}],

{GrayLevel[0.55], AbsoluteThickness[1.5], Opacity[1.],  
LineBox[{{9.09090909090909\*^-8, 9.090909090880112\*^-8},  
{0.0874367476365131, 0.08090369567458766}, {0.18222810297558026`,  
0.12746559200130417`}, {0.27073779576926765`, 0.1116266937044405},  
{0.3575112797365835, 0.046963725126600256`}, {0.4516394623155443, -  
0.04509050859182233}, {0.5394859823491253, -0.11115559892361665`},  
{0.6346872009943513, -0.12642564594664163`}, {0.7281522108132057, -  
0.07740196037964171}, {0.8153355580866803, 0.004179083230780074},  
{0.9098736039718, 0.08937493944143977}, {0.9999999090909091,  
0.12834702174618903`}}}],

{GrayLevel[0.55], AbsoluteThickness[1.5], Opacity[1.],  
LineBox[{{9.09090909090909\*^-8, 9.090909090875369\*^-8},  
{0.0874367476365131, 0.07984396759533968}, {0.18222810297558026`,  
0.11939549826670079`}, {0.27073779576926765`, 0.09184904274707059},  
{0.3575112797365835, 0.017913117173780694`}, {0.4516394623155443, -  
0.07109962300031061}, {0.5394859823491253, -0.11717052830989395`},  
{0.6346872009943513, -0.09879571259704382}, {0.7281522108132057, -  
0.022693471356141894`}, {0.8153355580866803, 0.06128703302641453},  
{0.9098736039718, 0.11605625481609519`}, {0.9999999090909091,  
0.10415981267620744`}}}],

{GrayLevel[0.55], AbsoluteThickness[1.5], Opacity[1.],  
LineBox[{{9.09090909090909\*^-8, 9.090909090870287\*^-8},  
{0.0874367476365131, 0.07879243663407876}, {0.18222810297558026`,  
0.1116081822210312}, {0.27073779576926765`, 0.07372482040530459},  
{0.3575112797365835, -0.006267252216927747}, {0.4516394623155443, -  
0.08743897872291118}, {0.5394859823491253, -0.11109134853087661`},  
{0.6346872009943513, -0.06371549528296311}, {0.7281522108132057,  
0.02544576624054603}, {0.8153355580866803, 0.09464282937855747},  
{0.9098736039718, 0.10731931496853601`}, {0.9999999090909091,  
0.0516787429232188}}}],

{GrayLevel[0.55], AbsoluteThickness[1.5], Opacity[1.],  
LineBox[{{9.09090909090909\*^-8, 9.090909090865543\*^-8},  
{0.0874367476365131, 0.07774905743802465}, {0.18222810297558026`,  
0.10409673959866513`}, {0.27073779576926765`, 0.05716133039337165},  
{0.3575112797365835, -0.026084496726167965`}, {0.4516394623155443, -  
0.09591154799603378}, {0.5394859823491253, -0.09685594593277226},  
{0.6346872009943513, -0.02730376120671303}, {0.7281522108132057,  
0.061646715198529656`}, {0.8153355580866803, 0.1046634148537508},  
{0.9098736039718, 0.07509702498429204}, {0.9999999090909091, -  
0.006536873471333553}}}],

{GrayLevel[0.55], AbsoluteThickness[1.5], Opacity[1.],  
LineBox[{{9.09090909090909\*^-8, 9.0909090908608\*^-8},

{0.0874367476365131, 0.07671378556951527}, {0.18222810297558026`,  
0.09685439581479163}, {0.27073779576926765`, 0.042069810325321415`},  
{0.3575112797365835, -0.042006785469922474`}, {0.4516394623155443, -  
0.09808544986431629}, {0.5394859823491253, -0.07760167026270944},  
{0.6346872009943513, 0.0063643674428021085`}, {0.7281522108132057,  
0.08405712128907425}, {0.8153355580866803, 0.09555213349985489},  
{0.9098736039718, 0.03202960165577907}, {0.9999999090909091, -  
0.054402034659985464`}}}],

AspectRatio->1,

Axes->{False, False},

AxesLabel->{None, None},

AxesOrigin->{0, 0},

Background->GrayLevel[0.93],

BaseStyle->{FontFamily -> "Arial"},

DisplayFunction->Identity,

Frame->{{True, True}, {True, True}},

FrameLabel->{{None, None}, {None, None}},

FrameStyle->Directive[Thickness[Tiny], GrayLevel[0.7]],

FrameTicks->{{None, None}, {None, None}},

GridLines->{None, None},

GridLinesStyle->Directive[GrayLevel[0.5, 0.4]],

ImageSize->{Automatic, 28.4375},

LabelStyle->{FontFamily -> "Arial"},

Method->{"ScalingFunctions" -> None},

PlotRange->{All, All},

PlotRangeClipping->True,

PlotRangePadding->{Automatic, Automatic},

Ticks->{Automatic, Automatic}] \) Expression: {Bl,Li,G}

Parameters: {k1,k2,k3,k4,k5,k6}

]

```
Manipulate[Show[ListPlot[vn[[1]],PlotRange->Full,PlotLegends->{"blood","liver","gi"}],Plot[Through[model[k1,k2,k3,k4,k5,k6][t]],{t,0,1500},PlotRange->Full,PlotLegends->{"Blood","Liver","Gi"}]],{k1,0.001,0.2},{k2,0.0001,0.1},{k3,1.*^-6,0.01},{k4,0.001,0.2},{k5,0.0001,0.01},{k6,0.0001,0.01}]
```

```
Manipulate[Show[ListPlot[vn[[1]], PlotRange -> Full, PlotLegends -> {"blood", "liver", "gi"}, Plot[Through[model[k1, k2, k3, k4, k5, k6][t]], {t, 0, 1500}, PlotRange -> Full, PlotLegends -> {"Blood", "Liver", "Gi"}]], {{k1, 0.0032}, 0.001, 0.2}, {k2, 0.0001, 0.1}, {{k3, 0.0007900000000000001}, 1.*^-6, 0.01}, {k4, 0.001, 0.2}, {{k5, 0.00783}, 0.0001, 0.01}, {k6, 0.0001, 0.01}]
```

```
Clear[newmodel]
```

```
newmodel[k1_,k2_,k3_,k4_,k5_,k6_][i_,t_]:=Through[model[k1,k2,k3,k4,k5,k6][t],List][[i]]/;And@@NumericQ/@{k1,k2,k3,k4,k5,k6,i,t};
```

```
fit2=NonlinearModelFit[vn[[2]],{newmodel[k1,k2,k3,k4,k5,k6][i,t],{k1>=0},{k2>0},{k3>=0},{k4>=0},{k5>=0},{k6>=0}},{k1,0.003},{k2,0.0001},{k3,0.0008},{k4,0.001},{k5,0.008},{k6,0.0001}},{i,t}]
```

NonlinearModelFit::eit: The algorithm does not converge to the tolerance of  $4.806217383937354 \times 10^{-6}$  in 500 iterations. The best estimated solution, with feasibility residual, KKT residual, or complementary residual of  $\{2.0711 \times 10^{-11}, 5.26296 \times 10^{-6}, 5.90054 \times 10^{-12}\}$ , is returned. >>

```
FittedModel[newmodel[0.0358445,5.86338*10^-13,<<22>>,<<22>>,0.139783,5.86338*10^-13][i,t]]
```

```
{fit2["AdjustedRSquared"],fit2["AIC"]}
```

FittedModel::constr: The property values {AIC} assume an unconstrained model. The results for these properties may not be valid, particularly if the fitted parameters are near a constraint boundary. >>

```
{0.884473,900.552}
```

```
fit2["ParameterTable"]
```

FittedModel::constr: The property values {ParameterTable} assume an unconstrained model. The results for these properties may not be valid, particularly if the fitted parameters are near a constraint boundary. >>

|    | Estimate       | Standard Error | t-Statistic       | P-Value      |
|----|----------------|----------------|-------------------|--------------|
| k1 | 0.0358445      | 0.0100453      | 3.56830.000675251 |              |
| k2 | 5.86338*10^-13 | 0.00093709     | 6.25701*10^-10    | 1            |
| k3 | 0.00149675     | 0.000361176    | 4.14409           | 0.0000992386 |
| k4 | 0.00299315     | 0.00200746     | 1.49101           | 0.140722     |
| k5 | 0.139783       | 0.0346422      | 4.03504           | 0.000144338  |
| k6 | 5.86338*10^-13 | 0.000299243    | 1.95941*10^-9     | 1            |

```
Show[ListPlot[vn[[1]],PlotRange->Full,PlotLegends->{"blood","liver","gi"}],Plot[{fit2[1,t],fit2[2,t],fit2[3,t]},{t,0,1501},PlotRange->Full]
```

```
]
```

```
!\(\*
```

```
GraphicsBox[{{}, {}},
```

{RGBColor[0.368417, 0.506779, 0.709798], PointSize[0.016666666666666666`], AbsoluteThickness[1.6], PointBox[CompressedData["

1:e]xTTMoPSmViYGCQAGIQDQEqDodu7W3Ms05zgPDtHO43CS7ITq6D8j0dTgSw  
qG+cWwDhNwQ6hITbnd58JBvKD3Nofu8++8usDCg/2oHbxf/Uk59Q8xwSHPIy  
8qeeMU6F8A8kOXQcO7m58UcyVD7VIdrro08zG5R/IN2hg//Nj/cXEqHyWQ7f  
Slsfy/1KgMrnOMid23S3uA3Kd8h300Adv291VTyE/6DAYe7Uf/nbbsdB+ApF  
Dh9PZM4MmxwN4S8ocbhXGv6J43IEhJ9Q4eBx4fVEu6ZQqPoah7uRiwleTQuC  
mlfvkG7Is/l1fwCEf6HRoWL/gSTncF8lv6Dd4YDUxgSd7W4QfsYEh12CYqKF  
Fg4QvsRUB6llPz4IX7NwuBlf5i93YqbD4oJHASIPjR0AW/t7+A==

"]}],

{RGBColor[0.880722, 0.611041, 0.142051], PointSize[0.016666666666666666`], AbsoluteThickness[1.6], PointBox[CompressedData["

1:e]xTTMoPSmViYGCQAGIQDQEqDj6iQfMfNHs5QPh2DvvVBKQFGxKhfE+HqNRI  
W+wEUiD8hkCHY3bb206YpUH5YQ4/fk7h+MmaDuVHO1ytDPlzvxLKd0hwkHzz  
UG3fWSj/QJJDZHiC8pM3MPIUB+f21Bu8lhlQ+XSHm27TJx0ohPIidshzEXCM5  
1SfB5HMcnIWL3q/eAZPPd/i7+/HOx7ug/AcFDnGS66/wWWRC+ApFDm5uSXcn  
L4LyF5Q4ZJX/W/x0XxaEn1DhcM++MPqbfjZUFY0D11rbRT8WQeUf1Dtc2HLk  
VMYxqP4LjQ4H7KxKVR9B7Stod/CLaPfyJAcNj4wJDv1vs4VIVZlglfImpDimn  
2he88o9zuBlf5i93YqaDssP0XaWM0Q4AGVI14Q==

"]}],

{RGBColor[0.560181, 0.691569, 0.194885], PointSize[0.016666666666666666`], AbsoluteThickness[1.6], PointBox[CompressedData["

1:e]xTTMoPSmViYGCQAGIQDQEqDg656xPKDqk5QPh2DkI7lyVuiYmA8j0dpvAK  
FEbUpED4DYE0Abyup7nrMqD8MAcbhbmKLPXZUH60g9WSpLXZ/rkQvkOCw583  
ZnEbluRD+AeSHM7vEE0XdCyEyqc6fHRYJ8eYUQSVT3fIFbc3SppYDJXPcmC1

bJaaeaYEKp/jYPp0vSnD/FKofL7DhtUng6dxlkP4DwocNF98m7TMtALCVyhy  
WKzkpy45txLCX1Di4LOvTndKezWEn1Dh0HFRIijLoR6qvsZhv87bK3OsGqHm  
1Tus8FvzQ/t7E4R/odHh7/Kyh5vWtkD4Be00+wXOTm9K6oTwMyY4eDx6+nLO  
l34IX2KqQ87G2+msrpMcbSaX+cudmOnwjPWGe/nCyQ4AnCZzGA==

"}}}, {{}, {{}, {{}, {{},

{RGBColor[0.368417, 0.506779, 0.709798], AbsoluteThickness[1.6], Opacity[1.],  
LineBox[CompressedData["

1:eJwUV3c8lt8bRvbmTffeMjNz3tteyd6y9957vKRIRCpRkklWschlPKGM4ku0  
yEwlJEmyin7v76/nc3300fe47vuc576EvSNs/MhISEgUqEll/v89/uv9zygm  
ErylhWDDrkwZzBd+aV6Ln8Ubm/y54nH0KmQM8cc0xH/HNzD62a45X4Ec389G  
P7m28bifRjUx9Zdg7LOmXX78Ad7t23cLWv5iON8y2IwLJgNrh+WVf01FcD86  
Wv0jFyX8bFyifNh5AXY2Bw1S4xkg77hD3TXWPChwfvKlqpgZ1Bs2bzw+kgu3  
njDW0QWzQsG3G9VhAmfhAbdvaLQuG7AfTaWO9siGZ0lPFKa4OKAfZxr89FkW  
vJ1i/IXf4ISfzoXM+SaZ8FXT91H1IDc8/nSNuvBdBtDtM+rExvMDu4NoZRFZ  
CvC5+JJMWwjCUsOtk90LicA50/OxolgiSor/1R6uxINQQY6+XbowWN+7/nOT  
Jw6kdZTvUgWLQJpkvmZUZAwof5+h7LQXBc4J06s3vkaB9o2cwHBdMfhqbVD4  
li0SLA5mZN9ySUCKPHij/wkBh8acglxySVBht9Ns7Q8Cj1PKP7Q3JIFP5tyV  
T10BEMgwa/VjWgremDY3Kcz6QVR3TkvloDRomOcUuor6QnKYMptDqwyQ3e+7  
5JfvDaf5Z+NobskC5fdM02J2L7iSpqwZGS8Pvo4zGo1/3eCm/Ow1Ue+jsP/x  
eNnnFheons35+85CAY4IDNa5XXWCSSNuhX4+RSB7qDsXV00AMzfx528WK4Jk  
94FOy4wdLGw/K0qkVoImmX/lfoQ28OVkma5NuhJIRdKf+K/FGtYP9e9QBCuD  
h0+qXQzVSdh04Labn1eG6f/OP92qNYedpnXyJ/YqYNvzfrgpyRT+Uj5/WDys  
AnYsWxML8cZA4lHmH6qrCtUbV7hayw2BvD2c06hdFfZXffp/f9UHGiaDIUH5



Y8ATvszzwF4PWJ+uS7/mUoPu2MvLb3jxwMH5/EPDBTW4htuMkKs5DrwRZefP  
kqtDNsmzSElflRAaDD/umawOlaxkp1+f1AAxQYPvmhvqUN7qxXHDRw2kErhv  
4vw1wK57qUz6lirIj62f/D6tAQJ90taRh8qglHWXDGoCfPav1dZ+BVB6324  
V7KOFnynvP5tsUke8AoGrHatWqBxP92011EWDHK4n8lLa4N31szRgqPSYDK/  
HkN1SxtWlQh09UqScEL9udhHtuMQpC9nuu0mDtaFZW878o7DXFhNPmoUBRe8  
gXp4vA7gs0Xj3R8lwdEcmZtK2zrgm3zLdPycAJCNMVP8jkPAUPJskfEHL7zj  
2Al5/BvB88OVYOkCbrjnPjuREoeHmyOh42YenECofqaJ/42HD7VMX/96soPM  
jp1VphbAJK64Rv0CDth4h474JAO8Nd2kh08scli02w06iDivvrnFjRmWvZuC  
JfYBfntllH9bZ4CJs8IC1Fq64GSryXnKiw666i+PryTpQu1p1b1COhqoGaU6  
M/xEFwyORVI0LVNC8WayRuOeLvxo8cvJ3yKHVI71bxc09YAr+c8zStkj4K/l  
dSsySQ/uzp9eOZ1LClbub2xsnuhBtb2lykMaEtDKMqZU3SPi7Jx9NscDvFh1  
xxN2TX0YaeLiTH23j2d8KR+2k6gP2UWPis7m7+L3vlclTT3WB1qsciAndhv/  
mYXtTceuplvzubOvl7eFHz2Wk1OuYQDfw/Xyh19s4h8772ulJxoAmv3qdEXh  
J74yLWzd47EBXJAU//0o8gc+//bCb1da6gmFcV0+9bw8f229qIahnBldFrO  
7eQq3nNlgloi0RCUOxSH/zEt480ZtLqW2g3hy1qCSyXZEI5NqTFiaMcQMLqs  
IVaRz3gheyHRenUjoLHi05MevlinTbr07nyCEXCuBVIGTy7gt8op88LajaBm  
rvK+5vgcfq4nScdyxwgGZHVkFRVn8EOf1zYU1Y1hUOra4srQFL6F2rOKNcEY  
5vo7yn9deY+/IffaceuRMTgm/Vj4U/wWn2tlRPdu2xjyF/ayfnW+xkfHPsHa  
1UzgmlRVBRvDBN6tVC66LN4EcnKe0+xkvclbdd0ST3lkAp/PNFSvqo7iFRdY  
p9y2TWA3+S2v/+1hPA/52XykZgr+1ru9wkYv8ORSe3iheFO4cVNWxVJgEP/D  
PPQX6SNTCCSltigU78d/ijiv/vTbFHLUjr2cdHyGf37JxqX/mBkcnqluPPug  
F9/U3s9QE2cGwY/GdFQVevCl0xq9uQ/NgC+i0rX1ejc+69+92ODfZrAathCs  
w96JDxUVlDpxzBzAjTD8vf8x3sG4eFo+zhx6vo6409U9wuuGUBQyPTSH8GwJ

d900NrxYalezy1zS0beTez63YLnaP32e0L1BCxQq8k8d3yAJ3nvXtcWewI+  
MLKOoI77+NX9cbeSthOQejaJg0DRiH8jYMicuHUCTGnFJBbP1+MxvcfPnFUt  
gO351pCeSS2+1l82QTvWApC1oAi/WjW+00+mDH+bBQwXhMqLW1fhU5tY5g5/  
WQA7a7DjxSuVeP+J7IsLKifh7EfZwpF/FXir7R2DvpiTsL373vok9y28Nk/I  
7p3Wk7CLnVWwiC7HP1+M2zD9cRiCpV1uNMpdw5+4R1j+IWMJzOu70Tnspfi3  
MecXrvhbwnZSiTe7dAne/XjJpHalJfB8fBtA5nsZ/5X89quPs5bA4ihPyfGs  
GP94yf7zM3orQBZJlin6F/G69z1ngkys4FcqF1uUdgH+LM5/8ri/FSw00Aq8  
+JKHf5kQ8oYp2wqmycyKxp7m4hlnl8t3raCd5QJp/7rP4u3gfiRh0+tIH63  
Xk9hKxtfUpUylDtrBQWDHIO9xqfx09Szz13/WIFqAeFEUXcm3nf8fBepujV8  
NRSRkqdNx9ceu/j4jZ01vHzldGT7Tgr+e1lJW020NeixVii9CU/CKx9eb04u  
Iq7jbPbf+Cfg471vN1g0WUMpaVWoU24cvmOgulZoxBriCcPTvK9i8IcyDVW/  
VqzBJGjr4qFWND7n16PyMnEbmGw+4L88F44fcewqDdW3AbMQ/YGggFA8c1fv  
ZbyXDTxfapxvEgnG2wkNFrFm2MC1Qum3RvSB+NLskfwv5TYgOp7JdUPIHz+z  
PJ77uMMGvCUbr6q4+eKFLd5nn5+0gQpzlFXPnd74evbFVCU2W5h81yH64bEH  
fj3payK5si2sDFePHVc8hVeZW4t9b2kL2tqnfOnXfCjepuR9WG2cPXrixK7  
R074ruqd0LTztnDiQpclc7cDnoTuINCqzhaoEi+Yya/Z4Q0iyPxEB22hOLDF  
yQ1s8f+pM5x6QWYHb848u1RywgrPWS7qXC5kB6c0qGgqDi3wDiRc9hHIDoQ3  
c/J9y8zx13z5rfXc7MCH7I8ih58pfm5IxII92Q4c6LM93p8yxovIS5kuX7UD  
w3cM/YIEQ3zARXnDzod2sKKQ0ps2pl/fcNbQ8fppB+yn3PIInnwJefDPRVGWy  
B64K8YInEwifJKJ/jEreHqWzNc6nux3HY2dNID6Y2c085d8LjVxaeLjvFvKN  
gfYQzz9TxXpEA29kaStNOEvEAaqpvFxx+LxWJ3HbKnuYezcXE2ynisel+vDv  
zdsDU17vCPExxTstBHKPHNhDK67tSneDar7clJz9Fq8DHNPvWmcVI8cv1Maw  
RGs6gOcerYj0uAxejCGJwdDRAcYl416uNkjha6PSabjiHCAqcTTcvU0C3/j2

NMW3YgdgL+XcEPkshle7eeGgaNQBTv24rv33vjD+XuWm6ug3BxgOUqcXtxDC  
C9U4hNLROBLnt5QqK3oBfMm9jjsmEo4QT7dwI/oBL56uWWD6jL4jFBWOLAyD  
4cYT2rJYn3k6AtVTc6GxM5z47cdLpiTppjB+beYjaRM7fqG36XHyY0d4tnMv  
4WgwK95+gHWj/a0jaIZFyE7uMuNfvoyX/L3pCO1u8rBgwoSHsQ/uysxOcD9Z  
NevYW3r8w9eojELECbReHd8eK6bFy0xW/tdg5gQyGQ7KC2nU+IoZSorVACco  
NVvgu1ZMic/7MhrjW+kEiTk+lY5yR/D/VpTv3X7qBA+uuHYO3yPFx66XLM7N  
OEGzWeOcuSkjfnVzn5tv3wnIYtYf0VAclO8dd2tnTmcoNZcymK7/g9786cst  
UXUG9fjH3nsZe8iMRLLnTbUzkEUq1vkTdpAqzY+jJ/OdQcxq7EHw9i9Ux2Dr  
f770GRga2yIY/TeRAGv7jaEBZ1jcwv1e2dpAlzl431J8doYa2dd/3XR/IBre  
DHp9UhfWsx7WEz26htIFP+kTBFxguXiXZCx/FW2JGqd0a7uAqTy3pkLiMpqT  
Y1pVj3cBrw23adGhz8hWKUY47pILdHlcP88g+QkNHXvv1NLsAtFaa78nqz8i  
pKVd9OM/F+irvDByy2ABtaJbg3LfXCAnN8hW7u8sktI/8i+I2hWYm78u5VZO  
o5vGAWo14q5geLRP0D9xCuVaKdwV9nQFqAlrelv5Fh3YXZpxT3OFm/cGk75s  
vEbRzju48muuEPoLLIW9JtDyKVfzqXZX2Bv79qpz4xU65f00i+OtK1xf1ghZ  
1BxDE/6iHbabrIbm0k8ZMjiCTEJyfhYxuUHjTpEInH2JlGMtPenM3EBIUOc6  
V+4AqklsVWoS4AaCKnAl8dlzxJfGOXYm2w242fmFzUWeoeLMFMpnt93A+WY4  
r2xlL6l6O69D8tQNdEnGPFuhB6Xm6cfpzBB1AuQwPN/uRpsXahqS99xAyKa2  
rOJmJ5q5GsH7W+UU/PlsfbI3oR1Zl7+2UbY+BZJLB7F5lQ/RQIV6XkT4KQij  
t/4vdbMVHb97vbfh/CkIsiT4U/m2oAd1/3ZXak9BfteOoulWM5Jo8lGUHDgF  
L0tJpML07qPylsEA30+noPIXx73c8QZ0trPw3Ry/O3huz2N0GbXox5+ElBld  
d2D0YvTgCKtGTsc9hU6ecoe9GErW6Jwq1Jtq0k+R5g60i7hY8uFKJNOtGNxd  
7g5y7lnCraq30aUDLqa4LneAv7Ipd7Juob86pG1yM+5wtoiPW+hDOFjPX3H6  
/McdOC4nOEwGX0Nj2PjBdV4PGF696VeiWIo0/j2ptNX2AMPErUQxyRJUia80

pnP1AGaafs4TZpcRHSFvrS/ZA+xjOzkYS4pRbE/0xeRrHtBJa9MnQ3URzZK4  
qil3eEBJRgob7bFCZKSrP70y5QE8jAFd/8ry0f1MWcLtPQ9gr33l+lctD9F/  
PFfcQ08Jed9jhQYochGQHvrm8nnCQBB9utuRsyh0OFrdV84TehlOhbfLZ6N6  
3SUa004Jzw7aZYIIWWjOy2WG94QnULqHrx3ZISBc1mjTjqsn/K2qnFLhyUAm  
lXqZr0M8YezQ52VyaipK7Xtkez/FE7zTzkgMMiejB4syEufPe0KqVgO5yocE  
tER2a9f/uifE/76zmpAmDvGI4ob17nmCeOvTCuY/MchSP+eGQKcnUCfaCCaa  
RqNsnz8R+y894Y/JfSTdGYken47Qe/fBEypueRRYIYWj73c+sbWsekKc1MpJ  
9oMQJPLc8WvBvif0nxAoIbsRhBw+Dz8JovWCKlnPvusxASiPHPINebxg/hOT  
im+KH3oq1uYuLOMFFpcvGM83+aAtAymIA00v4JRZn9+n9kZSfuVHpky9oPf9  
rWHSc57o1Bnmd230XrAxbFkc5eS0iu9m1xYFecHoXr/2+KwrGujfTQ5N8gKv  
c64Cbdec0Z8voRYm57wg6+WL5/dyHJEi5UdBsTlvCBd8Sx9xwx75Sthv/qv1  
gon4kxdFZ2xRmdGL590PvUB25u4Ak74NGvXXudo+5AVzbHy94qNWiCznQdCl  
SS8oGvkkfX/zjFKvET8esewFVLKvGo5mnkChg2WM5rvE/WPpKk14M1TxleGj  
BLU3HE2hF2GTM0FvqLJaybi8wYtisZvWxAjRSG2fmZP0hlGJ6XX3QgOETIKd  
OtS94bA/o27qQA9FB87JlBh7Q8wLx0X9Ql1Uk2tzEOXoDX6c3wr88YBmagfG  
LAK8IXFC/NkqB0LML7QqpR08QXUzS835qzYyXGmKpcjxBtEZUi7xb5oomUbU  
+GOJN/DXfH9Bzq+BmqSvcndXe8PPoItNTQlq6JMp3VrpI+K6tobU1G9VxBWc  
gcUOeMPd9Nrxo5dU0Im8X0VW77zBiu4c4YyVMsqsd/CRW/KGy0dcSt1lldCj  
l9PHqLe9YVLB6mGkkCJaXbWk/kzhA9+b4etx56PlaGvlWzObD7gH0mXPP5RD  
lQenx9JEfaAus108WUEWHVIKtJop+8DTdvTa7Lk0cmV+XMKp6wPM7BU3/8ZL  
ocfcNsmfLX1A4s+P4XxDScQmunbqgbsPULX1HY2RI0Ajx4TEzVN9oKNf95Mw  
XgxJ4Tuouc77QGwLx8yUjyjKNrFb+1xGtDd5r/Z+qQhasF4fe1DrAxej6rf6  
54SRjmtua3q7D5DVbbHtqQqja74iV80HfCCuk3R2qUwlbYd1JXO99YHfX0yE

5OmFkE2Cg/uXTz6w9zLL9zWbIGoib0i2bPoA//rzkVgJAUSblyeeQeoLMk4V  
7ZTm/Mj/khjNCWZfEDHZefshiw/1lWNRXIK+kOE3yppg0wosEq51efZH3hQHO  
y/fYJHhR6v3N1pbjvIAy8Oj3QgEPmnycfzXD3BfOTVWpsZDxoKLhHnfulF/w  
brcmf0/NjdbeuOgtJfjCLCH5U8J1LmQytyXeetYXRv0mgw/UuVDV1ws0hCu+  
MHJ97x7bLCci/Sn1/USVLwQ7hT4OPseJ3Pf7XnG3+oL+OHa7QZsTdRw51bbU  
6wtb2hlJOZscKjrjYgph3hcku700ugI50KigrIfui9MokWjSHEOJCPdr8dz  
4AuPcpdzoj6yo7PKHhJf6fzA+ZUoU9h1dvRJe4+mjccPbMxF1pls2BEYXvp0  
kPYDpBCtRkX0jspPyo9baPjB4we39/7dZ0N2Xl6lX+39oCpwUq1+A4eag/+k  
tPn6wVnuqtqKbByij73ikRnjB5YWa6QVnDjUf/aFBO9FPzj/K7Z04jgrUmtQ  
enhyxA9a+pR9z2Qyo+KHw6W8035AeWHjzF9mZrSO+aUur/jBBPlsvjyeCdWM  
l+lnUfkDK9fU7IMYBsS1QzrxUM8fYu2TpkR7aFAsSfnDLGt/mM6/IAEj10gV  
jVqZpac/nHnUnfhxkgrJ4V6l8kX4Q9Lp2eyBH5ToHF+w50qaP3TdKJlpYaVE  
S+LkBo/y/WFR+d70Pz0KpKdwU/L0dX9li5ydpawiRzc1NOis6v2BJPsHEh4/  
gvZ1J9b5nvjD5rU7LrVKR5BV0FEayRf+wHQ2/jPrNTJUXZQnqjTlD/+dzjmr  
y00G/rYv6Wiv+IORmsWrb62kyHZez8lwzx8u4snsXgSSonrKW9GWNAEwrktT  
eVGLFJec/ZPvzB0AwwNa5n9lSjGDvWONj3QAID2JWojRjkUNqa29YZoBYBND  
2CwJJ0VkvUwzCaYBENhkyKrWT4qchk02M50DgDt/MmFVhww1bQ4y5wcFAE/S  
y+rLo2SIgkdMtiQpAGglJzu1448gN12CYcW5AFj+rrDcrEqOWgJnPOrLAqCZ  
Scuzn4YCURdpJLfvBUC0soaD2W8K5N5++TL2JADU7vz+y7xDidrmNpqGXgQA  
5X2dnFVGakRLafFiYioAvlZOS9Yep0HtdhSHS3sBwj5glMA2RYcYU724ftIE  
QszPuvN+xgzl90638h/uQPiwU5Q5/5IRMW/GBTBpBcKAQF64KTUL8ueeyOQ2  
C4TyyxF7hissqAuOlou6BMJk0Ha43RQrCipceqWeHAhzjwj+LWtsqOer3jfd  
vEAQcLdwpWHkQBxzNylOXAuEQPG7em910FGfnKOWZ0cgQEzu6lfn3lJlRtUu

+GUgGEjPfuHl4UXhKUwRsR8Cwcbd8u1CEh/iftl4J3c/EPKrBEQo7AVRbIAG  
wwOtIHhZrjrLdF8EvbxwWbLTLAiU4e3arzhRJPoQ7ffJQhoyThHpZAY+o+8  
Ln4qOQiuMhsn5r8SRxKV3AuknUHAeXfqSsQPKZT6Im6fbjgILHOPWDK2SqOJ  
jXE2jukgWFr2HKCPIUEZ+DxTmT9B8Mg6w0JxTRa981/yUaULhvqfVRzOlXJI  
7oJeOuINhkA0SLNiK48mZ/ZbbLSDYY5heMGw5ig6Su74n5t5MFhLsaRzmCig  
bNnWr/6uwcAqyP/YflEBfbBhIosKCYbDm68e9mkpIqXkEL6UIGBIXa7puERQ  
RLm3B9XOnA+G7xe/T7r3KaK5IVHrwuvBsHvuoHTknyJS3cgIKbsXTLy/g0/l  
1ZVQHufMmTudwZDdN/FALkAJ7V342u09HAX2lGTnBS4ooUDKX7+Fp4MhdyLZ  
8u89JfQu7VD+42owPHrtq/bfUyVk+JvGv2I/GKIffY0vHVJCbaHsNz1oQ0BP  
UtbEr18JiXwWeifAEwI9Ew4ftR4qoYuucoxz0iEQ7VecJHRVCZG8Vje6oRkC  
m+cpTPiDIVC4mX66m2kIvNp8f1pDXgnN9p58x0scAsVGSr5J84rohKbL+ofA  
EJhQ0RT6mqGIOpr9JK4lhoBIAOePXAZFJC0V5e6cGwLMPF+ZRhgvUOmt1BKu  
0hBQrFrVp5uSR5ScuaPva0Jgpj93eTZBDsVduER5tZ24f5I51GZFBn2mulUc  
BkNgV2XielKsNLJjq49nfx8CC8p8L1yOS6LerYdNb5ZCoFweZdDxiCPF0N6l  
S9shkjiW89/VPhF0890Igc1lKLSlGIswqgohBtdJB1aOUDAgU/5+b5IHrZr+  
GCg6FgpSvFXO23X0yLl3/9DSMBSKhlYqVl00diY0KNWZ7EOBZEhKtmezslut  
mSVi1DcUStlPLxjYkmB3JflrCmJDwSR32az3ETPGdktq/kQ20f7VBhXxcW4s  
i0OVk/5yKMRk7VQ7YcKYJ4V5Tl5rKDDyatkEmMtho6kOT02fhcK279w50yNK  
mM6W1w7161AQqfS8Rk+jijWEhCkMLYaCBVfqnd/q6hjPp8SAnM1QWO5kuxGX  
oIWdc8m+ZUQWBqNX5y/IXtTBdscL31OwhkHiMUGGPWXA/E2vM/ULh4Frp1ym  
ZbAu9ran2jhbKQwI6XJMmLseZqDRkqGvGwalt5SFtEn0sZb73e1k1mEQJLfl  
70b6mLDkix+9nmHQn14ZoUWrjxXdfCOZGUlCt1cl1NnoYYfsCx5ACIOBct1  
B5wuFlbw7eq/wjDoK/IRL0yKx2bId8awW2FQ/okpV9pbGzNLJaNOvx8Gp0cL

RuqD1bEnvxhA52kY8Byg8TxFUwqhDvx72gYnJPdnD31TR4rWRRr7pwLg6k0  
0YPdGHGMwkVxOXk9DFoTk3187vJgsePaQlqHYZA5Vv/QTJwKWzQxdtpjCAeS  
0snP0uKzOtY9NkWP+cOhg+L15tMBOtSj7j6UIB80HrOZUylPuNDR+0Ek6jrh  
QD7+yIRAIYxuSMRpbJ8lh1ffSbXEBsUQ/U1C5E03cDj3gmH1XaokSmbPr40N  
DYeVZcOsfJptJJ/dUElNRx+vGKX41eSRk7kd7h+nQ8HPOUKM92SJBplabJq  
uR4OCwyyLl1/xNCxX09yo+6FQ0NxXG1ziRAasf02LtwRDm6xlmPXejmRdxsf  
78RQOBT5n4mTr6dBu2wnfbPehwNh/6lS09WMzoW4jEblpXCoZb5uKVxlhom9  
a95e3AqHnAERtYB+HNaptoi/dCQCvG/QT3pp82M2V3Hn9FkjYHN7iuP7FRFs  
ecdg4pdQBHSMVHy7nC+OpTvF81YpRIC+boTWWz1Jj01Jja8digDhep1jliOS  
WD33VC05RQRc7QkUP7gjiekm0+60uUZAoksTmcS4BDb5QRv8giOA2cDmaKCT  
OBauHXaOPSkCHv8ro/FGohh5+c2J/pwIqPr24veDHCHs2t8x3viSCBB3t6hd  
i+LBFE+R+kncjYBziyt01xtZsYFu5aZ3rRGw5PflgePVI5ibg0/O2b4IsGKM  
ouK0uavzK/0KqI9HgJhk5R/GBAqUNz9w7ut8BDxLdc5L7WRDQrA7cXU9Ajh8  
WyJzmvjRowppPpODCPic8c4goVAEVRMalf9SRMIDPQbOVHNx9FPRyNGOIRLU  
2f1d415JoOMf51Ia2CJBppn7x8hnCZR7MaGCnC8S6ocoA1QZJNBrXeZ+N9FI  
aPM7eS/5rRgS2KxdaZOJBK0vrAWjLqIouFKXkUE5Eqjvxs+6dwijhzYflP00  
I6H8SHmYC4sQIjkS49gNkVDYbca/sMeHzFvpUtlNIuHGvQdpT+R4UIIPVUWY  
ZSRIWZsYyd3gRB9xOv39DpGg5CSQfduOHck9f7vC7x4JUYYenv+F41BCbDhj  
vF8k3LmhRu5LxYr6xKhURkMjgfBlrJRbiwUxvr3IKBEbCc03HYwrRViQ8xmN  
1PQUIr6X5tH2kAVVHRuveJdF5GO/bUo4nRVtfAnqP5oXCRV60fyfPHBlu4Rs  
9ezFSDAlkQqkNWZDZ42uM86XRsjtN7OdOkF2NL6toqJeEQmVh2bUb96yI76a  
EcfCmkg4qnlj8po9Bwpw9Ev92hQJvRskmtM1HKiF6rAC/4jI7xj2i+4zBzpo  
L+m/2h0JI9dcv+1TciKTQIXVH88jYVlt9PNwBk50mWuI0WQkEILOfhQ9usWB

5oc8VSpeR8J6qEjTv3bifJ6057j7IRLURksDuxw4ULx0carVYiQ86/SX6v/C  
jnqnZG7XrkRC+rFEbcEYdkSf96yf5GckNKL13PE+dxRy23VaTcS6j58EeG6  
zYYqV7cYH/yLhCF6Mtd5Czb0/VqBCg1VFHhNfmw0YWFDGuYSTl6MUdDO//7b  
l+84dPoPlvqEPQpEq3G5g29xaPSe420W/iig2FEJNx/AIR63jf4gsSjYLTcG  
/4XhkB/9udVe2SgoW7Z+hX+KQ03DWfWPVaKI+vbsszuDOLSdlxp8XzsKalTO  
9Yy+xyFkFi9TrR8FE5bZE+lrOHSWJnK13DwKaNDS/dOkbGh0KKj+km0U+JyJ  
+/qEjQ1x5PoE57lGwU7DLtWhKBtyNz4lk+kTBTPaahVy8myomtJxNSEkCiSf  
bCGRo2xovd+qPjwmCjiZHjROSblhtTNmwX4pUTAq2UyXKciG0g0MZNxOR8Hd  
70xxaexsaPAIWrU5HwVaR0oIWGjZEPmz9XrTS1FwII75VPoBDjllKQXD9SgQ  
qcXbUxH1zTKJ+Kr8vShQ7FSUq3yNQ4o9AvVirVGQ/prpEz+Rn8QMrmDezihw  
u5zTu/IEh3oQqwzrsyjonVQzyLyPQ9SHdKvUw0Q+Urq+etTgkFU3Rf2/iSig  
dmqXIq3EodLUf0HbH6Lgg8nA6YVbOLSgvSf9fTEKDOP5/srdxiHpP5srn1aj  
wJ6qToysCoeiO9bqPmxGwSLN7ehOor2OpKWg8f0ouH2F+wOuAYfINBekh8ii  
wbRP0nKgGYfMdqdWMNpouFiz0F/wEIEk21/XPWSNhqOnnJXF03DoQ/x/QQ08  
0SAcbPbdnFhfEbVB6Tsi0TDhGhyP680h4N89K2Uy0aDEo2AQ0Y9DLW0ddUXK  
0VD7LrpIYwiH9mPagnK0oqGgj+mKyUsc0lNpkk7Xi4YCpoXzicM4dH6zZiXW  
LBrG1rubbhPxmwe360JsokFjXzn/BnE/X9T11G+XaCABvf0eSrTnq3hF2tk7  
Gtb+nPtJRfTX8OPCimVwNCzsl7Na9ODQVINunVF0NLzUnXzBQ4z/eHhWkE5y  
NFw1ri6ybMGhbPIUadWsaFA5HbXwohaHRtbiVmTyouFcSJVy4A0cYmulqBMu  
joYzCXUkNEU45BYSFMR1LRrYBL49yyPgUJWMjzRTZTSIvHv9e5j4Pn1fcVuh  
qCfa5xhluueCQ2p1DnV/H0SDt4PBeUoDHEoPtAr69SQAoulvf+ySwaEBSTPp  
1d5oaL5/Mr+BEYcYv+qvLLyIBpr2dvK2H6zIoVqn7v14NASWGT1/8B8ruumn  
HjQ6FQ2P//MzyK5lRUc/y6x0rkTDR6p/IcJ2rCj+jlhdy89oKppjQVknxooow



b4Ggur1oWOR7b5TxkwVRinBJV5DGQO8ieU1WBwuy/MiyUklTA7jnuhUXM1hQ  
aQVdXQFLDLxU372XByxowYMiKJs7Bg4ValycD5hR5NzucpR0DIysjl51D2VG  
J4rPKH1UjAGuhLGpLVFmJGXEmmylEQMz51HgejMTWmiUpVMwjoEKv/4D8UhG  
10X12PbmyRgwqlu8JzvAgErZDcsZHGJAPJNW/D47A7JKc5df842B5r9fWN9W  
0CE5pW9xrqExsFYzZmc2Q4uovyRgL2NiIGtb4e8iMy3qOXHRsi4rBhbye9jF  
/KiRIt/zKP+KGDck5mgMbSdH9K+sOt7WxADSqLPNfnIELZ+eJTO8HwOvpc9f  
pm0jQxXfti+JYjGw41mTQV1Mgpg7pR8tTBPzYQ0JrJzb0dlwLtx34YyFV7+D  
Ni3DX+iMMPDpvxSIBZJHlrp//yvXqe2tPa8pEQtQn3ZVP6av2106j4/rWCw8  
HiWxMCuZ7361u4Xe2sSC5XXu7B6XX93NV11OW16lhXbbsf9YCyiwfPOvw9iV  
WPB8HZ/ym4kKC/wXw3b0RiywgOrB9CVqTCig4C59Qyz8m7i79r2MDitS6xl8  
8SIW7NyexNV2MGOhqyeYNcdjgb6suignggUzuTnlVDsZCz2IVytthFkxEspF  
K2e/xkIDwTS4LxmHRbwVpzegiMgS4ueikN2zEkp71MBfRykFA7xXLzIgUHB  
esd7XBzQVv7ZfSnliTEbtgeFiMSBCLtjAZLnwnYreHUfSsfBhOfSck0DF7bw  
N4Prn2IcuNv/4dAT58aa20wGi/FxYMOUrcBHyYOVMjfenDGKg4Wn7r2WYTWY  
IZQlXuJkHFz5kR+JG+XBAofiLCLt44CMTY9ZUYoXsxb7INbhFgeDIQ9iwlN4  
MS0C+nvENw4CWJjCrw7yYilzla8tQuKguCbmUxE9H0arQXXvajTRf9QvqzNm  
fNjmpZCsJ0lxMMImFCaZyYd9+DHmLJsZB4+mZOf4m/mwPnNVpbjCOnilMjVj  
es+H1deUUj8tjIPgr3W0lb/5sEtHDuapr8bBxlNCQxodP5bq4dVuczMOXKb+  
rRtz8WO+nf0Xyu/GwYUU5/4aXn7sBKeM/1ID0f/607f67PyYaswFHcW20GhK  
8hvoI+fH+MY22ZI748DBL1VneIUPI5d1XHvWFwfKe2ofjzwnw9bOdj5jeBkH  
QmmDjrhLfnjbRcHrjuNE/xqexhUOfBiGsqNvT8ZBdqyKgZUjH1Z9bdn023wc  
PE+IknvCS92YfuE8LGvcZCVZxPc4cSLxds82E1fj4PyLbKup6s8mHsT+6uh  
33GwevCo/3QED2ZEm1zDehAHJ9Yr5BuXuLGj/nPpbuTxUMrwwq2zRkhvj7NNz

qKYj4jvzzS/ruTASgRr5DdZ40Ngt5aLf4cSWk+gotHjiIdLW0sFCIRN7rPSm  
9T+peBg5ntsSTGDHKgo0znMqxkO9S8j0pQtsWO5KubeXejzE3+S47JiPw5xu  
+7H8NowHk/YLFqb2LBgcvFhGFvFAyddz7bkgMyblfLQn1y4e8PkUwqvNDNge  
8044n088WONo+YUkqLHFUFcj/+B4KPKzGSiUosBeDj3lb46Kh9FM982b5GTY  
NULuiD4hHibvbVFFVmx3Z82s3SnliYe1tuc0Wk3r3cEa1invL8TDVkBihYXm  
fLFWBrdMyI14INz5xXQ5c0FH5EQ66cOqeAAyze7JLxs6tLWLk4f3iLidiT2T  
ZV9n2uNeTnFHPHhms8ZTMFKh551MHjO98UAifc3Q+gw9auCMVZN4EQ+v+AWP  
vJjkQaljx788eR8PPXIOUnxnMhLi8ypcj4emoMdt4cUeZHR3cGXeV+J9ifz  
lLzFBRFLik2z6048MFdtj//JIq2v3CKGvwj8u1/KoBBRwLNWM1ekaNKgFFP  
CnczH0uhaonAlA00BJh5tee2yXMUnb8ov/5FIAHEvMgVNBiUUEtTc9RiQSo  
XR5QKqRVRloTaUa31Blg1e+NX47TMSSoo/8kByVA7h/a5iBBdUResy0XaZQA  
Ex9tZfz/aqCxtEssug4JMLnwa07hz3HUtuyULe2eAMzX1JSQAB5dsxXYFFP  
gNvRD6K2GgD5StfNLMYRzz+uGX7JqI9ML4dbDqclwLe6NKdQWwN09J9KX+uZ  
BCglV5W/cdcQ7b7BarKvJIDvVfmB7zEmaBafzRN2IwEWb/lzNG2Yor560wL7  
uwnQ1BlygFLNUQHhTbTEwwQQK00/xdp7EkV/K/vC2J0A8fy5y8k6VsJjwcNp  
53kCpBvQuMeJWCMRuVWdoTcJEPgnp8D0iC2iunq/uXkmARwsDK3xa7ZojTRO  
tOxzAgS4aCQewezQRKhWSeZaAuQkvbBxCLdH7e//UQdvJYAbqZfS7qY9Ktfr  
T7H5mwDvTQJ863QdUFZj3roWeSIMVxscl7FyQAFcVl6i9IIAE+1Fo83mgE6c  
Zn9Dx5YIEaQSfOWn7ZHS+gejLd5EeH1v/znDZTvE4VzxZEY0ESaeBRtZGdui  
v8/85PplEyGyt9w56pk1+nhU9lajSilkf4q9NMdhhQbKNlhKtBPhVvXchsH1  
E6iB/FF2un4iEGKZeQq/mqD4DxBsaZs17dL0TViqLnI1pJxVd02EK2EF9uXf  
tBE0D1sK+STCnwNkv+x6DEnwXuyjDkkEYzvtDxy/jyK6sw7HfkYnwjsz80jL  
c2JoY403dio5EQ5dNqQpTDnQO9ePPH1ZiTBQ9Ysq5+m0TudAdUF9XiKQTraf

b7Y87K5QCiW5VJwIjzKSrc7MsmBnypViUq4lgth3m2LaXC4smGrni09lIAk  
C7eVH+XFLK07nE7UJ4K/Z1GmWyg3pjqbOazakgg9H0wHgmdYMW4TY8TfQcyv  
v1jqTNLf7sMW+gcUfYnE++LQv8RLij7zT4iuv0iEriHVNq3zPOhF7tWSd+OJ  
YKSy6G65LYH0ln9cVJ9KBI00xDsflqoy9ikoHQhEViHRrkXa1TRsZqK3L2v  
iRCtPWazsaaBmij3Trv8SIRqxncXajqPI0l/64z07USw1sYzrn/Co4r+umS+  
w0Q4f6qV+i2PLuIWJ4tPo0iC//Tt1jx7dFFxtkvUHH0SxK0Onk39rovoPreE  
4tmSwC6D7xvHuC7K1qcLrOBNAoGWT4F+YbrooNLHh1Q0CeRMf2j+fAYonqzL  
3VsmCe6ziyjmNODRDy82l2dKSbCRfCx52FwHBfaG2otpEv2d7OrvDdRCH4X6  
rc5AEuzwu5xNpVRHLgT+E0vGSSAY16LAKKWCXs/HGRtbJsFa73gw6215dAI/  
qlfrkASP+F6bxguIof6bEojGPQllcgfJT9WyI3SYrhnsIwQmtoZZByubOu2n  
3qs0hxLjfUr7ti7hCKbYraAoF5sEFZcpwodW2LA6vlzZgpQkmDJN7Dx9SPw/  
py5IrGclQVO6v6+CtAB2fVpDxDKpMf/bPPd/GC/Gpn2Rv/liEiwl5N7hqeBE  
Cq6tcLGUJUFOzqKaWwwrRrmvyxZdkQQ3s8dlcOI0WlBzNabXNUnGjuREFozt  
de8+3qRVvZ8Enmwnk5pud3dHcZlTXnlEjGdq2v926y+d1YQ7pNvdSdDMWREy  
dfoI8nn/569Dfxj0B1QGbzvToxk1u932kSQIvnyOeXSJBdmXNPziepMEfrZD  
WYITRH35m/xH0nQSYCVu/XUPOZCx/anVD4tEf9nsrJlenKin7eEX7dUkmJg3  
uxLTzIE02Rg/lv9Mggun++2awthRS4z/zMFuErzq6408/ROHZF9j791JkiH9  
1YC8iScrqlLmfP2UKhkS511fWc8xI/7iiFEhpmTQN2TW+ibIhEp+Dr7I5EiG  
zrK7zSwqDIjWqh/kT8ZPtF2TX+ipUe5zYk9+uLJYIOvOmOrTodImcc7q+SS  
wS7wtGtUBy1KjpBup1BNhsBaBoVXt2jRr9HMFN/tZGAR2Rkn+0WLQo9+aBzU  
S4ZX07/Yy5/SoS8FynVSZsmQ7XnST46FAbl/z6s6Z50Mqm2C+eutjOj9iU+3  
Vp2I8QyrVpkrMiOrBu3r5p7J8CaAK7mQhAW9oLtc0hCQDGws3VvYUxakF7J2  
kSEiGWRLxHXfebOizpcGBeHxyTDEbps/PseKVGvu5I6lJYMjv0oQmSwONZ77

fVrxTDIc8Wm69f4UDkmsWGRczE8GXLGkaBZRX90yqU7evJQM8ocE891LOMRV  
exhnez0ZKP+URyqW4dBFKseotkpi/jOnVoUu4hBtwP1Q9vpkGPI9I7knFYcl  
bwOPsLckQzBz06Ofri0rS9yja2DyN9vvr4HGjgU2jKtyNaXDAtnF7fMOHFo  
UejKIO5lMjDKc4Xd+cOKnApPuuMmiPlavje5vcKKRg+ofrN+IObnqFkt84UV  
GYT2nmddTlb4mlyGTaJe6/iQLMK6mgzPcglZ+Uil+t9U9QnLZjLoRdPnHMXh  
UHX7d0uW/WRAhx9aLaSI+vqyZxozbQrMSbbfAnui/j/Cw8bMmgKsxksLbiFE  
vRj1up6JJwXKbY/tGBH52JrP12USSQFD3CUBcyIfwSeNjhlUkBRWf/z7Ts4  
tND1L5xROQUIbufenibqeQfZjxSMWingiOoyPj8Q9W1ZdDmDXgpMnl6KGO4i  
6m9qORUGsxSwadx4akDEj+O/vKC3SYE61TlDXaJePvrlpie9SwqcVtu8ZtJO  
1Lu2Tjt03ilglFkxOtmKQzx9LBfogon2P7ltRBD9FSkOi9FFp4CA7HWm/EYc  
oryV3UmbnAKcSYqHp+/hUCoDsQHNSoGGkEGL3U4tjmys0yTlwLtf85JPiXq  
78DV5gya4hSg2kbjx4l4zimYg+ZaCoRLNgqdI2K7QdFG6soU6HS7TjVGPP/y  
2Kw+dX0KrHKfcVBtwCGoKvIA1ZICgrxA5Xu49AjVqsoqo4UkBc3PZnk1Pty  
mTTUVH0pIj7zZpn7EQ5V/ui7SfkyBbiKoscYiPlyuaceo5wgxlvoFueG4dCF  
kWMjFB9S4NjrYQ7aZziUXFe7R76aAswBgjqX/sOhDU7vIvLNFPPhhF6+V8BqH  
/M/ySpLvp4Dyc3Wx4SkcsvG5YHeENhUkfeYbX3/FoaFx429krKmw5WOgXfQD  
hxCQZpHxpMJkgXq3/w4OyfDH3ieVSYWw/sEFRMmGKs7LG5Eqp4Ltl65IdgY2  
xLG/NEOilQrcbJ43Q3BsKD+wIoZELxWmXWYXZLnZENl7Z1oSs1Ro7f08Dwjs  
KNEQd/ufdSp02nFkXhZhQ+utl+r/nFOBkUfmPxYJNuQrcnb00CsVhniHa09I  
saEPRXi/w6BUIPPhe6Asw4as/u3+OYhKhfe7Nur3iHggrKX4lCkVvJeusu1I  
s6HjMyHSB5mpkHhmeNSEeL7FTLzn77lU0PPir/guzoaknsw5/L2YCrNv06eW  
iP5vSpZ+/10WCiXito3HBNkQW4l19p/bqYAVH1hM87Ch8+R0vH/qUuGOx8fv  
k+xsijG3HN4+SAUr6Z4uc2Y2VKQk73//SSpUS51fFaBlQ6wm2Plzvalwm068

zPYIG7rsbvnA50UqACFydfUPDnHELbzTGU8FgqoVydIvHCo9H/WXcyoVPN9V  
/zX8hkPljy8ZjyynwrujuZ0ekzgmCYWVr2RCIT7f1w7RnGo4svDYsJuKryY  
/liv2Y9Dd1knZ1Wp04C7mlycnNj/UtJBR5iY00B1o1cjr6H6vH7UiucafAH  
tzmcXEnsN4fzJ58JpsExvbc2LNdxqCmUL/aGZBpU37un63yZ+D6cbixLUEgD  
zsyH9MEXcKilDD21Vk8Di1/KUq7ncEi1eeyzLD4NmFR8qQ304FD7gCctpXEa  
iEWdEz6ehUNasz8VFk6mAQHVMcQR34euX1n2HQ5p4KuEL4jJJPYXLVvKZfc0  
aHtM8UDhLA71CN2tCPdPAyfvB6/NCon3X11twCQ8Dci7ti39b+DQc4vBbyLx  
aVBkm0cQfYBDRr50LAdpafD8kVCP6DA0vUheUXt/Jg0SY8KDqNdw6MTFZLcH  
BWkQyin1PpqN+P+socs6f4WIFcl8yQ2J/YOV1/jdSAOTEw+C3dPZ0MQb+f/w  
d9Pdze6KoUgvG7L7hm1yN6bByDNPq58M7OgdqRXXVlsaMGu//Bzqx46cuD7q  
jHYR4137cEptiB1NH432qX2eBpf9jDl+qHEgd8Mj57JGiPGoPg/UaOFAC66X  
m9zepEHXEkVzqxYn8o4Wf6M2Q/RP22tENs6JPuc+2mP+nAYzcvU5/XFcyP+W  
seC3b2lgNRP3301pbrT8cNKg/1caBFZPRit850bBI0HBt/6kwQZXzgRXLw/6  
vrhfmHQkHSZ7jxn/vcuLlvfOP7SIS4c3R8tkU8r50CYT/7Q8Lh1yv/t9ULvL  
j7aP4yUWRdKh+SoD2eoPQZR0+8q8SyYd3MakuIrLhNB+kFdUiXI6BF5dNi0y  
FEb/Sk53memlQ09RfctmtwhRX7Atiplmw7yll8Funigif36X6p910pD9EKi+  
7SOGqH802rR6pQNa4SwU0ZRAeVTOiQVB6SA2QRV1XU0S0Qus3giItp7FDC5  
D1KlxZx+hTczHT5eWFi7nyaDLnvdYNzOTQdV5qat6mZZxJF4VPVVUTq01tqp  
D/6UQzx3rTKyK9JBR7tEZOCWAljsjv/X5M06f6fa9iSFZFRZ+m09P10CLn1  
sndXRglFjy+oj3Wnw6tcVS/X28ro5UHkBvd00pj8l5os8PkYWqC+cjN0MR2k  
ZVIdEwfV0DbuyYmnK+nwuv9YSI6LOhKRla3z3U2HT76z4SblmkjjmLhj+790  
cGTn/lGdr4VOgikFLVUGGJwTTHwTpY18zcNa3RgzgNPC8bqu8XGU7HDR6z57  
Buh8l1h1p9ZBRV4Pmcj4M0B4e+t3ebMOqg6d6rYTywClLUmrUG2EuhIOQmpk

M+BDjESeThVCE1nCPPvKGZBL6ngscwmh5QLDoRNaGVAnLfSp5oA4HpcGxd/S  
JeLEZTGRLwixVRWibZpkwFYyR75nKUIy9x9MGFhlwG4Xc/1rVuLz3vGWcNUx  
A0SGdZjXLHWQQ//e0VX3DIg3Fm30sDiOQl/xzx73z4A9BRuSNX5tlDWte74w  
LANigt5JZL/QRKVLfpqLsRnAn/lx74YtUZ/8PPdVNTUDpMjv2tx/qoamqSb0  
P+QRzxN49wvNVdAm6/ZPuWKivytKf8yilRC1AE9FRlkGZF7K/6+ORQGpqr/  
FavNgLkin+fOEpLIDH+2PuF+Brxyfm/yH68o8jSrd3r5KAPulNW95+EWQPme  
m20R/RlwIfiz67l10IQZwuHTN5IB1NnVzk7auzqP47VY2N9kQEVfDzeX1ofu  
0Uz3pwHTRPxyHrKoyLDP+VlhHYsZ4K9WH2i5yoTtX63mZVjNgJtzF2RjXTkw  
5jsvX3j8zAAHT89YQx4+TKJpPaFINwMKA8+iG3lC2E03mktkJARYaP7GvXdV  
BJP25l29d4QAmbczn1FlimFtAfK69lQEE DMR1FIsLY7hw/Clh7QEQLP9pylu  
imMvo61/1DASQMi5/XillThmn+hjZM1KgLk5jwF7JzFsIS3uxj47AaYpP0Yd  
XhPBQk7nbN3hJgCZTGJ8o7MQtp1bZm7BT4DPDpqNpBP8W0aFe5XbQgSYeRH7  
U+IpH0Z/uXvvlhgBumaYVL9Y8WNXy8asTKUIoPo04YfDKUFM5NbHmk1ZAmS/  
orc0PyWMNVb90ryuQIB9J6VTHrdEMY16CgdDFaI9Zs/5LQ8J7Nl9zsZ1NQJQ  
FI2xcudJYycfSpOXahHAK/yR6hS1POakt1ZbhAhArlp070SBIuY11mRxTo8A  
Be4fLHWblLHYFZWryWYELr4tfkXmTqWHR+tHXOSAGJ6xvw7vJpYzpEnCyE2  
BBCN+Z1yjVMbKypKoePrQACVpJ4qvwJx7Bo/kjnlQuSvLj7iRCbCqupJxuzd  
CWDruNRa8QaPNao/iznpTeTj27pYUTBgj56f4TL2J8Dg0yvk7R2A9VibdOOD  
CXBtfNSX4w1gL+dovTXCCZBrnvng333AXof8R6kUTYBdx8sOz40Bm9ktvCcd  
TwA/vbmMEGk8tnTGxkokmQDBIT9bzIR0sA1W9t886cT6+x7IHV/VwvZuvS/D  
ZRHrkyD1QO+TOkYmfW3RnyVAcaJWIEn9MYy+w+0TeR4BUk00/2r1qWAcxoK5  
BwUEeDwgw/IYXBkTfPNRbvsAdYn2Hx0RhUxKa+q8fUrBOAo3ccjhyhyuv+  
8V/LCJAu8iZkvV4e054izbtwgwD+5H3C4ZZymCH12tPJ2wR48nfsnOwJWezk

lSbf8bsEmHhBs/vgsgzmJBJF87KOAG4yKT35fDKY932Vpr5GAujNKqgbv5fG  
Qo5v23Q+IIDObZXm0MfSWOyLxzutDwmwo1qckdsqjaU7pJQ3PCGAkqPjnniX  
Njb7SUF3bjcB7g5ciHrVL41djCRZutFLAFo9g+O459LYtYO+vJJ+Aojnm5M  
qpfGqvLOKBS+IMBNRyfuwlBprInT5E3OfwSQjxh9PXcghbVX0SYRxgmAFfxU  
3LKWwnqU/uNPekvsx6j/sl3cJLGXWGFf1BQB4EOY6A1mCeyNuU1A8CwBUS7M  
eRp7i2Gzk2z0Ph+J8SrLXvxsIIIt+b1vdv1CgAtbCl+HawWxjc0ye7sVAigO  
vdco6OfBOCSrItX2iPU7ysPXsHvYLdTmX6BwQABmruka5faVbmlaWUp0kwwg  
idXEpr9P6Bx3bUrhpsmELo/DkfQjR5DRcqQQK0MmaAxOhV55QYss41T6aVky  
4cJlonFFVhbkXfiY8S9XJlZgnnm73M6JQvISWrf4MoGG/FicVDUPiqvTcfou  
lAleHBIInbprxo3Q1koMvYpmAmxk8plshiHKf9d2ek8oEucgySvJxIVRsdco  
vVwmVL17+i72rjAqnzX+NqaYCaP+nxLXzURQdTbt0ZBqJlD7F7msYSL0/s6I  
aq9GJlRz266sHIogsn+T/PHHM+HFNdLlDBpR5ED5hVIWMSehh7Qub1GEOkX9  
/DGvnwmKTCm0hzki6C/bweRl40yoHyUwjO4Ilys+mj5T80yYWuSVlfcQRndE  
2e8dnsyEZzfC0yVXhdC2jPDIVptMyAgu+blyRQiZKcunBTpkgm5bc/htDyF0  
U1PTn98IE3yXPswngwihn2BoOXEqEyRCIRXu6AohAxNryRyvTMCa3xgZ2wmh  
UstTwsf9MiFjCj75cpIQWnMIov0ZmAmXRSMSHjUJlBx73K+7oZlwXKrSd3qD  
yI9f5oxLZCb0lF7pU9ARRkuhBf1MsZmQsOCfslAkjLRiy5qeJxDrEaySxLMi  
jApS7l5NSiHyW8lVTasvghayHhCO/q+CKw+H8u3CEiG7d+xLWUOSLUk8HWsS  
kiQlklBJQpliMWaGGWOMsRUS/WRJKS1CtkJZlqlUQkLkKq2SJH3P9+d9ve/7  
nHPus93PZbmI450znOzPVkFGjNrijw+RY8H52bdPjGRUUn9LqcokWCz6J5MBP  
SBX1Xnqz1ZGB+b4xc/5EnCrSzfukxs2KhXzW6p3MR6ootuib8MOUWNhd801p  
8Iggel32e/5EeiwEuD18Z/NHFWIW8A6uvRwL2mLUAJO/qiiyVrz1TU4svDIL  
8z/zRRV1NineZeRhf7Zfq9B6qIpUnmtlbyulhZ5sHRvycVV05tUmyo8izH+B

3lLpHxXU0mtxsqQU2+9ob34VoIIUhhzdVg7Hgpzlw4VLNcooeGz/NuJeLAjt  
Dn9cLKIMGmf8NFsqcPz+l7++PbAWBfy7sKhfFwu9ChGjjQuKqG4VY3j0cSx4  
3S5y2p6ngMRFMp5nN8fCbQ2uigJHeVSpUjBL24H5zmI2JdTLICG16vjqrlio  
Xzkr1E+TRofWPw0+9ToWfmt9zCjcl4XuGnTvV3sXC4ZW0wYOWyTRKtMBy/cf  
YsGaWIVutl6E9luMr2d9jIUBjZ7hp2oEumk3T7IajoUuz/7Lxw0lEjcz9/Kv  
0Vj4e+hoQZyrONqzT+TLzXGMjwi9jqSLoUIvua7DU7Hgvq11LqRIFC36aVRJ  
zeH+5Yi1WR0XQY4nDa61/8Tx6ax5YeohjPLCUGLM71h4HKn+n1qMEPoRaR+2  
6W8stl/v+dLZK4i2x7l5jnORgTnaa8YXJliyGD62V3nIsPrDuHW2mSCaSgna  
6MpPBobR/Tz3HYLI8vJ5GQEhMngdOjorlCml0vNoK+pEycB5ZvSOqimEvhZx  
xkMJMkTF8KZdmxdCZrdzX62TjsP91QtaKyOFEbviRk2fHBkspQu/3EgWRsO1  
FddTlMhArnyd57RVGBk3P2HZqpDhKdcOrf8oQojxvPPsH3UycHG3uHqGCqKD  
Holl/7TIEPixgpk4JoB0x7d/XqlLhm5rz3+pvPyI6xyPAr8BGaKdwieWO3lR  
N99jFyFjMtyVqU12dVqJcJlu0MVMYVBdP6mtyORC4eqmDSREhpr6mF+Plf+Y  
y1nd26BoS4aR2X8jkzaT5pMvT/kq25NBkykuL/69z7zOWydb3Qn709xFQn4U  
c5/o6/y6bmRw58n/F5kwWWsk7LPN4AAZ0GmrivWRP2tX5SiFG3vh+G/VSF7N  
XqotqcocRv5koCf9CAzQ5q07b+cqZxWA/Z16q/zlj7/O4a3Y7u1B2P5Klzu3  
TgvWKfl3x08MJUPxnaL3VTtF6mZ+0Ot2hZPBbJJ1uzRUr05JnO3PPedX/m4v  
cf3LFq9Lk1ip4x5NhjVp9Y85VyTq/PPrfQ6SydAleL5b5TRRZ6IXddmbhu0l  
dBInZEh1q+tNunwZZFgVdch/HZ1U1+f4c9Vxfs6P+4sbxGNSXVlfuljDhnE  
kxseTzwi1cWcCAoLySCDM+dN4okzpDqXRe3SM1lk6H11Z8xpjKhTo3/5dC6X  
DEnNPx7tJoi6eekCmehrZLB9bzW8cVq8rqXQexe5kAx4hcH1CLG6rE2KNNNoN  
MoQflDv6wU24LrDpfQ2jjAxHci9tZawSqEN7Mr6z7pLBZZQnY35hZZ3Yklt2  
agX0x61wrbCav7VDwaKHM6vx94X2jijwR+39f+2Z2XVkuHndKdZu+kstjZXQ



efUJGUwMqu4u7nlZu0/RhrfgKRkG4+bXd2o3mWveXGFW3EaGvrdR72UsP5kv  
mtaF3uwkQ8T7/m2xopPmz1vPl9zpxvl+OPVAsXHOPNd98+D9HjIE6+XwtvfN  
mwd/+S5V1Yvrp+7N51Nei+aW4XccawfI8N+zc7fu7f5rTuI9SXk8RIbXd/zv  
mTf8Mx9N1XrUPEqGlcHmRb3vuVClyuhs6zgzZni2jQ9mrUCM8muanVNkyN3T  
uotXkxsdhEOHuufI4EYtiZWncSPdF/IZPfNkOK/eu/5XFTfi8nr3vHeRDEP+  
bb9PtHCj7sm0lR+XyRAQNZbhWMGNCij3mw5zx8HkpcKyUwncKHylSMiXVXFg  
Ox08ed2KG9ldbuaWB0Hu+4+ /NM4uQLJacYPTIvEwRBpPP5KwgpUZ8PlsCAV  
BxKUzqaXpVyI/bqGvCQXB/7zXs9fmXEhnyPnqrjWxIFn0ca/9UX/zl3mNs3w  
qMYB60qXcNrEsjlv7JyGwLo4MN50Ubndadl8YFju+qJ2HFySAtajvr/mFbZW  
qp06caDB70D1yv5rzio5kd9vEAcD59fueZP619xfKG3NC2PszzN9C+sXf83R  
qZorDaZx4Oi+mNXhtmwu1T0ifxfFgYX46fvphv/Mp4yEs/6zjIPpE21enpu5  
0NPMTTLptnFwzU5H5C7/CpS76JlBs48DuxQP+n4JzIcnjRThFAehla83fXZf  
iZwayjjHXeLAZfpU6rNBHqSh+lbMwy00vqZ+WTGYsAotU/+xHA7EwSO7JbXP  
hvyo5+s6YeQVB0gy0q1+UADRYiElP3jYC0xsTMNzzMv8fx4iYA48NkT3njo  
iwgyDmvl5QmKA87IrnfOdmJodlsc95czcRBUFaOVPIG06nlsY96di40+3rH+  
tVUSKONfwHLrhTiYUq+JMYkjkG3zo8WbVMzPdmObvtWSSElzJCKXHge6GqUN  
zs8k0TxD6FdyUhzwmKsOKEdLoUJnz++h6XGwQfXh3RvvpFH0PWqI7+U4mP19  
tdE+Uga5SZVN770SB8oyGtoyUrJoVd/yhMn1OCjdUlaqaCCHBtC6A02SODhr  
fXyt3F05VJG/66v8rThlu+6Xq6Ej1g8Ef7C5XFQPXjR5XqqPPI/mjeyfD80  
rp/LPb76hzxCbS0+M5VxIPyjSKzNTgFJbZgd/FQTBzdekcPcUxTQVLLsoVcN  
uD5yJJ9odSigp3MW/U1NcXDipa3G3T8KKHdvgEdFSxxw/1rq8FNQROGVnPdf  
z+PgHltpfJXETnJP9p3uSsOtqhwstcYKCKN6OE3jNdxsHMjkhfRUETLg4Ku  
Ue+wP1sFOAsCiqjHyqj7ZF8cLLe919nTr4DKCg86HxqMA7HDGTKcqwqIjKDt

dB7B8cWqk7WcFZBX4C0Hy69xYH3nZEBsIDwyfvGmzXAYDt4F7yUbnJdHIgbl  
duozcbB6e2Moc040jaZpPJP6EQftLkGpfh5yqO6Xkw3/An7OP3+Y0SmLMg6c  
bfz9Jw7e3hue7dgli4Jqr1pM/IuDOf2ezUkDMsh2bUt930oK+Dirqauf10FK  
cTPmnXwUaJwVuzOnLIPmP8vU1AtS4M94RrvLG2nUaWdhWi5Kgf2kuBPXUqVR  
YenxymSEBfRtr8WhgzjflhzjNGkKvHJ/zEfRIUZuIdX3qfIUSFW7NfFCQBrp  
vh4yOLuGAo9jDVQvfpNCfJsFy4+pUqDUTuna1DsppEm6cFpqHQV2GP+9pfNc  
CtnPTm1q0qbAmlUGh6WbpVBgp/dCiC4F3qhYHNBulEKs0u7qNQYUEP1VtvkT  
fn4nwfpCxyYKnPr2L/Mh/r7br2Jb5BYKZAVXymq9IUI/LDW5tcwpYDBx0KN8  
RApJrc1q6gEK9D8L+dP+QwqZ/BWmp1hTwCwk8tKPVdLoQO+FHQZ2FPixe7mr  
UE4a5aYd7kzahfk4EsvKsJZGDSGv2Fv3UIATwHBu3y+NhpXS9oy5YX/2KGLG  
BEkjHp2HkpkHKCCd8PieDFkaaQhovbP2ooBj2EKKZpo0shvNypo7TIE9502H  
VQukUUCjkGeeHwVeKbg2UMqlETMveo3TcQocKdvm2PJIGpVdmPn0J5AC9/Jn  
C48/kUZdB3wKSoJx/g53nBhpkkZzm1/77wujAMl9n+l9/JwkaavFG0GBkzNE  
uSv+3nju4cTdsAQIpcCHWZRJI/cXWmXeFymQd8dYfD5LGp2/mR0sEofzc+v6  
5qkYaZRDFzasoWH/f7nHXD8kjer8L/48zqCAza/X9ExjaTRoNftQmkWBaZnc  
uW280ohb+cj55hQKvn+b7Jdrl0Jqy6/NTqdT4NDVRUPLRClk88H239rLFLhr  
VWL9n70U8q+sfNyZQwG3AC6uUwJSKCFdmxKVRwHfKJ7uTjxfnu8SEXhXRIFs  
PvWAGStj5Nr0RiK5ggI8W622WiESCs/f/sasmgL86ELU5mUCXYquyhyvxfVx  
Jt5IsJ5AfSZXFGybKRChqVQ1b0Ug31u+Gn9fUSBQrmvE75AEojF6vt54S4F9  
1ny3+rUIUPFRu1L3DxQ40KnvELMgjtqsq0+u+kiBgkhX3bMt4mhSWUfv/hCu  
f4/T9RNZ4kjk35W5w6MUuP6Dc4IvWBzp9Yk+EB2nQPmdh7nft4sjl6rYs7Xf  
KFCy8LnpvYo4Csv4vuXELAUebFKxH+YSRxmN/ZZkflKA62Vw1pYhMVTp/Lbu  
6QLOr2GP8qpnYqh3w47YsCUKLDx1cwi9LYaWVj+yUuGiwu/v89SibDGk9FVn

VddKKgyqPjJ9kSiGoDm35QIfd7WF/VlXlghn2tiiesFqcCn/7g500IMxV0k  
074XoUL2oGBY6hkxpDZS4NkjQQWRhLOLkWfFUJPds5OvpKhgEl8x/C9aDPM1  
dqFLjgoMesLiHqYY4pEQYnUoUeGM6S2BW1fFUEG4bm6bChWO24x82FYlhvPr  
XPZMA/uz99tWi/d432w7XdekTQUb6YQfn/+JIVpBeudjXSr8NQrr8tkgjvuh  
cqDOgAoaq2w2/NR4WR8909k49MqbC1i22sskZ4uhY99JypSkVVJWT/hzA/PNv  
XiNagagguu/7WvNf4qg422LNPUsqOObj6Su1UlUA7uHw33rGlgrpI+7EsBwnE  
aC3edcOJCrS1mu57MiWQtm77oSIXKnD4f4p8rZRA7ZxvpwrcqGDq7OdGeieB  
An+JxuQfoELVlt9H335IIKGDBuxcLyrsONTfRhff96cG17xsHyrov30kvryO  
QI7qZ+9c8sfvi04oeCMCTdEvN6QHUEH+sNu5ZhcCsaYedXGCqPh+PXbPyo9A  
unsGBpNDqRBwm7V/5gyBXjzkmmWGU+HTQYNfgxQCBSuormCcp4IxpV52PYdA  
YrE24vHRVCi6oOw0coVAdz4fVaaQqXAU30pZpZhAzvYM/VgaFb5tF1+7eIdA  
M2U3LaIZVLBUpfM2tpJAKcSL3ZEsKjRcOPi6s45ABhGzhyM4VMirvfPffCOB  
uvuI0DMZmN9Pnt0iLQQKtTAmh2ZRgQW7vum0E0ii0J1zKpcKa42CY/07CLTn  
1JW7xwupUGcyZUd+QaA0k6Hu12VU4C03YItgbHSFZ9j7LhW0Hwg2kToj9GbF  
uu+eFVRY8rpU9/A5gcL9d6z0qKZCzaomIWF8vIT7CcK9jgo3ec5v1W4lUMVG  
lureJ1QQKr/+Vu0Zgfa3TF0eUoFBV+DIImAi0sdFvtaqOCUrggkx/7f8nz  
5x6HTiq4bl0oU3hMIJMn0r47uqmwL02c4ov7/72GaZhtDxUOunM4P2sJdD7x  
IMWqlwrl7p10n2sIJDCtNqYDvDzvp112YFztml9gPksFbYuD6zdj7FHVeN90  
lAqHB1+//YvxkuJo0+ZxKlxe5RAfgu3lkPnfGE3h+HWHagzaCGT2Rfuz/hwV  
3JyOpyz3EKH/p+NP3XkqWB66p8j5QqDo06d4dRapEOrOOX/jD4GUJDMswsu4  
PvTfNfAQJFR37r66BjcNDgy5CXhtICGvgZ5NqqtocNpnMPC0PQldLZJ3UxSh  
4frx+Po0kYQYtPgbPeI0WL0HRUjclqEwv+/LyZI0WGHQ0977goTsVNuLuBVp  
8NH4czG/rCSayz3/+8t6GggH9fcN3ZNEfRdGHfM30mD7stLbtR8k0dODLtcO

GNLgwwdjKprcUihbTntnhykNHuTXsiqdpBDtd/pVGqKBgrrC00vTUij43Yof  
2yxpYHlN+8ZgphSyznifc3cHDSqU/rVMfpBCumdsZk840iDwq4xJzB8pJOta  
bqO+mwYNwHDQksX70VAxa8CVBn1CFzjlRtJoSpw+lelOgyl9+YwhR2n0buaH  
5e6DNNBPZw1TfaXRkxfemau9afBOfgWfX4Q0uln2fKLxCA2kSnOYO+jSKDPJ  
BC4cpYGKZiLX3wxpRA4sSDM+QYP1EfNTdvnSKHCn2Nh0EA00x/CPzBdhfaId  
ZV4SSoO/6hMnum5IIXD4muITju05tUhcLZFG2l/3jMqfp4HeQKuvDt7Pks/q  
Td9cwOc9kp2ywPuSq3B9MiuWBm5tn0xLEqXROCVzeDuVBuMzO9+ux/69PrLS  
ZAUD+0ci70rF+7Pe8hSzmkkDPtmyjSUW0uiG8ofB02wa/Bj5vXKzkjRK49q+  
aUMaDRQ9k91X/ZRC0R/v0kczafBS9OaFYaxvjtUpDVzNpkFC3eWZ9HQpZB41  
T5P4jwbWd69/PmWO9ZOHZ4f2Qho0jlvOnJSUQhKmnRupN2ggmHXZe9WMJFqS  
MaWgMhp0bhk7r9YhiUZ/XX/3q5wGLVYhcfduSqKuHvEN5Q9wvVVD6nJzkujR  
gwuxAVU0sL+gGfwyVBIVpo29Ua2lwc68nj7j/ZKIfXqvdn8DDSJJj+yqLSTR  
eZfH0RINNEjeI7lgqyOJfPU3vNrVQgOrt2obW2QkkZPY5XUCz2mwR1bLQItP  
Em2Z5ol68oIGZ1MP2+z9RUJqncFdka9oEFIVfGvzGAmJ3OpT2/SWBlzSJ289  
6iOhhUS7c109NPhA1D0evyShoYD7HUUDuJ42WtH3tpDQ8x1rVQ4P4f4YMflm  
0UBCDzWZ4XKjNEgt/bgYVUVC1/gW2l6N0WBpOXx+9h4JMUEPrEn6RoND7kiN  
eRvrieYXp21naXBO/0yL8U0S8i7Y2vLvBw14eTzW9ZeQkH1ckULVAra3YyM1  
oJiENvkQIaFLNPCL0tdoKyIhDckJIVmueGiJq179GWOpIifF9SvjgXyogHUN  
v78qMsvany8enMyfak7j8+Y3hA4KCcbDqP2vXQ9LSWh0cEfUPZF4WFUHEvkF  
9/PbVGWZAxLxcPTm8NrAOyTUYvv7HpdUPDR5OFbqY/8rf3ftKpKNh7ezKpVq  
FSRUfLN4wlExHg7kbM3Ux/FePhQT/2NtPKymBz23rsHzQsJdNVstHq5+5nTa  
15PQ+eaN9Raa8fD640WS3hMSCoJg8/i6Ph6OXBeS/NREQh7rP86zNsYDv6/Y  
dvtNJ0QwUMHZZBgPF3b4KLu3kpBZCku3zzgeluPey/1qIyHFX+b+WigeVtxM

s816TkLLB79dCbeJh8Cdf2Iy20loSrR5i+IO7E9vi9AX/P3HJzlvGh3iAYW6  
Gqvi87v0hIUEOMdDznPr00zsT40mg7C4azz8tlkVWYf9v/NBteThvngwytmw  
QfA+CeWz/lh7ecSDVdLjr7tvkBDH4tUgz6F4EH3rq0C6SkLkHzeiSn3iIWHz  
5usBHBIKLSLLuPjHQ0Yg/6EgCgkdOXDg/sLxeFA2Wli3OUNC1g0CkzYh8RAU  
2rszdg8JGZ3+FD8ZhuP3EzpiYEFc6hpVqqkR8dDxafqXkC70J/OYx+DFeMgN  
OSB4jRfnZ9+ztvOseBC+Uzi58jaBKldf9VfmxMN8lSNv1SUCldSGc7ekx8Nx  
86YoLzKBGKoappJX4qG8uGyhyf+Bdk5Tsm6XxgO157DJUS68T64dtHG7HQ9l  
oSc99k1KIj29Rp+W7sZD61n/umWsVxT4hS78VxEPdf8Fm4c/xXrl0bCMfXU8  
nLt/+37PfQm0dPLR/ZnaeBg5up1rS4EE+rY21TnzcTx8jfRYepAmgQZeBUya  
N8dDeJko1Z8mgTpplgkjLfeQVRsffuScBKrbIqeW+Dwehv2/3Gw+KYFuT87W  
63fFQ+oxF57CIxlo72qrx7tX+P2YSXdFDwnEdsn/Ff02HpiB72nWrhlohvdc  
qvqHeCgdNsw2iWBQiqdNz4fwPVbafqRF+sznxOa7aFD8fA0bf7xS3sJ5KLE  
dVR2FOffLG3qzk4J9Ng9wVl0PB72RZg+lchf66WKmfJ0xcOzd9+HdfdKoKsd  
l1T/zMbdj2EbXsJLAonwKwvP/sTxrqn4MnJcAl2wLJkf/R0PVyTa7JoiJNBk  
IP5g3994WFBYndfCkEBtsxb3WngTwHpU3ZxRJoG26LTl1AkkG07sYeVLdfg+  
409Cuy+cAHk11wuiOiSQdH7vqRviCdDH621o+QHfHz747M+TTAA1xr8t379I  
oJ+SE5YZsgnwaNV3tazvEsjX+bQOUzEBPpuUeFssS6Buxh9JsnICDPWz93/n  
I5BFc9y/s+oJ8PuuTFS1GNZ3/wTHTmolwlkzt43yZbA+ME3rPrIhAc4NNU6X  
ryFQUphCzX79BDj+sEn2lZrWI2UF13dtSoAL5WvXRK4n0IkxnWSbLQnwK8k2  
0E6PQL2qDyK2mieA30rrJ48bEWiHl7mPvkUCaA7fSP66Gdfnpead62wSwL/n  
KeoyJdC6V46bFHckgGT+0S/a5gTKE05RIhwTIIjr6Sf3NgLx2nnxC+xOg07y  
uR4fIFAYeXR22TUBjoZWz7taEMjl13zT+MEE2CEVUSBrSSC9QL5LPb4JYNxz  
w6cAP79amBz7/FgCvP3NIy2Cscgn6RNPAjH/OS1pdvi8C/J5rpXBCVB33tf0

C9ub3KuJysISgO6yPXc/1tce7DvrCiIS4OvgR24b7F9bm4l4VIQCKA7nDGmb  
EWgL7+PF5BjMn9S3EsmtBCretmOESsHxmGxrFsXxSZ9/2RGZkACHeLnzVbcQ  
iHZ//8MQZglwthaUeJgQ6OfUp7yj7ATozUzb+QTz46sVwPBMS4CUtxbfD2Ns  
mXvec0dOAljMJ/GGY7yWSNTbVJAAd2OXrSbw98m0hNz64gTYv+09jzW2txyf  
vVL5Js7vEQEJSezfySeq36TuJMBR1t/aozievqXSHqH7CfCpQ50cg/nYudmo  
gbsyAdS3VPtk22A9GlJTsvAoAeydzdeU2BNI66Z16lR9AvScNvPjcsb6d/R5  
1EhJajjx2PQc2kcgPuW9/r3PEsDEZ0R93AvrbY/+XV3tOP9TRX+0jhLlteub  
Ss2rBPgg/nKYeY5AjavDhe6+TYCnAbt3psTh+4HN8s+iDwlQf3r9sDCLQKL  
Iq2pwwkwI63iZFBAoJagwXmbLwlgVjet86OMQDGqd9UWxhNgz9PPEuNVBJpj  
7o050JcADvUtL6CLQD2Hcjarr6DDWGNvha1/MT+kIL+3PHQwrPTIsuDH+rR1  
Wyqdnw78t7jWy2D9W2UwPPVNI443CKMuHk08r7/cV8gj6KB9NHZhhQEJaefQ  
7F2k6ZDiH1xzZSsJ5fBqF1Yo0eG8Tjm66EhCe6v/vDqmQofS14/Fbu7F+uFU  
xwp5DTqoTM5et/EkoWeqVzd2aNGhcnhtwjZfEop5F+x5cQMDrHV0LZICSGhL  
kmWivj4dco1/H1AJJqE5C1LVsBEDrpw+fGgujIRuzH8eTTehg6yr7buZCLw/  
Sh+S7MzoMGEXv0s8ioQUvOmWi9twvE9W7toeTUKvSR7BN63wc4Nsb9pFEkpp  
1cn12k6HFoENIk8wto1ebhfbSYcDIzc+fcPv/zPo+v3EiQ7ht2t9/+LzKr/k  
rzvjQocfhyKVR86RUEjO6b3r30hwy7Q8Px3vK+3dNnHv99Mh4g46xYv9HeaV  
Lk/0pMN6g5WkdccxP9VfB8wP0yFPb0B2yhvzc6paaMaXDjffXRnP2Yf5UWOa  
XjuG/Xm4t+GnE+bnnecx10A6cNu/N9u6HfOTtDFjVTAdSuyqPPyAhEwsVzRV  
nqaD2EmaTKApCc3Od88GnKUDOfhl0PZNMJ/SgjWkKXRwEVp/YFqPhHy8wx1f  
RNPh5W/VHg98n5GXtIuMjdNh55zDAEUb89MqW2JIo4PEbeMgH5zvpOijns90  
OpwdC4md1MD8GNbyXErC/h1IJuQx/veFZWCFqge3mjVrR9UxPzne3ktpdAh5  
du+aDX4estuAVXajDsc39WXor8P8rOKp8c6hQ1K91ki+Pn+4+s2YRB4ddNds

eMLC9nNOFUk3/0eHbOGzM9M6mB+1czZni+igbn0punYj5ue9/WmtUjrIRSkf  
m8b19zRJIf9DGR3ag/4rvmBMQhctpzqT7tlh4U3ZVm/Mh8mv+qVtFXTIP/5a  
IRmR0ExpivZcFR38Rgq2c1thPiQ30dwe08HgNP1YugOO72uk+ZouOmSYbvJg  
HSahaLXlyrWv6XCqJZ8UdpSEHnjHGKm8w/7Syoc9T2J9/J6yXn2QDnETvVMk  
XA8eknxFGiN0WNfA87gD1w9nN11F8yvmW2nu9WGsb1a0Jcmun6GDx+vNU3Ms  
7N8qsXSdH3TY4Z5H/5BKQsGWHDHdBTP4Nkxywi+RUFEOiblxIQ5KqupvqnJI  
aKA6g0+fiwGSmbvls/Ownv0lE2fAw4A2g/N6YgUk5GiYvWzIz4BGoaKPIIjv  
Uk4pnt8kxAD61sHvTKxva0qv/jQWY8D1NxtMYrC+Xa9WMLIFhgGL1zUuXMH6  
NiuneNhsLQP+6XevksT45TvtQ0iNAZXG/9ZW4ff5JW/1btNkwM8NIRvS8Xmw  
e60bhQ4DzHX1fuUWktDZpPKXlnoMkHWy3vH8GgmVtRo6WhsxQLzgwZREltbT  
vBUtNiYMuGHLvHsMx6doaWK93YwBpxy6DjWmkJBrdHW9HTDgazv9sQwD3weq  
zbbaWzPg8oeGa16xJNQ4X1ex044BipwLnYyzJLRoYGHg6MCATt4W0dRAEjI4  
1XjLyZkBno7F+idxfwWU2mg5uzLgY/uWg2pYP+Z/eVaw250Bfjd3SjywISEx  
7+fZrt4MKH5WXeK4noS+Ob+hHwjGz+vaFDMXCKSWtI/3YBgDXtRvyfWbJNDB  
1vcxnhEMkLBQ4w8YxPvOYuCsdwwDRmfeyyu24v1m8MXPn82AC47tvUevEOhj  
0PFPR9MYMM+R3aacSiCp0omDxy8xlO1BfaoyNUBU1Zk9gXkMEHocm/LvDIFq  
DoW+OFnAANfHrIGfAgnOI/uH/aliBnA6vvVK+BLlh/TbIvQOA56bDIYH7iFQ  
lnNk7en7DNC7Pfpz0k4CvWT+NTITyQBv702BitYEA15uvYgGBvzKb31sbEyq  
sxaU0nNNDGjZ0TX0YiOByi6sWhfZwoAtHueiW7UIpDi/Wim6C9fT2NqSUSUC  
HVj1ezDwNQNOdufqsnh/Sb15T+Pdww4172x76kkgd5ovPG372PA7oc+D7rE  
CSSxuVFryyAD3DhPa61ECOS8vXxy3QgDxo+MLygLYr207+ptqa8MCNbxDDjJ  
j/k7mhTKO8kAu8lbpqrCMQfEbnpxzQD3vx3YnkPD4FsE44vDH1nQMQedc3v  
3ASKu7Tv0ctfmL8/xzP4MG4otolu+MOAxJwWh9QVeL9XGlrC/seAOuMup0sY

m7Uq8+SuTITkNtE8Gfz+ufeiz5h8ifh+KWUttZJAFWN/6ZGCicAZDEWp2N6P  
3xMOAaKJQD9yn5OC/TFY3Su6n0iE65+OWxMCBDol19K9XTor7DxU9skJEim  
dkW6sXwivO4K7CwWJdC4aYG7+ppEuGX57IYDQSDNnRx5kmoiGJR/XziC9aOf  
R8wA97pEaFZwupemSKBrJ4LyZ7UToZUaPuiqSqDByIO+g7qJkD/5J64Q500J  
ab/uhUEilO0+mZ+I9aNHjSl4rXEi7Hqw32wV1jc9NaTgbJQIA+c+LjTaEYjU  
wW3IsMTxfshQFnQh007+mZ8RtonQI3ku1cODQM//Po90c8Lnmb6pmjtBoNUi  
j5CNSyKci3jnbNwaQNuVSIYYuSWC/LuEqu9Yj1B0M5tUDiSCwxXzdQIxBHqC  
qPHiXonQIOj0LYFKIK5dp+25fBjh/VHxfREMApkfOiw87ZcIf8HbvdhvXL+  
1K6u/uOJ8PC7sNUjDta3F81Tn59MBMubPz1kMwg0n7ze7VFIIImR6f7NZwvcx  
wzxZ2RtnEuGYq4PD8WwCBd/h67t0LhEC249X++F+Kmv4mRt/IRHcBK58mM/F  
erRr+HB4bCL07Tb/o5yH9dinl2p+1EQo/5rv04mx/2z9lz30REgUVznikU+g  
ghVINyyTEkFRTNlyDOMh8ZyT+ikYa3Y7mGG8RoWhzY9EdCVO52V+PuDBhHf  
RS4ngvE9PmL6Ku43S/+KvzmJUHL128E23/n4npuMi8RzndFieVi/ySPWJp9  
KEgEvUM7vJVzsP4+rfevtTgRWFcmrp70IhA7TulJ5c1E2PGiWi4Lx9uZKkQt  
upMIJBMRhSzMh2DB4vaM+4lQJG8+HZGG9XBTT8fpmkSYPsww+ZpMoEje5Pe6  
zxOhwyUoTZlGIG7208H3LxLBxOt4VA/Wiwy55S+UV4ng/M5SLDUW9+vGk/O9  
vYlwb/JmgNEFrI+rC/5SBxJBIqS9RTmSQEXWfTz6Q9gfk5EVmjfui8Iob7P  
iXB4c93hnWdx+fzScSPJYLvkbVGBDyf0AhZzuBbIniWv2xaxPXSHFSt3D+T  
CPukLh9KDiWQw+9ZzYQfiXAw3tzZYRAR+009AwXEiH8N3VoezDm+9IIRP+X  
CMQDJfm+IALN3ujz/LiKCTGzWUeDMI4w2ebKWM2E3KZ6Tj7GXI3hHptEmCC2  
z0BD+RSB4h3LfAbFmTB4perkLMyi7z4ft5RkgjRL4YEUtpfhoxhiLMuExwoq  
dunYH8VvrhGfFjwBaWEhoTh/J9lXmSuZULamF7M7XAC6XA30TarMeGVEvN  
Hhz/feafpKF1TCi7qRjmE0WgrdKG6UnrmbDh9sLsx4u4/vMDckw2MsFTZC25



C/Ntr3Ptv2EDJuh9cNhkkoDnb8X7GyxjJmRfjp3vZxLI3UL87hZTbP92mQQn  
hUBH3WIaki2Y8CRZ9KISru+pwYfPTG2YoLix2/s7rq/wE9Odn+2Y8OPljYYX  
WN9TYrz6tzojobzjkellrO+v3TBb/OLFhGt00labnxBle1PYilQfjsg8ChKU  
eUag8vpSfuTPBHMy96W5djwfX8tJp51kwubnW5VZbwjUv7xgCFFMkORqHtP9  
iu9TdL2tExeZYPf9cNstvN8miWOWGXFMOHIp8YHMLIEWNd86TzIw3/9d6yz9  
TSDyPRH3TBYTJAaVWF34/iCAbA9ZcnA852wie1eQkMyeBycvXcb2Q26vyBQg  
obz+yTCrK0x4UxCrYytMQuuOqUVN5TGB9km++JUYCRlfSGVYFzPhpfLT+2Rp  
Eqrla0+ZLmWCyR/ft3lyJGTN4b6cdZsJLvSxkxmKJLSnKKRopoIJ2049ll2h  
SkLuVfuXxquZ0JxMDbm09adXu8Xuz3XYnqdCnzjWl779WoUfnzBBZMZDyxr  
y4Bp8T/vnzJB2FN0yxTry+AVi7tetzEh9NGG0lmsh8OJoYLOTib0KQdePib1  
ZpR62++WbiaMFZaeycH6mbz5rlNjD+bz8BPPRH0SYnmQF4OMIHo6rBMwXo0  
66LLtZujTPBT3XbrGMZ5Kaa/CseZsH2rZFQ/fr/wPxWH/Ckmqlo9k+fC+OaD  
1fnZc0zIrNQ+2IntlT+b+5k+zwSrnVLCtrokVPG+1569yISmgUPLvtjfmokn  
VxnLTKii9//TxPE8+XvjB4U7CR77+H1Kxvoaq6AdF1clQWRMR2imGgl1Kkfm  
nludBNTfE3HmyljfGx75flokCaJHMkYuYj57bXbaBUkkAa97ge9BWRla3Gd4  
5ZhUEjwMGH/VRcJ67bj8nI9cEmwy3Mb9QZSEjiNXbvdUSgKFloj6iNUktHD1  
1cxujSQIVkgeeLKM92/5IxsH7ST4ePjLEyNcLzxN/2XZ6iZBwl1KyJ/v+P76  
9bT1VuMksK3klosex/tq0ePyJtMkqGUpMjaNEkhOyHpqI0qC9fdm75gM4Xml  
pGOlbZkE1sY5O6gDBNLQ111Ss02CCk1TUdkPuH8tlyaV7JNAP/trzexbvK9d  
RyxknZLgaG6TsDCudxP/5xmESxKsspqoOdaN51fE/qlhtySou3yOyo3vw9aM  
HOA/kARwj6nyrgP3cw4lndsrCczyLHZ9wf3jXBY4vnQ4CXxCHjzd0EYgtwbX  
bb/8kvB85LUuach7odssbfZ4EoxzO5H34f7zGVEbmziZBLdGbpoZPyXQsXkh  
NBqSBPu/IV2rZgKd5P/JGTyTBFc3KEtENeH+dk4fbaUmQUSx+MMx3M85lzaZ

3ktPgm+v5Ba9G7Ger0EdKbqSBNd+b3hJgN+/P/gmKed6Eix/iLnmjM+rnqsd  
yihJgv/62/bNY9zAU7g55VYSxHlrmRZj++2a4Z+oD5KgdDL+7Drsr9yDovNm  
VTj/uyqfD2EcYPGe+F6TBP4DT3/lyf26+oCZrXdTEtyTCD6phOM/MHryo1QL  
zn/sSr5ejG+EXo3oaE8CgTJ/UspzzFcid6npqyQYep2kOY75G//Pr7+oNwke  
llZ8lntBIHpNi6jkUBIsuS3GkzDfmm/WW5LHkkD3D+/OFoxbvrHCpmeSoLGm  
M2DdS8zXqrnCgwtjYNSwWVUVY741e9+3/kuCRS21Ozfx+26ltNCYISy4lsct  
Yllx4eZKwc18LEhSOuv4ANubbxwr+LaaBXb8ywU8GNs6y6MCERb4PiE263bi  
/dDn8PaABAtOlRut18P+jh6LDhaXYgF6cEhKDMdj/PO2QIssC9IM+rVf4HxT  
Yz9di1ZkgWbX5GMy5ue1MGG2SZkFxlEbrWUwf2pZ1m8m1FgwfyE3JhPz3XS3  
iG+/DgvOfNogdgDnj7TtfZ6oHgtKVfzKrij7G87Z9telTQxacnXB5+rqeQCtH  
TgYabmVBu/vTrXL//3tgSaOXwvYsKKKcv8x7n0CcfL+AJkcWrPqcUPytHO/P  
DZkrI3ez4IWbztAu23ge2y5u+urOgvh7IsGMUgI9PtUQ9eQoC8YNt1f/vkYg  
MZ45w3MnWDC3giehD+sZb7Zqx8ZTLDA6ITLchPULVwntX044CxxdvzaXYn3i  
vKny0p7zLLg0ry52C+uTvMdj+qujWcB7LimwCusT6HXwPUtlgc6RisEfrOfY  
/tF/N9BZ4PHtc7Uu3m+Dc7czRpgsSM2R1zmD9cpFQaJ1dxoL+G+fcd+C92Fn  
prUP/yUWVBnx91RhvaikFv6nLpsFB9UunHLG96E6s/cbdP5jgSdt/Hwz1jek  
K+EiXYUsMLNeI3ET682Av8T06RssyJNM2niLguvds/yFdBkLwox/rmnd+1iq  
zunOo3IW5A/J6PFg/CSaHrKyigXlzzOHXmM9dHJbk8HOBhasuUfc0sJYhuvf  
d84zfp6ZjJ9CGDc1bHnQ28kC9zktFTrGcspv0607Md9C/R0ryViPxoafq/Sw  
oEng3aVij9+Et/39D0LlNX7XkRgewqWtzcH9OP3s27Un8H+hV5zkBH5xLlq  
Qp4Hedj/Fu7xhfIRnG9K6dlijK/pSPz7vV9ZMBnsPUzF+iGsUa369wQL+IpG  
HlhiFTPUn2Rdmcb5P/K7wQDzt5ZyKNLiOwteDR7avQ/r6/CRJY/P89jfg+/v  
lbN xv1tnmdEXWXB RfN0mK3zfXHt9s+KGZRYymq1WEcb5C+d987drRTJ4ygl/

E7uM7wN+oQNhvMmQ2mpqoob1qspT0XoZgWRQHn91fBXWlxEat67WCCXDyJLP  
44dYH3fS7G08xZKhmkv44BasT85vp1oUSyeD/FubF+XFBOoqUIFxE+GI0VK  
Qzdu4HnN38A9o5QMW3wLb0bcJFDUMc/hVJVkiBTidlDAeqa7ZbFxs0Yy8F91  
68+4/f+/571U8EErGerkiWi+M3SFQNH0T9eKGZLgQHW0veRf331i3n6o+9q81  
21v+Htb79sG2z4ySifG3Tf8Sxq9Xl/KJmiWDJt+baLcHBlpp/9ziZpUMdr17  
ZNZX4H3BXMvltU+Gjw/GOHEYv3Pw2Dm6OxmGrOvfHsOYIpwphLs/Gawtl14M  
4+/10rs6zngnw1JBi+9f31803aAyWd9koMg+Dj2GcR9LMLn2KH5+xOFiHbZv  
MF186vAJ/H1cchEXxgm7bJ15TyWDafhtfj3s/8DtYb2S0GSo2fqy3hH3s5FY  
rLhjeDLc6JYdP4DjHex61J12IRm2Bd8TssP8GOvvv2cSmwzXw5y2ad8iEDNI  
PrWPkgwzNgX7uTCfm13096oxk+GOPamaWUIgld0LcdLsZPhNuP/VxPkYVO4o  
X52WDOmXwr1qCrE/s8dEZrOTobmLsr7zPwL1sv0e1ZYmw98vN1ub/3+/ipj6  
eed2MvSEJ722xPUQ522mVnAvGbgetR16gueDjt67GMajZLDxzinuzMT5eSFq  
uq89GZgCR/qs8Dxweeh5zP5FMgxvmHmyhOtx3dXSDPNXyUBfcZDZiOfBEu13  
k97bZKhtnC+4jOu3K2j7d9UPydBwT+xcTBLW527pytIfk6FLbDHsHK73CDS8  
a/VwMujKreSlJeL7hYZ+9N/RZJAVjUovvw2hLHLx5sx4MrzUfcD5iOdHW7+c  
wNu5ZCicKKZcww0UeqvCr3YxGW7ae5vXxB0IhW+Iu1ew4aON5xo3jH00zora  
8LJh21vlpBCMjUWazU0E2NC6sHFmFn8vOC8RuF6YDZEFahkH8PnzY1tWqouy  
wTIw8fjmbH+w3ztLSZwNLq/15hH2r+1lvL4MwYYJeXuZUOz//eayFnFJNjiQ  
1wV24/hyq94cEpRmQ4WtrNdhzEfCraV5Hlk2HC0+deD//z8jNF+VtSzHhvzR  
8x1iuH8PpturLyhgDImqRul4n9FDamaV2FDyc6YlEfOvd+HSnom1bFiwXtKS  
xfnh9RuNHVBjw4mRef1u3L8z7sKy7zTYUNQQNPgE74NeB6M7LzWx/ebZF4XX  
cb6NyANNomwgPJ7q2+H94cajtLXUiA3ymn5oGtc/Pri7wJgNOxpmDSIq8X1j  
8sTxXBM2vLg2/OV7NYH+varKTDFjw819BS6NeJ8V/7f3x1lrHP9P1+MNeD8+

dM2/tcsWn/9ivr0K790nvN/819mx4ZWo90YivG9HjlLe9+xkw9LmtDIPvM+/  
y3RxyhzZsPftS811WK9xt8k70HaxQdNpl+HIK5xvnXt1m/awQdGgnb0F6z29  
/uWzwnvZoLfvRuvLd9hflr3+Zzc25DYrnn2Eshr5tN/aQfYEDQkxuXcj+/  
98Xo3w+zQWh71NIVrC9L/A5ath9hw7qK289eDhOoUqr4zzU/Nvg4HG1bGCHQ  
24htQS7H2SDrpWa59gvWC1qJ67RPsIGSsvrKWnx/mu/tGVxxkg1zHsZ/iDG8  
r8yD9pQHs+Gu+taqV1jfk5VCdFD2fCrr67w6gSeD1d5n3qHsUEp2zfZC9+3  
Ljx3XzQJZ4NyzQpTsW94/664YiIWwYbf2bTL9zE00mJUWh/JhlX8AlZvpgiU  
1NyueOoiGwTrg1Qbpgm0yknrqw4L88uzNm8Hvq/F9NDujuewofnzxPBe/Dw5  
vvvEk1w2QIDb7rf4+1wTjfwSPDaMpTm72mN8a+z4QMg1Njx63PaxDNuryXqQ  
uaMA59PhwSgPxu07V+xWLS1ksJ10AH727vksPp3ERu6J3MMqDie314jUcWl  
OB97GS/acPz8YnrGMbfYgORqIt9ifmQeR07vu82G3X5ce99g/oxVCR++e2zY  
9Df2QMFnAtm89pL/eJ8NP1fkBZ7BfLtSb7yuqGBD4lLK2c04H6FfLLb7V7NB  
yuqeFWsQ57fPr8ivhg1n1ZhlKz/i+8RLOp9fHa7Plgz9ozi/N6tfPjvyhA29  
RXfNF97j/XT757ojTWwYTYy6ro7rw65ANsHnKRswyWND0EOgz0mH7Q634f4s  
NOdi4nq7T6YWez9nw3qtX+k9uB7JZ0v4vTvZ4Nbts2ML1pPOgr3HDnWxwfru  
1ZR7WD8qHZ5t8erG9fX++Wfr5///+aikltdrNji5C9RO4np/ZL+F7tnDhoPb  
wlg3sH50N4rdcbAX8x+/e8kP3xc0tK6XePSxwWM1d7wP1o8/FVsFPAbwfDL2  
/BqK9XyTxLfbWbZMK1IzszA+p/DJ962fwjXQ1eyYAfWl95LRtr7R9iQ7Xn9  
kSTGG2fdGe6juF/eflIKxveJ5c9R4/u+skHd0ffmB6w/n/fm2e8bZ4Nw184P  
+zBeVabX7jrHBtvCHYYjuH+3xTbsdFnE/AQ7ftiFcYSr8/Nd3CkQ4iSfHYHx  
3XWDDo6rU+DHwbOmZg0E2iWuKewgkgJiXMcCOzCeXDzVYS+RAm3V6rER+Hz6  
yMOkHVlPmCFWor8F+6PR+c/RTi4FzGnjxoLY38aH20W2K6VAf07QjvH/x5Of  
3GmjkgJp/XTVbhzv5bA1u6y0U0D64zORUsyPsddRUUvdFFAu2cVJxfx1b7/9

Agyw/ZJjDafxDml/yt5m3EK3PYRdNmO+RaS3+aMTFPg2X49rtU4H0U3KD7a  
01JAclA7eiXOl6VpW5iU037ef71zHt9vtHI9zr30SIGT/MJJCRiLcX+7wDyU  
ArVr3kR/xd/P+0WTtx9JAfmJIE0C4/5W0Xjuoykwrr9ThBfb64p0Fxxg8lgKT  
sZvyj2J/mjbjk9YGpECrRN/nWuzvjRQDdkRQCuxVmX93+P//j3j/3stTZ1LA  
hWkmmYLjDxTMIX9+NgWW6jVa32G+DtWOXik5lwIGRkaGazC2VY645nshBbLL  
JwaKmd/EWFZpLyUFPj/To9+v/f/+Hqx9morPz9V//vohgfK1taAgPQWCrlor  
KWKc1hfyJDYzBS7q2v7xx3onEly+M8tOga+t2wW58Ly349founstBfbUFp91  
wHrFrDrIhV2QAvd+pkoWYr2yMfDh65OFKdDo86qYG2OpLrv3mjdSwKks1rcZ  
67fhzBNDueUpwOr+pxa09UrXi2O62x+kwIfAKtVArFdq+PzPT1emQMHi6zT  
eN+UbDvyNLMmBTZTGz8mYb2YcdZbAhpSYFCSZFeD9UzcbU+vr42YzwcWWlwY  
B385cIP9LAWKgp6/04D1jeca93mT9hTw3GF0s6MI30f37bX81JkCB3f9XtiP  
8V9j+1ByfwqodpdnFmD9c0dq2zXVyRRwn91GmcXPrziZTbVPp4Drmg6Fq/g8  
Bm2Ladj3FEh/85B6Gts7W2dMU/iVAscUY0jB2D/fecPupsUUkOMqVMrA/h/g  
GCxcWsL8itxX2ILj262rr3RyOQV+0Up+j2KM/HUDJLk5sPPR6j9HsJ4z4t7A  
HlvJgYBzPWGGmC/t3PUVtbwcoFK4I0IE6z/pHk1ufwEOMHePPv2C+RUJXadp  
KsgB0e5TR0dxPnhENjxEhDIQ12w4N4X15YyNalaFGAfemdNrx3H+Rj8pNzAk  
OMCtsbj2A85v/4W1o14kDjityLv7BOe/7YGiAZ8MB8llrkyf/f//v96t4P5B  
lgNjCReGbPA+f/hNLvq2PAdKT1/nCD7Cekxdpm3fGg7Yrhuisb306zHUjPr  
lTIQoRcRoYPrLcVTUopLIQP5GwPjujGOTpfwKdbgAJEcjsyP54XRmTHdAk00  
hDSI3PoP43HXhj9XtTkW3Nz81RjXb55RZku2DgeSk7ZNPcZ4LykoPVOXA1d5  
VSas8fxoeCW/MdmAA5T6ylhDXP86qa0tNGMOPpWyfLgfuGWUF86gzhANq7g  
3o3nxXt2zEY/Ww5k8aSJbsbzk8banGHlxoEztYOmSxgbMaeWIP054DkQ+aUM  
49WC9nriQRyglf15Y47xj/r111zhHNhdYXH4Bj6vkn9F5vQF7M/F1rl/2B4r

/mDbAJUDzmkiP3Zg7Leq8m9HEgesopmdqdg/MyqhX5vOafdndRNfsf8SPKd8  
b17hQNDvtQ9cMR4jt2VmX+eAf65u2hCOt+54keiJ+xyweHhIjg3jVGdKvGkj  
Bx7wWY7q4/eXG0OtrrVxoFwv1v05xsc2H/4n0M2BDV77RpOwve4bux6FvOeA  
xqtOpSDsj7kSOvt+kAM53bNsX+x/cYqOocVXDrCutrUfw/FJ8MpPF09zYCHq  
iFconj9REQKIYr8480HW07cReD59mfjlH7HMgU1nlp/+f566HBpVGeRNhZVS  
ko804PIW0/16YltwKti+Ilmp4/mnYduYdZuUCovTfFNtGKdUlbtJK6TC2tsL  
9lZ4fnrXOfOq6aSC6Z6w4xSMNzZO39MzSwWTGzeVT+P3fSiZHw0hFfrW5/dP  
4/MzbLYJbrZOHQKZ0BpnjNtWfTE2tUuFZPYh/zTsz/Izlo+5Qypk3yuJq8L+  
GtCNWeCcCs357Jo6HI+//UCVIWsq/P58xvkmjrfj+QZx+4OpYL+T9/ktzA8X  
642Zo3cqcE5y2E2YP6NdF445+6bCewX7nLH/8yumnrbnWCqIJGrI//313Ne  
Pq93C0wFlfENuz1xfro4YRP7gzEfga5epbieeVwVpD3DUuGaZdb5VRibSDZZ  
ekekwtTVpX1BdQQ60XMi6EhUKrx9EFE8hPuj2/1R83FKKpi/uhswjfvJ9MNq  
xWBmKjhrG+zWxvia54Gw8LRULGMHJ9i4/wQGS9qjclLhdGNh21qM39Ftflq  
UsHrvzFSK+7XQsPhpbgPqSCIMuhG///9ea/Vw77DqZAxsVjSE8asBP1Wm4IU  
mOnQdfbD9rnvud/W+J4Ku7/GHiFh/870X0zn+5MK55Pc5Kvq/v/zrs7DravT  
4NXpmotBOB7reAXdRLk00AxZGojBeE8zWxBppcGBiYO+Ghj7rOQdm9mcBny5  
uup0/H2Ixbmn/9mmAdeGt14d2F7MxW//ue1NA5JZjZM0xrl/3njVhKZB1/Fu  
W0fsX83ZOlkVdho8tsldcMDPG66/V5W7lAbtH2Qur8LnNb/6sUEiLw2uex/j  
fYlx2woxk9XFafDFo8s7Gdv3LjekvtOGry88FPQAuen29PWYfFhGhSERx39  
jPHbxMNuc/VpkD8v8DoS57OvKsp7/FkaCJRZ3l2J8z/4JTNg6EUayDu2+0Rh  
PHeVJ/XJdBqoZY9/rcb1wuMe8uiaaDrIRFx89rrx/39P0TEYp5QOX+esTof8  
v/+HtFb5bUiHSuE9uY/x9xnraOttzdKhfPCXYO29zRwyHndznT4+9455wv2  
R/NXVvbYsXTgs/ykvx5jeuye0VJaOpTxa+o4YVzWEzvH8zgdHq4YvS6Pv+9e

f2fZ80867G85LvMDxzuwMPq51DQDaDV1GwIxHxPNih2/z2XA6Q/dVD78PGPz  
5lLggwyYco7ZloHPsyipVlOayYAzM9Yt0TFWi9gvImqQCQ/vJG/ZiTHf9oVf  
/05nwh5r6vD/59H/ABZinOc=

"}}},

{RGBColor[0.880722, 0.611041, 0.142051], AbsoluteThickness[1.6], Opacity[1.],  
LineBox[CompressedData["

1:eJwVIHk01Ykbxk1jSUKp7FuRNUK4riXPF00TIWRLlrIPWe79RpZQyC5bXErW  
iUqTpewqDVkyhGLIOlLGRJKypPrd3x/vec/nn/d5zvOe8+x1DbDy2MLCwpLL  
nP9v3U/DH2m8LPos1LiWbl0n/cm02ar3weP6qsVrUuMtVEQ9FSPvBC/oz8c2  
sFnXHUG8+Xvj4Jf9Feu+j461muJvjdU65Tgb/oPj0zoDpgi+SazqpdPlug  
IVC6Ly/gJCrpdMq0IDu6xKwn8++6YHW50+h8MDeut1lj7BluSD3ROPtH5g4Y  
Vk+EhRz2QGEjzy0uHz5kBAIWFrd5olrI/Qyd2A0HivHKRXlvtIU2HhwR5Adr  
h8HDDPrveDXC80l/SQBLIje/CxT74B3Vva6sUwjyN3mnD9T7gmuDR+9ssBi4  
d85WZBb7QdTbneW1mQSiJMaszUP9ITA+NI2UKQknvvtupH4AJFPjDa0j9yji  
qMDD7XMA5PXUbnD47MNZaQ4HdfNAqC2MsTfbSOHRn3LCw1cDoXM93tufkMbE  
dhkJmelAmH0bU3wlKIO6RMKmxZEG2z/jUxNYZVHdu671NpMGFye1DzpLsrj1  
hJCLbqfBm3vc4sNrOfAHypI//0gd7UF8TUmnPHgT1dRCRegl81PbbXtPAZ4z  
T7zOEXTEiI0HcRYqgtM/x07ZnY6UnvjhlqQDuP1vxsRUDB3ZEWUwGAleDgQ  
Ic+L6ChQGr8q5aoMP6rxa5lmOsrG4zeHzA7CRZYaIDNIx9/GQgc7RFVg/PMe  
hY05OsYKFicLMIWw1v10uGeTjqkvbekW1Wh/SLo8zMeErPmeYRVpCoGE++P  
7ZlGMV/mv6y4oopnZj2NPUokFr8blrL5qOGk7PhpAR0Sy7ZC1pOTaujLHKzj  
NiGxeneRtdHmElgjTl3PLUlssrfXZj4/BIUZTkGfkyRYXPI8zxDqeLmNI+OH  
GwnWen8B43p1KEV84Sj2JcHJa/RUQkkDkpYfPk7TSfB4CYWul2igV8Dg9fEQ  
EnyPFuUHBTvXlnXA0j6CBL9A++idy5roT5UP5IomIRKQlxzHSsHUWc3vC5dl

SHb6654Ko4BWOT2jk0hCWsjogbpEQdEE9QVLCgm5c0IFuzy1cDRSoMHkMgml  
vkXzhddaiL7+NVY4nYSabPuPJ5ZU/LRkHxmdQUIzKq+qqJOKwpraXQmZJLSH  
/U+H6WnD+OhbkUNZJPQPGvFZ39PG34mbnUIMNooXalOS18FKRkFtNpOPTC6S  
HIU60DOPy3dg8m+Udunp3bpQ/sfecpx5zzIt71VTki5aW5x7pZls+84/7gqL  
Hm47L1A0mPoO+kYU/2A9ZNdx+f+Nj+l0OVyhQ/aHlLu2KrlKm/y1909g+Bx3G  
I3JH8pZUEkP8q74Nnw9jXnQi41AyiQrn8YHwIH0MmkoNaDPzuFDWRtX/rI8d  
sYVLIvEkFFatLS5qA9OnBLRGY0l8P6xTb9QEeLV+lN+IljHnetdHZgNImxuQ  
PM3MfyBur/hWbQLvQkcXKsNIlPdyXHreSCB9ScCS04iEhfNLK6tGA+y3HxJZ  
82bmFW3Crr5uAMHh9B99Hsx/IDU17qEaon88yTPflcT6QpHkSIMhcjoS+/kd  
SZRE+C26NBhhzjSG47Y5iZV89iS/emP4N9RqvVIjMdEaqnds1RgqpU8emx4k  
8fTN+yUVignoQys7WhVJXD8waLdSZ4IDEZvrJdlkjFsK94cze8407Y/7dvwk  
cl9rPU6oPYqHh+7LFazToSPsu1Z6zxwFQV+h0kqHZsHlb+m9thB3ceypXaQh  
rjltaELMGV7nz+yTUqBhfv7Y1jdsbtBoTin3dg7EBjGwKNroiSeTo135lgFI  
Ehi7VNrsA9mk4PIHI37Q+NSYQKvwh275bcyEnoHH9sT5x4o0tP5VqG0KXwRO  
rM3R5ElUC5/40+Tr7wh4tX+7EVsQ1H0pnbMj3jjfpzvbOByMxWrHPwy6vPAS  
gZEz1B+CmILYspIqT2zzqjyz53YYpKK29ufXeicZlUvk663z6GA1Fmutdofw  
DYuo2KJILDdnXAx+6AbzWnnWX00LyCxyOVE264rK1W71x1oXcW1FLO47qyuS  
unvPfd0fDT/z4rom3dNgu7gswykbg6rFmZp4v1PgoHBVe0vFwipX7YS0nQti  
oqLNRnguYeuDOmnPb04oLBexFeOJQ2oV+3sHhiM0XHfR6JtxyC0NeyBjfxJW  
4ixeQm/j4XK+oab5gAN4m3ieZc0kINckss/liz2M58L1JF4kYtM1N6Zp2g5i  
X7aJR75IQkWkg5lXmy3C2dJGlLuTcUWnluFQb4Pj5bTypboUuNT8lBn81BrP  
5YKnL9WmorBgyGbzxXE81B1ROIB6GTcNR9WcV6xAsVK1kU5Jw6nJ/t2/77fC  
zVKblXNG6WA5+z78hbkl608IE8+mdFiOi9xNSrPAdhF9i8PaGXhj8Db156xj



mGH4/INQnYE/VZStZIXNEZnN53pTJhPyD8L33n37G/6N7mJcu5EJF8rAakCa  
KTlaq20FRLOQ4ad765zTUXBO3Xp+Pj8LbesNjmOSvzL7QlQ5WfgKRlqndoat  
maDl3EOhfelXYDd38r7VkjFY7WnNjBzZkjm++V/zxC9IvHj8bUVcNjrN+S1e  
zhthQLHqu9PXbFxbmA/mZDfCfx1iPeuhOQj6UC47KmgI4laTtPhSDi7da5sj  
+MUADYUcd5SWcxD4MWH5JWEAlRzrQ3orOdDK96/XPmwa8ZhFwnEtBz+SON22  
Ugyw4bjP5SoLA2d5o/XuyBmgZkdSHv9OBvrbCyf3bDeAdMgJHl41BsIsQ0cD  
Bglc8y/LFIdnoER0t9d/fQT4PD6JKmsysJFie8OrmWCLVaQimTYDiaa/arp2  
EBhXfHwk2YCB39plylZqCeRMysVwHGegsq0jMPwaAe6hoG0CNgwI93dpbskl  
ENv9V4aMHQMftY9HJF4hQG90LPrJAOqgh6CV1MjMgElP4hxY0A+oie6LYpA  
R+K4UZYHA+IsypnHzhPQvaDQXeLFgOjDH8fGQggo+LWPPvZIIH7Eb2iVRqDY  
badrvx9T725HQZw/AUEH53+nAhjguMO2h9+X2XMWFYFLNAYmL3NRy7wlcJis  
rf4gGaDy1W6juBP4H+TfTu8=

"}],

{RGBColor[0.560181, 0.691569, 0.194885], AbsoluteThickness[1.6], Opacity[1.],  
LineBox[CompressedData["

1:e]wVznk4llsCBvC5jonSGVGhkBYnMZYSJuu8UxO3UyRChJHdCI0yKaJswzDz  
WTIfjRxKablZooal0+JUuogLpXSJqSsN6Xj/vE+7/P7533eVb4RTgEyFAol  
fC7/b6uxri88RQrz+Guvxv5dTOZL4m3FEL+P2Vz9slCrSh3xf2kevMwfZnr2  
7+PrXdeDwH/A9ovaJNPmVoNU120jHg+Y787g/2AKa6+wft5sQnpVS8Virgwo  
fiHUALUbXI2MZPSrzUPSRbbVdj4LU19b2LH8XxF4Pteqs30rRO7St2ezF2Gs  
bH200X07FElp5QpcZZjkoXN+8TZULvPfH8lagp9Uc/r4nu24fURq1K2mgdsF  
f+z8fXIHOrppY8xRVZwdZHdtOuqA9+b+tWUty3C/ounKrXc7ofCNZn2Ir4ny  
6uLQIOyChoc/5b/2Wujr7DV49HwXVPt6+4uzV0Jh4u3D08FO0LU2PifHXY2E

5zbl/4p0hvFw77x6lzUYHuI4HBxyhuUZQXA4SxsmtfrP2n12w/5HL71DbS04  
R5psjc1d4HpFIEqV1cHgB7XyhYUu4HgZf7Yc1YG1kqtR8qwLeA2CqplWXXRO  
yfuUV7si95ix+QG+AaqWWpbdmXRDoUHfqTW+htiY4xr3CHtQ1if43mlvBFPq  
iKUodQ96C0deFmavR7iAe2ZAYR0js1tKqVxjpFlQopYv8oDyrRHdZ2pm4Epm  
zUKe7YWK6p2ey2IzcHKIQpq8J9Qj8tNTZBmodeBuVrLyhLYWe9h8lIGOQZe9  
3iWeMIvPryhuMZ/7XW9jGulFDyabEc63hmHWC6/Yd94wFOgVbpi0Rh13Z8Oo  
GgcyxdRJ6JsMC2DUPp2Di559z2NiWLiRprcwC9XOzi1sbzOrgM0GgddHC18  
40j9t50TddM+U3TTe777YLxgnjDsui02fhhJ+x/1heXy00nSagfwnSxCb8A  
mBWKf2S2uSLcTzyx6SwXKfVE5wtNb1SXnWKOZEVgcHCn/ADVdywtB/0h10h8  
Yz0d0ZAGItmgh09WcAhC1d7k0nouWO/PPadN8WE6Jk3lXQrH52fZZdvoRxCw  
MG2wmc5DnrLPLzqrY3DgxfQHnu5BOckFZlHpxxDR8dtCNjUK4yvfnHrPxCH2  
sdVbaRcfXKW7rKNux3E/lZR0tkejxG0r3c78BBYEXd2/90JRtPk6dghlEpAu  
q6A+Ux4LKYfxZOBpApafc4xPKo5DZJ5+y3hulhxqdGXzLI7DvrH/5oMtSbg6  
1WrSvOkENpj4BA50JUH2nZ45rcErC5e2hyTlwzqia9r5+skYseAYViBTQrk  
GAqVwWuSsIrTFKPVk4LE+AT7bloydEJJ0zp/AYrOq7tq0lLQJP3pumVcAFPf  
xbzI7ylojY80tTiUCqcVlKBI7wQQTxz7snkoFYp1tPs5b1Iht15z+3+C02D7  
IcZa60ka3ELMGnK70qA5uWBF3BMhbPSCRd6/CxFDJboNW9Nxl3av7VmNEM7n  
eedHazMQ1s8Q5y1Nx8N1/P7kGhGaT5cL26LT0WjVbaBfKsZMcPY3Zns6GE4b  
XLQzCNADWccZ2hm4UOoyfpidiaJ9r8dsjmYg8j3LLrAuE+1p2n8N3cvAQnWm  
o41FFvzsqiWOKiK8IUNfF1ZmYdrbP0DNS4S4XGXfC2uz0Xe3xT62SISPCQ/I  
0+eykTZ9k7NtQIQsaaWrqkYOLg8d7jizSoz5r8ofxhbkgKK2ePmSfWKwBRqG  
6ctP4sKadZdiC8S4ebhx2erMk2jj3+cb0S6G7B5efYliLlrm1i28gTSTji/  
u5SSC4qp3CddcwJP6RWzXj0560h8qj4viMCnu5qP/ndEglmu0ddMCQFWeZ32

ilEJgJxO8r40EbhRJHfZ4KsEew9t4F1sJrBesnuj9bgEihM7dvj9SWBF4gJL  
c1qCL14auX/fjvDNczXnFIVEiMIHXs09AlWLhPkqSiSM9Aq9D7QS0152pyka  
k9gm78d42EXgdHhZ7goTEmX6r67FPyegHDCmYWhGosqwmWbSTYDiJKLbW5Bw  
3/rAraCHQB+9+d/pm0mcUZQyQ/sISF6uS5RzJhF3RSFM5g2BXzujFqi6kMgY  
nK2+Nuek1j+z1rqRCPh0uytwgECk1LN4614SM5Uvah68JeCQk9mQ6Edi/znV  
R5kfCNxN62PnBJCicXafYX0kYHVcr7UkiITfjdJ5Y3PWC7vT0xxKgrUy/Nru  
TwT+8FPybQ+b23s540odIqDm4f3xVQSJJU+udNbM0dPx0oFRHomRNUHGwGEC  
cnbTUz8Pkhisyw9TGSHWd5ZNLG8=

"}]]}}},

AspectRatio->0.6180339887498948,

Axes->{True, True},

AxesLabel->{None, None},

AxesOrigin->{0, 0},

DisplayFunction->Identity,

Frame->{{False, False}, {False, False}},

FrameLabel->{{None, None}, {None, None}},

FrameTicks->{{Automatic, Automatic}, {Automatic, Automatic}},

GridLines->{None, None},

GridLinesStyle->Directive[GrayLevel[0.5, 0.4]],

Method->{},

PlotRange->{{0, 1650.0296}, {0, 1256.366485}},

PlotRangeClipping->True,

PlotRangePadding->{{Scaled[0.02], Scaled[0.02]}, {Scaled[0.02], Scaled[0.05]}},

Ticks->{Automatic, Automatic}] \) \!\(\\*

GraphicsBox[{{},

{RGBColor[0.368417, 0.506779, 0.709798], PointSize[0.6], AbsoluteThickness[1.6],  
EdgeForm[{GrayLevel[0], Opacity[0.3]}],

{RGBColor[0.368417, 0.506779, 0.709798], PointSize[0.6], AbsoluteThickness[1.6],  
EdgeForm[{GrayLevel[0], Opacity[0.3]}], PointBox[NCache[{Scaled[{Rational[1, 2],  
Rational[1, 2]}]}, {Scaled[{0.5, 0.5}]}]}]}],

AspectRatio->Full,

BaselinePosition->(Scaled[0.1] -> Baseline),

ImagePadding->Automatic,

ImageSize->{10, 10},

PlotRangePadding->None] \) blood

\!\(\\*

GraphicsBox[{{},

{RGBColor[0.880722, 0.611041, 0.142051], PointSize[0.6], AbsoluteThickness[1.6],  
EdgeForm[{GrayLevel[0], Opacity[0.3]}],

{RGBColor[0.880722, 0.611041, 0.142051], PointSize[0.6], AbsoluteThickness[1.6],  
EdgeForm[{GrayLevel[0], Opacity[0.3]}], PointBox[NCache[{Scaled[{Rational[1, 2],  
Rational[1, 2]}]}, {Scaled[{0.5, 0.5}]}]}]}],

AspectRatio->Full,

BaselinePosition->(Scaled[0.1] -> Baseline),

ImagePadding->Automatic,

ImageSize->{10, 10},

PlotRangePadding->None] \) liver

\!\(\\*

GraphicsBox[{{},

```
{RGBColor[0.560181, 0.691569, 0.194885], PointSize[0.6], AbsoluteThickness[1.6],  
EdgeForm[{GrayLevel[0], Opacity[0.3]}],
```

```
{RGBColor[0.560181, 0.691569, 0.194885], PointSize[0.6], AbsoluteThickness[1.6],  
EdgeForm[{GrayLevel[0], Opacity[0.3]}], PointBox[NCache[{Scaled[{Rational[1, 2],  
Rational[1, 2]}], {Scaled[{0.5, 0.5}]}]}]}],
```

```
AspectRatio->Full,
```

```
BaselinePosition->(Scaled[0.1] -> Baseline),
```

```
ImagePadding->Automatic,
```

```
ImageSize->{10, 10},
```

```
PlotRangePadding->None]) gi
```

```
.
```

```
(*-----  
-----  
-----next mouse*)
```

```
vn=readTac["C:\\Users\\exx\\Downloads\\TbAM1, Liver 2.117875, GI 1.141, ID  
3589.csv"];
```

```
Lv=2.117875;
```

```
Gv=1.141;
```

```
id=3589;
```

```
vn[[1]][[1]]
```

```
{{10,221.007},{30,525.752},{50,330.628},{70,262.197},{90,228.799},{110,194.128},
{130,168.753},{150,148.15},{170,134.166},{190,123.435},{210,114.001},{230,106.9
09},{250,99.4315},{270,95.1953},{290,89.9459},{330,82.7761},{390,73.6644},{450,
67.8311},{510,62.6397},{570,60.1661},{750,53.651},{1050,47.002},{1350,44.3574},
{1650.03,44.8685}}
```

```
model= mouseModel[Lv,Gv,id,32]
```

```
ParametricFunction[!\(\(\*
```

```
GraphicsBox[RasterBox[{{179, 179, 179, 179, 179, 179, 179, 179, 179, 179, 179,
179}, {179, 180, 180, 180, 179, 179, 179, 179, 179, 179, 179, 179}, {179, 179, 180,
179, 179, 248, 248, 178, 179, 179, 179, 179}, {179, 179, 180, 179, 179, 253, 248,
179, 179, 179, 179, 179}, {179, 179, 179, 179, 179, 248, 248, 179, 179, 179, 179,
179}, {179, 179, 248, 248, 248, 248, 248, 248, 248, 179, 179}, {179, 179, 248,
248, 248, 248, 248, 248, 179, 179}, {179, 179, 179, 179, 179, 248, 248,
179, 179, 179, 179, 179}, {179, 180, 179, 179, 179, 252, 248, 179, 178, 179, 180,
179}, {179, 180, 180, 179, 179, 248, 248, 179, 180, 180, 180, 179}, {179, 179, 179,
179, 179, 179, 179, 179, 179, 179, 179, 179}, {179, 179, 179, 179, 179, 179, 179,
179, 179, 179, 179, 179}}, {{0, 0}, {12, 12}}, {0, 255},
```

```
ColorFunction->GrayLevel],
```

```
BaselinePosition->Bottom,
```

```
ImageSize->{12, 12},
```

```
PlotRange->{{0, 12}, {0, 12}}] \) \(\*
```

```
GraphicsBox[{{}, {}],
```

```
{GrayLevel[0.55], AbsoluteThickness[1.5], Opacity[1.],
LineBox[{{9.09090909090909*^-8, 9.090909090884856*^-8},
{0.0874367476365131, 0.08197166587636243}, {0.18222810297558026`,
0.1358255024317191}, {0.27073779576926765`, 0.13315455086535802`},
{0.3575112797365835, 0.08143316377978886}, {0.4516394623155443, -
0.007347854733426912}, {0.5394859823491253, -0.08816932746972758},
{0.6346872009943513, -0.13787329990112937`}, {0.7281522108132057, -
0.12816574147938434`}, {0.8153355580866803, -0.07001063326902106},
{0.9098736039718, 0.02121659675083076}, {0.9999999090909091,
0.10024804094746914`}}}],
```

```
{GrayLevel[0.55], AbsoluteThickness[1.5], Opacity[1.],
LineBox[{{9.09090909090909*^-8, 9.090909090880112*^-8},
{0.0874367476365131, 0.08090369567458766}, {0.18222810297558026`,
0.12746559200130417`}, {0.27073779576926765`, 0.1116266937044405},
```

{0.3575112797365835, 0.046963725126600256`}, {0.4516394623155443, -0.04509050859182233}, {0.5394859823491253, -0.11115559892361665`}, {0.6346872009943513, -0.12642564594664163`}, {0.7281522108132057, -0.07740196037964171}, {0.8153355580866803, 0.004179083230780074}, {0.9098736039718, 0.08937493944143977}, {0.9999999090909091, 0.12834702174618903`}}},

{GrayLevel[0.55], AbsoluteThickness[1.5], Opacity[1.], LineBox[{{9.09090909090909\*^-8, 9.090909090875369\*^-8}, {0.0874367476365131, 0.07984396759533968}, {0.18222810297558026`, 0.11939549826670079`}, {0.27073779576926765`, 0.09184904274707059}, {0.3575112797365835, 0.017913117173780694`}, {0.4516394623155443, -0.07109962300031061}, {0.5394859823491253, -0.11717052830989395`}, {0.6346872009943513, -0.09879571259704382}, {0.7281522108132057, -0.022693471356141894`}, {0.8153355580866803, 0.06128703302641453}, {0.9098736039718, 0.11605625481609519`}, {0.9999999090909091, 0.10415981267620744`}}}],

{GrayLevel[0.55], AbsoluteThickness[1.5], Opacity[1.], LineBox[{{9.09090909090909\*^-8, 9.090909090870287\*^-8}, {0.0874367476365131, 0.07879243663407876}, {0.18222810297558026`, 0.1116081822210312}, {0.27073779576926765`, 0.07372482040530459}, {0.3575112797365835, -0.006267252216927747}, {0.4516394623155443, -0.08743897872291118}, {0.5394859823491253, -0.11109134853087661`}, {0.6346872009943513, -0.06371549528296311}, {0.7281522108132057, 0.02544576624054603}, {0.8153355580866803, 0.09464282937855747}, {0.9098736039718, 0.10731931496853601`}, {0.9999999090909091, 0.0516787429232188}}}],

{GrayLevel[0.55], AbsoluteThickness[1.5], Opacity[1.], LineBox[{{9.09090909090909\*^-8, 9.090909090865543\*^-8}, {0.0874367476365131, 0.07774905743802465}, {0.18222810297558026`, 0.10409673959866513`}, {0.27073779576926765`, 0.05716133039337165}, {0.3575112797365835, -0.026084496726167965`}, {0.4516394623155443, -0.09591154799603378}, {0.5394859823491253, -0.09685594593277226}, {0.6346872009943513, -0.02730376120671303}, {0.7281522108132057, 0.061646715198529656`}, {0.8153355580866803, 0.1046634148537508}, {0.9098736039718, 0.07509702498429204}, {0.9999999090909091, -0.006536873471333553}}}],

{GrayLevel[0.55], AbsoluteThickness[1.5], Opacity[1.], LineBox[{{9.09090909090909\*^-8, 9.0909090908608\*^-8}, {0.0874367476365131, 0.07671378556951527}, {0.18222810297558026`, 0.09685439581479163}, {0.27073779576926765`, 0.042069810325321415`}, {0.3575112797365835, -0.042006785469922474`}, {0.4516394623155443, -0.09808544986431629}, {0.5394859823491253, -0.07760167026270944},

{0.6346872009943513, 0.0063643674428021085`}, {0.7281522108132057, 0.08405712128907425}, {0.8153355580866803, 0.09555213349985489}, {0.9098736039718, 0.03202960165577907}, {0.9999999090909091, -0.054402034659985464`}}}],

AspectRatio->1,

Axes->{False, False},

AxesLabel->{None, None},

AxesOrigin->{0, 0},

Background->GrayLevel[0.93],

BaseStyle->{FontFamily -> "Arial"},

DisplayFunction->Identity,

Frame->{{True, True}, {True, True}},

FrameLabel->{{None, None}, {None, None}},

FrameStyle->Directive[Thickness[Tiny], GrayLevel[0.7]],

FrameTicks->{{None, None}, {None, None}},

GridLines->{None, None},

GridLinesStyle->Directive[GrayLevel[0.5, 0.4]],

ImageSize->{Automatic, 28.4375},

LabelStyle->{FontFamily -> "Arial"},

Method->{"ScalingFunctions" -> None},

PlotRange->{All, All},

PlotRangeClipping->True,

PlotRangePadding->{Automatic, Automatic},

Ticks->{Automatic, Automatic}] \) Expression: {Bl,Li,G}

Parameters: {k1,k2,k3,k4,k5,k6}



]

```
Manipulate[Show[ListPlot[vn[[1]],PlotRange->Full,PlotLegends-  
>{"blood","liver","gi"}],Plot[Through[model[k1,k2,k3,k4,k5,k6][t]],{t,0,1500},PlotRa  
nge->Full,PlotLegends-  
>{"Blood","Liver","Gi"}]],{k1,0.001,0.2},{k2,0.0001,0.1},{k3,1.*^-  
6,0.01},{k4,0.001,0.2},{k5,0.0001,0.01},{k6,0.0001,0.01}]
```

```
Manipulate[Show[ListPlot[vn[[1]], PlotRange -> Full,  
  
PlotLegends -> {"blood", "liver", "gi"},  
  
Plot[Through[model[k1, k2, k3, k4, k5, k6][t]], {t, 0, 1500},  
  
PlotRange -> Full, PlotLegends -> {"Blood", "Liver", "Gi"}]],  
  
{k1, 0.001, 0.2}, {k2, 0.0001, 0.1}, {k3, 1.*^-6, 0.01}, {k4, 0.001, 0.2},  
  
{k5, 0.0001, 0.01}, {k6, 0.0001, 0.01}]
```

```
Clear[newmodel]
```

```
newmodel[k1_,k2_,k3_,k4_,k5_,k6_][i_,t_]:=Through[model[k1,k2,k3,k4,k5,k6][t],List  
][[i]];/And@@NumericQ/@{k1,k2,k3,k4,k5,k6,i,t};
```

```
fit2=NonlinearModelFit[vn[[2]],{newmodel[k1,k2,k3,k4,k5,k6][i,t],{k1>=0},{k2>0},{  
k3>=0},{k4>=0},{k5>=0},{k6>=0}},{k1,0.008},{k2,0.0001},{k3,0.0014},{k4,0.001  
,{k5,0.0001},{k6,0.0001}},{i,t}]
```

NonlinearModelFit::eit: The algorithm does not converge to the tolerance of  $4.806217383937354 \times 10^{-6}$  in 500 iterations. The best estimated solution, with feasibility residual, KKT residual, or complementary residual of  $\{5.17333 \times 10^{-14}, 0.0000292921, 1.77944 \times 10^{-14}\}$ , is returned. >>

```
FittedModel[newmodel[0.00321846,5.86338*10^-  
13,<<22>>,<<22>>,0.0213219,5.86338*10^-13][i,t]]
```

```
{fit2["AdjustedRSquared"],fit2["AIC"]}
```

FittedModel::constr: The property values {AIC} assume an unconstrained model. The results for these properties may not be valid, particularly if the fitted parameters are near a constraint boundary. >>

{0.81252,874.254}

fit2["ParameterTable"]

FittedModel::constr: The property values {ParameterTable} assume an unconstrained model. The results for these properties may not be valid, particularly if the fitted parameters are near a constraint boundary. >>

|    | Estimate       | Standard Error | t-Statistic    | P-Value        |
|----|----------------|----------------|----------------|----------------|
| k1 | 0.00321846     | 0.000679445    | 4.73690        | 0.0000119412   |
| k2 | 5.86338*10^-13 | 0.00134191     | 4.36942*10^-10 | 1              |
| k3 | 0.00064791     | 0.00109722     | 0.59050        | 0.556872       |
| k4 | 0.00216375     | 0.000448103    | 4.82878        | 5.0854*10^-6   |
| k5 | 0.0213219      | 0.00275661     | 7.73483        | 7.89807*10^-11 |
| k6 | 5.86338*10^-13 | 0.000685183    | 8.55739*10^-10 | 1              |

```
Show[ListPlot[vn[[1]],PlotRange->Full,PlotLegends->{"blood","liver","gi"}],Plot[{fit2[1,t],fit2[2,t],fit2[3,t]},{t,0,1501},PlotRange->Full]
```

```
]
```

```
!\(\*
```

```
GraphicsBox[{{}, {}],
```

```
{RGBColor[0.368417, 0.506779, 0.709798], PointSize[0.016666666666666666^], AbsoluteThickness[1.6], PointBox[CompressedData["
```

```
1:e]xTTMoPSmViYGCQAGIQDQEqDoEx85stFmQ7QPh2Dr6KC8tZ8hqgfE8H/VwL
```

```
Hd5VJRB+Q6BDcP8jEfXkAig/zKEylOdP78wcKD/aofZ/N4+4SwaE75DgINp9
```

X0RMihXCP5DkMEP/CtuZliSofKrDtU8izYFHE6Dy6Q5a54v6b9+Og8pnOYQu  
+2wj3BADlc9xcHZsEdbZFQWVz3e4XPC4cu7tCAj/QYEDvzJHQ/2ZcAhfocih  
V+/U8c6aMAh/QYnD1+/n7NdsDIHwEyoc/t2avr8lKwiqvsvBeen1dsOvAVDz  
6h0Cs819Hwb6Q/gXGh0eS9nMdx1g/AL2h3eZpu8DrrsBeFnTHCoajrz3L7B  
HcKXmOqg81as8oCum8PN+DJ/uRMzHXQ8Y85r5rs5AACcD3DH

"}}},

{RGBColor[0.880722, 0.611041, 0.142051], PointSize[0.016666666666666666`],  
AbsoluteThickness[1.6], PointBox[CompressedData["

1:e]xTTMoPSmViYGCQAGIQDQEqDvzRTUtlb+o6QPh2DkZPGU0WswdD+Z4Ouw1n  
SNUkxkD4DYEObFdX565flgDlhZlsWvhtm8mqRCg/2mFu05+cj8+TIHyHBIdl  
TjZC+l4pEP6BJIeTHmuqoxpTofKpDitXHLApcEmDyqc79Asl/G1ZAeU7ZDmE  
n7sn+dYmHSqf48BY8vlF4iYo3yHf4dlEe4kdT6D8BwUOa60SK6SnQPkKRQ41  
lzpZ]kdA+QtKHNPPrq+S3g41P6HCod/rtwHPMah7FGocdPpEbudpQfkP6h1u  
rxSZdjK06v4LjQ57v4kpSC9LhvAL2h2utfwL/j0Z6v+MCQ67nq9302mOg/Al  
pjo08a2MeN0Y7XAzvsxf7sRMh9NG8tmKKIEOAA4NdHg=

"}}},

{RGBColor[0.560181, 0.691569, 0.194885], PointSize[0.016666666666666666`],  
AbsoluteThickness[1.6], PointBox[CompressedData["

1:e]xTTMoPSmViYGCQAGIQDQEqDk/usxjVdpo6QPh2DnPnlScfbImF8j0dGifn  
PugzS4PwGwIdGrcZpKm5ZEH5YQ7hKmorHh7]gfkjHSa+4lqOm]QH4TskOBjc  
srNf7lsA4R9IcpgyV3m6SjmU75DqEDG3uzSBqxAqn+4wsTlXXrcWynflcjit  
32yYJfKElc9xmF3+PXraKijfId9B5sxptntPoPwHBQ77dTz6zjcWQ/gKRQ6z  
Hzi83fMTyI9Q4iD3613YtV0lEH5ChYPY1MN3+a+VQtXXOCx5fFT2VH8Z1Lx6  
B6nv3XUzLcoh/AuNDlJS/iwfd0D5Be0001PSNhhHVkL4GRMcln5TupX3oRrC

l5jqsOyOMeNVpTqHm/Fl/nInZjrcuH3wsZl3vQMAYXJ3tQ==

"[]}, {}, {}, {}, {}.

{RGBColor[0.368417, 0.506779, 0.709798], AbsoluteThickness[1.6], Opacity[1.],  
LineBox[CompressedData["

1:e]wUV3k4IW8TRrYkCSIECEWIY/fjece+77IUspN93/d9d5xzQkKSrZRslaVs  
FZKEIEhSyZaQSSjyne+v95prnpnnvmfumet9+Bx9TV2oKCgoXlNTUPz/q/Rr  
/Kf/EQrsFsE3pARHgE+53+qXQz5iLVPu3I1beRDbzx14N+QH1uZ15FVYdx68  
nlUwzwrZxQz+dF5jNcuDv+t96lEhh6H1XmapWgweDm0zKQeFcmNhLceSvG/Z  
cPKiM8UHg1Nwd1PvKlNahz/OPW5jMALeeMH/90/lw3CyrhKOG9+sGsNZTQN  
yQKD3alzb08IgrhD8/OGE5lwNRqn4BciBvpy0tF/c9KgV0xj0WIHcXjpRLMm  
pJoGVR9Td94ZnIezPPzFmhupMFW68qmUIAFK6VRceg6psLkndovGAwe6kwER  
J1RTgKVzRfjNCVIIIfCiGHEShgP34s8m7ObJg3xzEoP0jEbh8r2WmUMsB5e55  
td91iSBwSv2HwpocyIQ+OEaUTgTZ2Gv1ZX0KcN08i6FG0wEuYupyPiHKoENJ  
9UKZEAfiqSKlkhvKIBp3j4btYhxQvWam+ROMoHn5QmMNfxzU2n0cjQzGoBI/  
EkzrFQt76L9H6m0A0sZrYj4D0WBsN2Zq2qoKry8kEs/0RYBighat9JYq5D98  
wOHqFQECVW2txxTU40NnS+v3LBGw9a0Md6JFDV75e3VoOYVDebT3yuUWdTg0  
tcr/+WgY/C6mzfb+pAllPXF+j8qDYborXNnoryZ0Bztec7IOhv7Z5TUJOS14  
+XbyMv3RYCgRfWP5+6EWKDS2NognBoHm4xuChkQ+1QXKPQo8YEAiFH+S70x7o  
guHvHzNskf6QsF8b5PFHF+a5K6reYv7gdfrUWX0ZPbA5PIFdpvEHFU+a3CMP  
9CCA4VhZD8EPlrZHbPKb9YHjnM3eAW9f+I/Tc/NWkyG42V2OcsW84NmX4Dwd  
VUOwV7llv/nNE/Rr4xZWRYxA3XizoDLbE+yU8t//V24EnE2/8WozHqBy337q  
irYxmHDGD4kQroDzSOZjSjkTIPDnWn8UdIMambyWMXMTqIusCSNNucKPa/nN  
1QEmoFW0x6RIrhDiePOuQZ0JPF/679VJWldI/fWw+JqgKbzZvMR84bcz3Dn2  
JUqSzQyCaExnqDcdYSV8PowaZwZTnEZBG+2OIDW9HdRUZAYcy+fVquIc4XHV

X6/oTDN4n1hlK8foCK/kDtu+oDKH0rFajk/nHGDNWl7Z4ac5mPtnS1awXwbp  
DmUF6SMXQLUvv1yu2Q7C+dV6kMQuAPNA2SKVmR1QfTcQu+d+AQK80PklSbbA  
GuXEvfXpAnxaTFGKFbAB2dKcXfyQBbRQ/ul4HW4NteXr0kPflcB5yPNZm4g1  
8FZbeB06aAkb03eWiqas4FA9z4dkNUuYdBm+eF7NCma661oiWiyByqeSz5rL  
EjK+DQU6l1uBv52Hvu4fc9hfxNXe7LSCsaL524rN5hC0kv9lmpxnXOEL459A  
c7j8187E+rg1HPuWY9fxxwykD66KG2ZZw+zbuF7KjOYFj2yJBdyESYpimMn  
IU3ATDKQL5h4EaQz48fM6U2gX2bcqrH+IjTxugYFvzGGjnsjT/T7Rej/Me50  
09MY0ozPV/LZX4LPsvjzbzWNABdkZH9I1wamL/WtaNvpQ3VYU4G2mw14LT3J  
V6DVh5PRx18nj9nAU66/fv/d1w06IE/KFJ02cCfw8jdnaj2YKvDl+iNIC4nT  
E4//tulASnvuu2lu04gbP+obbKEFq/9CI/OV7WCvF1NYpNMCKyV7XkNbOxA+  
tG/g0qYJlk8kPJ4U2wEDgxTlFX5NeN0xsnud6zLcF4uUVtlTB8bP6YS7jPZw  
YJF9yOqLKgDlnnPaSXuwkk81HChXhWC+ADlnUXuQOPvs21FnVZh2uDjFpW8P  
zxwlp08vqkDDFxGhzEx7GL0i7+/A2Ax+7L1CoMDrB4+rFyWiyCDGrI0OB3A  
myNK9PIZBJ0CzXZ8lg5QMFDcofZUGc66FB+Y0HGAYV/FTKUdjf3zctAO90B  
zhRZtFdG/wdl84c/C9E7glKyvMmtNnkYo0toojpB1jGHzhV3N3k4eHYjefqM  
I+xHRUxqHJOHAPdpkXwtR8Cxbgn8FyQHGot1QTSpjnCMdXq2BsnC0pIR/SyN  
E7w9psmLp5IGzd+L3+vZnMA2Xdzn/IMpKN9NfB192gmuqG+rkpKl4BjzS/5x  
FSfodD3sUnFICgZleAX1opygnovLvYQXB3VxayqN606g8SpQnNpLAhgyMgRj  
KZ2B3e8BuilvAa5EgYP6zM7gKa7i4EcjAaeqrla/iTnDrP1edpvqecC/7LLj  
uOIMYZe4f212iUEAe15k3CdnuDX655nlbxEYOnXussGKM5g1G0/euiECIsLP  
VTl3nYHul6Pltp4IfP1v62Azpwtw+RiFt1YLg7mDQ+H8BRdQ1T63LuB5FmTv  
Sj4wHHQB0Ux7+gOnhIDw4GUh1wcXmGWdoYubEISVDpeohUUX4Ev5ET10EoTq  
kWtqCXSusDxnhWdgEoQTfyIHH6i6Aj58eEiOQQC2VUZXTra6wibfl+ecM/xg

fEX84JkXrqD+Olzy6SifVOEzTktOuEJT8zu+gbt8YPZJ1UpjyxUmQ2jH1GT4  
4G5UU7e3ghsEUlzoFvxvxt0jEqmj1Q2WbM99FDfihubptbr+F24wria84vn9  
JDDQGrwYnXADHtXw6Z20k/DInGZvbssNUiPUeOj7uYB5PditiKI7qEj8WFG/  
wAk9opaK9m3ugFvNX31UcxxOmDeZewy4gzT+6ryE1XHwiTziGzTpDm+svxW2  
0x8HroG+W2nb7rCrL/z+rx7BLnJH25QvAJ8g+wn76kcA6FyjhnK9itw5mtD  
7QkOVoh6Ebx96OUVEM56Jnj8PQuMro2wsX+4AiB5ivFXAQvEYhk6Iv+uwImP  
fpFynCzwfmq70fQ/DwjsnA26efYoZByfSr7V7gGhmedGBN4ywVbO/BPHlx7g  
8jHxFKcPE7jT/vrD98EDnv42ee5GzwQafw66lm17wGPzG0ktOAwUb+Q0SxQ8  
4Za9OHNU9yEIziHSFjzyhJYASSPfHXqYpbmBLPo8IcxFMOZHDT2YRt8JOTbu  
CXlh+CcJFvQg4dU9R9zwhBOLw06zzXSwpLPai5fxArML3PT8MbRgT6OXmtHk  
BZNfmLRTMGoYirLo1HnqBRMziU8m/x0A5d8Of+nfeIFTn2bG0dYDwPk1zC11  
3QtEbbvYOGUPwNuuKq0kSW/w8D5KUI0kAt0oKvqY+97w7usvUqk7BbT+OgzK  
nd4wpz042SdJAWc90cJ2hrzh8ft3zcZ/9zGaixILESveEGUmwsFweh/rkrPr  
DxXzAYOEINpPGbuYzk/WNP9aH8h8HxIkWriNDZp9H+Fr84FXBIFXFTW2Mcfm  
k1yj/T5wKPLXdb1fW1hOc0w93BzZ9o4bv2K6hS38VR/9xesL+Y/Zo7GTm1jR  
zmuukHxfqDmQ1vbgwx9MwpbSRajSFx6uXj2SUfAH632Cq3vX5At1A2McUuZ/  
sF8xV0FuxBcedZ7J2Hz9G6uKu4fbofEDhju9VvQjvzCKA4GWT8APtk9tvRb7  
+xPTazoUdUzbD46cl8wIdv7E8p0qyryN/ECRqtV7MPUnJvrs7SK3nR9kVZVs  
neT6iVkny0fFRPpB219lGpLOGtZlt1eGpfQDxjEZX4W0H9juo/znBU/8wA2n  
/pFb9Aem7X5+afWZH6w4pbbwjSxjn/rtpcre+AHdlMtOOM8yxpx9DnFTz/o  
dMi/ydi7hLkwpi91n/MHnWgJhzcaC1jdy4Q7LVL+4HYTBvp+zWMbGVee9//z  
B4kd/7aR8nks5aDfUrGeP/wtwp86Tj2PVdFaLoV6+s059Tu7FG++YQsUgkti  
tf6wm6fy58qNr5hEF88dgSZ/kC/79umY7VcsLPaEB1e7PxyzFbbc5PqK0e8d

WqJ/6Q/ldZsMhte/YML/1he/LvkDt8kjtqKz5jHn67FayIBwMZYxni87RPW  
2Nx2G48LAHMiX/V7w0/YdmDzlVTFALih4MNO820ay1yvXgzSDYBHUeeVM49N  
Y3dXcxaNPAIgs77ArjdlCvuxaLNIcycAlBurdTmqJjDZ2xa3dxoCQObGeQ03  
owksxt34yq/WADDM7WGc3HqPMc2rLc68CAB1x498PKbvMfFZkcX2xQDgPNTQ  
135kHP0b3lzwFw4EQr5emOTjMUyfkCz5WSIQ/NluKbVHjGFnNVkijOUDIZKV  
7imr4hg2c+/cofNagZAYGsJzpv0NZhxtj7bsHAjR9HF6eb2jmMTJZ/6uZYGw  
frNx2oJiBGMcNm57Wx0I98bPDt8ZGMYWEj9SadwPhFpWR70aq8NY2fcN4umO  
QFi7RhtZIDaMMbcLP5z5EAhHqMVM2AeGsDXr3O2Lx4Ngh9vzlOLnl9jg4ZNq  
AzxBcOATQ4Zs+kusprsmU0EoCESadT20cS8xe+GekydkgiBn7NIUaeoANrz5  
G701DYJoljixDvQCqy+4mGiUEwRvQnnSaKZ6sSy9+ZcdV4PgCsML50liL+a+  
H8gmXhIEIUeqlwj6vRivW3Yl490g+MnGb1LR9RzDy3b1vXgRBPzpbKf3Gp9h  
vm8FGdVpguEk/xKbckcPZiWZ8TWbMRgaHwWNySf1YJC90jbOGgz+sR0qC7o9  
GLPGoyue/MHASHHUYD3ZjdU3a/cRsGDYhcoWPcpubJ3omfA5nHy+9k6w3IcO  
bHL1tfW5+GC4Vb9I9yCyA+vRk5YMTgsGk7zw3IvcHRjxwO4n+oJg8OwkyB9x  
foJJB+YoSzQHA1vfjH37XjsWYtqwGbNCzl/a4STg2orZ1R0b7v8TDK8o2RZS  
jrdimgwR1Sy7wfCxoePAxxct2PEeVYUqQyGQ1G7121KyBWuRHGt6dTYEBqag  
TvrQI2yL+a/PSacQWO7ftRZeaMa+eF3SdPUIAU/mhfrA6mZsol+Tu94/BMYw  
C6cUt2asKC5tUC0uBIwciHXbi02Y4hqHiGdJCAgPOM1M/m3Eol4rfWsdDwH3  
UoyDINOAOShSWZV/CoFnZi19Q//qMc3KvoGM+RCwatjftVTjx2NNK2/9DcE  
eGd8tKjN6rEqIffIXfZQSPtseVR2sw57HU08qmIRChXyH736PtZizQtWScj2  
oVAcIL6nFFeLFZnx/D3qGgpMyn7Sy6drMWfh21NfgkNBOB/q7ILPHWxZRKM6  
6WoofPpAY7fEchvjF11S7h8LBa9UHZO23CqMruB+ff1UKLyxidLZU6vClimD  
T1+bDQWPZz72sFWJPRrfp/f4HQp/rhkZnrpWYvqjx8YOsYVBSbb47G/9Cixk

EjyMzMLgc3XkD2n1cuySBu1HuUthYLT4uvErbTkG9S+NeJ3CgPPvvoX9wE3s  
UIqFzM+AMLie07bQYnYTK5P0oiASwiDqUuhyqW8Z9iKtIP/dSBjYgD9WpSCV  
YKoLq3lyE2HAKk//3FiuBHuspZ1dOBNG/j8pXnj6oRiro91KvLgaBmPI2pL6  
bDFGSLroP80YDoTu73XZr4qwi3Hc+nNa4XB65PrlXp1C7M2nYC0to3BQCFPw  
v7NbgOljQ6o1FuHg3kXBH91YgKG9GAUPI3DgF/Lm/8pTgPFHzQitJIRD+Den  
BUeqfGwp9BblxpNwUPQPvtD5k4g5jf/bsXgeDhkjTXTQRMSmZM03Hw2GAz2f  
QWVSMBEb+kO9Gv4hnPz+qfM23iFgjYGuU7ub4XDy4E5XAwsBi/AVfkQjHQHF  
0+/Fi+zx2K+h+EbX/yIg8LKqvrYYHvMSn7zXpxoB3/TFM8T/5GJ2Pzlq0k0i  
YDtjIIZXPBdT9Vz00+wbAen/soUC67lxBrf7XsfuREDphJ58xrcMLO6t+4Fj  
jRHAHMYprZiRgW2o8RextUWA6hFBZV6JDOWL79U+1oEI0D5d1RETm461TUbw  
syxFQGT35eDjommYh6HmeyaRSCA6iz80aE3GZh7v+zDhliFPdykg2zcZszjX  
SsOkGAK8d049fULJmCq9qNRh3UiIiBtVPFWYhHH2HM055BEJqVPJ4fvJidiA  
zEc1+juR0JuwYdqZGY9BRf4kXWMkODr+OCxuHI89ZDH2p2uLBPIJ+Ti3Y/FY  
+WpPKe1AJAw/0VU/Xx6HRdyu2ajelvtPFY7kpcdiltxB9ylFokAqpnq21zIK  
K8sU06TERUEzSruf8zcSY9+em6JQjIjXHPU3SgojMapxawYK3Siw1K6si520  
wCbxmMvelSjoLX/X8SEsHMukPsT173YUaHIs9FvMhmBMXMXwtiEKFhl96w8W  
hmB4STHX+61RQKkubt6uH4KR7IwanF5Ewd7W7YDDrcFYcQtRa3AhCvh/f4s8  
UhKE1XmdDCo5Ew3G544LDuYGYBKJ966Fno+GjL9nz6+YBGCN11CniVw0KFmu  
9UyzBWCPeu0ZaLWiYdpZOp+3xB/r4q0s83Elx69kmE4+9MNGx8ReYZXRQHPC  
Ku8bhw9m/r1jneNeNHBr2n/Ke+CNvaM0PvG7ORqaqljM2abe2AfxAKeaZ9Gw  
3yclaYf3wmbTHm4xz0ZDolrj+RVOT2xDCRP6wh8D0/vhueDujowZDes9FokB  
kpJr7Dy707Z9xcE/HxcDmjllhZJeN2w/P/Gxrmom5Gb+CxMRdsPof/aZNjnE  
gDCfd4XNtgvGWWkcm1QWA22GIsCsBpwwifogsfHqGNC69DXmZZYTptle+EH4



fgw8+i4dRmHshAWMzMi9fkK2f3leuvHeERvY9Vvj+BADdLParN7rDliERZ7D  
/WOx8Gzehs1H0x7D0zw4QsUdC6ctHUJGW02xKq+JJ+YCsbCQoq9Q+fQyNprA  
x7mNiwXdUc8B/X07TOR+w6i6cSzcTrvq2JZki32gG1WbzliFvS5r3pfPLmLr  
LBs/RQmxMNI7zyHD/yJGz8NZFnstFn75MFIYnLqISUs77gjUxMIDs2Hm4Whr  
LMt+vdn3eSwYSXbfDdW0wkptDhKpKOKAtoPxbNkBC0zYkWup9kAc4EL46s92  
XsCa3cRULtDFweUTtRvjkRewgQCT1WqmOBi9Ws33YMMc20i7pmfAHQdXR5lu  
lm+YYYYPhKkLFeMgGPv85ganKWalulyDR3FgzvAssfCjCebwus4gXTUOji76  
MNrdNMGCfQUKInTjgPPGzWKNcyZyETcSsb0YB+8vTtipaRtjc8mmxvwRcfAp  
62bpYx0DbI3l2B/OmDio5lB1PDCvj23dGL/GmhAH202T2fnJ+hhjm81X6ow4  
UJC58CWnVw/DrbiGzF+Lg+tSbAomlrpYjEVk8d3WOHh+xID/Zb0WlvZVWaXy  
CZn/u9OPVu21sDw/irmS7jiYe0vo52PRwioyks/nvogD/wvdGjdCNbGBjtwe  
/4k4yL64l1pgqIGxn6lYkN2KA96SG3QtwmoYb7Nr9vndOMjwo77Ps6iKCasI  
485SxkPm4smCy7dVMaVLdZEcB+Mha+qOobOoKuaY28K0cyleWBUP2gspqWD3  
/w5Kd8vHQ1747rwlBYZR7b/nDIGKB29+w8XOUoRZ0H6jPQfxoEF1Z/oSQtgO  
2+57klY8lOnNJPLGK206OLFod4t4iFQZGQxgU8LmvLKfHwmKh7/xAcs7PggY  
YtC1umeh8cCQ6Xl9iUcBy46sLAIpJAftnbXisdfymHTGkytfe+Lh3SeVljxp  
eSy++sfhR3nxcE7EQdr2oBx28ouBhd39eGCXKLtb9lEa81u0xlib4sFi1y1p  
7bo09nTN5Wz/w3hYqBlTz7okjXnsR29LdsSDiObFzbsfpLCWk3WINK/i4aLO  
Q9/zczjMzJjp/u4SGc96B1GVRxKrsuMcdlijB/o2i8/2CxLYtotQK/s6Od/h  
Fp2zTRJYWRDKjNuKhztP/pFu60pgK3k+583pE6B8x2E4keo8ljE4FPpPMAGE  
oz4J2LOLYjaXMuv2hRMg50JtgZsPz2HiS1rfDogngFxV5chZq3PYKF23KaNs  
AnjsKhZulYpgnGpNYtyaCcAa0o7j/U8Yu91a8BW5JoBm71zNqTtCWIS2Oaea  
RwLsLbbnTdoIYfrjzCZaPglwtzPldQmzELb2073DKITsn/lAez5SEJOXiLpm

n5IAhKLCnBM2Alh/lb1RQlUC+EQKCFLq8mNFMtwpKXfi50e3+SsP8WNezyYe  
Z9QIQPVQKDPPEB/G/MVUhPgwAeYC9H4mXuDDLk1aCp6EyCg6abumDcvNkcU  
bn8+lwDqPoWPLZK4sRb+uZ8vlhLg1av5rQenuLGMhvKzQysJYEt1ddrj8UIM  
/DVX/ruNBIG4uuX2flsLC2Fg8p+nTQTs0kzuy0ROjCZ+XejgmUT4o7D2IWvk  
ODb9lbNyWyQRzD5G57yLP4491FQ7vSyeCArmN5dFpI5jroykU69IE0F294/6  
bCE71lsgc+KqZiL0pvrp4vyOYSI1YQf5XBNBM2pstEyPFbM7ejOVxSMRWoSf  
izIcYsVkg17QUPskQgTT0VD9lyzYnAln1XxwIvgb8BgbG7Jgms/bt+8mJ0Ki  
wYv/q020YrRte9/lKxOhmfLg1I0119g00uMhcjsRev7029ZMMmEPbxotcN1L  
BIso73mbQCbM1a1sdq85EUT0PimP1BzGetdVPj57lgi4h4ny3qcZye/P5CHj  
2URQct11qTA7iNl53dNXXUiEG849PtN79Jjs67cDUsuJwP4G2eBq6bE5klAf  
++9EMertZDpJR49p8vZ3Th1IgjZ9WbfrL2kxOrlDDe6nk8Bmqk3ZJ4ka08sW  
Hch+JgkekjZXrdSpMd2fKzLPRJKAab6XnpGGGsupHW07hUsCferg0a60Axp7  
b9Gzd5AETscZazmvUWFCB4Xfq9slwVhtx2rRBwpMe66oaN0hCSRudA+uVlFg  
Hk8ZbctckoD3s9XcYgAFVhe99vmfVxLkLQVQ9jJSYLLrj743RibBOF7Weyh3  
D2l80NznvZYEd2o/ikk2/0OuLS3dQ8Xk+ABr5TrbfyjtqkhSVFkSSFUEWMrR  
/0ODRkwH31cnwbWx5xx29tvI/NlbtlyHSbB96Zd248kt5HzPWWj3TRII+5j4  
Cz7dQcKZ7xbujCeBgMflzINRG6jGTbvW6kMSGHLPLw7KbKBIPIGJ5i9JkOas  
kDxX+wcF5f9S8PyZBKfzu++cKP+NEmMTDCaYkkeE5gc+erXkdCcxW2L5jSQac  
6qH27qB19Ey7z/sNezK4dgbLq8uul2oWxpxXPMlg7nP3X0f7T5RScXWoWzwZ  
WlJWhzWH11DGixqj04bjsDSYqrquulJExF9erjZNBtEQh/DKsR/oJeGHb4VF  
MsQUhPs3+/5AjDY4fKldMugORf4bub2Mclbahwk+ySD70WUkXuw7ymN9bRKZ  
kwyetq5UjT4LCBf20yGMkAzM27cN/3EtoNEp1oDg/GS48J+So+3APGKpsiL4  
liYD+9H7y7Yi84gk/2XUqS4ZLg/HLK9sfEOFtn/M9IeS4cy4frJa51ck33Pc

WWc0GSgrqN6HRH1FE0KKQZrvkqGmFn8mU/Er4lyLIcF0MkiPFAxot35BxQn0  
b6VXkgH/UpjjeddndKOay4KbKQW8lUOUrnz/hDJSUu+805oC/Z3tMYkpn1CQ  
y6+93GMpMMcXFz/N/wlpn35ZTcWdAvGDPIual6fRemnE1vy5FGiqmxUImJtC  
6vkTxY06KdCjwenXKjKJxIM1fnoapIamzClQv59AHOYNGoImKcDiFitoljKB  
Vo6mrxRYpcAVFQ/z9W/vUUG2PES7pUDzcn36fP04Wkoq+KqVnALVSmHsCoFv  
0ZjTAXnKdHL8gTuqIeffok5V36y2rBQl6GLqzFgeQyQKLRkxUgrEJCf7iV8Z  
Q8pRGykst8j+nYfiLF5vED7wgsjHrhSwu/GoafbqClow7Y7Jf5YCjw9uSjna  
jSBnSbE3Rv0poDF3X9v3zAhSWKWO6nmdAssat+Pr24fRF4/mV9XTKbBzM3AG  
9/41knFk9Q/YSYFe5ePudW8HkdCx74wcFKlgYbw7FRw1iNj7e2o6D6TC36/X  
JswEBtGGWMAM46FUCP2m+FM99CVq2Ro2quZlhZjmbf184QGklJcPiWbChol  
zgYvH/chUXXXgQTFVfGYPnVCJ7APcf9VdhVGqbC0EyhRIIdKH9mx+lIRokPMT  
z5guXe9FXWf1Dx81T4WbXsUD0WnPkXrXwWUN/1SQRz3su6lPkXTg59TloFS4  
vnbmm63eUyQo1HqaGJYKyw0rLZFHniLaLPdLM7Gp4CMpZjN3rQf1W/YNROSk  
gv+oIRX2qBvprSbdvl+bCrEsluYKLF1lqdxGw+J+KgzzxAitdXUi0QvSn3ca  
U8HowftD1XadiLH96wndNjley/++1pd0oKEU1bTZ/lSImsstqBN+gkx5KNw4  
5sj8zz+oVA1uQ91WacZHllLhz5+xa94n25AEkVmRZiUVGPOCJp4+a0VM9HyH  
f/5JhRcWy7uzJ1rRwE+Vpn6aNEDFr8RLhh4hleeJ+6GCaSD+Y7R/3+sBqt8/  
tOgtAZ0zGWapOIPEI8iadRJLA10DEc4r083o526ikojmTSwFedIpzJvRi2F  
z/XOaKTBS2D4Zc6TUjCi67wnXMAuFi6neq3bUA3qnLjB93TIGip9tzo6QbE  
9Pm4Z49XGmhb/BQvXapHyxfOorqgNPCijZAMjKhHNZjObHJSGrxkHcmp1LiP  
eFkzJWQq0mD7dE7k0tm7KNeAlfNcTRrcPCozLvSyFu2lXj/Ad5ecb6n9/Q2f  
WjS1U/uOsTkNfi/Z/5NpvYMK5wajZp+S8TK9ogixuY20tDG9IH5Ng4YWLxGR  
8SrU7zOzoTGfBqlt/HY8+CoUd7pRYHMPDer2eDKXdarQetaFOJv1NPjyYSiG

qasSvbtclCdImQ4vhvRyxB9WoGlakaqHPomw19Jqebi/HF1o+/fGnT8dYrOK  
46qzyxGT7ytKLqF0yP5geXHbrBzFvfezjRVLh/IIpaHuLzeRU+0jNm2ldGC8  
uRtWQn8TiZhoJE5Yp8NZ/pAtt/lS9JXmeEOmbTrw7Ou/e5haiorbFqaVHdJB  
njh9QFK4FDEJZCmWu6dDyLFy9uu+JejnxuhPj9B0wK+3x60dLEYtxfb2O6R0  
aM/rLflfw35m+By6grJ9x/yvZV2+hoSoaV+bF+cDqJHiMdOvCtExb7Vx5/f  
Sof++SfrHKgQxaquDGU3pgPBqH7DjKMAaS5EKp8aTof9SOKF31skFC0w18I7  
lg69yXoF7s0k9MA+Tpr/ftq0HP4s/8KXhAQmks4JzqTDQi4nAywSEeVANse5  
tXSwE6Jcyp8joMe1N/7IMmfAZYdxjWr6PPR7ns9fni0DKmu+eKYP49E5gYpl  
hRMZsPPzi5rkNTwqKq75qsSbAVdoo/88F8Wj00yGEVWJDCiTdCi3bc1BON+n  
9wyNM4BvuWujqTUTedRqCBubk/2PRbutL2eim/N9FSZGWGDka2EgQpuJm00H  
r5vbZ4BTgFWClGUG+mH8Nv2iXwYEN+uoKdOmoXrcvIsrPgNG9ENVvxFS0Cef  
K5/dSBngByHujtopiL32u82VwgxQ+E1bd3svGSWfXjPzKsuAb/d7UYJ3MnjK  
21IjqM8Af9G7boctkhD3BgNPzHAG0J1njYsyTUAXabdmvMYyIKzCxmiLPQEV  
ss/fuvQ+A8ztXB6iqXjElvdUWGEmAyhP6345fiUe0YdFyvvezYck1NDXTZlx  
6PfWd32PI5nwdUt0RnA2GuEYJo9Ys2bCGDR1JydGI1/O/lGt45kgIOqcyiUQ  
jZYUK6wET2WC5Ybf8oh7FJqJtHGeEc8EuXQn64H9CDS4OxhpYZgJhvufxGou  
hyEGpnakYZoJ1Vvtiy7MYUiL5zaltEUmzAT+dlboCUU9KDn1qF0mJFIMOrAJ  
h6KWWGXioHcmzE8dW1M+EIiqK0vuqGZngq+4qFTkXCD6crTYWzIvE2JP71+m  
rw5Ep/gzJHivZsIns7veIe6BqEjV9eFucSacf/v71/yPAIRP5OlpuZsJ5o6T  
Qs+oAlAkTe6E+GamsMyPb0eZ+CEqf0/MxOtMYOpcr/rF54cyOPfmk95kQsGW  
rCnFnC8qPO+9MTlJrgf+z/cbYr7oobUea+piJnRcsYmhGPBGP+/RGXyizYKi  
6ITHy3KeKEweM89gyAJxvsLitCUPRPE05JIMUxbl+jzxES31QEzvv13JPJYF  
jolht6PpPZAo1bMUOYEsmDkcGTG54I7cLOK6clWygEmbZkLwrStamXnUp6iR

BcOmPX4R+a4oxHN16Jt2FoRQXOUusnJFSXF2H/8zzgKup499zn1yQeV3lLbn  
7bLgpvXMpsgfZ/Rxb1MKorLguN/LbQ0VJ+ScLvHf99gs6A3LjYw/7ISWWd1V  
8xOz4AW377rupCPaPjtuVjyRBc7tPRFhwY7ohNkD78JrWYAbdbagbnRAZtX+  
1WsPs8Ag06AhXsseWbVa7yy1ZYH22a5yaQ57ZPdSxeRbRxYgPt5ljvHLYGP1  
6L+J3ixQenG4UFPgMkqQazR8+i4LJO5T/VB8ZYsa+tb/XN0g16POrvSf+SX0  
cGJSF7+dBU7fD65dY7iEHn/vuZGxlwU/rysan+++iPqPEHViabOBL2fQUETy  
IppxlCpxZ88GBRxb3xCXNTqyEKj+n2w2dJqjR8rHLRHb9qVrMorZMCpIxzsx  
YYE4GdVXzqNs0FB79/l4iQUSkmArFNDMhue6z693ClogFNb8/bBFNszNi6S/  
hgvIm/4PYSY4Gyqf00oNXTdDAZwf5yfDs6Fr4z8Hfw8zFCb6X0ltdDY8jNhq  
ea5ghpKMr869SM6G1vXEx6GTpqi4UEax6Wo2TM6lrrWeNkUvz4Z8Tn6QDU67  
b39GvzFGnA+qI5Ras0F9yW6qtM4YeahMsP56nA1Knrc/y2YYI4aLSpr2z8j+  
m2qbT1WNkW4mVa3im2yw0SpblQgwQv0/coJW17LhuCO707y/AToR0XW46nc2  
uV9Ryh4yBsidr3KZjMbigYt+zq39BHdqQsTL/azgb1y0uF9kj7SNOZCFUw5  
EPWcZze4Qg89a6ymsxbNgcTBvwLH6HQRGzZRdkQiBzZX6llT3+kg55cMir1S  
OVBUd514s0oHHZj19pL6Lwf06gZ3PtfWQarHpEcO6+aA4hs1lniSNuo07Srq  
ccuBmzKVO8FaWoiZel0q3DMH4uQTuGR4tZA9/vSr87454Pjd4F7AliaiuJ2y  
XxySAzRVvOV29zQRT0o7hybnwKhRB1c9pybqUJoQE72VA0ez7mRE0WsgtpIQ  
puGqHGg39T6uu6COPHZZVwPv5ID46abjdv3qiL3DsL69IQcWj5UtWKarI2/s  
GU6vKwfyGxeo05jU0UnV+3leH3OAdUJWEgXVUEC5/gmmzzlQ/uJFQsZBNdRP  
tbTzMJsD6+J/HUZ+qKKgpwJtW99zQKT7bQjP11X0Ur1IKX07B2wCM6Vq9VVR  
hFaySs3xXMhKF+iST1RBw9X8/PpcuTD2m3L0mKcKEqLvolrjyYUnhwVoxcxU  
0Gj/9IM5oVxYjGLSoxdQQcK6fpp90rnA30US59YP6L3+Jb05k1xwML9iH8AF  
SM5U8oJAVi7EnVCxZx5WRoyKsYnH8bmg55Lya+K2Mprhe9XAQMoFWzeS5ZEK

ZZT2053p5/VcCDg2Vd6qoIwm8WV9T2pzYWBmrH3tthKKeX1E0fJlLgT6qVYy  
lvyHTB/Zuuu+zoUctZvK3NH/oTM3avOV3+RC62+mpXTb/9Cwj9av0x9y4Vrk  
Qm7gqf8QH1Ps3bWlXJj5YpjsVa2IHIVCj2jQ4OGiWeezE30KSJ+ztArR4cFF  
sSg/6K4CkmV6rix/EA9OZwc6TxIU0KENFq9zh/HgeGv7rKGdAmp+Xtd/9Bge  
7iUMT97YlEc0LnPx0Wj4EC8B82IjebRmdZjivRAeqIJYn0ickEeT+tL1I2fx  
YKtY6be+L4fqpbOmn4niQVZe1p5xWA5ZUPP8VyuNB0tPx22KQDIUc+vC71B1  
PChqpn7j65NFj8xv3jPSxMOfjhBEapZFvTQ/XM9o46FnKX3cvlwWzbolTbzT  
w8Pjm7cb2GJl0a8Tw4Q6AzxsG0XPUfrIIqoBLv0UIzwE/KVSu2Ari/hEmzpk  
zPAgGtZ4UVFZFkl83As9fAEPGUG3Do6KySLI0ZX8ZoEHrH6s7wOPLLJb+3yL  
dBEPKlp1iZUssj7ppitlw0eTuS+4n36WwZFMYazq9vh4WHO1+nGeRIU1Myc  
/ssBD3dPHTxz4rUMuu1io/rSCQ/sVDMVxKcyqIW95l+5Cx7O17NSXmuRQf19  
v5oj3PAQ1p4qc650Bo2HYT6mV/CQ9uCUkkGFDJoTzjwj4omHL+c7maiuy6CN  
yXczlN54YHisU61PkEFsyj5mDX54oDOuO3o/QQadXmllTA/Aw1KE0fhgpAzC  
3aDptQ/CQ9/uFd2sYBmkYmwSKx+Ch7Men53XfGWQMWWJPHMYHgpMrvHueMig  
y40LP+fD8VCiERza6CqDfjykazsj8fBs3Mqj3UkGxbDFORdE4+HqtTPTIvYy  
KPv5S27fWDxcP/n887qtDCoOOT6uGY8H+3U2d38bGXT3jBOejxEPXne3PW5f  
kkHt7+t0NpLwoDNIPvtCtgfSt6mGUvCQwMo+ZEI+P6Go+bgYDQ9lX1n4+8n5  
Fr7nBUdn4OHctNTkAfj9f4s/il/IwkMdyWaNjoyH1lB4QTQHD82FfnbjZLzH  
9oNuUuPJeCPNeII9ZZBAfdFqTw8eLxeEJ71k0HSDoxszUQ8SAqyRZ4JlUFq  
LFavMq+S+TK1HlKNkUGmT2+lOBXgQYm7/a1sigxyDFrF/rtG5vdld5Q+Vwb5  
C/63xXKdrM815922QhkU9y6lcakYD7fH3xga35JBuamjnj2lePATEe9+Se5n  
qTyPYFEZHjgiLA0l2mXQvcUr0/7l5HmxklqL65dBj4seFOhU4EHBorKs650M  
eqlHacXRdY3TZ71+jcZNLmjz7BVjYcLmxNsHBsyaMtuNqqmFg/Pl49GmHDI

InpmCdm4e2S9He0/fkVUFp3ojly1vI+Hoc4rN+JBFsmeZnWka8JD4+6uWben  
LNIYs+P61IwHQv2joJUEWWSeFGfs4UM8900+u569LosC5IW0XNvwYPPdoHpo  
iDwPUy7VLo/xwHNVT714WRYdGUmnc+nAQ1HKZ5bmQ3LobttIn1MPHIIqDH1H  
DORQxP0/Z5ye4WGTypEw7SeHtCs40hx7yfwPpxzVuCqHvmU7aDsM4CEqLcxQ  
7Iscak5IrrEfJPM9l3jzIYM8Sgi9TW8/hlfqafblGml5xOPws99uFA+XKky5  
BrPkkZV0v17NJB5qf58039ZUQELClbcvTZH5tt/jYAxVQH+4Xxy8NE226a9W  
N1crIALd0QHrL+T+ePyy62JQRIOTZbqWS3hoGJSkjhxXRFh8l57pNh5Y9vo9  
1NKVEFPIbK3JDhl/2unbhG4lNOVBz2iyhweuoBZ+420IFGZuPGhElQfHyumv  
H/JWRo1nZvQNGPKA+CHJXdkSlAghfQntzjygsImzEeYBxMiFGSPFPPjwwZS3  
nUsVUbxKHeVSyoO60m/vhBRV0a+YYfMt5TzwCtvF3bBSRZNfHKybVfLAUSLg  
UcNVVVR9J8IRRCcPmFfcfgGzGIJVHAhit8oDiQRNLV5adRRmfeHaSnAeZJ74  
NFX+QwN5HSrlGgzNA/FQ7vqbhzTR5SdzJbFD8+DyQg5tlrAm0uQLK3eOzoNT  
PV0nTrloItbFotrJpDxYz7Ea4/ugierCZp70EvPghi9nS003FropIgwVV/Pg  
7qSm9PJHLUSa8u+JL8gDJv6qP/+2tFAkHOhtup4HgTorM1mS2kibXmi4sTwP  
hAb+/JYq1UZfCzy/lDbkwRqz+w+ipw6alPKgD2zKAz4b0fORiTpo+LW7uNaD  
PHBo3LBnu66DHtO5Rqy25JHfY0GLZi90UH6oPQt05UHPyPqnAT5dlMV6WZ6t  
Jw8OMPX9opbTRYn3be0WnuZB2YrhzU96ushv/uIdfB853xVjHp8gXaRreUH1  
81AeXPy49bOxSxfBLzP3B8N54DKmK/hgVBfJ5ZrmpI+S+3Vw97rmrC4S6D0a  
lHyXB3Z/L9Uw0eohTidDCtr3eeB9PGgB2PUQ876+00QE+T6VZ11bgnpoV1Y3  
IOEjuR7xX3M21PTQ71HtQotPeVCww31e1lQPLflodYh8zoO3hm6Pf13WQ++q  
1BnezOaBgPru+qdwPTSoqiZRPZcHCQYPNBIS9NDTaRWLyIU8QNumU7fz9FA9  
O1Z+ejkPTBnY+aFaD1U1Kvf//ZEHf99UReEa9FCJodLKy9U8IB3+7Z3Xpodl  
S4psZT/zQM9D6uXFP3ooI0VBMehXHiiVFF3JeqmH4vj17bX/5MFV68s8Am/0

UGiHbMrJv3kQa/qo49SkHvK5KHN3bTMPTv73/IT0jB5y3pAafbadB4Tev+yK  
c3roIgG3WbiTB/Q1euHm3/WQibgkj/deHtwhHDw5sKqHtAf0q6tQEKBIwW2s  
8JceQq7iHseoCLBnVBTasaGHpKnE8IsHyHba+0n5LT0kUnru4RMaAvQUWL6h  
+aeHeBVFpvLoCOB33kD29I4eOv7uLJXrQQKIH1h9n002mQLOnFU8RACB3gC8  
JtmmZhIyZDpMgNBzTDhtcvz2bYGGl0wEMJ7bIOSR869pnC56yEyAsduOabx/  
9dDcZ76uDBYCiAinzq+T8X2M5p2zYyPHHy9Kpl3TQ2Mcpxil2Anw9cyInDWZ  
38ADbhzdCQIUHnZ8s/BND3WZnLT6wEGAtsgEsaZPeujRD86Y+1wE8BR053r4  
Xg/VpXNUJHIT4N0T7YDVYT1UIXhiwPIUAc5sWtPZ9uuhom72tXN8BIhLHbm/  
06GH8myPsVOcjgDVqW8w2KyHYq6yONYIEUBC6pH/egm5XsGL4hVnCSB6av/b  
GTxZT+Zd/26IEGBF/RKnXbweusDmc7VAnACfkXBTt70eYvit7kiUIMB1Ymru  
oiEZ7xuu87k4AgidfsNFp6SHRIkv+lNkyfh+MUifYNVDXwLKribIEyDlwVc5  
2l1dVGAa6hijSL6vKeHD9DddRMUiuBOMCKDmtPxTvVkXTeDjzrtoEkCm1HYp  
X00X5fhZ7thrE+C1pmVkloAuUjcWf2GjSwB3sReZFtS6qP7IlKO5IQE+Pljh  
tO3SQSk5cvlqFgQlaT8fPyesg5R8mJwwKwLsX5osxlHqoHWDb+f/u0juz7E3  
4DuuJWwPE1/g7AgQ7BbodC1eG0lnrezwuRJA7KHBIvMrLbTk+fwFtzsBXglV  
nREu1UI39IrzOTwIQLf0NoTgo4UYDulKHPUhwJM/hqYuh7XQ5/RKJ4oQApgd  
qNdyU9NEOak2A9PJBLDdC4p6SFRHiwkDBdcrCeB/WxVvPgXo2anelOBqALS9  
aM5nLAdU+rg72Og2AWayry+nuAEy32gxO3CPAJnL0ypFXzHUcaX6iGczWf+r  
Bc/f0CFENE5KVXxKAJMgR3pvFUWkzINCJ2YIwGzyk968FIdOtCu4Nn0hAIf3  
ed0SARxat5S5kD1LgGKO6UG2WklUkyqpbJAgIFD0wO3WiQQCw3Xas0qAWK9  
lc/fvSeG5r//dQ3bI0AMdvelnbYQ6kn7dcGUgghB3JKdDZcFUbHgqrooFRG6  
nHneM4QJINPLc/wzNESg2H/zZauWHz0eHZvWOkYELD0jvwU1HpTX2mBx/CQR  
ODYPF5jcYEYiRcnLJ3iIsHmide1iw2H0LMI6gZOXCL0H3okwyTKgzf8o67gF



iFB09KsAddgBRDj5Vu2UEBF+i0QHxZWlQKK7NR08Z4lQv/j2QQzrtrJ9hzGN  
gCgRargsxBe6vytvlwpcFxQnwt1jP6+6HJtRJsVuSpyRIJ9nuWM1z/5UuR/K  
bESkiTCdKVde0TLzxJEvaP2cLBFWJM+d5P6y9GSHUjtNTJ4IElYneAVN15+c  
f7rajKFEhKROPPWZoH9P+m891cEhIghENsoFN+4/cUwq+CQFRJiqLor6+YGy  
Y8fZM1hGlQg2xY9q8roPdORrYIfk1InwUfASY2A6TYeEEOtNeU0iqGrV31rB  
0XUM0M7LKmoTwYzmi5DtE/o05/m2wf90ibDkzGV4/CxDx15fjqOyPhHeeKSO  
BAcc6iiscdxEhmQ/l8mVkeuMHbh02RwwJsJ01K1XCbcOdwxeYRBQNSXzI9x+  
+CWNqcNVd7pVzZwIro45Uzp6RzoozjUaaVgQwXkt6i/z0pGOokMp3zStiPCO  
d/iYNo65Q3rZOIL7lhEy7uVtMNSyd7waFDuqa00E+2UnipmCmTtc71FW69kR  
YSAq4u6PcOYOipy3Sgb2RJB/Nph40ZO5o8jn9qihlxFstwRiKHXI+Yyi3Y2d  
iVBeWvg3h4W5Y+i8yZ6JKxFmvCIK7XKpDLgzC5LM3InglGjcz3M1EH1c1P4  
ggcRynKmV5rmDncUjwx2WngRwSvDiDFilLFDtrHsgpUPEfjhhrr6CYc6hglB  
3639iLDhm/JsU4ihwyNQ0/5SABHsnMpfO+bQd1CbnzXuG0TOZ2tQdLmftqNU  
eu2uXQgRCE6NU1pj1B3yx56p2ocRgSZixzCogarD852nj1MUEfoD4L3j5r8n  
1I8wapcYsr54/qhyHv37pLSAtcg1jghnCQ8nKpjWn4xatT+/kkSeh+4zqwab  
008UPzBw+2URgTnn1QPWke/KB2duv4wqJkKhury4NSUTqrojRRNcSgQLIR1d  
xSBmpBr8BHmXkfEctLxyd+EoimIYabCtIELFRDDP5CgbWpPeLEB3iSAT5DhY  
Vs6JsvfjR2TriPDUREGzgpUkEhk4dOh8PRFGPzUQ7iRwI+fLp2JONZP1phj0  
/bMoL3qfrulM8ZglppJ0igd+8qNg8+GSzSdEYH+tG8xWchqxnLo4vtZJBMd7  
mMGwpgDSb/bW/fyUCM2XfyxfJQiizmmSRM9LiQzRidyIpD2LbG7zeLS9IsIP  
9heB1NfPos3AmluNr4ngNxR+YuycMMIdfMx+6w0RSry6vl9VEUFVUI93Ej8Q  
4dR+WwkdJorU9rxkoz4SwSizpLGjRRTN9G/4Bn0iAt+Fvc+VEmKI047hq/NX  
sl6bkiKHOCVRTprkC43vZH7stfQi4+fRObN2KvSDCKK0avURvBKon1tDSXaV

CAkNrebq5hKIqsnqvtAvIrwon4+6Qt5vwR9jr9L9I8eLvaDUCJBELDUHX+/v  
EMHSM1GYVCKJ6gKI9Jt7ROD+zixD7JNEC3TVkQtUJHjUpvsj5TgOJY9KPJih  
JsFczguSjzIO8Ze0rbynJYF+XdexZQccssENObxgIEHZ+ONrOVU4tLVjeb2b  
kQR7LqSCql4cyu/7PNbKRllg7XRnxW84JEXwZGpkJoFSN3WMGpUUGrb5o3WH  
hQTZLH407dxSyPtMbHw5GwluxEhnXZeTQgZr9O1F7CS4q9Ue+dFICqmnnpTP  
5CQBaaU51CtSctEeeZnucJIEKkEHk3yzpVB/fvg3OR4S3GkXvverRApl8JxV  
YeIlwewl1ZFfd6WQftW74lk+EtB/jq32aJNCTOLJm22nSSAyzjRv2kvG80DK  
PE+QBE4DXFrVw1KIoPzlvtsZEvRpvolxnJBCZs/xh5AwCTzeO2jEzkgHNgPM  
je0cCdwP/TbZ/CaF3o396FkSjcGk58NL/YtSqNCmmKdbnAQjyW85lr5LoYuz  
uhEFEiRw+RatZrUshU56bb31xpH5sU/lHib7p39VS6pLk+Bx5cmH1AtSqCzS  
IptTlgSSA/SaJl+lKOMBmsU1ORLc8iTeHf8ohQQym9T7FEgg3l8z/XZcCs2x  
OJaV/EeClyVTd0xHpJAHf6elLkaC5xUrel97pJDoHe8mXhUSsJr+fkLdLoVW  
JE8e+atKghovN+quRinkrxLee0uTBDenZ7VP3ZRCuBdn+CO0SRBdzz47XCCF  
fhu/izbWJUHOLHWOXl4UCrOXkkt1lIGhu4s2FiGF4mJ/3LK4QK43/vLqBrIf  
qnTF+6KWJBA4U1J4REMKUefqXjpgTYL4gzLPWRWlUFppNUu9DQmSq3u+bJ2W  
QrlPHOIPopPA9F9037+/OGSswfzxkwsJuCsfnj7/A4dYXnXIP3QjwZek+dCk  
L2R9TXGtOXqSwPFDnGr9Kxwq/ffW7nEACQbz2zYHyHq0T0xqIwSRQOrWx7uD  
JWT9HpJivxJcgpjX+a+EruLQLOGzPxZGgqX34clzWThUxYl/dSyCBE1RnLn7  
STjkXo6ElyNjcCyM8VvmNA6JiPxI6okm80372pAZgkPLDddnCmNjcm1DipHW  
D4fuKegq+caTQHYq9w6lBw75dG8WaCSSwK4o61KyMw5J6FT/4komgZ7jKx8F  
l8n/J8MXjNZTyPPw88F5uIRDzVbUtf1pJPCmZlhLssShkJlG2hsZJDhpbDr  
ZY5D8u40jsFZ5HrdZRXa8Gh7dUjHXo5JPjaviavaoxDj0M7OPjx5HITD6NW  
NslhZTWNk7wEEujOJhpuGeJQB9MgDw+JBJ8Va5kzyH5s0pTvZD4JjO57+F4i

x3dVTpzmLCTX8+CpEiNyhV/e6ETRSQI2Xyf6W6KQz1K82fZi8n74NxtsRoz  
HFkn9znHVkoCjrOyIOYLOPT8zW8xljISaHO/Nr1lgUOaNyIImMtJsKqg2eZo  
hUP9HIRSTBUksLdiLzG+iEM6sukyFUK+H3G+IePDQ4NUDLLM9SQ590KuqTT  
Dof0XuUr0t8hwUaBWqk6ed8MFnr094lAWcBz9d9JxwaOn90laqeBH74pX1e  
cr2N/jWoUzSSwHpxpz3DG4eGe+W19prIeuz4kYjzxyETQqfOzgMS+HS90uEM  
xqFRW0397UckMC65t68WjkNmWq8MN1tjsEBdWtBA7vfYbzOTjXay3quvH3BJ  
wKHxTAeL9U4SRF4I560k68XKcsFqrZsEwd2mD2QIODTJ73tp5SkJVgTwc6yF  
ODTVGmW/1EeCjtzWua4KHLJNPuC08IIEQ380rxFrcWjaOMNI7iUJ+pnb69sb  
cWhmvsDjy2sSf00ffMvag0MOTTzeMyMk6Aqr6tMawKEvMZW+029IsAY2c+9H  
yfo91hQ0OU6Cnm+9AZzk/eryWSH0/QS5PnwLz4ZWcGjublf4uw9kPWbdOLSw  
iUOLakMxo5/I++6+p4oJE3k/HLkQP/yZBM3PLdgqOaTQ8uSHxKGvZD4v6itc  
BMn7wX8xbWceBIsXfj+XRIJo/QY1sWeVBL31WUkqwVlo0DPzatdPEry263ks  
mUTeD7IshR2/yHoMWlytJUqhjVenStr+kqAg357yd5MU+vdPsbpxnwTS09e7  
+rel/leRtcfVmHVhRhQSIYRJ1CR0TNSc95y3yyyLoRQlSYqU6CjdRE0hoqIR  
GsXsfbpJkqbbiMIoSSVUkpQupnTTZfokKt1QfXv+fP541+VZz7P23r8Xj8r  
TL01meCFL8Ztr2YJYfzSxoybUwhWj3q2uagJYZKW9e00aYIu9geMDE2FIGVz  
6EHibIKXotJKIFEIaS0qLYHyBBdmtVka/S0EC7cSqV2KBB3KPXYm5UKIO7bY  
XFGZxfvYM7J9SAjCKy9aQlQJqrnHu04z5cC5bcU05x8Jnhs1aez7wIGse43W  
2IUevRpeWn6aLIKsgVNBfukQzPfeL/dcSQTjUvVRNUKCvolrLWR/FgFdFiow  
MiQ4Fn09KTBMBE892iyWbSKYknxNUzBfDB6D4b90MWPxjns7Ny8Xg0KgXkyz  
OevnvzDjJ0x2F+MeCexJBi9xcB8va0Yhm+Dn8x0gm989D18iRji9f8X076L  
40hAulr6dTGSf0weFewmeDX75aSzt8UQ8bpH5qgjwQ1NV8SCcjEsH46J7d5P  
8JGtK2v9NzFUnDQqeHKA4Jwt/qaTZXjwlelvv+ZBcPNuFfN8BR4KFpho7/Qm

KLp9Ieu9Jg8uiZ8tRYcJ6n+YHbljNQ+yygR/BV+C9drkvLkeDzaGwwVI/gQj  
MpUqX5vwMF6c2JF8lODkjhKJw1YekszMZ4QEEMyV7fXzsOHBtHZU2+EEwX/V  
HFeO2vPwyf7GNoOTBO8uHveb4swD7bl4ohxE0GzyNaWwAzwYen+LGwgm2Fi4  
9NlvB3loG/mz8OVpguF2+03HfhgIC9rWmR5KsMFgfXKXPw+6n+/cDDxLUEH7  
IToG8NDoMs9/6zmCc8XtZ+IDeTjzxn+NxgWCI74+0VeDeNDe/EZ60Jxg09Sl  
V51081CXr19ZepFgq3R27odQHk7pxEXFRRJcHF032yCMhxVJY3sOXiaYXbe5  
aPN5HqrmOaxYRwjmtJYPqofzEBBW0DdXQnBLjXzFw9950PimltsVxfiprPFa  
FMFDhVdlcG4MwZi+qq9rI3nwb203DY8jGGr90EpwiYclVkaKe+KZnhY5uv3D  
cNnTPxt0EwiedHKJNL/Mg4/e9KSpiQSLTMKFZxlWyTjgUX+d4K73F/1+Y/ij  
arkw/QbTk+vygM0Me0X+OHbiT4ITDXNc6lg8ZamLTyxSCf7i0mXXcoYL/D6F  
/5B00HxZ7ok1rB637q3WQxkEDfU/9qmwehXsslVLbxLUyrdrKGD95FXM7Yq9  
RVD3Vd5uAevXea1fplcWwV8jS+PsGB9yd+r8194hKLvo5zwrxtD9TT2ce4/N  
49KrZsXfeHCMjpHp+pv5QW6tIbXPUP2W2VODsGuWxuKutg8sgN3R194QLCH  
Rpd8Y/Oy68t3dHhI8HXTkOMbNs+btUH9UoUE82TvNXb78rDD5F1uXRHBlE0L  
U1UP8TApb31IWjHBEIGVxUJPHiyvSc+1KCE4c2XiP+5OPHxVdGtULyMIHnGO  
hQ5Mn6FLSYPPCYonvKObd/Iw7B70xb5k9ZDIND8LHhKaesc8XzH/1Wx9/tGU  
6XerxVOsJjip9bVAdwMPcSLFHZ21BPe/mmmgyPyAk6OP6DQRTHW00maqykO3  
zxeUaiHobloWJK/Mw6XOXDPrWgkav7/YmTibh/bnqjHH09g+eZO/Y+kkpmea  
90BZD8H7d6YVZjSj2fth2umYXoKOT3SulNWIOTHAdbPnJ+avkMLP2czf2o5a  
bxU+E8w6MZZUnSOGKsGt8d1fCZY8mN/fHikG/bZuT5sxpKfPdykBoWK4HvXD  
W8sJ5q87/7bWHBOD71TJA+MpFG3so6bP3ScGpeYTR3RmUnx/t6RA9ycx2Fza  
1C/1PcVS2ynWadUiKNh4xnFCheLkGxF0rc9EsGliv3JUlaInnjRZlieCL+66  
mb3qFM9IfLI6k0QQu2GBR70WRR9Fh2JnfxE0jXR2pOtTzEzxmTqgJgKjzCXb

kw0ptoWRgh5lEWQ67yx0AlpHjnYUysuJ4FTVi0SyjuLB70+y279wojZxx+Gk  
KcVfmusVWmo50Le3t+LoZpbvlPxj5wo0+ucvB19zipsu2vdpPOWg6Eysipl  
xWaNFe3W9zj2Hgx+Y7mT4vBxzc7caA7Klfl2mtlRnF6XYgqXOeDKB/82tqd4  
c2yp8/RwDqbpvVHDvRRNW6bUnwjiwOtl4lSxE0VpoX2+1nEO6m40+uq4UHwX  
kuyn6c9BioLFNs0DFCOMPx+R9+JgTmlY0RIPiprbBiykDnBw9ORjne+9KLqe  
q55n5sJBGzeWoORNUT8nMvLDXg5Me0Rz5hymGJSudbbLgYOsRO+TM3wpqv4Y  
W2i4m4OFtmm9Un4UB6e3SH3cyUHw7PbdE/4Uu2YNzZ9ky8H7J4tejB6lWFmr  
E3hoBwdH9I7bVwVQFHT31wutWT9//fMx7QRFE7dD/vO2c3B5iV5QyEmK/T0l  
lfOsOFjyh0TBLohi33QlO9E2Dm5KD10XhlCUtT4U8aslBwYBVtysMxRnu462  
v97KQulv1t00UIqFVSWVvgxb75W3yT/L9KP9tWzQggNvk4pjBy9QfDF7+Gkc  
w+dXn7+yJlLit79Li18wPD+pW3s0kqJR+NmKhez7ZOWNBa8uU3xUs6X9PMM/  
nU/emkYorlpmYKrG8heMS70LilC0V3bxb2DY/PA+313RFJUNe9pyWb0NHVVT  
hbEU1QXdUwpYP/ttl0hkr1A0PnZk63vW71B54PKOeIoWj+6u+5nxE4Jvcx4m  
UJwWkWd+z4bN647BjppIUSc4pcea8Ru/LKbRK4linlBcXmzHgSB2xNM4mels  
9fjcOfYc3JfbMbE4heKWrr031//2vNQq+GzGSSnGlmY+zF5tn9aCi+qt0im5/  
+dU1OHGwx+1wdupfFKtuSyX7uHLQ21i5PjiT4upP/EYR00eAxaranbeZfse1  
OQ1PDqi4Z2TmXYpvWyqeh/hwoJFueq79HsXOlSx9Q34c3FZN/f7hfYovpQvV  
6TGm56ku4JXH8qm19dsHc2B7tPilUT7FtDUr+s+GctDZo+64ulDipwa5wdZz  
HEX+3RxS+ZjirY4f2tT/4OB3Y1BKfUIxN/Bc7kzmD5UHcclBzyh+7Bk7vDSe  
A1Gibanuc6aPq0f3fEjhwMO7Wo5UUXQvKhE2FnAw+k4nwfM1xTsuMXNtn3EQ  
uiNCx6iWosfv28NnMH9eAzOr4TcUtz8aWjqrkYNa2WfRtq0Ue2W6v1xh/nY6  
tVSg+47iPa2ZqeXfiaBvlCRvRgdF3cCBlJ9mikC2AZsf/Mv2g/yZYxkqllib  
mquh+omixqZb7tbrRHD/qnTGj/0Us6TiFgabiWA1tfrp588UT8fEZYzYiEA1

pHet3QjFousxc0q92b6yU3eImSRBKUH+sAzvV4e2HexM/U6CZcWnm67cFsG/  
JnmeOVISpOWNNcGPRFArsj5eLyPBZQcnLqxpZPfBOeei58lL0Gl8nSFdIIYV  
0nVLNBUIGD0t9OnDFWJIGPshhVOSYLzc7ov6+mL4/X8P71kktOCAi+chkZ0Y  
3Iv7qi+pSdj9ZF+USZIYNI7Yys3WleALo1/cvdj5EuuVTFSFExQO3hKvlud  
x84DKtoiCSaHZa7a8995ZxkuMNOXYHXiUG9VPA9vBYUbz6+T4HfXdQf0xtl9  
qnl5iPQ2VI9hYYbOUz2YVfvrDOXtEmzSvq9xt1kPTpcXRWrुकKDwsXbjllE9  
OJxjl7BhlwQjrjRPf7xSH8wvRzwM2cfiF2sWefyhD0/C3q6/7CzBobmDzb43  
9cHwlFZ5oqsEV00rW3CmRB+0PIv/KXSX4ITMc9t73/Th2j75va88Jbg0Z35c  
9TwDmL/TvrvloAQDjW8d7lttABEW6d6fDknQPiTxx66xNBiBtPDI84cP4MZi0  
fZmzAfwfOJFL0g==

"}],

{RGBColor[0.880722, 0.611041, 0.142051], AbsoluteThickness[1.6], Opacity[1.],  
LineBox[CompressedData["

1:eJwV13k4Fe//BnCjblWSKJEiW1RkiSw3jqWyn3Psy9knUiK020X4FqlzKEIK  
Km2KTyhabWVJ2mTL0iZJVJTwm98fc831uuafmee5533PrGSFeXCFhYSEvpLH  
/5/Nx9/8CjCrstj4LPNL7ONqq95jH24OR3dbeYxn0k1+z0Vsg/Luq9HfrDw8  
3eUWvpZD66ApLSN62mqxvExLM18NE2P1IIPRC7DIlUpnlNIGSP2VtoiMVsat  
KwnPU9bbYLkvR6jTeQVk+QvvHzCyhUJ3V1/BcVUo5uwK1DShQNvCoEgsZBUS  
Zbummtfbw3m6a80rRQ2Uv6+TC5/ZjJOHDEx3RevBOvzFuvJkN+TrdZ9SY61F  
xIXTigajbrjYnflvtfM6HFu58gvdx1d+SO9+cfXQybsbluhpgdGZmzPi4YY  
oHqmQbG2jlpF90e02xWNMTavvezUCU8sUXjy7upRYwSUh9Sxv3pCKSw3/bCI  
CSyP2m5ea00F9RWUb6ajJnDSzOvU/OIF49jcmwX1ptg1U8wq1PWBrxXFZGe0  
BdrYfZo5iX5Ym6KTr//bAmPf1QYUn/tBuFVW9FeUJYREDLRSIfxREtj94kCU

FTrjeb244Y8Zy013KFWAKWVeduzTALgFvvTwqLRBT1m6oIj7EMwSHOYZ/rGB  
2Khxs4w4A+oXqyrITW0x/HNVvpoGA3++Fah2VNjCXOlwoyiTgcJDO0aCKiiQ  
22gy0NXGwM+8eWk77tjispT8lbnmOh5sM/CdcIeHsKivymVTDQMD0+uN3HA  
y+YPSnptTJzRbff6+Z8DcmRaeb9nmbC/d3b1gf8c8Xg2iXrUh4Wczo0PU8u3  
YAt35bb6aRYSZksiQ35tQZPjhadTsmYEqq3QcjLaCvHqCO3PamxYbxc9JlO+  
FaIXi44N07Ix9LfNn1/mhPD8LZ+rj7Gxadn2yf03XRAQ6SbrtJCDJ/1Ro5u/  
u2DoWabjjhUcOJXEff6u4wqJwti7fnocBJrz324qdMVkwM4vhY4cWN9gdAU7  
uiHtk6z08EE00G3p9+aYuCPIMYQ31MXBJaOsipc0d/Bu79TR/MzBt1x+WXGE  
05rSzCPMxjmIZp276nzdHRbDD5I/inORMv5fXu5qD1C7c9axDLi4It9/UH8x  
Fbsu2H3yiOFiZN+nvSIGVDwsVN+un8LFhp7hyDeuVDhuOTX47RgX9y5OhB5K  
p+JZcUmQ8Dkumk0WBDQK05ClKi9Z9JCLRXmLfPJUaQgb9mqJaeTCU0iRHmZJ  
wweXulembVz0NKxyIt9PQ3b5Dw36ey5GfTZaMH/Q4EWxbdSZ5sKwxslUUIaO  
7wE5VYoiPOxbZWskpkeH1qRY05AkD8JfnfWubaMj2D3/rrkiD3IH2cp/eumo  
+zSQc06fB+P8o9OZLZ6o11MbLw/ioaRwzLCFzH2T0JquMQ4PqsWeoVISXmCu  
setfGsKD1E2VzmRbLyxmXHXVjOTh/cPrFfsrvPDZZ/kF+xQe6HWLRu+88oLR  
t8TkznQenj6N1vw15oVFoWeT/DN5KG+35IfpeePRfbd3ark8pH1o2c0p9EZf  
ctGTlss8zH4xKDI33xsZ1dvZz67xEDnC7+/p8sblqMcz5aU8BE0Euvso+KDj  
r/w8z0oeDCW+r3XJ8MHLmGZqfT0PPboyQybRvghb++7WmT4eqPq7V0Zl+yIt  
NIY5e5CHBqM33rdu+uJG+76qfZ94uG15tl73qy+WVHU6KH3jldVtXdfKhh+2  
/TjvK5vgYZqW3RV4yA9eHy0GN/7lIcJnQi7vlB/ma63NvPGPhwDW/YQlr/xQ  
bi5Jj5pDwCDSISG1xR8Bc0fnEJIEivfeFjgS/uh/cWVr0nwCyw8ptCYn+WOO  
/s2Ik9IExA73Wgjd98ce6fsT2YsldAnCIH5tCEDeX5V60WUE3PPaPQzcA9Bg  
NiNSp0SgrsAkLWxnAChLeqwOKBMovTw7+eVSAA7kG26sVSVw+O6x1z3KgWgU

nRLu1CDwfWrPAb5FI07VtNG5WgS8zRmqLgGBqAmPGRvQJqBTvT6kOi8Q/ITS  
whpdAtnTijJR9wLxqGZAWGktgX8Wc8p0uwJRXGprH7qOQGtN2/RppSA47h2U  
GdEnsHG2spC6KQg+Om39KhsIFFoV0kj5BaHV1dbAzpBA5I0IrP2ngpC91awz  
wpjA/L4jx6/OZ0DvhecM3YwA5sxwUpczsED15SHjTQSiVkaYcHQZcj7HSV1g  
TqCH6dul5MSAQnT5o7MWBOQSWq5P+DFQMbz0M+SgGOhTXz7dgYuDeiXL7Ai  
16NfRyM9nYEc5XkB3iDwUfjsJ080A8yaedWjppjepyT2zKWFgvpdjQZw1AVfb  
IDMqdxk4FbReTdyGQBJ7KuzvU/K6mzorhXRFYpjN63cMsAu07Jsh/e38w0Jb  
QwwUNNQm77Al4Dn4rDJYkom200+RDRQCaSLIsFvGRL3Q/sR00vfVywJX6jBB  
z18f00n6J0VLf9qUCXVr9oSahQEtb7cjs1MxNESxLikA5JlX5f5MPHOYaYu  
n/TxoqRLmcFMnEtzcGkjXVc7uT90HzmHM1rK/5Ge+hDq7HiECdN7c5estCew  
fl7fCvVcJoaOeKVYkuZo0MdmLzHxlGO2ik46177xSWcFE5vvLZ/lkG7hWQju  
NDDxZnan8U7SwimlwdlvmfhkzX2/i7RJ8WrzsM9MXBNfLLeDdGh9rvTWSSaK  
JJMGWKQLPi3o0xBnoaSumudB+qVYwm1hRRZO320s3URaQut3co8mC27bba  
kLZ0DPGuMmGhaOv+8Sny/iO29ejwHVilGly3uJ10carHdLgXC3mlHW4XSHdd  
qmt1Jlj4pR9XE0ZattGsUHsPC36DayKMSnt9uR4pmsLClHF33C9yffdLqDn0  
8V4cct15gbp69qCpdUXWbB9UPqPQ1oxJLYmso6FL5evPqkh988pbTzT7TUL  
77P23WKTjr9CsHU/svBDLT94LumhIVfxQVE2mlGeBzeQ+2//88vXm4vZWJaR  
cuIZmZ/C6cTWQ2SvHV9lxwgi7SdbwVewZmNST8x5P5m3JiPV1VsPslG2OPxH  
DJlXLasqccV0Nu71G6r/JvOc5EgbHsxlozlBOzKYtIVf6u2YO2RPbnDKp5D5  
vx43an1rjOzJ1q+HWkwJSKalrY6dw8Hi735TmqR52eoSTrIcXAjaOHloI4EV  
F72ffYB70Tau+fQKEwKZzx4ELg3m4HBL+l0z8n2MWJJ1IK6XA+fsoeYOPXL/  
V6wJch7hgFott0WItI52rc2yaQ4WjCV/VSPnwcCmPxJly7iY+7nhMUuHAI3J  
zPlE5yL+qf/z++R8Mb6qX+7SxMVCZ3WpWRUCf61fjCwn5/KpW++iGhcQcAte



K6HZyMNqBXOLDHL+XcxMU9Pv4MFt6b42JykC1F4bb7s/PKzoHYupFydw9eDt  
hzvI5+pu6n10fi6BwDsnTtRUEniUpxo/M8nDI10vM0bVNITwteu295P9odCV  
fP5uCAq+Sz71JfvBaLwyNbxkJ1RcuSxdRx64848MPVwTjq2DFNmiPi529Ux+  
DtfejUc+Ud/PhnMR9mr1fIpoFEKuxRt0SHBxsNX8Q+WbaFx9EBudUMRBY6qA  
/7ptL1ozHk/GmnEgSdwIlb+yH0IFFzNj37KRLiKLNHX5IOJlYzJcd5G5KHKL  
TSqIgtZrFfJ+Phsu5doiOWZxcJafQ4TeZOHGRJPhw43x+E972mbchYW0ppY9  
U6sT0KD+VvrxLyZE48c0JDQTQTmqfU1cwISYiVTpNrUk2OVHdH/bxERibIjz  
h3Qy9m5Hcu5nBs4WK3kqSx9GhblHk1gmA0YsufCIf4fBbRBW+2PJgleKELH0  
YwpeOe/Rn9cfBJkq6cbSgVSEBsh165oHwf7zAYsVz4/A6kkuJ+JCIJR/S6rE  
PE8j86FujLmBOCB6rGNtUzrGFcdauC0A1OLw4tH/MsCxO/pi1zt/PNOK7ksu  
/x98pYf0ymz9UWPead7/iiY1NENtZV+MPHQp6tnHMNkTOkSJS/XPp/7mH  
kokTP5Dws9gXEZ+sHXhVmXjKy36RsMX85Ws3CzNslAZvNDy3BkfdAi29+eX  
ZuFnrc00IKoPYk4uYl3SOA4RYec7NsXe+JLwVHC66DjOKDDzWjS8kVVZ6qmw  
PBv2Vvwah1lvSLy//OxgXjZ+yMB2l6EXKcNl16Yv04G3S9mVjHueuLenZumq  
zBN44RKhneXiCRHv8LuFMicxzH3z5HUHHUfiqR9LDp9Es0S5tUgYHS/W3Jwj  
mDoJs5lvdHtxOr7WKjf/2cdHhnR8799TNFhfrlJXGeXD03R8dMaYhoqzYlf1  
xvg4UvXwBcWIhvV82gaLn3xM6Xu+S9tAg0riiLX/JB9+i5/4Kqyn4a//qqBT  
QgIoL/dRNdCm4ZZsWu6ShQLseZ99d6cSDep7faRIDAToSLisJCJEw+mdF0+q  
GAoQ8HHshssM+T/DHV++1liA37WngnP/USHk8b81zmYCqEj+cVr3h4ruNQ8d  
020EePL6RLv/GBX8Xq1EMaoAgVm87ppBKha8jpJUoAtwIXFhndQAFUINj710  
vAQgP6jbfvuoikj0L7DzE+A0TTxovJsKl+zM6kS2AB8Daw103lBRe6Sbks0V  
4G1kOGXvKyrM43SaCgkBQs6u01DXTtoXOjifvHm4XIPPWKy/2cyrOsRey2nYI  
YOJ3Z7q0hQpF38Av78MEKMzJbxBqpiLTrWTXaLgA77akVrg+o0LMYXJidrcA

Q+7hzfmNVPwf23uN5Q==

"[]},

{RGBColor[0.560181, 0.691569, 0.194885], AbsoluteThickness[1.6], Opacity[1.],  
LineBox[CompressedData["

1:e]wV0Xc8FA4DBnBlj2gTERnZSUYK96jLyt6Rs7PdnXHoODIyzirjUkL6lUTS  
UqRyvRXelPETKUQlqy6haPH2/vF8ns/3j+evR86X7BCwmouLq+xv/t+G8wNf  
qWJchEzLpid1jmqEt/njDZ9owwROkFqU44wAktqlo+ponwnRu5We5z2RQNcH  
A6cc2h8Ct4cf3YSujMW5NmICbQ0Kk+XS/af1IfxT1CiaJg3W5p2EmH5TbHX3  
53pjuQ1pT/PJGbLmEB8eGqs8JQttzTTag6MWUDHSvsgfsh3bOgkW/504BOs/  
Q2ovJZTAUT033k2yQ3GitgGFpoGX3eEXRMecUK4xfEbeVxOva9gGk8HOuDSc  
8bvfeic0rr0iqH91xlA55235KS1oqjXy8/9yAWf5wAXeEG3oCPu05f12w/qH  
HJV/JfSw+n0/H6f5CDaLP35dl6eHhu6m++XqnpAilzJP8OhD0aZizepznIDY  
RvxsMKuPKo3Pil/jSdBLKm2obDPAoZrmUMp6b7gTiPoRNCOM60dHKZ33gWaG  
avmu70bwbeQWoPT5YHXXWt5vMcZwaC9qleD3RS1pu]ceQ4D/4+AdBSG+WDbe  
d4fYDJQ6zD6yV/WDHanPwaFpPziM/YIv8/yxN8WMT+fHfvTKhM+tavKHwqXm  
pk0GB+C49LOv7p0/fnyulB28ewAae+N9U3UCUJUyZvG6S0Tz/A6CX28AFsr4  
ssPvmKK3f80Z26WjGGmNN7jdNMU/dbk9MIKBaP/waVZL3wydto2f0owCcU79  
X9eFRjNUymrYSx0PhGlLhSK90Ryp7HX7WNxBOP1mDzvztiVG5ff9mPoehJSV  
2uiQb5bw28p+8HhDMMLktylb6R5Cw8dXOZZawTAJ5c0Xu30IihkqZzyCgjH9  
s+dIyS0rvN2I4et9wdgnGbp04aYNTATPrpWqCMHjdzGzFl9ssEXWWiv/dgis  
apMnv6jawmGS6Nj2LAQkw5JX+6psIZn/90qjxRCYXPMecja3w3hhMtPFKhT+  
PcyWVfr2WMcXqN8zE4rLuifv9jnZY05hZWBwORSfS0tuVUfa45txq9f1dWGG  
+Z6vs663h+3DpOguvTBkzDeWlSo6YHuCVfwAlwxXNr1L2LXREbMXNw8U8YWD  
Ez8Rx6PtiLXR00ldm8Oxe+RT9ICt1ijHpljSuFoubQYlsh0RFDzq5t5puF4

rr/Gs201E7YvqSxvSQvH7OE9Rj5fnTCsnBHruRQOvfK8PwUvXCAan+ea1h6B  
2qo5nRczLvi9ipli3xcB2WqXMGFBV5hQZop5RiMg3CDzJv2AK7p63lyVXozA  
KLv+7rG7rpisYT6TVyAje/xFlH+VG+T7gj+3xpOxMqVde/6hG4y82NfE0siI  
5pS8GxlyAx/17Lh5HhleiyT7w+KHof2xvo5eRYaO4BdNm5zDeHrQoH6qg4wR  
dbFpfZo7VIS5tfKFKHDcFSUXU+iO/nbRQQkxCtp1B9xunLijpXHiXOkGCm4a  
V7Spz7jjNBdzKnkrBZl2Oy/KeXtg8Vdb9pQGBdrRtt7ClkcQpOX0YY8tBSfu  
5fePSJNA0ujqS82h4MuvWHqJEQmb5Cz+8SigwM3QW9bGk4Rh9oYO4yIKVO9r  
hdwvl8Fnz85Ns2cp6HrQ8+eslBeyTHw1VtVSIDKWdapOxBu5ZfOXZ9socPnw  
rCIYyAcKu7ct5/6hIjsHOQclfRB773ZGCxcVDxVukeRUfVDbEOL5kZsK5YAy  
7kELHyhtDNihLkTFR/Ewa/MsHxCiPNuOb6aicmLNmJKALzKnH9700aRietpW  
4AOvH/5IPaXZeFBhujA107DRDxXupRm9nlRU/UntSpT3w+ubasOO3lR4rL1b  
Im7ih+wDy3E2AVR06soqHkrwQ9ijBRsFMhX1ybMmN+b8MFQ/tOSWQkXk5pP0  
5Lf+eNtSvl28moqfjr2crU1H4ecqS1aboSJbfCj9wr0QXCE85I6MiITuffMm  
tTYCG3vcV+14H4kAkaxpthoVQt6RzhqWUaCMLE1SVaKgO3Wt+9PtKJBfKooQ  
eWPA9Na+0y4ejYQuw/GmARoW3Q5UnI6JRkcmq6S/Jw65zwVcjQejIRR4LWzT  
IWPQq7aMc9b5u+MRlvpVk4CTL4u5JYpjIHnRLimtkoFbb/ivy8/FwOa2Cs/p  
vcn4PbyksMeMhmuLnTrsPceRwKbxNZynIbvzRewvxRR0qJZepS3QwHt8Tklw  
Ryruv76k62MVC3594etB8mkIrFFu4ITGIjUpXxpQNB3yahJDRE4sKqqlXKRF  
T6CoSHI0FnHQ9d1Ajfx9ApO+5rI3mHFwkOEK3PIxA3OFHWyRvjiINyt2FL7P  
xMwXnsrVcvEwnaQbbevOgjWMREMD4yH9XUiG0Z2N51FszT034kHnzR/U7GSi  
nrnrg/LPeDhWU6tnG3NwSLswen7fMTxTpo2l384F487RLR+PH8MDw0EN9Qt5  
CN7w7ekE+xj0HXY5K+Tkw6n/TkbsyjFcvuC8EEsswOMyqv8i6licMDE72lwA  
y9Gvx8cS6BCRIgtZ7z2J3wazxrktDlxnhb4rv34S6aOsR/9+p4NRvN73stlp

lPcWUkc1EzCV8l/W2Yun0D1p/o0e8veHpusu4lsLkeNzg8p7PgGCozXPEsoK  
YWEYkjf/OgHEjK2aTMkimAlG+l9Zn4iW2AdbthcUwSoqaX/FwUTwuFHvVYkV  
l8fr2lAHPRFZxx0/1p4oxsFg9zseVxPRq9aw7PmrGALLL/oFhhMx80T6+Y/4  
Ejzg1g1qFWPApKZZQWa2BKtrPT4pGjNwt4K/TmOuBMjXnDfN/7VWidNuo4US  
GIS2q7cSGJBJ5ZgcWSpBkY7MDncTBn4e2e51hosFjYlbFrIEBm6szS7dvI4F  
4syI2awlAwpXh0XFtFm4FXxJu8aVgbMRI4pldFhonavUiHZjYH3A/FZNPRZC  
9xPFCYcZ4HLIVbPey4K6HrOxz52BYTW2OXM/C9sKiYorngyUvFVO5XdkgSHQ  
8tjOn4E1/TFC4s4sVIssXZEMYCCt89FJJVcWnt5YSPrw15FNRyoPerBw+qru  
99hABmwKC+6n+rFgtWplQ3kIA0+yhomFASyU1wRRAkMZMExW7awKZOFTTvk9  
rTAGVMMfv2aHsuDREy3zn3AGzvut8+0JZ2FaQklvJ4IBCxfS1CiZBfugXENn  
MgMFdrWUWSol7dr9u2QoDPCbLS2uRLGQPjO/aeKv/wdTNHKz

"]]]]},

AspectRatio->0.6180339887498948,

Axes->{True, True},

AxesLabel->{None, None},

AxesOrigin->{0, 0},

DisplayFunction->Identity,

Frame->{{False, False}, {False, False}},

FrameLabel->{{None, None}, {None, None}},

FrameTicks->{{Automatic, Automatic}, {Automatic, Automatic}},

GridLines->{None, None},

GridLinesStyle->Directive[GrayLevel[0.5, 0.4]],

Method->{}

PlotRange->{{0, 1650.0296}, {0, 525.7521813}},

PlotRangeClipping->True,

PlotRangePadding->{{Scaled[0.02], Scaled[0.02]}, {Scaled[0.02], Scaled[0.05]}},

Ticks->{Automatic, Automatic}] \) \!\(\\*

GraphicsBox[{{},

{RGBColor[0.368417, 0.506779, 0.709798], PointSize[0.6], AbsoluteThickness[1.6],  
EdgeForm[{GrayLevel[0], Opacity[0.3]}]},

{RGBColor[0.368417, 0.506779, 0.709798], PointSize[0.6], AbsoluteThickness[1.6],  
EdgeForm[{GrayLevel[0], Opacity[0.3]}], PointBox[NCache[{Scaled[{Rational[1, 2],  
Rational[1, 2]}]}, {Scaled[{0.5, 0.5}]}]}]}},

AspectRatio->Full,

BaselinePosition->(Scaled[0.1] -> Baseline),

ImagePadding->Automatic,

ImageSize->{10, 10},

PlotRangePadding->None] \) blood

\!\(\\*

GraphicsBox[{{},

{RGBColor[0.880722, 0.611041, 0.142051], PointSize[0.6], AbsoluteThickness[1.6],  
EdgeForm[{GrayLevel[0], Opacity[0.3]}]},

{RGBColor[0.880722, 0.611041, 0.142051], PointSize[0.6], AbsoluteThickness[1.6],  
EdgeForm[{GrayLevel[0], Opacity[0.3]}], PointBox[NCache[{Scaled[{Rational[1, 2],  
Rational[1, 2]}]}, {Scaled[{0.5, 0.5}]}]}]}},

AspectRatio->Full,

BaselinePosition->(Scaled[0.1] -> Baseline),

ImagePadding->Automatic,

ImageSize->{10, 10},

PlotRangePadding->None)\)      liver

\!\(\\*

GraphicsBox[{{,

{RGBColor[0.560181, 0.691569, 0.194885], PointSize[0.6], AbsoluteThickness[1.6],  
EdgeForm[{GrayLevel[0], Opacity[0.3]}]},

{RGBColor[0.560181, 0.691569, 0.194885], PointSize[0.6], AbsoluteThickness[1.6],  
EdgeForm[{GrayLevel[0], Opacity[0.3]}], PointBox[NCache[{Scaled[{Rational[1, 2],  
Rational[1, 2]}]}, {Scaled[{0.5, 0.5}]}]}]}],

AspectRatio->Full,

BaselinePosition->(Scaled[0.1] -> Baseline),

ImagePadding->Automatic,

ImageSize->{10, 10},

PlotRangePadding->None)\)      gi

(\*-----  
-----next mouse\*)

vn=readTac["C:\\Users\\exx\\Downloads\\TbAM3, Liver 2.789, GI 1.214625, ID  
3330.csv"];

Lv=2.789;

Gv=1.214625;



{GrayLevel[0.55], AbsoluteThickness[1.5], Opacity[1.],  
LineBox[{{9.09090909090909\*^-8, 9.090909090880112\*^-8},  
{0.0874367476365131, 0.08090369567458766}, {0.18222810297558026`,  
0.12746559200130417`}, {0.27073779576926765`, 0.1116266937044405},  
{0.3575112797365835, 0.046963725126600256`}, {0.4516394623155443, -  
0.04509050859182233}, {0.5394859823491253, -0.11115559892361665`},  
{0.6346872009943513, -0.12642564594664163`}, {0.7281522108132057, -  
0.07740196037964171}, {0.8153355580866803, 0.004179083230780074},  
{0.9098736039718, 0.08937493944143977}, {0.9999999090909091,  
0.12834702174618903`}}}],

{GrayLevel[0.55], AbsoluteThickness[1.5], Opacity[1.],  
LineBox[{{9.09090909090909\*^-8, 9.090909090875369\*^-8},  
{0.0874367476365131, 0.07984396759533968}, {0.18222810297558026`,  
0.11939549826670079`}, {0.27073779576926765`, 0.09184904274707059},  
{0.3575112797365835, 0.017913117173780694`}, {0.4516394623155443, -  
0.07109962300031061}, {0.5394859823491253, -0.11717052830989395`},  
{0.6346872009943513, -0.09879571259704382}, {0.7281522108132057, -  
0.022693471356141894`}, {0.8153355580866803, 0.06128703302641453},  
{0.9098736039718, 0.11605625481609519`}, {0.9999999090909091,  
0.10415981267620744`}}}],

{GrayLevel[0.55], AbsoluteThickness[1.5], Opacity[1.],  
LineBox[{{9.09090909090909\*^-8, 9.090909090870287\*^-8},  
{0.0874367476365131, 0.07879243663407876}, {0.18222810297558026`,  
0.1116081822210312}, {0.27073779576926765`, 0.07372482040530459},  
{0.3575112797365835, -0.006267252216927747}, {0.4516394623155443, -  
0.08743897872291118}, {0.5394859823491253, -0.11109134853087661`},  
{0.6346872009943513, -0.06371549528296311}, {0.7281522108132057,  
0.02544576624054603}, {0.8153355580866803, 0.09464282937855747},  
{0.9098736039718, 0.10731931496853601`}, {0.9999999090909091,  
0.0516787429232188}}}],

{GrayLevel[0.55], AbsoluteThickness[1.5], Opacity[1.],  
LineBox[{{9.09090909090909\*^-8, 9.090909090865543\*^-8},  
{0.0874367476365131, 0.07774905743802465}, {0.18222810297558026`,  
0.10409673959866513`}, {0.27073779576926765`, 0.05716133039337165},  
{0.3575112797365835, -0.026084496726167965`}, {0.4516394623155443, -  
0.09591154799603378}, {0.5394859823491253, -0.09685594593277226},  
{0.6346872009943513, -0.02730376120671303}, {0.7281522108132057,  
0.061646715198529656`}, {0.8153355580866803, 0.1046634148537508},  
{0.9098736039718, 0.07509702498429204}, {0.9999999090909091, -  
0.006536873471333553}}}],



```
{GrayLevel[0.55], AbsoluteThickness[1.5], Opacity[1.],  
LineBox[{{9.09090909090909*^-8, 9.0909090908608*^-8},  
{0.0874367476365131, 0.07671378556951527}, {0.18222810297558026`,  
0.09685439581479163}, {0.27073779576926765`, 0.042069810325321415`},  
{0.3575112797365835, -0.042006785469922474`}, {0.4516394623155443, -  
0.09808544986431629}, {0.5394859823491253, -0.07760167026270944},  
{0.6346872009943513, 0.0063643674428021085`}, {0.7281522108132057,  
0.08405712128907425}, {0.8153355580866803, 0.09555213349985489},  
{0.9098736039718, 0.03202960165577907}, {0.9999999090909091, -  
0.054402034659985464`}}]}],
```

AspectRatio->1,

Axes->{False, False},

AxesLabel->{None, None},

AxesOrigin->{0, 0},

Background->GrayLevel[0.93],

BaseStyle->{FontFamily -> "Arial"},

DisplayFunction->Identity,

Frame->{{True, True}, {True, True}},

FrameLabel->{{None, None}, {None, None}},

FrameStyle->Directive[Thickness[Tiny], GrayLevel[0.7]],

FrameTicks->{{None, None}, {None, None}},

GridLines->{None, None},

GridLinesStyle->Directive[GrayLevel[0.5, 0.4]],

ImageSize->{Automatic, 28.4375},

LabelStyle->{FontFamily -> "Arial"},

Method->{"ScalingFunctions" -> None},

PlotRange->{All, All},

PlotRangeClipping->True,

PlotRangePadding->{Automatic, Automatic},

Ticks->{Automatic, Automatic}] \) Expression: {Bl,Li,G}

Parameters: {k1,k2,k3,k4,k5,k6}

]

```
Manipulate[Show[ListPlot[vn[[1]],PlotRange->Full,PlotLegends-  
>{"blood","liver","gi"}],Plot[Through[model[k1,k2,k3,k4,k5,k6][t]],{t,0,1500},PlotRa  
nge->Full,PlotLegends-  
>{"Blood","Liver","Gi"}]],{k1,0.001,0.2},{k2,0.0001,0.1},{k3,1.*^-  
6,0.01},{k4,0.001,0.2},{k5,0.0001,0.01},{k6,0.0001,0.01}]
```

```
Manipulate[Show[ListPlot[vn[[1]], PlotRange -> Full,
```

```
PlotLegends -> {"blood", "liver", "gi"}],
```

```
Plot[Through[model[k1, k2, k3, k4, k5, k6][t]], {t, 0, 1500},
```

```
PlotRange -> Full, PlotLegends -> {"Blood", "Liver", "Gi"}]],
```

```
{k1, 0.0032}, 0.001, 0.2}, {k2, 0.0001, 0.1},
```

```
{k3, 0.00205}, 1.*^-6, 0.01}, {k4, 0.001, 0.2},
```

```
{k5, 0.01}, 0.0001, 0.01}, {k6, 0.0001, 0.01}]
```

```
Clear[newmodel]
```

```
newmodel[k1_,k2_,k3_,k4_,k5_,k6_][i_,t_]:=Through[model[k1,k2,k3,k4,k5,k6][t],List  
[[i]]/;And@@NumericQ/@{k1,k2,k3,k4,k5,k6,i,t};
```

```
fit2=NonlinearModelFit[vn[[2]],{newmodel[k1,k2,k3,k4,k5,k6][i,t],{k1>=0},{k2>0},{  
k3>=0},{k4>=0},{k5>=0},{k6>=0}},{k1,0.003},{k2,0.001},{k3,0.002},{k4,0.001},{  
k5,0.01},{k6,0.0001}},{i,t}]
```

NonlinearModelFit::eit: The algorithm does not converge to the tolerance of 4.806217383937354<sup>-6</sup> in 500 iterations. The best estimated solution, with

feasibility residual, KKT residual, or complementary residual of {9.91228\*10^-12,0.00222027,2.24474\*10^-12}, is returned. >>

FittedModel[newmodel[0.0117614,5.86338\*10^-13,<<22>>,<<21>>,0.0289934,5.86338\*10^-13][i,t]]

{fit2["AdjustedRSquared"],fit2["AIC"]}

FittedModel::constr: The property values {AIC} assume an unconstrained model. The results for these properties may not be valid, particularly if the fitted parameters are near a constraint boundary. >>

{0.902852,861.061}

fit2["ParameterTable"]

FittedModel::constr: The property values {ParameterTable} assume an unconstrained model. The results for these properties may not be valid, particularly if the fitted parameters are near a constraint boundary. >>

|    | Estimate       | Standard Error | t-Statistic    | P-Value       |
|----|----------------|----------------|----------------|---------------|
| k1 | 0.0117614      | 0.00200114     | 5.87735        | 1.50787*10^-7 |
| k2 | 5.86338*10^-13 | 0.000871127    | 6.73079*10^-10 | 1             |
| k3 | 0.00142465     | 0.000410415    | 3.47125        | 0.000918459   |
| k4 | 0.00209053     | 0.000726948    | 2.87577        | 0.00542124    |
| k5 | 0.0289934      | 0.00408172     | 7.10324        | 1.06112*10^-9 |
| k6 | 5.86338*10^-13 | 0.000268767    | 2.18158*10^-9  | 1             |

Show[ListPlot[vn[[1]],PlotRange->Full,PlotLegends->{"blood","liver","gi"}],Plot[{fit2[1,t],fit2[2,t],fit2[3,t]},{t,0,1501},PlotRange->Full]

]

\\(\^\*

GraphicsBox[{{}}, {{}},

{RGBColor[0.368417, 0.506779, 0.709798], PointSize[0.016666666666666666`], AbsoluteThickness[1.6], PointBox[CompressedData["

1:e]xTTMoPSmViYGCQAGIQDQEqDk0r064Fvcx3gPDtHKyOdP5kTmmE8j0dauZk  
HjLjK4TwGwId7h9WPT5XMwPKD3OY3SA6LU8zGcqPdtgbzPh9T208h0+Q4HDv  
ksLug7nREP6BJIei49+2dm6IgMqnOujOm+y4aFioVD7d4Xzun4w9bSFQ+SyH  
zITKU5wrg6DyOQ48Aa2sEVsCofL5Dse3dhy17gqA8B8U0JjqHFJx7/WH8BWK  
HP67MM28/90Hwl9Q4nDo9ML6hw88IfyECodg3s9nXri6QdXXOCz0092S/80Z  
al69w1Z/rb6DTY4Q/oVGh1YZRRX2IAcIv6DdYZv+QdXrG6wg/IwJDrIGFhIq  
0aYQvsRUB4ub6n809xg6GB/ZqMd3YqZDjIewoWy7vgMA4k5ylA==

"]}],

{RGBColor[0.880722, 0.611041, 0.142051], PointSize[0.016666666666666666`], AbsoluteThickness[1.6], PointBox[CompressedData["

1:e]xTTMoPSmViYGCQAGIQDQEqDlq7EswWzfb3gPDtHK48crryeXsKlO/pcNx0  
ps+GJekQfkOgg/+0qPffE70h/DAH5viLa6fz5EH50Q47NY7k2u3Ph/AdEhwm  
695hvudTAOefSHIw4Nxx8a0OyndIddBYdcJoXSNMpt2h50wuD3clTD7Locpc  
TERNDSaf47CwY8HR3GiY+fkOJ9fce1hmC+U/KHD4s3dniUNtqHsUihyUXNc9  
ne8F5S8ocfCc9eTNoc4cCD+hwqHo+70WdcEsqPoah7XfQuOu10P9+6Deob/n  
6rP6iFQI/0Kjg3UxP6f82mQIv6Ddoa66V1i0Lx7Cz5jg8GRRlMuUlAgIX2Kq  
g0F2tdyF9hAH4yMb9fhOzHRY/r/IL+NfoAMAsUl2gg==

"]}],

{RGBColor[0.560181, 0.691569, 0.194885], PointSize[0.016666666666666666`], AbsoluteThickness[1.6], PointBox[CompressedData["

1:e]xTTMoPSmViYGCQAGIQDQEqDqtyd2/fv8zYAcK3czCYv0ZiXVkmIO/pMDn+  
q5nOsWQIvyHQobNVwG3RyjQoP8zBiePE9AtbMqD8alcZ3v5/NeKziHyHBAeh

tHpX5fwcCP9Ako0Hb8L9zc55UPIUh+l/d12u1SmAyqc7hF53e1gfWAIvz3LY  
NdkueatvEVQ+x+HJBleZOUzFUPI8h5nvpGauEQzIPyhWklmK6fi1vwTCVyh  
4GkUCtU7WwrhLyhx+Kde/10vqALCT6hwSHKTPbS3vhqqvsbh6Ifji72q6qDm  
1TvwZM7LjY9ugPAvNDronb9XIjapEclvaHeQnfotsUKuBcLPmOBw0rxBedq/  
NghfYqqD/MzNj3eHdjoYH9mox3dipoPFp6er+J510QAATvl2+g==

"[]}, {}, {}, {}, {}

{RGBColor[0.368417, 0.506779, 0.709798], AbsoluteThickness[1.6], Opacity[1.],  
LineBox[CompressedData["

1:eJwUV3c81t8Xt7Miu4iQbLK3+zn23jJLyN577/HgeR4jZPSVKKUhSrLiSaKs  
KGkoSWVkjCOKqN/z++u+zuve877nfc65554j5Blq601FQUHBdICC4v+r1ubb  
9XBWCowqcSDnE1UpfCqcu7sS8xHTfXf//cvqEkgd4I9siPmOVYriQ9q1SmBs  
Vt2eGLOPyZejdJMKYzfG8/0k2IOQsc0tTIHz3nld+6Yqys+BHKlj3xqHhfB  
5Q6Wm0wB7CCkg/v8LrgInsR3nJw8zA0N4QOB9mWFwLTLoh0Vww8q/GeuTsvl  
w1EXL4oPFsdgyzpzHI1EXg+Tn2uKRax4/a7r9kJYKEtsK1AwHCoPGyd29j  
Bw8W+1NSrw+LwlhaCJ5hNRcuJCuoh8XIgKDXT3yoaTZUy3y8eNXTFvRo1MT3  
PmXB9Y85e28sTsJ9g9SWqtgsmKpe/VRdLAfjmZ8j1hsyYfWv3lXaAAXgcv1i  
Ny6bARsOR+w/fVIAUnlXx7dX6fCrcZWm45QiBDUZf01PSAeKs5U+QTPk8P13  
xc27z90A/dGqxKvDKlB4/YnzPZZU4Obpe99QoAI3xhVd/CNTgC+0koCjUYUm  
PU0biQ/JIHJM/7v6miocpvNKzb6fBCqplXdrnqlDXsm7+q04BHDB9FVDYrRh  
XbKNff16DMjmSFbLb2tD8fk/pbrSMUA1doh2KxqB74esVomWaLjt9nE8MRqD  
L8MmT4uGo+Av0mzT7wRATywnxXki4ZtnY4DoLkDjtc6yJ00RMI4TEqDX0IE6  
sRj/AtMIqB89kD3coQOeIcNiOFw4WLTn2Np26MKEk3pmF3cYaGQY0Snt6MLQ  
20xbhdRQELne2cGlrgcCtInqyZCYOd7jeBkux5sHbstq4AphivJwatn2/Wh  
tP8Zl4FAIPysosMHtxnC0keqhrb3PjDdE69t9csQ/ussfL/m5gMDsytrcqpG

8FY6++XAnDdckn7l+LPVCN4FVgTw/vECw67LjxJbjcH0ZnvcsO45kJthnzy9  
bQyvE6iUE997Ai8NjohUTODTjMGbs1Ge8MMsaJOy1QRY9QYLyxo9oOKD2uPc  
B6bQw3JkMlPTHtl+3Y4K2DKFW9lP65SenYWg48fEzZXNYE+Ar+0w31nQCaQt  
ZH1gBiKc59ranp+Bpd2Xp8tazMG1XrtB/7QraPIG/r563xKaj57c/MXiCH1f  
otdMflhCZsDZWsOLDmB+O+3bD0kr00iiOfjVzAHctMreaV6xArED/ZFTJqda  
p8l9yt/YGtp/v/ck1NsBjsPnnZaPNZwxFzzAqW8HQ7GBE6xZ1nCxYFOy9Ist  
2ELMyINH1rBVJctrf8IWvF4SuihVbeCY3YfCjz3WcEP5fPuEvQ1M7/hr/wm0  
hu+VZS31ETaABCmUZw5bQ4xnbYNFow089FSVFLbmbPZWlVjxkk65n7XoNAC  
bnF9SZLntlNXfeWEDUdjWI1fiKNRsIM/GcYXeqaMQHF6JeqtlR0wLgr/9/ec  
EXRd/xWUTLCDEOZAawcp4Q3iuevDMIJU9xJECtLce6QN7FbtzlaA9xHYL6W86  
6IMDxeFTocgeDhsVSdOu6cH0gLAFV4I9dD0YY9UQ14M1ZzVtj3V7MPvVenKg  
SQeUSNrqsqynoGPMbtLQQQfihfWUD8icgt5K7Xf4vwBUyxYyd/xOweHveUpk  
WOBI0se/8+kUmMzuhnWlIICpLtgVgnWA5NV7vXr31eH2lQ2l0WUHyJFRXnuo  
qA6C9Q5BTAYOUFAVqHunVQ2Y7gp8yNzZBL019TMDT1Rh5nFje0K7I5TSL1hd  
3FGGU0/Z19pe00LR2se5AqlyDA3FiG1tOEJoY2dXjZAYPHiFykJlnCC2Z4qw  
ZqME+LnRSK8rTlC591+u9JAC/FtUuF37yAkEj9rifgQpQNRq2ZfpKSfl2FdV  
SGdTgLO/3GyceZwh4rycx/JZeVBi+CFrSXSGJw4Pd9cOycG0N0uSaowLXBq7  
H0qllwI7+Uih6BIXoAtLalNel4QB5bdOzXddoINTjTcrUBLuo8vPpJdd4EDW  
SeZ3vhKQa33ympC7KxzN/ynAkCIG+/YIU27JrkBd2OUUwyAGEc6/OKouugKe  
zjHuRLkonPF8lMH92hX6z1xZOtpxAhSirNyZTE9D+uHpFxbcllAfd7/c2Pc0  
5D+/cK2m+TgcTeYZy846DY1StrGfrY/DAdwnbYpHp+GQV9z0gRjhmCoP5dtS  
PAMesaeXv0sLAE5h4ZtpfjflPvDUVf4sP/z4E5tYpu0GOUZha6qPj4Ktlrug  
5Rk3iPL/IFQoehQku+UCuqvc4Niae+3yLi+MkV7u/0d+p3eY9OmyBw6D2r+O

K3aaZyGR2fmamt5hulJdMWJyPQsCT5spOnp4IKon4nzCxbPQ0Hh6fu4JNzB/  
zituYHaH2vwTcy6LnACUf71yj7rDtEn46c9xnBAAtFKHqJe00LNI7DP2MnDDt  
4TLFZ+407RpefBHKHHDvi6QogeA00mcfZdJfYwOH2eEOf0YPSFuT43v49CDg  
aYBowOsBT/xUU0tFD8IjkRY3IUkPcOZk+jucxwzi3lXUkyYecDxOyoPJhQn+  
zAVZG0d5QBOh9srnYwwgR/f5mEilB7CYcBf1VNCDI+ipjX83PODKkYkrMZz0  
MOqjXd424AGtq8xz4pwHoGbh4GdRek9YD5jPYVekhYkDGfepDnuCPfMUJctj  
GmAQ386eFvOE4IghxBAbGojwm5YsM/KEgx5/DkrGU4PBYmMUby4nmOqcOqH9  
lRKWlqzoZ2nPQePRONfWk38xw5+Ly3c5z4GA8d9wrop97Mp+5lly8XMwbmVy  
Nph6H3M91F7Go3M0bFLq6Me+/MFGIAVPmCWdg19ziisjvTuYONZJf5hwDtb2  
lh19dHawLGP7ldnKc+Cs/tw5r/c3pu2aez+17RyMXvNx0xz5hTWmrek0b5wD  
JBAjuvtnC2PE40+kUpL/Aa62N4T8LcynRITB/JAXdLrL8hkLbWHHrju9mJPx  
gpUt92Buq59Y0XCP2xF/L3h/6EHHb08GFsF9PjHtkxcscnUf76daw0aPSZ21  
WPUCz+Cyc3e9fmCSEv26vPtekFjg0/j36Sr2VX0HoYXXGzoY4NSb0u+YvYdH  
xclpb6hk6gt7ZLeM3Q34k9ji5Q3ZXjKRCUNLGHPUhbPpkd5geczJZ0FvCevH  
DYryncfGduGq07VoEVNpkH9gOeINTyOdLovYlmDFD4Yr+D54g6gFe8G/qXls  
leSd9G3RG+ZWnt3EAuax+peVehkHfGDNo+L2ScIcdvgX5fgDXR8YZ8/bm53/  
iu3qjK8e7fAB/xr5je0/M5i1vyyD2KAPfBTFblweQa7XoQ/Lj/pAxLxhZBJ  
gxnm7pOuk8GOD+woDT7ll/6ENSTdfxys7gsDTx1uqf83hVHVsu7FmviCkU91  
bTX/PmBOw4Hb6c6+8Gyxcs7B9wNGyysiVRbvC1eEN2j84T3m1lZaSurwhUbj  
lW1lnndYy/Ra48CgL5jZKdDJL7FG0ksBscnfaf29FLed463WJs97d/5HV/Y  
iLQ2LeB7gx3aiPZl1fCDg8NuAo0mE1ivtK0Ge6cfCMqW9bzieokdtr9vHzDk  
B5Hmb5vn2l9gIYmsoVHv/cA5hPbm+pkXGN/Qs6u5u37Qej7/VIXrGBblq3bw  
noY/fHbjFx980oINFZSKPTT1B/2kDA59yRFMsHVNp9/FH0z3C3Q5zg9jz2lu

xkwm+EM2afiV198QJnrlyAzlQ39oNyowmNMcwJlGo3eZhv3BYqUwh6v9GTa+  
9pKT+4M/tMSWJnGoPsNSMbyJ5B9/iLBT19fQfoq9m9ptttUMAM+nA4/O+/Vh  
ej6p7KsPA6Cs80OntycfYzsFC92ewwHA0HBUGmiB/Oj29wS+hAAzFGZVyQT  
ejCDLQafmt0AEJeN96aoeIRRVFI1vKQeCLpnqVinGbqxEFO9lNMmgSDh1qbW  
F9KffXxs2crnHAjFf+WLF948xDrveotejAuEpqfin2vvdmlRBSV05W2BEBn+  
z5Uxtx2bpb2MHJ4FwhETTYyath2zTb4Vw/U2EOgr8cfbs9owuaDH8yXbgbDJ  
/a2Mn9iKLZn8eFqkHAS+87J95h0tmDutWQ7+fhDMXvrFOJl+DxtNcnhk8iQI  
aq9U9zqK3M00f3r8on8VBN0VzUsDA3cx3q9xvjkBQTC/NfzQlecu9rrnulgW  
fDBEcMS4+JXewfTVmlP1dIih6M0VjpDtBqy5qbuNyiYYDKv0xrpdG7Ci6gmX  
9LBgsAkus/918jZmmkRFn9IUDJ3MK52H9m9gHZsHQftRMAjPyDJUxd7AxAOP  
x02NBsOD72sVP37WY7Quct8SVoOhkuXD2L1f17EeVbeBWjkQkHbUMRY7eg1T  
3uzIDb8dAn+1ojRcXtdil3bLL4U6Q6DOXmshPKkW82w5yjc+EAKxXwLxBidq  
sYLo1DsK8yEgIDl1bS+xBvv2S398UzAU3knbx0XGV2MpTjF8dSdDyf2wm0Xm  
50sYZ0e9lz0KBZ/Nsqt55pcwnQTGXy2uoSDx8GE8JlWFXdwb44spC4WD1zma  
2hguYnJnKL1Fr4VCcVnVt7mcSuxpt0Ljm/uhoNtjwflffSW2mXIBVF+GAlP3  
E8cAtgrsetodhT3aMKC31IyxxMowCupIx24IA0aeXhkJqhLM7D5TEpdxGjJ0  
uor7XC3Gys7V1QRbhcfp6baniYbFmHTf60V+tzC432b2iaH4POacrZaUkhgG  
boVPNx9qF2F1yi9r3mSEgYDw1du4yUJsbC6/XxYfBgHgykvSKMRwhv+xfKoI  
A5v1xGUfugKs+cDfGqw1DNgbLL709xCw/bay/vLuMPAPE5TLUSFgxn4nl370  
hcH+tDzV+0Y89mnAXbHmVRgc/ljd71mfhzHjn/RTrldBCKtF2/nWHMybOW/p  
sVQ4BBhMXR7WzclahzNutSuGwz2lJanTrzOxbXxSQJNmOFxsiZrQCMjEcAxh  
S1Vm4dCyN2V992IGdp3OcSk2MBzKVfsWgSsdW+23vhUSSZ5r/Grxf9rTMJV  
0wDvxHAWmL3Wc8MtDXtGjZZsCeEwTMtz6fTZVOWbxYklmdvhQMMVLH51NAmt



6xG4jXI/HI5PafbTKyZhcamHA/gehsPH32c42y8mYvR/mZboh8OBR9fY51Zk  
AibxZ2Px61I4hEWFhWyaxGEBWz2LIZIR0PnkIf+9hCisuaXzZpFCBFwXnfc+  
xByF7Ua2+OdoRACHffjg/+VIjLBRvxhFnsvEsj3uUY5GYA0/ChatAiJA5INU  
l7d+OPazMfemYUQEzPoe+y2wEIZphWT4aydEQOu7T5VjhDBsZCV6URIfAQL7  
mu7TD0Kx74unF2lvRUA17QchIYFgTOWmw829exEw2WQ++CEtCEvxs/bf7IiA  
NALlwNx8IMayoLc4MxgBT++xDtV0BWCys5KLDxcj4I6NzKUNoh8WNv37W7hE  
JKT1ZJZI3/fCzIuz5T/LRUJs2HW/VIMvTNyQPcFaLRJKk6P9ew5bOaOFNNJ  
o0igfvRMnsB/DrNOdpNZ8YoElyqC9d/XPTBp+eVo16BIeCWIO/3VwgOjn4sl  
DUVGQukz4SOF2+5Yj/l5q5sZkWBSQSHMYOG0yR3tC/epiQSagSwXTT43jPmF  
defrevL923d6bDLPYN8yP1IZNEWCPc22kvfqaaxmebvkOCkSfMK+6Bo8d8UO  
PZRonfkQCefD/B+FNjhja86Fuy48UdBH6X/uyewpbOTgUb0hgSggBnSLG8ac  
wm48vkFQF42C6QdzKr8YTmHuEr1HDytHgcy/bt0OVXvsxe+f6LVtFLy++fl2  
0W1brKEhPUffjQo0pDhSnS1ssVx3lhf3PaKAZXqqeG/NBoMBMY/isChYCsvk  
btK2we6Wu2RaFZDPHxr2u/nWCiOaLQyTLkSBt/7h8H0VK8zvXySn7CUyfoaZ  
a1KlJSbom3+NuSEKSqh7uFt9LbAilZ5ng4NRI0xcJxciZoaFvj7BrE8bDRIt  
hOR9MSPMSR7/NZ85Grx8jP9HhhikL/a+ZYjGmqu3PzEYGCiHTJo8w8UJsv9  
9+afBBhgd1uMnxVj0ZDOotNKOaaHVRy6Uz1lGA1i/nhqymA9LC2ILUbUMhoE  
fMW/zThrYTYi70U6T0fDjef082q2uthGSWDG5/hoYF/5VfZ7HbD3P8acpdLj  
cmqEnkA1YL1mSvLRudFQWaMU+9UMsBLq/U/05dEwqzHz1MUJw5QiC7TIWqLh  
V9/YneF9LSzG9t7vlNVo+0326cv0iBrm1sj1YmArGhK1Lj+WsFXDDBkT6tn3  
o+FsQYXu60lVjKdX1+E6UwxolbwY5F9Twdrlj+4/F4+BMsJnkoiqMlaTr0bg  
kYsB4dPDnBKjSljuYpWnh2oMdBnydSn5KmF0td5sWwYx0L07bq51WRHbOfQr  
50i5GHAcT6uiEVXAvgS5GvoExEC770at5og8NjTwiP9ueAzEq925IBslj11M

yx3RS4uB6n3PWeFBOUxj7Yhk4KUYoFPq+zXMfBJLgtOa63gbAzYi7DQvCiUx  
Dw0qpyufYoCTpyLUnlISM7z2bAi/EAMVdwZ4XkVLYGyJtnddf8UA+QvpzPIV  
x66L+iXuc8fCoUVxomCQKEY4L7M6JxALbVVXhKY3T2Bhexvuo6KxoGn0U0oo  
5QSmMZ5seFklFgw/q6vtV4pgY8klbDoOsSBIwo9XfbfGWr45ZUm4xQLlVFki  
c64wdtFO4BebTyyMVacZXBERxrwkbbk59iY6FCMT15YCXEPZ7glSfdSEWuE+0  
FzNsHcOEpZe0ByZi4Z7ZxeCju7zYgfKmu3enYqHWY6nd358XW6GMPl45Gwv0  
Yxf/Pf5wBGt7+48+4GcsHBBIZ7UZPIyZZ3JNMHHGwYR9kcbhp9yY/Op7w598  
cfDO+KbMDzNujNu5pmPqeBwYLdJdtJvgwj7LSl2+oxgHjW4pmiUrnFjMewiw  
sosDQ9/PUsXqHjirAd1HVdc4+MtwNTJ+nB2Du8NWgufiYKwtexUfzI4x4RyU  
1yPigMqr6v3uTTasRj6IoqQ4Dta7avlJGoewwdzysjcv46BjnPT3qg8Tpvvt  
x3nVyTg4NsY8E/aREesyMs6vmIkDammvgBUHRqyRbifT5UccSNF61d+3YcCK  
s1zCp5nj4XrA65d83gcwptnmIlwzHlwnFOdXftBhWXpMfjV88ZDzkj2FMZkO  
i6HqcvOUjAeTF62X/l6ixVzS+M3njeLh6py9Z/EONfbqU7SRkVU8aKxHOxVe  
oMbMsVHdGw7xcEpkpipVkrpDf1PUA7zjQW/D+CVLNBumnDQjupoRD8oDh6l2  
D1JiS7FXKbe744HZSUCk8Ng+Ovf2z55Dfzyw9jAXdufvoSkV+99ti/HATWv2  
6vHfP2h0i+ZH/Id48BzMbuFY3EXNkT5T+7/jQcmKlJ7/8TeSekV660aRABeP  
Kige8PiN6hR4Xj06kAAixlCwOf8Lla0/G0znToCyY6yDmzvbKCFUoo1WKQFi  
KhvpMc0ttDma3uyjmQB5QjKk3Rc/UZDs+zvPdBOg5hWzzIDfT+T2HV+XZ5MA  
jzlsn2rN5Fu4Mr5g6EJoCP8heeh4AZi9G0K4rqVAEa6dpHdP1dR2ms/aq7m  
BChlm5aN19F23rCFzk7E4DOSTrqxo3v6lvghWccQwlQkOHHExuwgjrjfwiz  
L5H3BxsmdLmWkJyJugfbRgLYHk3J7MtZRNfbvlux7SZA3Jmz/kb731BxqXvy  
IcZEEJq8MsyxvoACLA3fsUgmQsuWdybf7hya6foXwqKQCIV7q5l/MuaQg1QH  
LYtGijhaSFZ7sswhXXppxYOmieCyS8+WJz2LeHvZCpgCEiHN1YbuZtYXNKT8

UY/+ViLoYYMlx5Q/Iagre3+gORE2Ln01UhOnUSu7dfiBzkSQNpBPTZn/iK78  
6K2mG0qE/VPnkz5fm0IJN2/s0CwlQpkLjaeA+Xu0xuNZRLORCMH4sH1c9yTy  
wfGJ0ewmQq8l6b8t+Ulke67AnpoxCVYkdh1vHH+HJpjmiglk8BBE4K1S/wN  
qiHIGFIqJIGGiCz1nbuvEffu/BSFRhLUDbovSGq+RlRvnRkpTJOAec5sp8hx  
Ar0vwrz/+ifBDF6XM6hhHBFomPj+3EyCfxft+L/GjSEWvip4fS8JWuTvPsl9  
OYqK5GV8mjQsGf356YMGmVFU6mZ179xgElgdGswUWBtBVe0lRiPfkqAsllEy  
8b8hJDAmEnx9LQme/rZcWj84hGrmHhSn/U6Coatxp5wzB9E19ncfleiTwc3p  
1ZPemAHUGHQ06pJYMpg+H+BNSnmK5DLvVMaeTAY1pjCrn3RPUXMlemSjmgYw  
lrGuq+f7UdtTd0Y6o2RgmbhVKNfUh3oEr9WE+CTD2dCBDH/aj2h8QuY5di0Z  
9FkxD9y9iD7ZdLGkTvJ8EeYUTkq5RF6Q2I9+GdLMnyJHd1ofUNCH2Qjzt3o  
S4aVihn+yvPdaDa3defQbDLwEKc4j518iHwuGx1bXk6Gr5NUjSHVnejbg3f6  
/ZvJwFpg7Tl8qBN9/7JbGE+dAsEP+rRC/rajbS1M9ItwCthNPP7vxp9WFGf3  
wqxLMgU+ir9ea0pvRbv+HuFlCilw43bvhh5jK/pXltllqpsCgs8L708KP0D0  
689s73ukwOrsil186H3Ee806NasmBbpvCbkdDbuL505GybytTwEhpui1eYG7  
yPBhxQeJphTgeZ008191E4p40aM61p0CVx2vVl7xb0RD+2FrRz6kAFMW9q3g  
eAOaob9QHfQlBXJ2l1UZK2+jbY4080eLkfdze8NpKbbbSFis8qbX7xQ4rn11  
WJHhFkpw00/RxJUKGTxfhmR4bqAijwesVPypIH7ovuWNmnp0PWiy214kFQb8  
6H6GS9ej8Qwh3l2FVEiVCjR5ZnodSTbdG9e3ToWw83dumdbWoQ8HxvXe410h  
1zl7QaKhFm2wb69LF6dCo+OvsMhTtYhegLcmtTIVujN+/jtLUYuUIDz3RG6k  
wljhUSMG1xpEdN9oCe1PBab6dbMpg2p0JZD7X09IKmywKrLq3buE2mM02Lgm  
UoF0/iFGPHYJzRIzgiu/piIn1nmklKYKVZ9mKKGiSAOn6cMM/D8qkYQn39Jt  
6jRYvKldoBFWiVp8ZXROHUgDbov3X95sVqChCjsf9SxpcCm+RMqFqgJt51aa  
WfCnQVSsbONBzTjk+UCCpkIjDYSv+3s6sZUgJ92VG0WIrB83/ufEnWLkMdZo

kaebBmPzjHWHzYpR1KJieYJpGry9J+a08s+ji/xl8oxLGjjWdenoSxShulsU  
Y6fc0uAhVdXh+ZuF6I7qk0hLzzTYsbcdGKcpRD02xt1YQBq0rm1u/enLR/PZ  
ttbCCWS5HHtAGURAA+xcW7wpadDZk8OR9hGPdi6/reTISA0XoZ68o7Z4xNx5  
+isNPg2KDz4W9dXPQwqrPjELIWIQoMIHYWSWg1IcEqsA0tJAPkT7iPV4Jsr9  
qq1zrTsNPJwKtGSDM9H5MIr5S4/TgNaNxEvPmInq8NknCwfTgNo0NszHJAMN  
kQp7wyfTwIAY7PZyKg1NmNn6BnxMAz+1d8rns9PQx3eczOc+pwH9Jb2/Iyft  
0NpG5Sn7xTSixl20kOdIRdxidd9Udsh4hc9in1xNQoItPvkn99Nag41bm/9Q  
EpLQkVAQp0yH04WuR/5LTURaro2JRxjSYZp1ybjTNwF5Fraz7B10h64jy19y  
XeJQ068Rpcdq6aDNJLMT3xmFqP6944/RSocbBSX5BMco5EA3RycF6cDY0PLv  
9HYk2uPcf1dqlA49htEV70qRyFRBJtnPIR2+Z9sm10+Eo2p1dR9+l3SIkhPI  
4EsLR+tgYDV+Jh3Y/qQw2ciEowqrM0Ja3umwZ5FmME0MQ/NB+f2sUenwYJue  
XehRCNKlqmzsi02Ha0G/BjG5EJSfeK08PjEd3lSyrTvWBSMlflf/14x02JwY  
fHTyQhBKr/9+s0180tz/Ydn3X3kA0vrFwsGtKR2GXs2yGR/yRWGLzhjH/XSY  
EbjE2XfDBz1Z8xYfaE2H648HzY7o+aCAf8m78qR0SAjh+62R7I3ajzZW0z5P  
B37GmYYROi/ELNKZ0/kiHWxaE9oy75xDZ6WehoVOpENMYo/q8qlziE5jWnfy  
Qzq8v/tNve22J7jzZfLoWEqHb0HLN1oCPNB1N94XHqvpEj4l008u41F2vUU7  
uDfSgTZGsaL0lTuqiUKEtj10sDWupk7VdUer50NO2tNngOPfkPqac25ItzLh  
MANzBjC3hHM7fjmDLtTgKEmsGXCL5nr08LkzSKup+pUYTwa4Mk0a9IecRviR  
0dg/JzJg+9fC1qerLui0K6Hxn0QGHnxQsomSdUGyS0Zz1LIZcH9dR2LmoTMa  
P/DYllkIA+7V/Y5j/OSeePXuy/AbZoCCn/HCLT1HtPIy1EvINAPYZW/tNH12  
QCR36f9OWGZA68qsSVq6A/JMuUYv65BB/k9dvuU/PYVudpR/RT4ZUKyasnfb  
xx4lGNvz6gWQ9Xc+Tjlz2CPzt4dsjElyY00SZdbiYzu09jOPZBWTAWcPMAZ2  
iNih3kzDLbuEDKjCSVj8e2eLStmppZ1SMu6C6W4aGQqEtUpNLqnTHZUBkwanE

AEpbxPhI7YUXPgNmaxjDo7tt0JTFFp1/QQbEpoe0xiXaoLTAkKjwsgxwF26P  
ity3RgPX3a0yrmfA5cN51blHrNFFZX4c7IYGCF99/dlk2AoF9U124RvJ/sWN  
qNb4WqFDX2wlS1rJ/s3H0roaLNGXMFaP8s4MmDoh35Z/yhK1/Bsu/49E9h+v  
jnglSVy5DegrXuaAfw09To2/hZlvIFS68ZQBjCERMhyHbdAuxqkiIbRDFgQ  
MJo+/tkcVTupzrS8yYClj/OeE77mKGxhk7vjfQYYtzW/a5U1R7oxy26pzOA  
y6zfcfCXGZovkXjYP58BR7dWj0sVmaF24fn1waUMuKgsMGR91gzh710RH13N  
gIqsPik7OTMkO8ZX9mY7gzwfX3918a0ponB7N/J+NwO+/7cb0XrHF12vIFJ/  
+psBBR+3UI2zTVEM10v4Al0mVMlyXFhVM0XGLUP1y4yZMKNGsd3MaYp4xXOm  
f7BkQtuqW+yddRNEMqAw/82dCbc/qxPWG00QbfqGKINYJkTQCE6GKJmg6a+8  
13YIM0HL5Ain8GET1Gqod3xFNhN0v4pTu+8ZIx/m0mNjKpmwbJshJvPUGD0t  
Vz58wTAT7vfNNM6eNka4xjgGIR/yeVFV1zvZRsINrTaHPSATmhOu3vTwN0Iq  
UYO0NCGZYF7x/N08uRGaV+elWogmy8903XHkMEKG/Q93G7IzwU/gUGTSJUNE  
N/V3We1ajoxQ/H17rM4ATS0xAMmbmeDaU5cflmmAWmutvvHdyQSIW5vj7p4G  
yMe3ZvZvSyawXshq5ThmgJ5u6Hzs68sEl3XznKASfYRjyB61ns2EPxwmKare  
euiAKtM9v+NZsP3nYW1jJyBxzuRIbrEsy17b3jpeAsh0fVW5TzILxI68V9kj  
BFRwe7zzmEIWmHSJy+wKA0IWvNj3BrJAIZ3k3E0eDKntM+Vk6WeBgs/Z9FL  
hFzeJ5soGGdB1w+Ln2z5CFWXeozmW2VBeK+FnC0DQqIMEu/03bLg7kpwcd8R  
bWQ8f/HihkcWOP6caE/+qoUCnjCfqfHOAqe179INTVqIWJNyzNI/C6I+/DUI  
TNFCjclrn/8EZUHwXQvXN1Za6IWLZ93NsCw4ECDYRy+ihTZUJ3wco7Kakrr7  
Lf8fTcTJZShBG5cFAjH+3+VeayKVjbb15sQsECIFnj7TrImcxiQa3VOzYOg1  
QxKpWBMINPwXxpKZBVNteVdDYzRRVd5BxS5cFhw+Ky9JPKOJSD6pW/54Mn/J  
M1HxRppoRm+9jacgCwbo06TzFDQRldC5hP7zWfDZ5lR4s4AmMvhg+E+wkqwf  
cUk5fVcD+bS3Px6tygKfsLA0tKSBci9IZiXVZEGl2Ph3/Q8a6FZElaFkXRZY

Szmcq3mugUasWBje1WeBIGvR09OPNdCqdNpw9u0sqPPh2M9u1UCHGDfyFZuy  
IKI/ckXsjgZSWDhn/bk5C4Qf6SdYXtNA9n2v2Qtbs8B84QiR9r1Giql1eq3V  
mQX4l7gDzhc1UEVKR/ISN1mf7di4fbkG6nSVcql4nAVVGjEvaco00JTapaOG  
/VlwZebYchRZ/svF+mlzgMynvInmXoUGEtXmQ60dIdu/3k7dX6WBdF9snLN6  
QY5/5tjzrisayOu0l+j+qyzg/YwzrrulgXD4N99uvc0C00sRzjktGuiGr/Ft  
pw9ZMGcm0h/eo4GG9DuD6T5lQXqa8kToqAZaEZKwa/mSBW2jigz50xql5d+l  
DY95sj+GWgJer2kguSnWB6xLWWBLZz5tT6uJbDvSY7u/Z8E37nwTnqOaKKps  
Uz1wPQtiCpmKxZU1UVmk997hrSwoo3a9VGqtidqt35Ke/ibHi47VxjdEE72X  
MUmp2suCVemHxQ0FmmpiP8aGeMEU22DNsGoXd00QC36TpXlBnQ8NJUwfsG00E  
/dUDyQeyoUDR/uqVv5ooMzXDYpIlG/SExwrPOGghkdm6M2/Ys2FhcSUhGq+F  
+oyfBb/izgbqEPr9F4+1EA07c8FzgWxIo00OKtTQRnUxstVDwtnwyOB3w6Ek  
bXL+WDC+E80Gq6oHkuyPtRGU7sLoY9ls+DCnkTV+6v/vqX2apJANzbQn7jdd  
Q+hZ8PvVhyrZUHnhQr/JDkL0qsdYW1E2UJ211Fy/jSH84A2rW5bZ4lz7u+tS  
A0hSdvhsVW026BYl+bC9AzRc/D20ziEbNqWolr6w6SDm0wpF1W7ZYGNgSNwi  
6KCC1YcvikOyIcuYW2CrUhed5xizSSzIhm/hBowUi/pIIW7dl644G4w/ydto  
Khug8SmOiOiybGBFSS0d6QaI/bpTcWh1NuCeH3lzks8Qlap9GT/XmA0ZwpRN  
Ly2MkNIlmq/uzdmwwuBDtV1phF5Tim2eac2GiY90Kd1zRoh7OJDDiZQNRsbL  
m30JxqjizJad+Wg22HEPUAfXmCC1Xh4vk3EyP6sLvQkLJmhSVCpk8E02DIUm  
PSDIkP+HtZRSmM6G41452r6tpqgg/610mo2KDMcoXjdboa0FiTn5Dey4VQg  
yhvZMkMfzSy2ZLezYbTj1VZM3hwJcBVzSfzNBrqPQbdar5gjUnzLCVEqHGTq  
O2k9eWe03KbfKB+nw8FjgiTnV2YLdLmez4GfBQcMbrH/MYdaIDwu59YbNhZQ  
OR678bPSAkV5b/4t5MLB7Neh6qVeC+Smf9b05AgOiIRk9elFC2R8fLieih8H  
k4mYwiMWS6RApbr3UBAHN78c1kuWt0T8n69YR4vgYOY7myi9rSWi72G5Jiu0

A5thhQtWYZZoozphZ0EKBy9vZJrqES3RVPK8Re1JHBi2MF08umaJnp62veKi  
iAMC35vQ1S5LdFeTtM2hioMk5m922S8t0X+8kmbPNXCw12Lqk/PVEuF2LlzG  
IRx81qXzmN2wRGHvKH9iujignhX+S/hniVzago13DHCg//TGr2AGK6RfNlnV  
bIKDdJ6aAwmHrJBstMF6oAUO+r/kDtVyWqEj9vcMTtjgwFxtMjGN2wrRKPJf  
nLbHQcql7z6pZHmVLW+13AkHhwKdvavI59+t/dS10Y2Du88arV+T8XrH3MsZ  
3XHAfT2NSpzJcJU0jiw/OYeDzX4P+2JqK1SerwbJvjjYmp89xr5riTKC6kpV  
AnEwMVCFrq1aoiCzQ4s/QnCgK3UUb/LZEjIImnfjMDBxvOtD3tk/sDw7bxn  
DA4qwroOdvdiYslvdvN8CeR4jVPt5NyxRFzPHmm8TibHv8U11rXCElFclyos  
SMeb7GtnT+V0S7SUVf7VKBsH1T8LSzj8LNHEOWo1yjwcpI0XzW6aW6JHuqHE  
TiKZr+wP2YmTlqiUwkhZphQH7WdZuYk/LFDKp+a8+XlcnG7Z9j47YoH8SALT  
l//DwY9sHJdkvQXSTtrGsV/FwZXqpZ0qB3l/5+r5Yfg6DsS9Zz+DIaVi1xg9  
mX0LB5H1Lwtf7Zuj+V/X3v26R45X9curXVXmqCjyl0THHhzEmUbFeTw2Qwm2  
j1PK+nDgn899Gss2Q17yMq+sBnBQ/0d3fNfQDKn/oEnqHcPBWFHGFgWfKfoS  
0PK8fhoHN840KHHWmaARE0Fhij84qHtYH3fFwQS1iRNjeOdxEFbUy7dPZ4KI  
8+e05X/HwcVltXMsHsZI2ZMjPGKP7A9tdnu/XUMkyrXMfIQiB4KC1yioyP0Q  
90DvjUfUOXDuX2RCsLYh2paJmGFmyoH57q/t92INUPvOC6v6Izlg/ubuzdaX  
ekjrfIHslEoO/Ps8FLDPB0ha32coQyMHAiwL67g0McT/S9tHApHxR9qk1LQQ  
+nv6+6UYgxxo8eP1C1LXQj3i5gfZ7HMgLO3Zo/gTaki/h2HFIDwHwKwCG58/  
iZQiP+esRJHl+RzZmhkZdEK043hJXA7sEf50aH+UQnREP9eZ1BzoyYi7Vz4j  
hgYcnw0lFOQAfpIprjxPELUzXvYRKs4BQd5uQe/Qo+hmdwzVwIUc008serp7  
/zDCHxfV4LqUAxMPXzvWebMhsx9ZN5tuk+9b+uySx7mirXXltIFDUw5QZMTt  
ld+7pS19SunzXjMZb67phf0Jb93MD78eNu3MgcMuRrnscVSkveCHLWvdOfDu  
uXyzTSg96btgiXX54xyQ87LIP6/OQhrF6ebODuSA7ULcBYkaThJnVeEMJID

uQP3Azu1eEhNK+uP5F/kgKhEVFbgoyOkItvaXylvc4DKPsJ3NFKAIEYbX3Li  
Qw48MLXj+GYjSApvtz45Mp0DkldEGUxchUi2AhS+R+ZzQDcwVDoRjpMeO+Va  
sy7lAPGar7KpjAhJruSQBu1qDvRV/X38ge4E6fLziuN/1nNAqPHK0rWREyQW  
eqGD61s58F6l95lAiiGPwffm9vxODhwvHQ7v4hUjrSTJz0zt54DScRnKrVox  
kmtbx+A4ZS7o6ZwqQBzipKF1nfsDtLmQY9YszxoiTlKXHqoiMeSCyuVm6o/3  
xEk3fGxxLQdzlbuy76jAtDiJp/Z96C22XLhT7nDBeEOchPvg6VzDIQtx7Efs  
9NfFSVtcy7plR3KhlBSzfOyzOMnLOlKayJ8LlzkVEy94qRx/B+uDKFc+Emf  
EcRZKk7S6c/8F3siF1qm7CnMHMVjd/8xLQZL5MLAJYGSbiZxkoBG6fg5mVzg  
XAjfTbgnRsqPOtrLJ8LlnafmYqNxUh7jXXXrJRzoS/pXxXbS1FS4KJ0oYF6  
LnT9dcukNxMlvT/+IE5Tm7wfWVya3XqCZOKm7SmvQ7YvRvp6OccJUntFv5mY  
Adme2kf5Fp4iJLFXFsr8JrlQVTQt2Hr1OKns4BsBDotcMP/IpzwzIUyKyphf  
/2tPxx+jqdrClkT62hXy4acTWZ9K/0UityDJ9td239LpXHC67p+eJihAks6  
UPHGKxfoI1X2tu4fIV2+Xpg+4pcLxoxBK/z2PCSWzzyBvUG5EMZAr9b6jp00  
ckocNUblwprkoaNnJRGSXlvuitXF5Ulab/DHkiwG0tCQGtvFpFzoye5prLhP  
TbqBmcxmZ5H3V176Lzz63s2T8PJ5Ym4uUPhqlR1P0rGtTi3hRNzYSaKqrP4  
+ry2l0QA/kxpLhQFDqv7lVMjQQ6CnHId2T/ejM92Ng+jQgsOXqkbuSCI9ue/  
/j2K/ub8Ry3UkAtBUv8lPT4viKb2br9hbiGfV9+82jllgirmR5Jmn5DPA/ey  
GaMsYu1kGSz5SuZjGNZd66qOBkJmtg0WcqG/KQh/8aYGSjveLPJ7KRdMzlpJ  
9e9pog3iqbTTG7nQ7HT+W3kzQm/OVqmeoMyDiicz0MCuqiQM8T7LU0ejMwQ  
fRNGdZHxIFaSR58HaSxvb5Um6aEOha+r31nzw0705X37cX1URSt5vVWALMfF  
5XA5GaFTnX9e+QnngX4FYVDqhxFiCX10ySeaB4srax/00o1R2ruwM6kyeRBh  
yLzTV2qC1PN1CflYeeBpH/rMjssUbehwdnxVyoPjN10+nyw0Redut3Eaa+UB  
j/reM75gM3TUPU93F8uD6GQesHlhiY4XcMa9PLgBq96+TEpc5Q/KF3tZpQH



fhdUm44kmyPDL/Dh8zyQDhi0X+83xz9U3ix02uZB6eVT9ycorFA7Qu1YtG2  
eXDp3GPLYXULFF4VeUrMIQ+C0ku15L0skKSNQeakcx5Yc0Tb12ZaoK+0PPcl  
Z/LgxSX1uMZyC1TV+W1a2yMPwq+15y1ftkCnQjuZ17zyoKtxIGD5PwvElkLU  
uOKXB6oI9oFggZ690+NnH0S2792WcGqwBUrLP1lGF5YHbyh7utV0LZCaLmVf  
e2QemHdqtkgzWKD17fH1gNg88LrGvpr91Bzdul13jD8xD3rCQimzk8yRp3uM  
xVhKHjBqEMXKyPwnBo/cVMTlga7WatHlGDOUN7L8Zi6PzOduvWEYhxkyVOym  
qcjPg/YKhp/Ut01Re5W7+15pHlBoNfGeGDFB4TYKBY0VeSCi4EtHIP+XknQ0  
Xe5VefCA/e6o10djVBVaz9N/NQ+CGT50inwxQqm6q6P5zWQ+DP+O3nllgNR+  
PdrDWvPgYGHlyVwLA7R2+7zkRkcefFi+8E3tmT7y5FLGOTzOA3xNlcLIQz1k  
+C1R+9gLsr6itn/RAx2UIvK3XXCCjK9YKd56Ugc9cE9TEen6XB7GHpl/cuQNI  
ZDJL6sRMHriLbm1FhmdIletAvehsHrDXJR3uy0Go2CZPWPxbHjzEcKZ0d7QR  
5VD+Eam1PNhSesHbdEwLqdEduiD9Mw9c4xStAw11UZhu8SHZ33mg51yplNWL  
gaY7yw7IU+BBYoQivjVUHXH/OpypQIOHBtbvmkHjashC8b+/ivR4GHv/39NL  
mmqo6/blLZVDeGBbTVpoFFZFPxeEwtU48cC76tMtVauCpETqVtQP4yHN8+iK  
m5gKOV6ifppH8cAtFs9R/kAZXay68VVLEA8PeJxfCZsro5fvJM8iETzgDIUM  
Wy8rIXqu0+8xcTy4f2erCi1RQmBz0kFHGg/H8Vdmn+srodj8ey915fCw1HvC  
oPOflmocVLTQV8JDaWTsmcw+RTRP2zpgolYH+rjI57EliohfV03fSAsPtg1b  
SvNBisg+pfORMeDBaWVSkd9GERE7tTRN9fHAyLnnHwiK6Mk2qdXMGE/ud1Rj  
j2kqol0FHQULczzY4P3/5OgoIoXQJ3csrfEwWhRUtmnmiAJuG0hY2+NhePXo  
t7sRiqh24VmdjRMe5NMciliqFdG746aCdqfx8FtwS9b1jSI65D7yn707HsTu  
Tjyb41NCRIWWPA5eeCigeDn6J0QJpbx7Uezohwe5X/2s38eUUCunHYtzEB74  
gwufHsCU0Xfr13kuYXjIStGqONyljETyHWlPR+Hhg/nXWyO6Kuj04GTamTgy  
Hu4Vt/dLFTSkMx3rnoaHPqg0GadSQzcUFRx9ivBw/ddvbxqDfQpxP+zbyke

agwkTc3MNRH37eXT/hXkfYY2o0N/NFH28TW7oBo8eOwsxyo4aaOusxFjwXV4  
qK0/bPuWBqGf//00Db2Bh5SXNyNYmhDy5NzRibiLh2tVVG96f2PoonVid2QL  
HhLcxWb0zAC9JO6rRbfjYU+BRIC1HBD9YGpLTBceKubjOJ9/AgS0VHJxPXhg  
qfKpLxfRQbE6Wbfj+/CwENnYK+6tgxqT6cQSB/DwtUDemr1WB8135F5JGsHD  
w4Mv1eff6iD+bUaBlBd4oGIL8Vdh0EUudDszQRN4qFLh93qnqIsquBeuur4j  
5/NuRoSjky56Lfrax3QKD5XOW/5mMbqIXfWJhPoMhrisho6Z5+sia6N7K2Kz  
eDj11tF/vUoX5TtebuL+hgfP1U2+V3W6aMg3P4J2BQ/WRT+Z88gyfVyi8s8f  
eLi0NKNZcEkXGeb6//6yiYcwjv35pWJdlFnh+PDIL3J+O/8KH87SRT03DFJ6  
/uBhO1+m2DpSF/1tV9Rp+oeH1oz9vYtuukhrUlimmpoAjxn6fYcNdVH8JOsz  
4gECbGx8zqGS1kWti/t5iUwEyGJrZvdg0UU/d5bNA1gJ4KtS0n1gVQcpML5n  
deYggLTiV22eYR0UyjswbsRDAL/Jf8Z3r+mgJY06pxPHCGDsx/2a0l4HiZsV  
83EeJwDFz+GeP2I6yNs1bZpKjAAuof3MVLuAZhJPe83lku9P+HOxtQKQANFU  
bEyBAHqNm0bXvQG5VqktDasQwJOnXvKEPKA3XZxh/yEC7NUGP7+ei6GR/ZFE  
B0sC0F+MP8ZE0kaMLA+RgS0BthWuptMaayMjgZuUSg4EkLQWvCbxUgv1ouwc  
NjcCaF6l/vDzsyZqT9UuGQkmgPk3waVOGg20XSjl8DCcABc02g2cLFRHijVH  
jtyKJkCFVhUbNZ86auzZqs5JjkDrV+YmSzU1VEfZeEs3nwBe+eUVqFQFfWGr  
CpY/TwB5lWbbQCUVdEwYLyd4gQAR0txMjJPK6LRC3CZLJQFEdyWUkjPI9UvX  
p3W/igDWt+1ATF4Zvb01j1+pIYBAzU5twJwS4jqnq/WhjgAPj2cM37yshGwj  
5f4N3iDzSbc7aeSuhloyBXrbGwgQRT2BXRNTQqMlzNn1dwnQt+UfKrqtijjq  
do3KWgigcTVRTmZEERm3fGPMbifAF4fQLb5bigjX9+Z5ZBcBnrveljtVRK5X  
E31Fnj0EENy/YK+Zqogo5prtbPoIsJx94ZVcrCJCWzXcMEAAE51DghVxiiiR  
tnBSdoQAVglBDA8yFRFV0dOZyTECYOHjmWnligjP+3ch6xU533aXvE/cV0Rs  
15R/nHxLgMc9MgttLxVRxcng7ffvCdC8MxCetKGIBDvr9rOnCSCnk/jNgEsJ

1etP0ch/IYCpIrXsgjq5fjmbceQskuOdW3B3L0cJodkMXoXvBPgpzHqf+54S  
6g/pFPq4RoADk2dZ7T8ooYlMCTnF3wTwOBDknqWgiNbvHLD4REeEtDR6+ZF5  
ZRSnhtnjGYnwhv7rKBunCqJ4EuOqzEIEXH7GFJuOCmJ5N+dP4CKC7h7jOLFS  
BZV58oerHCHCHYHw1Dt9Koj/u33c56NEWLhTJjaxqoKkqfpwqiJEyMjk3UzB  
VFEL8U/+FzEiSFJtf7jhrYo0eRQv5EsRQdaNYCqCV0W9tQFVaieJQFKsFOpr  
UEWm0leuflUgAs2xaT3X56roZevkrQIVInB2HS7tWlZFTjpszeoaRHj3Vi/o  
3wE150uQ110oQ4QdYkTDirYaWp1pe6ZhQISxJ85itx3VUEzgj9E5YyKElOc6  
5oapoaw0t4+a1kS4pPBTJ/CyGmJmKpudtyPj55nL0z5QqyUXni+fdyTCfuVx  
kB1SQ1duae0uuBFhiz5bNGBNDUkqR1GWeBJhaktS8QGIOr36DY98iHCaidu  
s11NHamZfmVd9CfCf8dEabwF1VHPBC9PaTARTi2X7TfjqCOjs7YCWdGR0ud8  
XhDU1dHoYt6JpSgiFL8+Xr6sp44coh5LX4gjuwq8M16Bec3X08e9vRUGiAs+D  
/wKo7dWRV56c5nIqEbwVlxpqndXRCoeffblkmESz6g8yLzqijyOrLjjo5RNBU  
00Lde1Yd7Yq/tv7BE6Fah5ZNyl0dZdxncSovIMLXTlJAt5s6YkCGZ3WLiRDr  
/YoYRO7/iwaSfb5fIMlg/cvzUg7q6LDdg+CKSiLoBRmUfrdURzUfV6L0LhHB  
3pHUeM1AHYn5iSSSt1hDBYPDCzTgNdaSSXILXv0EEZgvlFxLC6siuPrx+rZUI  
5StnfiyuqCGnDue9pU4i0Gb2N498VENuwzo2cyQijEdp6uNH1VDAD7Y/k0+J  
8C9oMuxrkxoKo9y1mhgiArbd9+FaDTmeHF/qRkeJsD1t0FJ0Xg1lqDZbPnlD  
BJVXBRYyUWoo1+Ti1e73RNh0552m9VFDBa4Zv9umyf617U20d1JDpcEBFs1f  
iCDj71cgbaaGLqbaXmmYJ8In79XkWqSGas5r/Lq+RIReBpXmpwpq6PpVYfPa  
VSKscwmVNImpoYYHjLX/bZDfh9n53FB+NXTv2cbWhW2yfwP9do9wqqHWyFem  
RbtEsFHNte5llvd3y72X8X+J0BY6vpFlo4Z692/9zKLKh9XX4iYuf1XRAGuJ  
SSpdPlx1vB8XtKOKRoUSq+MZ8wF16Xvk/1RFE4rnNiNZ8oG02U7N8kMVvTcw  
Mw5hzwdlytlAikVVNOOoeMmPOx/aFiqvxXxRRfP+fBuevPlgf6uxK+ODKlpJ

pDY6I5APgubbXSoTquj35VdrNqL5UKQecmO6TxWxfovU11TJh5ds8jFi11QR  
565rpbIG2b7jB4WDLqkiXmb91ZMoH0ZkurgWL6giQQFpPUndfEhTYD9zt0AV  
icpxVogY5sNR5a/UEzmqSFp3b0XANB+a1ai5fdJVkYL9rM4Ry3xwAMPLcYmq  
SM1npIzDNh+OWKXd5o9RRSiuZfmgQz6w+GUb+oarIn18FdC75INJgUSSbzC5  
HlRlXaByy4f3feAkF6CKrBuDlvY88uENy+X5V76qyKHHHvvlNq8WoYcVvXxU  
0elxrdJ1fzL/xTSTTXK98ZwVWVwOzoe91AblEvK+3zYzmg/PByeVUGoHP1UU  
TL9VPBODD/Gsl0gWgaoogvfjwvv4flhkYYwkhqqi00l+rdjf+eCsgpcWiVZF  
KejO+bF0cnzw69uiSaooy/rC/GB2Pige5Jy+nqWK8J7Jmn15+WDa2//9Adk/  
RVHeRaT8fKhoeC/vc1EVleEs5trP54PsmGjrYL0qqqpQ1rh/IR8EFJwG62q  
5HrDX3inMh+SBlSaN56pohtdtLP1l8j311drTL1XRY2j39Wu10bDwCCrymNy  
PrTMvM6vupYPHxWnGu7TqaHOje4vZTfz4ca3t7f6j6mhHprrqufvk01dfqPJ  
QJ43hsVjPmc/yAf6eVnD4Dg1xPugPkGrIx9yPGc/OlSQ35/OJMdmFzm+Z07e  
9u1UQ4wuWobuffngUfeESYdaHZkSqG5rvCLn04PShPsX1dHA94KoH2v5kC30  
Slb3vQbqa64/4CxdAN4Rzqa70dqIE5usYZUrACnBM28Il7WR1zCjxlPFAhDU  
1074PaCNqGeDgxQ1C0C8M23Zgg8hXS6llwdNC4B7rbT2VDd5Hqv1DuizKAD8  
zN4R6TmEvsIUUyfaFID79NGQ+8wYyjDcVf7mVAAjzyMIj1ww9Di252KvbwEM  
Mf96pr6BoUM0G4rxgQXwcG/sWjoTIPei489PhpL1DULabvL/r2Irl6fye8IS  
kWTLTrInJMt13WsZg5tsCaHFGllCKklKkbRp4e635CuVFlqUNsLNUtklS6Kk  
kJCiCjX4vb8/53P0mTPzPM/MO+ePF0Eg/8R8dkIG+prNW1LtiHm52237/uMZ  
KBopSnp8DIEenvxvdXoGbn+zcuoum5jXfhZyB85mICWsf9AuDyFlybI6T3YG  
LpQ+aKhVhcC37lpteJXiv9vMdP0Mgux/CRIItzOwTlql1VvIDqL+LRvbW5CB  
uhFxxR2SdlARcp+Vwt0M3DC2obNB2Q7k+e73Su9n4PJndWRTHTuIURulBz3K  
wNCvvw4KEe/ZquT0PQtLMnD61Ig6UOxgp+1zU9eKDAyJPn6iw4lYv7Rt2Vh1

BvZ3bSjMpjtQFjifYNZkoPhSV492XzuIDc5uJzdk4H2lfWav/O3geQX1UXdz  
Bl6XHQ2XD7EDZY10TnJrBlbLvIy4Fm4Hu1PjEzTfZOA7PaUH+6Ps40Un6U0v  
uzLwZfTfF6d22oGqfaFFVE8Gbhk/urx9lx3EXXFTIPiUgVENL8g+e+ygVnBk  
5v5ABjZLd2elxNmBWujJLp+hDPR723FlkFiPr9Z++vtrBg6avRr7ttsO6rWq  
sv4by8B11Pc/FQl/6seCkuwmMtDrn8yq0Bg7SBiY9fs8lYHv2emStZF20EDL  
sk7/k4F8WV8th+3E/msWy1fPZWADI+PTq0Biv3DHv5YFmdil7lyzY7MdNIbF  
fYgXzsTyNxc9xT3tQPOl5DPFxZnoXpv9r4jAL1H3zqUy8UzcJhbitMXWDppP  
uBwJlsrExvsLCv+Q7ED7y5dglDlMDGtj3GWusoOD647b3VTIRMFjes9Vl9tB  
yw1NTTeVTEEx8+y6GTfCrK1ohOK6WidmfK3V+CdjBociAfpZmJjpWjEdb/kBo  
rf1TbaGbic6Hk8uCPiLorTqf925VJh42SWUHNyMkp5sfT1mdiU9+S0yhlCKs  
ctntWEPKxIPXpv0rYBDrBUtXRIMycZHazpWVSQjtYrdEJK0z8WbEcS8j4v1w  
pOFzra9DjiY9e3BgNRnhrZuf66BnJorEd9CsrtqC0Z0Zg9M+mag4lNLDjrWF  
Y0u54kZbMnGDw+UCFaotGDe3N00LzsRbntMHxxsATm1w9BDelYmbbZ+ox4/Y  
gIWxiY/22Ux8PFQy2KhoDeKWKWkKdOj+M5Ga/V1W8FGj6b4YOxPj+w4xN2VZ  
wakfkRI/LhJ4K7QYiCy3gm56bk35rUzUZGQbBelZwt3E77/uFWbinTsPjEZG  
qZAWbK2d9yATnx5vuehWRAVD47dHTpcS+MqKzQ3ZUiH5laTlpoZMPBG0ML84  
kgJeTwliXV5lYvOSV50WZAqsvHSLa90WiSEnh38ZC1OgjXbdhNa7TEwx3gt9  
RP/N8+VoKPRm4l8DE7Fq4vuUCP0bxPoz8d5ghfAuTwvQkEi5PT5C8DFm7Bwl  
aAFTvxq7+79noldbsZpKDxnqe5QXd/7MxFKVaqH+YjLE3XkcVv4nE3P3l1/p  
3kuGdRwh9r25TKzvel+gspEMGbDqk+cCOn636QnlmpEhRHe/5FphOl707z3l  
N2MObso510GEjh/mpdY+eW8OZIkXNpTFdDz2K9VrV5U5qAu0tpssoeM3E5ct  
Z/PNYcmUTIzBUjpG+qcuUGCaw9QwdaGOJB2DVG0nFA6Zw8ee4Cw1aTqSlS6+  
4UWYQ/3rkyaKy+ho++f2xkve5vDwx1aaTk6toeflbFwMIecko6gJQp09Fzk

WRphZg6n7sxOCSnRUfqIzBRVxxziLmtlzCnTcXfSUNRjReI9x3HRmVGLY92l  
kcrPS83BMX1P2Q81Ou5nG19tETIH48PnN35Vp2OnQOvjH8kUN7zbGRAk460  
s4N5f6dJIBw2mPpBm44KH47LrZ8kwfjimpUpvdel477+ae4d+kqDbjXTvtR4d  
d8RVq7EI+zn6rWvQp2P2QobIBWL/XdLRD88N6Xh9Zt0y3gwJzuvl7+Mb0fHT  
zPwwZ44ER1VbxluN6Zh/q8UsZ5E5xEhNX71vSsctxa/PF0uZg6+QmtUtEh3X  
v1Su/KZqDjhDa80jE+cPVXs7GpiD/mj0jhwKHXel9f+ttzIH2Y9MgfOWdNyY  
ygw85m40820lPIY1HX8tH9JOCjWHkRriNQ9EPAKzU080mkN7qcjLY0jHhy2f  
DzmwzYFfaBSQbE/HE+blgbr3zOHmVZ/J/TQ6Jr65QNvRbA5PvC/f2eBlx3+P  
o/Rfj5rDS+Fv4Sud6KiXaf1181IyDEQc63rjSseoLN7yAW8yTCi2MO+up2OK  
yN+cX0lkEKxXcTuxgY7mH5epOFwjg4bhA775RjpOvB92Jc+Rwbhnbv9SHzqG  
jiaMSK22AMxwMfnsS0fts5HUTQEWEJ+6Sp7K5FfXuG9mUoLyHoolT6xjeDP  
0ynZNYsC+WH+9g2hdLw6G6+EbRQolr/590oYHdV0xf1yWEqFzkTbWK8ddDyy  
Q57ieowKsjaxG+/vpuNk7KFtsoct4dyLhuW7Uoh8vLkK9mVaQ3aCQqdjKh3/  
8FevmWizhtsrQ+lqaXRk3okqrFG0gr0P4LNj+jltD4b+1VG1jkmrIMIOO  
j5UeX/d8CnDkzYmikWw6jv/Ys2LdXoTMk63RVTl0/CxFmk7jIORQ1HSycumo  
aWdBz3xCjNVZj3jOeYS/YZWRv38QfgcOHLp5i474ReXgyWTi+/XFbl34U6K+  
/vaN++21B3wfdiOsjl6+P6UTVjPtQfj1ukgYn47d+QuGN92zh9tPX9eEVtGx  
+mDayqwRezhY+Gtl6HM6nrv6wvLqIgdwylM6FfKSjqt6zV80XCAz+e2OW2r  
p+PLpPs/hX0d40HR4zeDG4n4vE6+bol1gKP780WDM+kos/JDWckJB1Db9qM2  
sJXQ54qEOyMPHGazKdXZv5uOK0XNnnstooHuqmv5fu/pKOakxjNTosGv5XWL  
/T7QMud+ZLGvAQ2YItL1W/rouEzGXYi2ngbBsyT9LQN01DqfdH1BAA3W/Nh8  
evMgHe2CHi7/HE2Dxu5cl00jdPwYElex4CQNsl49L/AdjfiYObtoNYsGO54P  
ifl+p+Pt1B7fkBwaUErEo33G6VhRcJefdZMGi+4aN3j/JPqPuqvrq/s0aL/i

beA9SUfdzH+Lf5fQ4Aov8czGKTrevSolKl1Jg91ns796zdDxrNgrL6kaGtim  
Vrh6/aGj/+606bEGGkgkDNzynCX6QWriwvxXNHgfJSruOUfo7etMGqmVBgVB  
hjEeAgzELRtOnGmjQaK3R+MGQQbeTXypclOwHZ3jDTclMXD+1821R4j9cnD+  
rPsiBtYetlsu1UKDAdOy0fWiDLxS1n1rQyMNilZ+dFsvxkCdoGdzFkQ8R1SF  
7rijM/CLtKVWVQUNNkjrLXWTYODhVI7ul2IaqC1y2+kqxcCUraryuYU0GP2z  
q8lFhoFnnJXmP+fR40kYa7WLLANJf998v3+eBukDT845yzNQTDX35+xpGmzu  
evfNSZGB+ZufKVQkEXw2z693Umbgg4CU6MkoGkxWad1dp8rAx536f5mbaVD9  
ZJ3EOjUi373i7Wwawe/t6FhHdQa0v49dOGFE8Hs5s3mtJgOjKr051xVoYMR9  
YLRWm4HWTR+zbs45wOzpzgyaLgNnbx9f/rPfAS7Er9jgoM9AVpZqm22+A0Tu  
cCi0N2Qgb0GeOjndAciBEZL2Rgyc+v5YY30EA7SuK3yFpgz8KVGwd6GaA+Ra  
t61BEgP5WSt6k6fsYZfjdKYtmYHLg1zNxJrsQVzF1gMsGWhPG68nxduDQNPJ  
VhVrBo44b4v7s84eJpJbvH/bMHBxndDjaSV7607btuWhHTHYFC/bc7TYDprY  
Be8YDgz8GqVwXug4MS87TgTsWsvAbyrJT29ssIMbBcdC9J0JPv/leVj2ImT5  
Nw2luDLQas+/vWrEfJ4hIR/x2Y2BXRHDP8QjEOLjkbTnejBQQiKhcLrJFuwt  
6+PlNzOw/Xzhhd3bIA8KjM9sYWB90Q2XNynbgOrcvwOvPYjb03iIXeGNUgj  
fjt8NojQ14k27o2dVtBTJ3lSMIKBzVVXB00WUSFxi8+F7/sYuLrF41SGLgli  
luSoNO5noPkj8p3g42YQVD74X/4BBq6q5g7e7zcFR43EK9sPE/b++9P6l0xg  
2XDWre5jDjxcc3Zv60ojYh76WP6SxcDkPp0+RyltuKy/CvM4DCwaPxdX0aoJ  
7Pd7qJl5hB7Xupot5GlAEi6ssb7IQNN5K0kjVzVwEtVtKbrCwMgmZcbjZ7LQ  
z4vuy7nPQApH3mjx/KBNt1mU6N4HhJ6yeDuinettWl5FGq17xEAPz1Urv65s  
Ky8TCT84VsxA2QUXXh5MnSzn7g+WwQoGLqy79mWN6GL+2WVBFNkqBgZriqqY  
HRPnpxUGBA5VM1DalsTab1iSv/vL1gJ6DQMt5DaDNXkZ32WTj/2nZgYWNtcb  
lWso8XFiY+SjFuJ8VEaW2CFlvkWmV0Z6KwOvq4Tt3Nqowteu2dBt8oaBhod9

3xW4q/GVQ90FFr1lYMgbr3z1Iyv4UvNuut1dDNwmOpm8baM6/x/ZJe5oDwML  
bDxarHZo8Cdbnc779jKQXNBKT/mqwR+JXcfX//R/fNNqmiM0+R/FHAfm+hiY  
QFWuXPRBk//mOk2sbYCBA8Ye9ULuWvxGewfjG4MMPHqkZ831J1r86g92vklD  
DKxiHoRaZW3+PXnbK1qjDNS78SJ9YZM2/3qRte30NwY2Hh4l6lTR4f/nbv29  
YYzQ+7NJ6cuhOnz2iKVs7g8GMjvvjtrk6fBPn6Baxk8Q9xk1WJ/p0eEf0aQE  
O/0i+DEW3BAuqcvfzyefUJ1mYN9a8d23qbr82K3mt8dnGCjYfXnU0l+Xv33K  
rPX5Hyle3yTpsQRd/lam6cz5WSIfXU+D6+m6fE8jE7Wdcwzc+uDdCRu2Lt+p  
fg3NToCJ2RFtu5lcXT6EG0XJCTIx+c64+VG6Lp8kuJo+vJCMpZVcyRvl6+f  
Y/C4XJij8rzDx25E6fLVLFxfM0SYijKBN3guunyFN3qC4YuZ+LFy7Vuehi5f  
Im6lnuUSJtorfQs9PqbDF5LQdZdYykr+ijjP5qEO/0++dnyfBBMTg/z5/+3S  
4Y+v1cp6LMXEu5oc3TQNHf7gj42K0zJMzDLbpdPq83vOaw+GCjLROvZK6Ne  
kdr8dqUV4mbyTJwdHOqfntXi1z9abiqiyET/wN/uvJNa/ApP1c3vlji4tfHs  
QQIRLf6Tb8rJhSpMHMzye2CZrMm/m66Ul7aciYdlao6/hzX4eTqK9ZtWMPHe  
wnMpK101+FmV8uMGGkyMiwu+feWyOp8RICcvoMVEvY7LpvTuFfxkjkzITV0m  
1tp3NC6tUeWT9g0b5ekxsSVaUeLAIDJ/xLvi7yV9Jg6U/ixXWKLE95GN5fCM  
mBjqzFH9XJ8sX2ySFsIyZuJpj00FRXky/Io2lTWZpkwsm9Tcnu8ixTdk1dWe  
IDPx2OGobxtSF/H74nI5RylM9L590fjfigV8ntf+kGRLAv89S5dLi0yXC8ro  
zO4Djh6pSyhZHlpg00U/sibMkYnt6DdfvXIJZOzeNBvsxMSC8NjNzy2lgeZh  
VOfvwkSDpKLQ2QVycE/yfYi30xNDrs/2vvqpCicyLLgOvkw8dW9dqc2CIUA6  
+31WI5yJu9dz05xrSTAS/aJueSQtg2sHr5rOm8Ml12yuUhQTb9NC3h2nWIDY  
Ehdj6Vgmdt9/YHXhPhU+pV8LFUgg+AsqevrgCUDGSf/6D8eZaHems+xdHA1o  
EWa87pNMPogqj+cptxb+OIptf5POxNeRF5duerIWwhYV/2s6x8Rze3Y+vfXb  
EayPLzMp5zBRjn95nhfvDMNH63kXrxF6dl2mesjQHZ6veHli3w0mSvHkBg2L



3CGnrHLfhnwmthrxuyTJG8B7qnjjwtMFDhxZdsSVQ/g77ghGf2QiaL75zR2  
SHvC+UVX52iPmfjqlKBAr6sn7L2a802tmImhp1QTFY97gl4Pp6G1lNDDQ7MD  
tyY8geVx7KRlNRMvJm5m6FZ4Qey3lATZF0xsvL9PjMPMC5xOJ4V9f8nEX5e+  
FoUu3whz1XE0V+qZGDR/lG0UvxHeBseaHmpkorPmrwSJ/zbCg387NHybmSgR  
uK3U5PIGiLTYNr+4lYIKKV8fFiz1Bvt2/+ /9bUyc/HvNQN7YG5bv2dxT3sHE  
4hUOzqMe3jCz1LuR10ngu3rPOZ3d3tBasKF0TxcT4yM+7H96zhvurHMtch1H  
3C9NPXU13xtODThe00kh6mPnGuiq9gYbNdf9ZH0By43L4hPeINiKTX8QR8T  
UzxOwl8RH/i5ydz3AATO2VLTyqq+EDTpDEtYpDgp/vHpL+hD9xkGJrZDTHx  
xECXcKWVDxw10tNUGSHqe5+GpY2zDwQ0aEn/+spE4dcJ0vXePkCjXCHw6hsR  
H/XUkuBAH5ARVhm7OcbE4R8Lb06H+cDoZfkPR38Q9W1zPjw92gdqQKbJf4KJ  
FYETL5fu8oEr75aWkX8xUfBCtdPh3T5wKHHxLalpJsqueRLdQqxvkhPOGpkh  
/IUeKpyP8QHTIoH0538IPR+sZC2M9AHxDbP7c2aZePkR6Xx7sA98+TodnjH  
xO2bj1lHb/KBqlMTPI4CLCy8FihQ4eoD2TpjNENBFh78uCe0wcYH9leNmC0S  
YmGBa8zn46t9wCtoUPOjMAvN9WeFh5R9wHD2k/RTERYqP3tFGxH2AZELPQLs  
xSw0W8/ROP7dG/rMu8Z2LmHhYYW/KvfbvaGstf3DuqUs/B1c+CC82Bu4u1qa  
NCRZeCYmODLNgjfsEW8s+yvFQpnDZSUeid7gll9zq00GhZkde1YmeHuDrMn1  
VqEsC8VKjExEjLxhQT8/PV2eha5Rl31nhbzhfcrTxFBFfM4yTFRw79oIjL7  
vgqqLLz/XSxq+MBG0M86Pqqoxs12s2t2hXYb4fnBLUeV1VIY7Nr8z2LRRpix  
WnB3uTYLKyivk9HHvYcp2uGwQpeFjGNhRSH0AsN/N7vU9Vi4yrZxnDLtCcF8  
D2FtQxZWhb822+jnCX9ytC/qGLFQRb0w5quoJ7BTZoxXGrMwZzLpYNJDD6jF  
XH99EgsFLl/6uHSRB6ypHntgbM3Ci7W7WjNWr4faq9XOpsBCm5uxT9p2uUHI  
MV6vGbLQ+jjsM7vnCty1tkssaCxUza6X2WLoAnM1GSE2biwkT3/+3aa0Dpoa  
V0u7+LNQw/RJlt0iOwi/s+CGayALLbPnG0tdEAQyOqzXB7NwRPftLuWLZA2

HI702M5COymzk80brKF5jeecZzgLW+MGIs6NWUKklA57YyQL6x79GtjCpUL2  
68ZnvjEsdMvT73f8SwZyUa7P5lgWnnpQ8/fQU3NoYcZ/3bKb4CvqSe/XoyQQ  
8lZVCIhn4VZeKuWSiSnkkMZvByYQ/nd30H4rmgBF7rl9cCIL95XEuj5ZYgzR  
b6JjQw+xkFJROyprYAhCT2yFwpJZeNohfnuUnz7k8JZlhR9hobgZ3ejDdT2g  
JH5ZE3mUhcETnL7jEiuhdXPpix3HCDyG5hT2s3QghprpF32Chfb7aOE1ZG1Y  
pBz6I+YUwedc7/azvzUh9w/5ZOxpFrbbPHN88U4DLN+JLd99loj3RdKD+VZ1  
aC/9ULQng4VDRyX2tRevgNjsIqe9dBYa/pjIWz2+HEQPn/gQz2Th5pC3/UZu  
qnAlYGt8ApvAJ3RUbbZRGazBSCyRy8LxI8EOJXFK8EZNMPfAeeK8UxictlGE  
3fMd5klZLGxZa/CPuVoBFn/MbziUTcQn0h8zbS8P1wvMhPflsHC3yNDS5aly  
YL+vHHbmsrBRcZCe3i8LvbbEsOusPDtuNOvwChZOCT2+n5AHgsVHQ9ZPpOT  
BaWOrV99rrPwYfPXoMbPy+DxpQFt95ss/IgLw252L4ONUbGBjgXE/V5Gzvsm  
l8E4aYYHt1l48+nbJT5msnBuPvU1+S4L6Uaxt3fwZEG/fsmSNfdY+Hz7Vv00  
dTmoYXNoK4tYGLNs8fGSV3KwPWhF8oqHLLw3/rmUkicPC/Tznyg8ZmFzkX9z  
fl4C5Eya/pAsZmGtZfDpJl8Rrj6V6Ys+ZeFM+cu0W0LK8DbdcbtAGQuP7GXo  
jOxWgX3eLf/NIBP6GszL3blwOcis2No5/oyF2BQzualMDQqH+6WgK1k4GqtP  
/7xeHdwe7nT5VM1Cq4gBxqSHBgwnT6d1vSDy0Vee3xGhCsecU8tf17DQkZ3a  
6cvQgmcf2MZVDSx88aKstnuFLvjnq0U9bSL6H232I+vYSpjZe/Nq0SsWTrfT  
QkX/6YHp4jL5q20s3HGxNi9ilSG8alvrcbGD0POJXaHxPashJudVOquThZo/  
pk4fubYGrpv1z6a9Y2HUpmfp34pNwGEuhnyoh4Wm/r9KdEpN4WPt1K74XhZm  
+4rkpNSYgXKgWP/2fham9umnPp0zh4xTJnVrvxLx+Gikvey1hH09KRyRvwT+  
uv9ajlbZg8zNxa/mZ1l4tibg0pvdDnA3jiU6M0fwZRwXv2gFDYZEbiQNCbLx  
1cT0fPmBteBv2rytToyNj/3sqV9WOMHv2U0XK8XZeCxYvHvfcyfg1nxqL5Fg  
426/paqR4c7Q4v9rXYEMGyPqf3lYXXYB2klVozPKbNS9baAyPewGiyQb0rep

stF6cxRnWSTRv7gHPluosdHtZ2NN7af14Hb9TfaABrE+0pw/+9IdJlyOzzzV  
YqP4izcL/5psgJZHZt4MHTYWn2yLYvA2wMYX9CWwio36QdBdpecBsuttI2QN  
2Hipszb3vpcHvGn/VjViyEYx07JizAEPOO+frVZpxMbMp+oGrdkesHXA5SDP  
mI07QzWfV5d5gGrM746dpmzs2drRpN7lAR8mbpjQSGxcXtFmWvfDA3KTfM8p  
k9m4o+hJT/YiTwhZKDw8bsHGfx4qJUkKnqB95gGthspG+dLzhWu1PWFQJiT3  
Pys2jknW3+o29ISbWVKze23Y+DzW+byyiSdEaT7b5GLLxrape0GfjT3BsGDn  
A3U7NvrWZIOqE/u/m6hKTtuz8cx87qqLmp5wr6Q+qonGxrv8gAWOsp6wx+7A  
y6u0bOxzPrR4bIEnmNat1DzoxMbTWe4eP0c9YNLjzWEPFzYGXJyzCuzwgMdv  
j3XpurGx9NMpTyj1gMRgM/N/69k4JTgil5PjAZZDn+htG9gYylaTSE/xgNld  
9NF8Tzb6GGg9Ewv0gCMp3676+hD5PcsIEpD1AHuR7HnDTWxUauq5L9+5AYQy  
XfwWbmHjndea8Dh1A5zKuSFzz5/Qw/UVrt/r3MFF1zf2RCAbuxvqeh9GuIP4  
XaF6/2A2Mj17zLctclfM8m2pi7ez8YaejnuN3nrwWCvV0xtG4PHKVbvwsRsx  
7fApjPYmH+kov8tugH3vcp4SDQbz91NdHR3cYWcvx2BZXFsvPBpe9FakjME  
px17yoxn49Z065HK606gucRMfkcCG0kMAz+KvBNcV6Y3yR1kY0c0SWr3qCPc  
obpY70ol4p02+ZCZSIOy/XwlTTobh3ZXn9y7DsDGYa2qOpPIr6g37leVNfAl  
GtXU2Gz0/u+ibbWlFVRc69JSPk/oWX4ofrU6BV60Ta6WyWWjoPkZyfxaE3C8  
lGQsdYWN7f7+tVOGxlAbJWgmkcDgy11N4wFaq6F+gRRF7CYbPYzoubTPusT3  
1cBe8B4bTU8Wsueq5GHD3/s0gSJC7wvcH65PkYaWl5R1cw/YGP/39Oqyr6Lg  
yXzmPPuIjYqL3rW5FczZtAY4uv15wsbEdFk4JjZss3FVvk/tMCRsrRranRKi3  
lrdPbvScKmXj+TC3tdTYyXLfiu6Nk+VstFUclK/JWMDvPLPN9+czNkqWj2xd  
6yDK37xpaPN4JRubL/4810Imwe/W3OX3vZqN7+VzXrS8lub7ff8VMPqCjct+  
CtbPrJdlvy85FDxSw0Y/1ZrWWXF5fsDxhaFDdWyUer044jdbgf/B43TYYAMb  
Ga4jS5c8VOQHqUpHDjSx0armpLt7uBL/4xdeVN8rNsakLLjXe00Jv+2B2s6P

r9mYVphQ8i5eid+XfG3XhzaiXpmLfgbWKfjDXQzj3new8e32lo/HLyvwB+Qe  
xHd3EvUVPCG+87ccP+wTdf/bLjbKvvYkCQws4w/erjjw5h2hB3ttuY4r0vxh  
h+bk1l42ttROim+OWsyPkvRJbfnExpmhF3d/qgrxR7vfpTX3E/43kShDRv/K  
v+8ZPIX/hY3Bf2bfVHV3lv+8JMSqGmPjWZ7SWbVeYdgbfYZT8YYPQg+jKNBIX  
cZgky5znT7DxlOmLjpBgaZhqWvHf02k2Pn0UtE6tSwH+/rW8UTTPRr2LU9sb  
7TXhUE1l/r0FHGzkXxUsqdWCOabT7bsLOci78v5r8lodEND3vV8gwkHFurPB  
Dcv1QGjzntIrkhxcdG8uaYTQU8FH1Y/J0hz0jmLee0oyAo8dtUJ+yzh4b+hM  
0pztGsg+uMJ9mQIHfz69qKV2xRjsFzbEjSlycDeLK2CqZgJDZxJ4DcocVBsX  
CbnDNQHSf00f09Q4aPSWES16yBS6dQ4IB6tzMI/kNp48ZApH7mrrW2tyM05J  
RdFpDzNofJa0d1KHg5RWIYJMGRLE0a0837KSg45WeaUrYkig+Lq17PYqDrbG  
6D+PqyBBWN+qRWGrOfioYe/ezM3mIB7doW+3hoNK9W+nxi6aQ9HEkQ3LTTg4  
Z5qib9dlDpsPGcb/NuXgsrEnh9ylyDAn9PZ8B4mDfYNtfv1IhrxzaeX3yRyi  
v2mTG6LI4CK/pu8chYNdBr8PvD5HhvGc7kVrIhyUdcnjVOaTgbvyhIGjNQdN  
HBOmw/lksL5n4qEJHHwqWrH0XAMZ+ig98XO2HLQ82Oo430KGU5WnLnTbcdAq  
bU4qvZkMRi4k/mMHDq4V53T/qiZDe2tvH3MtB5em9C0UfECGg35nRHat42CM  
+I3C3EtkUB8gG7o6c5Al9vyVxmkyvlzp81jpSuDXm/apOI4MMb/07Vu4no0/  
x41DLmwhg0wyNavXneD7mtyrKSBDYCa9n+fFwQ9nC00mhMkwfR8SRLdy8NkR  
J52C0+aQYzmSNeDHQYumjtJl0eZAq+Y8qwjgYPfXb3pcV3Ogt4+KHTjGwVUW  
Q0kPlpoDOeD8ap9QDj5eE+T/alwE7z87eJmEcXA587RoTisJ9KazLg5HctDc  
UK/kx0USNKc4VryI4mDNmjXF1cT8Hi/6c+ByDKEnkmyiSzQJlBn/LU605eCN  
yxoJJT4kqFByNtq6m4Nv3l1eQ7MnQfiVSS9yHAd30vdqqJmQQNwgd79MPAeD  
PLTrD2qSoOiBa/b3fRzM8i29dk6eBJutpyvq93NQsuq7yemlJjh7fuXz9QMc  
vDsjOnpVhAR5693F0pI4eD3hhfKDhSRwefPbK0gwoV8raYE782YwHnhto1UK

Bz8FTVvm/jUD7hePRIVUDr5sk3p0ZdoMrHfPZk8c5eDl41Ob6ifMoG/mRuWr  
Yxx03m63dPW4GaSnbhy8dYKDjMDT/I+jZmA6+fBu8ilCj/5mNaIjZvA+XH6/  
52li3XLllptfzOB4135b7bMc/PxfjlL7ZzMwcusSmT7HQc7q1ju5A2bQybds  
qcvklJX+56kmYR8xyT6fzSDwiPEYjCXsVXn/gnexOFgXKd5xgTjfkH+0yp7D  
wRGDCMNiwn9SesUPWR4HI/0vMD4Q92vPajz9cp7QQ+67fI0xM2iOTTv6NIuD  
w5fClbmTZrD/04DLuWwCD4G9pzyI/NW9HZcF5xD1FUm9EEbgVf/yxjvTXA4m  
Jf/8MSxOgr3UxXnCV4j6HH5j8VOBBKq3o2LeXiX05bFCiqVNghdqjaRb1zj4  
bouQ+idTEsQyVv87fIODlbf44j8IfhWEMI945HNQ7NuJpE5vgv+E8XNatzjo  
8ZwjnR9Jgh3Dnr5Ttzm45q1W/MFkEsj4P1Cru8tBfLXDKZhL9A07hMLYIg7u  
WSDwrrSRBBIPO/fbPST0mV7Zv/UrCYp1qSj7mIMFmcsngsXNQUx8tqWkhNDb  
3ZNPJ33M4UFywIWzpRz83rvpfXKyOfj/4G8LKudgy1ZRq94b5nD3TepPoUoO  
Np8Zlb3z1xw2Ofc/7awi/B8+u/uvDhkEymhpBc+JfA8PCRz0IIPXZRFZj1oO  
1q+4c6TuGlFv0efML74i8DX2tp/bYAG5H77/2/mag6Nvn6UrH7QAF0+PI9jG  
wQ3J50+OXLWAbPKyTYNv00hP2RERMWUBuOBCoskHDm4s3PtPnUOB4b1/UOgj  
B5+cMIWVpRRgDvot7vzEwUwXySfbP1JgoEEt69BnDhpK/pVep0eFc3AkZMMX  
Dpa5JrQ3ulCBfP+TvuYw0e9Hv2S6xlAhnZtXWjNK4Pn6RNGvW1TiPbLoWNZ3  
Drp7qv9ZUE+F90kRbjvHie/FnVN/awepcPx7rSz+5KCx4JSulaAlGG3T75GZ  
5GBFbM6ok6oldLadufb5FwezpYrL+kiWcMTx287iaQ7eFD4g8tvVEloN7s0F  
/OXgl+C6Jv99lmDZN7xz8z80CgT8MTJPt4Sr57V6vOY5+CL1xLFrFy1BfEOA  
2/oFXOyh6e97eNsS4oV5pesWctFWfDw6rMwS3pe26NsLc/GXTV9bab0l0OLE  
sqxFuDhvu0SxtNMSbuvRFlss5mJg4r6r4f2WINd7ONFkCRfl1ht8qvxmCcmc  
J18MlnJRXdvCumXKEgZdf/jqSnIxKfTqCs6cJbgLGrxUl+aiwZ6DU8uEreBx  
8XZzlWVcNHnw0sBDzArUduXkyclx8WwmU3+9hBWc1Hm7TEqBizYxQwES0lYw

/k46TUyji7TCVmOejBVszrr+FFLh4iW+n8RXwq5wOr5tXpWLnGIz25YS9qp5  
fstvNS5u7t7LWSBIBcxHM7aT6lx8VKQg1yBuBX+iTQu/a3IxaizNdaeoFYRo  
xqgNa3MxYarq6ldBK6h/e+1cvy4Xu1b3nnKetQTTzN7ZHj0usv/2hZ2etISL  
a5Vi3upz8cqLt9fuf7UEoVmvd62GXBT5Wf+g6pMlxBSddWky4mL9YPWfijeW  
0B75sqTGmIsDi5s/FxL4Wq8QWfVlysVNIR09zHJLyOugni8jcVFrr633zkJL  
WHp2r8gTMhfxeOkd+1xL+DAz+PmWJRfPhcSWfU22BMdCdZ/r1lws/12y7mWM  
JRSGbX2eC1xcsmP6v+IthF5am65w7LloERC0KMDEEjRuPwxKceHiRpULQpLd  
VDgd8r35gBsX/+Sp9/pXU+Gnoh7Eu3NR92n16803qVB1/KLqDi8u6pWZrmck  
U2F70NEur60E/6zM8khtKjTKlTmt9+di6rfmAyUSVDBv/PVkXSAXT9u8GT73  
mwKLqDu41iFcfDwpY6b8mgKxY1eELbZzcV+CmdlcOQU6r72PNwkn8tf6SeLf  
osBNGY+NulFc/Gymfkb/NAWk6tKr1G04uLro4KKFSRQ4kFJtohLLxTd059eS  
OynQZ/4vV243F80DB0fDgyngMkqWkorj4uU85atqPhQourI7RSyei0GTIq/d  
XCmgvKXgu1ACFyu6bLNFHChwVHIgYH4/F6X7LBTDrCnw9cXypt8HiPNZYzuT  
LCiQSD0U2JpE3Nem+PgEicjnTvdYwWEuHh18K2RhRgGWOjU1LYWLC4rTZLUI  
W53Nk/FP5WLMtc8r2gj7rsjUVVlawUf41BiYU8Aqydt86XGC3/t31gcS/mu/  
F738fIKLszYLBVdZUsA3RHoz/xQXP1Z/7+DaUKC/Y9cw9zQR358I5iU7Cux2  
bj646ywX3/LCBawcKTBXZijulMHFI959Q8FEfmeMz/ynTuei65dW2cWeFFDM  
Gzb6zSD4ETFeb7CJAtcVnCpes7gYG/Nj67MACITMcfUf5RF6/5SirBpDAfe4  
0Hi/C1xcGWwd2L6XAU8+VwqTLnIxT8D6Yg+B/1Rjst7nHIKPY/3aVWcpYHBx  
Zue661w0vvx1z7d7FOBajM4secRFJ0ZuQ/ZfCmjfcjk98JiLLvJ30k8LUeG+  
Wr5KeTEX000SYxyXEvoRDofYMi5+E1nlLaxGhQXtvWkt1cT92QnxcjZUyFgH  
cvkvuEjNszW9TaOCamn29dQaLj5IUUvRcyP675UtdaYNXPzCdgx/tJUKz+WK  
ty5p4uITzGt5so0Knunyo/3NXFyYh1FpkVSI2d0mwWkl/O0LbNiyjwq/+01y

d7Zz0chnMsQ3iQonNtFNHN9wkd/yo27+CBVkg75Xqb3l4qT6tiH3E1S4DOu9  
p7u42JLsdt36DBWMim59fvWOi/5a/K+VmVQo0xHbf7OH6AfrKnI7WVRwvhAp  
mtrLxavaAXcSeFR4I15zYcsnot9M5PzmZRH1dETHwLSfi/9GM3eS/qPCj4m0  
MrHPXAxssfxBu0SF5li+9f2DhB5pN2Oqcqkg/g57S4e4WCk7UHPtMhUuuF/a  
zR7hYu3E9MgXwtat+rdg5yjRD5S/l6cS9kNzf9ba71y8UdWiF0Oct8t/qq02  
zsUM7YJluTlUKL4kcnv1Ty7KR1w151+kgjHX28xmktCfl6fFIBHvjbOXn7pN  
cVHn0XILCSiftbTvdv4zXFT0C9xmeI4KnANWddF/uPhd+mQTmcBHFpCpj6RZ  
LvZen87VIvpFWnhH5+k5Li7/wv43FE+FP/6aQVkcPPx4yUH4cBQV9mzcNZgv  
yMMsi4XjikFUGHIu21kixEOvA/ebVDcSeJF9D70V5WF3TPoVFpUKRVKnL8hL  
8/C9qkXJ//9/WSXSqa67jIdHZaU6xScokPtP66a5HA9vlqR1WwxQIGOk/LG3  
Eg/Tnyu62L6kQPTzh21MDR7qfF7cdoboL31Pwe+Kfg/9PWu1/xD63nr/TN99  
HR6S3r1vuEH0F6ccnR8tq3goJDD4eooqop2fsuMSPBjycT6gTf0CjAPnMs/mx  
1Twsrv7oPUDUs3biFglJux7u5556/m4FBS7GXueokYj7Z0Rqy2QpIBM2oWpE  
5uHOofN0JzEKpPthng2Fh6vaTc+eFaCagNc5g/WWPKxa1aTHnbaA/U7drf7W  
PLTZFNQeN2YB32GlZQzw8FL9x9k1QxYQbh5fmYQ8/PrDSerdJwvoMah00mPP  
Q00rZEop7y3AW10ijYvGw1RSY+NcpwU0KvptKnDk4WvBseSJNgtwkLz5ocSJ  
h/YiKl/9WizgqfCvsDoXAp9UuzuLJgswmbX79taNh82FCveP1VvAzZ8Z8UPu  
PMxsvR3lUGsBK4bf/Z324GGZXvt/cS8tgNurlyaykYf5P3YdlH5hAUvf7BNT  
8CHsmBDjFc8t4FhjFUN3Ew+lus6NZVVbwN8qSSXyFh4aJ7R/SSPsubL/3LV+  
PAxMU3TuluzhwvyVPgE8HLW1dsgizgdfn7q7PYiHa75qLHpj+O/MdiDHb+Ph  
wee3Kv1qLMCDrs9PC+XhiiVl17bWWcCL9B4aK4yHe+dIfZUNFmB9RL/xSgQP  
63pmrtObLeBBwv6NRTt4GD80rPXytQXo73zeXRnNw9qAkVPbOizgcqh0yOud  
PFQ6/F44pMsCFLcGDn/cxcOS41fqX/ZYAN3j1u7xPTYce6wmktlnASLrZqbn

9/KQ4mH2teSLBfwPQt176w==

"[]},

{RGBColor[0.880722, 0.611041, 0.142051], AbsoluteThickness[1.6], Opacity[1.],  
LineBox[CompressedData["

1:eJwV1Xk4VdsbB3C5pEJkkZlliELGDBm+2KRMxznHMWaeX703aECayFSUOJRL  
pUG4NBGabiNICEWUOY0KRSiXfuf3x3rW83nWP/td33e/S94vmh7ly8PD85K7  
/r8bT77+TorwmPFo8+Qt1TI2G8h6f/VrXJ+ZIOu84taCdUhqll6piPtm1pat  
SRtgqeLFiCEzM27eLF+gU0Kk0wAzPxqlhDhhGjvEN2e83YZjbnXvL5xcgUnZ  
JpdVOTtQXLf8imCYKMa/1osmGNvj0d66zT3iazATtJtarOMEwd/LTXbFScMr  
ef2Rp8IsSLkH8Ly1l8Wz9tDTjbouWNvXO3T2pBwuVPF+e+TsCIUT7YsCYetR  
Nn+WIZ3iDvv53k2d4sqoyvJdmVzihdxEbUN2nDrOuDqp0Kf8UKTed1rBTwNp  
aXZtol7+uNR39L8u+80Qniv0P/fEH71FYwNFJzXBJ9f5gn48AGMLliX8Ydp4  
tVjGU0MgCD9Y65gDA9rgER/2PeiThJnKMb46Zx3sL38m8PtWEHi8C4IizHUR  
9d1wQ5hvMETvj6m+FN+CpXvLpTyKQ7Bm7eM3Fce34Ps33ucVX0IgGV2QkcKn  
D6m2juYA3VAoyhLfDCf0IfmWFbjhUSi2JBVcPdtgiFTVwy1NrWEweh3lu8/E  
CN8P639RXh4Os82EKPOGEE41/eZVtAuHzcBYjEDxVITVfwbJPg6HuxmhHxVn  
gpqCFL7OCxHQOLqxSGvaBC1X9wz790eA98UK/p+xpmD7/XQ+tSYS5V59HfGx  
ZrgdMi84eygSC6ZbbxH1wAlK9+Zxuyh88qsMU/4NeAy0efylj0JHirzMEiNz  
VBde6NAoi8LlVoHkpjzMCnbwh1/RYPm9YpOr7PAzbK59lul0TA6tG2x7i8L  
TEknVaW/ilbipfo6MUNLpKpEdgX8jMavb2flemotkRz3lne9LBvnEyPHvGsJ  
FH4bFzxs0bmucFz5rMEyngUHVSbMQ9YTgrGFiBrJIZ6jjlhq2w0Z0Pt6zg  
rpR5LaKYjanCxemRt6xxf508Kd7FRv+/e00cZ6wxEmPO6htmo3Hk64Sm/jb8  
Nz0jsWOcjb/VXrpM1WzDja1zixUESFjfkVakr7FBVuRvKz4dEpqDoj2e0zbY



osQ3ZmRCQoIvJdN0y3aksgv2bNhGYtw2YnJRzXYM/CmpVXEnkf/W4EFq9Q4E  
RF75PJVA4tCf8l1hP3dgjqdOkD+ZRISCrIqdni1MCx2HuzJmIfzZ4IU28Jm  
sqH/8RkSall7LL5P2SLxuGXSu/Mk1twY/dmhawe6THhf4xUSX363e+bdtlOv  
hGXD1xoSr2SsVuyZssPmDE6T+l0S9yxqH7np2q0A9k+Q0SMSJ90LNkrftMdq  
69KL9a0kktkqEz5bccMALpo907DsSj4djj7aPO2Dvm7FrQx9J2JUf+DS+0RGT  
LyYfbPhKwss4r3vreUfkKzTSLKdIfOQ71zbU54jA5U32ErMkaj84jzwSosHi  
UPnDljlpuVU+vaE2NHQP1C1r4aWQsiqo2ziIhlzDeVOJxRSe7w5/JXKEhoI3  
NVXWSynQEddcfZ+GizSdbjMRCnkX4htT+2hoYD7rFhal8HbJwcceczT4LsRf  
vruaQkB7xp1F+k5wo4doP1lHoVTvR00rphNOfcNqGskK3wrybl6mnFCWKizp  
IUMhzu9chX0l99zNseXwegr1Ty+VyjU7YaG3LletSGFhY8WFyc9OYM89vWmp  
TOHoZE1hgRldeck58sWqFJpd7uRHWNJx7Fuev8omCivuPDhl5ktHbTnxu0CN  
AlOuIVs0iY7Ivxy8p9Qp5B9pznxfSAevQYCQwWYKvZ/aU2vr6WjKNlgP1KQg  
b//6SEY3HeQ1ZaVELQpB13oPeE3T8bx0Z3ySNoUyseEErdUMVCwMfYjQoTC2  
9+MePm0GCJnANitdCjr9X3e9dmTgHpV/dpkehT0WP9hllkQxYB6v/e5vr05dm  
IhIzGFgS3Mlx20KBR3A+hHaFAc0+8+wRrolo3kCFBgaEy36l7NSnkPpSwHd6  
hIFkP07MI65b9IV3PunlwmUrxMQNKlgWiroVyjExZbHg4ME1i0fcOdqUiZaj  
w/uOcx06QNrJwpMJhvjCj0qu+xvX24vtY2Ka12/lv1yvV1fZ/onDRNa7qc0P  
uA4+oW51u5qJTfNCJde5rvipbX78JRMtNxNrT3E94WZg4vudCbOwh3eDuda9  
Z2KoK+KMfQksHjWu96631BNQdwaPbXXLEPd776XYaL3Z4QxdPfeYNK55R+3V  
/wlxRtzpf00VuLZ2ZKgeSHFG5w7hhCpu/ek3XJUyF5yR6qDH1uC6da2XvPJD  
Z/RyDuw8y72/VQn+0r8GnFGQe/0oP9eugyHrmuedkV/J0vTi3n8hESVWLMnC  
pV/U6TJuPorCe4WtXFhgrim6K8vNL4Tcv1Q8lgU7YbFZG26+/3Qe5h89yQL/  
vUffg7j5byk6Pp/dysLrr/JLDmlQKD//Q7d1lIve8f8eHuH2j9xlvOTgUhdo

STJSE7n9JXhV5m2ypQtC388tpW+kMPigsZfrQuWLF00y1Si4PxUdOJWpwty  
eVt6CG4/P38et+HnDxc0f4ydnuL2e/VL07xodVfUKmzNNZbj1v++NSbgvCtG  
f72ciZSg8Oezdvm5+66QHfau+ChOYddY3nB/ryu+ZCwxdl9LwXvGy8ltrRs+  
rP6ctpH7/+kuHddwyHSDDE39brwwN281kS/6ce4wM8SihQUSDK0Y+dgcd+xX  
tygVmyfRqPfa9fpVd3inDBqocOfDDdPiBrVRd0w83XzUdIZEKm3zRXkfdxjo  
XLmgPU5Ce5ejj+AOT0Rk9Kc59JNiUz3V1S/thfLnDQ5f6rjzdm53fj6JF7zT  
VYVcb5FwNfaRc9jphU1+8r0Pb5LYeFcz7G6hFxxYMnNZVSRe3GufPyPpjfs6  
WsrLLpIQGko7WSHkg2f5TY2ZWSRYI011oct88VhY31rDnztfvzguGeH3h1pY  
0aQq9z34bd4xJIUXBIbmbh9OuLKRvrY3ueR2GPh8/+6IMI2G3mRdKlkehTTb  
yknrwUGeCqV9ebCjhPf17IG5SxFg989+ilVj8Fgh8ViBbzii05WECP5YmLc7  
VHaZhiHhhfH7utdx6Bn4lZmkHopnqZy8rvY9qJFprlxfGYJlwVURYmX7YFsa  
p/pkVTay+AQl564k4lyYoH26UBAkLtKSjpdD+0/OvJpYoFwqFblyzc6gAaV  
vTHfDAJQNdos+8DgIEIJF8kuhj/Sm1t3zykdwniwqcTGo37gP/hDeemGwwiQ  
b1s8ft0XAvqC10IUjsCO9ffb1lEfHE46ZN+zPBmfrJcNThj6oPiyJEt6eQqi  
5vmU/uH1hp7fKpL6LwUjb162PqvdyX2nelLXFtiK/JJvcVcPeUKkfvmznHep  
UD7tXn4MHRd+FG8i25aGz6WCIU/l3CE9vUxmf1s6Qld9ESamXRHPn9Wj0ZyB  
76fP2m/qdwHjMnl5oiYTyYwI9sI7FppU4oaSq49hjtBQMh90xj3jHnW1kuPo  
92dMaM4yoU/XclbMzMJxm9qRJTJMIJY4T+0mslFdnVbj3MoA9dF8W1B9Nqyt  
zgt3sOkQkjSjmRqdQHegYG1VkrPeccKHi66dQHp0mcDXYRr254r6lSqfxEn2  
olOR2jR8PvScc+biSYSYvfhsOu2AE3XXWGulcuCSmNtXW2mPpYNXmhIKc1Ae  
/rxjuYcdiKNSGhkSp7D6WUy/h5Qt7uy+t2599inwDIBK1/5sB58refu8SC56  
h4du6XbbIO0g40N5Si5Uxp3ytdq2oWPT1YWdc7nY9bHf9K9ua4w+kW75tTcP  
FZ/DPqh2Wch8Sr2izeQE5j+tCOsYJ1BbLFCh/iMPT7S33383SkAzj6ljMpWH

S8E57T8/EpA5PGbuOZuHyOxWNalBAR8913uf5uGgvmW6jmwjcH1FesGalRx8  
NFq8AtcIKO5xWy6izQFPgntNSAyBM1GXcmV0OWA4JIWeiCYgGjgppbGFg6vH  
6Z314QR46Mc22Rtx0Fa+p0skgEDfpgc2GRYcFHK+73vIJJ3oHJYgMGB5ZCl  
xo4tBIS7YpetdebgGI+Q535tAkeaH55QduHAodsdNzQIUHWeZ608OGATfGqy  
Gwg45GTfPezPwWuxpow/awk8SesjcgI5iP8jHG4moDxgY3N54M5WN74dD5m  
BYGNkY/fPAjnwDhtpdXoEgLn/Ff6tUdyEGvrPbuBn4C4u9fnwWgOepJO+wQu  
IpBNK2dPkBzoCZ5LLJm3hMC22Zk/MRzs7KA5Dv+yxP8AGyLnmw==

""]},

{RGBColor[0.560181, 0.691569, 0.194885], AbsoluteThickness[1.6], Opacity[1.],  
LineBox[CompressedData["

1:e]wVx3k4lAkAx/HZjQ6JkMjZSnKHMhLyw+TK5ApbrlzlZlijIteY8aLc5i2V  
cyn00NjhpDYrqehiUzTOjsVKViKlWvvH9/k+n198I5wCfqZQKBHL/X/jjy/+  
ZYhSTCnEugiRFdtMh7PfNkwxB01lNrSGDc8IIPG+fPRI5nvT1r3jY/r3NuDJ  
G8MDp5jfTKPorfu6opSxMntji2euQ95275XhPTuw9oulyW9MeWh1NOpGVJtD  
7pA/5RVdET6UVzMP6ywgNcgfLc3bjA6juu00BhrUTPQqVwUrobO47ir/oiXo  
3/gaz6VVSPqAcUJliC0KT+oZRjK1IP9Lja5ljQOKtQaLtvhqg1qwdOCHmCOq  
BtOW+ujbkaGoW253zBH84unh4jwd0IM+d9+GE6a/W1QIBushoXm64labM8T/  
mFbrlabC3eae9Ll0V2yUujtwOYuKCBvn1IJBV8hGnM3kCBhgwc5RnaXjBmVF  
2nvDGQNIp58109DrBmri2YbSTkO4B/GN60sO4pApzSCcaQKJt+pdpKs7tNPU  
i3XnTZA9v5c/VuaOn5+sF/wUswft7L4Rqyl31HoN9sTFmCKXHTwZleCB73uM  
btBagBz/uJEHZzzh4PWXkxPPHLIivCzlam/sTrFauXPRHHFGSh4S495Qrmrh  
SRpa4N+C6hhticNYfF+6ub/ZArVkyADH4TDKT4ZNezfT0PGnsnBZ52HMnV+Z  
EXbDEsk605c6LvlG6M5xE/sFS5RMhEZ1tfvg/pupGR0DK2hU1V4rHPLBBc1e  
t7nrVhCjrrwQL+ELy9aSrXHXrbGtI7y16YQvzrza1UZcs8Vw9oDLFVM/GMmE

fK5o2o+JZIV98xp/3B2LmbH5sB/DUmQOTrf9YVebNP5B3R5ud+K+Wvb4w8uY  
+9Ko3B6/v8x9PbzoD7P6w/wgawfc8KceHLQKgP+zzNafDBxB1wtmBg0HoEZY  
LF53gzMatDZPhP44Ampx1recx67w5+/4ISkRBM7N7L4heS8ENi3YiLeFYnLS  
fvUbQT9881wgjhhE4otZz7Qc7wgowa3BDi8YyJDisytuBmOoSrflkR0N/Y88  
glEbjSnLz6dCpGMQIJw+2abBwEiZl7BfEhORQ5/HGWrRCHz78Mua+VhEPN8q  
TBOMgUxnr/KoxXHEPzF+y3vBhBlc/K6ePIEHBMnte3YMWV51ovfb4yB0tD5U  
suYEgoR3WIr9HY9MgbWyX6vjIV3pf9pKMgEylQ6JqaUJeO+w7ztfjxH7r6kJ  
nNmdBMVPqrLiUkmoX+je2bYrGZr3Ug8WFCUho/tx7NetKbC9pygkvj4Zgsmz  
Kmu2sWATEnTqXXoyVhmsbQzckoqaYRUd/aVksBJT6P0ibHhofmi3901ByUVZ  
V3kRDgJP2Wpbd6dA31eCEbXEQYNfUfmCOgtOCpSjm96lIdvqpzWLLBZEW0Qe  
5L8m4Ee1Hg0fYcFyPM5E8Wk6YvVM9VfvSIX8vJBCwtMMz05yW3GdSEWcYHa/  
dncmAiLp4zL9qXC+yLg4c/0UmAkMk4nNbHSpMkfZ105D4fiIMzOEjdvG/Vqa  
FVkiB+u5WB0bBk66LsqnsVfon0VC/RQblypc5mJpOUhyvLazTYuDqL/NrI60  
5KDro8qu0aMcCMuaOuzZnYvUwIzG3d85eE2GjBU35mKgovuD5AAHCYXivpdU  
8rDkNO98WzgNEykPyXOVeahnaei6m6Uhl9foKiWXj/vUmnUekWIYM1LdFX8+  
H1LOibMyZWmgpclpZ8oUoNnOo+jF4zS0xt7epJRTgNm9TnONC2kQ+JVxs1y0  
EPeITB5uUiKQnuz8rpZTiIzjp+2/WRHo0Wj47vm1EM/mPKnnQgj80yH/aPE4  
F78JvaSfzyFgVt2irDDDxVSA6JOaRgLNJasua81ycWZ0wtLoCgEd7oEdJnNc  
JG8pr+hatgJr2szjMxfCSXfWTjUR+OKh5F1EISFoSSM1rh04sj7j7EYxEhu1  
+SWVLQSUjx0UEdUjMbM9vIjdTuBceFWhwk4StnZPbojfJSAe8FF0m0qCDK5v  
KVk2xem0Bn03ifpmCoPXQWBQo80605yE+VR06T+dBLjDqqxVziSuXp4X2ddN  
YF1fjJCUC4mssAucvmWndv+Zq+JGIttT/I3PIwJRPI/Sve4klLxPOBx7TGB/  
fs4tlh+JPZ+6PlQ8JdCRPkjLDyCx2jiMq/2MgHGSEnf5URLaAyu28JatHnZ3

```
oC2ERFWD8vSjHgJlfmK+z8JICDQ1a/7aS0D6kNfESASJl6UujmPLznGozZxh
kFD1pniE/kVgldXnhR/RJBZ7btnNL/s/TCc0EA==
"]]]],
AspectRatio->0.6180339887498948,
Axes->{True, True},
AxesLabel->{None, None},
AxesOrigin->{0, 0},
DisplayFunction->Identity,
Frame->{{False, False}, {False, False}},
FrameLabel->{{None, None}, {None, None}},
FrameTicks->{{Automatic, Automatic}, {Automatic, Automatic}},
GridLines->{None, None},
GridLinesStyle->Directive[GrayLevel[0.5, 0.4]],
Method->{},
PlotRange->{{0, 1650.01385}, {0, 860.7571619}},
PlotRangeClipping->True,
PlotRangePadding->{{Scaled[0.02], Scaled[0.02]}, {Scaled[0.02], Scaled[0.05]}},
Ticks->{Automatic, Automatic}\) \!\(\^*
GraphicsBox[{{},
{RGBColor[0.368417, 0.506779, 0.709798], PointSize[0.6], AbsoluteThickness[1.6],
EdgeForm[{{GrayLevel[0], Opacity[0.3]}},
{RGBColor[0.368417, 0.506779, 0.709798], PointSize[0.6], AbsoluteThickness[1.6],
EdgeForm[{{GrayLevel[0], Opacity[0.3]}}, PointBox[NCache[{Scaled[{Rational[1, 2],
Rational[1, 2]}]}, {Scaled[{0.5, 0.5}]}]}]}]}],
```

AspectRatio->Full,

BaselinePosition->(Scaled[0.1] -> Baseline),

ImagePadding->Automatic,

ImageSize->{10, 10},

PlotRangePadding->None]) blood

\\(\\*

GraphicsBox[{{},

{RGBColor[0.880722, 0.611041, 0.142051], PointSize[0.6], AbsoluteThickness[1.6],  
EdgeForm[{GrayLevel[0], Opacity[0.3]}],

{RGBColor[0.880722, 0.611041, 0.142051], PointSize[0.6], AbsoluteThickness[1.6],  
EdgeForm[{GrayLevel[0], Opacity[0.3]}], PointBox[NCache[{Scaled[{Rational[1, 2],  
Rational[1, 2]}]}, {Scaled[{0.5, 0.5}]}]}]}],

AspectRatio->Full,

BaselinePosition->(Scaled[0.1] -> Baseline),

ImagePadding->Automatic,

ImageSize->{10, 10},

PlotRangePadding->None]) liver

\\(\\*

GraphicsBox[{{},

{RGBColor[0.560181, 0.691569, 0.194885], PointSize[0.6], AbsoluteThickness[1.6],  
EdgeForm[{GrayLevel[0], Opacity[0.3]}],

{RGBColor[0.560181, 0.691569, 0.194885], PointSize[0.6], AbsoluteThickness[1.6],  
EdgeForm[{GrayLevel[0], Opacity[0.3]}], PointBox[NCache[{Scaled[{Rational[1, 2],  
Rational[1, 2]}]}, {Scaled[{0.5, 0.5}]}]}]}],

AspectRatio->Full,

BaselinePosition->(Scaled[0.1] -> Baseline),

```
ImagePadding->Automatic,  
ImageSize->{10, 10},  
PlotRangePadding->None]\)      gi
```

```
(*-----  
-----  
-----next mouse*)
```

```
vn=readTac["C:\\Users\\exx\\Downloads\\plusminM8, Liver 1.619875, GI  
1.127125, ID 3774.csv"];
```

```
Lv=1.619875;
```

```
Gv=1.127125;
```

```
id=3774;
```

```
vn[[1]][[1]]
```

```
{{10,191.539},{30,769.676},{50,767.257},{70,279.979},{90,110.714},{110,70.8458},  
{130,55.0586},{150,43.9727},{170,37.8258},{190,32.7774},{210,30.3351},{230,27.3  
847},{250,23.3477},{270,22.7204},{290,19.6631},{330,17.9345},{390,14.3228},{45  
0,13.5638},{510,13.5121},{570,12.8854},{750,13.7316},{1050,15.7168},{1350,16.6  
178},{1650.04,17.1191}}
```

```
model= mouseModel[Lv,Gv,id,29]
```

```
ParametricFunction[!\(\(*
```

```
GraphicsBox[RasterBox[{{179, 179, 179, 179, 179, 179, 179, 179, 179, 179, 179,  
179}, {179, 180, 180, 180, 179, 179, 179, 179, 179, 179, 179}, {179, 179, 180,  
179, 179, 248, 248, 178, 179, 179, 179, 179}, {179, 179, 180, 179, 179, 253, 248,
```

179, 179, 179, 179, 179}, {179, 179, 179, 179, 179, 248, 248, 179, 179, 179, 179, 179}, {179, 179, 248, 248, 248, 248, 248, 248, 248, 248, 179, 179}, {179, 179, 248, 248, 248, 248, 248, 248, 248, 248, 179, 179}, {179, 179, 248, 248, 248, 248, 248, 248, 179, 179}, {179, 179, 179, 179, 179, 248, 248, 179, 179, 179, 179, 179}, {179, 180, 179, 179, 179, 252, 248, 179, 178, 179, 180, 179}, {179, 180, 180, 179, 179, 248, 248, 179, 180, 180, 180, 179}, {179, 179, 179, 179, 179, 179, 179, 179, 179, 179, 179, 179}, {179, 179, 179, 179, 179, 179, 179, 179, 179, 179, 179, 179}, {{0, 0}, {12, 12}}, {0, 255},

ColorFunction->GrayLevel],

BaselinePosition->Bottom,

ImageSize->{12, 12},

PlotRange->{{0, 12}, {0, 12}}\)\ \!\(\\*

GraphicsBox[{{}, {}],

{GrayLevel[0.55], AbsoluteThickness[1.5], Opacity[1.],  
LineBox[{{9.09090909090909\*^-8, 9.090909090884856\*^-8},  
{0.0874367476365131, 0.08197166587636243}, {0.18222810297558026`,  
0.1358255024317191}, {0.27073779576926765`, 0.13315455086535802`},  
{0.3575112797365835, 0.08143316377978886}, {0.4516394623155443, -  
0.007347854733426912}, {0.5394859823491253, -0.08816932746972758},  
{0.6346872009943513, -0.13787329990112937`}, {0.7281522108132057, -  
0.12816574147938434`}, {0.8153355580866803, -0.07001063326902106},  
{0.9098736039718, 0.02121659675083076}, {0.9999999090909091,  
0.10024804094746914`}}}],

{GrayLevel[0.55], AbsoluteThickness[1.5], Opacity[1.],  
LineBox[{{9.09090909090909\*^-8, 9.090909090880112\*^-8},  
{0.0874367476365131, 0.08090369567458766}, {0.18222810297558026`,  
0.12746559200130417`}, {0.27073779576926765`, 0.1116266937044405},  
{0.3575112797365835, 0.046963725126600256`}, {0.4516394623155443, -  
0.04509050859182233}, {0.5394859823491253, -0.11115559892361665`},  
{0.6346872009943513, -0.12642564594664163`}, {0.7281522108132057, -  
0.07740196037964171}, {0.8153355580866803, 0.004179083230780074},  
{0.9098736039718, 0.08937493944143977}, {0.9999999090909091,  
0.12834702174618903`}}}],

{GrayLevel[0.55], AbsoluteThickness[1.5], Opacity[1.],  
LineBox[{{9.09090909090909\*^-8, 9.090909090875369\*^-8},  
{0.0874367476365131, 0.07984396759533968}, {0.18222810297558026`,  
0.11939549826670079`}, {0.27073779576926765`, 0.09184904274707059},  
{0.3575112797365835, 0.017913117173780694`}, {0.4516394623155443, -  
0.07109962300031061}, {0.5394859823491253, -0.11717052830989395`},



{0.6346872009943513, -0.09879571259704382}, {0.7281522108132057, -0.022693471356141894`}, {0.8153355580866803, 0.06128703302641453}, {0.9098736039718, 0.11605625481609519`}, {0.9999999090909091, 0.10415981267620744`}}},

{GrayLevel[0.55], AbsoluteThickness[1.5], Opacity[1.], LineBox[{{9.09090909090909\*^-8, 9.090909090870287\*^-8}, {0.0874367476365131, 0.07879243663407876}, {0.18222810297558026`, 0.1116081822210312}, {0.27073779576926765`, 0.07372482040530459}, {0.3575112797365835, -0.006267252216927747}, {0.4516394623155443, -0.08743897872291118}, {0.5394859823491253, -0.11109134853087661`}, {0.6346872009943513, -0.06371549528296311}, {0.7281522108132057, 0.02544576624054603}, {0.8153355580866803, 0.09464282937855747}, {0.9098736039718, 0.10731931496853601`}, {0.9999999090909091, 0.0516787429232188}}}],

{GrayLevel[0.55], AbsoluteThickness[1.5], Opacity[1.], LineBox[{{9.09090909090909\*^-8, 9.090909090865543\*^-8}, {0.0874367476365131, 0.07774905743802465}, {0.18222810297558026`, 0.10409673959866513`}, {0.27073779576926765`, 0.05716133039337165}, {0.3575112797365835, -0.026084496726167965`}, {0.4516394623155443, -0.09591154799603378}, {0.5394859823491253, -0.09685594593277226}, {0.6346872009943513, -0.02730376120671303}, {0.7281522108132057, 0.061646715198529656`}, {0.8153355580866803, 0.1046634148537508}, {0.9098736039718, 0.07509702498429204}, {0.9999999090909091, -0.006536873471333553}}}],

{GrayLevel[0.55], AbsoluteThickness[1.5], Opacity[1.], LineBox[{{9.09090909090909\*^-8, 9.0909090908608\*^-8}, {0.0874367476365131, 0.07671378556951527}, {0.18222810297558026`, 0.09685439581479163}, {0.27073779576926765`, 0.042069810325321415`}, {0.3575112797365835, -0.042006785469922474`}, {0.4516394623155443, -0.09808544986431629}, {0.5394859823491253, -0.07760167026270944}, {0.6346872009943513, 0.0063643674428021085`}, {0.7281522108132057, 0.08405712128907425}, {0.8153355580866803, 0.09555213349985489}, {0.9098736039718, 0.03202960165577907}, {0.9999999090909091, -0.054402034659985464`}}}],

AspectRatio->1,

Axes->{False, False},

AxesLabel->{None, None},

AxesOrigin->{0, 0},

Background->GrayLevel[0.93],  
BaseStyle->{FontFamily -> "Arial"},  
DisplayFunction->Identity,  
Frame->{{True, True}, {True, True}},  
FrameLabel->{{None, None}, {None, None}},  
FrameStyle->Directive[Thickness[Tiny], GrayLevel[0.7]],  
FrameTicks->{{None, None}, {None, None}},  
GridLines->{None, None},  
GridLinesStyle->Directive[GrayLevel[0.5, 0.4]],  
ImageSize->{Automatic, 28.4375},  
LabelStyle->{FontFamily -> "Arial"},  
Method->{"ScalingFunctions" -> None},  
PlotRange->{All, All},  
PlotRangeClipping->True,  
PlotRangePadding->{Automatic, Automatic},  
Ticks->{Automatic, Automatic}] \) Expression: {Bl,Li,G}  
Parameters: {k1,k2,k3,k4,k5,k6}

]

Manipulate[Show[ListPlot[vn[[1]],PlotRange->Full,PlotLegends->{"blood","liver","gi"}],Plot[Through[model[k1,k2,k3,k4,k5,k6][t]],{t,0,1500},PlotRange->Full,PlotLegends-

```
>{"Blood","Liver","Gi"}],{k1,0.001,0.2},{k2,0.0001,0.1},{k3,1.*^-6,0.01},{k4,0.001,0.2},{k5,0.0001,0.01},{k6,0.0001,0.01}]
```

```
Manipulate[Show[ListPlot[vn[[1]], PlotRange -> Full,
```

```
PlotLegends -> {"blood", "liver", "gi"}],
```

```
Plot[Through[model[k1, k2, k3, k4, k5, k6][t]], {t, 0, 1500},
```

```
PlotRange -> Full, PlotLegends -> {"Blood", "Liver", "Gi"}]],
```

```
{k1, 0.001, 0.2}, {k2, 0.0001, 0.1}, {k3, 1.*^-6, 0.01}, {k4, 0.001, 0.2},
```

```
{k5, 0.0001, 0.01}, {k6, 0.0001, 0.01}]
```

```
Clear[newmodel]
```

```
newmodel[k1_,k2_,k3_,k4_,k5_,k6_][i_,t_]:=Through[model[k1,k2,k3,k4,k5,k6][t],List][[i]]/;And@@NumericQ/@{k1,k2,k3,k4,k5,k6,i,t};
```

```
fit2=NonlinearModelFit[vn[[2]],{newmodel[k1,k2,k3,k4,k5,k6][i,t],{k1>=0},{k2>0},{k3>=0},{k4>=0},{k5>=0},{k6>=0}},{k1,0.008},{k2,0.0001},{k3,0.0014},{k4,0.001}, {k5,0.008},{k6,0.0001}},{i,t}]
```

NonlinearModelFit::eit: The algorithm does not converge to the tolerance of  $4.806217383937354 \times 10^{-6}$  in 500 iterations. The best estimated solution, with feasibility residual, KKT residual, or complementary residual of  $\{1.59558 \times 10^{-11}, 0.000940882, 4.27901 \times 10^{-12}\}$ , is returned. >>

```
FittedModel[newmodel[0.00514375,5.86338*10^-13,<<22>>,<<22>>,0.0118245,5.86338*10^-13][i,t]]
```

```
{fit2["AdjustedRSquared"],fit2["AIC"]}
```

FittedModel::constr: The property values {AIC} assume an unconstrained model. The results for these properties may not be valid, particularly if the fitted parameters are near a constraint boundary. >>

```
{0.896948,925.396}
```

```
fit2["ParameterTable"]
```

FittedModel::constr: The property values {ParameterTable} assume an unconstrained model. The results for these properties may not be valid, particularly if the fitted parameters are near a constraint boundary. >>

|    | Estimate                  | Standard Error | t-Statistic               | P-Value                  |
|----|---------------------------|----------------|---------------------------|--------------------------|
| k1 | 0.00514375                | 0.000753533    | 6.82618                   | 3.29671*10 <sup>-9</sup> |
| k2 | 5.86338*10 <sup>-13</sup> | 0.000930416    | 6.30188*10 <sup>-10</sup> | 1                        |
| k3 | 0.00146429                | 0.000577874    | 2.53393                   | 0.0136608                |
| k4 | 0.00145741                | 0.000441068    | 3.30427                   | 0.00154135               |
| k5 | 0.0118245                 | 0.001679       | 7.04255                   | 1.36076*10 <sup>-9</sup> |
| k6 | 5.86338*10 <sup>-13</sup> | 0.000283888    | 2.06539*10 <sup>-9</sup>  | 1                        |

```
Show[ListPlot[vn[[1]],PlotRange->Full,PlotLegends-
>{"blood","liver","gi"}],Plot[{fit2[1,t],fit2[2,t],fit2[3,t]},{t,0,1501},PlotRange->Full]
```

```
]
```

```
\!\(\*
```

```
GraphicsBox[{{}, {},
```

```
{RGBColor[0.368417, 0.506779, 0.709798], PointSize[0.016666666666666666`],
AbsoluteThickness[1.6], PointBox[CompressedData["
```

```
1:e]xTTMoPSmViYGCQAGIQDQEqDowZU/RsP6Y7QPh2Dn7755dm8HZA+Z4OFzd5
```

```
3uT91Q7hNwQ6dF6tklpdXwjlhzmkmOVmb1gbDeVHO7iGaV9U3BYI4TskODya
```

```
++FCfbs3hH8gySGbxVew8Y8rVD7V4ebBjX82v3SCyqc7vEtOqGhIdoDKZzm8
```

```
4ZzXcirUDiqf4zChuOhjbZI1VD7fwVjyAjNbpDmE/6DA4bbKZovsHWYQvkKR
```

```
Q8wvm9f7VxpD+AtKHKxKn262eW8I4SdUOLxTsPnttlQHqr7GodfsxtOlCtpQ
```

```
8+odfuwSKTBig/IvNDrsN22/FnBUE8IvaHdwaPhcP6sMKp8xweH+/Oolv/P0
```

```
IXy]qQ6CAv+4VecZOOzy5GHSPjHToVPG+229nKEDAGluc3U=
```

```
"]}],
```

{RGBColor[0.880722, 0.611041, 0.142051], PointSize[0.016666666666666666`], AbsoluteThickness[1.6], PointBox[CompressedData["

1:e]xTTMoPSmViYGCQAGIQDQEqDrFi0y8b33B2gPDtHOoa/n/feDsJyvds0SFiS  
6BTmlwDhNwQ6lClutNiumwHlhznsOdf257N6KZQf7ZBy70vF6YhKCN8hwaHl  
f/L1nk/VEP6BJAdrv7IbmqtrofKpDmvUVzK1WNdB5dMdWdlne1ufg/IdshxY  
BR7fmspWD5XPcYgUcn2rLATIO+Q7HLpew6jEGeU/KHCY2Bv44lkTVL9CkYOx  
0YIYFIEof0GJw/OSLaz2EVD7EyocEl45sUtEQ92nU00wnnGbRsVcqPsf1Dus  
0zjI9UOtAsK/00jQIitgVCVUDuEXtDs4Pzct60wugfAzJhYh78/XXK5AMKX  
mOpwgmNFgYtMjsMuTx4m7RMzHcSeHLrjuTTdAQcff3E1

"]}],

{RGBColor[0.560181, 0.691569, 0.194885], PointSize[0.016666666666666666`], AbsoluteThickness[1.6], PointBox[CompressedData["

1:e]xTTMoPSmViYGCQAGIQDQEqDv850/ndl2k7QPh2DIH1vTICGwOhfE8HzSCP  
8w7lwRB+Q6DDwU+GmXNTU6D8MAeLaQeT7u3PhfKjHUJEQn4mqxZC+A4Jdt5H  
GPR4bxdB+AeSH069mrLlILkEKp/qcFfdnTGJowwqn+5Qft9yX0a3HCqf5bDF  
6c3yXxUVUPkcB8WZmWGGfyqh8vkOURxau1eFV0P4Dwocpk+s8l9qWAvhKxQ5  
PLmQk1GiUQ/hLyhxYNxt3yy0tRHCT6hwu3JWGDe3wJvX+Nw0Y0z9OmVNqh5  
9Q5tXEcW1j7ugPAvNDqwnjGqaunrgvAL2h0Wa2g/POLUB+FnTHCQLL4uNElq  
IoQvMdWhpFH5vc15kxx2eflwaZ+Y6TB/bXNz7tuJDgA+4XFU

"]}], {}, {}, {}, {}, {}

{RGBColor[0.368417, 0.506779, 0.709798], AbsoluteThickness[1.6], Opacity[1.], LineBox[CompressedData["

1:e]wVV3c4F94XRkZGIERZISlEyChx7yEr2Xtn77333vPDx0qS7CgyssogyUpS  
GX2FooFCCEn69fvrPuc5957zvu99nnvfw23toWNHRkJCwnaAhOT/q8zGxA8v  
BhJMw57zKJYjB2YzPj345v8ek5laBE6vZkNEP4fPPf/veG88ZCX3STa8XLik

l+r/B5tdKW0QccqG7fXnCqH+h4BX60jDXDsRaHfpZX39OeDUzlu/kR5ZwG5i  
S/Kf+kkQ3lY+WqacBSzvpz8UZ3FBK7WsMQdXFvDLipVTOFPAH12qQoaxTFD/  
My349jgf0DntvJ+5lAk5YWKXPP2F4ESbOH/acQIUcb0vOGUtDI+mM+rDlzOg  
4n3C3rj6eaBwWs4PqsiA6aKV2aIsEfh8R2BFiDMDVvavlFI4i4GsyRU7N6ZO  
YOxa4X99XBKcNZ+YXGJLBROsIOXuLwvc8zMpR5MTQThBoEh0SxZW3UcCsrQS  
gezLYYqffgj2+x6K5bMkQo3F+7EQPwx10t+EL1QmwD663KLQDnDseOhG7HA8  
aFm80dFpk4fslMuGcJxIB2tTCn+Sx4q/wrUf9uLBd6K9rZjl65AG4mKeudQ  
LPz6Xsw11XoFiBf1eNudY6EkzG3leqsCzBy6Wbx1PwY2CymT3VqUwHc7Xahc  
JRpmuoNkNbeVwPqbxtwwRzT0L3xbE5FShn2+o1+NNqLg1rnXhpnypD855x3  
we0oUHp8+3RIswqohoy9qt6LhPz/LvYkPIQFHeMfAkGECLjM6rJT2qgBEpSP  
9D6jEOj96Ld2dVUDOiSk/RQOhIBaTeTXVQFNcL3Py306PxgsZHInL5dogpLG  
oWQn3WCQq70cdllRgpfXWKVmPYLA9lXKY1IpbZCiW2XK6QqAKonM1jd62sB+  
1e1pQUoAfL+R21TprQ2eaudOMhoFgL/1nXvqtdrwpN2PSmfdHxI2mgtvnNaB  
hf0zb/cE/aH62MdQUSZdaFoIVxdp9lWVoC+B5GK6UElqWv8hzhczHzndDU  
hbNqVWJbRr7wuGLbNSxFFywoF3QVSXzhhdQh8wEyPWAwiPC20/WBNeOLsly/  
90C/gS6pHRpvkCxK/0MYMQcdcsVvXL4eUF0yLj6ybABzSKXujogHcFUauNJS  
GwKvhTdd43d3oH3A+V/cFUM4f8tmJdrJHeZ6aluDWw3h092rhS00bpD8acTH  
tsQI/LlZbQPDXODvoljNnS4jCO2YbwmWdwHfldyPM9NG00FhTfhN5QLXty20  
jVmMgVmEqOWb7Qzi1KvCGqnGsE6bpnC60QlmzjEsSfmbQGJnUlInpSPoivpw  
+xFNYM5A/C37awfol5gwanhgAlFcfIN7tx2gEd1+fm7ZBF6zJbwkv+wAiVrn  
y7ktTYE8wr6O1d8exHw1LWIVzUD9fRRV0V9biH+UMT7DYQF49wHTZRNrWP0d  
EJlrawF9arUq8eetwUjGkkvD3ALKL8ZvilNYg0CHiHNHoQV000jQtNVbwcvo  
V39usl2HxmnhVHkGK6D7kJR1j84SClNzToi0XAcg3bdNZLcEce7Fcmu36+DH

7S1le84Stk9dPy7Hex1mrEym2dQsQYapw/o30QLqPwrwpaRYAjlpivelEHMw  
WBhqc6KxghMuEcJJdqaQTA6piqxWMCAMovf0jCl08TZZcAtYQfNXF1biVxM4  
a1d4YOqqFSi1zT5edDGB359c1VWSrCCXJ7hf08gYir8c+sB30BoWXPIKv9w3  
hKUlzYMLFDZQWrG09dlPD5Q2F5cfMNmAnvErDt+relDyJ+Zl2CkbCD/qvmjF  
oQemh1tzWeRsYN2W7JxZny4MS3CdvHZqA8TlUylN7LpQG7km17BuA6rrda3w  
ThtokpNPR5DawrGH0ecDG7XBnshLrXbYFsJ9r2weSNOGkxVGo5+EbOGcsuON  
Y3LaQBjqtjhzAvbL0TqDt3XAm/mzJDIWVuleROu5nRGE0ZOCi5XX7GFup1e  
9GheAwT4n8mz/rGFjd+9qLhYA+Yv/6JuYrWDdDGtbE52DdCzssr/om8HvTY8  
w4Mn1EHynuhDjWE70H5gSuu18DXYlRtbYW+zh6G0Vo1XLcqq5SRMfWbAHRZY  
7Br/RihDBSH5lOiUPTy+qqRRr6IMurPyRoq/7lEnoangxn9KcC+0scftkgPU  
Ft1pt6BSAouW7OzONgc4u/w86LGfAjTnrNX2DzgAe8B/szmKckBDqT4wNvUv  
PzngOXdMAVr0KPY//3KAQFopgWctV+Dwup8Dg7Qj5DuTF9STXIEn5wylLdsd  
wa5y0/pyhRwc12vUcx50hI27sdwNoXLgHsLg4fvOEca0/wQn68oB2+Dz0sRd  
R/hU8L7YjEwOfB0uHqqXdgLXn9oChrYAfCUn5kgfOYHY88wEbh8EySzTcaWP  
nIHclqVaW0EafqV/6bAecoZA93sUxVTS4Ei58ZP7P2fgCFu2CR66Bl0/qe2L  
d53B6deYyYjeJSB5LaV065ILkH/sEx9zuwh+6UTKvBYXEJMSqpJrlYQFitvl  
4LkLyOe5GjyJkQSdsGr/YxMuoGlZdvqxpISluPZ8Jm65QEhNwgjzogsXV3t  
I0i4QpKWyuw1bgmwpLiWkNzoCpExXcuvKi7ASKhB19WnruB1nSTBKegCyG5a  
bR987QoPGYp+OKldANb5QIeEdVcYfR119c6GGLztrlCOFXUDhntbV18piYFq  
KNnB8Do3GD4wIOnzVwQkNtoSvWrcQUc2067cQQiGdZdfcbe7g/xchjmcFQLr  
Jna2sX53SNl+cNpm8Ryk+0XcF/vsDt+IVD2Q2zn4uq0wtsHIAZstERb8IYJQ  
sPeSzT/XA2iUmek+1fKDiDmpHV+5ByhmK9+OC+CHvg6x2vFGD+jqIRbdAn7Y  
CM8BqVce4Odf++D8m7NQEXlfbI/CE+bd2CW7SM4CyQEfww7wBImg6YOP3Png

WiNt6DEVT+j87X/bHPFBrk1ZsZumJ3jZBMc6fngXO/bRQ4LT4iocv7SWHca  
jOMuhoaHeEJBgIIQ1TYvNFDtF+NmT9g5uKu/kHcK70iSlnoEvYDvw9plOg5u  
qB2Krm694AUX3C4LH/rJBVvJoc51l73AX9uizuUFF8RTey4VXvMCRXKFbdkI  
LqigNFwKcPEC5nCLAjxyEr6SnF4SqvECsSG7YZl0DhDp5qzmbfQC+kzyaP6r  
HBAYcdyZ7ZEXBLCRD7aQc8DBfdqlg0Ne4HPxvmRjGDvw/15fnF/ygpJ75kl7  
/mzg/LN78YaANzCpqhmxZ2Ahqb2uwQxb+ixtfX8cfUE7Po00SVIe800/RDd  
BP0JSFmvXPRV9Yahk2Z9uOA43FtNX9R09oYJ3eY9mxYW+L5otkhR7Q00382K  
PlAzg+fMzlcvf9oMpH0mKU6CmpZcalfRHxg9ZxxiMEMI5xVYgzWuugD/Vm/  
Lp99yAhz9wVpzyv7gOCGz9ikDSNohVkiFbP1gfDf2azGz46ACHuvl32xD1gW  
FjEL5R8GulGt9reVPkBbs6X30+cwfl15T6ZY5wNWD8dL6LQOQ/HyFvFUpw8s  
jlm/Ok19GA4/4m+e+88H8rPPu8/9of/3X2fsmrD4Ap2DrnnFGh0MH2K/Msjp  
C3uiv6ZC6+mgqqcq5RKfLyR3CJx6700HlvxP2I9L+Elwo1iR5DYtj05sorc6  
vpCQNzkkREkLD/JMYjTTfSGdl7ZWVIYaPN6eplOg8IPj3l3+Z0kpwUg0eT6N  
zg+uRQhcOTpGAZC20j5x1A+8pUVLrUsp4LBii5MLjx98lDabF1SmgAdNKs+z  
sB9c/UUXpkMkh3WiS/SHID8Q6X3wBmQPwLvVl8aCUX6QanQ9iJnpADy5Ji7q  
l+gHErbZvArLZEA88Gf2YJ4fbB6x8CwrIANxn3RZkSY/uJ2UTWL3hxT8dep3  
wlf84M1bp80aYyRgUXtstP+nHxx1fXNQu5YElGiCKxn/+MHDi7NUxckkwPJE  
3qCC1h96/95w5FEggVbRN40vzvqDRUFbvJrfX/zr8LY7u40/4La/o6rOf3Do  
S5lPbRP+IH3sgeTvll/YSprMqGTWH3SDv2peC/2FlcqfDyZ/8QdP8UJ6PrIf  
+EilzgPTbX8woTex8x/ewRV8jiF/mAPgzhn3cYvFbfwyjHhEziAAjD959eHL  
W7jqp1Esv0UAHOyfKq2k2sIFupzbR+wDQD5x2SThzU9sy393+qNfAGjt/t28  
6/ET77zprlZNCQA/xmxR85pNzHNuSbb/TQBIDb6xJEhtYKq8ugcPpgOg06qS  
dZtmA38j9Tt1Y+Gfj/x06/5sZh23TPw96LwZAI/ucXDkJKxjtZhjb2iZAqHM



2EH28/sf2P/dP+uvGwj7nDpqMYVreCAxL3f8VSDc9NVmeNXyDct/Xc2UmgoE  
qnrhZzeDvuHHyipp+XOBwBkxZ/T98jdcS/krxmQ1EFaGaLK4nizjrFgTrxm6  
INijCsqpfLOETSI51D4rB0Hvhd8OskcW8etZP2VlzSCg0b7ntfbuK1bDI/JV  
BkFg9Gxb8ET5V4z2wy852/3bT31/+Ln0V8wTOse3Eh0EJFaP/cNdvuClgFLS  
rY4geMxOGAn48AnbTPzeM3gWBJ9NZ94cafiEpyX1dlqGg0ApcCOOMeYTHvlJ  
vhr0XxDo80RnK/B9wg0+9tN/doLA/nwxi57XAg724G+hEA+G3UEDY/sT85jG  
oc71WHUw/DzRbTFZM4cj3zoeONYQDEOyLnotsXN46wpPAVN7MGzL9h9dN5/D  
H7lynh8dDIZRcybjgCNzuP1dMA/jUjClqigw6P2awc4aSpP0AiEwjz/KSdM3  
jece/3WnFwuBZLYxhajoaWwg2EZBLx0Co2fG93LxNJY/e07CIdUQKCF00+U/  
+g+zPjmSTuscAsXdxZ197e/woMT7KwerQ+ApzQnqmjeTGMpy31E1hEDsxb/0  
NgWTuJlRy4uqPQTiHQZlyiwncnqkyLKwRCQnO+KeLQygYPvVv0iXwqB2tGn  
Y+xHjrAAh28dqUAokHSL/S50e4tTyGnZft8NBSd9stblsDFMz1YIb+tDYUbl  
urWG7hgmiArZ17WFws8SLpOj/GM420Kz3mYgFJo/fH7Q/fYVLmwlKg9/DYX0  
rxx+hAuvck0ru++tM2GA6veOy5OMYpGY+zcCzodBVt6sQm/zS9xwA3VpS4WB  
Qq6jZa3bS9zSZ0ldqRwGmNWuJ/j9C07mKi92tw8DLyuWm409L/DYG6EXuDwM  
VARFk3YfDGG95c71E/fD4Fx/+yi/1xAeJ9U6vtkUBjKT5czfRIfwf8LeNIW9  
YRAwXJXD+3AQLyQ2/zq8EAZ3r986K/9kAG/JYL6PPOHgQMa+cGzOWYt14qI  
LQ6HxJGeipFHvVjkga/QRGU4yGR9CpHJ6MVKj/L/468LB5qTq5w0Nr3Y+9Wc  
1MuOcDiBea17aHvx4B/PtRP/hQMunl5LtHqKgw0yreqORcDUih3XW44nmGD1  
kIGM41+sR1r7casHV7hOdejxRsCXyTtMCqM9eCyam3VXLAIePaTM+RvTgwXq  
6scUtCKAg301WHG1G/9HNXbIXXIEMF0nZZ6r6sLrjFs/zmVFwEa7o9pL2y58  
kJ0100JGBCz0v1vQ4u7C4uLWe7xVEXBq5100ZWEEnTrVcb/J4FgEThPO2rPkd  
uMiMmkhGEgkXj1y9Mn33EdZ4yE+eLx0JNluinhuCrdhl/lsVAUXCvE7XcOFG

C7Z6WaueJB8Jd80TMgcetWDFxQt5waqRoNn2QqdKvQUXcCABc5NIyJz988ww  
oBl/jtPR4gmOBPINPbmYD014jfHYT9bwSGC1uxI18aAJ/7o9ceNodCRcsyWa  
3YpswnTtZvPkyZHA/DGhI4i7CYut2Pt/uREJKc+OMBo5NuJwg5DCe22RIP/G  
Xq6PugEnzsvKlXdEgmTosIH7bD3O9CT5fKsnEnjunYw63FyPy5LjzmcMRMIH  
Rx7CrE09HuzMeOI1FQmo3SZy7ekDzHym7Kvkr3/1ZbjHLwrU4brtYfGei1Hg  
9700ju5bNSb7O8nhLxMFPadK8vzrq7EB5SdKQYiCu2fFD1kGVOM9pj+T2cpR  
EPnfWtA98mqsKiYU5mgQBcZa12QPnb6LP7umPWPwjQLfye92TKGVWNR3Rm1v  
QBTUDI xv7KhU4rSQ8rygkChY/m04q8ZcicWTO5zmo6OA9eW1NdRQgaMqvx9q  
yYyCnx+PfRRZLcfsH9UNLOqigOSEK19waBn2XDTGRxujILvfXH1BswW/XbM7  
298cBYHvSTPrTpVh579hu6KdUVDdlyVrP1yKW9lriyheRIEVuvhKlqcU6xrS  
f7m3FAXW5sF88zN3cPLwSMDv09GQruikyB0G5uZptT+5Y8GJlnHPOqFliy8  
pPzpgHA0TNpZXb10swiPUfXo0ElGQ+fCL/UC2iLMeqVRiEMpGq6blqiLbxbi  
u21588g++p/fv1DnOV+Ag1X0WK84R0PHMQkK+rIcrDZxWFvZPRrCL+fug10B  
XttM6tT0jwa33w101os38EWR0BuW8dEw37NF7raTj/srLDWjK6Kh7IG6lJdl  
Hi6Q4liPr46GmJ6Cxr5fudi1d+pxcm00WNMTtgqf5uLDH3UEiM3R0MZlYPrC  
KBbcihSIPVFA0VijOtmYg7+TOR/9OxzNHha79M3/yViiqh1PuozMRDhc/C5  
Ps7EM/Os5bsCMUDpFFrlzJKjm5WunPomHAMm10jpp1cJ2J4u++RLyRgQPX/i  
x+gdAu7LkzieoxQDTz9ELi1RE3B8bSA1t30MXG8PGNF6k4YtjtxJYHSOgb3Q  
qw6KGWIY0neAgtw9Bm7V0JO+U03Dny+xkn3xiwG6F1UZ75+mYqVnj3bvxcVA  
xp2saL6OFew5vb98sTwGmIZkTsYMJeEZdMZZ4G7Mv/mcED+SkYSb72h+Zbsf  
A+pBFJ9L9ZKwvUPxwn5TDASej/v2ZTYR963Lve/tjQGuxxQ1TXsJOJ46bkRr  
IQYksqRqzDXiMZUUb3jqViQEi03oFCNwWeZwnyYz8RCfXdDjylXDFb9sSLR  
KxALVw6d0aTbjbpbNWptJ8Vi4ZGnbkdgeTRm5iroHYdYsLY7a+pEGY35qPkn

FSxioc1wT/3vRCRW+VxQsG4VC4F3ya7caozEzk/pzIvtYiGRIDWSIBGJa8PW  
Pvx2jYVB8cM8aiqRWHK9ZbkhJBZ4P9pK9QdHYMX/lP5y3YgF59MvPaucw7B9  
a2vPSGEsjJZ/+X5SMAwn5giEhnbHgjiZvzvXt1A8rElPPVkJZC3mxQr4tHqFY  
r/ctY0ZzLBSHFcVwhoVg2/u2fH9ex4IqDVFrsS4Ix0REq0/Rx8HyfGSGrLs/  
5l0oMx9njAMVw9qQ9kv+uFfludtr5jgoyLWwbqDwx+SMdOkvOOMgnfXAK/rb  
fji+LGekRzg0/isJYzCb8MXJA1Wa1Rpx4MqgsG5g7oMFhIeuV+rEQaDoTRMy  
ER88lPXdo8wgDowYWdNYDvhgOjMxQpFFHEjLuD8OqfbG6SuPRrPc4+C9j94N  
xn0vnHn0pXZlehyCDgw39TiicUCf1gFZsVBnKDKUhbBE49NH/X2y40DA7e4  
W8N0npixwijLoyg09i4GRmlyeOLsix/HbGrjYCGdH/887IHzzX/qqo3EAUq+  
+cTlvSu+XclmwEEfD+qOm4uWy444OT6hevXIPPCItz9baHLEvnYb+xnH4qG7  
baJ1NtwRq5waqiTjiAefd9Z0UkyOeL0o+NcXwXhIH2oJ0VJwwAq5U4UNV+Oh  
T0bzqGGbHRb2U/zhoh4PDdNsfyeT7PAJvXrF09rx4DRhc/uJiR1e0ZK0kmcU  
D1rEKN6BP7Y4L+0ihDnEw5Mei4PJKrZ4KTZvXjkuHjYvXS0QXLPGb2wOXCRN  
iv83L/s1Pe2zxl3yHqntqfEwG7iZ3HzLGmeTKEsIZccDab20/l01aywbuhXP  
WBoPSscd2u/XWmGCj77A++5/+QszRbHRlljC+qiX9148FP0XwUA9YIb5ji3T  
nSBjgJrqqX39FDPM3P+kqutAAtyefu99RsMMbwl5z9HRJkDhqLm27ltT3Ppr  
VLPyRAKMvYh/WrtogmUy04WnJRPgbG/p9wB+Y3xOwX4wWjoBiqM/fYrfMMIc  
27L2/CgBdr6OeVN3GuF9s++3/BUTYOTko3t2eka4+6zaoSN6CUBmQKNpFW+I  
Fbqpvyl6JUD5p29dBfv6WNznQ8I33wQQTOSJ9H+pj0/ztZ0iBibA8E0h85Zi  
fUyZ6mg6F5EAs4kjL20V9HG/4fPB4PQEYn59qqhP0MPXVmPv1tUkQHqTbtzb  
S7pYh5PE4cTnBfgVbC+9NqKFe4wStRiWEiC2STj+cqUWFiEelqZYSQD5U6EH  
4y01MP1B7kM/fiZA3z8DcUZcCw/+kGvsp0iE0Ft5SgexJpZ7FvM34HQizGzk  
N9LSqeMHf2kX3fgT4bKXQVVcvxrmlM4esxFKhC3XzfXCODW8V1tWrimRCC+8

JoZvkarh1vx184oJsJwo6VjN8k1LOJKIT9umwhyCy05KqxX8e2KjKhx0QY  
ZBRn+D6rguk/sLg8cU2EVNcbG8crVPA3/bOo1jcRjgUIBJOJq+AqfHUhLjYR  
koU+TezpK2OuoykiEmWJ0NupkphZr4gZ2ukHiPOJUOHXGe/QJY/73ee2FL8k  
QpZGvlhrrjyOPNXAu7OUCkdIBVWt3OXxeqp+pNl6lvzll+3ccrj8euFUqdJ  
k6Cy5Ci7Z4wcLqQQqGjmTIL4vaOMmmaA9dt/v3bkSYI7f12TX14ETO/xgpSN  
LwlUCs5MFB4DHDnpaR4hlaQlRmbHJIsxtqlpYVKRSYJVXFt0NhNhAW3FmCnj  
JNj8c7rkZ5oMnqdgqU8xTwKh/S+z+5oyuLD964ysVRL49vxeTGeUwfS8qdll  
jv/qndqfRDcu4x9bYz+cA5Jg1PChaec9adxaaGm5l50ExkmnO2WXL2KlryGy  
J0eTwPxl/MvlTgkczrvfyvUmCYRFXbOHUyTwQ8tlcZ7JJNj9oTN52lgC807F  
Cp6eS4ID4UQz2Z/imHQw7YTgWhJ8xYtjc2Li+HHN7Z+Sh5OBcSFkYv+JGN78  
wu11kSkZVjmCtT7mimFB3rjvl44nw/H330yEXMRwQWHVvAxXMqyPVJRSMYnh  
gLTV/liyVDz6J63rJsoFvN4el9DKxlK0sm6Js6LYOcaRX4tvWTYHZZHiHqIW  
wXe+PC/TNkqGduVgDpH+8/iw5fBNPctk+PzenMn/wnn8XettkolnMoQlz6ye  
YBTGVWJf7OwJyfb6SqPCbEUQc2zRclapJoMBuQf16RNnsQnlrznXN8lggoyv  
J3w4g/OZv5SaTiZDS/fjZqfqM5hR6in/pblkWAvPub4rewYfDAYr2FxnHm3z  
quqfTnx489eymjNDCiTSE5c/TPJiMZp3DMZHU6CLTaXqaRUv9mDth1NmSQHz  
kLZupiBevCRdZnT6ZApMVQbtk7Dx4rkQM9s54RRo+kET9cnmFB7+MxxioJEC  
fZyxJn808mAa+kdiUScF9A50xJrNcmNlzruk4gYpcPbrdQRbMzd+gulSjlik  
AFUhsfehLTdujZAlDrulQLvBzZuKfVy4jLS2Wj4tBepEREiUxE/iElqMKeHh  
FNjJVkDo2GffZIS+uamXKUC/LUxR0MuKk1n3v8S+ToGtQ4/kNpNZcf55t613  
71LgI099MPsJVtxsf01owmIKbNz5KMp1+QT+cZ9KfZYyFVq7++eZc1hw4EWS  
l0yTCiLDW5Na1iyY5Km/qQR9Kvw3clds5zwLpp/85JRyLBXsUvI4UoaZ8Tmy  
3ngp3lRgfc6tlKGGTsYRHZnyKWClOVUydwNjrwy1/JcWjEVDhzoklxyY8L+

Lqsjn1RSYcljwDpKjgnHRlq8v6yVCh4X1ZNvLR3FJdUyu18sUmGu19xZR04o  
fr+/cwFCU+EMOVkX698jWlFsq3KtORV8L15Rv+vFgl3ajPeW2lPh9rOyGfmz  
DNhiSE77U2cq8AvcpkqYpcfOq0d+T/WlwqPOX6XUWvQ4WqpB4+l4Kqz8ir39  
6ulhXP98/WfOVioYTi25XDpLi5un3qkSdlNBbYd2fuIrDX68/OR28n4qyB24  
QEJbTYP7GYhXIyjTIIlH+AG/MA2eM7xwy5E5DUqcWSJ5ZKkxw1cfhcuSadAh  
d//uiC8VZto1vSEhnQa+Mte/MyIqzEqnsHIepcELqdhPb6moMJ8IUz6vUhoM  
yKrC60JKjAKblg8ZpAHz99PsoYpsNvBn1lzfmkQFIkrCxPjofO+n+Ie5gG  
S5cV9jMiSDHrw8pgmbY0CI5hP+NtTIqd5aaObjxOg9yFKqbKC6SYxkRGybI3  
Dci1XpBSLpJg1RSyGunXaSCzUfkyypAE939P911dSwM6Hoa8t3H76Hhw96GK  
zTRYtz+7rXFHlzlSrleY7aTBI5fqRcak+4jqpp7UwN+0f/5l+iRnxB+kpMWG  
yujToV+AlvhK1B7qbaikMj6XDuEPn1LuFe0IjxVzCCSDg+trg7v2+4i2yEa  
6b4L6VDA9VIjUnAXHVhwc71wOR1Ymky/7rb9QvLHxF8dUk2HP/7Tv+9P76Ce  
g06CJw7pEPtbSpX24jbqlJkSOleaDq4Vcc6ysImYbvnTj1akw8xUwZF9pk3k  
/Ofokq910uwr5eWxLW0g5k6NB4/q08H5ZRCLc84Gcs09Yte60+FbsfYAWlth  
7PJ1Us7v02Eq7t5B5uYfyLtE7Tj9h3QQ9FcfVyT8QP1kSzv1C+nQVFY++8z5  
B/J9ytv+azkdUjvqQhu5fqAhhQKZpN100BkaVRUnrKfg5Ti5KpYMeOsb7l61  
u4JGK3l41NgyQPSVwUpE6wri09hNtsaZARMWWZqf/FfQWP/uUym+DHhx7AW/  
/s/viF/VU+m5eAZsnk2wv7vzDU2qmV77rj0Bx/07VE8fX0ZSOqL6vKkZwBJq  
TRbZ8AXRSUfEsBAyQLWSLehWyBc0x/2iniY7AwpjZVcvKX5BiT8c6X/czIDn  
6mo9y10f0TtC8f00mgxQW0jVZqb+jMjfmkgbDmXAuI/W4J2wBaTTYu6o+jID  
0qYyTcQ1FtCZ2zW5sq8zIHESllHi5AladVfeOPVfBgz4r5dFPJlH3PQR99aW  
MiBOh1+CmX4eWfMFMChSEICsimji0PoBqbEWVSAqAtCY3fzqmPEBSdl/k71I  
TYDiWGJDv/0HRLvF6Cp4iAD1gp8/FDF/QE3PavuPHCPAw/SOh0nBc4jC7nPU

DC8BhpqvPbMtn0FVpfqbAQoE+Fwi354e8Q616N25r6IEAG/G3hQNpXeoJ+K7  
/RkVAihNH7ZMOfQOLTjETo1fI0Cat/9MwK0pxH2usVNClwDn9AxH959MooKm  
w0kbVgSIkrsVMHVqAt21M5MfsiGAYQCn9/KPcdTKXPW7xI4Ah99ICzI2j6OJ  
QOyu40SA/Fs9RrcsxhGTrLtuVScBRO+JO3y8/RalPRvi8IggACsdpY+kxBtU  
6M8yoRRFAJ8Mx7kc6jfo3hkbAmcMATjGkj0Zl6jwaRdspF4AsT/vha8mPga  
UWrwfz2XTgCRN10X7D6Oocjx+IalQgJIhpG82i9/hby/yCnbtXmgvHYyzOLt  
CIJpu0q7xwRwLjNkdU0bQQyvkqjsOglQwMmkzaU0gu61v3pu84QAd8QGAWPa  
XqBPavYqVoMEuDU5yN1ROYyMxKOumr0jwElWzutJdwYRH3/5XdNpAtgH7190  
tBlEPzkGqE1nCEBSJWw6dXoQZVEdGTT+SICVP2S2bvcG0PC7YIXDJQL8JbLt  
X0zuRziq+5r07j9+DnR1cqTPEb3/Qo32HgHKn3hX3hvqQ9POB+m09wmgIX45  
Nye3DwXqaQ1rkmWC/nd/+WmhPtRwZk5NnSYTwhMjU49bP0N8I3/VVVgzYYex  
IPnY3FNEx4a1kHQmkGcaJE0J9iCSFwljbdKZ4HnT0iCOsgdthI/q/ZLNhCON  
wQExH7rRu49Wxk1ymcC3I7/rk9+NKqtjrQWuZkLu9dk5RppuJC896MtslAnv  
bitrWWx3IMlvjNsbxplQiQd8zJo7EH+RadAr00ww6wo8s+jXgQ6TfQ9Lvf6v  
/pBW162tx+j9AEMCmUMm1Orfu629/wgFGuvfWPHLBJVjuMbl145caYvYhgMy  
QUHLbMPwexu63vH51t2gTNCq71egetiGLgDS2zD/vWnyvF/q9iGji4W1LyL  
zQT/36Rsx91aUW3gXEcf8Z8et8wy/F81o/k8l49F9ZlwZSLT4cZyI3p3wfmG  
T2Mm8MoKqHr2NKLRI47Cyg8zwef37YeleY3oMZV98GprJlw0a/7GrtIcGms  
GaE7E/rQa1mZsgakaqgv/2EkE8poHL0ZvesRbOg6PhzNBL115TlJ9XoklaGT  
njSWCcXUMhN3z9Yj3uea70THM8ErN08oa04B+iOp6h39PhMYxm4er9V9gB4w  
45JT3zJhWupe3nJGLapok03f/p4JNbGDtVGateiWhszK0GomCNx9LlfKUIuS  
4y9J+25kwgzLsF9s5n1ku3VhrHc3E4xm9jSKb95DLONnyeyps+BF+U6acn81  
Cs9htK7iy4Jjb00mhJBKJO63Kfx2Ngvyl4ztpZUq0ZJe9+/bAlkwZ3B5yf5I

JdJncs/JE/53/tPEwbN3K9A54kB/vGQWMA1wC4jNIKmpQuR5O6UsWKJWkS8x  
L0PpnoZ7lipZUCNkOhFxxvgwpaAkPmKlmgXcVlPaTlqEHDNPWehpZsBfSZZlf  
WYri06VyrxhkwyMEyd8sOyVIPHVlj9s+C3qzjTde19xBSy7PBjgcsyArrZF1  
L+YOun2tMPeEcxbwwuuwKLM7ilZWVeSlxYsVxcHFtPfQR+Sym1I/LPgSQzH  
AHNAMUpPMBucicuCfRrRN8IPitBi9GDezflsEDjQ+0GiqgD1nuyL96vMAh6e  
w2JhngWo6HGPN+bdLLjc/MRE9lIB0ttq1T1wPwvS3/gP8Q7fQJ1OlQwuTf/w  
H5pWCNzOR0St2ATpp1mwmVLq5m2Th9y/R/gzPcsCneas/+bE8pBKcojdSl8W  
UDYaBLEt5aH9p95XSgazQLo9cK6mNBc5Sln9pR7Lgp1Tn508lnKQLCcKmJr7  
p2eoh3J7cjY6/uiSfePHLLivZ8LmZ5mN1g0l9NMW/vVH2jhZMhtVZZ67IPc1  
Cwp8i7Q754mlkYJttWo1CwRDCNqy8kT0ZXnbPnA/C6KrStWZGLJQZlu9AQs7  
EWKvHDc53Z+BBArivh3nJALb01tx/egM1BtsHM3KRQTPgaRjgrIZaOcyas0H  
LxGshar3nzSli8tOLQrec0T4ZGvzLagmDZ1/utoolkMELftqydaHKai/90IV  
MUSEc0uE0tygFGQdmzd7AYhgVh9neQCloFxFtCulQATuB1QlUf3JaP95urWs  
GhHqxUYXCueT0lthoS0qZkQYPFmxzy+aiOzvK1ZesyACjS0555+9BESS/lZG  
3ZlIts9M2pQHEpC4Zpijli0RxtXtFmRtElDhq+EuA1cieASeZSgsjEcu4y7u  
NqFEaFbl1A7hjUPUc3eHQguJEJEdqVcSE40qqi9Q+BUR4UGabVm+eTSS//dG  
uRUTwXI97MOSVDQKpXIVb15GBNVbJ82Kv0ehNfGdPHSPCP1ve+cum0ehySQL  
W5LHRGh9MJB9Qy0S+emN3trp+Mef4bLlb8FlxHjSZGKtiwgtBux792kjkVqT  
m+qHp0TYjNx9RJEfgbpmskWeDBHhG8mb0ynF4ajiwvvezH9EKGBMT6MbCkVX  
9l0lQ98TgVZbVeVuVii69/y8J0lgo5003mfSShitaCZt50nwqH4TsHQbyEo  
PVF0QHGGZCOsaN189PRaC/N5H5FD9JsJ5ulZ/ioggpJDALpzCmg0kVke2gyr8  
ESXDUJIVezakd/6YVI7wR/25QZ+kOLOhM41x2c3IH6IVjBcucGdD/RbTUhet  
P9J9RqBF/NlwT+CEsaO/H7I+QLG4JpUNcpMkghdMfRFvSqPC80vZwMM6+Vjs

ki/6zGhdfOtyNhiUfa+IYPPFzjxdhqo4G+yoXr/Yf+ODvOSC+kqVsuEDjnGN  
0PVBkRHfSw30s4GMgWY9y9wbyVMV/j1nmA3BwMzzA3sj8gxV0wPG2cB42Ayn  
8nijxKJKxgdm2TB3Y/FWwFcvlNFhFUVtmw0tA9e9WAK8UNHvtxaPvf/hP6NX  
dvK2J3oc0HmCh5AN+dneRV+E3ZHsFUV2rqxsOCMnk+v7xw110g9zcmZng/O4  
xmevYTFUXT51ijU/G/52qVu1ubihZ683hRiLs2GtvibSos4VjZwXlCd7kA2x  
fPV6LKouSPN3vQJJQzY8X192PXfSBY32XVTeb8yG5Ecup+9sOqMxycyW13ZZs  
iFC+dLW82BlNpFgZrHdlw2MXCtbf05o7kue88eX2RDlvNS+/swRWTvyus29  
ygb7208UcWO6GN4ucfM62yYXQniNqlxRAvHGn3fTWQDU9xA45KoI1q8Mhl+  
NpsNqQnFF8JKHND6bXlik9VsYBXeVeb0tEfkRl6PShhyIOppp5xYiS2qnmOf  
Cz+SA52CbFctEmyRllM/uenRHHghUpnzxNUWFQaf1DjKkgOMf5R2xC7aIvFb  
L+ZiOHOAlzG8reaVDbl7yE9pJ5QDd16kvXtKb4PoXN4KyJ3PgfXrFyL1t61R  
w0akJodoDqyF/NBhm7NG++ST+W/FcyCsuj5IvsEa5Z6JF1SSyYHn+qwl20bW  
qM/1o9aZazlgG6t1qLfOCrn+TPM7oJ4DvRfevgy6aYUYwy8VzGrkQOZr08rr  
CVbIloMwn6eTA2eQU0b7dSu0XY/8D5rkgMTrE9H+jFbo7HbBzUXHHDAj/Fcq  
HGGJkqj0P9fE58DRnb8fSr5aILHNptrwxBwYYkMRMoMWaNqeOUA7OQdmPisx  
HL9ngYTVpqi203KAni+pguhpgcaYr/PL5+RARUAcNXHPHLHfc3adLP2npxXZ  
dTuc/SMc1i8pjwHCpavP9ukMEfumUJ/wir/6ftl8Eb3shnq9l9LO1WTAyNf  
bwjStZohOzn/OveGHMhfG1V10jVDteNR6+Q90TAqqCqxkm2KDK/Ot088yQG5  
vo3jbOGmiOSxQkx1bw6Y3/r+KdzBFOncoWLS6s+BS00l7xalTdG2S5rEzZc5  
wOLwPP7KggkC0huBojM58KyscbQZTNCY4IN98985oJXx2PIJhzGS/rjoZvQn  
B/pVx3+W0xqj0vxT73X+5gCJn63oo19GyJci75HygVyliT8REjhuhI7NhgWK  
0uaCYUO8z/ksI2SUdW2dnC0Xzo65vWBhNELdKnFWf9lz4XTts/W3ZEal/2/n  
6C/OXEh5FHG5Y8MQ7bqI1a3w5ILZf/rMFOOG6KbiCddJgVy4dUWAzqXQEM3s



fP5UI50Lmaa+L46LGCKlOi79CplciIz+rM1/yhDV2Zn0FqNciLpV5W/CbIgi  
x16U5MjnQgiXUST7HwPEfa/peoRqLky7k9cdHjZAttejp3RMcsFkLEtD3sMA  
LT/jePErKBfU36egI8/1UeClUIluxkFwoqpZvHu/QR5T3361Wh+UCJf3jobtN  
+ogrO4/RLCoXXh8yPBZQoo8MrI8YdSb+w3f+1cGSch3UvU8+H52XC9WJW42T  
F/WRhreNr+mNXPjl/ue8tog++u9TD4X4zVzoOsHn/PmMPtoaDj/7qSgXyB9H  
9diy6CPBmztuyhW5IHx+U37xth7Klfq2Q/swF/rv+45kPtZDvDWqyQvNuTDT  
/30146Eeque8y9bRmgtb5ezed2r10DCFPXJ//E+PcpDbK9ZDpG9mY0af5sLz  
h7yVkfF6yNXzNX3OWC4U7/j6yenplbm77byca//uY3NTJnlLF7XeprontJ4L  
VaHty2fWdJfIrt4F2c1/epQF6fYt6iLOmBU5s51cUH5xho7svS7aNeO5XkCS  
B+7axw0snuqihsPJN5iP5EFf2drSRrou4qea4OI7+i824/e7nKiLiv+cqpI4  
lgfnbjU+0fpovSljma9E3lwPV9qv9dHF7n0/nidxZ0HIpG77NWGuog30Jie  
QSwPDPwaDs2x6aKb7hU5nOJ5QFvBTk7KpIsY7TbYhSXzoAXnlx+k00UkOmmC  
6tj5cKySsqr/tw56L9ijkiKfB9PHcmY2p3RQ7uzZGCrdPHDc4KxXJuigQ+N+  
NCz6eVD+KbDMK14HxQ4/yeQzzAP702uX/UJ1kHebWbGiaR50tvD3YUcdpEEk  
dMTY5MH6Z5XfhVgHPUt6r0C0+8f/9+JJHwkdJBMpMFzikAfNxupWaoI6SMCt  
912PSx5ENopaMbDooDs2R6xfueXBCj1n4x6dDjpuYrE455EHJL6lKptkOoig  
Ve055pUHFVkBBy9s72ohKeWf7r08efGDVsQNe1Ub/A8GOCD=

"}],

{RGBColor[0.880722, 0.611041, 0.142051], AbsoluteThickness[1.6], Opacity[1.],  
LineBox[CompressedData["

1:eJwV13dUFGfbBnAkItKNYui9hK4S6SAXTVDPu3SEZQtd6X1hhybNKliwYkEC

ERAI FjoqaqJYAwoBC01QERQJERWBF/nm+2POnN8585wzZ57rvu95lOhR7ixe

Hh6eBfL6/7v54rP/YsR4LHlsu8M+iBpbThx/e3kucczSwMFZYXhpOzj35eKa

Ej9abm2i/rJhXA39b0yoRxPXLDeJ3Hsu2miApU/3bNmJhA/0vplo70dhFZE  
LeIT5bC5wVCyMZcKWV8mz4iTAKQKzIrWWj0gMTY6WXVCEc/z/RVzJj2haaF/  
gT9cGaoG33rs9H3gtDaqPSSpDgmDw/w2LQdRlq5vEp2oi7/TSjNkZBmo1B07  
rULXw8WKZpm7lQzUjuX9b9hpB6Je+6UZKjIxWjk/UXliXyVGTJpCizMf7ep  
4QvXh4+Udu2QWai23pzXHJQ0REZR1pGN3eHwtbQ10pxogblVTMdUR0MvT6ty  
11cLWHfwezYMR4O3fwwfl4Q9CNMt2+clGIPGgLGBtARLKAhdfbktOgbf95h1  
2HYDMwMtaWYGsXAN+Mfdvcsa9eahfd51cTDNst+0e9kaah/rYw4PxkG1trtr  
u4kN4u/seCu0Hoflj1WKLzptsP4+dWCKGo/q9EPzgZ220Jhh9SqsxuPz2U2F  
hZr2QiGN//QN/USM30qxcFnaix8nx6488UrE/TdzCzuN7DFg1e7GZifinM6g  
1+d2e+TFLA5V3UnE3uVn1dLaHTC+r7vO2DUJp0aMb+e37YdFzB33aI9kZK03  
xod/2Y+5YV7rIphkRKooaDgaHMATW4evGqXjsIrgOy7WdgBxr54scfqT8X7l  
qX95qyNqLhowVWxTYCYd8a2mxRnB7Im4/+RScWcqYWHfv87QrvA5vdUwFY6N  
xMy/Wi5QEKvuXnBKRYB5+XOzahf8VKrrPM1OhdUl2miYgysMolYU7j1LBfNp  
0fUNRm7Y6tCx+UVmGuoNSjr/obrhplagtUh5Gj5WlLfwxbqhy+KTDx9DGhLp  
vzU5NbshJ6ms2vlpGvIW289WqLmjwn1mj7EcGw3bp9i7xckQ+no9Z6qBjfmU  
d8kb9SnoNZvZ+8c1Nn4Zn4t/5kLByz6FCLvHbFyvXYpML6JgIBsFE3Ns/G0k  
cvABLxXFnYqzvdrpWPaxtgj6j4pNlxQrb1WIY3ePhcluMQ/cGMkWO9mcjhRl  
GwN+XQ/UpMkeN7ueDt4PTrp/hHpAkCaus/lZOraxGXLLEx5ovq/1Q7VgBgwr  
j60V93miPcfdUzM8A43Vn3b3ffCE12FZwV0JGVCs84wUEvCCxO2JH8WJDAhd  
lh/JtfHC9sbj3ofKMvDqdnNnaqcXHBWXV+N7MlD4ti+OWe0NK2GzYGLBDtZn  
9Rt/u+mN+P3SkytbOYifL58aH/XGzsjRkGsyHAQuBbj5SPiAr1r57pgOB7sF  
/tVzPuqDhsX7lpecOBjXEXtvIogLI9XaqRsFHFB2xSkillPrC6pjh9Z5iDu4b  
PPO+etkX7MH+v2q4HLTsOX9P54Mv2jTuBMpc4CDfdccFJZof4g3cu+71cLBG

LR0NSPfdE/ucyYU7HMT6LG07e9oPQnFDUjyPODhIv5n105Afsvaj4ukwB/rx  
LjSh/f6oINRn9n7koC65hesQ4o/el5a1tZ84kE2X6M/N8ceG68675pc44D8y  
YcFz0x8Rav690hsljHKjZL78chCu9kbtQ4IEjIw7PjwuFwB1IXXWTlkC/64m  
pZVbBCB42TPZQ56AtzlN0flgAGi3z+gdViSgdWNN+I2zARhvj/qqkqgv+fp  
2hmZQEQRX8zk0yFgvN5VTTELx+F+JOT880iVQbVltL+QXiKJFQancHQTib8WW  
pJ4OhNcKT+gzfQLCkwUnmoRpoBzXjV8yJoAN35n5sjTs65iOYZoSSFCKNLq  
0CCioT3Ua0ZgPMh3VMaRhppae4PIPQS2ZfU1L/nR0Ft2KviSJQGHauvMwQga  
fluDg2dA4MqUlnpREQ3J4RGm5jYEpnPfwS+Q8Nqq4SNly0BaZvtj6wbyfV4  
mBlqRyCHsRq18pCGBbNXq4fsCXi+edQVJhiEiDMBvwwHCBRuxFE76SAoPO4o  
GiZ9U7U1QEkrCjnvG+r00hLQYJ394cW+IDLn3GURZwIHc7cMt/oEIWV/s38X  
6RMXcuqLw4LgeoK70d+FwOrbSCeHgiD0Dcmk57kS2LlpUkG1grTzYOoWNwJM  
dY9P6/VBmDGwlyghXbH3wZ2RTnK9ZEWwgDuBvmALbsf9IFyz1GKnkObNuxJW  
+jwIliEBEZOkjerUzKNmgqC1r8Leikg8l6F6IFvQfhatUe1gnTVO5FJ9c10  
UDWvis+S/oc/q4VXkg7Nc146u6gEBDS+5o7/TIdXx4mMGNJ7HMK9u43ouKt/  
T76BdGzouFa5Pbn+obfiC0m6fPe1GC86Zo0byzd6kHmr7+13CqEjzES5TJ30  
lgem1ZpJdLQfUdphRdputjmeL4+OthHhZCrpVAEV+8lyOvYv2mfTSDdrcqVu  
1NJhx9Znski/3ic0d6qdjqy+rboM0pLhnJ74XjrMtOrmfUg7Fi4Wuw7TsUX0  
dNc+0pkNIQydaTqqvpVV6pNufzhisPkrHUdD7ZrFSb9/77L5DR8DsaPuy/+S  
77/38+yHy+IM9FOUG++Rr17L7k9XYcBicLa0gvT3Tflt+/UZqAg1uM0i7bel  
s1zCioFbSiXQId0p5Z76xoWBo8IFCh/J7ymuMnfwSgADLwwwRtSTfmygqHaA  
zUBY5olMUdlalt2bJYsYYNyIC+4i9yvHgTr3poIBl+g/5gNIW/jlt2R0MBBy  
fET+NLn/p5nK3A09DCgH1U7sIP310PVUySEGVkufjNwi89NMLFhd/UQ+XzDk  
OkDmS7CwUI2zgQkv0+UmCungUlUBxy1MfloWFXIC5lGh1vvJW10mPHPP83c7

ESh+dCtAKowJ5WlfHSqZ77l/fK2nk5i4HCgw37yfrK/xz2otR5jYW/T3Fj7S  
G/7T+Oj4OxNdopr1NQ5kHn4qSSMmmIh+7uDdSNZTn4J2oNM8EyU/uvlNkfWm  
pXnXWnqNiSdPNbZvJ/3abFmgVZqF4rgDQ4esCVCDgk6982DBRCz9/Eeyvg2b  
drU5P2YhJ3arzA4jsn7aHp2SGWFB4UmlkbohgfkeFntmlgVj8NZJGZD5e1ph  
k8UfDOuxS1VfyP4iubRhoM06GkzLrgtZegRWrAbmZbuCYTK5lrtC9i/XMD2B  
nx8Eo+19x/x5FQK1xYUqu14EY/XCuVorZQKUCWtvu+VgKF7L0kxVINDEbrl9  
yCQE/opPs25JEQjoOHmypysEyiOR1xtECPyp42VK6w7FT8aDu00mOZCktlDD  
H4aigFgbmpni4HCaWFT8y1Dk114Ea4IDmYf3avJXQvHh5spF5+fkPAoxFrli  
GobNI2zXtw84UK+WerXhWhiKHKaF9Zo4KJQYza25Fo64bVZNBc4WD727gb9  
UTiK++QPIIRxELpp8YvSSDgaPR9FlbE4sPsiEFy1Eo6zIgsxpQc54Bk02nv0  
JAKMmp6QEHKeJRwr3cTtiECphcvRJHLe0fg05BW2RGI7ZffvKTMZMFjsyo9p  
PAz1K7zad30ywBlueH9bOwba/ZY3RpCO6PFvMzGacYg16HLetpmNqCE1YVu+  
BBSEJcTT36aC3W/+tutZlgzTK5rM+1LwIj9bPvw0GVdd9OW01SdDMORS5PYG  
8j9JvU6LVpWEoo1CMqsX2Thz4WKA46+JkL7gysmpysCU6i/MnsIEOLdpbjxF  
zoX7RvUaHTXxuLT0ePdt40woJA/EjLTEofBxX9KqWhaiuenyLWOx4Mv8pC7w  
czamc+MqB9djwG8kdCVUJQdrjq9tj3bEIJuT5fRCNBevftdSck+Mxvk6GU85  
0SMIo7muzkVEwYC+LSb2f0ewWL92rkz8MNzleUKkpvPwmL8j0GAgEmLdog9K  
X+fjir94Z0d2BPbOpFkoPClA6odWcRufcMh9FZTPeFIIN+ENDSKqYUjj0/5C  
73EROJym/9nzhoJSF1030H4UGluOEL3rwXikkTiZ2/Yr7trr7mxfZKHH/IWu  
Ts0x8Dn73yE2smDkvstD9ehxrJqu671RYaK+xuNzkm0xQmyOsf80JfvYOyv7  
405ifA38nvNnOB3CMpaue0xLkF3spLSrNAivuRFTIVdKMMSKGe8boCGjbCu9  
Xv0EKmTe8u+Qp2E26yH3ziUT6JS5xvztbgBKuq54SsiWYvFc7xySDkLg1cVH  
7L0lmFn7a+qdrD9s82T1iqRPIsfyZ6b3c19cT+qRUi4+CVkxz/8etvtgo3fM

tWqxMji8HCuuKPRGQSZlufFIGeyUXra1ZXhhQPvy94OrZXAT335YN9sTH+7K  
/b2cUg7Lkt2OmhkesLrYrSq/UA43mvCYXRkVnef5m3Q/lSP5QdIfjiVU7Cyn  
/mLxuRxW1H3W1F+pkM+et/L/Vo7xPXmdLPK8teKvHHiah4vPyfsGSxKouLql  
s0KnH7ko3XSrStSTCtVkh1ExfS6K00xOVEhQceZwbZn8bi7Sq9cvdG6jYitr  
UVbPkIvZHVEpz8Wo4HH/VdvJlAvf6pYA6c1UjGnfdiiy5iLwa5N83TcKyci0  
svkpXPBMmlDevKBAZDhBUMKDC0mJZy5iwxTkPP6zRN2LC7nLNwXMBiiI7fKv  
svPjoj9nufXkQwqcS4tvZD048LIJe+t6jYK7BW02pSwueY68fz+zwgJzQutx  
dQgX78/TQ1taKNA6dOfI7Qgunpe0jkg2UfAb40f600NcW05Xu+RYT4Gkb8Ds  
qyguiIfyk/k7BcWujdELMVzccXid315FAB/9t6X1OC7MV2eOzZ2l4P8ATbi2  
Wg==

"}}},

{RGBColor[0.560181, 0.691569, 0.194885], AbsoluteThickness[1.6], Opacity[1.],  
LineBox[CompressedData["

1:e]wVzXk81AkDx/Gxm1URKytyrStFCIkOzJcmsY8rwsqxXoTcRo405D5mHD9h  
fqRFY4V165WQ1drs]knll8qVpJA7xhI98/zxfX1e77++cm6B1h7fUCgUb+7+  
X72VV0t0IQqV4ldpNEIqUMcy3td+ChuhTmmEB4nN8uBGh/TlyrA56pDDpchv  
R4TxYvLE+dSwLapDLpVl1SYHzvITWkTYHjQLy7PnGJrg3xDUDwmTxsdBhZI6  
OUPkRGqdCApTg91DYT93JysUqI3cUnBTh0vvlUeyL61wdyTpy4D5EcwzBrK1  
TM9huGB+rOCmBk49+e2cw1FrzG+fLub10cKuLuN7Q19tsPfrvPjLcR08Six6  
8PyaPS5QaboBYfrQ7lXo0+ZxgXqSSoHmjmj76G1y3nfxd8M2L73lXQw3wpJ3V  
Pj3ogggXkb7roVSYBuqb6VT/gm2DUw9ozUBp9pLfeJkrrFz6ra2bjBDqZVU/  
auCGz7e/Y/g/MIYA0+d5/3EPjP55Vd+SY4z6DzGTFz090DH5aVFD9yzmvBwU  
m7M88KvqS/vPDWdxihpUoGHOA8YthQeuN5jAkVG9RSn0RO6b423J93+CI/MR  
xZLjhVMSvuvF9yxQ+emptyGyMD9onQhdNFyyg3f041/+uD8wqoj8uqFjC9dAo

/WmnD1z0WIOOn2JbYSYvIFxDxhWGN67C3iRUUzphrPrvji4u9zBYe3XO4d6zL  
z7vRD7+LTkRo/mADA7Hpc6JdAdApSN8iuu3AKAwMsTOno4K9rN09a4f4lAuX  
6I50yJba+fHvssdPrmfeRnvTwV8r8ybhtD2yMrPvRybQMd5W3Xit0R68nC+i  
Sy10MN53X77I/hmSRtIHepSDMaoqNKMbdgHKCq36nM1gJD7MGBiVdgHPvvyO  
woQQzMxY7pzkdUf8wVRR58hwbBj2zUs1eeLNaEn82MJVMMSG4of+sBXRSTI  
yiECx1aakukVARgnbtVMpETBQyBlpu0wHdqj+xfoJ6MRNLr+ka58Ge6C0R5H  
dGIQ+N8DAjTeUFCOxhy3EY1FxAu9902vwlBhnTe9cyoWT5NJ1kDvFUT+MdEv  
1RqH3V41fqK/X8Nve+6eKlyKB3MHv+RmeQQqDTz7Fs4kQKLE6kZ8URQkG1bf  
3qEkwuK+8o5c7u/j8mGabGkiajhd2m3HY8DvK0/tsEkCo6s7FPNALGRjPBn9  
c0ngjVIW2nUwDg7+P5Y7pSWDT5e/7pJCPMLN16SG5FMQdyPWfEgwARHGeV+O  
laWgsFTSTlowESYGtw1DtBg45iZCD/6SCKXxvP6+KgasZShe+6eSwOfkf1cm  
x4RQs+DTrHfjcDMjd77KY8L443X9H3tSYPBaQUWENxXSa7tloYoYUJxdUlcN  
ScV13owh9S4m2p11z5sOp8KmlF662JCKOtreNJUTaXh2KOxtwv00MAeSx67l  
paFVb0hNtTgdo4ECUv4LadC11rRVTM3A9gqrQRbpKCu2/RxOI6D/oG79XVY6  
gj8YnvVsJrDWWVtUOJoOAUmqIcHJTKyOVbmJqGbgHek7UVCXiWi2Ya0WPQNR  
OXvdypRuIpwe7Sxen4Hp2E4yv+Qm3AzMnHxWM5DZVGcnJpWFjCNPJFrFCewa  
L38WcTsLBbEMs9e6BGhJUupMiWzsi351g8eWQEt46355Ihtsv876bwMJ7PiZ  
/pAtlIOJhXeZGykeUUmJspioSc9CjJFGym02g73DttvNmDnJp01nsRgKzf0s/  
//cqC/9slbF+6CFgWN6sKLPIQk38RPfXSQKNhXyVassFKa9UXV8T0CDdf6o  
/mcW8gM1rjZwLRM3b+i0zskg4+aw3xSBDSf5X25RSFySC+0d/ECg/ntG3j5h  
Erl/LgdVzRBQvOIgKKRFwtZ8+o7ploH8gLS5Mtok5rJXe9lc7/VYkVLXIVFV  
0Lm4yTXFOu2w+UkS/+QMb1QtERg53GbcNCLh6PIVwisEWGOH4vhsSDxvPjnb  
v0pgz0DobjFbEnxpvg2qawTiu/7KVLInsUbmP47nOrjJqeiMIwlnvR0V2hwC

FlnEH3HuJJaQ/10dtU7g75QRWpYHCeZ0B22Wa71olS62F4neGedOo38JqPi3

v27zJaEmPcxe4vqOu7Bbrz+Jgy3PVk02CIhfcJkeDyTB2hrTLeKasKoIWqST

CBCX8uZwzXd2nfP1MonC03EpFpsE/gecQSEe

"]]]},

AspectRatio->0.6180339887498948,

Axes->{True, True},

AxesLabel->{None, None},

AxesOrigin->{0, 0},

DisplayFunction->Identity,

Frame->{{False, False}, {False, False}},

FrameLabel->{{None, None}, {None, None}},

FrameTicks->{{Automatic, Automatic}, {Automatic, Automatic}},

GridLines->{None, None},

GridLinesStyle->Directive[GrayLevel[0.5, 0.4]],

Method->{},

PlotRange->{{0, 1650.042}, {0, 1179.675655}},

PlotRangeClipping->True,

PlotRangePadding->{{Scaled[0.02], Scaled[0.02]}, {Scaled[0.02], Scaled[0.05]}},

Ticks->{Automatic, Automatic}] \) \!\(\\*

GraphicsBox[{{},

{RGBColor[0.368417, 0.506779, 0.709798], PointSize[0.6], AbsoluteThickness[1.6],  
EdgeForm[{GrayLevel[0], Opacity[0.3]}],

```
{RGBColor[0.368417, 0.506779, 0.709798], PointSize[0.6], AbsoluteThickness[1.6],  
EdgeForm[{{GrayLevel[0], Opacity[0.3]}], PointBox[NCache[{Scaled[{Rational[1, 2],  
Rational[1, 2]}], {Scaled[{0.5, 0.5}]}]}]}],
```

AspectRatio->Full,

BaselinePosition->(Scaled[0.1] -> Baseline),

ImagePadding->Automatic,

ImageSize->{10, 10},

PlotRangePadding->None)\)      blood

\!\(\\*

GraphicsBox[{{},

```
{RGBColor[0.880722, 0.611041, 0.142051], PointSize[0.6], AbsoluteThickness[1.6],  
EdgeForm[{{GrayLevel[0], Opacity[0.3]}],
```

```
{RGBColor[0.880722, 0.611041, 0.142051], PointSize[0.6], AbsoluteThickness[1.6],  
EdgeForm[{{GrayLevel[0], Opacity[0.3]}], PointBox[NCache[{Scaled[{Rational[1, 2],  
Rational[1, 2]}], {Scaled[{0.5, 0.5}]}]}]}],
```

AspectRatio->Full,

BaselinePosition->(Scaled[0.1] -> Baseline),

ImagePadding->Automatic,

ImageSize->{10, 10},

PlotRangePadding->None)\)      liver

\!\(\\*

GraphicsBox[{{},

```
{RGBColor[0.560181, 0.691569, 0.194885], PointSize[0.6], AbsoluteThickness[1.6],  
EdgeForm[{{GrayLevel[0], Opacity[0.3]}],
```

```
{RGBColor[0.560181, 0.691569, 0.194885], PointSize[0.6], AbsoluteThickness[1.6],  
EdgeForm[{{GrayLevel[0], Opacity[0.3]}], PointBox[NCache[{Scaled[{Rational[1, 2],  
Rational[1, 2]}], {Scaled[{0.5, 0.5}]}]}]}],
```



```
AspectRatio->Full,  
BaselinePosition->(Scaled[0.1] -> Baseline),  
ImagePadding->Automatic,  
ImageSize->{10, 10},  
PlotRangePadding->None]\)      gi
```

```
(*-----  
-----  
-----next mouse*)
```

```
vn=readTac["C:\\Users\\exx\\Downloads\\plusminM7, Liver 2.214375, GI 0.688,  
ID 4366.csv"];
```

```
Lv=2.214375;
```

```
Gv=0.688;
```

```
id=4366;
```

```
vn[[1]][[1]]
```

```
{{10,385.356},{30,741.677},{50,430.83},{70,201.232},{90,136.449},{110,108.145},{  
130,84.6386},{150,70.1034},{170,61.7797},{190,53.2503},{210,44.9279},{230,40.3  
033},{250,36.1053},{270,32.8793},{290,32.5473},{330,28.6481},{390,23.8542},{45  
0,21.1225},{510,18.1687},{570,16.4068},{750,12.1927},{1050,8.51371},{1350,6.58  
992},{1649.98,5.40527}}
```

```
model= mouseModel[Lv,Gv,id,26]
```

```
ParametricFunction[\\(\\"*
```

```
GraphicsBox[RasterBox[{{179, 179, 179, 179, 179, 179, 179, 179, 179, 179, 179, 179, 179, 179, 179, 179}, {179, 180, 180, 180, 179, 179, 179, 179, 179, 179, 179, 179, 179, 179, 179}, {179, 179, 180, 179, 179, 248, 248, 178, 179, 179, 179, 179}, {179, 179, 180, 179, 179, 253, 248, 179, 179, 179, 179, 179}, {179, 179, 179, 179, 179, 248, 248, 179, 179, 179, 179, 179}, {179, 179, 248, 248, 248, 248, 248, 248, 248, 248, 179, 179}, {179, 179, 248, 248, 248, 248, 248, 248, 248, 179, 179}, {179, 179, 179, 179, 179, 248, 248, 179, 179, 179, 179, 179}, {179, 180, 179, 179, 179, 252, 248, 179, 178, 179, 180, 179}, {179, 180, 180, 179, 179, 248, 248, 179, 180, 180, 180, 179}, {179, 179, 179, 179, 179, 179, 179, 179, 179, 179, 179, 179}, {179, 179, 179, 179, 179, 179, 179, 179, 179, 179, 179, 179}, {0, 0}, {12, 12}}, {0, 255},
```

ColorFunction->GrayLevel],

BaselinePosition->Bottom,

ImageSize->{12, 12},

PlotRange->{{0, 12}, {0, 12}}] \) \!\(\

GraphicsBox[{{}, {},

```
{GrayLevel[0.55], AbsoluteThickness[1.5], Opacity[1.],  
LineBox[{{9.0909090909090909*^-8, 9.090909090884856*^-8},  
{0.0874367476365131, 0.08197166587636243}, {0.18222810297558026`,  
0.1358255024317191}, {0.27073779576926765`, 0.13315455086535802`},  
{0.3575112797365835, 0.08143316377978886}, {0.4516394623155443, -  
0.007347854733426912}, {0.5394859823491253, -0.08816932746972758},  
{0.6346872009943513, -0.13787329990112937`}, {0.7281522108132057, -  
0.12816574147938434`}, {0.8153355580866803, -0.07001063326902106},  
{0.9098736039718, 0.02121659675083076}, {0.9999999090909091,  
0.10024804094746914`}}}],
```

```
{GrayLevel[0.55], AbsoluteThickness[1.5], Opacity[1.],  
LineBox[{{9.0909090909090909*^-8, 9.090909090880112*^-8},  
{0.0874367476365131, 0.08090369567458766}, {0.18222810297558026`,  
0.12746559200130417`}, {0.27073779576926765`, 0.1116266937044405},  
{0.3575112797365835, 0.046963725126600256`}, {0.4516394623155443, -  
0.04509050859182233}, {0.5394859823491253, -0.11115559892361665`},  
{0.6346872009943513, -0.12642564594664163`}, {0.7281522108132057, -  
0.07740196037964171}, {0.8153355580866803, 0.004179083230780074},  
{0.9098736039718, 0.08937493944143977}, {0.9999999090909091,  
0.12834702174618903`}}}],
```

```
{GrayLevel[0.55], AbsoluteThickness[1.5], Opacity[1.],  
LineBox[{{9.0909090909090909*^-8, 9.090909090875369*^-8},
```

```
{0.0874367476365131, 0.07984396759533968}, {0.18222810297558026`,  
0.11939549826670079`}, {0.27073779576926765`, 0.09184904274707059},  
{0.3575112797365835, 0.017913117173780694`}, {0.4516394623155443, -  
0.07109962300031061}, {0.5394859823491253, -0.11717052830989395`},  
{0.6346872009943513, -0.09879571259704382}, {0.7281522108132057, -  
0.022693471356141894`}, {0.8153355580866803, 0.06128703302641453},  
{0.9098736039718, 0.11605625481609519`}, {0.9999999090909091,  
0.10415981267620744`}}},
```

```
{GrayLevel[0.55], AbsoluteThickness[1.5], Opacity[1.],  
LineBox[{{9.09090909090909*^-8, 9.090909090870287*^-8},  
{0.0874367476365131, 0.07879243663407876}, {0.18222810297558026`,  
0.1116081822210312}, {0.27073779576926765`, 0.07372482040530459},  
{0.3575112797365835, -0.006267252216927747}, {0.4516394623155443, -  
0.08743897872291118}, {0.5394859823491253, -0.11109134853087661`},  
{0.6346872009943513, -0.06371549528296311}, {0.7281522108132057,  
0.02544576624054603}, {0.8153355580866803, 0.09464282937855747},  
{0.9098736039718, 0.10731931496853601`}, {0.9999999090909091,  
0.0516787429232188}}}],
```

```
{GrayLevel[0.55], AbsoluteThickness[1.5], Opacity[1.],  
LineBox[{{9.09090909090909*^-8, 9.090909090865543*^-8},  
{0.0874367476365131, 0.07774905743802465}, {0.18222810297558026`,  
0.10409673959866513`}, {0.27073779576926765`, 0.05716133039337165},  
{0.3575112797365835, -0.026084496726167965`}, {0.4516394623155443, -  
0.09591154799603378}, {0.5394859823491253, -0.09685594593277226},  
{0.6346872009943513, -0.02730376120671303}, {0.7281522108132057,  
0.061646715198529656`}, {0.8153355580866803, 0.1046634148537508},  
{0.9098736039718, 0.07509702498429204}, {0.9999999090909091, -  
0.006536873471333553}}}],
```

```
{GrayLevel[0.55], AbsoluteThickness[1.5], Opacity[1.],  
LineBox[{{9.09090909090909*^-8, 9.0909090908608*^-8},  
{0.0874367476365131, 0.07671378556951527}, {0.18222810297558026`,  
0.09685439581479163}, {0.27073779576926765`, 0.042069810325321415`},  
{0.3575112797365835, -0.042006785469922474`}, {0.4516394623155443, -  
0.09808544986431629}, {0.5394859823491253, -0.07760167026270944},  
{0.6346872009943513, 0.0063643674428021085`}, {0.7281522108132057,  
0.08405712128907425}, {0.8153355580866803, 0.09555213349985489},  
{0.9098736039718, 0.03202960165577907}, {0.9999999090909091, -  
0.054402034659985464`}}}],
```

AspectRatio->1,

Axes->{False, False},

AxesLabel->{None, None},  
AxesOrigin->{0, 0},  
Background->GrayLevel[0.93],  
BaseStyle->{FontFamily -> "Arial"},  
DisplayFunction->Identity,  
Frame->{{True, True}, {True, True}},  
FrameLabel->{{None, None}, {None, None}},  
FrameStyle->Directive[Thickness[Tiny], GrayLevel[0.7]],  
FrameTicks->{{None, None}, {None, None}},  
GridLines->{None, None},  
GridLinesStyle->Directive[GrayLevel[0.5, 0.4]],  
ImageSize->{Automatic, 28.4375},  
LabelStyle->{FontFamily -> "Arial"},  
Method->{"ScalingFunctions" -> None},  
PlotRange->{All, All},  
PlotRangeClipping->True,  
PlotRangePadding->{Automatic, Automatic},  
Ticks->{Automatic, Automatic}] \) Expression: {Bl,Li,G}  
Parameters: {k1,k2,k3,k4,k5,k6}

]

```

Manipulate[Show[ListPlot[vn[[1]],PlotRange->Full,PlotLegends-
>{"blood","liver","gi"}],Plot[Through[model[k1,k2,k3,k4,k5,k6][t]],{t,0,1500},PlotRa
nge->Full,PlotLegends-
>{"Blood","Liver","Gi"}]],{k1,0.001`0.2`},{k2,0.0001`0.1`},{k3,1.`*^-
6,0.01`},{k4,0.001`0.2`},{k5,0.0001`0.01`},{k6,0.0001,0.01}]

```

```

Manipulate[Show[ListPlot[vn[[1]], PlotRange -> Full,

PlotLegends -> {"blood", "liver", "gi"}],

Plot[Through[model[k1, k2, k3, k4, k5, k6][t]], {t, 0, 1500},

PlotRange -> Full, PlotLegends -> {"Blood", "Liver", "Gi"}]],

{k1, 0.001, 0.2}, {k2, 0.0001, 0.1}, {k3, 1.*^-6, 0.01}, {k4, 0.001, 0.2},

{k5, 0.0001, 0.01}, {k6, 0.0001, 0.01}]

```

```
Clear[newmodel]
```

```
newmodel[k1_,k2_,k3_,k4_,k5_,k6_][i_,t_]:=Through[model[k1,k2,k3,k4,k5,k6][t],List
][[i]]/;And@@NumericQ/@{k1,k2,k3,k4,k5,k6,i,t};
```

```
fit2=NonlinearModelFit[vn[[2]],{newmodel[k1,k2,k3,k4,k5,k6][i,t],{k1>=0},{k2>0},{
k3>=0},{k4>=0},{k5>=0},{k6>=0}},{k1,0.008`},{k2,0.0001`},{k3,0.0014`},{k4,0.001`
},{k5,0.008`},{k6,0.0001}},{i,t}]
```

NonlinearModelFit::eit: The algorithm does not converge to the tolerance of  $4.806217383937354 \times 10^{-6}$  in 500 iterations. The best estimated solution, with feasibility residual, KKT residual, or complementary residual of  $\{1.68144 \times 10^{-11}, 0.000513523, 3.75869 \times 10^{-12}\}$ , is returned. >>

```
FittedModel[newmodel[0.0121451,5.86338*10^-
13,<<22>>,<<23>>,0.0102776,5.86338*10^-13][i,t]]
```

```
{fit2["AdjustedRSquared"],fit2["AIC"]}
```

FittedModel::constr: The property values {AIC} assume an unconstrained model. The results for these properties may not be valid, particularly if the fitted parameters are near a constraint boundary. >>

```
{0.967556,957.983}
```

```
fit2["ParameterTable"]
```

FittedModel::constr: The property values {ParameterTable} assume an unconstrained model. The results for these properties may not be valid, particularly if the fitted parameters are near a constraint boundary. >>

|    | Estimate       | Standard Error | t-Statistic          | P-Value        |
|----|----------------|----------------|----------------------|----------------|
| k1 | 0.0121451      | 0.00167532     | 7.24945.82404*10^-10 |                |
| k2 | 5.86338*10^-13 | 0.000760698    | 7.70789*10^-10       | 1              |
| k3 | 0.00181397     | 0.000197582    | 9.18085              | 2.07817*10^-13 |
| k4 | 5.86338*10^-13 | 0.00035982     | 1.62953*10^-9        | 1              |
| k5 | 0.0102776      | 0.00177851     | 5.77878              | 2.22611*10^-7  |
| k6 | 5.86338*10^-13 | 0.00015303     | 3.83152*10^-9        | 1              |

```
Show[ListPlot[vn[[1]],PlotRange->Full,PlotLegends->{"blood","liver","gi"}],Plot[{fit2[1,t],fit2[2,t],fit2[3,t]},{t,0,1501}],PlotRange->Full]
```

```
]
```

```
\\(\*
```

```
GraphicsBox[{{}, {}],
```

```
{RGBColor[0.368417, 0.506779, 0.709798], PointSize[0.016666666666666666`], AbsoluteThickness[1.6], PointBox[CompressedData["
```

```
1:e]xTTMoPSmViYGCQAGIQDQEqDi9K+PdvFK1wgPDtHP5Mj1qapdsO5Xs6/Djz
```

```
dqf72yoIvyHQ4VFdWVmGeiaUH+ZQ8bPnVxRfIpQf7fBERvu5I2c0hO+Q4LCy
```

```
+Z/VPY1QCP9AkkP8+unO89oCofKpDt9ZNy07/dgPKp/uwPhjeQjnAi+ofjbd
```

```
wkqOP0fK3KDyOQ4Rc5/pXVZzgrcnO6zUYF5TxesE4T8ocNB/px/QU+AA4SsU
```

```
OUR03mngdYPyF5Q4nPRT43691AbCT6hwqMv56rnmljlUfY3D5jdZeTHyplDz
```

6h30yVZ+N9I2gvAvNDosXb10ST3DAMIvaHdYdOvG5dVJGhB+XgSHQAfX2Szs

ihC+xFSH9dbhDsIxUg4lW0V/vz4+0+F0j2LVv3miDgCP33Pi

"}],

{RGBColor[0.880722, 0.611041, 0.142051], PointSize[0.016666666666666666`], AbsoluteThickness[1.6], PointBox[CompressedData["

1:e]xTTMoPSmViYGCQAGIQDQEqDteOteE3fmhDuAOHbOTzmXnL11qI8KN/TQYVx

y3fjjIIvyHQwcKm+Gj0jgYoP8xB6y7Tug/fmqD8aIe1qnqCllubIXyHBAfr

Yn70/Seh/ANJDiKzX6mkJbRA5VMdbDTods/wb4XKpzulOTxXkToH5TtkOcwS

Yytr02qDyuc4qHz92dzjBOU75Dtc5lOZYvwcqv5BgYOahsl/udVQvkKRw+2i

zjqLX1D7FpQ46EosY/h0AuqehAqHliTtDC9zqPsVahwuPdl7t04i1H8P6h2+

HWl5ZBFfD+FfaHT4d9hn4qTwWgi/oN1hmVpa0vznFRB+xgQHudczVsrPLYHw

JaY66LU37atkLHQo2Sr6+/XxmQ6Lm58Em73KdgAAEXR3eA==

"}],

{RGBColor[0.560181, 0.691569, 0.194885], PointSize[0.016666666666666666`], AbsoluteThickness[1.6], PointBox[CompressedData["

1:e]xTTMoPSmViYGCQAGIQDQEqDtOrxfbNNbR1gPDtHDZlB9Ptck6F8j0dkhvm

n5k1ORfCbwh0mLxfoe+XVyGUH+bwaNGSi+cuF0P50Q7S7aHi3SvKIXyHBAft

x1aK/TuqlfwDSQ6W062ib8+sh8qnOpzztFwpWdwllU938DHvdDQoa4bKZzl0

mgm6W7xrhcrnOBziYuR639IBlc93MH+aumJpQTeE/6DA4W50kjkTcz+Er1Dk

YHz39RI724kQ/oISh4LEuxXqnVMg/IQKh98TIYzO/JwBVV/j8G0q+0vLy3Og

5tU7eF0ynfyefwGEf6HR4e/t1P3TuhdC+AXtDtNeTu/Qn7oEws+Y4MCW1qok

emU5hC8x1aG/yGD2hRMrHUq2iv5+fXymg6xtXX4072oHA0gUdyw=

"}], {}, {}, {{}, {}.

{RGBColor[0.368417, 0.506779, 0.709798], AbsoluteThickness[1.6], Opacity[1.],  
LineBox[CompressedData["

1:eJwUV3c81e8Xt4mSJEoISZkhK/F8DIlJSNZ18UX23nvvve4okYiMlKwQKpXs  
JE1EtozMSsn43d9f93Ven+ee55zzvM/7vI+AraehPQ0VFZU6HRXV/3+VNz6v  
eR+kwgiVwhd3UR58y5ypXgoYxR5svw2z3LwFkV28vg8CfmChD4h0wdW34O30  
ea00gB0sPs1aa1ToFmyud6qHBRyA7Nb7D09x5gLLFquKXwAvVIgLfOQ7dgN4  
zO2oRq6cAKuvjvsv5KBa/TrRGEOP5ClHh/XLSSDiIrMPUYXQbBOb7dZEyHD  
lZ2vYh+PCsPrm1xEL3USkMjIznsFSECA5Ef4TiRAgcTorZO2kqBs+bHc3YYA  
paOJ25+unIUi9nqHEEkCfC1Y/laQIwV9g3xWQj05sLx7sZjeRQYIqdaLBMyc  
YH++LPL+qDyUppovPM3NAnNMXcEjQAVqlUy/xJ9KA8lE0QLp3yqwxKcYZvIx  
FWjestH/8kfQ1/vfHZaEVKi0Gh0M9cdgXXRD8dhCCuyiC43qzQAnrufKhbYm  
g4HVB0PDJ2owkfyhSCspEZRitBhk/6rB9qmeQBWNRBAqbX5y5PxFWLD3N1un  
SYS/Pwr5h5ouAkfbxoOsqAS4G+6+/F+TOnz8+6PZLi4efuYzpLg3aolpZnz1  
0YNYGGsLVtHf1AS7uH+Vd/1ioWt6aVVKQQtuibM/l10Jhdvi701/NmiB5zW/  
0XMDMaDZeudUaIM2cLod5bfaiYabI4ovkh7rAL1A+OCOTxTE7FX6ufzSgUu/  
JSoF1KPA7eSJM7pyl2G28tWHniNRoOpKn3nw8WWo2a1x1fOPhIWtdxbkel3g  
STVErzgi4AK365/iOj14eST+39XoUGif9F+9tKIH7N5zEfyKoaBbGfV9RVQf  
PmhxVNashICVMvnLhbv6MMnBpc1hEwKqj6y/OmsbQMd8e36JbjDYvUttpVa4  
CrfVHN6raQRcuVx20wejq3D2asW2MWMg/Mgl15f5XIW8po3fB3oCIMC26MGV  
qqvw3n2wxf5qACRuNOTnnjKEa36ChxMc/eH+kckwaY5rsBDxO/FYtS8sB88F  
0clcg/FceefHob5wbmzJ77P+NZDlEXvzVcsXWks33cJTrwGdDb1j14QPvFE4  
YNINywSm0pfnFo77wCpOUcVmzQiw3nRHoXlVkc/I2MnqNwH8o9lY3bNuUHL3  
XbZ/0QSW8ixVX824An+ZiRvLPIowm7ag38p3BZZqvpH4i6aQeiyt7M4BVxh/



UdUU0mQK/bLGRMKmM6TM9Pva3TWDv2OWCTFLjrA3L1NZ9NwMxGJv03BVOYL  
f

Mnly7KsZ1Lq90q/v5Qj/bVpdxXHhQKG4fqTwtwPI7luR1EvDQc7e2ej8ZgcY  
Ez+4oBBgDhcluDrv6NnBNWlfAX+COej3LXuUHL0DLrnPZrXV5hCj8MP43Mx1  
qEN3OsUXzYHHmfXvfPh1SDI4e0/AGg//7FpkCY9tQcZP35pFwxlu+0ycblC2  
gYSWzE9jvFbwuOLtC8WLLrDyLzCUrGIFcURma69VCzBTtubXs7QCAV6LD9kF  
FiD6VMrlab4VnJcfVUjawcPbZ+928o7/B481onP3XpvD/onknAf7reFCIfZ/  
uxFmANS7dkk81uDemWVQc94M/AV8FOzEraFoREbpc9TGLMx/3pc1xqo/R8/  
wnmYQs2kqHBqqjXcXGCUzXY2AZPp3ifOzDZgyUflio82ghQ6SNPgotoEF96Pa  
MVpG8Fyo3kpA1Ab8G3wUTrIawRn7fNqhSzYwqvLnts7ta/Bvxu2KdrINjPjF  
P9h5aQiFwcwmhJlsIUI+8Ymn6FX4wBhTR3PUFryOvOj99tcA9p35HT922hby  
v9taD3UbgI/TmChZyxamqRRWbF0NQGO+yo8+0RbErd74XXLWh4UFfaZp+uuw  
8puKRfOpLmj+nF+s5rgOy62coVbeunB3J/Zt+MnrcEk6JgIT1gU8WxOZS5Xy  
Lvnb9w1zLkOfHP+py2HX4Z+uSH2Mrw5URa2q1q5fh71QhhZrM21gTkk5FUlt  
B5V9+VocR7XBgSC0T5fNDvI+nS/y/qIFJ0rNBmYk7OD8MhEniNeCrN42q2PO  
dsApK9wn5qQJPpzZoVHf7GDrh49L8B116D8h9t+VZTu4IelbT02sDqlir9W4  
d+zgyvdH2cf0qcPUhb/76rntgTdx1n+96yIY2djcnDO2h/P8oc0C/9RA/oH0  
Y70+exC1/jN8MUgVtlQHL3meOECx/IjN+k0VMHCW3He62wEOuhi8uKiuAqVZ  
KSelhxyA++YpzcRVZbj2Tc1M468D7EiseQxfVoYHYXUv3M87wndNTgbnAxfA  
qpFIfPbEER6xnTf4/kQR6sdWq7q6HcGiZSpjxFcRmBmudA800UL95yvachKK  
0GhEvzv71xH6lSGkuFgB2Nb9HQ8qOUFifmtMfq48vBQ3VbJudgJP2+fWPOWy  
cNSozsilxwlyf5AqaNxlwSP0oKffsBMwm9tK58jIwvGezuKkLSdgqLPE3Xt+  
DvwcFQ/UKDmDjsejsOEDAjfPTZO3eIMjLxmtztVpSGs23+LpdcZPv335LIT  
mzQMrr7j4BxxBl2ht9rkb1IQiaVcEv3nDEe5TuQRlqXgy9etWsMLLiDw42pK

f+pZSOH6Gl/c4gLLGmYmth/F4W/G3FPbXheYa9fnuR4nDk4MG78ERlZg2GyS  
sJasOGj82udQu0UC9mNvVqrIYkD1XkHx9nlXYAg2jmm1FwX/DALDjUZxAL9v  
L90regam6e8gk05XOCfhxTU3exoMw+8HHPnsCs/6yzJeFJ8GKbcXs4TfrlCo  
Hwb3T5yGhUsrHVlybhDm1st/mF8YrOkvJ6bUucGltGoRFUh6A8zeX7plRvc  
76ajLWQSApWfNptM793g035GT70Bk8A9FeSYu04GXOIpZ+/anISPbaVacdLu  
kMHEF0mcKgg6YTRMEY/c4f1RIRm9LX54snEAVJ67w+anUrHbPfxwxvVY0Ha/  
09AKyqR55/EDvbnU95Bld3hlptxcivihTcGqK1DCA8yV2eAc5wmQ23iS5F3p  
AVxV32sG/Hmg79ri04FmDxAbdVGSF+MB23qe44NdHvBALjiov4njkoE+VBm  
1gNmri20/tQ/Dt831Qc3+D0hYafswLocN9zafns8gOwJ9M4P0oknj4KUJbW9  
8D1PeN5hw6o3zQUdT2WqPtV5AvM957CH97hgI4IECu88YeHkcVZTUS4ojXoo  
s03vBarX/EeFLnACFa2v6VPwgnIDL3f9YA64XMcSdkTbC5xaDgeXXOQA8vWS  
Qnd9Lzhl3yiSwMoB4u0f53mtvCBYvsV+/t5hwMURhkWEeoE611kephF2qGXc  
LcQavOBO21mPKMtDYL8/eeGFmDeM+b/aYfE/AFW9MfebznDP9a/gxM4AL9T  
wlweXfCGKZtWb1L/fkjY57WQf9kbHvKI9PaI7YdSBtOFQFdvSMTt7M2vMsN3  
qlMLEpXeEIgTaxwoZgKpNr77QnXe8N/J9wL9lkwQFHnU5XiLN6XfdYjyjIB  
0y7LAI0vN8xz7I53zGIEkX/r81ML3iDQP0ViSGYAl19t87miPsBQcV1HLZ80  
auubK7JkfGB8neN9rQ0dbPnWOycq+cBm4ZGJ7tN0kLpeNu+n4wNeaTyK049p  
4cFKxry+iw/0Gk5Hkodo4Me8xTz9fR/g5qh46qBCDfIVJhXbNT5QPtKs5Lqf  
GiKcDJw3nvhAQ80l6n8jVMA6d3F+vNsHiBIOxxvCqEByWnS+Zd4HLDzesl8m  
7WFeY3++e4v4gu8IA4/+521MNYdeekLKFxhde693pWxjZzTZQwwUfWEImrp1  
P7aNjT8UYzIL0Rm7BZKdPyr+YQbhVhJLdr7QfNLx/aekLUyKp93bodAXbtc+  
7bvH/AfbP2DQ/LHMF374m1x4d+YP9j12IEbjEeV7R6tdw/dNrHDxN+HkM19w  
2DsYGeayibG1iDSMj/hCXUG/eLf/b2wVI7llzuUHMxo1L39V/MT6DvBc70Hz

A1q1xwoCvj+x8hflqeeF/eDv69rIUeWfmLXIS56jcn7gKtztz+4gQ38+Yk+  
GvpBEf85/xmaDaz6hnmsfoYfRNUXID8MX8M8P57ar07vDw1Zzg0o/wdmJp0y  
lb7fH4Stktjl9X9gkL7c/PmwPzSx1w3/ovmBsWk0OrsK+oNY6bV3HW5LWHW9  
dmcO5g8+FR81Ay8tYusE15ijYH+odBPEW5yax4ZX3uLEov1BYL/6gbWp79jL  
y7LS/kn+sIwxMEoVf8cItDvfmG74A90Jrv2lJ79jsr4ZKIL1/lD34cimvvgc  
FmBY8ydi2R+00o5G9pjPYFZVRwa6fvkDu943feWTM5gmc0gZ+44/KAru60BL  
0xjXSzWTUpYA+KxY1L8SOY01SX+oe3MmABruFsUPPZzC/rJtevBcd4CJhYt6  
GYKTWNhb5ZknnwMg+mTApbNvxjAbJRqzu98CYGnxw7RWwBimea+zJ2UuAOB9  
7s4a849hh0INq/GbAbBszMepFTiKlQo7he5wBkK/8y15aamv2NtwwiFVkBw  
tnsmuN47hNV/N4sTsQqEJ8uM1KKxQ9ita3ybhxwCiftLqMrZC00YnUjF10n/  
Qlj//czw5sMv2J8Pz8riSIGwZCZwsTTvMyYovqDS9SEQ1GpZ66ZvfcQYbzyq  
rv4aCMGfm+ZXLD9iS9T+J3OnA+HLF5WvpQIfscbPe0wuPwPhdmd/ElvlB0w3  
9sgHFo4g0BWvbSt6/R4LGAYX/WtBMG39a0b66CCG12AYVcAHwZ8/rLJCM+8w  
q07V578eBEI+l0JKa99hLakmcms+QcCYeGvCSP8dVijtRkXICQJFqb1WycwB  
rDvpBvnTuyDA861aMuv3Y2rfV7IVhoIgtMpxWHvDdaqpZ1+czwlaB8lsCtU  
v8GqGP7Gmq8EwXubttISjdyTpy599j+YEj2zmjYne3FzKN4dWe1gmEi+Fvw  
yKnu7P03fy0t/WDYER5ZkXXrxnSxfrVyk2DQF3RuAJFuDO1GnHexD4apRv4l  
x3tdmGDYUppByTDDM6mJbL+51YguBxdS/nwaDG5J1Pfr6NXb9879tk9fBoHDI  
d0/L1NfYV3mjP419wVAQN2RKd+011v+LbiV4JBgsXqW+0pxqx2p9Hb7u/AmG  
qJHconVm7ViIp0gfvWwlZHvH2IHvS4zZ8ZHbkfshwDsWEUql+RyL+uhEe6Q2  
BD796ip+ufQM+31R8BZHcwjUJWnVxRKfYZP8pM7DPSGwmzJttDn7FGseDhFk  
XwiB4ZUqFZMbrZiLnuYXVtFQmD2zXz79ZDM23rrnwSoTCpvzxx1+f3mCmYg9  
oWdVCgUxiVP3ZTOFYGpM4uc06IRCb5sb1endJoz75aEMFpdQaOnrnSmcacR6

5EYvMt0PhcfSOnHzXx5jUEIeZqyl+Lcp+JZ96zHWwG7gzdgcCt9LEyWLB5j  
d1deFjD0hMIWu/y9R1P1WEhF+V+6hVCItSg+r/i3DhPI9XtELRoGii4eFaVq  
tVhhqoQmtUwYoDvnPVNZazHOrdmvVEphkDm9y04/UoPRfMYxU+mEwfPuhxrV  
/jXYcBZmv+scBjsCR7Maa6qxVDqW4/8qwiB+rRqnl1CFsR7Ph481YdCh5vu0  
W6oKy5KWcHj0JAwau05Sy319iBGt9Guud4fBLmkiZkDuIZbfRNDq+x4GhpJv  
5wc2KREqNx6/26fDQeujLnP3zQpMKvZhbuDZcli4ydbPfrUCq81Fz68qhMOC  
MV/DKeYKrLHDmplBKxz6X5O2b0eUY2389wo9HMLB3muiJNerDBv8IPEGu0c5  
j3tnPB9wDzNafLZ+7GE4NFnU5nUo3cM+URsc/VkfDsmDk3d190qwEUmf6+Xt  
4fCquij2ckoJNp3U8Jdt0hyGXUp8x8uKsd/KmPCkYATcv3134cNeERZ0beBy  
q2gEVIrsp3F8U4RtOdt4k2UiKPinjibkFWF75NhWHbUIuD0fcNDpfBHGtNZp  
WGcTAQm5Ey3JoYUY9z2DyLjCCLBpZzu7dLYAk6r2k/hcFgFDbhdmaCduY5ot  
N0dEHkUALZPt5nzObczn3bjC26cRsFLny3Xsbz7Ws+01emwkAkhSlrd7+vOw  
EJNsm0dHIoGqbDPu8e1cLMvm8UEa3kgI9r9AbjPPxUrdhp4aCUXCn5pV25Cj  
udhgjAD3lkwk3NLky9gg3cREH9UMqhtEgmVueuebmzewEcbBi8MpkRDTulVa  
1UrC1tl/r4nnRMKlrasFY7EkjImPuzAyNxJslj72371MwmRlbbeFyi0BrSXW  
ceIrEUuzXq/3fB0Jr9aO27ExELECI30EGqoosBJ/10Dvk4PpPRahu6kUBU+N  
VGLXrmRiZmpL5VkoCkzi1RqUf2VgNm+rriSrRUGTLqqKvZ2B+c2fuxGiEwX5  
1Ydv/F1Nx27xIlFL8ygQ0ti/Llechs3GGxoIhkSB0Z1wpxsyKdgq+5Ff3BFR  
IGsdk2z+PRn7e+dz7uGYKIhf0me5WpCM7W+2mKJLiYLDbtUfUliTMZllh4C5  
3CgAEej+pc1ELMIkNP/Bkyg455iTGrcUjyVNqajeexoFHUOP8q5XxWPZXISz  
t19Ewckd2YV1r3isjCX+bGZ3FIy4yVVw/4nDep5lvvQeioLKL00IHGscxnm6  
5Lv83yhYtFaU+GEWg/HXO6Sf3YkClc/1HctCMZiIqojMGepo6PasIldi8aU  
8VWhx/ZFgxLuv0ibtGjMNR0JdftoNEzq6E60dUVhjzb7ZF8oRsP2b10C/eMI

jGbvC2+AcjR8DzOPFbKLwEwYZhjEIBr6nx6VaD4cgW1z7HwhakVdaY+svY1/  
OKYjIxHuZBINGbETrvZqYdisW/rrg37R0HfoxbovdQim5Jdb1R4YDYG90jv3  
WoOx9NB7N4JDo2F/2cE76UHBmGzKU+epmGjww/WwB6wHYdFIPw40Zkfd7Ee7  
U2HLgRjP5BUTq0fRsESJjZBH4B5zeOww3XRkNtEe+h2rz/2atX+TFdDNjwL  
shbeyPbHXPbCt6SfRcM6oZ7Lkd8fa+KpKqB/Ew2ZZTf+Yup+2DVT1rkHC9GQ  
9V9ooV+pD5bS1x/471QM8E+8UU0he2IW+NSqPZEYUDfiqqFV9sQkF7RmaCVj  
oIud+VfUpAc2yPjCcL98DLzIveUcKuOBcV+sk+DVjAG+E2L7T4y5YRVPbkwh  
hxiQa6ZhL7NxxUK0jbgvusQAt47KJAunC6b7me2qlkcMmD/my7/U64yt/kx+  
ph8QA9IfLxlpKjpijIhudYJMVBywTWFhscJ6yq11o8pjYEPra80BjI5YLfk  
eBMS7sfA5WAZOsNue8ytfag1pSoGjk/z7EyK2GNsk4aihIYYuGQqqXSMzR4z  
5dWgL+mIgcDHmnlVgnbYLEGk5fVsDByrdded55WCLNqnOrnUvxICSe14Ng4wt  
llJz90z/cgzY//PXntixwSTfHid/+h0DRtN/BYxv2GABzKzeczwyxcES68TDL  
O2uMPnpdeN/pWNjaqBu52WqFjU1x39sSjQX9s5x5xx2ssAbNiyeXJGNBYufQ  
pyw2K8xhP/HEW/IYcA/I5r/kZII13JA7StKMBW5GvvaHghZYQIXQPgGHWMBN  
jp2ReIHDRa4VjbK7xEKOB4tBYxAOk/frpqfziIW+u5diDkjjsNnz3DRz/rHw  
7TmzG0eJGab5umXrQXws0HTYBV0imGIMX3cXFe/Fwp3Ud5VxRGNsDJ12Ea2I  
hSiN9u0eU2OsoUj/+/GHsfBOXym39bgx5uBYOL1bHwsizqIKt+4ZYR3rqqPt  
7bGQIe99k/nFNSxhX3y/wXQs0KVsFfEdMcSs3B7qqn2PBY2IvhcXJq9i8m8/  
9pxbioXuDur1uUdXsVmicCfnz1g48ef+wzndq5gmf9fzr7Rx4GqU1IRPN8AY  
FVhqnE7GwRGPmaKCK3rYGY5wX87TcQC5++o07F7BdNaW5dpF4yDnfcy1K4+u  
YBmVg80nZOLAKKamS5bjCsbJf6v9E8TB3FWyg/PcZUx4n8gXdas4wGve5equ  
uYRpz966tW4TB9SXTpw08LiEubzab1loHwcj9/kGk8QuYVXhqpP/3OLAxYeh  
kbFcG5Nfb1ysDY2DU56npxgrtDCNEc09/tw4ePDDgDu4WwNzaGp60Z8fB1+V

67RUszSwJJJoXFhhHDT8pHt4x1QD69Nn3felLA58D5ZZHPuujhm1f2TPbliD  
o4zntz8fVMfsHtoJ77yPg/OPx09gwWpYbGTMIshWePBbdRyjMcIwoekSy0/s  
8UB/fjJyZAth7dq7u8540FFTC669i7C6Nj3Z7zhi4dqFR0pg18qWEIJqf+F  
ZDy0+vpzb91TxlK6y/Xv68XDr8LDtgQZJUxUsve/MsN4SF+Q6KX9fh7rznfh  
WWISD/A3NFa74Dy230Imq8AqHv5sF25oHDiPZSy3DOR4xMP11nT9wZ8KWPbh  
t1dDM+JB4fDihPJ3OUwmaM0mKCceqHHHzGYr5LDBr4d9/MnxcJdg7Axuchh7  
qVmOZ0E8NFsRRnfXZTGi4uQghedhhLP7Pz8mWeym5a9ruv3xgNuzXGi5KoMp  
vuSyuzRlyf9y5o08XhlsSFjJT/NTPJw9KDR8cEEa416NIMJYPNR5iok8ipPG  
8mOYPsoux80j8TWZm21S2J2y4ya8rAlgOLGm7FQsiaUkJN7/dCgBOlTs6f9c  
lcT87Dd2M48kwNDqjzZraklM+2RvGQ1vAjQ0fVKqt5XA1gtC/s6JjCAbGxHL  
U2fFMXXyUH7tpQQ4T0vMUf0hgkn6a6y5XkmA41U7vGblItgxoqxNU1cTYEng  
3bVTdiLY8qHk5RtmCYBPdBv+OnoGu5GuCOGOCSCsHHgka+g0thB3Y0orPgFy  
pxcN41dPYR+u0ypSjydAu5RTu0LDKey5mmdac1oCPB4Q1Y8P04URqbTkJIgJ  
8EVSqW+B+RSmEvY7gb04AUgMrHyPJlWwLF9j0dG2BPAebcN1ZAlicraHvX22  
E+C1+rHQCdcTmPCRxf3HqBLhcXjHRXruExhn18vy57SJ4MA9fmuniw/7LeEz  
vp8lEQw99YVtRfiwpr8D+mXHEqFNYlrk5QYPppydIfIVPhGYt/ST4CE3Jq7u  
0BOjAj1Uc1izxy5Md5NFQcRlAg6ctUFa4Lc2K7Fj9sBGonAoVSR5ZN3DGs7  
o3vgkFEivBfvWC8nHsXU2/YtaXgnQk+G/gmdUk7KfjuRuOSXCNzDA6Dlyomd  
En5ykhCUCIWVBvhRKU6Mlc0JPx6ZCKutfUjvnx7Bukw7e0IyEoEr6pD33TEO  
7PJKXMWjykSo6CgRea90GDPko3I8NpsICRtDV59cY8NemCUZHFxIBLn2smc3  
TrFhUgQ2JfrlRIjCr5JWVw5irEwCB9Z+JcLnorcc/soHsZ411bou+iRg3p5V  
RhMHMNXXsXuBp5Kg4ErqxyRTFqx6j2XeXSQJ2I1OZBkws2B8SsTB6xJJOnq0  
2rv+lBnbriq5py+XB04lQ6atp5mxppuvL5/WSAJvXGk9N/0+TMqN8eYnuyTY

Rfa+NDMM2J3SzOg+pyQo3TGRMy5hwFgnuFxfuiXBW8vziv/ZMWBLxmdQIV8S  
mEVKK2XP0mPl2KXp+LgkUK/ObZPfoMP4D6dKyZUkgfSh23YfxGixzCuHucXK  
k0Ainn6l5hcNtpuYRyvwlAmi06fvnG6jwb5uV37aX58E62yfp9+b0GA3Z/vC  
pl8lwd58lDNTKjV2sJm1mzCVBOLH9T8XHqDCujzGf2vMJUFOjU5nQcceijpZ  
K/RngZJ/8PLuiM8eWk8zjrJYTwK66TjHH2920af/8hVOUSdD3EqvnWjGDsqn  
Fy1t4EuG9yq/q/Zk/yHj5n/vnQSTIfjGYavmjy3E6vmG+rhwMtxf/6ehU7qF  
or54WUZKJE0v9/7VS04tdL2ykUNbORk81mLv+LP8RaJXNWKHCmmwNquFZ2bd  
RFP0XDWpIslQh7tid/ndb5Tf/H1MxSYZxL/xhUiQfiNWoTslu07JQJx1W33D  
9xut/R5ccwlMhusajfQG53+hpnxr621iMvSc+/fiS/IG0vweqnJilBlu9wRt  
PsxYRRFCu038H5LhofmXXbf/VtFj6yhZwS/JQGui/6pOahUJdCWjnRpPhmd7  
F7tLKIYQdU/6MbHVZBgJ1HMz1FxGrZV3fsmzpUC/Zfts38NF9HNOwFuRIwUk  
4/NC31stljGhkqXzR1PAQ1ny8h02RXQrv3xKmT8F7HcaG3gCF1Bges07NakU  
CGuPj2DQm0cynq8e6hmkQE9ZoHiM4BxyqdQQMTBKASvzZp3E8VIUNNdZctUs  
BRJTyhh07swiNuu+PCPrFCg+kF2/xzeLfhh8TDb3SgEflVa/FeEZVC4zZ++Q  
lQIb3Xyj2yZT6JuH84QjMQVuxLUdGDoxhTgrFy2cb6bAPYtDm1fnJ1H8ydVr  
boUpcMvm+gGOiElky/FX1ac6BcTfyvlUVU0g3t/MfBEDKRdSt004IzqOzBn+  
jrt9SIHRE1rOuH/f0E3OuWL8lxSoZz1+Yq7oG2JXeCVyfwFBlzjLv9cG0NM  
QaFyP1dSwMuyhBR3exT9/Luo63lwFSaf1bn8PDGCZJiHD+IOp8JJJqd57g/D  
yJ07a1CLKxX4iDy8R5KH0YJSidmpE6lwj9s4OezXEBoPtbaBl0yF/d73n459  
/oL6dvpCTfRSIfEJ94joi0+ImbUFaRimQutj5pu50Z+QFl8FtaxJKthnyhW1  
qH1CL1F84iGrVliiZo441PkRNUWqEPrcU2F0xfR+7+cPqIS66r5aeir0qBnK  
1HO9R5OH8t2ls1NhTViA0WFyEJ0QTJHiJ6XCFSv3rgcPB9EtNYeGnfxU0Lhu  
YLKhMYiyYvleNj1IBQ822iTl8HcolD5zSLlvFcq0JJlJ6AcQTVbH+NDbVCBN

BzoWNb5FKdy7c3HvU4EokS4iYP8W3Tzr/nt4OBUWFqUrKl72owbc5cOJ86kg  
pWeXcDvxDVp7yHjlg0MafDP0UGRS6EVBiphRCnMaNLu8bNFd7UFUrwLwcqxp  
AJeLFrXv9yDWLzPOqUfSoN54RM6Wvvej07QnKAilQZzwleVFjm7kaBLVlqma  
BlNeac83eTvR8nhjp5JGGlgITUT9nehAAa4r/TPaacD0EEflLe1AcVFWoxcM  
0oB/1kO/SroD3b2vvDVnlQad6fIF03qv0ejun3MQlgY/Xe84vC15ha6VeZet  
NqTBmtzEkHBtGzJ7gtteaE6DECvc1MXYNmTVq3p15lkacLPti5syakMuK4f+  
DXWkQcJrPUbdjecoRqFW79WnNEg9yZellfMM1XSu/yL9TgP6Zd90p50W1DA0  
rJO1lQYDh/f1zlS1oNbFl3dSdtNgePHtv4s2LajrIOFSJEM6LJufPHOrqxmN  
m5677cSZDujv5NQ9ip6gg9991S/Ip8Poy4e6zcGNiGMLnyunlA76zw5RKyg2  
Iu796stnUToc3u/i7rXZgISIOG4KaaZDh+aZ/9iCGhAKql88YJIOiY0lXyqi  
HyN3pl854/7p8ICj561CfR3y4R6dGw5OB7rBv3qW4XUoSPy18sfwdPiEjHr5  
tOpQnAFptjs+HXZ/qi56fq1F+TflOpI6TDtx8opyFqLes8ETMQ/Tgeut18S  
o9KqEffjshDIjxT/mVuLz2yqkYvq00GN1nRgVW0/6K1QjZjNITWt2ynxfrRp  
NO16hHRSaSqV3qdDCMu5j/XxVajrR4bfymo6SKbKjx098wAdDWk7UPozHTw1  
Ao9OfqtETgzrpRZ/0qF/2yrb8WYIYjxhPNS9lw48/+1MFLJUIk2D46iENQNe  
fXL1KdyqQO21ZYw48Qwwb3m24vG3DHFgQ4UHPTJA8sOWiEprGbLrZVbqOJcB  
bcMaklWRZYh22t3t3IUMsHw4qeDDVlbUjsi+O6CTASpXjF4ZC5SiF4Ftt146  
ZsD9wsc4Yc8S9Ex5SEK80APOKNdcLfEsQhy3A1gHSjPAOm1EJ129CLnsHF7x  
vZ8BGf5zxVPHihDnM73qlpoMCOeap/34uhC5Y+0yl9sywKk54L9awULEo/ZI  
wWU0A5zpKrQkvt1GPnd1j7JOZIDxV8uMr6TbqItm4U/NdAbksewyXL5yG/m9  
Emr+u5gBacEp962e5aNe9VvKyVsZkPshN0aqIg+FaMWrlNlWrec9vrt07lo  
oExQUPd4JjD+xfsm20QiYaY2mlW+TPg5wvBBSygXDXZtvVIQzoRgAYFC7sqb  
SETHS7NTNh0+32dM3dd2A33RxV+evZoJGpyhXFz0ZKRgKG0sljYJd50i5jY3



ctB+pchYrqxM8Hri6QOvctC4wJsaZmImPH6xZslByEFJa06sa3mZwCv4tNJM  
NgcNZxV2Pq3MBjd7X/zFwrNRxNuDSqa9meD81uq/VuEsZNho6aTzNhNGc9+3  
8G1notN3Kskq7zNB7GfcUEllJhrw0No4OZIJD6gm1rUPZCIB1sgHqwuZwDBe  
MvBkOB3ZCgce1KDPgrGVjHej+all7ugFDFmwfrYkQxVs1Qkz/paRXFFfpzJ  
OzPewpGKWH6zu4kdyAla+0GvhcwUVP+6quvQkSzgKrUM/JORjOjtZ6PHhLIg  
7EhCrUBVilo103Dsi3AWUGmdWvrrl4iGdWwr353JArPl9y6+yomoSjZmrF08  
C4yS4LramwRkQsd3oVI2C+IMwn2P/Y5H5cXGPwPVsyB9NKj6lW0cajQqeqiv  
mQUJq4aM63JxqIP+h8Np7SxAr8mvCfvi0LRj3NCny1lQcFuiSal2FgmI1z2T  
u5YFq+7GskVMsehWPVvyhk0W5D0liqjvjkYV9hZqvdezIAMldZQXR6MmzvJ/  
d+2zgPX8JX/qiGj00QjzMHT0ApOrNZpfz0UjDhWPazVelHh9PwfyIkSh9Ne9  
vJ6RWSCv+Ib9j1gkyg/g+qwZnQUz53Q90hYj0IPT17P4YrNATO8pqbcyAvUk  
b9H0J2RBWu2xLjXJCMSgJ/JdPIMS3/Wi3XqlcBT1KaF2IT8LZF90vD3qFYp8  
5IS1HJqzoON3980M9SAEX+3L7Fsp8Z5uc9NnD0IH3yUz2j/LAg7ZkNai8UD0  
oPld5/WXWSC3zfDqZ0Qgmkm30bbpyYIXTCe4RF8GIDPZ6EsWw1mQj3+oEWLj  
j4RF7lXgv2ZBMx/vCaKCP/rF270PP5YFvRKe/wRZ/VE046Ee3GQWJNF6Z+a1  
+qG+4UId0wXKexsvzg3z+SEsuu2y4VYWhA80+ZRv+iDWgOnKq9tZMMTdLEb6  
4IO+ujDtv7qbBbR7QTKzNT4oyMigT58mG7YdZ/9Vu/ug2tPjuleYs8EyLlK1  
b94bCffvXdHmzgbt0xWPzm54oZ8vT1Zp8WSD8YfVX1MfvdCrRi1WLb5s6HB6  
92GxyQtZF2X2awhmQ+hxjrPrkV4o1++E/kXRbKh1j7/ffMgL7T+OGSClbgD7  
9LzXKMEDUb1JHDyunA1XG4TL3Mw80EbEgNFflWyoD7IU3hH1QMOTNrh61WyY  
XHHyiHvnjsrux9mKXsoG+ecXmtiF3JGaUo8fp1k2KNxc67Mdc0XyS+ybG7hs  
UE9/tXyj0RWJFOCD3+Gz4RCZT0lh2xWx0fwIT/svG6jPFllhWa7ii0e6DiTSO  
2RBOYhTwq3NBQTjj3GX/bPBcL071L3JGbiwFx/sCKfkc9Hv+LcoZ/fd09nZF

cDbMBSVo37N2RpoCQXftwrOBxqkwCBNwRofnb1UOx2VDUP/SFLnUCVUFjT/t  
IGQDIS9TNMMLR1QkKgIlpGzQG3cebL3niIhfvV9G38iGjPYO6bYURxQKtj3K  
edmgjIqC7hs7Im0m4YHau9kQeYC3eWPZAU3dcj0sqMkGGDQoTZd0QMPnXJh8  
67IhzbFIkvuoAxp46ySp9TgbRBUNPkxSO6BWRoeQlaZsyj7yZf+pT/aIHGjN  
Dm3ZcH536ojxtD3SMTVWm+jPBvJJ30j3KTsEG9ecHg9kw1/BZvfAd3ZIIdMw  
I3kwG/aprnlrP7dDQp36w9KfKpMvxRx+mGeHduR1fGjGs8FiMM/lP1M7VM2J  
3T25IA08P8anLleuo9Jala7NH9mQ2xS3ENdzHd3WU17uXcmGXbpY/EjLdZSS  
cF7JbyMbjM9LNR+6cx3Z/T432L6VDfPN9cdiHa8jrk9naBz25cCPmOKv7nu2  
KILEblsunANTvLS6By/aIln/ecmSMznQUEYdPSlvixaM2v7dEc2BGtdLpDZR  
W2TM4UG6IZkDvz92a99gt0XihO6uBPkcUC8QNI2btEFDWVFn7TVzQPXa5x9M  
MTZINm15W8AhB4yFnlh/a7BGC66vu3mdckAqQ0TgW4U1unM5n3zMJQe4DNvM  
JvKtETOLjtQhjxyAJeWw1RhrNJF87zpVQA6YJgW0Guhbo4xEi56x+Bz4Vny0  
veT9f2g+pudG3r0csAkixGubWqH2Ex0J/mU5wDjcx09Qs0IFrS/89Styw01f  
yT42SStk9LvpGu3DHNC7IHlqN4KPXMuo+haT/E/OSP3GiJbjIU76o35ICA  
3/0vriWWyLe44AdfE6UeqivkymxLdGaU1DvYkgNRegt359wsEcEgLIHpVQ70  
W1+4EyhsiTx+RAZwvM6BRtobXklHLJF2Sqj9ckcOFFkZH6gs0S7r3wu3u3J  
AYutaQnPaQvkgCzt28wB7DtdUuhMgukwocCh8ZzwFq+zo90wQIdbTnvUDEZ  
Ax/4vz6z0GuB1k3ljNOnc+Di8kU625MWqDxb/Jzq9xzwqDJSE95vgdjjp6+U  
r+RApxj3J8I4Hi0VcY7FrOWAA2II/dInPOpE7G8sNijvNzwurdyHR2FB+yrZ  
NnMgMuCy9nATHs0tbjoE7eZAUyUzS8iHr1M2jA2pCJABGO/BSkNj/JPrail  
0xDgWnrrPp84PDL8b1ZwnJ4A1kQ2kUk/PBLfnjjUzEiAqWuKYf7ueMSY00pF  
3EeAr3ZyORoOeNQ6+GFM6wAB2jfpdeWZ4RHZc+CNwEEC/Gzc7BIwxCPv/X2t  
/9glwKN5RG/6Mh4Ja7669YiDAHPak6V8gEfUU8+SkzKj0PnvGp6shEdf15uD

rh8lwKm/xcY6cniU/aTGhluHAGP610cdxPBI9Fb80lE+AvS9bqvWFMaj9hBc  
DDc/AYwF/qw/E8AjK7zEUR5BAgiGn7lnxItHfy5QV/EKUeLd8HogdQyPcng+  
XjwhTADRwtWfhkco+e2UD/GfIUBtfodLyyE86hgN8xQUJQAfHfuWMyseWT8z  
oBcSJ8DhtbUMKxY82ioQyjslSYDzEfFHcpnwiBj5R+q0FAEUOxaDjzHgkaR1  
X8cZGQI0Tl0s/0aLR11QaCEqSwCrtQdpi9R4ZCvgy4mT4D3+zQPq1Dh0Ta1  
dpKEIlgGea0me+bBrjsiT/x/nOKhGg63VcY/WO0Tr7aqVOSpkANwqcHg5um6Ou  
4leXZBABBpf+/DpPsW3jbnw7BwTg7zUKn/1nrbtXP3l1Cj5GeWd/UKxyRoY  
i4I6Ach3F/+wUs5LCR8uUtQkwP53dq9TKHYpw5y8kjYBZLdORV+m3Gc319x3  
QYcA9Yp6R69S4tntzLBV0SWAXNI2QN6eObpZbvsH6RHA0togWZSSj0yyfAyy  
EOBDhNOFXRo86nNmFlizJIAqr10wJz0eOeiMPbloRIArJrZnfRnxiEqsVl/D  
hAC31WMucTDj0S2WhBINMwIM00zV/d2PR7JLuFBtcwJUVhabn2TDozd9Eod0  
LAhQFn86K+cwx9D6rLLVgTQ66Ya0+ai+Mv4qHzFmgD0HrQyF49T/q8f7mRg  
R4DlvYLd3yfxqP/s1d2rDpR67qlT3T+DR05sp4jXnAhAnSDJTZSg4P9d33MT  
NwJM6MyWUynikXxtobGZBwGk8l+Uhqng0UCO3yLOiwBnc7f6BS/iEZ0RD5el  
HwHSWu5Uj+vhkesnV4/rYQTYKnVX6HKkfG/E60wjCPDX/AfDBQ88Krhx+JZD  
FCV/+j2hZ5R+GjRree0cRwAl23Wr79F4pDTCzOuVRsGH2oC2Tz4e7Ruv6A3L  
J0Doa/6FxlD4VHr/HL1/AQHSuX11rD/ikZr/U+ReSIBDrx7f4Byh9DvzuxrL  
Eoq/X19a2Wbx6NhH80XjUoq9fidAbxGPGu5MC+mVE8BVRGjCchWPVmx/3EAP  
CHBCQjpt5i8epe9Fv5OvIgcVe2GV6S6lv3pYWM5WE+Dtm1yNTBoL1EkkqZ+u  
pfhLZlNLZrBAdv+diDhRT4D1L5tENWYLRC1a0cjVQIB7v9XONh2wQAU/ZdYO  
NhGAhmeGeo7NAI143irK1EyAjzHvdnoPW6AvyZp2VK0ECLb7d9i00wL5Gw3c  
/vOUAGtbxnIPjlL47oT559XnlPspjPwgWcVugR/NTbPMvKPwi7mIJPBZIt95d  
Z+IVhb8uMGsm8Fqg+YjN2KHXBHgwU7bjyWeBEi5FP33XSYAd03n/LYotyMGy

2d1NAIGN8tuCJyzQ8zGi1MteCt90rzvOUL5bVPC5NL8hQIEg42uMYv/xLS+u  
fUsAE4Whe5IU/yQkM3r/HQHyVS3+VR23QDL7WjmL31P6LTS24ekxC/T2vYZB  
3kcC5PCqdZlyWSC3grfJhM8EKLRNFQjhsED7nHGvUoco+Ig1rBM4ZIFKz01t  
x44Q4N+7diUDSr0u7rrJh40SIMth0ffUPgs03vXb0+8bAaLjNkoq6CwQtxXz  
lN0UJb7sPNGuLTxqPEPksZwhwH/H5Xgdf+GR0QavifEcpf7Xiy8+W8GjjCTp  
bo1FCr/arTkWTOGR2LUWGVSDAIFNPbTioxQ+4tVQll8hQM0e68FQyvygqTN7  
JLxBALuCvzUOXXjkPxpJYvxHgPtZc531FXjEXr7v7d42pV6/SuMzivCoyofA  
9GeX4r+JQ0w5F4++M5aFfqchglbGshNPEh5ZyPTbdDMToXNe1UjaDo/UE3kk  
U7mJ0EKXx1BL6VeGg73JNjxEGBgNd0+i8GsXOXhGgY8I5/QUAs0ofKFb+il/  
WoAI9HWH15fWzdG111ksSIQIM8+bd473U/iOln5+VYEIwRG0Z+UTzJFQap16  
53ki1HIo300MN0ez7LaFty8QoVdpsm7Vzxy5CD431cGI8OqnhfQh03PkrRrc  
UaxJ+W5odKDtojmS6T4tGKJNBOY81SUaZXP00+BTuIEOETxWHB3dZM1RkPU5  
uZ0rRPgcolHTfMocRUX+KDYxJoKkfhpLMLM5UmPM3xM3JcjsRT1U3TmiC5T  
B0+LI8KjrDQuxl0cSiooY6+2IML78K1ck3UcynxqE73PjgioXvHQvq84ZKDB  
NvrNngjrTi/vVn/CUab5M8UGRyI4D+yZer3DlFLX46u2rkQwYebdVenEoYJ/  
H61afYgwUtYfklqPQ9axcc05fkTwZhz4Xv0IhwRZznE6BxBBiDlcyrQSh0q5  
s94cCSFCThB/J0MxDjndRSJLoUQQFGp+d+gODomK/oh7GU6EsHUNScjDoYfn  
dZQ9o4mgEhhixEzEIY8Xf25oxBlhxL1jqCwLh6QulW0cjyeCGMPIM27pOLQ+  
YKy/nkDJZ2KI1ywFh+rN6Cq7koiQX6B+0y0RhwlGaxnupFDed8zC/34cDik6  
2dj6pxFhEfuZwx6DQ62Bz44JZhHBa36Wwt4ch1QuavDw51DeU+OIsXAoDj1j  
7ePjIxLhU29IMG8wDmHDhgl8ZEo+R75IXA7EobZ7Qye5bxKhoHVfdY0/Dql6  
WwsfvUWpv/nLTQM/HHqpPHeGM58IEckDUaK+OKTO5CHGUUCE55P/7DEfHHr9  
/qcEeyERRKn2v8zyxiHNO6FSbHeJ4B/a9egExe5yoTnHWkKk7P9/Lv3wwqFL

8sly+0ujkLRuV7lFsXuo2RSZy4nwVODDsjbl/OU3ZCWm+0R4cIT17BDF7rvJ  
q8LwgAgHnIYTHlDuu2JXgtFVEYFUS3WonRJP/1kxNZpqIuxkaH/np8Sv/69G  
naqWCFvk4NPtATg00KGotVtHBDU7/HxVEA5dzXl+afsxEdKzHmtPhuDQoKWm  
7lYjpR6P9a3/o9TvmmsgbvT9PiMDgqvZzOgqHPvy8dvV3CxEKDWxPXojFIZO2  
4Ws/nxLh2JYzXX4CDn1OtTFZf07BC+0A02XK+5mZfjdbfUF5b3qLy5cycGhY  
0BO//lOlG7c+zt7lWsh88i/LpddEGLeg+61wA4e+PgmzXugkAn7mEUE0H4cs  
42mvf+8mwvab08NeRTg0ZpBiP9tLhMDqvBmWMhwan7vhMvmWgt/uj7XqdThk  
U8fnPv6OCFKyxfenn+DQZMQ9z7H3RLiwd+vdaBsOTR+p8xv+TIQrfGeOjr/F  
IfuJ84FfhojQdk/XffEzDs0+aAv+NEKEF8X0mlfHcWj+Yn/E4DciSOiG9x+k  
9JvLQePogQkiGHs05Fn/w6Gl4ZHY/ilKvdZ//N2k9Ouy93xSzxwRovKMmBaP  
mqP103SElytEMGR06gug8lOvayqpbY1Sz5Z7EVl6FH6QZ7/5bIMI/73XpB7E  
maPfb07cbt4kwqX6SK6nXubo3z+lsto9Cp90Xp/tvEPhAzPvlrsHSXctuobm  
GkU/3R/nGY84RILZtDuNRhT9Y+DcRYc/TALiJM2zixQ9mh9yQu8wFwmwVknI  
UVGKnrrn9ZjyWjwTF4crOpUZ4NHwqmN6anwQ/Ajc5WqzwKKpKSFRZkARa3tL7  
S5wo+ut5q0/PUyQ4LXTafDYUj+wnRRjsJUgQ+E3p24c7eLTf9aOo6lkSnDx9  
0FC2HI9qN6L0eaVJMLDhyqxfjUe7dF9ufpQlgey3V10Vz/GoJD32aY08CZz/  
U02f6sAjHc6zk+mKJCg4rcvR94ai908niGkqk4D2Gutc/jAeKVdLGwgiElRz  
aa9FUPaVScVRv12MBKZzhy/QUvRJ0ouk3GFVEjSu1xYLU/SJpI7ss4aLJMh0  
cWCepcyvD4PfnM0SHA70lMP/cSjEHwqo6cWiTJPD+qL/8Ej/ml58cuXKP7U  
Excf/KPodbdJg90XSRBpfJT2KUW/uP1K96e9QoKhDlp/HDVFT0Scv/VNjwSC  
3Sn8kbQWqllh5lmLAQmOpS9Pi9JbIKvMrKkbhiQIu0hBK0Xf0B1VZvlzIgEL  
71U5jkYLdL9wTtzAhASxOoOR5yi2gQjhqrgZCe5ty1p/oZzfrEEBTOYkELdr  
frxB8VegtHBrGk+CK6rulbco81v9Fel5myUJtnlz1OYpemrhsup0/n8kUPhN

9WeCygJlfVhiCrYhgYi5fVACJX55y5sSxtdJ8KvbougLJb+vMxcNpe1J8PJS  
ksEwfj8Yj5WAA44kaBhNup50mf9nNm/lzTuR4HfyXuPGGkXvRmq2vXYhQblh  
utjBZTzyY1qfLnIjwfqF93kT83jUduySpLkXCWaiWOZrKe/jcPenobwPpV7T  
WPRjip7cL1YYyO5Hgp3g6rQAij4wU95s6wkkgZN2j++FXgo+2u/OlAaT4F/y  
Y+aLryn4uKLHHBtKAqMDNqlsFLysWt27diGSBGvzYW10tXiUHH1ttjKBYnvY  
KSSQKpvCz/qqiCQSoNXXP7gyKPk5cAZeTaH4czjMH5VAwYPuEONmOgnC3cKo  
RgIoepnzPxE1Egk4Lfu/LxrjEc8DF7cvxSRgpK46RneQokc+Ra/TvSDBVKMK  
q0WwOTK9NNX8+SUJrn9lO32K0o9Ureqx99tjkF4nsL3tYI4Mixg5DLpIEFFD  
MPXNyBxtuqbL5b0lQbL3qa/F0uYlqHODpMdi8LBU1FdnlcInvltAN04CNqAZ  
c/60Qzmz+H2fj0jgzeJ0NJPCN909fLfcZkhwqVqmb20Ah5LJJS2dSyTYDjk8  
qVVL4Wex6l3LfyQ4YR6Oq6fwt9LkvLvZDgkljE35bpT5UHzz5KjhHgl0+oo3  
L7vgkB/9jRYtWjI8MEXISRYUfm0ZEFWjJ4PjdrvpgjFlfvkw31JmJEoy34PB  
UH0cOvItPEiahQw8eVfG5C/iUASpcU7sAjnSn9+67FQo/Hh5zUT4IBkqL0bL  
9CrgUEOTndzxw2Qlni2V15HAIT7PgpIjR8ige5lGzPEMDiWe+nKYjYsMr/7x  
Gr4+SzkHOZfX6Y6Tof+fxtKV45R5qx1vs8dDBm8R0SdhXDgksvds4C8fGUas  
Itx+HabU5/Ef7Cc/GThTJc81s+HqIqvMo2VBMojfFlZ6cwCHbAXd+OaFyHAY  
zrBKioUyP7/cS58SjgPt2YLWWSYcksN8tj16hgwf035lrzHgUJ7GMbcvomQo  
TFPHX6PHIbptw5FBcTK48wZqsNLhkFttms4bSTJoSAaHC9FS5p1Tx5NOKTJI  
VclL3aTBleUTVClvZcggI5aX4kqxSz6ev9kqSwbLRsKTQop9IM2XsVGeDDV8  
LAvnKf8PUHsYUKNIBsWaH9rnKf7H/szOVCqRYcvyNG0R5X7NR/zGpcpkoOlo  
0fBlxKFH9ubthYgM117qq9Tuw6GjPMRzeUA5b8rJZb0fh6lG39wlqZFh59XU  
XsRBHPqexMiepU4Gu1/FQoco9TLAVKNTNMmgMKJWe5RSz6Zflatx2mSIsnvw  
8Qal3gIP6v+L1CGDdlRfSxY/DqXYLvcH65KBzJuZTS9M0V9HzyA/PTJ4io3H

/hHDIf03Ng89DMgwerPyuasMRf/E5/E4G5Jh3mjU2+Y8Re8pf0y9bkSGfD2b  
zhHAicI66z9LEzJQ+5/88VUbR9nvYoYMzcng++KWb6g5Rb8cadW+YkEGg3CT  
N0x2OCTX96tRy4oMQrqspnQeOMRw3pmsbEuG+PCognMUfVHObnBN2IUMNyrf  
B6/X4BBbd/JLfcymld+eOv1DIeCI19JH/cgw8zh5duKvTiksyTPxuZDBsGt  
YM2cGRxafM375m8wGW5x4TR+8FD09/kwq8FQCt40vFhVRc0Rw8PhlfvhZGiO  
Xjr+WMEc8RNvsFtEU/B20ebYiqE5MrE9ZPYsiQxBTabn1FLMUdsu3VTMDQo+  
5kzSBP6alz2f6374XDJ88u3ibmbAo5GZF/SyeWSQiX+vpsCBR7/7Is7MFJCB  
xojWf0CSsj/l/XHXKiXDMe+Z30ds8aij1XTvRDkFfxtozoWy32vGPM76U0Hp  
D7m+vIQQPLJ29qmreEgG6aNvHWhzKPNRYekPy2MyrAnmHLv/FI+EKnVSphvl  
00B3r62vE49q+CqOP22i409FgsnNd5T5Te+APFrJ8NOFyu74NB7hgtvfajj  
A4MJ5tC7hEezS4I2J9rIsITLdTtC4X/qD99iB15R8ulevOEmTcZWuhIxWsy  
3G1PueLCYoF4WvJLozvJMPER+9gmZf+skPynYN5NiafESJ2Fsm/L38V1y/SS  
AR0TPlxM2XfbjzSZs7whw9lbuN5mQQt0NZlzaaqfDKc91Wr1TlugsW2/8NYB  
MmR8O3cAL0bZd73es5IGKfnLRAt8lbRAf6ekC90/UPBaHS7bL03Zx02zpDU/  
UfB+JyxVQtYCcfQuv+T7QoY0rXeuv+UsUBG68r8AzQIy/VT32ZZAEwaLJCY3  
XD4usqvlz9uWQHyUOGzjN1w+vCUKd6jdlkCg70+ARDhcPkmZaAiB35ZAnmWj  
2Eo4XD7WDMeZWeGWQJpWRen3N1w+ZIALkZLjlkC1FsgoTTdcPvHzg7wK5ZZA  
FP0dDUw2XD5+Z+JN4+aWQNZgOQz2NFw+DNtA37volkAfmQycTDNcPplOn3CU  
6pZAEf2JMIExXD4mwv0BbeyWQM/jo0UFL1w+tDVck0XulkB4pExLaixcPkGp  
uiQe8JZAM5Z2uYEpXD64nwesLfkWQKKrCbPoJVw+MJZUMz30lkCNj0XW8iFc  
PqeMobpM9pZA67xYK6IdXD4eg+5BXPiWQLCucbr4GFw+IXk7yWv6lkDQ376L  
+BNcPgxwiFB7/JZAPstup6MOXD76XCJfmgCXQNu8sN4DA1w+cVNv5qkCl0Dy  
uj8KvfxbPuhJvG25BJdAKVuroSn2Wz7WNlZ82AiXQMt90jEl6Fs+shCKmRyR

lOCYrnW/3shbPikH1yAmE5dAbk5fKWzAWz6g/SOoNRWXQAls2T+9t1s+juq9  
tlQZl0BaDDmTsqVbPmvE8dOSlZdAJlS7uCl/Wz4keFkODzKXQEYwDyfgKVs+  
m26mlR40l0DstDIwnB5bPhJl8xwuNpdAlgBmaDwTWz4AUo0rTTqXQNkK74cx  
/Fo+3SvBSItClODPXaBoJ81aPpbfKIMHU5dAcpMr2QhtWj4N1nUKF1WXQD0l  
M6/7YFo+hMzCkSZXl0BYk5o381RaPnK5XKBFW5dAQ2cYXeg8Wj50k5C9g2OX  
QIBJW469C1o+xYndRJNll0B4nInyRP9ZPjyAKsyiZ5dAjp1r/MHyWT4qbcTa  
wWuXQFokZwat2Vk+oWMRYtFtl0A35w4Jl81ZPhhaXungb5dAftKGtp7AWT6Q  
UKtw8HGXLkEFhAktFk+B0f49/9zl0CKnAMXt6dZPvKkfdw=

"]]},

{RGBColor[0.880722, 0.611041, 0.142051], AbsoluteThickness[1.6], Opacity[1.],  
LineBox[CompressedData["

1:e]wVIXk410sbxiWSKcd0hEQJWZnJlcttixbrjOxjXyqSbWTLbma+VPapSFJC  
JEKYpLQv4rSn70lIC5oISf2+Vz/e670+/zzv9T73c9/PBt8wxwBeHh6eMfL8  
/zb8/vpbuAiPCY/9g6YdgtYmg8c/1H+h95uIOuxUFP2qgKQHMPG19K8mQ2dK  
G1uf6KBn1lCaTV80uf2K6cQ9bolZ7n2LBPpK4MzXRyIStHD6ucooii6Dl1Zz  
vJjb/LHOzZ/nnY0sZLv1fdSoAZDo7xsuy5NDHLPY5Ht0lJSntCoE9m+Elv69  
so7LwbBZ7FN9uVYRS3sjXLYthqAwUcvgeF0dUgX87Li0CJSq95+S99XAfcY3  
esFiBC70M369stkCn82He63pkegrnRgszdOE1X09vuN+UZj4bX6Of78WbLWH  
3/9Sp0P0xoTy87W68Hm6cMw9IxbiEnfe1h7ThcTdQa07n2IhHXyYK5NPD02v  
buvx2MVhk6zFV4MpPFTXbqv7IRYP3aST9WX3DbCzIn3SMCcBbiYWegfpRnDu  
3DN0g5oEDYZK6dYfRigMffWk+nISeHv+4p+JNsZLBU5UI18yamj9z+KjTaDt  
w5Vs8kjGb+PtLRYcIEPaKZ7LnwJ72gtHxzYzL0lZ9+60cSq2pVot0543A9Gy  
qrvALxWbLnDa1hiYQ/pQ8o4xRirmv5bJ9baao6X9yWHJnlSUJ4ZOeLVa4GhE



hMRb5zRMlywjQlt2oDEqR047JR0DN2ON7GZ3YL49zvhoeDoejH6Z0tSzQh+f  
EafjWDPoqz13nr5qhcMxvAVf7qdjR/sZhfir1qjaG7xYoJOBE+/005nNuxCW  
ezVS6E8GUv/URO2f2YVBuVsZ5eKZCJGX3bxHZzcCL4gwRtQzYXqA/7hI8264  
TCqZ+7hn4tPPpx5FTXtw+YSHdeSVTGyX0jB3rtEWvdZBEVcdGLgzEj21c9IW  
u4ItY0X9GNhTk/xxUsUOk6wAIS1RDNAMi95sL7dDck+D9KVCBkwve/fts7ZH  
sKW/2pOXDGSKBb4xDLSHgothDD4w8CjmwAuRdHsc8B/Jjp1mwBH0ruYb9jAO  
GKgyEWXC/2IW+xi9BxhwBXep72aiSie39QXVAdSEiMAhFya+nixqqoxwgOfT  
7ZK0QCbovmrbeoc0DNZTr+WzATj+9WSkwqOcGecTVnZyMTFNSMJW/+m4EN5  
pT1rFQsTsWOH+bQouDP8S1xJkoV/Br5EvbajlCh0oo8tz0L7hdmQxCwKDIII  
2kzrsfBEb6XnQ14qJldWrbhAY0G0RNS1RI4Kc85v8fEgFvbyrHUKM6bCPqRh  
gjechYEHG23WxFHhQG/paU9IYcpV38jnGxUmK268o55nQbvDyEBbxAmjfnIK  
brUsxG401xFQd0Jj2uAxgyYWeD/bqF8KdsKhgaQA5m0WxBL8ZOYHnVCSkHk0  
flgF3djjiznde7FzUf/XAzECNeVc7e7Pe/FH6pNPqiQBucq9IUKCzmBc6lKT  
kSUGVL/+XYa5M+48WmE5p0xgqLOuNa7VGYkHb960MSbgdE90quWIM7aYlKdJ  
mxN49IiuNMN1hnDsrN4TKwLNz42LwtRd8P5Jxol+ewLEh+5I/3IX7E6b2crx  
IfBnXKvm7A0XFG/Sjb0cQCBqomhkoM8FdnGLc8Q+Al6zNAdXCVckfqy+O3OI  
gLbgpIZttit6uxjh5UcIVK+kBGZVu+JxlarV0xQC60VbTj+454rAiJLDH9MJ  
CEonCZsvccPasdrxfwkCA2oin/TobuDh5R3KKSRA2Rq5ITrfDY9+ZIQjniDw  
QOe1y5V6N5itCLIPOUWg0fjMfbXPbrhVsXwJt5TAZvOlf/Ytd8fISGubNWCj  
lFoF6VYquGPmwKoB+XMEmpZbKjZ4u2NQ8Pn5pZUEFqn5fbREd9hzana8rCIQ  
4TorVnLKHZbLOXz5Fwl4+t5IFX/pDuc81UvPLxF4FijPoXDdgd7gpc6XCVgf  
YHzLEfGA5fPjNvfrCWhF2XkL7fKA6Q/bwrBGApWHG9nWQR7gVen8XdIEYF2i  
RE9GugfiFJ/+091MIC8lftntsx7I7t6/f+QqAYHMQSOeGx6Q+YhXoy0EEgjz

aKM+D3ia6V542UqAe6yyNm7eAx84Ncub2wgE5QuNtoh7Ys8WXrU0DoE+dpj0  
zD+eUE08ZYxrBBxKnjtqOXhCKvXlwS8k3yvTl8lOeqJB+u/PjHYChhXFnbVZ  
nmAotQyLXifQUP1nbrzKE7ppsilHSVas89NUuucJqnDd7CzJJVfuB/m/90R8  
2e1Iwx4Cq1tUz5zlocFUplP+NMmZ146/GpChAd4Cum9InlyliS8yoiHP7Mzr  
ZTcluBh6y9l60iDfFE3Ik9yZYH2XP5GGlGnvda2SVa5r7r9eQkPl+d1zSiTn  
L64ViW6nwUF8veRfJP8yWtKk1kfd9uKbkMnk/cAj4y6jCzTIZUirXyK5p+Pp  
YrG0F64rSGT6kqz/p62cst0L3d3Fzglkl5uUWwm5e2HVs9wXxeR/hJKJL7fi  
vGCQMrxFjuSomxG5cae8IKwRWWJA9qefx11Xi+MFM5UtNvNk/3aYmr8b7/UC  
+/5ilC3JwsOsvFphb/Dviv/+iNQDS377M9d5Y5lqWCWX1Ct6Q4Sev5o3tn8J  
OiZE8oCPW5/0Hm90Shw5v5rUWyy1u27W3RsOmYqqf8j5sC43S3l+wBsF/eP5  
A+T8NIyoKGZleaPe9jUnsoHAf7xn5gKlvfEwJptfZXLepOTFHpvVejM5EhHz  
rI5Aut9C2M9H3rhGH1P6VUNg7+jjtn0rfHdfLry6uYL0Nx+yLaV8kHh34h3f  
eQI3NjXRNqj44PGyr0NW5aR/AkqW9u70AVf721w16aeFDyE21iwfsAyyHxkp  
IqC5bFh200kfaAr/5/uigIC/ohP3T5UPWm6d3HEtj0B3oBG75YEPGqcHTwYf  
I1A2tnJYcbkvYo/2/LLIIPBCILWRd60vVg9uTB9Jf2/+UfGgJlv1r75tZqe  
TPoveEClyMoXoW0Vt5LiCVi010XxM3xRt0tnyYZwAp8+2S0f5ffDt5Zx22Y3  
Uo/p8c/1f/vhYlfs3mlnUt/Ftj5EeT9oXvptpeZEwP2v1iIJUz9U35TYwbAj  
0KUjp7A7wQ/1Q8vWfiHzsC55yvQK1w+vk9QYqark++K58cmD/tidLyYe9IOF  
blVL5sJf+Tqq9WNc1lQUb5rJrXoT+ZHcWbQJAvvt88LNkkF4L61r77TRxao  
Pj4nxpwCwPkho/2zl8zz2q3Ntl0BSOb1EltpZ+Gn6bOJdW2B40qV3is+woL9  
Pg1BpYeB6LG7KrgnjoULOYT81t5AFH58UjMXzQJl0MzFcj4Q1NqLZlahLNQm  
NHaGGgSB8/G91jV3FmgtBQUdbUEIGRR+IqjPwi01523enGBUDCxcKJpggpDo  
yzh3bT8YClVjF52Y0PnexgyvOYgXNGZ80HoGAoRZnzpVw/F1mD/71ElGuZfm

PoYrRyJn08U++0E6wl4qCFvwR+OCso6xbXMaEnoMP7S9puOa3acvzMZUPGSy  
i149PYxv0tS61uoUrAi6HLLmYhzsltfvlzqSkcUnJL1QnYCKkcj03aeSIFVh  
n5RedgQ0drgl420ibJuV+U5sS0b1vJedhl0CLs92aXfqp2CTQoVlcFsciK7u  
mAWFVMjEVZopU2LBn8JVFFRKQ8zfVV1SozEQ0BNqCJZPh0PHtmzucTrSkJt  
eldlwKL8h1a9XzTOVERvlVmVCcVv3KqbW6Kg4ysWHvErExzDHJUPspFwXM8T  
JPkfA58eHkszl4+ACGfVw/z3TKwb2p30STYcOz7GG8n+y8Jp8TdLf247BJkf  
K9Yf+Zf0WYJ3T1XZQcTzH+/V6MpCkdzzzW1fQ0CpDK+cupoNC60+qmehB/B4  
M304o/ko6BtmRmfe700HYa+62rljMLBR/G7KDlae41anTdnHcdVCWUrGMghV  
55ymYyxycNpPIAHzAYgYM7UK5ORAY4X9B7sX/hCWNrE33pYLOQ/Ds90VfnjP  
PjBS2pAL2yMm7x+U+uJloahvIWleUnT39PqQvhxPfcQursjDRun03YlkTuS2  
NeyVWJcPx3jhfQknvCA4VP04oSQfue3T/HPdnrBgrNPIkipAjXlB3ryiB9pj  
OiQ35hRgoYxnaxu5d/lcwq+VixQiYWHmUa+mK1gpIP9qMgvhVZ+VN9PvjGeq  
9b89Fwoxo2i2wH9uLz7flXkyH1uEfX5G3y96OcG0mrNp/VQRKs3ePt1mRkXr  
GYFadW4Rum6+a/A1okKziPqP0XQRIjQDOFn6VKxPmzD1mCsCQ2befFiDip8e  
G7108bCx50bG1lPSVFz5izgpvpoNTowugfkMBZsOu64S0WIje4002KFqCooP  
Xihcr83GJYZoYvt5CkQDvq/T0GVDovrdshVIFPA4HIW12cYGv3PX4aoiCvpV  
062zzNh4PMno5qZRUDS4OU2AwkbCyRC+6zQKVr6KXiHhxMbn4Be7pN0oS0+6  
lavozAbjzZXaOCcKIto8yizd2bCrv95pulcC2/yc62l+bCz/1aHcbUDBXVa/  
RX4AG1G08RY6OhQYJqt0IQexkFP1xOHTmhSohN5523mAjbcDU6rhShSc9Vvt  
+zSUDWZN5cW+jRSsdaOND4WxMVrdarpzPQU59jWHpsLZUF8zMnVVkgIBq7nZ  
P5FsVG0eaVFYQ8H/AGwfbg=

"}],

{RGBColor[0.560181, 0.691569, 0.194885], AbsoluteThickness[1.6], Opacity[1.],  
LineBox[CompressedData["

1:eJwVx3c8lYsDx/GTSxpCi2McbJbJqHSQ+XzV+UnDyOoSqEyo+uUEFWKc2T  
EnKMR2Sk1KFb6VYaSoSyR5IyL5Iy7vX74/P6vN4bnH0sXfloNFrwYv+//uSH  
f3xFaASNpiDVptZk0B3/uWyY3Um0+O/zltCLi0JeME4Xs0eI8w0j8kOMEiLS  
pd/4H/o0UXLbxbm85zFR369jHcueJ8pTE2xr+98QnNu1ZWvd+TD9ZX5nHusD  
Uernp91LX4oPT8oLZ8p6iPcajIcltctRkvpFMClngPgxUcsKYq8C6ewTl/Hn  
CHHZjvc5N0kUv1zvFO9PmiCyeMKFK93XQKIq4An/x2miXMLF089oHWamQzfq  
xMwSfwfwrTSxbAryGO6zYqG5lhbSWjCHKoPU77liv+GLzoulfm1EqjkkG29  
Ikux8pewwZ9sBt55DfjYXhOCtL0Lrd1UFn00TncqxEQh3tnRm53003a8MIB7  
M7MaygYaeYLuctgfE2IvKigGjZGOpdU28sgQtJAp1qBD73rkCW8jBZzwwP9D  
ny0J0/kOIWa6EvrGI9TJs2RheyvychT/RvSdq2b8HPgdhx01xvTGN6Lr6zMh  
S205+P4VeTunVhnz2Wsn3v9UQGqwhs4pthqW5Fm4R/OpIFot86q8szoeovmj  
Z5Yq8jsj51pMt2DDr6Z9Ncbq6Mgc7c5M2or7HLPWDW1bMbqwiyygroHvz3wq  
ysOZmLCVs07u1oClnQgf65wmfpSM8vNstqM4ZE4z3V8LtMPpbbp5GTHQtuHlZ  
nduBNY9Gld/TteDXbn4ktEofYuJP24rjtOAp4hub22wAKZ90TgS/NgKE4gRl  
vxtCQZY1ojOuDc36BVffbEARJL0su1YHwss23pMR2AV7gqXtzTaAgBf9ZZOq  
CdQjN2dumzaAX8ZkZ/ugCfjqRQW++xsiXVdTfiF/D4qcOhsD/Qmcp5s5nVXe  
hwVDvXusKiDm4iQRZmwGC6cmS0veTlQyRRsyvSwxlbE0xuueMW4t4Y8py7FD  
1+MAA/MfxtgrOXXkoLQ9XvQPj2/V3o3SLtu7t9LscV31/cGpyt2Qkm4W0Hz5  
ElwfZCkGVprAh33CMCHMEVfad9RE3d0LzvnEYcazi9CT9JjhVpjBPYHPegXN  
FU/7/Mf3jkkhpXSLsKSRK/YXhQ6ObTZH6JT+33ZhrnDST/uol2M01r8TF9wE  
3GBUeqTjplkFeJduruKuOg6XBs6DjdoHsN2D4ogpncTN9X1B29ZZQSelKKbK  
zwtamXHzCW9t8cm9X4q15TQiquNbhuh0ajjd8+K1QRC+fTNf1i9wDCy5Cf50  
oXD8Mmoclea54eJmVFBxVCRixDsucavdES88Jvtyeyw0J3lRvkXeeMtdK3/E

JAGuQtHfalR8cbR170IP7SSc6poZ9FU+jcLZ4dXOzBT4NCsKsQT8EeegaWQ4  
nYqgev3PvA9seFqnySRdlfEyikxraTiLqAs/E1nG6Vh xvNRz/c1z6DM805pb  
cxUc/pVSs4VBOPSoI/aacQYk8yxCLmafH8QSPbp86XWY3VXmv6IbCtXI+WqH  
kUyU/qhj1uy4AF27nhvTEtmIqXt7ZlYxDBEV34KlBmZD4MKE0vKN4Tjlnan6  
yuAGBLVXlp+QvwirVgH7vOc3EB4SZtoqfAmDLPZjPyIHWQVStgzhCijNPK+1  
rc6BpvNaX7+5CKhf8vSu3MSFpQztuMRAJHrUA0Xs47gQqRj+mfwpcmp9jm7l  
01wYDwYayL6LRpOMzIc6y1wwplfnH8XA/d7LxnM8lwECsS3qtdxsLBCdvXt  
ZXmwKvAtGK+MhXsDt3HIJg+vN7F7L929D0tODVIpLw8P9VvVVLlxmAq4s5s+  
lAdty202CrHx2Bk8BgnVfFBcm6kzrATwe9ertHvnm++L0W63qgS4CyrCf1GY  
DyEpwsJQNxGM+gYmcyAfn0iPvszyRDQqMh9wpApwPnWNM6WUhJYsm0fSpgX4  
GvaKvJaXhKPB1+ZnQwqQyCu3FZdORqJoblR/cQGW9xS+DspIhkOo49hgWwFY  
kdLqHMkU7M2pUI4ToPDgzEMJuYQUpLwyuqKhQoH/D9/qHJFUTKmN1rw9QCH6  
gtVAUUQqdCND7/efptCoUrbg0JuKluHajsRkCkPPGG9+BqRBpy+8TvwOBaPC  
KgWZ8TQ0jVIn37jycD9LsFhtlg0nrNYq7m2gsDXNervBVBrqA24+eb5omfBR  
I4eZNCiIBeY+aqTwy0Hu8FUaiYT3J38ra6JwWzQmXWw1Cf00LCbnIwWfs3bC  
lhok2H3BqSo9FK5556fKME n8PLY+N3fRa1wnpdW1SNBmeKmMXgo0y8sqprok  
So4ay4n0UehUqTHh7CShHLA1d/wThbTuTeGCViQCVT3nSr5QWNXiv0LchkQj  
vwyhNEjhYt2TRKWDJjBstV2vL9qP55D9v0MkKvoMHThfKZglj/wVfoxExITq  
d9chCs+i01nJriSckiOsOxatH7q5Luc4CaxLji2HKWz2etpW40FiRKX7heEI  
hRvHVjs3eJG40q9y786i6fZOx3t8SEgoGkdvHqWQYFF0atyXRDvBJLIXLbh7  
5se/p0kcGjr7uH6Mwn/+JaKn

"}}}}}

AspectRatio->0.6180339887498948,

Axes->{True, True},  
AxesLabel->{None, None},  
AxesOrigin->{0, 0},  
DisplayFunction->Identity,  
Frame->{{False, False}, {False, False}},  
FrameLabel->{{None, None}, {None, None}},  
FrameTicks->{{Automatic, Automatic}, {Automatic, Automatic}},  
GridLines->{None, None},  
GridLinesStyle->Directive[GrayLevel[0.5, 0.4]],  
Method->{},  
PlotRange->{{0, 1649.98045}, {0, 3462.678585}},  
PlotRangeClipping->True,  
PlotRangePadding->{{Scaled[0.02], Scaled[0.02]}, {Scaled[0.02], Scaled[0.05]}},  
Ticks->{Automatic, Automatic}] \) \!\(\\*

GraphicsBox[{{},  
{RGBColor[0.368417, 0.506779, 0.709798], PointSize[0.6], AbsoluteThickness[1.6],  
EdgeForm[{{GrayLevel[0], Opacity[0.3]}]},  
{RGBColor[0.368417, 0.506779, 0.709798], PointSize[0.6], AbsoluteThickness[1.6],  
EdgeForm[{{GrayLevel[0], Opacity[0.3]}], PointBox[NCache[{{Scaled[{{Rational[1, 2],  
Rational[1, 2]}]}, {Scaled[{{0.5, 0.5}}]}]}]}},  
AspectRatio->Full,  
BaselinePosition->(Scaled[0.1] -> Baseline),  
ImagePadding->Automatic,  
ImageSize->{10, 10},

PlotRangePadding->None)\) blood

\!\(\\*

GraphicsBox[{{,

{RGBColor[0.880722, 0.611041, 0.142051], PointSize[0.6], AbsoluteThickness[1.6], EdgeForm[{GrayLevel[0], Opacity[0.3]}]},

{RGBColor[0.880722, 0.611041, 0.142051], PointSize[0.6], AbsoluteThickness[1.6], EdgeForm[{GrayLevel[0], Opacity[0.3]}], PointBox[NCache[{Scaled[{Rational[1, 2], Rational[1, 2]}]}, {Scaled[{0.5, 0.5}]}]}]}],

AspectRatio->Full,

BaselinePosition->(Scaled[0.1] -> Baseline),

ImagePadding->Automatic,

ImageSize->{10, 10},

PlotRangePadding->None)\) liver

\!\(\\*

GraphicsBox[{{,

{RGBColor[0.560181, 0.691569, 0.194885], PointSize[0.6], AbsoluteThickness[1.6], EdgeForm[{GrayLevel[0], Opacity[0.3]}]},

{RGBColor[0.560181, 0.691569, 0.194885], PointSize[0.6], AbsoluteThickness[1.6], EdgeForm[{GrayLevel[0], Opacity[0.3]}], PointBox[NCache[{Scaled[{Rational[1, 2], Rational[1, 2]}]}, {Scaled[{0.5, 0.5}]}]}]}],

AspectRatio->Full,

BaselinePosition->(Scaled[0.1] -> Baseline),

ImagePadding->Automatic,

ImageSize->{10, 10},

PlotRangePadding->None)\) gi

```
(*-----  
-----  
-----next mouse*)
```

```
vn=readTac["C:\\Users\\exx\\Downloads\\pAM6, Liver 1.6005, GI 0.596, ID  
4329.csv"];
```

```
Lv=1.6005;
```

```
Gv=0.596;
```

```
id=4329;
```

```
vn[[1]][[1]]
```

```
{{10,200.505},{30,713.799},{50,583.058},{70,467.553},{90,348.457},{110,248.125},  
{130,213.779},{150,173.547},{170,140.422},{190,121.334},{210,112.007},{230,98.9  
358},{250,94.0477},{270,86.3427},{290,82.2237},{330,73.5494},{390,58.1039},{45  
0,50.027},{510,44.5687},{570,40.2488},{750,31.5647},{1050,20.6069},{1350,14.38  
64},{1650.03,11.0011}}
```

```
model= mouseModel[Lv,Gv,id,30]
```

```
ParametricFunction[\\(\(*
```

```
GraphicsBox[RasterBox[{{179, 179, 179, 179, 179, 179, 179, 179, 179, 179, 179,  
179}, {179, 180, 180, 180, 179, 179, 179, 179, 179, 179, 179}, {179, 179, 180,  
179, 179, 248, 248, 178, 179, 179, 179, 179}, {179, 179, 180, 179, 179, 253, 248,  
179, 179, 179, 179, 179}, {179, 179, 179, 179, 179, 248, 248, 179, 179, 179, 179,  
179}, {179, 179, 248, 248, 248, 248, 248, 248, 248, 179, 179}, {179, 179, 248,  
248, 248, 248, 248, 248, 248, 179, 179}, {179, 179, 179, 179, 179, 248, 248,  
179, 179, 179, 179, 179}, {179, 180, 179, 179, 179, 252, 248, 179, 178, 179, 180,  
179}, {179, 180, 180, 179, 179, 248, 248, 179, 180, 180, 180, 179}, {179, 179, 179,  
179, 179, 179, 179, 179, 179, 179}, {179, 179, 179, 179, 179, 179, 179,  
179, 179, 179, 179, 179}}, {{0, 0}, {12, 12}}, {0, 255},
```



ColorFunction->GrayLevel],

BaselinePosition->Bottom,

ImageSize->{12, 12},

PlotRange->{{0, 12}, {0, 12}}\)\ \!\(\^\*

GraphicsBox[{{}, {}],

```
{GrayLevel[0.55], AbsoluteThickness[1.5], Opacity[1.],  
LineBox[{{9.09090909090909*^-8, 9.090909090884856*^-8},  
{0.0874367476365131, 0.08197166587636243}, {0.18222810297558026`,  
0.1358255024317191}, {0.27073779576926765`, 0.13315455086535802`},  
{0.3575112797365835, 0.08143316377978886}, {0.4516394623155443, -  
0.007347854733426912}, {0.5394859823491253, -0.08816932746972758},  
{0.6346872009943513, -0.13787329990112937`}, {0.7281522108132057, -  
0.12816574147938434`}, {0.8153355580866803, -0.07001063326902106},  
{0.9098736039718, 0.02121659675083076}, {0.9999999090909091,  
0.10024804094746914`}}}],
```

```
{GrayLevel[0.55], AbsoluteThickness[1.5], Opacity[1.],  
LineBox[{{9.09090909090909*^-8, 9.090909090880112*^-8},  
{0.0874367476365131, 0.08090369567458766}, {0.18222810297558026`,  
0.12746559200130417`}, {0.27073779576926765`, 0.1116266937044405},  
{0.3575112797365835, 0.046963725126600256`}, {0.4516394623155443, -  
0.04509050859182233}, {0.5394859823491253, -0.11115559892361665`},  
{0.6346872009943513, -0.12642564594664163`}, {0.7281522108132057, -  
0.07740196037964171}, {0.8153355580866803, 0.004179083230780074},  
{0.9098736039718, 0.08937493944143977}, {0.9999999090909091,  
0.12834702174618903`}}}],
```

```
{GrayLevel[0.55], AbsoluteThickness[1.5], Opacity[1.],  
LineBox[{{9.09090909090909*^-8, 9.090909090875369*^-8},  
{0.0874367476365131, 0.07984396759533968}, {0.18222810297558026`,  
0.11939549826670079`}, {0.27073779576926765`, 0.09184904274707059},  
{0.3575112797365835, 0.017913117173780694`}, {0.4516394623155443, -  
0.07109962300031061}, {0.5394859823491253, -0.11717052830989395`},  
{0.6346872009943513, -0.09879571259704382}, {0.7281522108132057, -  
0.022693471356141894`}, {0.8153355580866803, 0.06128703302641453},  
{0.9098736039718, 0.11605625481609519`}, {0.9999999090909091,  
0.10415981267620744`}}}],
```

```
{GrayLevel[0.55], AbsoluteThickness[1.5], Opacity[1.],  
LineBox[{{9.09090909090909*^-8, 9.090909090870287*^-8},  
{0.0874367476365131, 0.07879243663407876}, {0.18222810297558026`,
```

0.1116081822210312}, {0.27073779576926765`, 0.07372482040530459},  
{0.3575112797365835, -0.006267252216927747}, {0.4516394623155443, -  
0.08743897872291118}, {0.5394859823491253, -0.11109134853087661`},  
{0.6346872009943513, -0.06371549528296311}, {0.7281522108132057,  
0.02544576624054603}, {0.8153355580866803, 0.09464282937855747},  
{0.9098736039718, 0.10731931496853601`}, {0.9999999090909091,  
0.0516787429232188}}}],

{GrayLevel[0.55], AbsoluteThickness[1.5], Opacity[1.],  
LineBox[{{9.09090909090909\*^-8, 9.090909090865543\*^-8},  
{0.0874367476365131, 0.07774905743802465}, {0.18222810297558026`,  
0.10409673959866513`}, {0.27073779576926765`, 0.05716133039337165},  
{0.3575112797365835, -0.026084496726167965`}, {0.4516394623155443, -  
0.09591154799603378}, {0.5394859823491253, -0.09685594593277226},  
{0.6346872009943513, -0.02730376120671303}, {0.7281522108132057,  
0.061646715198529656`}, {0.8153355580866803, 0.1046634148537508},  
{0.9098736039718, 0.07509702498429204}, {0.9999999090909091, -  
0.006536873471333553}}}],

{GrayLevel[0.55], AbsoluteThickness[1.5], Opacity[1.],  
LineBox[{{9.09090909090909\*^-8, 9.0909090908608\*^-8},  
{0.0874367476365131, 0.07671378556951527}, {0.18222810297558026`,  
0.09685439581479163}, {0.27073779576926765`, 0.042069810325321415`},  
{0.3575112797365835, -0.042006785469922474`}, {0.4516394623155443, -  
0.09808544986431629}, {0.5394859823491253, -0.07760167026270944},  
{0.6346872009943513, 0.0063643674428021085`}, {0.7281522108132057,  
0.08405712128907425}, {0.8153355580866803, 0.09555213349985489},  
{0.9098736039718, 0.03202960165577907}, {0.9999999090909091, -  
0.054402034659985464`}}}],

AspectRatio->1,

Axes->{False, False},

AxesLabel->{None, None},

AxesOrigin->{0, 0},

Background->GrayLevel[0.93],

BaseStyle->{FontFamily -> "Arial"},

DisplayFunction->Identity,

Frame->{{True, True}, {True, True}},

```

FrameLabel->{{None, None}, {None, None}},
FrameStyle->Directive[Thickness[Tiny], GrayLevel[0.7]],
FrameTicks->{{None, None}, {None, None}},
GridLines->{None, None},
GridLinesStyle->Directive[GrayLevel[0.5, 0.4]],
ImageSize->{Automatic, 28.4375},
LabelStyle->{FontFamily -> "Arial"},
Method->{"ScalingFunctions" -> None},
PlotRange->{All, All},
PlotRangeClipping->True,
PlotRangePadding->{Automatic, Automatic},
Ticks->{Automatic, Automatic}] \) Expression: {Bl,Li,G}
Parameters: {k1,k2,k3,k4,k5,k6}

```

]

```

Manipulate[Show[ListPlot[vn[[1]],PlotRange->Full,PlotLegends-
->{"blood","liver","gi"}],Plot[Through[model[k1,k2,k3,k4,k5,k6][t]],{t,0,1500},PlotRa
nge->Full,PlotLegends-
->{"Blood","Liver","Gi"}]],{k1,0.001`0.2`},{k2,0.0001`0.1`},{k3,1.`*^-
6,0.01`},{k4,0.001`0.2`},{k5,0.0001`0.01`},{k6,0.0001,0.01}]

```

```

Manipulate[Show[ListPlot[vn[[1]], PlotRange -> Full,
PlotLegends -> {"blood", "liver", "gi"}],
Plot[Through[model[k1, k2, k3, k4, k5, k6][t]], {t, 0, 1500},

```

```

PlotRange -> Full, PlotLegends -> {"Blood", "Liver", "Gi"}],

{k1, 0.001, 0.2}, {k2, 0.0001, 0.1}, {k3, 1.*^-6, 0.01}, {k4, 0.001, 0.2},

{k5, 0.0001, 0.01}, {k6, 0.0001, 0.01}]

Clear[newmodel]

newmodel[k1_,k2_,k3_,k4_,k5_,k6_][i_,t_]:=Through[model[k1,k2,k3,k4,k5,k6][t],List
][[i]]/;And@@NumericQ/@{k1,k2,k3,k4,k5,k6,i,t};

fit2=NonlinearModelFit[vn[[2]},{newmodel[k1,k2,k3,k4,k5,k6][i,t],{k1>=0},{k2>0},{
k3>=0},{k4>=0},{k5>=0},{k6>=0}},{k1,0.008`},{k2,0.0001`},{k3,0.0014`},{k4,0.001`
},{k5,0.008`},{k6,0.0001`},{i,t}]

NonlinearModelFit::eit: The algorithm does not converge to the tolerance of
4.806217383937354*^-6 in 500 iterations. The best estimated solution, with
feasibility residual, KKT residual, or complementary residual of {1.71504*10^-
11,5.06631*10^-6,4.32698*10^-12}, is returned. >>

FittedModel[newmodel[0.00471859,5.86338*10^-
13,<<22>>,<<23>>,0.00661849,5.86338*10^-13][i,t]]

{fit2["AdjustedRSquared"],fit2["AIC"]}

FittedModel::constr: The property values {AIC} assume an unconstrained model.
The results for these properties may not be valid, particularly if the fitted
parameters are near a constraint boundary. >>

{0.935647,976.619}

fit2["ParameterTable"]

FittedModel::constr: The property values {ParameterTable} assume an
unconstrained model. The results for these properties may not be valid, particularly
if the fitted parameters are near a constraint boundary. >>

      Estimate      Standard Error      t-Statistic      P-Value

k1      0.00471859      0.000626701      7.52926      1.84204*10^-10

k2      5.86338*10^-13      0.000660231      8.8808*10^-10      1

k3      0.00148074      0.000242692      6.10136.18349*10^-8

k4      5.86338*10^-13      0.000192888      3.03979*10^-9      1

```

k5 0.00661849 0.00103711 6.38172.00417\*10^-8  
k6 5.86338\*10^-13 0.00019899 2.94658\*10^-9 1

```
Show[ListPlot[vn[[1]],PlotRange->Full,PlotLegends-  
>{"blood","liver","gi"}],Plot[{fit2[1,t],fit2[2,t],fit2[3,t]},{t,0,1501},PlotRange->Full]  
]
```

\\(\^\*

GraphicsBox[{{}, {}],

{RGBColor[0.368417, 0.506779, 0.709798], PointSize[0.016666666666666666`],  
AbsoluteThickness[1.6], PointBox[CompressedData["

1:e]xTTMoPSmViYGCQAGIQDQEqDhNmblikLZDpAOHbOaw3LlmU7NcG5Xs6OBse  
nlBm0QThNwQ6ODY9On7DohbKD304eHPHloDjpVB+tMOzx/XT/zHnQ/gOCQ4M  
Zkc7Xu7IgvAPJDn8Opm0pmFjKlQ+1WFPv0dDfW8iVD7dwVBDTyk1NA4qn+Xw  
4VFEUQFDDFQ+x8El51PPk90RUPi8h/tnlD7zNlDd+A8KHly+78x/PzUUwlco  
chB6XVsR0BcC4S8ocZiykHOGZnIQhJ9Q4fChf/pOH15fqPoaB4ZlE0JKmD2h  
5tU7MHf705/xcIPwLzQ6PH26l+e6vAuEX9DuMFPpZUb/BHsIP2OCQ014/qz4  
2SYQvsRUh5bfN/pvHdVx8Ls4MUBuxEwHfQ3Zbz0Mag4ATIZ2Dw==

"]}],

{RGBColor[0.880722, 0.611041, 0.142051], PointSize[0.016666666666666666`],  
AbsoluteThickness[1.6], PointBox[CompressedData["

1:e]xTTMoPSmViYGCQAGIQDQEqDl/dBKlTvvg6QPh2Di97PU2TpuD+Z40Mztr  
YxVfF0D4DYEOP7/cmNb4vBjKD3OorZim0NxRDuVH0wSqvxj7XV0P4TskOCSe  
3PB0QlIThH8gyWGq3PQm/ppmqHyqw+y008yHbkP5B9IdupfLZX7Y2gKVz3Lo

m8XlI7S3FSqf4xBYa7j0/+E2qHy+g0qpj3pzeTuE/6DAIcZ/3ysm+Q4IX6HI  
wb07zz7GDspfuOLAts5mEs9fqPqECgf5n/esZhVDzVOocXj3v+N02TGo/Q/q  
HXaK/LI9KxDqvguNDvKx254LC0L9U9Du8Mkle8GUiFoIP20Cwzvne0Wid0og  
fImpDg8svUQC/uc7+F2cGCN3YqZDb+v1J/dZsxwA1Pl5qA==

"}],

{RGBColor[0.560181, 0.691569, 0.194885], PointSize[0.016666666666666666`],  
AbsoluteThickness[1.6], PointBox[CompressedData["

1:e]xTTMoPSmViYGCQAGIQDQEqDhkcx3Wqr3E6QPh2Di8X1cxfOD8j0dHGao  
epcfi4bwGwId5q49KxDxPxHKD3OwfbTQck9DGpQf7ZDQuvT0m33ZEL5DgsPi  
DP03u54VQPgHkhyiDp7680+yFCqf6hCdy9+T61o]lU93MK7cadf0swoqn+Vw  
p9HqqWBnNVQ+x2FqkvjD+Y1UPI8h/0Zry6wbKiF8B8UOLTULYsT96yD8BWK  
HCoSGB4qFzZA+AtKHPj0Zlv7Elog/IQKh0g13vrv+7uh6msc9mwwjd45eSLU  
vHoHyfWVoewPpkD4FxodNFy1vzPNnw7hF7Q7xH1tqKy4PA/Cz5jgwLh0odvH  
c4shfImpDoFfDhyPaF/m4HdxYozciZkOm9Ubz560XuEAAAiveMA=

"}], {}, {}, {}, {},

{RGBColor[0.368417, 0.506779, 0.709798], AbsoluteThickness[1.6], Opacity[1.],  
LineBox[CompressedData["

1:e]wVV3c0Fu4XJ9kyi8ysyMqe4bm2qMgOySZk7733eL2v91X4IihMpKVbJII  
JWSFiBQhlNKv3z/PPfd87n30Hed87r089l5GTieIiljM/z3/l8q777/70BGh  
7Qd3/Xpv58JC1qcnm4FzqLMhWihbLxeiBjn9qgO/Iptu5JckkgujK4om6YF/  
kHbP0crWVwIc7AxohgeeguhpRs1KfwJQ/6JV8Q/kBI4f+9v4FDzgI6QUvQPF  
ACtGHbcwioNCsbk8PvuL0D3R8zz4KQ7K55J+T14VB498b0HZfBzMFn5bKMRK  
wOrzLy+ZXXDw7VijlNRNckq8uFSDiXDA+OKb0MRZOQj+syCRrogFS6Qp7xmo  
As+Nnyr092DgYp]woeS+CqhkWI3]qsLAIvF60h8BqtDzitYyDIeBKpu58bAA

BGy3U3LbHDBwrHrpmWYrwIqABP17UgwY2rw1MmpRh21i5rai4kzYKyBLvfNM  
GyhJH9oS/UqD+c4QFYMDbZjulnqdO5YGgyub2xLyOtDEQou5/SgN/hOdMN9r  
0gHND62vWm+kgXZ70fmwJl1IPyWkQf08Fe5+UOhKfqoH5HFZIZyZKXCJzf2w  
tOEa1B2m4D6aj0HvUsD25a1rweQ2V+yokARXqql/bwkbwA2B7/yMrElgo0yY  
ulRiAL1D1A1fZhJBrdZ29rauIWDG3o5jbRPBcSytnVj+OlCbekRF+yVA5Zml  
cMnTxvCitO22fVMcfAtZCz4pZQyeByHar/LjQHp+0/+9gTFoBMv8NY+Jg/by  
A4+INGPoPpjQnb0SB6/lT918ecIE2ivl2NI+xcL2DQUVU+8mkG/Sed+CMxbk  
CjP/YEbMgFRvPjywLBqqSnZkRr6YQSe5YLZvVjRwPzTzoKY0h57X7q1pIdFA  
/YTrQ4KGOaiwyLadvhYNi101zaHN5hABT4iPtqMg9d0In2OJBUSenVo/XRYJ  
86J0G/KBlkDjftXSDYcjCX9eAJwlqCrsFz2gS4cBmXfW9Q/sQTRX36FHRth  
0KBaNCd6xRKOd2wyWe6HQbKheBmPrRXwOdbeo6UPAyl/A1tqPWvoiJtfnNkP  
gcS2rMl5ThuQYai5qbQaBFtHQWEEFRvYNhsf3OkJAgtlW+5rN22AOeq0w+z9  
IBB+LuH2vMAG2ud0mdRtgmC0Y+xPPvst0C4fWTWYDgSajynYahpbWN6RiVcc  
CgCzlVctt6ns4H7WHon3gR+knoR0LTY7+KNLUjY84wcv+BtteITt4FCfw8Go  
ww8uOBWQTF+2A860j3pTCX5w9Mnjqm6KHfCrbpgPMPtB8dqpjwIU9pC82bB8  
jHxhY8OAYoXUAUod8keMarxBe2/9y5PTDvAoVLLmT643lPyJG43gc4C75YvB  
/TheYEXfTGBRc4CDgg7hOlNvGjblPq8f7gDqmqN/hv94QU30ttr9jgPYBjDI  
Wz32BF/m7LDoBUewmZVhspH1gJfZlreufnME2/WUC3l0HiAs1KfO9scR+rKe  
vqbYcflSsz8pG9mcQJhkqSq8yB1M7Ozurpk6ATlx3mETjTvIVUs+vTbsBAsv  
7vcrb9+GX2rj3zhanOG+SMLS4rQLGN6+SCn40hmwrvtLOs9coByTyic57Qx9  
PBiyzkuYLygbqH10xns7yXHVBi6QHV4Q9cdRRcoGP6EjR9yBptnOTkdLS4g  
MSyQLTfgBN2i5kq2ra5Q2t7/6/GSA5w1aTBxG3lF+8rly+/6HMAzjM7Lf8YV  
iguvuwk8cgD2oYHS5F+uYFG3qqDI7QD+Lgqn6pRuwxGXbZcnkQMILlAuErfd

hq+nP/GiC/aQyjKbUNrmBngHWSqtHFv4mbn23P6VG4jeSuapCLcFV7LdHzwf  
3IDhnsGCqJmTaP2gdC7+5QYqhc+weXK2QDQhr/2fojtUE2q9SZpuQUAmjiz3  
mTtMyhjsVRnbgC2pflJqgwdIbEU0P2m3gpFwsxeXezyA7ja+XxxvBSp7dgcU  
Ex4gyMR3fu2OFbAtB7sk7XhAXPJ7zJ9zVvCus1wnXvIO7G/wGnQmWoJe+AmK  
yNo7E00humZmcwNkd1uSfao8gQdPwt4lbQ7Dxl/GeFo9oYjxydTmaXOwb+Rg  
Hx/0hMxn29lq+2aQGRD1WGrVE0h06s44tZjB5wPN8V1uL7AX7JHPVDODvN+j  
7IEELzh776eh4g1TICLxM38O3mDi1Sqe98AY9Buow8/oes09ZfKi6FRjIDg8  
KL5j4A0Jml6tKd7GINr7bp3Txhv2jIKkSVSM4UaCQnhkmDesUSxsZLw3gnry  
42LU5A00RjVXZhmNwIkmZaNlxAesx86YKtw3hJpXsZXN0j7glLb/RiPFEPZT  
w91qL/lAZfmbHh8fQ0ik9N4o0PcBcbYOFr11QygnM98IcvcBAzGuwYIhA/hM  
dH5DrMoHhr8cd9k4XA03H53r94R9oa/fcbS/Rx/qG1sfYaR8QaTU/NFAvj78  
8mu8naTkCyGMLqwn/PUhbehur+eL1RYXI7mPa8P1VuZ6wZuvuClzz5IkaoH  
X9et10krfeEV1a68gM1l8j4//Owj5AcGPv/YUkwHrmATJD9K+AGIGSHYmFYH  
Lmgzhhoq+MFWQi54ZY2LD4WoRbX8QP7v1GsA3XaYBhhI7bp6AeTdsWlJQra  
IMHR6+Nc7Ad3ql8Ef7yq9Y+vs35ZsvjDzx1RRVK8Bgyf4tAY4vIHxwZkVROq  
ARVdFWmKAv9wTYHdUFsNsBXq5jgr6w9Efar9Eala8OZwT/WdkT8Uc/L38/er  
w5NcyziDTH8gTj7LHvmrBl7vztNokgbAym8eZJYGYCGZupxBEwDIPCn6CQEA  
kPGt9T1TALSu/eYduwVAr/XstjtvAPBNDN/tkAF40qg7gEUBkErz4s3UCwQ7  
OPfYjyEBIFBbs7scqAqBRnWHkd8CIEl4jWBDoww2NWfeDP4Ign7IFk37tUug  
TRX6kPFPAJzqp31B6L4ELN3qZuXUgaCk8Ilu0+QSNEu+bXh9IRCM9krme9aV  
4Cf9gSeHQyDcjGnJXR9XhPBR5U8t7wOBjC/zR0G/PNgpnbAoWQiEy5tS/+U9  
kAftsoGh1LVAONNWtjEYKw8MYUZPrA4C4br0E6MmJA/lAq5hf5iDYOVsleNw  
mxyMRuAY1MyCwLlrLb+qXRZ4RTdUBt8GwdxGLmvkgjSQ59Y+eTlBBO6nWnro



e6RhkziA795KEIg7BZM0l0vDs/d/Kdz2gsA3ucavzVMarsSdeUt90hg8lloZ  
gomkIXAG3AyMg4HrNo5MUUQKXibnEibHguFYIbz7VoEEqH/eypafDobIVwkv  
pRlloF1HN+PuYjAEXyu5zectATVkp+Mst4KhqmphzlpTArDxlj7zNCGQMXm4  
ZjErDpbRnFdWdULgRVxiolLmRdglKiXefx4Cgzvcm+FsouDw/ui3WV8IfHmf  
J3m4JwKzciaHz4ZDgPB5F1s2KgljP05uhXwlgRvivx7gE0Sg3s959s9hCFj3  
m37u2RWGUC+hZ6QyoVDTrPz73LQQULnUepypDIXGzO9/mPsFIfqdK8mZ+lAI  
ZJ4frisVhH0N3rzTraFgle5yOzJGEJa48QNMQ6Gw2f7za5WKILTOhPIyboSC  
79KQuWGzALhd056iFQ6Dx+K+GtFN52FIdk6DojIMcj48rS95yfwfgDBDXh8G  
k1NvhXae8UETo6EPeWsYXLT5LuyezwclW92FZENhUK2X/m7Kng9CH1X8PPlv  
r+h+LHymYjCXdN9a4mFw0FJWeBmBgcvpJ2kZj96FA7JmWmR/6VyAy17Abyr  
C4cA9qgtLj9uwEiKode2hMNe9uP2LituyLExqHN4GQ5UMe2lbnLcUNCM0xn+  
HA7hwqSpyQ/OQY0Hh/9/ghHQatkpuqjBBenVxV6jsgjwSOi9/rOWHUY+dOyw  
Po4AuW/avWXJ7DBJbHh2rzECIpdP/E6xY4cPF30dKnoJwJ9JE3flxA4ryU0/  
6Vci4INEjbZzGBvsKy0BJd5liCiS2113YQW2Ms0o+OJlqJR9FHYkwwgIST/zF  
3j+MhEGqIWLdUyyg3Xb3g1BtJGCvX5d5/o0ZfMcW5UefR4KBef0odz0zDP3x  
3mb9EAneinflB5SYIdQs2672TBTEUvSkOhifgQ/k4xozqVHgPu065FvMBDuM  
+99FsVFAq1773ieRCSi42Iqj7kUBbu+mFs6DCWRk7H/zV0RBo8PKe2VFJki3  
3Wn06ouCynSBo/NvGaHQmhJ3gigaFDkodYToGeHaU6GTd5WiwUjXzaC7iB4s  
1DcrMKrRcF4Pc3oxiR7sRmuupqhHwzqzuSS3Nz34r0vnhupFA6OYcg2ZGj3k  
caoK37SMhkdcEi0jg3SwmmBkyBsaDfbpt1Pv2dNCpFIYQXVLNFBQvvPr76WG  
5GUVtbLn0fC3nwf/sYAasr2JVv/rioaJ+VRGuQBqeJCaIj71Mvpfn86MpQhQ  
w1BHVrfPdDTc5Ru6MJFGBcyCDz7L/YwGZdCte2BLCbUHwzJdCjFA22VuKC9J  
Dif+TnEGKsfAN5m3YRyM5GBG9olMBGLg05sFa5FdMvh9+s9Ujk4MvGelNel7

SgZ6UmIRrmYx8Lmiu35ZmQxWPTL66PxjINKcejnfiBQ4lq6a2dTGQM19031C  
Hgl4r99ATA0x8LqNnO1KNA0bDtdGGyKAb8lhwB+ZxJw+vxS7IjBjgs+2hU  
pUigmaOmkPR1DIwacn2kGz4Bxua0a9UbMRCfdWuXnOwEpA6PBB2djwV00Xaj  
s1gisLZKq/krFAvyL1/lnAwlgosbOp9ILsaCnr77IJM9EYyTdxnRyMXCqxxl  
rTwpImDTaBDj116F3MbGpvjKv+hRS+6yqnMsTIsLmlWqHaPBcluD2PJYuCOI  
1fUuOkJ5spyJiZWx0Dt6YH016Ah59E63p9bEAhXp0YCjwRGiXzISxjXFQi3L  
nIUa0REy59QifdAfc7ar/C4Vjr/QKk6orW81FhR83FVX5X8i0pgdAUrBOIh6  
6zj5jfQAzS+zlf0SjgMrZ0wC86d91KStwbd5MQ6eZUmw3+ndR8400edG5eLA  
7MPbr2Vx+6g/V/YsXjsO2p5Nzaqe3EeJNcGUPM5xcFaYcHni1A9ENnv8RaEs  
Dr6TtuLHYRfNqwq6CT+KA4JXpbbV+V3UdN/gM/vjf//VqohSU+0iZ5filePG  
OBjMLq9ZmNhB/Ttqc729cTBFdqBmensHJVImjBiuxEHvxrMxtfzviFyeus6V  
Lx52/xT7vWDDrhdOR/gxC8ZD9+Q8yfWT20jv+zfZXuF4uDx9KHo8t4Uyq8Zb  
z0nFw6yioYZtyhZi5s7rnYR4cKuZEOPz+oYEKIWmNG3iYZB4PqC/6CvS+qD9  
l/tePHwe9gyfgy/Iubm5a6QgHig6HwcQOL6gZLxwfHhxPCjThZZGHW6gYQNa  
yqmH8VAyRVfx8ckGMul9x5jVFA+27m4jc3wbyPGxo8CfiXi4/uSyUSzjOoqL  
ir06TZsAQcl9ZjP0a4h/5cHNscYE+JWoQ4/dWkW9ugN3JpgTIA1T0hcysopO  
MtJkvuZKgGXRFc6p9FWU+AA/0nUxAS6zDlm+pF5FqS8rDCqvJUC5Qt8zTcZP  
KJtp9HpYZgJ83Jjan0TLScR4u10wNgG05Xmd6PmX0fgsk28AIQFK5I02fSiW  
EWO5BdarMAH47b84VI8toRyFpXGHmgSg7yx7fei0h07e/GF8ZSQB5GtMFTrw  
H1HRQ3YzTtpESEiq6AijX0SpiUmVkwjY0GClP1H9YwH50+0eZ51JBLYmr/SC  
oQWky/fq4QnORMCxXt0UClhA04WhP9dEEkFX/bBjd3geaRkMc+ov/90/KN87  
TpxDG/G5yzoJiUA9w9H0lfcDeutAokCckghGJ9Yv3zyeQS/UvdJb0xOhXahV  
5Hh6BuUQ6ciK5STCMkncy/HsGaQSvp/IWJoIY33Gxy9IZhDGz1R4rjMRVoR2

s7y2p5CsPZOP7+9EmBfa2w/9MokEznychYSVKAjTBvyv9ehIx3ZXvCBJgtOR  
DdunayfRvpjvlg11EvylcGG65jeJmn++MXjImgTi45lhbD/vkHJ25sVZuSR4  
F67baMr6Dml2Um5q+SSB52/NO4oeE0jG72PSpn8SYIbXT2UbTaDzAi18uOAK  
UOepy6RSnEBk6a5Wi1FJcHNixteebAINmg8MhWYmgUrLWkdxYTjS34p/VFuV  
BLvxxvmlP44hIy4iF9bVJFhv+TSICXiDuiySDek2/uFYi/Sjm2+QBI5eifRb  
Esgc91Ana79BtBQ8p77/SALWyyVg0rNv0NB3tYZB0mS4IPX6ClvIKFLri/sb  
dD4Zpk/+aLjOMoIkPMjvTjomg6FvHmljzCtUVJ4VM+yaDORjV2/qWb5CtB9Z  
3Ls9kuE1xyALq/QrtGl6QbXGPxkCjROtBd4NoQp0eSUhPhmG+a2YYq4MIW6m  
NAnZB8mgl/Pj0xL/S0TXSvsSt5wMXbbcpFS/+9Gg5+K+1loyuLnGtlyZ60fR  
fPX8hxvJYFDiHtvc0Y920k2jrXeS4eJ/ZrFUsf1o8laB/HniFIjR4MvEUvWj  
Allh8iauFLi0c8mXlK8PCV/Xipu+kQLphis51N49ajmUpS7tZgoslYXX05j1  
oILWz/MqdilAVv7ZTUK5B9HypyuVuKaAgBJN6gJFD/q+P/7dLSgFyC0kL7wv  
7UbNBba2v3NSoDg+3od0sQtpfw5TOfcmBYJ1b90JeHeiSP7jZu63KeAxS/LE  
wqITPbWNluGdSoHnp0jGKqAT8U/Hi5xfTAHrqbHJWoZORDyUwSgy/U8/0kp+  
6PYCtVcV/ZCjT4VDem1fHGkHkvLqexzNMBU+FpQ16ri1IbcqLSFDk1RQZgnc  
SldvQ/fXBh5ct0gFU6umF9TsbYjedjfxDYVNjtmFxxqHW9FXw3cpl6pcMqV  
y7JaqhVVSK05OWNSwWPZlmGDogVx7lNxRb75509PqRQw24QsyX4uerxNBReu  
xw7f2prQXea1UqupVKjfd2Lz29CjPI9QoqLqQDS+e2eVk2IIjhMdm8rFXay  
BEXV5p6ivZ9frrjRpQFJ54u7EuuNaPjPcjZtTQoPL5IHcPdgKho21S1jNKA  
+/b+Uz3SBqTD9YhY5t/hRFYnMqa0UY+6VROSGGzSIDdq2zezsR41R6nghu+k  
QXu5kc8fvXr0gLimUj0jDSZxP3qHIutQGGnW9MXhf4dXZ3NtHdETdALTvzg9  
mgYFIOLUnydrUSrb8Vr8RBo02oWLIvXXorvid/ZnZtLAaKyvdsCiFjXd0GdK  
Wk+D119p75c11KDvj8mvLpClw0N2k9V4v8flxSy6M0stHewP6egnWKvQt8Vn

A0pa6eCt8pVx5kclCnTfGvmkmw7FEePv6McrUXy0zdwlw3RwZSCuokmrRCWV  
yr/WbNKB2Y/kWO7vIzR3fCgN4enAnqhZxLNdgYwf+jzcbkoHcg2avEc75cii  
5cbvjdZ04GIp8isdK0c2r9Suf+pIh4X16JbhJ+XIbYvhaLo/HXpqZzKrvcpR  
rHz9tZ7JdKBqS4zO2ypDdQM7P/D76eD/ojP+80ABovvsp3lJLgNUjtsUSIVK  
0elfVvdklTLgxSWOed9TpYiNRvObuGoGSOadPkOxU4IEJE7f5dfOgGcsEnoV  
bSVINbjxyymzDKh29RBpNSxBdyh+YBcDMkC1w+blfsx99OpC4MeEpxlwpVK8  
avK4CLE9fRiq3JIBxLJZaGaiCLmpTTPttmeAZUpYEsujIkRlqaxt25sBTNel  
l1VMipBe2okqpYkMWFBUa5Z4XlgGv2b6b21nQHzmknX7f9Qb/1D8huimWA7  
LXLdmzIfnUbTxXQSmeD0sho4P+Uhx1dUSv3SmeDxoZnyqDMPkazc8ZC+lAn1  
bNbMuiF5SP2MzNgpvUw4+imVz715D3UFdeZ1u2TCRVKar1kzd1GH8rSYaGkm  
uPayavVPEdDp/wJp35RngsDLazdqWgnl7Q/Tll9lJhwUDfj0FBAQc8e1J211  
mVB6n+e3sR0B3UG9UvqdmBDMkJrvllHHOq18m5zmSA5JebuTYIHoToJahUs  
WRBhsGPVb4NDbx7y8l5hzwJdFUFHdS0cEqDoPLHNIQXkp88xLYrg0Pjgrx55  
gSwwqlVrjvqJRUI63toDMlmQQdzqoE/AoqkrVvqr170AQaHe/tu7bCRvJGnK  
n54Fcon5U7IeGESjFBXHgsmCuq9Wfc9NMGiR53UdVU4WNN6oU3RRwaDk7660  
3/OzgHaP5iQXHqBNIYoHnldlgZWotoWoaxaKHKVTMn+VBUCHpjczKTKRvUAQ  
nRYpBhKuC4WHBqShK2yF5arkGDDuURJWuZaG5Gj7VBQoMVBwieKtvGAaot5n  
9BA5hYF0/M2dielU1NhXM8hwBgMClwtVi9RSEanTasw8Pwasl2eU1NhTUEWp  
6V6QJgYq8ky+Vu0lomcm9x8baGPgsGolmm4yEfWTfnUW1MWAJ39Pb/6zRLTi  
Ej89qY8Bn7+mOLGwRMQj2tAha4wBntjiTYmTiSivkT5l1w4Dq5r3vNI4E1BG  
3ytOrygMsDEVPPXziEMFgSzvtWMw8Fqz4bGhURyqFnTAcMVhQOb8Y5EMhTg0  
lPLrxEgiBi4kCe15kMYhsmtCn0UzMWB5+bJxd3Esip5MrN8owMDNTvblgrkY  
5LumpuPcigE7yQyZH57RCGadHjq1Y+CRgiCSNY9GdGMp5E4d//Ldb3yYi6JR

devYgEM3BnJCKfu66aPRpww7XbshDiy8N+C9cTsKWcjEXLaewcABj401Bmkk  
QjGd+ka/MLApu139yD0M0QauVF3/jYHTl0WCKTTD0KwbBc31YwwwphTdl+YI  
Q8EmhsMGJ7Ihzb+4I2wkFNULl65SpUN/c/rvkzlhCKBkb9XddmygaxD162b  
OgTRsCNDVaVswLPK/vJbDEREr5PG2ZWzYdTUtG3bFYh2I9+Y/FTJBqx1lvKH  
kkA0s2R3o1EtG4zexRd+dgpEDyvj7YUvZ8PNgfvPv30NQOpKQ/7MFtmQo6Nt  
EEQagIjvmN77FpANASedGn8Z+iEP6kL24aBsYPOZTl+T8003nq/+9ykgGzza  
XxUdcPghbZ7gEselbOi96PQ8et0XMa3nVc3EZ8MXNaoxyXhfVBO8+Lwflw0E  
DibBtRc+aDnXfamwLht+H4Yv3DTwRjPSbhr+Df/sbym9GVD0Rm9GXS/qPM2G  
bwUZV6/xe6N2cufQreZseCdu3Wm764UIQbaM0JkNPUx9lKn6XkjP3FT940j2  
v0m9geEl80RPmFEJ32Y2nNRUIQsrcUfl9SqDB1+z4WPU+vLnCHf03zXlb6+2  
suHWxPPRxBvu//ZfRSX/3WxooFwLMmJwR4770u09v7KBVW+qkTfODbFMXjhh  
TImFJVfls/5et1EkntG+QgALs3gVFc3bLkgmYP3igwtYGJtbMKnScUEbjp1H  
RcJY+C1PXKwu4IJMT3vicy9ioYErqIjoxRmJ4l40Jsphods5xKXezhlNY6LF  
nbSxUHpBevqJkxOSSf/2m8cZC/ILpaz+mQ5ow73vJacrFhKGN9UcfB1QkX4B  
gdUNCzfvfukPNXNAVNR6EgyeWGg6zD3kOeeAPqaUORAFYoGLNTlAr94eZSZZ  
D80nYEGk82H16IldWo8dys0vwwKnp8JlQTNb1HuuPzHgIRbsC1x/aoAtKmvz  
CjB4hAUyic+UkcK2yGS/2ZjkMRbCPvs44Y5voY7bD+ncG7HAM1W3FmByC+EM  
450UerBA9emB+wCVDVLhUg2aXsSCptLWXnyRFTrbpujcsISFxsK9bGyoFdox  
lzXNWMGCoZhQRZ2pFarIFpVW+4yFfCoL7VIaK8RlYr5VsYWFTzjHp6/DLdHa  
lwPn4GMsjF9dD6VyvoGyW+rMWDhwsDzInxJuaY6E8xl2z3LhwF/5++tcBXPU  
G3ojlo0bB2fzxDVXmM3R4SXiGk5+HBQemmTTvTVDth2GpPyiOJCJT9R8aGiG  
xHu2GiSUcDrrE91vpEpej0sxqBnjYNUl+lraq0HGyPkx8UN9Gxyct5GLEGBI  
jIgy3ylftcXBg4Jf/WnIGMkYRLgaOuKgXPJBy1tyY1QwNvzCzAMH/eEbAZfz

jJD7pLunQzgOFIpbOFP6ryPKxUevwgtwcP0UuvNayRCVV0qTBhTiQONC81EV  
nyFSD3iueqcYB2akLzKqaAxRONVY3c0HODgZEnqKrcMAbcsc5qpW44AlzVZU  
UBmgqRRtR6J2HHz1dVe+V3sVIUsv/477gIM8JYXgKwL6SOPYQy58DgfhJl2c  
+X/100Lgvpf/wr94A/qHuKf1EJsN1bLjMg442fg43qTrocxyZdaX3CQQ6zU  
3bR/GQXMReHj/7V+1fkFae3ukgzieNiGls01LC4zxs+1UZkdK9S7DhywCXo  
UI87VxsNEkl+yXPlgJRx3ChLiDa6Uj5ZsMKT84/fluUjVbSRcR+GWIUoBz69  
FTnPO6iF7EII17flc4Dli0DovRVNFB31tdTMNAe0HZKCTihqIHXYgr+i5jmw  
eMGh0e+cBjqZpWdFciMHWJdciMjJNFBy4UPGJ9Y5sNndeQo3oY6yntvFUDrm  
wAPt6L1L3uqo8OidTbtvDvjlnVVU1Kqh9qAOVl5MDvxuPcf1VAuQioYWBzc2  
B3IjoyjwEVAH7TAXV04OnE6Iov3KDKizbjqP7W4ORCmmyJqPIIdQ3sSfGWJwD  
RqlX0++wIzQiLqj+4kkOmM/0a7a2qaDFtVy3pdF/uA1JnIHwJWtXwHVncSwH  
Zl+qxV8guYSWIsu85idygEqJukZxVgmtnGnwn3mfA3qk+zokWUpoXWMkcnwh  
B17oNbwSOVBEO0Uncd1bOVBF3WKEG1NAJy182kro8BAvbWrTXy2HKhc5FiMZ  
8BAT6TetnimHDG8PnrRiwkMWNwR+9pJDBaHnrjGx4EH1R5BIjbQckvnn9Wlc  
Fx68nrjxcj6XRU5LQmROYnhg2kmTN3svg/o9lgwF9fHQJDbr/FJQGnn8yAgg  
uYoHvwJrWWJaacQYqZi3cA0PAeNaL632pJBNFmY51wgP56My0oK7pNBBnWog  
hSUrHUyY/RvSqELB3n56654GN5T8BbPl0QpMcarVYl4cBny1a+7KIGk9hpr  
IpPx4E3FIm7OKoFmnZmDrqfiAfczTID1pAS6eGwa/CADDxSiNwgfG8TROPMt  
IXU8Hu7IG2dMnhJHHNVuHlOl/+rxW6px4ZUYqpmM2TnZhYfmaGqBAk8RZH55  
ufV9Nx7C16keu+uJIKJ2zjbKXjyMt06SugulIKP75KcNB/EQe8jBezgvjA7c  
M2TzR/HwLtmpVdNIGAHxvWDJeTy49oez31ETQuMiT45vHuGB8Rwtw00QREpL  
63cs/uDhxQ2fjTPnBFHpXb45o794eEzKH3n8RwD5k+a26ZAQQPQ+56ub7QLo  
zEJEsCQ1AQb8vrRcvSSALLD6OyfZCaDwXWWHWe08mj9c/VSlRACPpQSXTU8+

pF3LbVquTIAmJbZkDmM+VOtk2VusSoAJdhcbf3k+FD3+ugSvTgC8QtbNPCI+  
xFPdeCtKjwB7bDN/W3J4keOt2GkjSwJshjiWsPXyoC99nK9/hhDgvxv5owcq  
3ChYMdxmPIwAM62SdjoXuBHZ45mtyggCdA+IbDQwciPunFxF6xgCMJZM+/eP  
nkNm9gwWHckEWBHIDhUVPIc6j08ux+YSoFOGMsB0kRMR5DcPqZ8SQMharEY9  
lB3xV+mlrjQR4EN9lh7GIB3VcT1if95MgDbWrzR0kuxomNRZ1bOdAMMMHMeF  
n9kQ8duFuDc9BBCIXXAntmRDHt4TtPhxAnCdLVXL1WJFao9a+bm2CXBy+Fe6  
iioLai4irxbbIcDboDStu+wsSIJgIq2yR4Cui/wBAj+ZEVfcNzXrQwLUHfII  
zTYyo1/WvLfyiHIhHK/sW3aRGdXTp95jZsgFaLM89BM5g/iDb9DSSeVC3FGx  
Ab8uE8r3LMdzyeSCrFXUSTcRJsTotMtxUS4XCPfla2ZomRCRUYbIVaVcGNl8  
OXJpkhHNiXTppqnnAl8iybsfzoyIsHAhjtW4F3ivPnM4hWFapyYDqFhMc+G1  
t1HoUgADih/uzhYwz4VP1q6a81YMyLfFuljLKhdk2614L19gQNdwMOdxDrnQ  
Nek6vtpNj/pS5jRxTrmQe46FbfMRPVKOFh4ucckFsSL/FOZseiR8p3emyz0X  
pnVCzs7cokf3HRjsx+7kAsav462vDj06a2mzvuiVCzofvn0XF6dHGMMq722f  
XNCMvqHKwEKPyHUOD/765cLMQB692DEd+h/ba0Ch

"}],

{RGBColor[0.880722, 0.611041, 0.142051], AbsoluteThickness[1.6], Opacity[1.],  
LineBox[CompressedData["

1:e]wV1nk4VWsbBnA65iEaZEyUJiRkaCA3KUOFzKk2Gxt7m+cyz3svCiV7C4kU  
okGZVaRTSUR04pQQDaa0TKVo+Nb317p+11rXutZ6n/t53lfR1d+atoyLi4ub  
m4vr/1e9ub6ZQDEuAy4ptrbKpV0GQxkfKz+HDRispnPtEPOXROzTtcHXw/4z  
MB/n691xYjO6PuyyPR32y8C0lOf6j126W]htNY4KE8XXWrIhr/kDEF5crh8S  
thYu9nbuhj72yI7W3BUQtg2uSdTbqp40FGwbyN3gqgbTZwJz4ss8UDLA/Nl7  
eDvMWiva+fI98LZgaqjgnDpkp7ZSVJ97Yur3vmJehiayPpgMxCsxsLJ5autL  
KR2cFnL/7InmBycDY12/MH38nSyoeyslGGpM5QKNb/rY2z6Qfrc9GMu6xHm/

hu6FonjC4yPiIaigDPREhhrApY+ZLp8Tgt9799QZNwIRZcFlhy6Hworyj7V1  
gxFe17wSP10Ujvl8vITfugPQ+hF/hMcqEoMPTulbLhzAf8uulqUxI/H0w+dp  
dV0TqNzPHa5sisRF1ZcO87UmcJfx0elTicKBe5c2Rtaa4qdr/9XL3NHI6d/Z  
wqoxh93kCfebeTHYI+P9vbjKApaihrVXn8Th0UjotNkXC5wpv2Ru1x+HQxVx  
Y1+ULdGE3zbDX+JA0WP/u+eyJayWBjIzpOJheMvLd3UCjcVQvLMvOLh3p12  
j1v3CHYV7Q+icCegXGikSmO1DcRWjKcelk3E1KnRkzyaNpjkzMH/UknEjsHP  
IX2WNjBh5ve66CXiXsmCT3SaDVa02Fn/Op6157qij9qW2eJFWuPH3vxETB/d  
qU+dsYWUu2zXdskk6BSk/8rstMfD5iEBYiEJFZdntTon7dGzvTQlGccZCqX2  
PsKCDrC7Lz1rsCIzwpXy/cn7HLct/shyjnIy3rXcrI+od8D5YZ0HW48nI/Vj  
Z7D7ZUd4lqw3/9mYjD/jmhVFzY7Q6NyqFfgkGSFT7JHBt444obH+V1d3MpwX  
KEeOSh6Fs8bOsoNjydAS/KJmcfoovDp2t01dnYJBvEJ3TAn2FoLaG/3SoGN  
RrBiaJYTNDbkBFgFpeCpdp/jnUonnMmdo52ISkHV3kutqpN02MjCgNudmQKW  
1farii7H0F94QY+/LgWalZYuwubHcWbtqeifXEyk3M3oHVxLQctq3ZxVTCa+  
LIVHsvUpilxvbmVmM0Go56JgcYKCudMFY6McJpTvqzPu510w+Lkh2KeMia6m  
7l95ss6gtfd9Ij4yITJMnLsu4oLGboPB7bwsgPu300vOBZKfr78PEGEhVDFI  
113VBUW0vbcurWJhkOr0VvaQC6Sy61a0KrJwe0R5U1qaC0YSRQsgz4L9h/YG  
uhAVk19v/ZkOYCGVB6f3y1CRHETMyYSz0KxUTVFUpuL9NjsLrWgWttDy/3pt  
RkX9r7KL2gQLSx99DpsSVKQeJGihhSwUjooObxJwhe+ST8Wfdhb+4U+oWibl  
CoeCxX6VbhYEt3xLHtzsipDQLX9Me1kl8hpUZpu4glmpGGL/joX94zdDeJmu  
4P9cHf5gjoWJCUuBD7xueMfNfheksCB+fHJytVuUN460/tOlsDIX4ld0Rvc  
sLz5/VD30gLHxOvZkoZuSG7yZGRuJtChrbDxYJQbcg+EWsbrELgZN214Z9YN  
8r0RwYbWBIRSUzfGcrtjfZ4Ei2lHwCNLSfCQuDua531rHzoSWFfi+OLjNndc  
tZnJl3ImkNn+gCjNd0eY4clDxt4EgtacjYwbcif/W302NJ5A5zoV58NT7tjc



V3nvQBJBfudjI5lf7ni30jarP4XA+z0/BKtlaOg+fqVoNI2ALZWaM2pHwzU5  
vonUbAKVjKXlancaHPXzG/s5BERCsp3jg2loGLkvvCGXw00Utk2yZ2mQqa5z  
yy4goHNdo8aigwZd/RUOQqUEztW058j202BumZEjfo3AVBMtamychi19Dx6K  
VhAo7b6wL4HfAy9hzfvFTQJSC9w9NUYeaDZpvIVaAiFc+TUJRzza/49z8Z86  
Ai8EdS5YunhAu/XdaE0DAUKO4Tle7YHONyyOwH0Ci4Y9U3INHuhO+PXL5G8C  
VnQ1wc1tHshh3dEfeUSgJDN1g8ZrD/xNEXgS9ISAZZCR4/4fHhhSuzlb1kbg  
elRvi+8uT9RZlDiLdhFYdkXsbbiZj77R9p479oKAY7v3t/ijnphoNEgq7CbA  
K60kwj7libS5gKhl/xCg1j0/39TgiVdhGtyx/xKoHpy++bTNE6PWdfeTXpP1  
5Tvc1vPaEw0Spyvi3xCos+X9/emHj8Q1JWypbwksj6JKzQh6QWrWSMV4gIB7  
8X3NJWkvXAY44yM/SEB8NtRTbLcXqmPMPBuGyHxI98RLm3th5akJvYh3B05B  
LX+DkxeS+B/UaA4ToGd8eqEb4QW92qW21BECD2qNjg1TvWBh2B+v/J7AmsEC  
3k05Xih8+VbilemHqg67XRq9cG3lTr7XH8h62FbZMp55gaLAG+n4kYBfpJh/  
yBsvXJ8d+tVF+tFlbyJmwgtTG//KM/hEQPZZazFr0Qux9tcopaSDZjY0nROi  
o1FB115/lMBTqbh/82Xo+K5AT3UmLY+3syXKdGTPLQhVkg7x3Cl6ezcdn7Xm  
R76TfpZ+fvNdczoc4nPkd48RUKidNnzsRId66LpnwaTDBg4d72LQ8fL63zNX  
ST/nuRb2OoKOvEfNRS9IK6nynn2fSsewo8WnOdIRNtSK/3Lp4OYrbxcbJ/MU  
cf/xQjkd9l6iFCXSmy5Lv+O+S8cuuaprGqSj2kIXhdvp4G961ahLume6e/Wa  
fjqkjm5d1CG9RUptu8IkHW16URQ10rEGqWbKS3SEWicKriPd6/HJTUuYgeDW  
V+UCpFXTjWL2yjKguPNfi0nyexJqCnJMVRh4gzruVtL/vl28Y72HgYXoG115  
pNV4HJ4fP8hAlmbBlzrpJJWqUY9jDCS0bZ9UJ/3GWmxZoDcDmT7Dh2fl9dKI  
8JaLjGRg3GHHQjlpVlGrTnIaAzWtV2dOkB58uuFIRh4D8t/rTYRIp0q+TS6+  
y0BA2kN1S7JeP9JH77u2M8CKWvNsnKyvF9/cV8V+BviKO5RiSO//KuhRuEi+  
/438gfNkPqp9JAqchbxx5WyuwvhrS6z8o9MrLeCPkqe6Hs2SeuF7qHri4yxs8

3GyLcDJ/fub7Yo6beUO2TEdwmMznQItFrexRb3yVrv/HmHRjJW1T7knyfWVy  
TxbJflemZ/Fx6rxxl6p0iyLZDx94L+21b/VGSRIRd5zsF+vo8jCJPm80f362  
81w/AXWflk9Z37xxeObizGey3ybMvjzJ1PYBy5kR4dJL4GjL4m/L/T640bjj  
pf8rMo87+XTF7HxgJD7Sc4rs36ub15aeCfHBuV0i49E9BFx4DzJTq3wQ5ePj  
bNJJztMo+2azv30wnLBjUPU5Af156oLASx843ZYzFe0gIPP+pCdz1gcOH4P/  
NJHz5NWDEpMkDV/onhWe/ETOH/OoZQIxt3whFZC21aqRQM0cKPSbfUGLvWg7  
Vk/myVv65M9OX8zvXvklkpx3vE7qYxFTvnC6wcjIrib7V5fyNHybH/r1nppn  
kfNSe66BFVjhB+O5u6uai8j9xWayW7HRD1abeYrUCgm4VsvJ9jwlz53587m5  
5HxOD429ofnJD63Hzn72zCMwtmDcM6fgj/OVYjf+PU8g92eXbBjbH07fm65K  
Msn6/RXscB8BUC++Vr6dTuBglXCUhGkAPlus8dD1JMB2u1LoaxkAdv6irh6N  
zPejV+NrKQEozknboU8l1zt5Z1RMZAD4p8wk1x4lclF/d6FBbQBGpmMzHE0J  
0ESliRaVQLx6dL3/rRK5H7YnlNfvCETUt5JYynoC31KjGLf2BCKYMuk8QO6n  
KYIBE/kHA9GRuGGyR4ac53wOE+He5PMWfdUXxcn/4do4sa0iEH86ZY1ql1hg  
fH0wfkE5CB8fcpWtfsFCwOD3scCt5Ln7RyQnJogF/1cbRYx5Q5Fd/kT72R0m  
orr0Pjb0hcHc3lVabTWFbSwOu7f7JIIULkx18qVAyPOWj0R5BE5N173y1khG  
Go+w7NK1KOiMnFFkH0yCzFWR2KTCGESff3j3L79EWNRS5cnZHYfTJ776x11J  
wK2FDq2WnfEQbnRxSn8Rj9SOzvCljQmg53kIxK2IB2/87CbBzYkljFXjVjOP  
A7+u8G2vDUIQvfEmol0uFomxCYdfL0/G5qP1PxI6onGpVNZ+7fIU5K8qPsbv  
HwVt11WBQT9TMLVwQilHjxLW8lye0p/lc18jLW1CPAijcvbst6zkD6Vw/Vz  
6CQOjEXqryP3NeY1K+H2rnCs/SYkH/MiFVmJ9OTmmjBE8ma8VutIA8fguZX/  
jVDYlAaWTteexoC9XeD1lhC0bwkbTq45AwkivgrPg9Gk93qbanE6BKVyvbTn  
gqBrrWGndDoD85ESe1I3BaGs2G4+3DgTeUVKnerWgQgaNTTxaMyEqpnRz67z  
ARCRNbDau/ssXtqki+0r8sd7jvdIwe2zMJJ08Tba54eY7JWuZZvOgSdrX3fH

og/GE55x8q6eA+H/crd+iTfONty2l5TLwkgY2zU+jAHBd9fao/KzMJPOyxbV  
o80YKaeWJnMeb2arnVkSXrgX3iS9PvM8TpXt+m9suSd4HAPvXhbLxraxk3mP  
f9NAxNt8qkjJhpLU171CIjT0qFT+PrGUjZSEaiv9Le6YfLz2+Y9TbGTuYVYt  
7HGD4bVGJflpNvY3bzmwj+6K+kv817fNsjGzc0KrguYKdbbtDv15NkT6jPpW  
ubpCPnHK8Ph3NniituuMOrli8fh651wuDj6aqh9lH3LFHfHUC2tWcKA0VSCx  
Rt0VSiePLhfT5MDSvSwsd4GKPL+SbHktDthaldlS81SspM3JqelwcjuH6caZ  
poLL+ozK4d0cvLi0IMIZp2JApcU0zYiDkqK9Zwv6qWAPbUnkt+Eg4KWmYWcz  
FaK9oUKSdhzckDQydrhHRVLHw7ObHMj7ZgHz7+qpCGo4Xrj/GAePGoqOfbtN  
hUUVW5v1ENw7qixoMt16h4jExYjxF44BSL11eV0iFXpxyx2VPDvxG05sOXKRC  
2ffRmxZvDuyNtCY92FQUua1w7fbl4IvJ+r++n6NCyoky/s6fg3DpoidEBhWZ  
VhUB04EcdBZnaMudpoLf5PvCn2AOXr/ssLzFouJ/jFyBTg==

"}}},

{RGBColor[0.560181, 0.691569, 0.194885], AbsoluteThickness[1.6], Opacity[1.],  
LineBox[CompressedData["

1:e]wVx3c81QsDx3HJaBh1yswhl9k381D4fZWR5yYrpLr0IGSFUEY2x8wxf5HV  
OT8y2kkdRBqPRKWIFElD6uaEFBfV9fzxeX1eb0WvQ04H+Pn4+JIW+/9Nvz2f  
DBPnI/j4jDOjCm+aDed9uPALaojoi/BdGrkQSSTcpR8+EzVOpHKazIUmiwmm  
z3vrSekfxHT6fH0Fu454+N5kV07UT2Ke52v69OUVIvtS14U1AfxIoEnZeKzo  
JM6HhzNGpIUwqA2duGN3iSd69PZzXcsRMtRi78nuI2amuizjokQxajddv/r8  
MyLXnfbKliFFxJee595vyKquGL1KwNoqLkp//XZ8BviooxPULjFWtS6xd/t  
2f+euBXN/WNAWhJHlc7U7TAYI54NiH0jJqRwLUK2bdD9C/HRxKe5tksG5kIS  
oYn+E8TKOTGziCg6/Phf+Im4fyfk9vjwvbJTwl2JbXrZorOE1NDgSHXBevz+  
qXhx6NMcoW6mVyMcoIR6LZcdqTl80BsFGp1UYZEWhOkYE/tlQw/UMsVGBe

VxXnOrUUdj8HNZ9Jq2I1YyYjukYYrmeZuRkCG/GmZNnljpPL4fmX3tctExtx  
tX6mbknNSoRdZ15id6ljSjLLYemEOIqP6ZmERmnjll9DW8iltajUHipT9tLB  
sVxShDcjpgdoh5kK/3R9onbVTj7aWwmAlb7iyYBPaHooejPklA96vbRzBAD0o  
KzqP1b1QwJSrzK7hYT0QtmGSyZfWY+YcT4Droo82/djJX3GK4PMs9Q2yMICa  
lo9jj7wyaB089SfSRrBWpRx/FKlCUur2yzPHjeAWnhj6Pm4j1h0qzU4XYIDc  
V7F/3F8NKgqW4yYTDND6lgwY2mnAKKH0QnWXCZaLRdEnrHSwh7BkhESZ4YeS  
RqtDtD50mBqVuj/MMBzk+E5RxD8D1cJfo80R1D/6BGIVgM0egw9jo0kYPTm  
Szdb0Ai/zLdctWwBBHzvLWc0GcPB46mTE3crWNL6D1kR5ticbCNk8M9WNBsW  
1XMMcAjUtnAlTLZBx1Mz8MwsgX/Gq9cPXNuGusn2x9tvAuxjwTzPa5YYj5o8  
eNp9K6bLhbKCr1ojKCU343WTFV7fiDazn7FGH2unkaOKNe6+/zKxiWED9yyD  
eqrIGhVaT9ymm23Ae1fR+vGIDazbqjbENm9Hb+7c26bttjxyrgz48p/kNG9  
qZ9Os8MW2cBZzuWdSI72EhSucMLtt5ETtl934k8aHS8GnbCjMXHsq4Y9mPq6  
F2fknOFhWvJiC9seSZKdWgqVzrA4v3/w4HYHpLAWrPipXfB5lN22hOGIOdqN  
D7XXXdEg8TZOd60zsp5WFsyp7IVR5fGfrAeuCLRZw7B18UJ6a17/a7oHylQl  
dGtagvD5s/2y94LeeK197MTt1AjMWTzmyXF9scbWdrdzagyypAbTOK0B0H3c  
7b0yLxGG37gZYY0hqLj/aoHXnYIDIpmfOzXDoNaUw1/emY7Q17NjYeqHkSZz  
X2jFaCYOPdsgYikYia5hlYTZ9hzEPTT9wH0ehX7+9SHnvwPQnUGW9D86ijdb  
HpByyvly4Xc+SKIHvTRwpYOvwJkC6xcN18fhwA33WEmtxCyNQ4JqdXx4NGv  
/RKeKcLOK+oCJzYnYvMtEZk+WgnOz/QadBonQTRpiVOmCYms3gdH5jckg7ap  
2bgDjyCYNKW6fGMKpmkGB2IcSyHMWHnRXzkVgSn9PFnHMqQkJNsNiKWB/B2+  
XcvwJkPOr3Oli6WjwOFUKEuxHIZea8LCF9I xv9/gWMx00Zzk+fxkRpm4rNaE  
ijYKiLeIdRe+y8D4wobxHmYlrMdizRT6MhHbYjU5aV4F+o8V8vF9WWgO+lJT  
vlCFWMG8AZ3ebJQWf9BXdqG8+mw0xPNObB3cpR3r61Gj1rUSNqVXDwGwAuf

rUa76YC2Fuc4HIUvO5610AWGk66LSk4eEnRi8/3ST6G04zJ9xJKFd6yy3U33  
TyH8o4WNBwSLf3qkHbYVZUNkHeFgvjfkwmz/qr2bLwjA99WXsyH98vW4NFM  
NuKLaV51qgXwaTZ1WtbJxqfke+TJmgK8ciE+6s6xkc+96ColVwj1T9wBLW00  
lr+p74krL8TjmdN60//lwJlpp5MtW4SQbcG/vQo5aDvSLqPEKsJJz0TNIx0c  
COwOa2WLF6MPJutVxjnITHIebUwvhoRee+6IBIXHmhd+/TVfjOm/jfzophT+  
vk0//090CUq/C5jc8aZgUd+iIj9Rggy36nglJoVrVcJntKdKoPP87ue2RW8q  
2aVvNI2Cov/1GrtIUIBP4Vnsmy3BgEJ8THYmhbl9Sp5lfCRufFYrnsqmcGIv  
VqnkahJ3XC5otbloqBx1FxPXI/FUniZqVEbhZEhtsbwBiYbUkY7eRdMOjPT  
MSIxednKxfskBT6nXE27zSSWIL3byCqnMKTZuT17K4mzl6SCxyoplAyrpQg7  
k5jKDI8r5FAQ7Y9cleVCQpy02qtGUUjtvZmv6kbisOwK+vVFh3P3VVvtJTG0  
I952tlbCzkLW9RRvEu38560ZdRTuZA5ZFh4g8ZvTYNazaNNEjV62H4kfe25L  
edZT0Ai+/bIzkASD8I9Mb6Bwynu116NgEjLMn7MyjRSk93h8enOIxIhMI+fZ  
RbMcGkMnwkgMpt6rxxkKwjazM78Pk3B1EX3+ZNH/Av1GvMA=

"]]}}},

AspectRatio->0.6180339887498948,

Axes->{True, True},

AxesLabel->{None, None},

AxesOrigin->{0, 0},

DisplayFunction->Identity,

Frame->{{False, False}, {False, False}},

FrameLabel->{{None, None}, {None, None}},

FrameTicks->{{Automatic, Automatic}, {Automatic, Automatic}},

GridLines->{None, None},

```

GridLinesStyle->Directive[GrayLevel[0.5, 0.4]],

Method->{},

PlotRange->{{0, 1650.02965}, {0, 3101.894146}},

PlotRangeClipping->True,

PlotRangePadding->{{Scaled[0.02], Scaled[0.02]}, {Scaled[0.02], Scaled[0.05]}},

Ticks->{Automatic, Automatic}] \) \!\(\^*

GraphicsBox[{{},

{RGBColor[0.368417, 0.506779, 0.709798], PointSize[0.6], AbsoluteThickness[1.6],
EdgeForm[{GrayLevel[0], Opacity[0.3]}]},

{RGBColor[0.368417, 0.506779, 0.709798], PointSize[0.6], AbsoluteThickness[1.6],
EdgeForm[{GrayLevel[0], Opacity[0.3]}], PointBox[NCache[{Scaled[{Rational[1, 2],
Rational[1, 2]}]}, {Scaled[{0.5, 0.5}]}]}]}]},

AspectRatio->Full,

BaselinePosition->(Scaled[0.1] -> Baseline),

ImagePadding->Automatic,

ImageSize->{10, 10},

PlotRangePadding->None] \)      blood

\!\(\^*

GraphicsBox[{{},

{RGBColor[0.880722, 0.611041, 0.142051], PointSize[0.6], AbsoluteThickness[1.6],
EdgeForm[{GrayLevel[0], Opacity[0.3]}]},

{RGBColor[0.880722, 0.611041, 0.142051], PointSize[0.6], AbsoluteThickness[1.6],
EdgeForm[{GrayLevel[0], Opacity[0.3]}], PointBox[NCache[{Scaled[{Rational[1, 2],
Rational[1, 2]}]}, {Scaled[{0.5, 0.5}]}]}]}]},

AspectRatio->Full,

BaselinePosition->(Scaled[0.1] -> Baseline),

```

ImagePadding->Automatic,

ImageSize->{10, 10},

PlotRangePadding->None]) liver

\\(\(\*

GraphicsBox[{{},

{RGBColor[0.560181, 0.691569, 0.194885], PointSize[0.6], AbsoluteThickness[1.6],  
EdgeForm[{GrayLevel[0], Opacity[0.3]}],

{RGBColor[0.560181, 0.691569, 0.194885], PointSize[0.6], AbsoluteThickness[1.6],  
EdgeForm[{GrayLevel[0], Opacity[0.3]}], PointBox[NCache[{Scaled[{Rational[1, 2],  
Rational[1, 2]}], {Scaled[{0.5, 0.5}]}]}]}],

AspectRatio->Full,

BaselinePosition->(Scaled[0.1] -> Baseline),

ImagePadding->Automatic,

ImageSize->{10, 10},

PlotRangePadding->None]) gi

(\*-----  
-----  
-----next mouse\*)

vn=readTac["C:\\Users\\exx\\Downloads\\plusminM5, Liver 2.490375, GI  
0.53925, ID 4255.csv"];

Lv=2.490375;

Gv=0.53925;

id=4255;

vn[[1]][[1]]

{{10,385.537},{30,562.462},{50,199.535},{70,120.63},{90,88.7089},{110,71.8082},{130,61.5918},{150,60.7066},{170,55.2421},{190,52.8657},{210,49.415},{230,45.2755},{250,45.5216},{270,43.585},{290,45.3301},{330,38.2161},{390,34.8023},{450,32.3994},{510,28.7552},{570,26.661},{750,21.5214},{1050,15.8844},{1350,12.9774},{1650.04,10.465}}

model= mouseModel[Lv,Gv,id,27]

ParametricFunction[!\(\

GraphicsBox[RasterBox[{{179, 179, 179, 179, 179, 179, 179, 179, 179, 179, 179, 179, 179, 179}, {179, 180, 180, 180, 179, 179, 179, 179, 179, 179, 179, 179, 179}, {179, 179, 180, 179, 179, 248, 248, 179, 179, 179, 179, 179}, {179, 179, 180, 179, 179, 253, 248, 179, 179, 179, 179, 179}, {179, 179, 179, 179, 179, 248, 248, 179, 179, 179, 179, 179}, {179, 179, 248, 248, 248, 248, 248, 248, 248, 248, 179, 179}, {179, 179, 248, 248, 248, 248, 248, 248, 179, 179}, {179, 179, 179, 179, 179, 248, 248, 179, 179, 179, 179, 179}, {179, 180, 179, 179, 179, 252, 248, 179, 178, 179, 180, 179}, {179, 180, 180, 179, 179, 248, 248, 179, 180, 180, 180, 179}, {179, 179, 179, 179, 179, 179, 179, 179, 179, 179, 179, 179}, {179, 179, 179, 179, 179, 179, 179, 179, 179, 179, 179, 179}, {0, 0}, {12, 12}}, {0, 255},

ColorFunction->GrayLevel],

BaselinePosition->Bottom,

ImageSize->{12, 12},

PlotRange->{{0, 12}, {0, 12}}] \) \(\

GraphicsBox[{{}, {}],

{GrayLevel[0.55], AbsoluteThickness[1.5], Opacity[1.],  
LineBox[{{9.09090909090909\*^-8, 9.090909090884856\*^-8},  
{0.0874367476365131, 0.08197166587636243}, {0.18222810297558026`,  
0.1358255024317191}, {0.27073779576926765`, 0.13315455086535802`},  
{0.3575112797365835, 0.08143316377978886}, {0.4516394623155443, -  
0.007347854733426912}, {0.5394859823491253, -0.08816932746972758},  
{0.6346872009943513, -0.13787329990112937`}, {0.7281522108132057, -



0.12816574147938434`}, {0.8153355580866803, -0.07001063326902106},  
{0.9098736039718, 0.02121659675083076}, {0.9999999090909091,  
0.10024804094746914`}}}],

{GrayLevel[0.55], AbsoluteThickness[1.5], Opacity[1.],  
LineBox[{{9.09090909090909\*^-8, 9.090909090880112\*^-8},  
{0.0874367476365131, 0.08090369567458766}, {0.18222810297558026`,  
0.12746559200130417`}, {0.27073779576926765`}, {0.1116266937044405},  
{0.3575112797365835, 0.046963725126600256`}, {0.4516394623155443, -  
0.04509050859182233}, {0.5394859823491253, -0.11115559892361665`},  
{0.6346872009943513, -0.12642564594664163`}, {0.7281522108132057, -  
0.07740196037964171}, {0.8153355580866803, 0.004179083230780074},  
{0.9098736039718, 0.08937493944143977}, {0.9999999090909091,  
0.12834702174618903`}}}],

{GrayLevel[0.55], AbsoluteThickness[1.5], Opacity[1.],  
LineBox[{{9.09090909090909\*^-8, 9.090909090875369\*^-8},  
{0.0874367476365131, 0.07984396759533968}, {0.18222810297558026`,  
0.11939549826670079`}, {0.27073779576926765`}, {0.09184904274707059},  
{0.3575112797365835, 0.017913117173780694`}, {0.4516394623155443, -  
0.07109962300031061}, {0.5394859823491253, -0.11717052830989395`},  
{0.6346872009943513, -0.09879571259704382}, {0.7281522108132057, -  
0.022693471356141894`}, {0.8153355580866803, 0.06128703302641453},  
{0.9098736039718, 0.11605625481609519`}, {0.9999999090909091,  
0.10415981267620744`}}}],

{GrayLevel[0.55], AbsoluteThickness[1.5], Opacity[1.],  
LineBox[{{9.09090909090909\*^-8, 9.090909090870287\*^-8},  
{0.0874367476365131, 0.07879243663407876}, {0.18222810297558026`,  
0.1116081822210312}, {0.27073779576926765`}, {0.07372482040530459},  
{0.3575112797365835, -0.006267252216927747}, {0.4516394623155443, -  
0.08743897872291118}, {0.5394859823491253, -0.11109134853087661},  
{0.6346872009943513, -0.06371549528296311}, {0.7281522108132057,  
0.02544576624054603}, {0.8153355580866803, 0.09464282937855747},  
{0.9098736039718, 0.10731931496853601`}, {0.9999999090909091,  
0.0516787429232188}}}],

{GrayLevel[0.55], AbsoluteThickness[1.5], Opacity[1.],  
LineBox[{{9.09090909090909\*^-8, 9.090909090865543\*^-8},  
{0.0874367476365131, 0.07774905743802465}, {0.18222810297558026`,  
0.10409673959866513`}, {0.27073779576926765`}, {0.05716133039337165},  
{0.3575112797365835, -0.026084496726167965`}, {0.4516394623155443, -  
0.09591154799603378}, {0.5394859823491253, -0.09685594593277226},  
{0.6346872009943513, -0.02730376120671303}, {0.7281522108132057,  
0.061646715198529656`}, {0.8153355580866803, 0.1046634148537508},

{0.9098736039718, 0.07509702498429204}, {0.9999999090909091, -  
0.006536873471333553}}}],

{GrayLevel[0.55], AbsoluteThickness[1.5], Opacity[1.],  
LineBox[{{9.09090909090909\*^-8, 9.0909090908608\*^-8},  
{0.0874367476365131, 0.07671378556951527}, {0.18222810297558026`,  
0.09685439581479163}, {0.27073779576926765`, 0.042069810325321415`},  
{0.3575112797365835, -0.042006785469922474`}, {0.4516394623155443, -  
0.09808544986431629}, {0.5394859823491253, -0.07760167026270944},  
{0.6346872009943513, 0.0063643674428021085`}, {0.7281522108132057,  
0.08405712128907425}, {0.8153355580866803, 0.09555213349985489},  
{0.9098736039718, 0.03202960165577907}, {0.9999999090909091, -  
0.054402034659985464`}}}],

AspectRatio->1,

Axes->{False, False},

AxesLabel->{None, None},

AxesOrigin->{0, 0},

Background->GrayLevel[0.93],

BaseStyle->{FontFamily -> "Arial"},

DisplayFunction->Identity,

Frame->{{True, True}, {True, True}},

FrameLabel->{{None, None}, {None, None}},

FrameStyle->Directive[Thickness[Tiny], GrayLevel[0.7]],

FrameTicks->{{None, None}, {None, None}},

GridLines->{None, None},

GridLinesStyle->Directive[GrayLevel[0.5, 0.4]],

ImageSize->{Automatic, 28.4375},

LabelStyle->{FontFamily -> "Arial"},

Method->{"ScalingFunctions" -> None},

PlotRange->{All, All},

PlotRangeClipping->True,

PlotRangePadding->{Automatic, Automatic},

Ticks->{Automatic, Automatic}] \) Expression: {Bl,Li,G}

Parameters: {k1,k2,k3,k4,k5,k6}

]

```
Manipulate[Show[ListPlot[vn[[1]],PlotRange->Full,PlotLegends->{"blood","liver","gi"}],Plot[Through[model[k1,k2,k3,k4,k5,k6][t]],{t,0,1500},PlotRange->Full,PlotLegends->{"Blood","Liver","Gi"}]],{k1,0.001,0.2},{k2,0.0001,0.1},{k3,1.*^-6,0.01},{k4,0.001,0.2},{k5,0.0001,0.01},{k6,0.0001,0.01}]
```

```
Manipulate[Show[ListPlot[vn[[1]], PlotRange -> Full,
```

```
PlotLegends -> {"blood", "liver", "gi"}],
```

```
Plot[Through[model[k1, k2, k3, k4, k5, k6][t]], {t, 0, 1500},
```

```
PlotRange -> Full, PlotLegends -> {"Blood", "Liver", "Gi"}]],
```

```
{k1, 0.001, 0.2}, {k2, 0.0001, 0.1}, {k3, 1.*^-6, 0.01}, {k4, 0.001, 0.2},
```

```
{k5, 0.0001, 0.01}, {k6, 0.0001, 0.01}]
```

```
Clear[newmodel]
```

```
newmodel[k1_,k2_,k3_,k4_,k5_,k6_][i,t]:=Through[model[k1,k2,k3,k4,k5,k6][t],List[[i]]/;And@@NumericQ/@{k1,k2,k3,k4,k5,k6,i,t};
```

```
fit2=NonlinearModelFit[vn[[2]],{newmodel[k1,k2,k3,k4,k5,k6][i,t],{k1>=0},{k2>0},{k3>=0},{k4>=0},{k5>=0},{k6>=0}},{k1,0.008},{k2,0.0001},{k3,0.0014},{k4,0.001},{k5,0.008},{k6,0.0001}},{i,t}]
```

NonlinearModelFit::eit: The algorithm does not converge to the tolerance of  $4.806217383937354 \times 10^{-6}$  in 500 iterations. The best estimated solution, with feasibility residual, KKT residual, or complementary residual of  $\{2.70376 \times 10^{-11}, 0.0000711384, 7.25728 \times 10^{-12}\}$ , is returned. >>

```
FittedModel[newmodel[0.0154873,5.86338*10^-13,<<22>>,<<23>>,0.0129681,5.86338*10^-13][i,t]]
```

```
{fit2["AdjustedRSquared"],fit2["AIC"]}
```

FittedModel::constr: The property values {AIC} assume an unconstrained model. The results for these properties may not be valid, particularly if the fitted parameters are near a constraint boundary. >>

```
{0.973507,945.58}
```

```
fit2["ParameterTable"]
```

FittedModel::constr: The property values {ParameterTable} assume an unconstrained model. The results for these properties may not be valid, particularly if the fitted parameters are near a constraint boundary. >>

|    | Estimate                  | Standard Error | t-Statistic              | P-Value                  |
|----|---------------------------|----------------|--------------------------|--------------------------|
| k1 | 0.0154873                 | 0.00220711     | 7.01702                  | $1.51079 \times 10^{-9}$ |
| k2 | $5.86338 \times 10^{-13}$ | 0.000569255    | $1.03001 \times 10^{-9}$ | 1                        |
| k3 | 0.00119839                | 0.000123283    | 9.72072                  | $3.2376 \times 10^{-14}$ |
| k4 | $5.86338 \times 10^{-13}$ | 0.0003039      | $1.92938 \times 10^{-9}$ | 1                        |
| k5 | 0.0129681                 | 0.00231606     | 5.59921                  | $4.50512 \times 10^{-7}$ |
| k6 | $5.86338 \times 10^{-13}$ | 0.000151485    | $3.87061 \times 10^{-9}$ | 1                        |

```
Show[ListPlot[vn[[1]],PlotRange->Full,PlotLegends->{"blood","liver","gi"}],Plot[{fit2[1,t],fit2[2,t],fit2[3,t]},{t,0,1501},PlotRange->Full]
```

```
]
```

```
\\(\*
```

GraphicsBox[{{}, {}],  
{RGBColor[0.368417, 0.506779, 0.709798], PointSize[0.016666666666666666`],  
AbsoluteThickness[1.6], PointBox[CompressedData["  
1:eJxTTMoPSmViYGCQAGIQDQEqDhq/jNinS1Q4QPh2DvOv7ni7cXljlO/pYGJ1  
rVrhYwaE3xDoUC3/96mnRhyUH+ZgqrpnY5xuGJQf7SA0pSB61+dACN8hwSFf  
7+6Kfaf9IPwDSQ5Sq7OuFkRB+Q6pDnVrOQv/zfOGyqc7rO08vPBCnhdUPsvh  
0peHRfjbPaDyOQ6zL99sd1nsBpXPd2Dlb2Q5egjKf1DgILBqt//DU64QvkKR  
Q7dMrbrjKqj8ghKHW3nq25ZLO0P4CRUOAouyRTenOULV1zi8L7P8o2DsADWv  
3sFhUa9P6EEbCP9CowPf0qjXpiutIPyCdod2R/+dFa2mEH7GBAeZ7htvrxzR  
h/AlpjoIcnB2Z37RdNjA/LxH48RMB3/9lnvC71QcAIMmc80=  
"]}],

{RGBColor[0.880722, 0.611041, 0.142051], PointSize[0.016666666666666666`],  
AbsoluteThickness[1.6], PointBox[CompressedData["  
1:eJxTTMoPSmViYGCQAGIQDQEqDhkh445e2+DtA0HbOayUcNIsXZ4P5Xs6WDhU  
XTm5qQ7Cbwh00M48aj5ldROUH+Zwbe1Pn4uWLVb+tM07fZKvHS1aIXyHBAev  
DLXi5ZxtEP6BJIe07NqJCZ5QvkOqg2t9xrOV/jD5dldqb8t4G2OYfjaDFqMh  
Z7s8TD7HIX333Bt952Dm5zsEv2cJe5kBT8ocJgqwJ7y6i/UPQpFDix7xOzm  
5EL5C0ocvs3cbFca1wzhJ1Q4hHKb7e9+1ghVX+MwXyc7sLWjAWpevYOu+p+1  
Fqug/r/Q6GD5Ynvlqes1EH5Bu80+2cIK+pEVEH7GBAefg1LpmyuKIXyJqQ6t  
TNGn5kUUOGxgft6jcWKmw5IyqSNJOTkOANxgcwc=  
"]}],

{RGBColor[0.560181, 0.691569, 0.194885], PointSize[0.016666666666666666`],  
AbsoluteThickness[1.6], PointBox[CompressedData["  
1:eJxTTMoPSmViYGCQAGIQDQEqDie38PLtmarnAOHbORivE/40JzUGyvd02CDm

4qnLkQDhNwQ6uKqsL95xJAnKD3MIT1Be0smTBuVH00RsmDL+YE8mhO+Q4CAh  
k2+zkqkAwj+Q5KDEJbNfzboEKp/qkHNh+r17lRVQ+XSHJl+nvk9atVD5LAe/  
J5PjH5Q0QuVzHBREvER3q7RA5fMdSl3vT+Zd0A7hPyhw4La/+ /T7sS4IX6HI  
QZY/x9tYpA/CX1Di4NxxzfU9UwCQIP6HC4Z1tTNEci+lQ9TUOXHsm+6/fMRtq  
Xr1D5NIvPvZH50H4Fxod3N4I09y8tQDCL2h3ij7q8s1w5RIIP2OCA/+OdTMS  
81ZC+BjTHcq/7I+ZLbzGYQPz8x6NEzMdWrcalhmdXesAANmocqE=

"}}}, {{}, {{}, {{}, {{}, {{},

{RGBColor[0.368417, 0.506779, 0.709798], AbsoluteThickness[1.6], Opacity[1.],  
LineBox[CompressedData["

1:eJwUmHk8lN8Xx1EiaymKUAllTVli3efY9yWzGELITvYt+74vY8ZYsvi2oESF  
bKkUSrYsSVRSSZE9e5bf8/trXu/Xfe69557zueeeM0ftPI0dGOjo6Cx30tH9  
/1fp7+C8NycddrC+L+hnZh58zjf5aCrgC2aRlXzoiVleRLQJ+D4ImMbGmWQy  
in7nwrsxBWJqwCam1mN8slE1F1YW3qiFBrAD4WLZ2H+7coB1neOCX4AACD/n  
XBNrzAJ+C3u6T/qHga2SS4k7MAsofPn8rYhyBHhutZSOy2aB2AXZu0yuQiBy  
IYlZppwK+pufjQYOikKB3dVlrA8oQAuTVfAKkAIWk0uDgT1kKJD6cv2YnTSM  
2Vat+uSSofhLwsYH/ZPAzWradsKWDJ8LZr4WUGTg0p3AJP+JDJjZUr3N6CoL  
27YaQa5a6cD1Ykas/+BZ6PtXO8mvngl8B1qGH6SfheC9qeUqk8lwyDMvJX6n  
POzeuCeaQ04G4cNq0wpz8iBNghFpHE2CsxF5j4reKMB26KHY1PREsMDU5D0C  
LgDv56SbPALxIj0gXnBq+QJM7l78qNIVBwzv9jAu+SPgGqkQzwiPgZLrL30h  
/hgIza2ioLFY2ELna9UaAM4rihUJPIsBQ+v3xsb1Kmb8zuKxZ0EUKER7pJb  
U4G51+jhgHUUCBc31HMrqELkVrvh0SNRSDZddGSoThXmZGplLe9Gwq2wqzOX  
69QgR6AJ7fWlgMX8XclXazXAYr+QlPG+UBhpunbBYEUD3geE6a+Wh0Db2NSc  
jLwmWPP/C2HTCYGbkv1mizWaoHWn+LVrfDBoNBaKhNRoQV9Pk4s35zXI/XTu  
ZeITHZB5V9Luax0A0dtlfq5LOsCnRSypZg8A92OHT+id0QWVR7a/Dj73B2U3

xgzOJ7pQdEDRQVHIHybXey2zq/Wg+EmAhP+KL5znc1u9XXURTjRfZojt84aW  
7/5z2rMXIdzJvs8l2xv0yiJ/z4obQPE5Ti++S95grZT98fwtAxgpEaX2jnuB  
8kObzy5ahnCwhGlon8kL7HtTGunljcDzRUdO/nt3KD2TWfeeaAT3SuUF7H3d  
YTovu7rExwi2mpnTfPe5Q4Ddfw/0K4xALj//AMnMDRL+1uTniRiDs7H17Mtp  
F7jP/T301H4CXAhPTy43coKZa7+CdsoS4LgkKwPLDic4PTLlN2hAgNDcAprn  
E0doLF5xD0shQMRgUZmWgCN0ybNbvWUgggL/ma73q/YwZ37ugu08EQ5t59v7  
f7YDuecXFOQ4TaDBwbR/ON8OrgmpnmGSMgGn4vPTPNZ2wPBHX6rc2QQ4it9d  
Z/phC/tCrwisfTWBnm/qlCHLNnC2IH2T3G0KWensF99HW0PZrQW57j+mIKIS  
xb4gYA1HskzdWXebwfDftmHLBitgfST4KU7VDN5fZtfZvWIJoy8r6oLrzCCv  
t7VLL+ISJP/s9rW/RQLOwDtCm29IsD0hW/bfCxKcUbbVYQsggd9M9veRzyR4  
tvctrigICS6vWBUZHHzCHstlTL+LjzUBu96z0xVRzOBGja25pYgojkpyT8gEW  
wOlfcB7gCBEIp3yP+IMtoHI4PXrvCAHazgySKh9ZgEjbg082+QSoQoVvJP9Y  
wJ7n9kMJhwiQaHjy7lGbS/A1Kqz63jFjkPUzsGHVsQSjyNOwQTKEkqCqHC0n  
SyifoejOCBkCf9iBd3GxlqD1Tope9JMBMMV/vUD3whJWeF8dG9xtAJ9zPA8t  
nbYcZav8v2cD9SH+acaHEdxP3eZZnofTdWD2X2BI9gVryE2Y+G9aWgdISjZH  
LlpZQ+tAt93eXm0Qfybj+izfGglz2kQ1eLXh3fPezRuHLsNAyDnNkTpNYPuW  
RHnAZgOsd2N8NmTUAei37BP5bSDTUouB8aca+B/1kbeXtIGGXXvJAtfVYMTW  
4vMhPRt4saGq6sWkBo+/i4umpNjAXHmVlfyMCpiOddS7sNhC1uMzc6cmAJJ3  
Qqo6ny3E6k7VUx4AvBCutj4qbgv8vF8Zu7wATjjk7xjStoX6e2kJMSsY/Pvp  
rq+VZAuKpyQCHpxFUPSL/Zsosx3cJReWRW4qwnum6CqGg3bQeZEc+SjfeXaf  
WI4bOW4HrfJTb0gXFMHHeUQ8W9MOvF4LmyVGK4D6RIUfy4ldpPDdOHCJ/xxM  
ThowjzFegYyPDU3DSWdAY3Hiz6P9V6CNVHu+WfkM3NqMeRd27AoU5ILizXU5  
uLSnLvua8hXw/6Q7fdBTDjrPHBHRDb0Ccm/0uT7YnYaKyDnlyoUrcCXMRf2b

zylgSU4WiaC3h59slsTgc6fAkSq8W2+PPawXfKB+2JKBw8Wknp9S9kBXsbu5  
000GyB1N1rwu9uD5mvZo2fkk+PBkhkR+tYcXGbQLjuqS0H1Y4rL+jD2EmHAo  
t45LgLhYqwrfpj1QlQ4q2iZJwI/za7ur+RyA22nvI6xPHIi2trm/TBxAd2X5  
qLCPGJx9cOrJxU4HSLW6dUn0lyhQnnTkHvrkABKL8+Lh10Vh5rID6O8JB6Bv  
ns/6cFEUSnrzVKOZHMFFo0w0pEEEDq7Q9z1RcYQGTgHs3E1hWffum+GvdwTO  
bp0soTQhMHSR3n38rSPYPfHQpOkIQTE5+dipIUcIIDB2qjELAEGrCkl9zRE6  
v8gy+MQfhQehVS+vKjhBh6GydGnaEbCuzcp6Xu8E6yd//bBLEoDqkkmKtrdO  
cEd+76OLggLAskv/bd+QE/j27fzyvJofaomMW+NrtvA42yaMe/wQ7Fnwd+JU  
dIaW0hsBOy344JWkmaJNgzNEmRi/pkYfgIPEKqJruzM0bbLWm0kdAI8QTK+/  
YWcQPMleZTjEA4fa39xOXHcGQ7Wqrh45HvBzOsf+WNEF8ofF9lHX9oPoLd5R  
+qcusMF37lBaDReEvVfZ+1wAbTynLXGhwv65nr383xyAY0rQpvt3JBBJas  
Lf7PBR5zSBmNP9gLHz+vVxqfdwU+PkuF1cd7IPnA57jbT12h4FOKxal2dlhL  
//XMrsMVvISV7onYsIPzrr9LRz+5wnGVcAp1hQ3U13Y7Fq27wkuZc61vxNmA  
rl9e46aCG9Rr7yxkuMUC/unUXTm1bmCoFBsd+I4JxhgLkekbN3hB5/HvSTAT  
GIfdD+AedIOC7RtnhI4zgYz7y3HqshsYU80v+cTsgknt2dfkM+4gdVf2V4Q2  
I9gw6iYkV7mDwKi3+xbTDugONX2h3ewObHccBLEWBriwaLvC30803ywfM3IH  
MQDfjyCnhAV34PllB93YooeBpmLN2FNXYThP4ubDHfSgE8rAHP7wKqQtXyqS  
ct/C6v+yw4UXV6EgXaPs+/YmndsKNN2ij+yocGduny0vbxBgtZH4Hz1yFp770  
XxabN7Ameeu2QCkPyLR/n9wv+w8787c+0bvMA+b1KZELhqtYJ+FP79EGD8g5  
z0MRp1vF7Kr5D/W1ecDokVwmz0crWlp/RLnsuAfskN95i3P/CvZ7Ra3v7xFP  
oC2QJI1+LWHXN94dCsj2hIfjeX7LDX8xGSt6B9G7nsB38/Uft2t/sdfPZCs+  
VHICNX/0dP25v9jfcBrI93qCmv66/VD9AlYcWS67wegFnn1ILL2t8xjdDl+z  
Z+AF8X8IC+wZ5jDdKtZQbi0vMOs1DX07PotlX7ITdNXAC65KPaV6nJrFJFsG



JgSsvaAoW3oj7soMZh53LjQ8xAs+hCmYRQ1OYZVMW0VYjRdYsE0xTK9PYJu1  
2a05z7xglEnlaMGdCUzL+eTkbIsXiMWOOn/YwmMC+ttmcLur3At7Lgc6Wpb8x  
tuTmVrp5L8iYKfDa7fQLc2BLmnwp4Q2tpzj18vf/xCo6ou/XnfaG79Wz4bVt  
Y9hycqjrw/PesETzHv0RNobF7/aazNf1hgAB9gM2f35gxbvMJgPdvEGlO6lw  
su879ptOZFKqzBv4b/zkIXaPYJJNgveFq7zB2MNAoC9zFAuK00h66Kk35AU7  
Hxl3HcWYt1gnmTu8YdjS9U/tq6+Y2L+FiR+T3mB1/HjbT4YRzHWpaSJP3AcY  
V7+3j3QMY5XVDfflsj4wAo83HdyGsXXfapcERR/YtVZrp8U2jKUslEz46fhA  
b/j2ZRbjIezBbPqEgasP3F1L6WaYHsSmJywnGO/7gNDRpZvlgPY2Xum9zYe  
+8DBr1z7VzgHsHBnQ5e/9T6gc95ITqjPcbxS3Vi9K0PpFTG25Sefl9Jj4IP  
PJ3wgZN6q6vM+/oxr5HV395iviBvr6Ewz9SL6VHiTn2T8YULESW1D7p7sBma  
XMGG53xBfST64YnsHmy0XIL1pKYvvL5v4WF2vAczDLOWmrL3hbvmHSdu3OnG  
ZPhbvB2LflF7IwVSLrMDY+sxBBgo8YXRqaLgKLk07HfMFwb1h77g0TNKZhxq  
x4r+LFOPPfcFxfwzrXdE2rE9T8VqRj/5gppBVHRfZxs2Z56xbnHAD2j29uxp  
Bq+xTnZ+1XZBPjftm2M3/kaK31ZmqIlg6gcq79QWQxtaMRuxV/wHz/jBmZWk  
AS0xVqxnDRENGPtBwdDLC8pcLdijHIsYg3Q/0L5QPhbK8QpL1f3V8ZzmB6d/  
KCW09r7EnLd990vf9IOU4VtBw7SX2BGntLtsD/zA1mZMyPrIS4x8tunN27d+  
8PpL76dl1IR5DoiwqTH6Q+xxF6q04jOMdCr5RxqbP6g09nL3DzVikDbTMLjP  
H3y9ntZUBzdie9RrXdzwOlzzq4P14aan2KNqrTcUzB+eh53tP2HegC1Q3aK/  
XfOHCvelzJdNtdjw7DtziSh/oHHTS3r71GKvdOVO+Sf6w/k3D+aFRGox6o7N  
r8w5/iB+KxOLTKvB5HzTL8hU+8NMy8XbbS5PsADjx6vhM/6wZ0+jWI9+FWZd  
wd3TtuQPwj2HJfgqMI0WIJLuDb9YeST8mnSu0rswCsV02LWAPCOcHkgQKZE  
6k69r+o6EQClZh9SWJweY2t7Vjz4rwTAw86vn+xsHmLf3S9pOLOgWjJv1eH5  
1Qqsve2FwCPvALhZrX/5PaUCux6Z2KkaGQDhgux2Ke3lmOicr7jzbzQDwchjR

O6P9AAAt9p/SzFjAADuocF/kdcQ+zVWQg3foaAGaC6yLPhe9hGnfftCf/CoDz  
Fu8Th9tLsb0hxo8urQTApCn73X6+UqxY1DlkkycQCj542qq9LcbehVH3KpsG  
AseMin6M5R2s+jcpVsw6EN7U38iq23cHu04QXNnrGAgKJUTFhY7bmL3Yvc/f  
/QOBh1FG8Qp2G1t9/7wklhYI9z2kiwdO3cKEJCcvtL0PhNQLKFNKpQhjynn4  
6NHnQBh4UvuVnbkIm6L3P5Y3Fgif1CxDQ24WYrWD28yui4F43bSYu91YgOnF  
cL9n3R8EtF8pgrEcN7GAYXA1IARB00njsbXlPOyS+q4v8peCYGfKT1HR63kY  
POowOHlICB5eWifeRHkYa7zpmXmflGgNUiFcSsnFik6501EpQfDDuje68HQO  
9jYxj/tDbxDEh/jwZj/NwlR+z2bKDwXB5+njx68EZGGNmlppuaNBQnzL8J1H  
Ngur2LUWYzGL88+mI8cfUDFKrIX3CNs1+G/fl/b8+xTMlJAb1zzGpzV+OFr  
103G+r/6a2oaXANEDjTTySZjeli3SqnpNWhQkCVNW5MxtBWu4OpwDVZJ86s1  
YxmYUOio6Ez0Ncg+W/fipGo6Nhl4m3752TX4+6KSIIClYFcG/22Ytl6DDMVk  
VcmxZOzzWeJqbec1uJw73+Canlx1L+2cvfbpGhxtiZByGk7CKn0dP2+uXoMZ  
beabiwmJWLCnWC2jXDCCZAqJ5eWJx/52R1U6ng+GX0sZ/9l2xmHu0sPlb1SC  
odto8XdhTBxmPZ18J8koGJz6dQsXFmMxFbepTHbPYCCk5Wlc/x6DsTg9dOe+  
HwyDDwIT1X9FYZEDzju4K4MhsuxNTGjxFLasKnR9f0MwHPyk3PXEMQr7foT2  
Zl97MHCXSLi/mojEGoaDhbgmg8G/RyyRuhiBuV7U+MghHgK1ZQ97bseGYqON  
2x4csiHAc/DGgziBUMxUop6RQzEEqChg/XNtCKbCLHmaHe/7X3WYD32YC8b4  
Xu1NZ3UNgeErzkftfa9h7We+qDLfDwH5Fe+N9JoAD05kDzNVhoDwyS5VT/sA  
rIbL0JupIQSWTeWmg/YFYldmXxXsag+B7AAXkRU/fyz4Xunazkl8fvHyiKi6  
HyYu4PeQXjwUXr74fPMfjw9WICKlQS8bCmYHH2xRB7wxnvXxz3SKoRBknrF9  
kOaNMQyas9DphEJ3m/PLYR5vbJiMOWy5hEJEOWVyRNGLS9nJeujfvVBYmN/Q  
ut/jjnEcyoeBx6EgE2u/ednVHSOfknJ8WB8KH4dLnSMZ3bEsa4PHV96Gwt/P  
X6f+YG5Yfh1Vs/N3KGisuRv/aXHBKtz5/W4eD4OfW7t2FLE6YTIx5XmBJ8Mg

YrVDv6feEavMQy+M5MMgjsFrv5CLI1b72oZll2YYkBSlnvN1OGBNR+4WeTiG  
wfc1/tR/N+yxvvdSXdjdmBgYP+IN8LDDiH+eL/CW4/Ppjp4dl7TDPtAbHlys  
DgOan3KQzZQt9kna50ppSxgIOGhGbV21xcYSa9b2jIWBAdvSc3KIDbashll+  
FwoHhoOROYdDrLAgQo9uo3g43BsmKl3jssLWXWy9s2XDQZDtyW31MktsOzum  
UUclHCb7sg00fLuEMc+/Ma6yDYdvEr1pFLYWGN9dw4jYonAwyQr0nq0aYTKP  
/KQGS8Kh0gSODqmbYRpPcz+JPQwHs48C2i2rpphP76j8u2fhMKae7ES1NcXa  
N73meD/h+7Ull9YhEyzYNNP2IXcE9DqYqGYJEzCy7RNOBoEIaMmn7JH6aYwV  
uw89IwpHwH+ntQ/lFhtjfdFH+dZll2BT4PTllQljTPzh4z41wwjQP/lmqg4z  
wj4x9akOj0cAB7NhE5XbAFvgWp6XpESA7mOKQkHFRYxZkK8oli8CiqdOe29p  
XcTk5Ow2hEsjgHj0w0h5lD6WarNQ7dkaAdt1/izaDHPYgeVuKgNdJjhNtJq8  
VdLGxOwOTZbtiISXl+vMZSa0sGonKWUTpkg4RZz99SBbC2v3MZot4YiEPeRr  
Ch8XNbHlxDxdfYFIkFQ53kV5poFdfCK2M1cxEsY+KHelhqlhJJWpUjLC5y8P  
PF49rYbZvqvQT1KJhNSj71Wv/lHF/CZO5wTrRMLzxZlxWytV7LoAEreyiATq  
WpPLPn0VbDz02FAoOBly54YrAkmAzXFxL/GFR0JPub9RqwBga4WDefuilyHa  
QJq18w2GsTVY/tiZHAkPCjmCxH8iTHbGMeBXXiR8bc8Wq5G9gIWbhuQ/q1+E  
95JPiPv2K2KJPy4o330WCY/OCTy7WqOAZXrRjd98GQmOK2p+By0UsDvJcScz  
3kZCUmg2q/7dc1j784xX3kOR0CmbnVCjI4/xHL/z++xaJog9Xcwr7ZLDjlQ7  
pp3cjIT1PazSS9FymJiymOwJ+ijgHtRK0VeQw5QuVYTw7o6CGU7o3HfvNGaX  
UcexcTAKeGpUaLQsWezhSqfcy3NRwPyt5YFTrgzGsP1RIEApCr7nu6U128hg  
prt+7pKAKPDsqYAhMRlsY//mxyzNKEi31HxpHhOS05GVCnM2jQKZ42qeaEQK  
G3dPa+X0iwKjrYy86VFXtNEvr6llMAqEeTtM+uLFsbSQuznXQqJA7/Bq6ZiU  
OCaX/Mzlr3QUSMz8KY2MEMOisqBZazOjoGpr7w0pmRMY/3d9U+uHUSCt80yB  
VYsI5jVhju2rioI7YaQLDiEiWPOcw4m2migwY3V8Y3taBHPdDls/9TwKuJST

hSSLhbE6/ooCqx4ooPehMy7JPoYRzDh+PZiMght19o2Pio5ixdZ8PbYzUdA4  
1l+d43AUW3cQredZiAKVOCETdYmjWJEfSolci4JCAZ/piboj2Eymx0kiczQY  
bHcq8jccxpI7uwP/iURD6ofnp46m8WOWl1IqtsWi4dl/83sDRPgx6UnNnzuk  
oyHat1BJ7cUhrI/ppTHb2WgY9tt7RX6FD+NTrZIS0IgG3aX+jj+BvNi9+pwf  
yDEaCuzkvvTX8mDBWkQ+VVecBc/pEhx4ML3BPUaaHvj8ac3wrX082Nxi0nOD  
gGi4qc7o2ebHjZ2TCc2ziY+GlybahxpV92NtxTYG0cXRMNwf/N/DfVzY9TMC  
8fH3cfsfp5K4+vZi7i1DjckV0SAY+fCVbeZebM93Y3FqTTQcyxW5Vs+1FzMT  
UGe88zoaLDruWWwc3oONU8Weto5Hg4CZ1Y7sFjasTmh8/u1kNixlWHKctGTD  
kh/f0tE9E43Xw8nGakusmPS7Q9kflqNhemwqrFOCFQtg4fD+tSsGnlbj1Te  
240xRi2I7j4eA8MWRjetxnZhIz/47q6Lx8BRnXCZVsourEZD9diUdAwUjv9X  
b6iyC3Nkyzr87mwMvAsf6Gq+w4i9zjlzKRYA9mUEyP3A3Zi8RVBu486xkCp  
/dTrHboMmPXe/xK4XGNgMHDLvGc3A3bW7y3jTo8Y8Js3dI19S4+NK/Ax/PKP  
gc3zfyk5uvSYRuvT9QdxMeAl3rfEa0GH7fq89efc3Ri4lK8iKKC0iUbQcVfx  
ezHQSZ/asNK/gWr+M/h9qDwGNIny/epXN5CjU9HYVnUMODFLXhe58w+9XID+  
0tISAwqmZj0mQusofndct+FYDKQaba9nWq4ga/dyPZXf+P50m14mu1fQ2Xcd  
7aenYuDcYACzau0yGs8SfcOzGAMvmUn/UniWkcaRthefD8TC00LhNjvvi4hJ  
nvWx87FYcMtYCw8sW0An9of58hyPhcrvs/x2VxeQzvvMmRbxWIjSsjl8SGYB  
pZf1NRyWjYXuky5pM7XziOfI9ZYPEAt+pTKPPvTMIdHdYh/VrGOBRFSHUt3  
BmmNX7++YBsLRfnA7jo+jVyb2ayKHGKhQK0lfE/MNKoIm/v2zz0W/hNL6jrT  
NIX0LtT+qQyJhd/3eK5bav9B6p80to/kxULnqcD1T9TfyLGu7mV3fizk05pr  
San8Rok08djQolhACaudGf0/UKcBx+6PjbGgxL3rVjDhFyK2DHBl1MTC+WPJ  
5Phj48i+3F50sz8WZOiyTnjN/0DxyR9+3x/E/UEvEn/m4Q9U6qRVRvoUCyH7  
BureX/2Bpo5KylR/j4Vy/2wO6vR35Jf9V8FtPhYcrF9dbVv+hmliovWH00Jg

Pm/KQUR6FAmP3bH6wBUH0Wm1vQ2/vqIWrtDX+3niwNfxS0ev31e0k4stvUsw  
DoobBjhHqCMo/g6t+6V0HHBPE9Z7xz6j5LelBvcvxsFl3UnDk11DSFy643KJ  
cRzY83rvtPEaQh2Uac87pnEg00EQ+rx/CLFZypLrOPg/GFLzhLbjyh95mkP  
xSMOkocau/hYBlHmvndGlxlUCQ908BFfY9kg+ZtgyhxUMFZRj6u/R71fd7n  
458dB5FnwsK16d4jrmISxbMgDn5/pTjc9e5HWee+912piI08028jDW36UK7V  
EkGvOw6cptd4v7j0oHOvDthr98XBktcz27/SPWhIVNFP40McGOs9lWmcelF4  
5sKzYCQ090/Mzujueofyo5kH5GbigKN7aleTcRcqLDlkKsARD9X+Bl86TrWj  
5PiE+x/2xsPdb81lYsNvkZ/D360M7nj46msYUBHzFmkd6yhEliHyOXgpweH  
29BCQfDaL4l4qPo9Z/+b+gapZQ/IV2rHw4JhCK3rXCuS9lefd90PBx6RjxLv  
5lsQL/GxuohRPLj8uPGzqawFzexNmskhxcN/z3cs0Au1oJy0cxDmFA8k/V1P  
gvia0WRszg/NuHj8vZLm35J9id5f2XGOpIkeCqQPhWevNaEXKp6pDanx8M/j  
xtkUxPKotM8I5UVD9uv0gubjJrQhdDleK7b8bDre+7NDyvPEdnXRPxLUzw0  
me8IR9+eomDjl+HZLFFwojKZ/kzsU2R/SqrfoC0efE9sOjmfelozneGvnoX  
Dz/D93ME+jWg767VXSUj8fBcXZirk68enbHb5+2zEQ9SHTGUAzdrkCj3HzZe  
ugR4H3eEmE2oQTxtr0pf7EiAuYDtDSbWGrQs5TPKxpoA5s5Em9LQJ6hurceg  
hBcfN+X5e921Gillpkt/PpsAxGhebJnPSiSp5tgerZgArwfah110VyKBlQu0  
YigBxNYcEhxXH6Mty+mbAeoJQOnZOlGw+Xg1ndBj30tMgNC7qFaw+BFSa9o9  
pe6dAE5skiQF7gok5/stYcovARAx9IZWdTkSEa0/Rg1KgEvv9m0esRztSnW+  
NBqRAN8wydCZ3AeozexNe3B6Agzo3J28cbIM6c7G3ntYlgCu4/wx85mlS0mW  
pbrpwwSQkij/sqZSiiRN5L5tVCbAVAQb866lEst29MdBnYYEeJkKPCNgWYK6  
41USx9oSgOTTOrN6phgZC9I58Y4ngIqCvGwz9x30kpRoyDmZAFT5X3EXem4j  
GeoerCaZBlhtlAl4nHIbcTAfZZ9fSgDfkXbGQMbbqH1euaqNMREqKr/A9o5b  
SLk1ZjtQJBGUpGuf0sSK0KNt1omrYolQpsgg3PmjEAkqZvVdkUqE2V85rGv+

hWij4s5dgzOJUFUX7vyzoADV5bbqHldPBOIAObskhptIxp0p94N9ImxFct3c  
xX4dFRZnRHU64+MeBwd1qvMQx7cDbq/c8f0NV5/3WeahKZMTqMlvERS2//nd  
eJyLSjHtsbjYRBg/+eCVj0s0OrIvRebMnUTwvZrzU5+dhjL09/FJlCZCvdp2  
j/vrLLSVcGPH0QeJkK73i5AUmYU+b5R9YKtOhN7nxe0VK1SU094ZOtacCAuf  
/VeI8xTE2cDxlvojEe5HXiZZcGaiNo/RZfVfiRB6qymncBivpI9VCq90JgKT  
9VRfdjEZLaSaRFouJIK270ypTCCjD5fz5UXok4BvvjSiazUd5TOKF9cIjkHi  
hSldVaFUZNLwr99ZKAn2zOhvFnWmIA7PLvpDokkQiU184gtKQZEfvawipJKA  
x0hKy7QvGV0pq92vpZQE0jsy5jKpSUjcSD1myDwJDqsNCuhrJKAfjAcep1gl  
ga/bMZiiS0D5Db9HLtgmQeMVCSm/xnjEIzyqeMs5CSQI79JPnY1H88t9866B  
SfCAnjWWWS401eXb2GxkJcF5uf+EFk1ikLeRbHpFbhL06SkYUQRikPiunY02  
+UlahpSQn/wZjfi9Sw603k4CVvY/3i+ColGEyKx3WmUSdAdbFb0tjklav0Mu  
HO5JAv1Aj64HQpEoXHir7sj7JOAd8vh45XsEemITKSf0MQncN1DUUGQEEh6K  
IRAZTQKfX3qef1+GI/r2NF6JuSSgHN95jkQMq41lhUtn9yTDq75GyZ7qYLT4  
66j3uf3JIJ8p0c/iGIwkh09MKRxMhp4fLdOXDwaj6/mlP5SOJAozmqarXuQ1  
FJj2uFdFJhmIE4rpvZZBSNazufyiYTIoj1u1lqkHINcydTFDYjKluAyoMTAF  
oP9+vbljREqG3sHaCPTWH+2x6bxBtEkGqSupaxaG/mjacCDJwisZysSFG944  
+6FS2V80juRkiPYflZd+4YO+erh8c8pKBpZ/si6Q5oN4yv5YuuQmw8yb/ZaM  
lj4o7tgcwb0oGWYrztIV/vNGdvvXlH0eJYPE4mvagIo3ElhmEQzvwfcbchT7  
OeKJLHatjbq/T4bFV7egn+yjcnl+3b70MRkGBsXVPqp6li75ZjGF0WTYwys3  
w1PugZiDQs4szibDsb1PR5dSrqLFtT96rpwpEPm3oIMY6IZkWYY5zfelwHLu  
jfEX59yQJ19bn+aBFAghbgns+ueKJhXvkeEQOp4DmVpk4X7QrGg2xtB+VTgHB  
qv/q+K+7oM7NzhDTiylgbtSc7jbrhFg4niJ14xSQIPsu2T9zQppqC9+jlTFPA  
o9T2BleqE3qF4hL2WqfAH5Py6UgJJ1QXcYHaeTUFJhU3Sh18HNEd+or7Kmkp

ICLRVn5PwAF935t/9VRmCgjsD4stWrJHh4WSZY7QUqDWQCT6WLC9uq7iWLOZ  
nwJPRGLm3kTAl3KM4Ku6BylgKfg51WbqCgphzBiS7kyBE13KlyM/2SEG8uvR  
oXcpwMkwSS19ZoeS+bZ+xfangKGo0c8zRXYo9+TV5eHhFNANSdgKdrRDNea6  
+xImUiCPpflP6ootmi9n0v+6KxWE0i/QKsRtUdA5JjMkgoiCVJmSVy2iK45  
4NIZjlTYvqGdVrlugzg+/nRJ4U4Fy7M5vNMdNkiSoSvEXjgVHq5GsE552yAn  
08imDOVUKOVLpVexFrNjNa+UVRPhT6ThQPbnpdRgNts90+tVBh9pLDxX0sy  
io20/nLeMBV+0qVbdGxYo1v3ldZ/WadCSOHSkZeu1ujL1uppCE0FrXjpyzWW  
Vsg+Seb8n4hU+Jt8z25cyQpN7XNWYy5JhYzr6QkRAIZo/cSg4VRyKswc2NP8  
46slOkh4cjU3LxUEo2RmzrhYlkKjd8lcTSp8rw7zF0u7hEj15huTDalw35iX  
m9n7ErLuUDb6+TwVmK5qD+qYXEKus3v/Db10hSQDHdZVwUsoWr7yYvOHVIgk  
MIr11Figx28WlmjLqVBA27/ksWKOaoaGdcjrQXA2NVec4Zs5avzzqjB5KxU0  
vl64Nd5ujto4qdoRu9LgQ9+7woJcCzRqdvqmM08aNlyfyrujZ444f/uqnT+b  
BvuDuSobqkho//qlvDOKaaAnJDTw+j8S4mNTmzmJ0iA3e00ZF5mERGX25wpr  
pIHkscOHnK6SEaqq/sNumgZy90Wuz4iT0FXmJcqofxqIYXx2Xx6ZIR++L7+G  
r6XBJqfdY8otMxQk2ao0EJYGtSfnK0KzzFCsIW38bRy+virj7J8gM5Sfe0ax  
ipYGW1xjvMJqZqjRMC3uCdpsGilrST8wxTxPSkJVqpPA/Mf5teiP5oiV+Wh  
fX8b06DPkMa+s9sUsVgoadi0pAFvK0eFZ70p0klhKFPsTwNNxby5L5mmqG06  
3W92Lg3eZ/onvtAyRQeDm9iLF9NAYNX9tjCYIuddC8WWq2lQ3p79tVjeFDEd  
Nhl6u50G1bQd0vTHTZGG4SF0hyMdiie78fxmiloqS5jMjdPBd/9v5vYOE7Qf  
GyrilEmHtwss/zW1mCD7DhbF16fTwUJXX+XtMx00Y+yq++nz6WDwkZi455EJ  
UuGW62XXSYdkK4+QAJoJehnYdP2VUzrQll61Xr9igvbsXDh9zS0dlpWFhB9a  
mSAb8rGuk57pcPyZrOSAmQmiuxe/nR+QDkflU46a6pkgGNazD4xLh1hP/nXx  
syboudKQlOTtdNCxfix+iB2372YAR09xOjCUnl+9zGyCXdf3zfreT4eN2biQ

6h0miOf5xUdPH6fD6fpRSfl6EV3FWmR1m9Jh7q7FJvsEEb0qtN0325wOLB7k  
kg9jRHSQbvsv5U06mN6mvHo4SkQtTQpPhrvTYTslWo76kYj4VR7Ku35Jh5G+  
p66Cb4nI55beQY5v6fAxim7LpZWI2hgmVx+PpcMSi+BA60si8msWblj7kw57  
vrucq2ggog6160pJ6+nAfXTujHI5ER25Ky8gtZUOXoIlOhz3iSiAcWCzhz4D  
RuxUA/4UE5HQa84XB3dngNvK438DRUQUrBmnXHogA6idXEJuNCLqKRES0juU  
Ae8iCg3rKEQkytzEMCeYARy/BFy4yUTU17beLC+aAezMAcrbyUQkpuOl8UYu  
A8z3YgvkKCIKv89+301cBix/29lvGUF71nKmDiVMiC+v83rXBgRRXb8bDNV  
zYAVg950wWtE9FHvku64UQY4SZBdSryJSLp8VSLZJAPGIhey5jyJKJY9m03a  
PAPU7S8bansQkUx3T5e/TQYcMdpWF3MjokQDDUNGzww4vU+l1NqBiEYe/pC5  
55MBQQnPJreuEJHcnqi9+gEZYELxaS62I6LRnqd9WWEZeD3gq8JuQ0TyxqdM  
hFMzQJwHNZ+5RERsihExB8gZ8OSMe9G6Of790a7HLFkZsBDhHd9Gwvebd+aY  
v5EBT1kWgyNMichyqEZprDADbOJdyc4mRHTq5U63wdsZMHPrfqMFkYiGyUVv  
npXh55ULdrIwJqKKoJmlRw8zIP0nw7STERHF2CgJ36nKANVyzZxwQyKSIPkY  
mfw0AxRXV5zeXCQiuoOiD8NeZEBesVtTZ+IBrZ9v3g1Z4A0g9eSHM7h7zgV  
zToy4Ett1qU3ukRkXGvlrPMuA4YsC50FcT5eWJZ9oT8DrBl1a8J1iGgjf1F  
ZjAD1i/u1/qtjcfbQ/PvsU8ZoDAYePQSzndMaUcPfm2Ae+cX1Ae1iCgl/TBg  
+ZEBH3np6i1x1hM9Fb45ngEETsHwP5pEdJQj4sHcZAaU1LflxuC8vNQ5/GMm  
A+xxqQtIEcG7/wrd7cCED9t6u+fxOg4gKWp3l25czQEXgL1sszj7lNQ7P1jMg  
+IVFkTLOmrSdWY+2cHtlHG8w45yOxL4Z0ZPBfmc23ZA6bo+sYZDuDjIc+dzQ  
X4mznWggpzojGYRMjA5m48y6zOUuwU6Gb+8HR6Jwrm6taNvLTQbeuy79jP/f  
v37gMusBMliHjD9GOCeWbyzv5CWDB1+VcNT/7fnvWPoWHxkGDuud7MLZkqYj  
ssqPry8mPSCEn0cjbtxXpAM3/sHeKNxlgNljfw5QoZbz17Q/d8ffN4vJseE  
yDAb45xmhfL0WE8akSYDGYtes1DOM+R2Hk/ipLBmX/i7mXc38N6co96T5Ch



Qqzh3CzOFXLRly2SZOAangqVwOOXe+Ke/3NpMmjXaZ75iHM0fw9bnQwZpl6+  
LUvXlyLTnYLnY+Tlcl/rzLeDuF5gVa3vzkyfGXhLznCWxzKzaXgHBmeTHAr  
tBsQ0XZ/fU6mEhmCGQze3cL1V3rbZDFQjQyfp10Wbcf1W0v8r9xAgwxSF70m  
PuL6fs047XhciwzkD9O6c2ZENOUUO/RBlwxrArHr5yzw+EtWPT9DwPf/c7fu  
8GUiul69J+mvLRluR0qfN3chonsOliodV8jAKCFecNeViOp4Sv/dciBDu4IW  
ygJ+fweDMA9jFzJE7RzUSMPv9/4LHoTHXmS4UXHvwEtfkpr7RDwjCBDgH9M  
8yqeP/IDDgxqRJFhT4BkkTyeXx4cv0IWjCEDh9ltLr9IXG9J6wzd8WQ4Rfn5  
byyaiHZdFPstmU4GvoHj1f8lEBH3tt9/08lk6Ggq29eWSETCj5osPmfi/LLq  
T59MIiJVLlJXCo0MMs9X+I6l4vnqQ3zlZD4ZrnYxXLbC819GQp/bqwlynBbm  
9LqcievnpnKDI9SIyWDzNErLE82Xj9Sc52nfl0BO9XKGWhednXXqjo8VkeDys  
JS6D59fhDT2WtRlydPdvJnFnE9Ga9VhoaRkZiNaRCl05RMS8R+ZsZDkZxIte  
iRfm4u/Hy5BZs4dksOsjqLrmEdHZY/vsmKrIsPJVX+rPdSJSf2996Gs1Pv+4  
ZFHRSIixt1/X1NDhn3yamEX83E9/1LWdGzA45/AVk+5ievjs00JQyOu9zXK  
olwBEXH2JjE5PCfDTymdK104j7SWO9k3kWEpY63tUiHu34beN1dekSEo2Xni  
K87BD5eOX2khg1aidal5/n5o3eFNtHtNBli85dKGM0/ehd+2bWRQVNng0lPyP  
iH6m2WrZtpOB85UcQxz01dFxpTadZMhf26Pch3N04D1mm24y10mY9+67RUSG  
7l30l3vw9Y4MBGjjLGg732bdRwb2n7pLPjg/1VFIsvqAx+uXZmoRziS5KG3L  
YTIw3E+svo6zqNjde5c+k+GvFe13DM5LAm93Xxohg0a0duplnFu4pl0sRskw  
GOV+RQpnCtPedvPvZih803pqGrfHZkNO3HwM18tz/qcFOJ+cJyWTxvHxnnPN  
yjhv/QydNPtNhlSXb+wf8PN2DhfpmE3i+WXXi/UlnK+/a7lvOkUG+k9L13px  
f7m0/GYxnSGD6rPzt87hvKtCpo04QAbWz84dP/F4vL9FICAu4t/zPXgsifOt  
nKAUwjIZqHkG513w+GFRTbrG62Q42xoe0YzHmyNgrMxogwwCih5W33A9fHZl  
ZjPalOO+dJzIEq6XIKJhpdFDjsjdmW/YwvWloe0nabAzE1623C9bxPXHjXJT

L+7KBNVl465RXJ+Vx0f19FkyYfCv/OQNXL+R/DvL9dgy4YXvR2Y3XN8Ge0+w  
63Fkgrb7yUIZXP9T655dOlyZ8Fe67VphGu7v7m19Lb5MsOg5+IEdv0+Lr45V  
aPJnww4/o/9R4omouVaTQ1MwEzr1Z3w44nD//pfRrS6UCV+Ni9z+4PVCnt9h  
A1XxTDA9NVCsFIK/v4cwQ6SYCbBTR5p03fH3ryuh75BSJlJG4a74fnjb3gP  
ce1Cjihzb1vFOuP36butebVyJmyLhD79z56ISu7H2olrZ8KJTrPoVEsiUIFs  
9+MhZYLp45phaTx/Bpmb5M34Z0I61+EMVmEicmctONQZmAmnuFmd3I4S0eVn  
4zfvXcuENv8QqdeCuP+Obt2yD8uEvZNJL9x5iWjfxPWY4dhM+PLuZUoEx//f  
89Fnr6m4vWLCSoMrBPQjx+17weNMuGJwePvlWwIaPu3K7FuVcVFaXkkbrwmo  
552ztOaTTNi00bJTbCGgRibH4Nm6TJggGoi+fE5A2YE2XNCUCWUsDEw7qglI  
x8xE5Vs3bs9zrbu5hQQefwnOT3oy4XPEk1viNwIIPsM4PakvE97+rUhquU5A  
wm8Mhk99w001331+bzYBbZ7V8Yn+kglBn+4q8qQR0GKfVq7pV5yXXlJnkwlo  
0kPzufi3TNiXOn2sP5GAPhSrsfSPZclCVW5PQYwBPelBbh2byoSAno7jnGEE  
VFx5oW1lOhMsM8u1VEII6OZFpZmO2Uzlyz06E3WNglJlJFRT9/mbCxkjU9PEA  
AooUomejtZQJmT3dw+l+BBT4/Gw8/woez6uevjt8Cch++XRfy3omhLJf7eLx  
liALiuxq7kYmoGZxoRoPAjKSPiV4dSsTDiRtatlfjSDkKO3KzUCB6Xu3T8+4  
EpAcgxR5YgcFLtUOJre7EJB4gUTNM0YKvFD4PlzjTEAHPpxgcNxNAS0GpdQm  
RwLi8DI+QpGVAiPrfyJHHAhoJ4foRQ52Cuh0naax47x+T9jvOwcFWvqauS7a  
E9Cc+rHrNXsoEG0vp1p0hYDGvx1tSuaiQNOOnMK+dOH8JOzJuvZ8ClZnMY8F2  
BPSe9zDbaR4KZH7N/7UD5/YnArJMBymQLfinpdCWgJqM+EmfeCmwUnK79SLO  
tdN84Q8P4ed5H3B6L84VSbx3YgQo8GhrP+mXDQHdETnYbnaYakHh0mG9OGda  
cfPQHaPA4ljW7Hecw2lcdqWiFDjSJ/lRE58v5z8hfecEfp6nL3Rv4TxJbPpX  
KE6B1f4QMx7cniK5nLYbkhSgSdTM/4ezyX4PWo40BdIvZr0D/Dwsi2p2VBkK  
RJ4OHlrAuan/0MkMWQrWuT/dU4f7I6Bq4V+yHAXYkssCyLi/Jklv2+LPUoDx

cAFbKO7f7z5FtOhzFKhuHO8PdiKgHONAU3BFCrQtfuxKxePBwCWy4Y8oMBrM  
fHkSj1/d/L82b6CAytTU6hl3AvLo7aNdVaHAG/S2PQuP9xA58qSDBm5/V+2h  
VFwf6V5mGzZaFGCQ9r4p7ENAAobSby11KDDzxMuyB9fTI87PdsSLFBCNJefY  
BhKQ42zlsUNDCvROm/Fo4vo89C5pQ9eYARYvqwYxXL/x6fLZqqb4/rsDj7tF  
EJCSB8cVjESB6Jy4uptRBLsg//PkeQsKCHwKyPwRQ0BW7NS3stYUEH5rcOQe  
fl/kUmc2jjpSoPjk9odDVNzfbq1vBZwp8NdMs/M3jYAKdfOzeV0pwN3Msf9t  
Lu5fVh2ZvR4UKCh1KWouIKBvSXev0AVQYLzQt7eoDL//LqEyG4EUONA9FMH8  
kID0tAmbK9cocKPzUkpMJe4vZvqc2TAKmEXRv6iqx/2RYNk+Eof7q27l2UYb  
7g+n0znDCRSOjDkEb3fietZgsf+QRAE/06gC7l4CcthVt9mVRoG9lYrHQofw  
88bt0/WMRgH2oQpV2T8ENBHdnnPjLgUCLzfuVuPC38vDr+P9SyhwOu44m/AB  
vN5pf0lvcI8ClINSzNz8eL2xXEFYUU6B5y1m82KiRPTcpYTrZoCb4csiw+f  
JyKqYWyCYjMFyk5WpZ7H87XHdETA/lYKSKtL3pfA6z2t5BCHmde4fxsi+yT9  
8Pe12Uf1VjsFnm2xatnh9ZyzvO327j4K7Lr+ZSwPf+8uCKLAoVH8fhqtf1B6  
h9dHTxUcq77j990XfAx9IKIFszMmaWMU8B9XSTX8gte3mZKnIX9TwGdDr6b0  
DxFxMR6aLZ2lQGfG8RTR3Sbo158Vx6AtCjClxYiZa5qgzPrHpgf4qaB1+y2W  
2mOCxK/HTR0UpIJUxn/mzsMmqCXYPJrvCBV8CA2vjcdM0Op5+goBYSp8ft+0  
eHHVBNk8N2QUlqRCx9tbPB1HTNHJ5tkqGSUqjM+9Etnla4rabdrylqplT2  
0luEmSK72Jyvp4EKLYWueeUJpihbHWOVV6NCFb+BiWG+Kdp6k253QY8Kh7Zt  
A1xbTVFXp9ReHUsqTA/X7hXhMU005fQlutZUoK7lyjEdMUN06QNK+jZUoPe8  
GDIsZobkDMKcDe2psNKl1W14wQzl93a+MHWnwojrBt2VK2bobGWRCcmDCsoX  
6eur3c1QD8Xvj7kXFXy4b2vN+ZuhnUT+A1Z+VHCvWNM5mmiG3D64eVwJpYIX  
zUnfqAwfr8V2OoRTwVyx9vzHKjNUkLPvumMkFdCSci1yoxnqlz1tdYmlQiP/  
1Xt1nWZI8ROLgFcqFUSVT9EJTJmh909HKr3TqXD1zkJrwV8z5JFfqeVLpoL6

5nLHv3UzdMvKwi8giwrXtocXVHeT007Rex2h+VSIIWYK/T1GQsX3TzP6F1Ah  
Vcsk86A4Can4P0NXi6iQ3vA1Y58MCYWy9D62ukOFPP3wtvjzJMQ7YPHHpJgK  
lknlWptAQjWFY8IXS3H7AofG1DVIaE5uNQc9oAL3batNbUMSStu06j1bQQXr  
9Z4X00xISLydlfXkIyo0KQSKp5qTkP3lw+GHq6nw6S4lltGOhOjF79UeqMHj  
NS3UsOhAQgWLsvOcdVSIMuIXfuhCQh+TNOzpGqnQWxx5NNqLhPyJPTdXn+H+  
r9z1L9eXhLgOWwzOvcD1wilJCwwgoYcTP/ZMvMTjob/FJXCNhPSqr+p8a6bC  
l+XknMQQEpoIX4kZaqVC7fWv6vVhJBSvHfWs9w0V3rfuVq6IICGh/awrb99S  
IZDxwAPHKBJ6MZIl86oDX398//1v0SRkeU/QtaGLClDw9lgLxpLQqm/p7cp3  
VJBtOfjnUBwJ0ZDsl/u9VMgeVvAbwll2dyPP7X58/TdR/KbxJPSuX93wxgAV  
pHm3dmXi7F7wLok6SIXflxpNk3De7WLenDJEBQ2BdmmEc/HpHxsxn/B4TcPv  
VuDrqW65nw39QoVnQ5adw/j+o23Lnn5f8fv0xUzzRQwJhVEj77l/w/UhKFFo  
hdvLZ83yw/4HFZYKM6Wri0mo9kQWv9VPKtTM5h58FU5CxL8Cpia/qPD3+sXI  
+FASmn9WkqE/QYUF6aZEumASSk889Vb9Dz7/3D/iyUASkiA8ZUDTVMA02Jm5  
/EioTUBd6ewsHv+xHa0leHwcfnf7S89ToaFwqmLWnYQYqkgPRf/i93/XwO/f  
ziRUGPb9t+ASFSLvttMo9iSkepOUudGCFCidYPn38cxmPN9fyJc41Kjx8uW/g  
rwUe7y8RNKZ/VDA1jy6/h+uJq3T3u+0NKtyrg/IbeiRU4UNlXt2iApgxa2i  
REK6FwRU5uiy4MbXkU+HJUnoN1NjyG+GLFB4yuhzhh+Pn2y37VuWLNBRdM+o  
HzFDagn80il8WXD/wbDxnatmaBdnR5ItfxZ83yqaUrU1Q23Z137KC2YBKX+9  
mc3EDOkVf8gf05oFFW69sQfx/EB0JbMisSxoLrCpZOc0Q3Y7GCfm5LPgALtD  
1/d6UyScUqX2RiELNsuDbw8/NEXjXHZFN89nweUkH52/d02Rq9ALMx0sC3aL  
pSrFUUyRt/K117c1sqB1/hWD+FVTFBkxfdvUJAuID510cJ0wRSpM+duSZllw  
00F8x+XhU7QzQ+fSDvMsKLAqzPh9wBQIFpRwPbLMgtpHNEMxZlOU8cw2ard9  
Fnw91nN+eMIEFfwbsG70yQI+yfuHPjzG829MbAPFLwuemZhyXigzQUKsp3lc

ArKA4z977/o7JqiYj9zFHZwFTadmiuZyTFC5go6SZ1QWCBa/iTSPMEGNgc95  
hchZ8GIq1mHCyARdUFXnP0LJgoyb9ap8eiboOUenoGBWFjxIzjl7WcMENd0d  
OsaXi5/vXevPE+dNUGv/ohRXURYcqfmU80jEBHWfIFBheJQFX4yljp/awvup  
f4/V6CrX8y4l96SvEVHP630aW1V4PIvYTTYXiajPSkNvvTYL6AzpudmmiGgw  
xdZ04UUW6HbxB04OE9HorxzX7++yQG9jbSX4KRHZVgleHe3Fx5My6zprieh7  
+F3Pkf4s80TTnZSoJqIx7iq/4cEsWEu4/XpvORFNqHaH933NgnpNexd/vB9d  
KNxJfTWbBc4H/iW74/2ar1sKrWkej7dq/quQGLyf08uV+/xvFoh7WNLT8Pd4  
uevwzYYVfH/6+vqxYCL690+xpHI7CybOMhj89iSinSTvp7c4aZCS90/d7hIR  
3R/lHw3fS4OXpV+rBczx/t6lbeelfTSIqq+gHzUlovzgwxf3HaBB8ey8+jVj  
IpK72TUaI0iD54Las1v//39M5BqjzREahN5/2TyvifenFcLiSkI06Debzvmj  
jvffL0J8F0VoYHZcxXBRmYgcvovtcpCiwdxuwUALRbyfdBsQVz5Jgydc7i/i  
zuH97t9IA4FTNBC10iNWdxavN3Z+zB2QowHHGwEf2dNEIH08XkJDiQanL0cb  
hEkS0Wv374bHdWlgo+7w0Pgl3i8upfnv0KfBj28XJEbw/pArXOH614s0uLzU  
t89dglisM8g/cozx8Zh7WRI8RLTyGAUwW9DgupG2/Op+ljqxcv3GhDMNYlQt  
uZxYiKg7QqOp1ZUG9QUzT0R2E5Ef88LYf+408A/hdf/NRERNvNrSFI40EGL8  
eC2YkYhISitN7YE0+OR+eKOfjoiSogjjZfE0sDy8/5HvKgHJLIZXhCfSQLFZ  
IzsW70c/O/IEGiXTYGzZ9d/1ZQKS1htiWkmjgcDgz7sfFwmoj+eymAqNBmfj  
7jlkzhMQ/wNX94+3aZDZPGmhi9eDrYKdcmV3aUBpT3JPnMTr80ypzbASGpxb  
eczWZgLvDwLm0o6V0UCmRY1e+zdeXyoHPPSopMEgxnjC7ifez3yIWtj5kgYB  
psFHVr8SkJn2j4bBVzQI343iTXCma1SLud9Cgz3TojFPRgjl+D+m/YZtNEjU  
4kwI+0JAK25pZ268o8Hwly6ck5/w/mVkJZvNqLw3OV2jn3B7G+2Mjw9fQT4Ns  
6f01fDjnn91nNv6Bhvc7gje58PoW6POCTo38r+K6jWq6DMMALrkhJaJQxDfE  
DuPVbdkJShEaTzd2ENKz8PDnTZiCIDNew+QDEBBz6cFQEmr3X0AIjUwUGhIC

woDI8VKATbApeghIB4kelUqZWa67j78Pz5frfj5clwb26fNnJdeo3+7/GwQz  
Gmi2awm6aORY5VzC89dmKQ/p5Nfh5NsjbtWFJg1kt8D69F84dhgbuofuaUCn  
G07rnKC8pC3PdJ7VgCDh5u1PDBwL+u1OVty/Gsi9GmF5hfzVcc+pSAv9J5uS  
tNafOZYr5LvDliOkm+Rguswxx+miPL+VCNHZAcUJY//vt4556SoE7bei2n+o  
r89tW4zxWY2g3iTz/5Lc3rlng/OLCJAjG/99hGNxldv+EDgjNKRa5ZT/RPmH  
H9xtcUFInhcOvUUWW3oNT9wQ7oRouxZ+pP6f4a+974HwdFhSjifXhK7NvC5B  
6H9pZ6wv7YVfzXOmc0EiBa3nZI6DHNuidY8+LUP47OGhPuMAx7Sp8fp6hnDp  
VoFDFblkfOyUZjPCeZsWkTtZ1NSW+PFWhBGf1LYAPe35xAOTkfElrx1s9Cz7  
gWOjrpwuQLBRZdljCNvGH3UEbYL4YpXbLAv2TowDWXJCF1nT7gP9nPsjMN2  
zicdoTnZxtaWfHfAdexJpKjElP2D9j6O5QUW7hr/CKEiU9xZQbZuvvHgbBGC  
rHRGmEV2/4J3UKjoPVcs9ibHJNvH9ZYiWOU3zVT3UI7PBLcO8AgDp4b3Yg/H  
bpr6hW/WIOxx9zsZR348WrzOVldg9Kjf6EKW1pizwk4jzKKr6hsd7bOae+aV  
FxByk9JmI7s5dt6t0bmnE0Elnow4QR4VKlm2DkG/ae/6DLLV1Wm14RJC3Qvp  
8lXkzJwJ0804Qkn91L6ULtqfscf8thgRnL93GJSRTzJ51Nlkwvb5ogYnstF2  
qGrHLlIkMeKQgfZeSGOXl9tDuk/pwsl75Ncx6o3gvxCcWLTSleyvmh+iMCMc  
OdO0e6mT7q/wSKxexkNs5oXgZrJxY0zhdRsePHNf3aokt675tOple3JSYKQn  
uXyhpz1qLQ9HDMtFpg6OZegXJypFPFSkfqdqlofXeS8axDwo+z54u4DslbFD  
brU/D6w4yTuCvCzyqFQexEOhr1ORmDwl7Q8v28yDynrk0XNknF6nXsHxIBcr  
K9raOfbhRUV9aAIPj+NTzEjf731+rEedwkPy3fLa98mSLP2N/gwe1Ff+9Agl  
rwgzL1n28/CuoFbiRf4PqP49lA==

"}],

{RGBColor[0.880722, 0.611041, 0.142051], AbsoluteThickness[1.6], Opacity[1.],  
LineBox[CompressedData["

1:eJwV1Xk4Ff0bBnBkCUIJVJYSRQhJyX7bpZR9J8tBoewqS1nPmaHFknNSUumN  
xItUJFR6W1RKINZjKZSIUFmPpd/8/phrrs81f8w1z3Pf85XzC7MP40Hi4uql  
rv/f9f+8/xUhymXEZdjuf/G0tVH36f6qH7GdRpwqru2Tmko43iwTVR7706iZ  
rtnTsHgHWvt0HE/EzhsZma0PvXHbElO/n5olxIpg3Iy5R0DcBcKcpQbRsTLg  
F+1nrPoSAGl3Gtdnm7VoLx5smpAMgmQn+8ulnHUYSRpdIm29H5sMNK8KKBK9H  
Q8jZm7pXgmEzz1bpWLURZ3/ZDrDlw5CXqKkTHrsZr2TvVY/URKFwc+c5eT81  
OAAuqIzYGo3iTsbCOxt1sC9Kf9GtiAa7cKS7MEcDX0XkOmsKYzCyYHqFL1gT  
/meY4uMhhyF2f2TTm1XbkSF4uX1TQxwkJB99Kj+1Hf0uJzkFa+MhFZafSefV  
ht0ZFaXryfFQWGv2U2dMG5ZtGaVXjROw/Xh+1aWnOrB/+Lq18EYi3I3MtA/F  
GuCMUuhQIXIS1BjKhVsmDRCvvf9YllMSeFqX8U3EGEL5H4XPj48nocy7sz0+  
xgj/1qy202tPwoKhXq3ZXaDzSsn9nLBkDPhVbG/kAP9IVff45iWjnS4nu1jX  
GE7fwkXz7yaj5JVA+os6Y0TlM1WsFqXA1vutvX2dCXqlBMP7TqZAN8WSX2vG  
BD1M51a1yhQoFN+tW6ljinKct+hXawpmlf5a9/GOKWS/0NMGRFNRIHhwZN8d  
M6Ce7thKpmK8gD/jYK0Fatk35wSC0tD14KjB3ikLCN3pUKhOSkNz348xDW1L  
sIqjA8by03BB9Y3LeI0lfhUf1FB/kQaLhosb4mus4FGoONqtlA6NHrGPnpNW  
qHdKfedoll41vPQTht3Ij1mefEBp3SM7gr9w12zEwvMT4pHktJx9v00JuK2  
NfQ40Z2729OR8rcsOnjCGsOnyjb396cjVH6t0u5tuzDL5XxXcSYdxiF8p0Vv  
70KxOvflKlk6hjhtnsxbu9G4+03NrwA69NaETF+5uQc3g6yiN32j49HXmLGd  
o3tQXl0/MfGHjt1ISQOjynvhFsrfs+dmwFuf+UGvaC+ehcTIzkgxYFzpwz5g  
ZYt2d65vWnsYoK8I/KAfalvIqA05uu4MPD8c8IY0zRaCSpNtQoEM2C025fZ9  
W8wlSNalJDJAa8ts4Na2Q+HI98nKawxc25Z9562jHdaos3hbjLwM595qyTS  
DpKMOB73RgZi/S6X21TYwXh6LMGijQHGN5qC/A32EG3m/c6ZZOD6yq8JW8Qd  
wDbmt3TQJTBy9PsRXk0H5A9dGxEwIbC160f0+700uHm0viNvj4GG4qnQxEwH

HJM46m3kSuCltojXMx5HTH5ywPsoAmIFYm4F6xyx1jLqmX8cAWeuVU5hho4o  
1jiT8TKJQFfzepuVcY7o0/f6su5JAmNuOwx8fzlikNxpfxiHgNY9Ax0tUSf8  
OKkmK3SdwNH1ptsENjtBd3jPvwcrCfAM22z+d78TLKaQyz/UEViR4C8z0+2E  
SeulPNYvCb27F/dMu+EYdWVz11tBArMDq28KOWM+r75f0d3BBREjoqYuzjj  
QMCPA+NdBLYXnprPeuUMdVZKzOglgbKi31qvhp0hfuYi//nfBNaVOIcKC7qg  
go9zUG2SgHCV7Od0UxfouPFMiMwT6GmqBN3xwUdb4IN7giScHoiNlbb4YKy  
x6d6ry8h8fx5rOLEbxesyJn4jyFK4vYbQ2bYZlfQfN7RuFeSyOh/FUUrCsXQ  
RhONOVkSfwc1yy7fdwVrLrXUSo5E9AjzaxfbFcLvpE4ny5PYN+Vt5ybpBvKh  
QHGDlOm3sw8JppYb7v644163iYQ11+KDN3ZumLaKSylWiaElOKq254Qbvj/+  
vsVanUSpiENgZqkb3Et89Li3kJAVq73Q/MQNopd23y7WJCEodXyJKbc7LITn  
sBu3kTi2ttc0SdYd/CenOeraJMbLLeMb9dzxTWYgJHsHiS5V0SHtWHeo9cUr  
yuuRcNgSJReT6w7FTyq9Dvokmre9d62uckedQOKbaAMShrp6WaMv3aFqM6FB  
NyRx0/DiU9Vhd5y15WwljEgomS76e2CxB1qaDZfHg0ShZdD2kg0esHM/OeNt  
TIKwVb8q5+MBlvKHfzkmJOYdc9neiR6YWy39udqURKTb1IqCc5RTZzo8zUgM  
eHns+lrgUGIt05T9vK7nyLR4QGJTcum6OYk2gPl7zr89sBb8exjAhYkrEIY  
v7JEPRHL1mXGUW4MG1Z6peqJva43DvVQ1oze6yNs7QIN6UptHUsSJUdusqyC  
PJFX4SGdTlk6Ub11Pc0TfHFZFo8o5yTH8/932RM3aEo9k5QF6N0GXPC98dhx  
QUzGikRChmmMAdsT4Ro/F2tT/n2qpDxuxhPdna3DZpSDcoX7aiW8YGKa3G9B  
mc0Kk5rY6oVHFuy1BpTtCt7Ya9p5gfmq/pEi5SeXtDPCDnmh9wFnnp+y/tXz  
TeWZXrhcETjxiXr/jdK/04PXKct4tl+hvLHCX0PxiRcWXi6p86VcUP00iNbr  
BYmzCS/FKS+vVbl4mcsbu8IrtzZS30+vP/2uS8YbC6aloh6UR2cPxzMNvDHp  
I/Wxj5qnq77Puj1e3hg9MjDrR7kpweoxX6l37s4tPvSWmr9yo0ZwY4E3VGpj  
8nQp586vEo1p8IaYtuKOPGp/cwbct1TZ3uBYi6T1Ufttvc2f15qHwSV3zb5



Uvvf8beuyEFvH7YqSC7KovJRZFRkKeyxD4PiPFk3qfxEP4jMjju3Dw7XFqt8  
pvk25AuZU77EB5V6gXVVOiTAvUAjpH0wn6ZYdpLKb4xcpDZN1QedTHE5Xyrf  
Xb7ubKndPlQeLsj90KLM9VV5Y2amD5oKXNSYVH++8VycDjzvg9Nn4znKaiTW  
yK94YVLmA59uMY9aVRJp/rNhnOc+OLfluU8t1Ufnvhd1B4R8UcJ3450L1d8M  
XpwwX+MLk6Kg2+VUv+8r3PKWU/bFurwZKc5aKv8BBYs+7vRFolDrxDFpErP9  
oTZWpC/KrG35taj/xaXvll82LvbDNn7ysB8f1X+Bljs8q/xwerrg7O5F5P/P  
jfQuRT+En43s0+Cm+rC/S5lp6YfqHIGHgTkC5oMV0XwMP+zibhsSHycwNLR3  
cR+fP+KDZ28d/kLAYnxwuErcHy7umq3a3QSK5lNbE+X9odYU9esPm4DHSjtM  
SWN/rMqqyvD5QKBl27oNuxL8wYnpu7WklUBF0phx9W9/mG42bW+oJxApkR2f  
1E1D59bKK29yCHCM20ek6wKhkPfbXJo6bzlk2elX6oOh0Wxx9dt+Brb9qSMi  
yg6hQqCWaDhDR8AScqhJJQI9us/O579OR3jX9EDEpiioPrHLUOFOR1jHhiVm  
fdG4zkkYzDNPQ0Krfn/d+1h40G17qnJT8YxgMd+1HcG1hlMFAR9TIBRUGbry  
ehz2rdflebAlBZm8wlKzpQn4VH+sNiclGWuu2h5Pu3QM9ScWahbYSdhzexPv  
Wd0kBF+YsZawSkLlVItW045k2PU1uz90PY6MlleHZzekoMe05eRZHANf8u+N  
goqpWL903G+JdCIetIVv7JdPw5Dts5wzAglIPZ5i83FpOnQGAgeGlsbjYomU  
s8xSOhYX8jwREo7DNr8VEZFzdATyHXq+Xe4o7GW5glZ/Y2Bat+O/MdMjEL27  
9FluLwEmf8aBRM/DsBiIN1j7msT+mMrd00/EQmZSSPbY6ww8pKlptlbHIJ7v  
9Ee1lkyYfzl7ZNEfDYeSiJKxmhMIP/p16KBqNF4oxX5Jv30SueqTNPWQKNzT  
/7hZ9cop1AU9MnRojIS2/RYnhROn8aLDdfT5qkhcu+I0ftgsC3U/Tf4rCo1A  
5Hdjy8C7Wdi3Zba9uS0cS6SMbA11s7GW01w/qx6OXlb118lb2cAHn3PN+mE4  
lifmd21jDtpKnbkMNx3CYMpz1vmrOZja/kdYQvAgsutuOEtK5+L8ov6Bz3yh  
EOwpfZFQkltZpvN9+algmDGk1TLXnIF31OfHu6YOoOHwvdXrs85guuvxkMby  
A+B1jagvEs3DIZHNchXr9oNMdvhWRs8D5wURY2UVhHaVqgWv2Tx4zJSajMUH

YvixzMuZo0z8ePZz1vxqAixL7yrIjjFhEvXpVXYfDXcuCpRv/s3ECyZ5z+wL  
DRpMx60G40yI7G3cOt1Jg2zqiLHnNBM8T70rfN7TwPFcv+8cFwtGHUZftZ/T  
UL0sI19iOQurw5U1/1bSoHDEbamoJgvfnsr1jMXTcP5QcZ6sFguNs+9cbh2h  
QSzgj7Tadhb2ZkfaH4mhgcv+pIqNLgtmswKvucOoHqk0WWWasGCzMmJojR8N  
zG6lVAEHFpqF9mcEWNEg8i5GSNKJBV7e/o1bzGIIa3mYvdGFhctbuc3njWml  
rPO8ZO7BQuStx3wsPRr25GY1pvqzcOKGGeu1Gg2PyU6z3AAWfrUnGV5SoUE/  
SbmlKliF84p1geFKNCgffPSpKYQFjcEWHbH1NFz2X+7XdpAFp7zjfb2yNKxy  
9x7sCa0e/2GL1kjRkGVbFj4WwYJX0et6YhUNApbTU3+jWEgwsRjwWEnD/wBD  
e31d

"}],

{RGBColor[0.560181, 0.691569, 0.194885], AbsoluteThickness[1.6], Opacity[1.],  
LineBox[CompressedData["

1:eJwVzHc8lYsDx/GTrCKrsorMdBjFdvWzZ/dklFtGRJlLmSXUUU7LjBybjPnc  
DdnrKaFf6mRFyTVKhOhSqZSGEZjr5N7fH5/X+7+PstsJW08+Go0W+F//13Dy  
5XeWOI2g0f6q+V7TZfQmaajsG3uA6OW4bpLLSyjC/1I4dZM9QigOm+0aCrIN  
cDw+mH+XnSZ+n6qwb8mpJ9o/60+PZy8QezfSmAKMdiKuoqlspQ8fSvPdRFaa  
9xK3AwL0BmUF8ejshhg+r0Hiha5CbWnTMnR3t3n8lvqj+DnRZBrEXgFen7Nk  
UOEokXCQN5SXIoFvi8Nj7daTxA2eWLGlxQs0mvtzKp/EuVyHr4BzFXY88vg  
RgY5Tzw6x9vcJysNLdVKfbVxGrr7xCajcRIUHxsc925Zik/6HpUFTXJ4/vqR  
0ECfIERmxYxOsxXgGnBV/kz6Cqx18qD9bbkOyZLnfKSzJCAz0D+YlaIEI34T  
++uJUqAb6eYL+ajAoOD36md3paE70i9YZa8KL/9y19YRWRhc5xz1Z6pBtjts  
IsNoDSwX+jW7ZdfDap6eUyqpBldbnIRofg20vrV75uCsDNc/dMcMxjXg2Uzd  
MqlQAauGU5HTRAeDIffPnlB1pAfr6p9ka2F+UX/idYYmMrUGrqi6aUN8VXmL  
3w4tFAxw5nssNyPHUEIUakgb/ZmjbjJTtuDe8ikFwU06GP1lkivgo4uHMPHx

7N5tkKobpb+QZWA+YHVyg7ARpGUev7qZyMAT+ymrVmVjrDmRERfFrwfe5JLS  
V8YE1NaZjuiP66FTe0T0WAPACM0oy2rSB/EkS9l6nQmcCFM9f/Z/nxb+nBnt  
3dDmbMzUmTZC6T0d3Rcfd4OvXULgR6AxwLEcSsyyAOUy0HkhkEDjOVZmvNwe  
/DI2uGf6ANAQvaDao2QFG5cuW1veTlh/dly0ImwxdU0w1u+eOZrIWcLv1Q/C  
QP74T04dK2Qw76v3mHrg8bvAcYsxKzSnyMq5hXtgLxU2PLbRGu3BZgypWg+4  
GHJ7DXKskb0YzenX8wTz9uH+Y7ttwPdk331hLS94dMRVL9HbhzTbMSahcBQl  
q98F6ayyg691VwZX0heMzMSF5GcOYAUu27NdLgBRVUk9rxVc8JSh/nALzuPL  
F2vhDwLu8CyXae2NDscss3N0Lc8LJ50uP96QdAmxMv2Xcqt8EGbzYeu35hhs  
n+RFsyh/fk0/+GtpWwI8RWO+1GuykGYnYDZxJxknX88Ms+inIDD9ZFKETMGJ  
bnVRU4FAqDw109dqkYagdsMh3ks2vioKVxBD6Wi0Jrk9HWdhtvVQSFUqieXe  
t31Xl5zH4mRsyR0BuL4RdbMFQehXGzoehR1BfL5NqGRWSGI1A2uf0e/Bqu7  
dP4/d4TBiRGwuSb80m7/bNtW/1s4gpTOD1p8zkRs27Mzc+oXUWoWF3FYOgsC  
4RPrl2IEYPP0PH1nXRaE9ETKj6pGQiKx4vzfltmICL1o2Sd2CS/9FrK8R7Nx  
o3CNg4JYFSDZ174RuZgu9tKVsb8FCZ/7is4KpILW0Wat9xHDlbyL1VSj8uF  
+AOx5tT30WBTt/6sl8iD+fAFo3XPY8C1noufiM6DwvRyxZDnsfi+qXMqWDAf  
FwSS+rTb4tBwetRPLTgfdowswvHKeKz36gvp+5SP1g3swUt3EzDYVfpaAA  
tYZ9WptyE9HgOGfSWFUAPVds7X4jBiNKLS+IC9EUa791BnTZDTMOhurhBQi  
4BNzl9eDZDhPGeZFvSyE6BrCxnjHZQTGk/Kj24rwnjz+LrP8MhbM08Rno4sQ  
ki7lVrQ+BUceChle7C3C54st5NX8FDgkCUaVahbjMq/cQWZtKmbcv20LZxdj  
2dvi1qBrqXgZHCov/7gYppy12nHyaa7eqQuWKwE1Wdq5VSS0+CQwowftikB  
vyOrKkc8HdnMVSb7uSWICbf7SEWlo5tvdFNLVwk6Nct+/TGXjpHjrK4hcQpf  
GxWe/n0OC4bs4RNVlhSYxQ/UFMe5cBcouOZ0icL9G0I3tSa4cHAs41hFUdjC  
3b/ValoLx64te3dyKChGjDKdZ7gwZd08Qo+hMOus4nqFRmKJu17dj3gKFRKx

GdKSJPh2D1lw0iionT0oJq5LokPjS1NCLoWr/gXpittI+HT7jQTIUZDynFyr  
zSAhr0gfOZ5PgWaboGm5g4Qyn+sFi0IKA5r1u+N2kiDafV/wURS4bzZECNmR  
qBvbfsa/gSKKnsDlMvYkrgnP7jx0h0JkW8Pl9QdlZGju/7zrfxQCeM5ZZodi  
pEi/a1SqpGCVmlwT4U6iSntZ3XMehcaYAdNUTxJvzFUOVz+gYBi2sS3Hm8Qh  
Nq2/slrCRr/Hr+qPk/iRreoRUKMh213SrcOPhNuR0yeP1VKQdXL5/PYEiYba  
7AP76ygg21Anx1kkqq+WyxEPKQjtmvm5eIrETF9xJb2ewr8sDGHf

"]]]]},

AspectRatio->0.6180339887498948,

Axes->{True, True},

AxesLabel->{None, None},

AxesOrigin->{0, 0},

DisplayFunction->Identity,

Frame->{{False, False}, {False, False}},

FrameLabel->{{None, None}, {None, None}},

FrameTicks->{{Automatic, Automatic}, {Automatic, Automatic}},

GridLines->{None, None},

GridLinesStyle->Directive[GrayLevel[0.5, 0.4]],

Method->{},

PlotRange->{{0, 1650.0396}, {0, 3814.598558}},

PlotRangeClipping->True,

PlotRangePadding->{{Scaled[0.02], Scaled[0.02]}, {Scaled[0.02], Scaled[0.05]}},

Ticks->{Automatic, Automatic}] \) \!\(\\*

GraphicsBox[{{},

```
{RGBColor[0.368417, 0.506779, 0.709798], PointSize[0.6], AbsoluteThickness[1.6],  
EdgeForm[{GrayLevel[0], Opacity[0.3]}],
```

```
{RGBColor[0.368417, 0.506779, 0.709798], PointSize[0.6], AbsoluteThickness[1.6],  
EdgeForm[{GrayLevel[0], Opacity[0.3]}], PointBox[NCache[{Scaled[{Rational[1, 2],  
Rational[1, 2]}], {Scaled[{0.5, 0.5}]}]}]}],
```

AspectRatio->Full,

BaselinePosition->(Scaled[0.1] -> Baseline),

ImagePadding->Automatic,

ImageSize->{10, 10},

PlotRangePadding->None]) blood

\\(\\*

GraphicsBox[{}],

```
{RGBColor[0.880722, 0.611041, 0.142051], PointSize[0.6], AbsoluteThickness[1.6],  
EdgeForm[{GrayLevel[0], Opacity[0.3]}],
```

```
{RGBColor[0.880722, 0.611041, 0.142051], PointSize[0.6], AbsoluteThickness[1.6],  
EdgeForm[{GrayLevel[0], Opacity[0.3]}], PointBox[NCache[{Scaled[{Rational[1, 2],  
Rational[1, 2]}], {Scaled[{0.5, 0.5}]}]}]}],
```

AspectRatio->Full,

BaselinePosition->(Scaled[0.1] -> Baseline),

ImagePadding->Automatic,

ImageSize->{10, 10},

PlotRangePadding->None]) liver

\\(\\*

GraphicsBox[{}],

```
{RGBColor[0.560181, 0.691569, 0.194885], PointSize[0.6], AbsoluteThickness[1.6],  
EdgeForm[{GrayLevel[0], Opacity[0.3]}],
```

```
{RGBColor[0.560181, 0.691569, 0.194885], PointSize[0.6], AbsoluteThickness[1.6],  
EdgeForm[{GrayLevel[0], Opacity[0.3]}], PointBox[NCache[{Scaled[{Rational[1, 2],  
Rational[1, 2]}], {Scaled[{0.5, 0.5}]}]}]}],
```

```
AspectRatio->Full,
```

```
BaselinePosition->(Scaled[0.1] -> Baseline),
```

```
ImagePadding->Automatic,
```

```
ImageSize->{10, 10},
```

```
PlotRangePadding->None]\)      gi
```

```
(*-----  
-----  
-----next mouse*)
```

```
vn=readTac["C:\\Users\\exx\\Downloads\\pAM7, Liver 3.19, GI 0.925375, ID  
4292.csv"];
```

```
Lv=3.19;
```

```
Gv=0.925375;
```

```
id=4292;
```

```
vn[[1]][[1]]
```

```
{{10,51.2525},{30,294.825},{50,269.868},{70,114.232},{90,70.4085},{110,50.5598},  
{130,35.8807},{150,27.6268},{170,23.4977},{190,19.4233},{210,15.082},{230,14.31  
75},{250,13.5124},{270,13.0764},{290,11.6522},{330,9.5393},{390,8.11852},{450,6  
.01815},{510,4.86263},{570,4.46643},{750,2.50449},{1050,1.1462},{1350,0.553515  
},{1650.04,0.280518}}
```

model= mouseModel[Lv,Gv,id,30]

ParametricFunction[!\(\(\\*

GraphicsBox[RasterBox[{{179, 179, 179, 179, 179, 179, 179, 179, 179, 179, 179, 179}, {179, 180, 180, 180, 179, 179, 179, 179, 179, 179, 179, 179}, {179, 179, 180, 179, 179, 248, 248, 178, 179, 179, 179, 179}, {179, 179, 180, 179, 179, 253, 248, 179, 179, 179, 179, 179}, {179, 179, 179, 179, 179, 248, 248, 179, 179, 179, 179, 179}, {179, 179, 248, 248, 248, 248, 248, 248, 248, 179, 179}, {179, 179, 248, 248, 248, 248, 248, 248, 248, 179, 179}, {179, 179, 179, 179, 179, 248, 248, 179, 179, 179, 179, 179}, {179, 180, 179, 179, 179, 252, 248, 179, 178, 179, 180, 179}, {179, 180, 180, 179, 179, 248, 248, 179, 180, 180, 180, 179}, {179, 179, 179, 179, 179, 179, 179, 179, 179, 179, 179, 179}, {179, 179, 179, 179, 179, 179, 179, 179, 179, 179, 179, 179}, {{0, 0}, {12, 12}}, {0, 255},

ColorFunction->GrayLevel],

BaselinePosition->Bottom,

ImageSize->{12, 12},

PlotRange->{{0, 12}, {0, 12}}]\) \(\(\\*

GraphicsBox[{{}, {}],

{GrayLevel[0.55], AbsoluteThickness[1.5], Opacity[1.],  
LineBox[{{9.09090909090909\*^-8, 9.090909090884856\*^-8},  
{0.0874367476365131, 0.08197166587636243}, {0.18222810297558026`,  
0.1358255024317191}, {0.27073779576926765`, 0.13315455086535802`},  
{0.3575112797365835, 0.08143316377978886}, {0.4516394623155443, -  
0.007347854733426912}, {0.5394859823491253, -0.08816932746972758},  
{0.6346872009943513, -0.13787329990112937`}, {0.7281522108132057, -  
0.12816574147938434`}, {0.8153355580866803, -0.07001063326902106},  
{0.9098736039718, 0.02121659675083076}, {0.9999999090909091,  
0.10024804094746914`}}}],

{GrayLevel[0.55], AbsoluteThickness[1.5], Opacity[1.],  
LineBox[{{9.09090909090909\*^-8, 9.090909090880112\*^-8},  
{0.0874367476365131, 0.08090369567458766}, {0.18222810297558026`,  
0.12746559200130417`}, {0.27073779576926765`, 0.1116266937044405},  
{0.3575112797365835, 0.046963725126600256`}, {0.4516394623155443, -  
0.04509050859182233}, {0.5394859823491253, -0.11115559892361665`},  
{0.6346872009943513, -0.12642564594664163`}, {0.7281522108132057, -  
0.07740196037964171}, {0.8153355580866803, 0.004179083230780074},

{0.9098736039718, 0.08937493944143977}, {0.9999999090909091, 0.12834702174618903`}}},

{GrayLevel[0.55], AbsoluteThickness[1.5], Opacity[1.],  
LineBox[{{9.09090909090909\*^-8, 9.090909090875369\*^-8},  
{0.0874367476365131, 0.07984396759533968}, {0.18222810297558026`,  
0.11939549826670079`}, {0.27073779576926765`, 0.09184904274707059},  
{0.3575112797365835, 0.017913117173780694`}, {0.4516394623155443, -  
0.07109962300031061}, {0.5394859823491253, -0.11717052830989395`},  
{0.6346872009943513, -0.09879571259704382}, {0.7281522108132057, -  
0.022693471356141894`}, {0.8153355580866803, 0.06128703302641453},  
{0.9098736039718, 0.11605625481609519`}, {0.9999999090909091,  
0.10415981267620744`}}}],

{GrayLevel[0.55], AbsoluteThickness[1.5], Opacity[1.],  
LineBox[{{9.09090909090909\*^-8, 9.090909090870287\*^-8},  
{0.0874367476365131, 0.07879243663407876}, {0.18222810297558026`,  
0.1116081822210312}, {0.27073779576926765`, 0.07372482040530459},  
{0.3575112797365835, -0.006267252216927747}, {0.4516394623155443, -  
0.08743897872291118}, {0.5394859823491253, -0.11109134853087661`},  
{0.6346872009943513, -0.06371549528296311}, {0.7281522108132057,  
0.02544576624054603}, {0.8153355580866803, 0.09464282937855747},  
{0.9098736039718, 0.10731931496853601`}, {0.9999999090909091,  
0.0516787429232188}}}],

{GrayLevel[0.55], AbsoluteThickness[1.5], Opacity[1.],  
LineBox[{{9.09090909090909\*^-8, 9.090909090865543\*^-8},  
{0.0874367476365131, 0.07774905743802465}, {0.18222810297558026`,  
0.10409673959866513`}, {0.27073779576926765`, 0.05716133039337165},  
{0.3575112797365835, -0.026084496726167965`}, {0.4516394623155443, -  
0.09591154799603378}, {0.5394859823491253, -0.09685594593277226},  
{0.6346872009943513, -0.02730376120671303}, {0.7281522108132057,  
0.061646715198529656`}, {0.8153355580866803, 0.1046634148537508},  
{0.9098736039718, 0.07509702498429204}, {0.9999999090909091, -  
0.006536873471333553}}}],

{GrayLevel[0.55], AbsoluteThickness[1.5], Opacity[1.],  
LineBox[{{9.09090909090909\*^-8, 9.0909090908608\*^-8},  
{0.0874367476365131, 0.07671378556951527}, {0.18222810297558026`,  
0.09685439581479163}, {0.27073779576926765`, 0.042069810325321415`},  
{0.3575112797365835, -0.042006785469922474`}, {0.4516394623155443, -  
0.09808544986431629}, {0.5394859823491253, -0.07760167026270944},  
{0.6346872009943513, 0.0063643674428021085`}, {0.7281522108132057,  
0.08405712128907425}, {0.8153355580866803, 0.09555213349985489},  
{0.9098736039718, 0.03202960165577907}, {0.9999999090909091, -  
0.054402034659985464`}}}],



AspectRatio->1,  
Axes->{False, False},  
AxesLabel->{None, None},  
AxesOrigin->{0, 0},  
Background->GrayLevel[0.93],  
BaseStyle->{FontFamily -> "Arial"},  
DisplayFunction->Identity,  
Frame->{{True, True}, {True, True}},  
FrameLabel->{{None, None}, {None, None}},  
FrameStyle->Directive[Thickness[Tiny], GrayLevel[0.7]],  
FrameTicks->{{None, None}, {None, None}},  
GridLines->{None, None},  
GridLinesStyle->Directive[GrayLevel[0.5, 0.4]],  
ImageSize->{Automatic, 28.4375},  
LabelStyle->{FontFamily -> "Arial"},  
Method->{"ScalingFunctions" -> None},  
PlotRange->{All, All},  
PlotRangeClipping->True,  
PlotRangePadding->{Automatic, Automatic},  
Ticks->{Automatic, Automatic}] \) Expression: {Bl,Li,G}  
Parameters: {k1,k2,k3,k4,k5,k6}

]

```
Manipulate[Show[ListPlot[vn[[1]],PlotRange->Full,PlotLegends-  
>{"blood","liver","gi"}],Plot[Through[model[k1,k2,k3,k4,k5,k6][t]],{t,0,1500},PlotRa  
nge->Full,PlotLegends-  
>{"Blood","Liver","Gi"}]],{k1,0.001`0.2`},{k2,0.0001`0.1`},{k3,1.*^-  
6,0.01`},{k4,0.001`0.2`},{k5,0.0001`0.01`},{k6,0.0001,0.01}]
```

```
Manipulate[Show[ListPlot[vn[[1]], PlotRange -> Full,  
  
PlotLegends -> {"blood", "liver", "gi"}],  
  
Plot[Through[model[k1, k2, k3, k4, k5, k6][t]], {t, 0, 1500},  
  
PlotRange -> Full, PlotLegends -> {"Blood", "Liver", "Gi"}]],  
  
{k1, 0.001, 0.2}, {k2, 0.0001, 0.1}, {k3, 1.*^-6, 0.01}, {k4, 0.001, 0.2},  
  
{k5, 0.0001, 0.01}, {k6, 0.0001, 0.01}]
```

```
Clear[newmodel]
```

```
newmodel[k1_,k2_,k3_,k4_,k5_,k6_][i_,t_]:=Through[model[k1,k2,k3,k4,k5,k6][t],List  
][[i]]/;And@@NumericQ/@{k1,k2,k3,k4,k5,k6,i,t};
```

```
fit2=NonlinearModelFit[vn[[2]],{newmodel[k1,k2,k3,k4,k5,k6][i,t],{k1>=0},{k2>0},{  
k3>=0},{k4>=0},{k5>=0},{k6>=0}},{k1,0.008`},{k2,0.0001`},{k3,0.0014`},{k4,0.001`  
},{k5,0.008`},{k6,0.0001}},{i,t}]
```

NonlinearModelFit::eit: The algorithm does not converge to the tolerance of  $4.806217383937354 \times 10^{-6}$  in 500 iterations. The best estimated solution, with feasibility residual, KKT residual, or complementary residual of  $\{7.28573 \times 10^{-12}, 0.00216062, 2.42533 \times 10^{-12}\}$ , is returned. >>

```
FittedModel[newmodel[0.0629319,5.86338*10^-  
13,<<21>>,<<23>>,0.152387,5.86338*10^-13][i,t]]
```

```
{fit2["AdjustedRSquared"],fit2["AIC"]}
```

FittedModel::constr: The property values {AIC} assume an unconstrained model. The results for these properties may not be valid, particularly if the fitted parameters are near a constraint boundary. >>

{0.874361,904.217}

fit2["ParameterTable"]

FittedModel::constr: The property values {ParameterTable} assume an unconstrained model. The results for these properties may not be valid, particularly if the fitted parameters are near a constraint boundary. >>

|    | Estimate                  | Standard Error | t-Statistic               | P-Value      |
|----|---------------------------|----------------|---------------------------|--------------|
| k1 | 0.0629319                 | 0.0203612      | 3.09077                   | 0.00292259   |
| k2 | 5.86338*10 <sup>-13</sup> | 0.000632445    | 9.27096*10 <sup>-10</sup> | 1            |
| k3 | 0.00102909                | 0.000226034    | 4.55282                   | 0.0000233651 |
| k4 | 5.98196*10 <sup>-12</sup> | 0.00250285     | 2.39006*10 <sup>-9</sup>  | 1            |
| k5 | 0.152387                  | 0.0481363      | 3.16574                   | 0.00234133   |
| k6 | 5.86338*10 <sup>-13</sup> | 0.000295325    | 1.9854*10 <sup>-91</sup>  |              |

```
Show[ListPlot[vn[[1]],PlotRange->Full,PlotLegends->{"blood","liver","gi"}],Plot[{fit2[1,t],fit2[2,t],fit2[3,t]},{t,0,1501},PlotRange->Full]
```

\\(\^\*

GraphicsBox[{{}, {}],

{RGBColor[0.368417, 0.506779, 0.709798], PointSize[0.016666666666666666`], AbsoluteThickness[1.6], PointBox[CompressedData["

1:eJxTTMoPSmViYGCQAGIQDQEqDh4anKcDFng6QPh2Dlyli/IMc4ugfE+HsBs8

BQ/vFkD4DYE0s+KSdC73xUD5YQ59L7UiVWcFQvnRDlxen24sc4ea55DgsM/a

+/PuD44Q/oEkh6s/rE+VL7CGyqc6CAZJ3cuqN4fKpztMyS+ZG59jDjXPclh3

85T3P009qHyOg/zZJ3c7F+IA5fMdVjwwmh/Fpg3hPyhw2Cmh8INRXQvCVyhy

SHwcavjBVx3CX1DioHNj0ik5EWUIP6HCga0p4886GwWo+hoHj5NP5aYJSUDN  
q3cQm3jMIbRYGMK/00iw8o1P67y7ghB+QbvDvkc3Gww4WSD8jAkO2xyvSF0L  
+2QP5ktMddBxqZiasu2hvXmnY4LqiZkO1IVSpoxfLtoDACpmcOQ=

"}],

{RGBColor[0.880722, 0.611041, 0.142051], PointSize[0.016666666666666666`],  
AbsoluteThickness[1.6], PointBox[CompressedData["

1:e]xTTMoPSmViYGCQAGIQDQEqDq/SwhRXi+g5QPh2DpqHyo66eYZC+Z40t7+v  
2B/3Nx7Cbwh0EFRZ2r/eIQvKD3PoD7jx6rtylZQf7XCY9dU9EaViCN8hwSGq  
2OyycEYJhH8gyeFQ+gT1PsdSqHyqg33zdK2m9VD+gXSHn8JTebWfwuSzHCZP  
qrTvPAOTz3H4X3RpwdtzMPl8B7Yp091q06D8BwU05ppinOYw8xWKHDybCliv  
TIXav6DEob+PzfvDRqj7Eioczt7avqSErQiqvsbhXmFXn4pdAdS8eof7itXF  
73hyIfwLjQ4RH/9EbFeA+r+g3WGJ2Psck0fJEH7GBIc1uyKS9L9EQvgSUx1u  
/7cSi38f6GDe6ZigemKmw40tltnOv7wcAJdBdVg=

"}],

{RGBColor[0.560181, 0.691569, 0.194885], PointSize[0.016666666666666666`],  
AbsoluteThickness[1.6], PointBox[CompressedData["

1:e]xTTMoPSmViYGCQAGIQDQEqDnOzP0elFAk6QPh2Dvb+aQYsa+yhfE+Hqt5f  
5fYaHhB+Q6DDyQu63mp6zlb+mMM3HcUmuR5rKD/a4a4D64Zpdy0hflcEB9+e  
A5tnZFlA+AeSHEqU2leurLCByqc6dPDzskv+g5p3IN0hq1Gl03CeN1Q+y+F1  
cN/JpEUhUPkcB8H375WalqKh8vk069LmfrR9ngDhPyhw+GbkEGEzNxnCVyhy  
CNN1ebRzVjqEv6DE4Zip3eS9vAUQfkKFQ0yS9HLzc2VQ9TUONtp8PKyPa6Hm  
1TuU/1us+IW6CcK/00gQM7sms+FPC4Rf005wWV8wf+3qbgg/Y4KD+5qjyx2q  
JOL4ElMdoqdLLeRfPNnBvNMxQfXETAfp+Sf/7Tw+xQEACoNwKg==

"}], {}, {}, {{}, {}.

{RGBColor[0.368417, 0.506779, 0.709798], AbsoluteThickness[1.6], Opacity[1.],  
LineBox[CompressedData["

1:e]wUV3c81t8XtzfZe29C9sx9jhFC2Xtk7+2xHo+ZFU2klFBfZRSVHfkkEiEl  
NFB]spIZIfTz++u+zuvs9+vec99HxCvc2peMhIREgp6E5P/n8Y0Pa5FHSHCd  
o088UtWvwddLPx4txX7G3b1IW9RCeRVS+gSiH8T+wk09FE4cpy2AbJ8ZozXu  
LdzWM/7IRd0r8GZGy/Z87D5u0qjubLf2Jcir733EFkQGm/OviyxMzsPDqCiN  
b9xU0FQel8B46xyMKAtdb20YCsbamCknA1/1nsNibGMMDrX3fydNBMuOD35  
UZHPDK+pKEW8qc5C2ROmavogVhAeeb/yUjsNHvP4hETpsUNco5QBu1oKdCc8  
Ofa]mx08xNp6ZQyIMPajaQ03ygX8ZN3nfa4nwJyWT/O9Xh7Y4GobZISlg53i  
JwmMZXYgfeN7+pEDPNDvMuniYwWAnH/x70+yaOB39iGZOCUEtueouSs0IoHr  
8+S38nxhMjb0+c/7WDgIX8g2sE0WAW1rfCU5CgEZXeW71EGiUPhg6Gp7QSAo  
/5qkarcTg0B4PTwi4w86t7IDwvTEQfThvg7a9QHdu8r9IvIS0Db4ujn2nxec  
2p880sYtCf4CYWmpqp5gX5t9IYdCCkbj85laZc7AGTflFZ1VKfioTGlxpekK  
AYyflVcmpOGct9kcyUniOzIrr/TKwOBfRUvbk4ACFUmd2+QRbYjN/Sh27Z  
wlmBzzG0ZUch1kdBimTPGs6/zv7wNFcODE+7jp9RsoKrScpaEbHyEGY4LMag  
bgGl8p9viHkpQOqDtsB2FX049zl77/2pY1A91VcWknsSPhrxHOvhVwSj/yK4  
/UWMybj0+WtpviLwRXaQ3Fw3hKmt7svxNEpwNnv8y/lffhxuljPOLkJSJ7y  
JSEFPVi8F7Z+9LcSrMbSnTkjiIPIA4P/KIOU4dbyC5ebCsdh3Z7H9utXZYj8  
qrfSk6kFf+qWKZ7YqUAD11cFRQEN2KN60ZQ/oAJWNEp8uqQHKm2C9ETxX2  
uDrNuDeVgalljMuorRUM4ug0BY4qAe0Rwz4heTWgLS3saeE+Bkz+PAk7d9TA  
8ZsGY4KMHLA+W5YZ4VaHA5asAaE0GeDkejH+4KI67P8b3t7jlgK+8OK8LAoN  
EC+5yr+3KA7CvWHHPQgaQOSVda9YEwVxIcNfWqsaEG7YevVASgSk43hK2fw0  
odcpnl2RTQjk3yyf/jWhCQ/rXcBRnB+UpV78e2mlBZncv05JRB5QTyl+VN6r  
Ba+/XTnZy84F2h/CPAm62vCgZERGfo4dcMcMWW0btAFr0pdSWWYFw2yebnkZ

Hbi9+Yr8izgLmHxdjqYu0wHSUpIDH8YjYK7xQvwb+3EotNbY0xZiAKtLxWNt  
ucdhdsPhz4c4WrCfC8sqJNEFioqqrwXM10CMM9Qi9WFOSWBax7fKUAhW7ZU  
aUsXdtutUW4XGZC9YabcjEEwPidPovmJBN5z/glu3UQwHe4plWFWgLvv/vld  
YgwOnmd5Kokp/MWl3uvWwm3i4Df/6WaFwG2c7B9byzRtgEt3FFD80iaOna+P  
3JsA4CjwsuL2ow3cAdjPMWwDuDZ/1onh4Rpu3qsuSHIXwJW2J+da9wruXZal  
Ii22HjhPsLZzZi/hntYUDi8k6EEEyTnug9IFXOUQdebAEz1wKm6qaCSbw+Wv  
EzRrd/Rg+FPayYyaGRyRc/nnRS196OPGmyZemsb5aXuWRSTog/wpNi7X+1M4  
S/dRa+sn+vDX+cxvkbXPOO10YyrVHX1ofhgySmpmHCd+r+0Jh5YBeObTJGGS  
H3FM/fKhf+INYLa6arL/0Rhu51e58KdWA3BwFzegSRzBzbCwj7ZtG4Cz9aDI  
z+Rh3JBadnaJpiGkzzQjkdA3uFanXe3keEN4kLwpHaY1iLuTFLp8ptUQAv0y  
MvScXuHO3566rbdtCLPLx8ZZXrzExfbY2IlpngDTvOo0g6gXOI+FlzSU8SfA  
8Jn0zKZrF86MUfvpbMsj+K5KVvQ3qROnrlQb3vfnBLgMRE3cKevACdsJi9Vo  
GAH/u7zkrRttOLqEgvd5cUawHF3/92CmBfe7hCo3tMUIblLHFj2PacJ96UzQ  
tfhjBO96xTTJjBpwfTNLq4oaxrDpH9ZpbPEYV0/jUcEadygbOz8s5nqluyU3  
4vC72Ri+SJ30LFq6j8uxNKJ/v2UM10tUZ/XZq3FR+CdYi7oJyHwc3OLMuodz  
vS4XVRxrAtFv5vJvaVfgjJ6WSSQ2m0DfYD3bluwnOIU6yfXLRMo0saGuK3K  
cbwUWeeR+km43Jxbsnf6Fo5CegcnHHS+k8EuuZY38CtmIVskDafBHuxjabf  
/13DjYd/vfd98ySQbBgo2ulcxb0osHbuUTMF5szkJ3ksBbi6lh7GyhhTuDwe  
kS0rfAV3fULzeU6TKRxfVQ/c7rqIS/93Hx+0aQppDKl/CsvzcCFiQtLmambg  
rYT5/XuTg7M3zp+QjzEDAn9JaJ9JFk4vmPLSkSYzuLg1qHWRPAMndylef+23  
GSz3zzWk76Th0Bt+br5TNQdM/yDzoXgquSDe3Uj3hyKtc6dUv9HxC3uDrsw  
NZoDeTVNyHc6Am5U8ARz/G9zwBudX7rpHYfD9Fu7nVRPwTXFFxZ5pDG4Kr+j  
cTr4U5A4NNIS8TkKl59bKivQeAp8HGieXFiLwBHRWL4cbJyCwHoY0Q0Pw/m9

y7gypXlaskfgrZddMM5y649hV/RpMOnV8o49H4DT4Q3e/q/hNHhSFmH8DH64  
F9MxqydXTsOJRQX9U2veOPP7qfMrshbww2+I5jutF24sOm/qqp8FSG9hhpRW  
Hjj340Ufde5YgGufo1l6hhtujuL222+fLcDE9oIqU4MzrnXWbqabwRJIuLL  
L0k64vZMXaaKZC3h4hE5bqOPdji9hx6TgSaWUNoYfy2wywaXxeb38bifjdBX  
kN2J/2qF648LHj2SYQn3r4pRVcla4pgmI95037YE83P4NR7cKZw1xA42PbOE  
1h9Ps43xpriiisS+nM+W40LCztH7yxg3QZP2wuWvJTh+UciWKk7ghEOzOhV4  
rCDVIUI7s8AA5zOc95RUwwpommYilpv0cFVqV1pHba3g9yJj5R0KwP0qLmqS  
jLICyh3HcMfd4zjlg5uPCJetICdlcuOIujYu1uv2g1N1VpBEQaj1tkkD1/by  
XpXwoBV4ljRcpI5Swx3IPqjYWLACdnLXa70+Kjj9S4/LX1Jbw98nn4Tf5ynh  
sjeaS4olrEF58K7Gascx3KDD0+shBtbwQz6zRLtZDsf89HkhztMa1pGxcvy2  
DM5WuPcya4o1HMiwbj5LksJdzxg8/6PEGjyUdD0qcRK4yfnhnNY2axiuUnU2  
0xTDiZz6kJH30Rpa8avDxV4iOL/Hk6nuW9bwcoDA7BYthKvhmCYqsdvA6ZgK  
q5Yoftxywllw8hbINuFc/MItv58GpfFnCf7CwgcG7GaWhRly4eP31ijpQG3Bp  
3dS/wciBe3rvT0hSng28COLlkKBnw5HQ7wdYVtuAleBWXaUWC84wnMxXrNcG  
IkOfrATJHMHljFB7bs3YAP/PG9q0igy41xqMbq/IbGFo1fgBawotjrWE1alE  
2Bbm5n75HxyhxtmTcNuFI1uwtCJ7kTlJgbvhI2Cl72oLQaeyokq+kOG+9Ime  
4iDYQmzCxQE/FlKcqLz0yflrtvCh02S4ceoA+V+RP9HeZAsdxwXiSZf/ogeb  
ynoXR2xhpVW61NZgB606aep6rtmC/3lFxDi+hVQxXS3VI3ZAFuzTcvX+b5Qg  
aqBGLW8HU4mKnfb16wjLMIEaN7WDNQ/heuLCKiL7eUq+NsaOukeZqkKvLyMj  
CxuZ1Cw7eNQFc6kPfqLcBkcJmwo70PTFv9KiWUBDX04ikl12MB1jPNpSMYvY  
iN4CO1/tQNDp7saxxBnkOBXAM7hvBwchTMOiWdOoxDCMo4zPHj6x50hzPp9C  
U1XRLFFa9uBB/s5GweIEmdMYDzhYA8EmUe8ikETKCAymZY7xh4u8Aswvhn4  
iGrHzlL+zLcH+TmHlxOh79G61jIS7JE93GNWS+I3HUXqpRf3Lw/Zw7HPbWFn

nN+h+3fWVYd+2oOY0BDB5c5bJFxpH0JP6wCltpasOVJDqOh+238mkg6QE/1K  
/YftAKJ/JDiRaeAA6nRGTAe9fSi1MZ2128MBqNDb5PDol2irdfYkSbIDxGU/  
vR/p9AIFd5im6d50gA+DGuEhkV1o6nldK6HVAAbbWmrSzmjuR3UvW1ZYxB9A8  
5fYh1xRD/f2xUpvrDiD3oKvcC9+O4M24uzKzI3TljYzEfW9FTSOoKFzeEb4/  
YC25f6kZyX688/qBqSPkJOt+uRndiMonqSgX/R0hnqqBpCC3HnF8Czoulekl  
d03fBU68eYRyfwxF+9xxhMXbGbnbxDr0b0H5/u1njmCgX5KIXXEf4ZeLpr9M  
OkLsVmx/2pFqtLi+y80/6wg/nd5zzrTeQ2f+uFs5cTlBkdGqTtiNCjT6tyun  
SNUJuEsuvH5eeweZkkh1jlg5QQW2GViyXI6eUeT9YQ53At4yNpNf9aVIIXF  
4fR5J5j9aieQP3YTVTPa+OVVH9ofrJpM6xYjQdaWW30vnQA/x+i2N12ECjn5  
xihnnIBzkuXkYGchouVLYTAgdQac3l0utXf5KFnou0GqoDOQR4sfrk1X0G8x  
48QOHwclPv5Up3DnIggUvl+/6+gMN/gcafn5zqMvckcWNWKdgbOoocUu/Ryy  
UYoWiSlwBmKnT8pR6WzUp/bBsf6RM4Q8JC30psxESFvn8sprZyjq4Z0IYT+L  
GLBZr9xPZzDhsaPst0pD0gbk/wJpXKDxyeMWtZgUVGrsr14p4QL/vV73e59P  
RGzma6Ez+i7wkl/9ge96AsqxPHZXxMMFvlg+5R05F4f2bQsm3ZNcgHx3V2PD  
NgZFOf1hK7nhAnh7abI3dtFo3s3F7FOLCxxTTPmpzzo5Ebl7P0jnHXMcn2cp2  
ui8cvfMTa7NZd4Fi+6aAyTchyCQ4e+3yEVfgyqKI+sAThDrCf0oPybnClObr  
L/N3/ZEy3sKD3tQVXkaGeYdF+KLK+IZrjv6u8KfVJV4m2hvxJ3G9ycxwhfli  
mqKJsk+Un5ZI1X3bFb7lz6sa0Xgg6qyvuiTPXGHL44qjtZAbIuYaxOhOukI8  
m1GJEsEzRv+sfEDYcQVmXxfQ4HFE/gX0My2cbmCGHuPXNuzQ5LVwvk0VN0jK  
lgpcJrVfViUj1spWboCP/6MzqG2NXpZr5IaHuUFQ0m1Rp1uW6Pjdm88f5LnB  
m2pmo6tWp9Hj6n/bC1Vu8J6FRZv2sRmSrPNWlHrpdngf96fGLE6ikvpef5/v  
btDrcnG3S9wYsbQcLbtN4g5MTTUT9tInUFb7pfdBNwh+kP44JSrAVr5G5dY  
pOsOw0XhXK9v6SHH4x7Cp93cQZDuGrscE6DnRJMeyiR3kEsyjWi30EWyHYpB



HSXuWBCpW/L1lTYq2Oc+EvPUHVQunx8lzdFEe7qkjXKT7jASdXE7NVMd+SUv  
OM78PbT/PnXtYZsgeoMN79/kOwNH74voTwmpIM1/T+7Y6JyBjDscGaG1SugO  
7o4xvcsZwJ+J5/vpoYjoU3OXughngGTLxdkgUgHhO6OuEG6cgeYw3MD0GTn0  
mcRFXbntDGTVhk7jM2SRkZ7BxMKnM7Co/mT7yZg0eph2NPX2zhkoZPssXmEh  
hRi+nct/wOABrGra9CYbEghID3xy+D3Asb9PYKFdHMWIRGn4yB3KZzFNrEIM  
1ejN0sJxD1BkPpm+XyWKvng6T/KZe0D55Atlhx4RxjY+VPfHxQN2Xkxlq00K  
I5M7+mkjwR6HfLanUeiEMCJ2Nds8TPSAlzxfS+NhNDjaVnJvDwP8Oicn7gp  
Lohmycq2/W56QF6utRevkADiFWMb0L/vAYFqE6+m1fiRhUH2LcF2D8AXz/Yr  
+vGhDO+/4bv9HmBrwnCt5gEvaj0brv9+3AMejHw/s0Xji3799529ftEDbp1n  
qt0M40GiLxzmLux6wGavdcbnOW5kPzPwJJDOE5pkmfMvh30jXAo4f4LXE5x+  
6JDTUXCjZ+KN7iKynuaqPUBx4j8u9NtQWmlfyxNMxRu6j5txIWnfEvJPjz2h  
mnYhZGmHE7llMr9vdPIENoljY/IPOVH+3Yyqy4GeoBW4kY9CONHLnm1CSIIIn  
ME7ktLkocqK/P0J0mZzzhKNV+2ef7XlGRapvQuLFnqB5cEaqop8D+Ujarf+r  
8oRPdNikQRkHKjZ69Wki1RP2m2hPUMZzoCE/3WstfZ4w1rTWqWnHgcYHwcW  
fPSEj8wZBdfVOZBGpcTx8PnDegcjrDE+DhTSW8xktu0JUb/8CwwOOFD5HOM3  
SRovuJ7As/R8hR2NUqc3kHF7gW7Wh8iRz+yIVnor84uUF3zspDY4PsSOkEmQ  
Y5uGF3wzjd7H0tLRVMAX2SjjLxg4vnWXpokdVeZY70c6eAH1wx9lZxsaLLq  
5ZtT/l5A01Y/WnGbHZ1YqMNTZnsBmaqM/eQVdkSgFTP+VuQFfBpWNg057KhO  
5hpPxz0vOP+uaFs6hR19P0m/dL3ZCzoCZ5J04tkRd1AKhn/pBbdF6lwb/dmR  
ee7GZcv3XiArFMBE68SO0mr8veVmveBEhbdnDE7au6fUKPZ8oLZ5KS3v1TY  
0eKiBc0MpTfsyz4fecrPjox+L/x8x04Nx+2Eeifl2dGd/bNvksS84fbW6dbc  
OTZ0QCXYKrsfTiPJZQSe9mQC3NrEZeeN2iZetrd/2NDRtZWhBkLbxB4J/Jt  
lsCG2MWW3B67e8N54vrRnlNsKEluSy851BucVbsk7vOxoUE1YQkzojd4zfg5

ms6wImlcGw13njcQ4ppP2VayogwT26WZYm9I+ph1ieDDiqaslt88rvIG/fXa  
yJA+VqTrktOQ3OINTx6Sck8PsKAbPqLXzF56Q9Bfh/SsGBa0FfqUwD3mDbmd  
WY6M3CyoLnVVr37dG1i8erJzjgRXW6uRAqpD9hKky08++8I8isQpzVn9oGZ  
sU/bz6qZUFcJtsQt5ANL2STXXEoZkdA9x7c/5H3g+AnpVfFEBkR8uN5Qf9wH  
zHFuFKU690hj6/lrKWY+IOdClZ75hRZdHuh05wn0gcE8y+gbL6nQ0qiz/myc  
DxCDnhmcoKVEJl9+SzRk+cCDA10NjxlyVDF3kTb1qg9YyqvsFUqQItl16V/m  
FT4Q0EyfHrazr+u+2/WWp8EHpsa1Avadd3TbyN0aZ5/7gGY+Rm0b+ls3ivNK  
YupXHyjvpBy8qfpdd0jo6JlTy4f29qvr7imvdWVlevR5933A42zjf95bLzq+  
6+zQNvL6gvkaVduY4moHnCj4lSrjC+Jid6atL/3pKDktP3xK0xeeRsUHC1j9  
67D19Lw+Z+cLqXcsrlpT0GCPgv4mNvr4wipPzUhDGgPGgL96Ji3aFxyNDDKm  
bjBjPVmvJPmu+ILTPPvpqP84MNHL3nTzZb5AH8LyBtlwY8nF+78a63zBRixt  
+bswH6b+QKnp9KA vWL75e6n7sjCW3zRwnW/CF4jZB6vDaqLYMuZLnF/whaWD  
gsT2LTGscrjYIj3aDzQN/J6YvpXCKCZUpCw4/WDM5o0uyp8ymMfMazp+CT9Q  
HbC8/VJCDuP+Q/quSd8Ppqavn+hKUcTwJCVN6VZ+4MEkG2v2Vgl7S6tebOHh  
B1SPo+eWlFWwc/xBHgtJfIA/JzV9QVEdm5WgMGw+7wclehc5rw9qYPrHSqXO  
3vQD+9KKb2+IWtiu3rtl/ieH8tLHK5/5dDHLQAVaqVd+YLSiP6OvjsPuXc4V  
U/rkBwromFZoE2A2X/UdT+z4wR33vnP/sRpgNVRIURa0/nDN+XWvhr0hRqLw  
97wTjz+Unik9r1l1AntAbHgequUPcq+usY3Em2BkFUcm4076A/ZGK5dz+yTm  
OBC8lebkD9liN1d5ss2wuvVe5vOB/nDR54cl0/spjJjX/GhRgj9w5+JrE01P  
Y656qSfKzx3mmzH5ZENtgDUHTJ6pKfYHbc8f00QFC4zmsiahsdofDH8Nfnz/  
32nMvaWwEHviD7Mx6a/0zE5hjV9W6/pe+cP8B8GtPFozjI7q1Kt3n/xht1Su  
9Iy2CeYhX/19csEfmiqYMNPjJ7AWW8qD2R1/0L+QRsJxVB9jInpyr9EGgOvu  
WWGGEwJz+a9D+S9PANAr8ygOEDWxtn6eU5SyATBNezXzS1UFY16P8T+iHQDt

5g48nuLymB/PuzQe0wDAG1iUf/sijj0FhRIx5wAw06srdIDnw1gDcpvlgwKA  
NBm39LP8CBZ4afatBiEA5ip9G1r69jo6m/V/6uUGwDWHnw/zu752cH4ppTS/  
EQDln6XpzFqfd4RQ/hWyrwkADzXnoUTSTx1dcg7aHm0B0Cjb92770IIHt22D  
bVB/AMyOxc50XtzuCEs8Eo4fD4DCbbPunhpS7MWd4HPJiwFQadjXeiuMCuPr  
7/0vZzcAAqYKvzs00GJRa2JYPl0g3HzXfTD1kQ7r4079WMlbCHXW+9wUeDpM  
ECbX78kGQquzgj1gGQ2G99dkfKwdCB2LYg3HnCmx/ouFUu2mgdBGxqKieZcE  
E25e1etxDgQPM5KrqUKbHbGfzV3fBAWCOWWHElnjt47XFNWxnwiBINOr49qc  
160rLkd55XtuIEwN2ikOZS7oEmw87/+6EQiRmayvLXi3dN8SONr+1ARCAefx  
xUdxB7qSd3imSNsD4fydU0unlsgQ8VXMLv1AIOfz8Nf4zk+F3q00s3NOBAL/  
8FuKotc0Sjpb4Zjwz0CYNTxn63dAh1JwuSdl/wZCzNZISduHDOi936y3Kn0Q  
PPcuXf7zgxHJXdRPRnxBMMi8/fNuOxNKbyq9bnI0CI5Z9cQkqx9BHyd36611  
gsDgmegitfMRpEDh8NrVLAh8N+Uq+2SOoIyjDXN+LkGweoGE3vhwfo9bHyGL  
DA4CnFhbNO0ki1IiBPMnjgZBiUusrqiHAeXc7lXPzAuCkFqrwehAevSIT8zq  
0s0gkPwQEC89QItUV10Ci+8HAbv/x9vay9Qol2sy87/2ILjy5+k9xfeUaOfi  
XlFwGE9TkscY1fIUQDVxqbIRBDcQ/W/dPhI0YlNWr/y3SDIPSDmu538o9sY  
wlf6hi4Y0i/hi/0Ja7qiM8LvBXmD4Ti3Rdx56zldkhENo1tawUBi5KkReu+C  
bpipQbLryWBQZCvKv8o81vH5+elmPqdgOokv/bfM8aPDXMt5eTwwGAJ0X8r8  
Yl/paHvkK3kjPhhS1xufr6j87pCRjnR3ygmGTREe8Ufx2x3Xy4hF3NeDofHX  
908UpnsdVFw5Qx8qg4FQtECiU/yvI+ZiAdW1lmAYVUiZeHOUFJuhLEP2vcGw  
rfeXAXTIMOukmliOD8HAJzHyX+EGGfb8d1Pd6GwwDGyvKuBPkWOKIc9nC7aC  
gbT5k9ctfXKs9PugoA1VCIQyP/Pl+kaGMbp8tGfDIHNU8TyS3jkGPHd94vD  
EiFwKTZGxk6EFFs8uflYsloI3BAXUAI+9fh9Hz3wOJECLyzcvhHs/q3o0+T  
SuOIXQgsZnhucN/906H+iCV8yCcEBIFINY5fWu+4KyVQeQEfAuYJDMsipxc6

2Mukv5pnhMB8enfqWOGHjnROVS6GwhAgsTWgz5po1127gLMY+C8Eqpae66rm  
z+h6UJpl5zaEgJz1hVqrFxu6Q0T7Zye7Q+CY5trXTvUDXd3fnn9oRkLgh/md  
FzMjFlj3e7x/9noIhPV39LB+Z0bnnDPKjMhCgfuYyGCRMzvaHr70gZI1FNxx  
YYXRP7jQWoc94wylUAhxHIm/KimEDDXrUwz0QuGYws7rF0EiqP5hRwuZVSgM  
pmYY3zAUQ5dLR6XSikIhvuBqAtW2JDilktEkPwwFdtN3dLWyCujJBiPoPguF  
pwqRFwa+HUPSwTzxe00hQPWLodvqpSIqmhZ/1P4lFGwojV0eFSohSmfFecJy  
KCT0vlAVsFFG+GEdYe2DUainl05emldG0ybGjjuMYWD6LK930VwFWXVaX24V  
CIPaj0UxPbEqqFPDvS90PgwkhleWZNxVkMLDQBIN3TCwmNTN79IVRrckYzS3  
zMog6bFU/wlDZcRQmhrR5BoGVSDzq4I0IRCB43wVPiQMnnvZyMRQK6KF89em  
VIhhIjr+88e5XHnkSPEf90ZeGESN9isPbckitY0nOZH3w6DUb+d67S8JNGjz  
c1ikLQwuGmyaZb4QQ16N/Hzv+sJgrvCooPsbEbTNfton/UMYnGTuqvZhEkYX  
Y1JqlWfDQDXldtSpTX4k/v7R1vTvMCh4tj85qMGL2tWncQXk4RARICQ0ssGF  
rK+xnTNgDYc55wtvfmlyovk/hu82hMNhSWdIupqTAyU7xvJVHAsHvWcBT6+U  
sCP2J5U+tigcxlmtkww/saMank+1FKfCYfsaXFXK4kB6BLo/jS7hkLz9WC3U  
mxN9HNcB36Bw4Ij7yJdyhguF6YSe40gIB1f7WYqVAG5EUVL6ric7HLg/MdYZ  
Hu5nN/be8MUWhcM/vbRRandepOhG6it5NxxejkSpdUryoZcdynXvG8KhT8H0  
SkkLH3IV9PmT1RUOvhqXeAWZ+dFG8lXQGA4Hx+f+NmdU+FHu15fn5r6Gw43B  
ER0PEX4kDNvvri2Hg5LTyIjwOB9qLpfn9kPB0F/P77bbnzoXmqt8h5lBPh8  
kGCyqedFa4pGDraMEfC5xGhFg5oXHf/2JfEBewSsrN++1OrLg3KuxJVT8EdA  
9ieNldHX3GhEj7nHVSswC3ljSMF3AcSPB9aqFRtklqHdkW5pq40JBd/SYGJUj  
gNrvLO4jcKEm63FlX60IkB4L7lQf40Qk5NEOHRABVSvZ1HbxnMisgZ7IYXIY  
v+kDu4osJyryrigPtYiAHkmX+beLHOgbm25Pj30EeBuwpiu0cSC5F2MLAu4R  
0BxllHhZxIH8GFMsb4RMCogg09P4kBd4tQqQyER4LSYxnk2nAMxjZU5SOlj

gN6i5ZV5CAdyytQkJice9jfAajaB50AVasPl79MjYHvqhUNWDgda/RHYo5Ab  
AcJM/LUPqziQThHZYtaVCLAasaZxG+NAWUY3mb5ej4D0R1WSP5k40fCWioPG  
eQTUSLj1NNtxIv7KQYdLLRHQXv/wNn8NJ/J38CX01UVA9Yev8QkMXKie+qAc  
1xwBQezyNLJJXGi/pajnWkcErM6/Z8jb40ImAccWV15EgOIYv+FOLjcg505j  
MhmMADUnFDwszYO+9nmolI9EQN9vAi7iPQ+STdhx2B6PgDUp1mTlQl4UK5NP  
tJyOgPcXEycSzvAhhtzuHpK1CliKdDRwoBFADtqui47bEbDgX3BBZUYA3Vn8  
zft4XwRsnp5zp3shiDTNJB09mSJBZKLnn5uRMPJlOLf4/Ggk7NYN033IFEV1  
A+k1rSqHsuARUfVCUbSVSwx6qBMJ7MIlrcHMYiiLNmKxxCwS9up0+6+Si6Oh  
vsCaAptI8Ksu3b6ZII44c7yDcl0iQYVpnqFiSRzdo3JYjAuOBLOgKQbUI4GW  
eyxrwqIjYpk6XK2pCRSzzQN8k2MBK2HB7lCKZIo2dBQ1vVsJNQdt1NQHpJE  
veRo0TovEmbD5Op+skoh5m6NmpMFkTBN/1w33lwKOaYrBcHNSKj+ZMFMQZBC  
5XpHZTX+iwTLUg6n9htSaj5EYIH+fiT8ELIw66+VQoqdgjXiDYf5xbV43eql  
UHwKdxBfeyRQRjHvlFVKoU7EKsvaHqn3h1j4np2XQjQH9Is0A5EQUJomPWQ  
QpYdlDX/3kWCx+vMTX0xKXSd+C9wazwSzv2NZCcZkURTOjsyv6Yj4Y9looFp  
uCSS+bu+8H0xEjTs5MSqtiVQVNtS9fh6JNimj+a4R0ugtoTZwOHdSHgypkHo  
+iqOyLSmZPrIosCx3qH8k00h0+1PCxhdFCglqIVYXRBD+S0j1U2sUWBY8E7B  
dUgUjce+DnzAGwX5booL70hEUdBm50KxbBR8KVS50q0ljOob26ovK0fB00st  
t7VSBdFudGNgtNYYuqEcV9umF86089coFvGkUmL84sH170E9HH9+uDraOgu/P  
rrhznONA/JE3A72co0Df8qmDPAkberByccEiKAqMxgj99yTp0e+6nGqjqMP4  
tWavFtlo0fGw9EBdQhS09hp+4h3/pzu4FLMgmxsF83fj/SJcZ3TZH4RXi+RH  
AclyVqXwbHaHa3BgIPeNKCjxrdnKMZvp+LXgukBZEwXXT+pbnLiy16FebV+9  
9zgKMj8batpGkmHJAZaBG0+iILLFTGVcjwp7KWUqs/g8CpRHOLSPPqbFmOYM  
FqZeHeJhubGs28yA2d/Trf4wHAXnLQo3aEyOYKW+GoFDn6KANn4e/7yOGZsV

V5Lp+RYFiwkLRxvjWDCFGdmF9oUomPI85fkOOSsW+594df1aFDSTNn0ksWHF  
MC/BwOqdw/rzdP4te7JiVKLcMuWk0eAlxNS9IM+KWXxjWSiijQYfH456zkYW  
7Ho5ffUFlmio+KflfHONGZs6QxmYwRMNI/Kv8rV7j2DSQv+kE0WiLa7sL28G  
EyMW8WV7PlImGvBlkwHuh/uGeX6m0jfFaLicYS55f4cSkzZiJVhqRkPN9Hm7  
V1WkGMVuadcXDRU3aV/lh2/0zFVe5T+mHE05LYmZZS2L3U89Wy1KT0dDYpN  
WtLDBc86rnOcKGG0j4ZVZqYm3Jk5Xcskd/kln2iYcdkk3fKIQHJKP2NcQqLh  
UUM7XeZfekTzIw7rj46G5g5xAu1nFtRpfswiOj0aLANvUnP38SBF/heRfuWH  
/WjV7f53+N4Z3lq2jVVGQ/JzqvIL85Jo/uxnshMPo4H322nLJ5+lUfnPrQlx  
LBr4XzL8dbgvh4hlZyfe6lhZVcpNy9FATnaMEuQvY6G+O6c03+FFZE9a3Q  
yNFoCPrNmR77WxExt8s0T01Ew59BPiqnViW0FNZ8YPE9Gt7f0AjdClJGfaIG  
xs8Wo6H9vuTObToVVPH+zSWF9WhwO/V3tu6qCkrNdf14aycaol5/j42gU0Wu  
aEGYkRQPDxOM57X8VZHmekwgkQYPA2UXC041qoj9Hln9zyN4IFwQCFV6p4pW  
nS7tOnPhleay+z/Kz6pokJHfoF8QD+FbLRHHXqmiqudVeVqSeBBivEJCeUV  
ZcSojVbj40FH1Gr5NVJFHjld/NxqeEg4eyZh4YUKOv75tG/2cTyIpBx5/EhC  
BXFfmajdMjjUq00oUIUro7fbv9GYNR7Gb2nd+v1VET14kJZt6IyHbxaDFy4c  
8rEcD6a3DZ54uH5f/+QbYwUEfVKe+RF42Bsa0Oggyij+YmM1aTwe6j2/iDQ/  
kEbbx/TWI1LwYOp87/VnUik0+v219lQWHl62ipGpESXQo2vOZy0u4kEiyf5Z  
05840m82N4BdxUNQJaKMmhJFAf+i2RVu4aFQY3LEoV8EGTaQuN2qwMP6IHlg  
xJgwEva/cJfhAR5E94OnUraF0B4v73JiAx6qTM7eS0wSRB+H7qn/bDvEj3hK  
fFRLADWmq6Q4d+Eh73q/0zl5fnRZvbP31Ss8/CzZNbrpyIdCFs2ZtYbx4Fgm  
RtfVxotMSj85Vn3EQylDUeNNC14kbu13m2sKD21XKC6ys/EiEqqNhay5Q72N  
bfonUl40+SRFeWsZDyguKOkaNy9qDWVI9N3Cw3kRueC/NryoUKS4e3T/EO+4  
ZI36R7wofEyCwZAYBuZvGQ0FH0VDjkq53y8wxEBLUK1DWQcfcgglbR/YYmBR

r6DN3o8fSS9Y54vwxYCh0JZlqKgAYj7REhgsGgP4g5HWzmUBtF3Op9ckEwNH  
J2RrvUJoqm9F05/ijHA83hb+Pp9IfSo0aQ3HxcDD27GS8w9F0bXmWtLJ41i  
IGuFXlZOSwSlhrDESp6OAZcWe2PZhylooC/mVIRdDJCvfc3FBVfVuLj4m2u  
MeB3g0mU6Yoo0k5Fe+Q+MdD812ZrakcUiU7eGTkVHAOztxxGJVzFEJ0m9f1r  
UTHApJ8X3dwshtYlgt0/JcRAGHV+iAiNOBpfeeN0NC0GTjAecdW8LY66zFSV  
YnJiYCzq7lDnOXFUU3md5tmlGHB32A5gbRFHBeT7X2muxYD4eM2z+DFxRDzj  
2WJdeqjn9Qh0/y6OfNp7LpbcjQELjXYK7PB/M+eS9Zt9EAPalmfE2/rEkWr0  
RV3FxfkP7jBUvylviiP/NOjuhPQb215mcFFzEEcVRh6XurhhwaPco6yYVR0tZ  
7d2M/Yd47WUP2VwSQ2PTQjcdhmNA8r1USiiZGMJQRtTtjzHA4f/9Z]mTKLp3  
Y/7kz68xMDrk1htXIIIubpmLqM3FwGU57cuZdclo1vrxdvLyIR44DUKdtRBy  
r+N427cZA+xUSayClAlIi5QybofAx5qSg0MqbxIwe9LsitFLKrkj86/HuBC  
XF369vfoYwFYUPabOXZEIlgpv8oaCyaibj4plyxoPoGeUps3FnL446qL+BIR  
q9Jow2vpWBDeY6Bvb9/XLb+gmcelGase+tesjtxa0s1ZKPHY1IgFkibrmW9N  
WifjbV+WzROxELFr+VLJnwyD/Vfz6FQs/D4WZESH0WPSTgqdObaxwPtyvmr2  
GSu2w/wnjN87FsQLW5WsxQWw6RAXI7+gWBiSyj6RaiuC9fc9E3gUGQu2srjg  
ZmVx7EZqzqBBaiy4aTNvfzeQxbRXeWSDb/1f/5jd5ZEKRnxz/MeTD7Fw/1j2  
6FocYJ7aZI53vsaCZeLZvcd2epjR3d7+3LIYOONKJtN2TB9jSbR+5PInFhbJ  
K7t93htgWz+4xAz/xclH10mz+duG2KTl56ty1HHgEtHAEot/AnvefoeG40gc  
5FKrFiRLGmH3JAMS9znjoPunb0jUFyMs74r88g/BOIhzFFYknjXGIvbWPYYk  
4yDiTcmic48xZuffOtKsEAeZC88yIlgqNMe13SUZl6nHQcu/cwdNVI0xI1+BJ  
NooDSupdBxg/gVFU0chFGB3607Fc2bU0xBZZh0odT8fBZfamhkQ/fexNUgGL  
nn0cmFjclh5KBKxx3jFDxj00yhkil2/idLEbNoJ/WPziYFTVDbdVoYWIYN8D  
d0PjgCd9xuC+IDrmI1M9OR0TB9sbVHttvcrYyclwi4GkODBzXT3dKXgMU/in

0tWQeQhkmlHVsr0Mxha0o1pyIQ5Uro+czNUXx7ZHscqMq3FwGnfMX7JbCPuM  
y+ANvRUH6ooSA6wB3FhXzckLdnfjg/83LNP0axYFccRElQbB4b/gjk/pdfj  
F1JHoySb4qB+/6J0Whk5FvWz+AdTRxzs3b1kep+42+Fof8bxz4s4yPh0t5hk  
brVD97n4wNfBOICF+qT7lj86ROUWdftG40DY5MLi9v2vHdTXHj56NBkHqze3  
eW/Wf+tYlo0RK56JA81zbeEK0j873oVoF6UtHcZjw7UpeG11tHz4RxP00w7s  
TS/0NxzykxL9nkTrvTi4a12v6Delw9Jrc5e1KeKB8lzOmH4RK+bPbekpxhAP  
178KpZfz8WDMzZlG6dnjYZA4uCIKowpLY8b/eaLBw6X7pEjmWIYp1P5k0mx  
eEgsYH2zTC+F7XX7yvUcjQftYx8nqHNksW8KR8tqVeJBR115+d5Peexl8SpL  
kU48TDkK7ecVKmIPKJozkg00/ccYCTY8ytiV8MQ/fmbxsF64MWeRpILFjkOQ  
hU08fL35FSqfqGluJ6g+a7jEQ83yVHJKrxoGjwYshL3j4ckVqpKDMnVMku9K  
F01wPFjjSYdbjmtg9Fn2amtR8SBUQNXw4T8NbHWVr+oTIR62Sf163r/XwN67  
fOPtSo8HJm9zo9FhDaz95b0LNbnxcMtxNnrlsgZWrhRCUpAfd18yPM4bM2tg  
mSVK0Yk34oEud+71XzN1Llj6zw/vO/HgTFcVexTUMIuop47mNfFAUTX0YnNe  
BVP9nDagWh8PQJmzlaCvjPGYGCOBtngweUfi+sFEETuoZ3hM2RUP95gGdp1W  
j2IzAu/Ell/Fw2j6dqVqsST2Kuda0fvheEjXknvJPyCM6c+vXNH4FA8vkstl  
uvCc2FNjkwvXp+KB5vFeRpw+FVZHtXPWeSue5o85wa1UaiTlZ5XSvhUPI8NO  
fiUlc6HynmoC/0E83D+xZ3v2qAjKz3CO/MKQALnzbzS+3DyK6GfqQ3DsCaC9  
Yie9lKWIMgzoA8r5EkCSjvFv+Zoy2r/j7U0qlgD+uj/GjdTUUCzZU3cv2QRw  
oLN6K2qugVY82Z27IRLga8Z1sRd7mijgeYiduFYC9OuZZ+wxaqNvwj2WmZAA  
Xil6wn0p2sg5VcB81jgBKsV8/0haa6ORrzHGxhYJcN2kn5YnUwuZ44b0q+wT  
4Dv5r39sfjqop1QS0bongPvcsRLmFHWEDpK1gnwT4OnWVSrZRVXU4vZBdSAk  
AUiVhXAeripIseOYohw+AeSKB040jCkhUeKU5HJ6AsDqOaaeZ/Lo5oSmqEVu  
AuDI/3505zqK2HWuCDy6kgAnZ/HfVjql0YUbc9wsxQngVvxHKv6pJKLa1WOP



Kk+AeP6zD/7QSqAUpxtHRioToCicKzysWgxtt67TqT48zFceanm3QBRFcptR  
XW1OgPPW/7Fk3RNBi3H/kW51JMDkK9wv2/CyPvD3z37ngRQ7W0KrjARRpPq  
ttstgwngrVKpfVcCNkVPdjgHk2AF4/WQx1dhNDQJsVKwkQCvJ10zPMMEELG  
dm6L49MJUC9A84VpTQh1Njb90FIMgKHdqCjGFGGkxc70rWQtAc5sBB8RNhdB  
9dF+k/vbCXDviWcmv48o0jqCfXAnIUAbUy+bx4AYqlDmGnlGTyDGBqZd4ywJ  
JJAfPiR8hAD0G7Iiu9ekUNFa76s0TgLQ0j2W/zEig45YcfdMCxCAyupASVda  
DuU8iu80kCAAicYzh75QBUQI2mhVCXA8mtJh75MjBQxlFbvp0MATz0tHv17  
yihEYby2V58Ahh/PPGvpUEE/LihXS5sSQLQ4zn3skL+7/8qtOGdFAHzscfqB  
HjX0wfx72aLjYb2VZeM8j9SR5QOdm2YeBlj2CfvGm6mBXtEXFj3wJwD/TLLq  
Yz1NpB+8dIUxnAAq7pXzz6Y1UXu/4YWwWALM9f9of+ynhVRlb+W8SSLA1TDn  
Oy2vtVDtuc2zipkEoPD1nw3l0EaSC6dSrpwnQN+owLq7jjYqM7lHWC8gAGHm  
4jEOXW3EXXUQY3OTAI/bBmj4uLXRFWqHyMY7BCBP/jG3+0oL0fk/DOGoIQc1  
3S91nKUWSh0LlOeoP4zfw7qlcF0TbRml3mBvI8A3SifjyXsaKKR+QpG9iwB0  
gbQ/xRPU0bTw1V62/kP8cKH+c/RqyPHSaXe2dwTYmXiNkR7e76F96k3WcQIO  
iZ2pW45XQm3jBFHWRQI4j1NQsSzLIsWTqk9Y1glQQVuk+/m5JLrX8suCZZca  
LafOjtdniKL8Qo8kZrpEeM9o5+a9zoZoyHnZmVkToXyMLGR8mQolR47UHOFN  
BMfm5rCelXndoNNGH5lkE6EhSdxz5xMtNvX0XxiTcij0nrrO/5LljtkffULJ  
pJ0IK0Z7qvLefNhgcvQJo34iDLn4WwhIHs4vGjkVRtNEMD/3muJvpjWGvuj  
FYN1Iqzdf9R2bFgEU/hR6sHgnAjt3cyR7dQiWIWN4x96r0SQFQhtmXYRxHi7  
WC7SByXCFWYj7/4yD3ZZcUCCpioR7nXrXyzI4MCoyjLa6Qij4C/nTH1DgAUj  
MijruvREqFqLDkiOpsXWE//M0+YmwoTVCxmqehIsYpFRcm1+Iqz2CVknXlnt  
+OIYxEl747AfyWVlmzNPO2x7xWpp7iScliXhQsbcD91+tc8GNDWJwD9rIHL/  
5qYuVBSNU9cngmRfpnOP0oFuM6tlJHVbInQlrWWTB5IhuTRaGuquRBCdte50

U6BE1a6Sqn6EyH9cj5cD6NG3O5ENap3h/kZK3yzWWjRxUG1QcrxRPBbIVy/  
9I8WUegc8vDpRFjvocOtCdMhQnXVDsViItwQNX625EaLVrm8LlOsJ4JrkVhK  
VyK18svik6LYTQST+oKZ+gEKNPl7tIOcjAgu1Hl2B4MkyNr7oi05HRH0T+2G  
93P80e0bNv5JxkoEYkZsb1nzd10EpOlkvEQwfP6vuY/tU0djXR3meihv/Tl  
bQJhp0NWAP+QVJYImt+1+V7nUGPlefJGpMpEaKVVqRxxYcE4d2cnSbSjkP6s  
QUqMmwsj++BER2JKBL/df2E7gSJY/Am22/+siGDHQRm45S6OLTcMavxzlkJM  
YL9jhqUUNn4Z53sQSISKC13DZuzymOW/7b/7kUSYesx7vGjiGPYytD5/P4EI  
Y981a38bKmHHJ4NI9tOlkjCuoRb0XhmrN5Xo3DtHBMGnj7T+dqlg0k++209d  
IULmXf486RIVrFTq+q+/xUQgv0dlZTevhrEXWWX8vU2E7+L+R96/UsfyKOj5  
/IYToe/SO5npDA2Mia8Exh4TIWfk12okmyZ2WUne7+ETIlhcOvjSEqOjsZpg  
eeeeE2FyUuysUJUmVuhu8dj7FRG+jBFD2Cs1Mc6Yqfe6w0QgLZSWJQvXxK7n  
Re5xfSLCuqKRme2eBsZ7h0x0fYoIbi9/u8eaaWAlrQXGg/NEWA21+T3iqI4J  
vhEPvbdKBHu9tBsfhdWw8h9N+anbRNB1vjW1UqaCie4ZtTqTJEFHmBlHywcl  
7C7rx8+qNEnQr++7TjN4DJOWCSQ/wpwEvIr3h9Qrjml1uF3pBa4kkEzvCrx8  
XAqrC+HH35JKAsguprdj5cMUz9YWxx1Lgs73s82qgSxYfTF6ZqVxqlDr/YOT  
fztaXnrQURknwdKzCLGAx4xI+/PasanTSVDPHSatlc6Lnm6k27XZJ0HgnTXG  
pXeiCNGxJxa6J8ETzvoB5Rpp1Cl8tzzMLwkELwiKORQoIH0N9ZcmYUkwxkmn  
/YRLGb041ftTNDYJWHd//CZTUEVGPo4s+0lJQLRzuomlqaFXhAX1D5lJwC3j  
I7/Eqo7MrxBch19Igod4qvt539TQUcV9et7VJPi4ka/1eIUvVWllb63kiBJ  
f8GitVUFvRuVf427mwRqNSxhDrHKyPYnts5TmwSkRxxKa2SU0HtSS+7fjUnw  
4tzjs953jyFH7m+6Q0+T4PHK8vKnaTk0oRDlXfXisD9rwWwNCVnkfoL8XPpg  
EjRmqlt5NUuhKZfCOtFRw3zFUv/R3pRAXIESo+qTSRB1YY0oPyKGZnKad5hn  
kiDfs/DLa3dR5FdmLPTzZxIU3SL/IHVcBM03fTTs2UgCfC2PN6uRMAoaDAwq

+5sEX99ad3tNC6Jf07uXEsiTYXCzMnboogCK2MlrsqFPhteiMbVhFfxo/YjA  
hDxbMvQ/2lM1VedHeMk6Ehq+ZEjcTh33d+BHW8dxktOiyfDM2jB4iFcAxdu8  
NXsqmwzR3OcaMwoE0W6gZ2SRcjJoD/c9NwkSRsTU9aII7WQYEn/7LmlbBP0r  
OvvUVD8ZHjX83ZjZF0PptezT4qbJIFmzlEeaYkoXtyl/meVDBcDYzleXJFB  
WePq8p+ckgEL1WlU+SaHaNZ6rRs8k6F2YZDHVkiR5VI7xV8ITIYoWQp9w+9K  
iEFw8ZZ/ZDKE2KcUVN9TQSxmDAAt8aclw/Idi01sFDVToeYtpKycZLpN9pWJZ  
0kSc8Qqqby8nw1RKZ0Z3mTbivWuZklGeDELMjDTECV2k+Agv/6EyGXhquu8P  
6+OQUfv1CZmHySCqGbiSagrI9eXtc8TmZLDVn0xMnQMUNTYl8aYjGTR1b9+x  
idFDOZMUsyI9yZDW5lXVuaqHSuekC/GDyeAm7on/5KCPGtfN9XtHkmF/ZvLX  
wyp91L8fscozkQyX/Dj37L7poymaq6Uh08lgwHY66/M/fbTF9sT82UIynLR7  
Ee1IZoAYhD7vsqwlw9uij/c/zuojUVnSap/tZKDWD+Oluk+PNNUkHFr+JYPg  
c9Hriqf10Wk4SUIHnQIGyVx8cq/1kl9ZaIMrUwpUfT+fiZfUQwT7K54POVKA  
4NKN8TkCuuzZdIRMIAXSNgRvX0tE6F7Ipw5b8RS4WtSH47h+HL1LF+HdVU4B  
D2fx00XfNdD8hRN95topYFsYcWLNTQ0dXA+MLdNLAZnwabFrz5SR7MPH7wwt  
U2A0+j02kyuLoG0s9ZpDCshmaRrtfxVH9j07CovuKYBPLnl6RFsQpU/o5V0K  
TYFOm/kPsfP/da/P+mpN41NgKqu2WGN2o6Nu7dycKjEFDjqvywk+Z8Ze7Nve  
zT6bAr+EWm1MI/mxCep3Bu05KTA/xYP/JSgGrbNurcnlpwAtp8Ce5X1JjEaQ  
tzyl+LC+hz+ev+mTxgRl00l35Skw8SC6JzBZBINV9doTr0oBgS09VEKD0pgp  
Lqsm7mEKWNccLdN5Lol5mNY49jenwKNvyf21VuLYeY/1xvCeFBhM4g5UzBTE  
7gRzencNpkDqq/OzwkY8h3xFm4VjNAW+uK9GcMyxYUNp7s/8J1Jg+qyq9tXf  
DNjM+fTQtukUCNUzX3FkJ8d2r93jY1xMgYs/1xvqXv/uYP6v/9WZtRRQpP42  
fNbjQ4dk3XJc/XYKcC66pXz+Oq5b6kpbQEaSCskn90xuTK/qynjxLd4nT4XS  
Hg6mtl1t3UZ/eT076kN5+oZCER0JwoXirh/QpclQ87u5Hm5y1B9ltVLJlArW

SQ+HdjMpkV28t5EVayrwair/+6pCjaaSYm7tcqSCpJXTVWEKGhR8Nvv3fzyp  
4PdRrNb/IzXayik20yWQCm8/X/byyKdCaRfv39kSTgXXyLLhJjYKxFDYsVMm  
ngoHd05zsiESdK34jeVJ6VRwptQpNprd1BUt+1a5fjQViGly+kbWU7q1FRsH  
N4+lwuSbu9STK986NGso7U+opEKnbfqtoif7Hd0PuWqX1VOh1ZiOnz+ADjvd  
JENxXTsVxA2T82sk2DBH/aWqyygVjrfofG5q48E839SdOqefCqq3eT7+VBLG  
8Asq1wimqSAgeLve7KMklhy7pRN9OhXOa598XsUji2WTP5kKtj7EQ97YQt5Q  
HrshgGTdnFOh9jHKnylWwipqSN7YuafCe8pqQ43fylitRnf0aa9UOFPjPHpf  
WRVrfpHJbeyXCldXmRzJrdSwTiuTDlzQIZ4Ek6UxE3Ws/wudl2ZYKux2v/k1  
xq6BjQS/plKKSoU6wzW3kEca2OT2pfsysanAEL2jS8alic1mWluKElKhuUf1  
EomhJrbKyrHJm5wKog0r1m+VNBgdsg/FbOmpQFcfmzv+RQMjk7+BGLIO/bU4  
NXIMNDCGNtfvFLmpkI7xOuu7qmP/o7jK46H8nzhy575z33fuO/sx5I5I0uFI  
RCFFSa5k1x527a6lSjIk5YqvSiXlSalkCUISpliS5liQ9Nvfn89rnpIn5v1+  
z8wzMm4qWX8ZbP/7Pb/iNS0xlF5Phku5GbB4mcifcZ79/3OgvHcmPwN2fSMU  
vKk3xcxmlhMnL2SA8mD59bIVI8w+VU9h9FIGpGQc1Ql308dc+KcfDV7JgOXx  
N595d2the9TjBTqr2Py4Mhw+YNJYekBq8Y37GZBgcy1cckIGZY3hHK81ZwD5  
tLLLLyU1lBvHMXHpcQY0E2wPibVoo6K/rbSC9gwYfHdW7YyvISqnkYxznmdA  
0o2LN4Q+mqA6Wfd+yssM6M11Ndklao7ulQsmZ/RmwHgvI2IvyQK1mL5USn6T  
AXti4702OVqiTiynNf5dBsgdnBs/52SJ+rf5HYoezoDh08LGXVQLNDwoJRT+  
KQOGWuxyxPzN0UTE2/rALxlwKOVQiQJpMzQ7f2GX/7cMwF9Vvarea4JWzwSt  
ev3Igf+aXfbRwsZog7DKZZc59vdqjnVePGKIhIo+bUWLGRACroywDj0ko1P+  
1WolA24aitjJROog1YZIhvhfDNhC2BD5018L6Tnqmely4iHUUvt85pwGMuv+  
PqDKgwd6VOIWCW11ZB9Yl7pJAA8HetWK/PnVkOvXOFUJYTwI3VxZHVdWRT4n  
zdsFxfFwd3+kkOQNzbSHaylqgzQecCvxvLZHIFBYTqPImhwebtC/H59lKqIj

iqm3fynigZhUOfpDUxGdrMLt+aGKhW/y6SNfkCJKt+L4+0UTDzW9jn/oPxRR  
1pPWKyO6eEj/09F+3lEZ5fmSXN8a4sEyNSFyWEsVFQ+7fX9lggdv1gOfXUw1  
dD1akNVhgQeVI5oTjDAN9N/vLovHNnhQbt4U/6laC3H9G1RKtMdD3MGtm9q3  
6KIA3i+8BoCHgILeC5l8BmhN6u/gOTc88Hptz66PMUG+igKtHtvwoHr0UPL4  
pCm6qiFds74dD55ejyPrIsyRp9nm04cD8GBz01DFe58VKrG1jVTah4eDczb7  
XF9Yozlw8ekLxkNSaGqCspktnbfYUM5gAdm4Ny1yWw7VOgTrGYfgYdbDoXa  
DW+2oOmAKMG5w+x4UbFGBUi45BBycuHaETxkWxxdvLwZobwI/Id9cXjouSEh  
cc3SAU0cYbSLJuCBZ/rBSz9RQHJYF+raTuFhaOtMvf5xQIzUa+eTU/FgrlaS  
UfQY0CjhZobRGTYw3J7TPv8BZEFrjhoj4GFPSqzSVhVHRMl97ldlxsP7tCzy  
mp4jGip8s8WbhgeKhJyUj7wjMir9pMnFxEpt+iap1BlA+Iofwvdy8fCMm97f  
Ug6ov25lKSYfD0ZfY66GbgGke5dnVPUCHqwHj16yPOCAUpvFn78pxkNC5aD7  
fh6EutuUbtFK8XD+mdgXbL89Uu/Su+hQztaX7tyH6wl26ORrS+KvCjzEuGo3  
9kbYIMXP3gEh/+Eh0l3L5c0vcxT3ba+D5G08GG9ftXxRaIqezEbodtxl6204  
wdjZzwhF/zu9aorhQZ2kuWeflSbCeGljE4/x4L+/P3F1ozISFynoutiOhy7T  
ijVahiRqVKwr4XmJh9HqVd/TMe+ahTSbKE09eCBf6d3Z6M6P7Td4GnesHw9N  
h8l7K0tksFtmfXs1B9n63/1NyVtGFe01G3F69x4PP9wvNFQVamb7HacMmB/x  
QH28vruzRwu74b4ktXUMD1Wtm/j/w7QxDl+u9d8T/9fbVNvuMG1s526RyRtT  
ePDS84WxB5rY9RD5ngMzeLDbtMX2v+Pq2GqE9n2ZeTwc/nPfiENJFStNQNkZ  
K2w9m08qhxXKYL9SPRMs/+JBrSpoUa1MHHPLDAie4iCAk6OqwidjAayIFuZ6  
mZsAhzkwQ9u/2ueyT1q7M9PgHPP/EUEqDPNThdS5ASECNAzG321V+1mc34p  
mRMTJUC9ef2RxadfcF8r8qaOSxLg3yp+yqn4F87+v5LXOrIEU00MvNrutlZj  
3a1++EGeADSuo/YKpzjRWPPda7nKBBD8OGvitIMbWbW3MI3VCXBQtG/Lwb08  
iNbVfeqPFgH6dWq/Cavxo6DA7Lp/egRwTjqpaj3Gj4ym3L5sMCKAhM+h6dFs

fsSRzK3Ib0aAriq1z4NLvKiP77GfkBUBVklbC6b/bUDIbaepYnYE8G19a/ea  
5x8uUcuuRQoRAIs/Ibfl3jzOvWfPSc6JAC3VLQn7g5/i5Lfe3qzkSoC+3Wmb  
HHjmmqd7jx1U8yRA0qa9RtQgbgwLNbyotZ0AHTXIDiEpYlhY+jV+owACEBNL  
ivfTILCq++fHUCQBrCujBpd/GmAp7v7yW6MJgOgHT3yVNMa83ortcDtKAKNE  
vtJcIVNMOflZdtxdrwr5/7jSzPDZn9RMZ9EARzibUqi9ptjrZmuiztTCKA9  
9najp4Qldk5ig+GedALEflTOVTKxwiKvPAoLihAAL3Dz7EZta8zGJO1CKJkA  
zW81Nzn9tMYEH9n0HKQRYKrg9LIGxQb74L3IG8UkQPdZjF/qmw1W9+EmLjaP  
AGYK31VPitliGTFHE+ILCPAxmVeuetkG81vVrzlZRICLa5Lt0pdsME3q5Kfk  
EgIYz8r8k1+xxpZky+XSywgQfkXikiK/NdZxPdSHcj2thyDBxNPtlliRpRKZ  
XE2AzmOcb0oNLbAjbe8e0uoI4P9OoOybjRmGdhYsMG8RQL1XsM9+gwkm9tlP  
/+xdAmiuWb7etcMA+xwneuB8EwF+xcdGBOzTxhr+vTh/ESNA0J2GmSg9NWy3  
kgtP+VMCfL29653YBD+me4PTvrKTzWcu/7kN3r3Nq3bY8RvdBABn6mDRH25U  
ssd6tGGAACIr01ZhHGoobnJB5v4QAZQqNzTf/KqNnBLrvZtHCLB7zflG8gtD  
JMUTS3z8mQBXFhiVcm6maOKs3oP2CQLoXBOQVWGao0b1ibnnU+z3N10tGBS2  
RLSbZbrdM2x8fPfpuDy1REGwf3/fPAHqPIyfh7xniYxeKRQMLBGgl0c9zfqT  
BeIIGewawiWAW+WVAZ/L7Pt++tyGj+sEuKMTrpKyywwlCorET/Jmwp3y2wo+  
/sbl/UJnxXfBTDD6o3RoV64hkteljPwUyYQPWxlml17roem7W6V/SWRC5sbM  
/KAIHYS5cHgty2RCvvhgoqi3FmL1PySsyWeCcAB94A5NA4WFJ9/nUMmEicHL  
DT7K6shi3nKWWyMTRAJejv/hVkm8+HltAZ1MWHqaeI1LRhWNjMlfW9XPhOrs  
Uya7Limju65bNaaNMoG7Lugge9MhZlXMIWGzTGh/V3rPsVARRQqdU3lllQmK  
v9z+/HVWROjYw0stdpmw5fMujvXTikimb1zhFsoEf2r3+V5/JTRjIVx01SkT  
Lnbfyen/r4yenreUy3fNhNIXfAc25aqiktXgArJnJtiNH/vzU0kdJQaTpZK2  
Z8JdDWnOHkVNTL2lLi/KLxNq0pL34Qu0kbbGW7HAgExoveyael+ih9ZJ/5he

+zJh6vQXRfxVQzTwVUcYhWSC9k2fm4X9xohclySgFpkJrKNmLKahOQoRv0KR  
iM4EQvGjDx+7LZBVwnMe7qOZoD54ZUQ41gpN2MpzTZ7MhIL3/S2WTFuEFTtl  
DCZnwh//4IxOgS2o4F/0+vPTmWDhUH07/rg9Ohp2Nu0BPhM2ntjdmSGQ67t  
D1ZvkDLB4zmHxeY1hJR1x5NKqJkwm+XumSYIalkm9DuHkQmi+SkD9zMBdf+w  
OInPzYQiHi2nBPa9f903eOF4fiZ47nwilmzuiNjvk+IPXsiEd0s97fkRjihA  
pu7nrkuZwBH1fPx8Kntfjw/Eul3JhER13TmvE46I98P6d5trmfD74uGjBE9H  
NIJ0ovWr2Phu5x3l+Qfo7hWfrwq1mbB8M+15ORMQkzspUvhmJvSfYQbtnXFA  
kYdKx9cbMuHsp1aNgsMIoc6OsNnGTChJYfzcd84eyWyeG/30MBPCS8wXGuLs  
0NN5x+G2Nrb+jIVruDFLVLlR0vBuBxuPTy3DdjbmKLEx711FVyYcvzXMw1Vk  
grTTx97Q+jPhcxpH3y03bUQWIHX7jmdCi6hIAT+zpznkSK2X01e2ff6L0095  
fszq1Zt08+lMaLJpKFN7JYuJmK27a81mgvW3lufRU6rYxDntZzK/2Pn/Ilgb  
ndDEsN/bXfiXM2Hnsbengi00sYJ9p56s/MmEhlhsbVlcBzvafNnx+79MWP1q  
Xcqhq425qnY8+rCBCD85qLxC0xqYcuYsrpuPCKrSA3VTx9Swps9yDx9tJALJ  
qcRU5oUSdr0mqrFMkgjzTrRwdS9JLF0kz+qcLBEC1N0fOrZtxALimxpIckRw  
vG/f8yOLEzPq/2x2SoUI8k85SAEGc8181htvHtYgwujD8DAnn+ZmXanTJ2R0  
iLDWs6jY6z+085ybsWzTJ4J2xp32ppkF3JHu0OV4IyIMBV/lM7v8B8es6WtS  
MSPCE5PcP716nKg+y/n0S0silM4nj78U5EZ9EXcdUm2J0COffrYpgBf9ctLl  
0sMRgfAqZ7h9jg/JqBa1DQAR1q2unFdq4Uc2fzdSiM5s+6nygp/X+NG+odMe  
Zu5E8LqX/V8UhQ+l3fu5cXQbEQoVPe7dd+dBJecOdDN8iFDzspsg3M2JWuJf  
s7bsJELKJ6Vurd8ruM/bXXZ+C2D718+MjbyZwnEb3pM+v48ISVcYOuGcrc3a  
AnqDziFE4PvdKNTnuNjsPIFUNH+ACHEWcR8xFg8W/UQouDSCCP5jPuWDiWJY  
3enZT3+OsPHZX7wnyFgR69kXVl4VR4RnT2WK+sXUsHnr/sjdCUTYYfBb01pA  
E7Oav/f9Vio7v7fvVzQ/6WF7XunVhZ4hQnpQd2xMgyGWcuNinEgmEWT17gSF

HzPGiqnC5g/J7Pi1T+pEeE0xLPLMYhSNCK8ESjbscjLDRrf03ZNIesHdOmKZ  
HmWOcamFp7TnEuF6+7iBLMkC01zvtz+RTwQbiy8lu2IsMZf3rv9UL7D106x5  
mt+evc8bGx93F7Pxxwc2nB09aYVn5+sS0UiLc6d8i9CHKGqs+XuyqX06EqSs/  
6RtbrLEuHxGBwQoiHGr7c/jEhDU2Y5jxglRDhOTA7fwX31ljYoLzDPP/iBBL  
ftMnUGCNmU2G+366RYS8g2dM3OSsMf+2NxI5d4lgIW1HHWLF44IX3N7YNxGh  
7N6C87ZQS6ww/f75qWYi6MYUvVBVscCaAg32FT4mgrSPIulzvhn2weaSoms7  
ux9GNFOWH5tg69KiHxc6iLAcXG3kemYzprqQceVKFxGKIzV8toEedrD2oPbf  
10TImtAknDFUxci0ga/Vb9n2WdWoUx0yWOUh95o974mQURJtzv9dAJtWMzRp  
+Mzm0/QUtU36L07k36X5AxNEUNRzeLXnnDgy+SB6R3SKCKv9A/WnFhRQQsGC  
bcwcESqitntl7tFFBSci1uQWibA/iaC3PWUzavR9iz1dZutzp7jMijUpGtrs  
gU9YY+trOHaBpm001gQfbFXnIIgo418D3SQLpPzVklDnAwnqzjx6dEfXEKf7  
ScdpPhJMFDbumdtaorAysWyDjSS4R/+wfkXKAmWeIXi/EyHBaC2DKV5ojjTH  
y4MHJEggP+d9RTfYDLW5P4t9LUOCTqe+7WkKpohbQoj5UpkEua+2EBR5NqPy  
RKOSTnUSYJ8k9/YG6yOX9751z7RJ8KA1CUuZ1EETDiewNn0S8FdtC21s1ULk  
8vzux0YkEMmnI9pPDaQt0DiCmZHAMrxl72ysOnoWOzTzwIoEDml76qdwauhw  
39p6ox0JrHS3VHF5qSj+axXRu4gEoVbB+z/OK6PKi44qt51I8PVy4tLwRSXk  
wXHQuN6VBLdvhk1llCuiqYNkh1pPEvDIPv6bo6ilaM8rfaq3k6A5zHzjIRIF  
pG/0Yn+FHwnw2/YMV5Upohd5P46VB5CAGdfjFN2nhI78Fs24so8ED5e2CDbd  
VUFCQWaskhASyOKV8LtM1NCNFv/Si2EkEP9wN61iVh15a52qL4wkQYCK3cf3  
mlpohnqhJT+aBIRXalTd+3UQc+ZBT95REvi+rbm1/kQfGe0cGc05ToKfmwRO  
b0ncjF7d45ijj7L5s3Z8+/qYCRLDu4hT0kmwXP15fC/DHNV/OaRGJJBA8yRZ  
7bWcjfL1pJniySSgbrO6Y3XJCuVKvtqRyiQBTdUmVZRgi8yS5g4k5ZGgUdVj  
dfN709T3QfL4yQISrBqPR1GV7dFxRyvC8SISnHp10C7RHYckru/JO1ZCgpGb



urxD/gjdEkwt01JGAnX+sOgxewe089ilW1HXSZD3aFj3+R8H9Ov1o9blahIY  
xJT+KnMFdM7mc194HZsfrUI9WiL7Pr/EPRZ6iwS3GLqUU9mA3nDqLATfZdev  
oXnAnf1/kBjpsSGwiQThEcEbhwiBybyIkdyDkcD89fV3ApLsfW7M1NjVSoLP  
b685RHs7oN3n6s39npJgW/Dh8ON6CC0v92316WTrw9Lu6cQde1QYvLjTq5sE  
xJAWUcKMHbjplT3o0UeCsdXktYGPNUidtl2C6wAJlGk3aztqrZD8bPo5GCHB  
BvBkRc6bomlC/xuLGXb9GX4eLENIZD+p/8V0ngSq5/Y1Ht4tiYa3eS8aLbHx  
212wo2qKA6XXH+MxXCVByzVu0/sdY83K0nnSeusk8JEJXBA5JohhyQ1a2lXk  
4D2Cv2TyURYLGmRw10Alw6ExmpfxflVs3WnFRVWQDLdcVzY0hmlglysUApRE  
yKA0uvGk2aomRiNTqgfEyXDxe3zwBiMtLCFiYT1Hmggy+c//S9LUxEKc9+/0  
2ESGyc0PPP6KqWPuGi8quJTY/ifbvRPrVDAzLuu1B6pkEOwWXsrQVMCUPpX5  
ntQkg1+ED12eKIPNI6SsTBqQoawijWfxnwD24fSE9xVjMnRwcdRkXOfAngb5  
le0zJ4Pi2WWF1nuzzfVbsCVJazJkDdQV3fjqqb4or7/tpR0Zbnj18HH/GcOR  
V/IvKxEZbI88/kZW+oWLG+T85eBEhkrdwbvXZNdw++7Fuq+4kGFqOLPyWCgn  
ci54V3zLgwzrRaGIne7cyOiky1yMNxmIt+LDrlfxok3+N120dpChP1ubeeYw  
P+I2Vyoa8SeDFGomNSBaAM2IU2f07yGDjZJt6bZzAmhw9pfTjiAy5F092X76  
BT9qfRV6XjCUDPIUyT6hRV50o67r+5NwMjwyIkTILW1A5xk2cPoQGw+OMJRx  
6B+OckT8nFUMu552ZZyb9i/ckW1i334eZcdfj5CTevEWF6Cfhqs6ToazwiU+  
zN6JZhD4mhuWSIb69BsNUq//Net/3TmhkEIGzVcTuSLVgpj0s0d2b06Todu  
8eDBoAQ2RTw/5kYig9lF5atOispYf/gGG04qGZTDSdvSPqthj5y00ZvoZHjQ  
P/jzxE1N7ByHm+Xmc2SQOUC/q6irj6V/vEWdOE+GnmeRhQ5ththhTHnk8kUy  
vFI7e/XzVmMMI7ZElrhKBiHNmH2u300x3cCw9y+uk0Gl3ryZ66cZJmHXbUyq  
JoPcGDheemuOrcnZVEEdGXJdQ8tfXrbAJn5fG/x9kwwjqfbjhs6WWM+A+Oab  
d8iwoe0pcd9jS+zBndP46PtKkAydFViStMKun/v2RqOZDN9Y1b9LbKww1old

+sMtZGCdn+j9ZWCFpfg9Ti9oY+N/J1/x/JQldtB082ufDjIw9asCteItse1i  
F3QEusgwYyMh6fDQArP9yZ3W+ooMC6qtTzM7zDHN7rie1NdsPWpUr+blmWEi  
tR80Ld+S4QPhgZmQrCm2nO2ePDNEhvFR8ZMnK42wz9ENLytGyJBu2do63q2P  
dXmoqh/4TlaicttnVc3a2D1deqL8BFvvYu0mwynqGH0iXIXxg833eMHg2JwE  
ZhkmGX98jQzqRM43C2WSSFv6u9AmDgqokk8nbduthGQ6WisfbaCATFuD3W2y  
BuJNLXK05KPAEc1fw2NBumhp8/FRoY0UEHQSUU7W3YwmRj3SbotQIPCdU9j0  
OxP09qya3D4JcPCTx3haC8xQh+vKbQ4ZCvxYs7zSh7Hv85Uen4pNFDgdbmeh  
7GeBKm9UfvdWosDI2lms3NcCXdifQfmlSgG593scI5vMEU1ij8ZFTQq8YQSF  
zWswQyntxo8cdSIQK7dCfnnVFEUn8QV+NaDAnfYylbsMExRo8HGJaUwBB707  
TYXjRsg+l2n0wYoC5Wbfcjbs1keGzpGdBDsKXFpmnSlR0EVKv3GReogCVa8a  
AlZvtJFitTRXjyMF0nl65ScPaqL1oB+XEI0okFL05cXBKXU0I9puq+RBAWXm  
fNSJejX0sbX4zRMvCmwe/f1L4p4q6jmZEB/tSwF1F9/W2l4V1KLrJSzuT4Gv  
+7Zed4hURvXvNaru7abAK48dDzbZKKErzD/OIYEUQEaRqWk7FVGe4+tR7v0U  
wGkdDa1sU0CEX9VpNWEUiNu2a3z4vAl6XkGQ84ukgHMzHz74nQIK37evYTmK  
AhfPx9cfyldE/sJmvpdjKaD4033aflAJObcITLvEU2Dot8J/SnUqyOLEJ8p0  
AgWCAuVtr4mrIS3t+xpnkyhwrXLoLWeZOpJ5x3pkm0aBnrm2WWemJuKlHw4c  
PUMBkyN+2x4NaaMlBL/JmRRlyDZ3ou/SQ5Nzsmc3UyigPWQS+/6TAerY/awz  
hUkBXe6Og4N0E9QoeDISLY8CZotr592GTVFVcyjXRz4FznG4y/cYsPnV0LaT  
vkQB5iFdR1KjJUoz+PvmQSkFUtsCOULmrFA09U18WDkFeFDy1kolG7Ttj7Hq  
vxokvKd6Zn9zsUP2ZUEuAf9RIDb4cDXdfgsy3GXxae0WBTbi+jY9ULBHivxC  
p6/epcB4/baXnSP2SOjBmJxnEwVcA3EeAQQcWot90DDbTIG+qRMyezYg9EP1  
rO/5xxSwE3nY3BmC0Mjr6GlcOwXmTnx+VpmLUDfZKWu8gwJfnbebpwsRwmzl  
NbO7KDDRsqaTG4/Qf9Nzj0x7KLCTh5bDkkOo9PLzwMHXFCC66p7+QsMhlt+V

3+lvKeBvXp5Ma7dHGTzJZ7XeUwBSOoVT2reg+EZf464RCmQ9P9RaR7FDYTG6  
L45/pgBfj7uqhoAt8lPmOLRpGGLCUUOxm3yt0eM9Wb6iUxTQMudIDthhiUzO  
itnxzLD1fC1T7reVORLhVxOeW6TAoKHwXEvqZnTaqWppYoUCXVt+vnnVpYum  
00xHP/ylAKnFr6Z0gybqnHO83cGTBUdL00Z4zkghW8POYkwcG0ruvuFz8+JB  
lZF+5AbhLMg4TjXfubsTJ3tl6Fi1eBbkLJ9ZPvqOEyO/D9tbKp0Fr7493XuH  
KoEtSn93KtiUBTrNut4aK/LYQd8ThnSILoJpulQbfkwV66P9kSaoseMfube6  
R1Edc2zP/HdKKwsG0CdGfKY6Vv9v47dYvSwYdVI4VFuuhinbnesL35wFrnfu  
/+jyU8EYCYoP95pmQRQ99njfH3lsra78mo9lFgScJHiF5shgMd8Mc1xss0Aq  
bjk1UVgCG9K4k7QFlwWeKyWc+t0CmEclLszUMQuGHnwz2HqOE2ssbN+m45IF  
YXdGudur55p1XntbKnlkge9Lj54l3SfNBcIDypLeWdCyFLFj0PcLjsc9hF9g  
Rxbc+LZzw4fTi7gEwsTcun8WGOa+u20isI4be3j0/a89WVBQMVdw7SgX8vu9  
1DYVIAUzZY+5zQJ50GPTM3WjoVkJuij/uu2ZD5kc4Ssc0JgF5LrBmZpTAujy  
9Rx81+EsmB5+42wZLYhEPsnGtB7JAs2zPx7XJQqi0wql/o1xWfBweNUvMI0A  
Te/SRXUJWeD0cnC8KowPBbLqdcqTssA5PuzgM25u1NlpI16UlgXVt76kbaKv  
42x5Hq/mZGQBl37noxzReVylg8c4icjmF7d1b0xDK042pfdlalYWGJ30qNjx  
YbaZ3LD3Xjydzd8FrdGQZxuwg3rRtOBzWeA/tWu9TF0GU5XMNResZ+ft64J1  
TupgOd6S8gaVbDznoh4tyxlg65SLG9RusJ9bTef57I2wD2s1A0INWZDL6q+l  
q5hh26wtWrga2XrAfy8/QDXHmulfVi0/yIKbl/2muz9aYHo3nM/OPMqCHxMr  
qvdVrLDCia608SdZIEefJQ7WmN8arsih55lQd7ktTYXnA2WGDjs0/MiC0Tk  
dEKMRW2xL/kRtk9fZQGyxz97e8sW8+/5of7wdRb0H3+ctKZhhz0RTBS69ZZd  
/9Cvb/tC7DAzl/XFivdZ8CtX92x9sB1Weob88dLHLFi9FzXdpGSHiTajPD87  
lgVaMe2x1kW2WMfR0SWXySw4XibU8WLEBsvQuKW5PJUF0VcEW/d/ssZsBzP9  
qmeyYJtdvMLpEitsnr4rI2g+CyRg/mythCVW46hTJ7KUBa3qWrW/kTl2cGn5

fcsKG/9v1mUqTqbYwP5iay1OKnRF+Si86tXDcqSORrZlpIE4/q71LUw9+cO  
Z6n8VFC86VUi66iK3Tcbm/khSoVli+Flh3E+rJhH//pdZSrKlkxPSqipol1N  
f14fVqcCC5RStw1rIZFjLzkVtKlQTQ3qcrhmgJ5pXDZ+qUcFfaHPjxrvmqCM  
wbjgM5up4H8z6JqlhjmyZThlm5pSIbqas1d02ALNO0rdH7OgwrHfPU5u45ao  
eunLRL4NFcIKO1ff21ih8Jp7Uu72VDjBmFl+OWSJFEOpTqsOVJhhGFHj31qg  
fqnAuBtbqZC0r7xa6IY5ck1ffYG2jQqTFa816m1N0T+znpXW7VSw8ZP/Hfff  
GDVOXtE56cf2P9XUqeKyGcUXn9ilE0CFD6bDjuFX9ZH+DpfMd3upYPbsfU6R  
iy4a45G9mR1MBWke7vs25tqouOnrCO4AFYjfd93AHdFEu441Cc0epEJaSm9U  
FfveFdGk25UdpsLazcS51BY19Gww+LD/ESrUf/x18ftzVZTBMC7gjaMCl5Lq  
62ODKsjGibOt8QQV8GeKJz2KKO5pb656FNUeCXj/W1GWQIV15SrKKVSQUPK  
0FPWRhGFhSZ6v0qnwr5KA92g/xSQgrR7Kp5AhR8bIDGepYD6n2+qMidToW93  
sM6jCQXESP8+8IVKhZ7+U0YqmCjyNW/mLmRQ4UZNZrqKujL6N8k088ylQgHZ  
jmQiqooai0ND185R4fpe4+lWBzUUv8OMWVdIBXrzW9uYFHWkz8v9MLSYzT+d  
49vNRg001vTmm0QpFdQKNHmsfm4mMVsu1XqVBbhV0o0NZGuzSTXU5VUOFq  
gcet4x46SOSd5wm9GiokGMK+qABd9JSheOV9HRV22Cld2uSmh844zXQzblFh  
MyuQrC6tj2x+P1pzuMvm4+9JNY0mfTRbk6s/f58KAadqv3YbG6Cq0PA95c1s  
e8Lv4PepBihM2pIc8JgKR/9sPiV51QApdPI28LdTYWDK5H51mQHqTx/81NRB  
BUvV0cr+UwaiYV4tGttFhd3Jci/aVAyQ69dUnEoPFXj7W8vrzuujdM31RtV+  
dv1FG1vudOqhO6EZFuqDVNiudJKZjLH3YTFXvcYHKnzO/TgZdUwHab4jGmiN  
UuHCZoPypXdaKFCar0J7nj2PdayGD48myttBVdf9SoW0dj3tp8rqiLOtscglg  
lgqzcivj2bmKyIZXLN/wFxUomO2iQJ8cinPKEzNapsLrttT3yVbSqCJdim68  
RoUSN4+B3G5xNNJUwGfKQYOfj/a4i/kLI5nfcplm3DQ4sD2ET/smH/12v7hu  
zk+DkPh7kb2vuRDxmFKKpRAN2l8NGj/s+Yt7WHN50UqMBpI9jyT7ji/jfk2q

xdtI0eBCvIT/RPEizkCzfNpWjgZKDT2zy9sXcWGh2oe3KLLtBavfBKi/cUXF  
IWP2qjQQcUirOGC7husd1N+PNGmAv07XHn7Ggfila4ccdGlwstQ8KGz/BnSK  
cbPXyYQGb34Ixp3ayY/qnpt701vQoBC2bOerF0QTPHc7XGxoMOBgzqgeE0JK  
TjbObvY0WDCv7hPvEkH+6U2P3IEGr/64bQq3EEP0Jvstns400OdyfGDsgxh6  
soTd3eZ0g6Wl16rZ+8XRqpmjmbcXDR4ulwMrYeLI7NiT2u2+70/9urjkzSmB  
omtc9Hz9aeBpPp2triOBrkw+K9+xhwYc33t7fxtIoEENT9WdQTSY3ZHdpS0k  
gcRCuy76h9LAqiQgg79NHLkVb5cNOEgDTd7jc4s+4ih9sCdv92F2/o8UNN1v  
iKG7UjtF9h5h48GlaVtFLy++L6h7oujwQqnNvaXKYw0Gbt5ghJoID51/6P+  
uiAKev4ulzijBju1g65/m+VDZ3mC1kLSaHBJkyo/vZ+9jx1HToVmsPH3bXYe  
38qBuNJDFw4QadChP7WP3+A3zrbp89HwLBq0kG8n/Lb8hotbOjh1kE4DVRN3  
ubeqVbhKs8mISBY7343PTL/c+tr88WjUp0PnaFBqQ4+4ULPaLFPzPSiqkAYg  
F6eqMMKNkTRmdx4ppYGN8cOr/05LYA/3H38VW8609zh5905TGezXxV+exyrZ  
9gXcGZqtAhYmteJ4vJ4Gf8ipvf95qWNFvqnNjxposN/87xPtVk2sl/7X5mQj  
DRKLWW6FnjoY8HCZJLXQgFv6z4HdeYaY0pKgcnoPDQ51qzmF/DbH9vGujB7p  
p0F9skJ43TFLrFBm8mrgIA38bmfXa/60wiSsn+jZjtJgR+K9tsPfbTff5vT  
OuM0kLtUkj0XsgVj7L78n8xXGmS34d+EPrfH+JNSLX/9ZPO/vmb6Mc0Bc82K  
Wv68QANCq53Z8QOAZRbuftD7mwZTyW8MR9YAa6l0SW/5Q4PrrU/F5nlcsfVG  
c8f//tGg+z5v5NdNTpj9czXukg3ZYJLGaOAscsKS34k+o/NlwzXtnCQU0a3Y  
3W9/qakbs8F1wCeYlbwV+7Xy3StanBuUK1OfZbzdiPKJDonulcwGvvvdnlRd  
Z+yYfEefm2w2TGg5HpuMccZu6N/Nt1LlhucbXzwcLHXGpuzK92ipZEMt5eCD  
oqf0m062PAUpjWwICD6TSfvgjEUEZoxw6WSDzeExda3PzlhZzNErc/rZMFms  
JHt7wBkbTQ06OGqUDWW400up950xZbqnziuzbLhLH5Z5SnXGAottppqtsgHf  
9azunaszVnhDu/aGXTY40+xo+PtzKzbwUCruIsoGQ50bscnErZjUSy5zmlM2

FD4VVDu3YSu2Y3h2Mck1G/7svyyVf8QJY/4YaTzkmQ2ZlsXMJ5gj1vW3KzVg  
eza4UM3fRK4AJijyALn4sb9/6bzRUwXA3JSrOC0CsqE1evHxDk+EEY30t6nv  
y4YmTeWIG3r2WCsiUcRDssHrh/Br/X5bjMPnhCdHWDawPPQKA92tMdz+A8I/  
I7JhAOuHI0QLLOWYT89wVDZMKe43GKgwxRrP4M52xWaDek3Inbe8RthSjkHA  
g/hsqJN1rC611sPMSzdtqj7JzjcjwpLvsvYWV8/3oTA5G4LHXwRs5FXD6loW  
Syins2GuQz950FUBm+4ZO5Clz4Z44+qoh77SmN6nXs0IUjbxJ5/vCQphkXO  
PZrcSc0GU0N+blE1PqyCS67aiZENW3xSKpo2/Wv+LF4ca5rL5iOCf6j+YL5Z  
RZ1mopqfDRmLzYmx+z83B5klYhcyAZI5A/74lreXOQUefdvMdvuhD+YovsB  
N+jnnzxdmg2iGRHq+dXfcdLhTvbvy9n8C+g0ez1awPmdMPn3vDIbNiz+Kmp1  
LONYmcqtjTfYeMm8eLH1yRqu+6wQqaI+G9qUrf87df0fbmP5qltBQzYkGeGs  
6kc4kHvDV0FSYzZISCjPzldxInLbwMsTD7MhZSx34fc+LvSkv40V1pINCdum  
jW7LbkAcX27t3NGWDb4LGSw5Xm6EFktloCMbyMSrvIrsezCVJ+edUVc25FVU  
nLkpyoe4WE9H373KBv3Twt+IbgKIjR8+SXydDZax6m8iDYWQ+DXLn8Zvs6FY  
5500xrAoKjSOXRoaYveTcdlnJ3sJpNpU/pc0kg35YVfda0XY+9H5A7fpZzY/  
xLl7ViflkNErSaEPX9j9850q7nJGEEd3du02S8o2t36dLqq8yVBEaj8ib/ciG  
5cSq+Qtj6qj9ajPa8Gw2jAx+OD1yWAv1Z+qZmC+z9bJdDnJpRB8FihywHvmT  
DeuW5oObejajz4WFiPovG6h3WP7TJ0zQXC2f90deOpSbsZfbU30UZOPgTxOk  
Q+iaYXA2wxjxPEkMtBShw2qz3B1ilDUSGfwSlS1Nh4RFfbzRgS3IkKuNbK1J  
h8qBlbBAQyfUQP/D+KxDh9LmSrUve7eiLbLm+QwDOtSf03tbiXdGnoZIV8fM  
6FCcKnDswH1X1Hv3XTXTig4dWPGi7FM3tMdR/JatHR0u7Y1+kP3UHR0KyGjJ  
caTD/b+K3kbFnmhm9N4zOxc6hNhZNSsf3YYSY352f3Gng7zVfIPpZi/0d1F7  
gOVFh12CMbzqg16ImBEyvMWXDhK9TZILR7yR0MaC8YmddHAq/70+ecobnc1/  
+T13Nx2OXXLz1Nu+Hcmr8izYB9KBMdBo7XF+Oyqrtl+dDGHXGxV1YebJdqRv

mcB5NowOkP16r0b/dnTzUQ0/iqTD2FSGadnz7cjGc0z0WxQdLNLfuEZf3Y5a  
+uVlz8XSoafsZ1t06Hbkt9P2SGeDgV3fwzk/fNG3d+oWlMjdNCXnanoPeON  
AhleG+Yn0UFGXTRcZtQLDa8vm0MaHcIsj5n7qnihg1STLd/P0KGsztD5qP02  
NC152Kkgkw723yNa9lt5ohMllz0cKXRI9LB9LSnkgVZ13/p00+jQpt1ekfzQ  
DRFui+w5z6RD3Kh0VIarKxJArvud8uiw1n/GSbbKGbE6Tkf+yKcDduB7yOYx  
JyS3805s4QU6fBzL+nZzAVDp8HTC1kt00HlbML10H4d0DmumzZTSIdxRJ12r  
2xbVzQdmXiinQ1PFbk1aiBWyOn2W5lxJhxQB3Y+aMeaome9F7s8aOrgcLqxb  
XDBBznlcF4r+o0M0eYfWytxm1KVoV+pymw5vhGlk17/qo50V8RWzd+ngUzNE  
Wzioi/bc37s21UQH/iPVeuc0tVHIC8cdXzA6+K6eEbAK10QHh/Wuf2ylw7OA  
QP13qhoo+qf4n3dP6RCNt6efDIzHcZyrPv2ddBgwi0kU/aqGEiU/l3d3s/Ef  
H7unmqyGCNa3tj8ZoMPBS2VZ8zdUUZZH0dXmITp4XPsqe9tHFTEDCcv3Ruig  
2u1mVfZTBRWd8Su7McHWX9Vj1evFyujms/nF/CU6KJ0yWH6qyu7fd0OerFU6  
CJFGws/RFNDD762Xaet00ItW+DL2Wx51ij71OMPLAK/tVwVdP21C3WqpJcmC  
DJD9kXjZLHQT6jcPXzghwoBRnv/eb5yQQ607zS8dlmHAkWtenkReOTQRpTaf  
Js8AY8NbaRpXZNF06ga3YGUG/DRMC/jPSRbNM75f3K30gNqK6rc632XQ8uXX  
szu0GXCU5DZPL5JB6zcfuHjpM8A7z+3kiK8M4m67WuRqxLZXRQUpisggwYHs  
n2DGgL7O2grXPmkk+vWE8xYrBhCXJHcHX5JGUquBFyztGOz7qDg69Jg0khdy  
njFGDCg64vrZx10aqSobbtV3YsCGexKYga400jaRKtR0ZUDdRs71Bfb8M3Ra  
m1b2ZMCBulrc2zUpZOY/7rhp09u/npobPC+FbCK7CiT9GBA5p9xX/FMKoaSG  
78IBDIhnVVGu/pJCzrRi4N/HgMO1EXYZnNLIs5iYzxXCgOVDOccdZaSRb92R  
qbUDDHj1Maxx0UwaBbT40/yOYMAFC8VzNbulUVCF/bm5KAZwkX8z4onSKGxc  
89v3WAY0LpgYBdyXRoeXhNBEPDv+Je6/h5akUSz/Yt7oSQbcKKsj3Nkig47L  
D08OJTPAQSPGzZsqg5IM2+3fnGbAF5T4GvdRBqWj2txXeAbYSAv9l4+TRUTf

/InnJLa9/XBYeLksooWd3tjGZecT13HyjqQcYiVEsDAGAzgtD8UXZcuh4kJL  
u9v5DCil+jntzt/EnkdKObUXGGC2V1bXS0ceVT7kGa+4xAD9xxtlRVrIUcPo  
G0bxNQbwvjthai6hiJrmmz8XVLRWw/suvVMEbVwX7fOrWW/n7Nv4xWiEnqh  
m/iJdlcBAa/JwVJiKkj+TkWK/X0GfFCTV3frUUHRju8kFx4ygKf4+wuqpyoS  
3GfvGtrGgIXQCM+P0mrIM5urxu41A3ow3JhKmrq+MFM+DnLgL15El6Z0dpI  
LqVF+PovBpwePbrp5Lg2Osw7fz1omQHxVfc8w03XQXwqu949/8cAFs+VvQK7  
dJGrrwIqF2GcsU00sKyJPir44PV2nwQTb048E56/oo8mDqfHicswYflV//0g  
cQNEwn8qS1diQmkmH+vHJPteFpa0t1RjwqXxm78vbDdEmkXOb75rMoGVik3+  
fNMQtd2q4NtryASdN+J5/rGbkZTDu1JREyYMHZD25m7fjA6+ELR7as6E3Nui  
1UFyRqhht/3rNGsmeBmdfKZ6yAhtGI89Yr6FCdxW6m2SN42QX9xlninEhLdG  
77DIRSNUttZTUurEhI9pQQN5lsZoPovLZrcrEySJR/WuHTNGTtIWvcKeTEip  
7B2Yv2qM8q5ERLd5M0F/7rANT58x+rz5/IbUHUzYrisbLrtijMyaOopNdzEh  
pkCTHCNkggiuq5Zf9zDBqP6hTqqcCerrM3hVEsQEJwnx8rOqJkh9f/DhXaFM  
SPgxws/UNEHHvzM5hQ4yoeD4WPhW9vPjUy1FrYeYkNT3vpWuYoLEuOfNk2OY  
MIUjmW+VMUGhLI2XxseY0Pil+IkDvwmqV9wVOXGcCRGLjzjvTRkjjiryv+JE  
JvgHys6PNBkjX8vGwp0pTHgf0nSiKsMYIT7+ZiqYzoSiAxplHVuM0ay3wosW  
PjvP9q7Cme9GClA8Dp4iMch2u8mJlywjxIpM/7uZyoQ9lp1esvpGaHT+v4Jx  
OhsPHknH9HubkcmZT8YXWUzwfUiKabDZjM5slHy+4xwTmA+LJ2NqDVH3eecw  
/kImhB/q6wmQNkTKmol/sIts/vY9rtOJM0CY/bvNhlFz328YU3Xl1EdSlxJF  
eq4zoblqW5axvR6K/iv580Q1E+TNq47nxugiGWx7/YObTGClA1jaVWijl8rT  
rP13mPDkaN0jdFsLtaZT4zfcZ4JwnLCZ9W1NFOvQZrathQknjmmman2Gqo9bL  
ByR/PmHC/ZPbEuhRaki0499C3jMmCJhocgnYqKK2Fts7Q91MmL+a21sQrIAU  
nf6zjh5m47/QuP/TxQdL/OSE/nEhCMhn8zmOwVQB9fU8s1xNl+Kd4x1Qzeg



hCeaTSvfmBDo+13HIH8S16nRWnTpJxNCv781e1PV3KxK3J/quMAEYucd01Mu  
P5oTx9cCvywxoeY355uwPavNL5yL7KmrTCiu9d1/M5wLU71mrbR5nY3HcCC5  
fZgXS+R587eHMwc0Pqk92JUhiHVFHB9J4MmBJEH1dx6mwpj6U9FHcgI5cL/2  
/QPqgAiWpF17+aFQDowpd60/u0SxbrJnRqhYDvy6mYSj54tgmpOTodxSOFA0  
Kka3K00IS3EjOVbK5kCD4c/nKycFsJ4KdXUvhRwworteG+rnwbT5W7hmlXNA  
84bgzpZyTiztcPDYWfUc4D9Q9Xb500pzX8fqE2vtHOBXYFIISP5s1tUrLH+v  
lwNw6zfvfHBvczrVknRmcw6UbkhgPE0awel5xrk+s8iBku+ziyUPOVB6tbBO  
jE00CBWeGKgu5EP9gjV8ovY5MFMjJlyVQTpx7h/veXAzM+ZZZryTAJlvPjS  
EbA1Bx6Z291/LC0DBgwyq1Zdc6Cjw9Da1mwTMqSr0ko8c+DFx3JHfyFFRjhu  
jnbangMS08aOks8ro0GvwG0T03Jg31RetVq4KjKqXTag7cqB6J07XM64qCGi  
cIGQ0V62P3WwT3paDQ3Fmv/oDcoBxqEtyiq+6siku+flydAcaNt+ab4/Wh2R  
jY7WbTqYA8eUrYztc0roA3NjTv0hHLj9J1zk96QaMvtZeexADBsPq2KCUrwa  
yvJx9eU5lgNqBnt+Zg2popH/xkyqjudAqLV4o5S2KrIQw4t7J+aAVBw+w6ZG  
GdHilOdnk3PAT6plYPGNlhrtedB37nQOMKV7beV65JGV6d7bNvgc+Ly5li7g  
khyi5y6d/UDMgTBZS6dDjjLo89zZhIwsNn/02J0cLZLI2s90lyY9B/74R1zj  
3y60hOzOZMqycoC1ynMxPkoEjaq9vCl4LgeifqPWTIRtRA0CCqN/z+fANorC  
IRpVAGXNHRaZu5gDZq2LQ0HD/Cjo3V378cs5IFbmwcXYIYBMH3PHvL2aA402  
aRtfGwoi3iq/C50VOTAs/IR0wGwjGmKVPmuuyQEdNeV4mzAhVJc0s1j/Xw70  
HGe83P1QGGWG2muW384B2w3iFx+BKNrjTvM7f48dXxQ7JRUhhgxNBjNoD3Jg  
Xbdve6i40OKQ0/7v9CM23gFxFzdeE0dv/p0YjnuSA56FhcEyqhKoevLxxoPP  
cuDiD8/8DIIESn8larf7BTv/6wbLdi8lkn+94M0er3Kg8orL3K4Nkkjnck0B  
7nUORNZ4XzuvLInWyCttJm/Z9venjY/KSqKeo24LGu9z4K6nWI3bhAQqD8hX  
k/2YAx/EHMzzMiVQEhrzERxj+7s6jz2YFEde2qbpfydyoHDDvgGzjeJITeTM

jdkptn5aEnw6u0TR0mLX0NhMDsRNoS/4MSHUOSwv8Haerfc75PLD2wRQSfth  
686lHEjwa3myb5EbHa+9G9G8mgNZnx/NHy7/h3PL5z5Xv54DcoTbv69eW8Ax  
kd6nHZwsGL0oKpwGb3FJZr5J2zawgF/S+8/Qr7HmM01Toi48LGDfayh7DP5p  
9pIvuY74WMBlc61xelEPsxJpx9kIsOBXB53rSa44pso13W+6kQWLnn9LVNtl  
sY1LEkcMhFlQr9I8Q72ojC19s92gJcoC3azLqVnCGtjocGiRsjg7/llHiO6P  
NtbQXtchLs0CE5eVrI6HxIjJ/Tf7N8qywEjakTrgbIZl1a4tcW9iQWNH5iy9  
xwILyvfUWlZkQenva0EnAu0wV2r8wzllFqSfLFhLDsJhJqcLd35XZUF58dlV  
m62A8URM4Ec0WfCoS+ts/I2t2Owe4U2D2ixwV1xOu4B3wYa8LOp7dVkQyjKo  
E4t1w+osCCNthiyI//4U/yRrG1aoW3USM2JB1c578VP3vTGCY09QowkLvs8J  
IV3k9MUCuJW31FiwwMXhar5QnB8Gy8595VYs2NxfuepauRPTn46JKrFhwQtm  
R00zij8mNZrHUWjHgoymFL5fE/7Yv9f3z+fas8B6iTqnXO6PTT0bNcpGLLg6  
auF/8dJOrP8B31MisPm5DTivzh0Y9p9RcLoTC56ZGpCehfhglVd3/TrlzIJ9  
n0/0+fFtw+75X6n1cWXBREDMj5VNbthTnh+ROu4ssBwqcK8hbcXe3LVR/efB  
gkrzRdrZDMDGDxHfDWxjweVe1Ypvz7dgC3I9eXXeLEhaz/JdtbPGuDoVvMg+  
LFiyc9ofH2u0SaQe4gnZwYKRvhjVQykmmJrhbcxyJwtkNnu2Ti4aYibD66eE  
d7H5G7fIM76hJwHT0/RLAAt2b73RXiWqh/k4FEw93MOCM2piasde6mAhs5+u  
ntvHAgN9b96Tl7SxogYx6sIBFnRp+83rxChjVRFBTi/C2Xobl5n9YySPNcpU  
/imLYMHAJelVyzFprOPZQkPKIRZs8NkuNkARx94mORz1i2KB6trkvTJ/QWxC  
L1tHP4aN584ax49eXNjS0MAoZywLnF9q35q3XGrmoasXvTvKgoMLGctP/nxu  
lsId3XkzjgViWPsX28lGnMbMfSHqcRbYHtq/RXHkC87sMs/T0AQWEDfiGv7r  
m8c5+u44Y5PIztesd72qewXny3nJRiyJre9aPWedmX+4/be+zk0ms+AdTqP1  
bCEXOhpuUfMolQW07rP737zgRulSGQfPn2bBNWpkyiCLFzHaXygd08Mct5Wh  
06lf+FBxouxvVzwl1BWT81R7+NENnXCWciYLPE7NeYUdEEAPBus8logsUBaO

L5irEkCd1FWubjIL1kY195xpEkDv7FwfXsti47Vom/rwqgD6+j335Gkau3+2  
D3/dmyiAfhcPG+2is8BvZguNf6sA4t2u99WQyeb3LcE9WV4ASf9LuMLNYoG9  
yEehYGEbPfnfsu9DLrtfzp1uOWgogCwOCEk1nGXjEZvt5ZglLZK7HmZnc8C  
KLYsumoqiPyeXCWHn2dBjUZVnr3tRhSW8NNhywV2f/JJqjT/J4TitbasSFxk  
Qa5Hqe7ANRGUMUC+NVXMxmcJeSkWiKEcS19MawkLC102FQTqSqASG2WtoIJ2  
fVKaLNKsJKr9FjUSX8YCEXWXtZlxafSw6M55j3IW+H7pTKvll0MvtnHuULvO  
ni9lvbcHQuTR0JqX4EoFC2yKT27NmFJEKyHjaZU17H4wyEzZtVsN8YuZWGXU  
suBLd35tzZI6knuc+nP3f2x7ofGOH3c1kc7xZ5XGN9n9XBlide2CnrLSkAzj  
u82CBTVTo5BSXeTSH6LwsYE9X7XuCFzt0kf+pOr+u3fZ+QwsX1hX2YyOTzq6  
RTaxYPBTKlNCzRTBh4iKilcsOHTWejakygyJ9lL5lJAWjCv8KQnwska3mnqf  
hbeyYCpgk/1fzBp9YRxpP9DJxi/YiUC8iVADgVQZ2sUCiUevEo3NARFOVfGH  
drNAbc9Cv5ugI1I+MncR0seevysdU9PVTmh6l7ReSD8LHITnSdw+vhU98LSl  
Bg+wQOk+x9bz5s5ojwXeI2iIBcu4lUuGl1yQtt61qsAPLBAPuWgj6+yKfPWe  
CwSOsEDESPxh3qgrapP4EbVvlAVms4fxZvFuKI9PvHPvZxYUb1G2Np13Q6Fr  
Fvp7x1kg3lIr+HjAHRnP7aHtmWDnv5LaNoW5o/UvaVO7v7Jg00HG5D8+D9Q1  
VOq5e4oFmqnaWl1bPFDRq7bqgGn2/Hjwp2xtjweKavsqGDDD5rP0MRmFeCCb  
+0Ixu2ZZcOea4RLy9EC8dSYv/OfZ+bvNydQoeKD+Mn8D/18s+MbVJmLS647K  
zidl71xizx+/vRtSo9xRHL34u98yC+puRcjbjrkB3zLnr9Vdv9fvpQsi3ND  
IonjNTvWWPDm7B3XJydd0YdofqEd6yw4IhxW8S3bBVXvNzziy5ELk96nT+DO  
OKMkf98uH65ckNikvbEsdCty9Ugw9OHOhf2mypoTrJyQNCqkb+fNBZuCCOOX  
HI7ols6ol7dgLqiz2qilX+xRhij3rZdQLiRu3e6wb6cd8hHXFFYSyYV00Vz3  
J0vWSJnXK3abWC4M65fzBvVYounVYy89JXLhbD4IWXPUHDX9PLvZUyoXnm7f  
ckVR2wxRx+8x/lfBdcdj9X9x2STJzl7Ze5PnOEpISKgkhGjYSUuLhmioZ0sl

JKtS4SvJcwsIRKTQJISUKHv73d+fn9e9z/mc836/z/uc+8+zXpqK4zrjl/Ky  
jMH3w6c/LrJUvDgtEWpwwRA0Xy+6u8hRUfLnEW53TX0Yq1EvdlagorC8wuQd  
cV2ofeQs6qxExeuMGQdXT22g3Y2IdlKhovzWcUvFLk0Iyr78ep0aFW9tOyo0  
8mgVGLJKDddpULHC10+ZwBsNmDvfmeaoScWXkT4qw+oa0HhydmitNhXtaPpD  
1kXqcDVeeeNaXSruMbg9dCBAHfbsXXt/jT4Vp+oTf1haqYNI407lawypuGE4  
KUPERB14vS/EOBhTsUQ3ouWcozq00d9vQVMqpvMtrreJUicsu7dGaE7FSGGu  
loeZ6hBjMnnZ3pKK5bXG6qfeqwNoyv8Fayq+eOK9dLW4Bojl23uCLRV7j+m5  
Ra3TAK7mc23ydlTcK+XeUbBXA0ZPtPpMU6go0pBLIT+lAT+MV3Z22FPR8ri7  
OZumAR97greVOVAx8dxGkXy2BjQzij5R11KREijG/98lDXjmNBoQs46K7w6N  
L9PbpwFlU6u73ZypeMI1VGw/aEB+0ZkQ3fVUbHKrmZ74pw4Z/s19AhuoKDge  
X66Sog5potK7v7tR0fbxN10/eTVIehY4UONBRW+x6O3LPNqgPi4/IsuTitGx  
JxVyD6rCHo2/f457UdFr49GQlP0qsL3DOna7DxU/u6SZuZxSAo+UpBHRLVrc  
9+pKQM0jeVhj2xgv7UvFp2IN8t6JsmA5KD45uo2Khr+UE073S4jO5vYjb7ZT  
sSadl39KewWlcf85fnEHFZ8pmKr1sLjhS8Pyc9y7qSjb7TThqrfAaT3qK9S9  
h4qv9+ZZhrYIEM8Nsi9wwkk9beotTXUXI4qoplCOR1Nx+h9dIUtzJZG59qj4  
llgqfQxzMlaiKxLU8VqGWRwVj+yaOJU6r0Ic3rb56tABKkqs1nWe91IFRC7N  
lG86RMU+fWvF1cFaxA70jxuFR8h6Qg59vL5Bh/CKMVI5d5SKfBfTNIQs1yOc  
VA/nhB6n4k0/DYp6oT5h8/aZxpqTJL7Huo7ulzAk9M8K5SsnUbE9a9c7cDUi  
VKy8dOZPUZF19yD1koYxITGQcefjGZK/D4+5W84aE/zXeg0qkqnoknjrSXGd  
MTHjpv+AmULWe+5ZxmSfMfFnId50/3kqKriEjsd/NSa6H3DKPC+S/b2yJ/Tv  
A2PiXQi/IWEaFY97XVKw9DMmXkpufLz0ChWr0+00VB8YEZV17NUDVCoyWDMJ  
UV6GRPHhbK4dnYrbbNdeu3FXn8jW1cFjnk/rt3N+1yXYHzeV5PEpiltf+Zr  
dro2kZJW6bjjKoln9F7ug7qaxFHkeWl3jeQ3/fKbxCPqRPTIhvVyN6ioxHd3

evqqChGSy3g1mUnFQ3MiFT4v5AkXQc3Wkhwq6se8fPBdUpywq4z2upJLRa72  
qw1GeUsJo8hH76LyqLhV76ym4m8eQk2Ja+uGAjL+I1mlP5pjnSrywftlir2  
2Cdv2dH3iyN0irqd/y7pB6ViMm+ZtZw5s49feu9Rsa1YZzBw62fK3+9qQdX3  
qTj0jjdg2cYhSi87oifzIcm3W+VYYM045aNZuOD+Uiq6sc6cpU3PUFpb9hg6  
/0fF1BudU14qLVLqInb7yD+iYm6zy0iy8hKoEtiVMFxBxb8hLquemHFDya3Q  
rNpKKrYWbotLaeOGQvuddewqsl84EYsHuXkg61PwYARBxXMVUSOijdzAOhQk  
js+oSJR77HtvxA0XJXZYS9aQ/fd2Pnu77RI4ft8gsL+W9BPPdz403YuUha3+  
Z6pekL+/xRe84/4cjfanX9GVl1Q82xlVpjo8Rdl1eltraAMVo1R/Z6TfHaME  
KPtOWL+iYu3eR88KBoYprls3r/n2mopiMfA1enc7BUe99/zXSvrJAXp3+/YM  
jtVlr7TUNiqqzCu+spp9z9F4ufGjSQcVNW0+uq4g/nHkdnpw8b+nlrNmVjzF  
YZlJtuim+fEDyZe0WNba03Mc/msb3lo/UXHsavr/gouYt7SNe7UF1Jflz9f  
3jLDTYy1uaRv6SLx+9WaNrHAS/yKdiZ0v1HxQBft1rWKn+gWdupb6KHivtYJ  
3wptQalJz1H4bR/ZD/5tOrdshYimNWuN839Q8evGmb8x/UJE7VeHLUf7qdhc  
uNbktLYwUZmAxxb+ouKW8NNRDv+EiAfS9jnqg1Q0pKVpL7cRlvJKKPWTf0j/  
VrX97jkhQNzwsBt6NUz6xb0dBuLW/ATjl61k1j8qdkl21X+X5yXOJ9vYxo9S  
UVfzkmem0ulRDXrIjdxKvosXpr6c3Kec4iwTFaYpKLGif3BXeMTnGg/i7t/  
p0h/klY6/tRymBM6Ydb2flaKxgVrHxhc/cLxo5lOpc+ReDHCL+3kqqRsMjRR  
ilqgYtCvoYJB6Z8U10YjRwcuGlZYqApH+E9QYJdhuBQ3DWPbHmZKiiwBc26D  
KwM8NDzh+LN/JlgAdDP1yjl8NPR5c7j9vKkoyHRoc+8SouH57t3FsvnSIBqn  
pW27lIYZcbQopxY54BXV9BBdRkMxxZ0OHY2V4e869YxyMTK+HXG7SpGcl/8p  
mgrI0vDnW2/PXzIG8GyTgu+nITT0jeXntV1nBI/+yJ24L0/DY6dlSimlxpC7  
SrZxqzINg3xnp+w5ppBRLf1XT5WGBfyfVSJlZkANkJLmUqeh++zAfwU3zeEE  
UzykQJOGYwuTtzU8LcH8wIBhrjYNezsoM9pqVvDL59nsTV0aLu4bfvq62wqy

zNn11/RpSFzl13sSag2bJaOZbEMaLgnTPzV40hqExxxD6MY03HBjQMrV1Bqe  
vZU3umxKQ40180PtUSs4WDoye96chmxv3dFUf0vQpzfUJ1vScNfo6Winb+bQ  
E5fFPGVNQ8uD0vWNIWbA9joUcsKWxKvrK4V7xATcTD2MEuxo2GmY2zKYZgzc  
4qvmDgAN6XUjM5L7DaHi32z9PqThjtmqtPJePYh+08aMWkNDzvnf7JlzoQDx  
sDBkryMNw3a4D9dGasGHK4lGYU40rD1v8nHw2ipli906F+RCw3vb+EIMyP3A  
0dOwwd+Vhhd1SefbVGDGSM+lq8bDZdbSwaGWlThwflPIT4eZD3yli01syqw  
a7jEyN0ThqkjWZsbN6mAfEvq3AYvGvaJh/HvKlKG1uKgBmcfMp4f5aqPuDlk  
p1mx1m6h4eMtye5PvimBXbToTntfGp7JmRUZV1KGEffvRqv9ajj13rfav1UZ  
Cgyq5iz9adjToF+keUIFApbRG0wDafiu/HPnFR9VINdxlmeQqVeujMCMaDWo  
b8KduiEk/wfWlMa2qMOJuzLGmqE0PNIT6uqQsArMLw7Nqe4i8ZVsumoTpwW/  
ll40KO4h418/2dNSpgM3N1xnrQynoaREzY2l0vogvNTVeEU0DfdILLtVdMoY  
nv1SmReJpWFCjFxX+nMTONG42SAYR0Mn0SPtZgJm8C319k6ugzScmzA6Bmcs  
gLX3mPHclRoa2wnFMR9bgtt67/nJlzR0LrC5t/u7FXDr6DaOHqXhuoqkVm0+  
G6gQXMlePk7DppKcE27SthDd37nz90my374G+DlJrwb1+mLjn0k0vJAUz3+e  
2w7e55+d7zlnQ+WHebpb3ttB2jn/xq9nSX0JG3wfolHAcbz++M5GtY88jrb  
Ywgg4yQc2pFKw9OH1TKwEOCB5jftgs0nFmaXyK7CBDGXzHfflmG4Sa/AxIM  
7EHuR1pjw2UaBhRM6x4wsYfWF2HsF1Qa8ht/KZAVtlfk23ah1XQaFp7L2hVf  
DGB3VsKEw6QhK9pjlK0KMBL6a76CTUPF3H9faIEUyHesbiy7SkOfFsZ/8SF2  
4K+Rzn5wjYaM6TVC7rqrQZw3JvTuDRqKsPn36JXaQH3vOpOCmzTkC9xrjxn  
BSdqFRZuZZN88qyVUVeyhIFTjexrt2kouqKXh7nMFJ4r1yUfyCf19Fv42xY+  
Y8isqj6wsZCGsqshfqFND3wmKrx57tGwqrnIYt2cGhjSy9Z8KSbvb4xZLKtX  
ACHjByaPHpB8dwVGT+ySAGJv/vKIMhpy0e8P71S8TUnnv7XgWE7D4o8z9wXW  
8RD7b2X+Uaog9V/77WHxGQnCAzM+Tz2m4dBj3guaBxQJ7S/MV21PSD+rL0ob

Oa908CRQK+9ySD/7IqlZZqlFfjW+VjJ8lIZ/oyofsZk6REVpSnpQNQ0PJVxb  
eyNfl6B7njlNw0vDlbwVDc8jdYnoPycPSr6g4YcQmKvod23C5fzRsKE6sh6J  
2AM5oZqEutYhn/p6GvIY8Pmue610LNTGrc1pJPlqa6ckG6oS740iTY810TBU  
8Ll7o7AiUTq/V3XLa1J/Sd6az2/LEGkZYWLGrTQ8tcKPb8ZAnNhjFbwo1EbW  
/8XULfuTELHmnf9Q71savth6rUb6AhehuM/3C6edhiE7mz9ZdPzlTC3zaWJ3  
0tB6ycZvnytfctqKNj7Z94G8r3D3/hqRb5R7zhuKNnyioWnIN4uAvH+UID6n  
q6u+kPNA+vKKItNpSkjSmpTFrzSsvNu+bnnOIoWiBIc+dJN+x/Lb65TADbJP  
bHaV9tCwrkHafwWTF0a2Wmy+1Ef2U4zy0T2q/NA8Zuy4+wep95T4ug3KAlBA  
1Tdz6KfhailpeJImAKcMtdXkf9GwX5K3pzxGAAJeqa8Y//1//UIJ1PCD9R5I  
rpY/Jp9RL4q9kvlAnE9+uGCYrG/xtZX4FA8MZkt/PfWP5C9I16wnkRtegniz  
/yjpV0vjRMvVlkDOP2VVluOk3njd6PJPFInHDgvdEZukYVTkxYa2kHnKVim+  
jF9TNHyUffsp1W6WYlrClfp8hoYum9gHfF2mKSib5w5lzpF6Tw/+rZk8Sfn5  
e3LX4QUaCsbzqs6Pj1NqUkY3e3HRcdOPk9Kf2GOU66uGHfW56bhZrFRkzYFR  
yqGaX2b8vHTkXlyZ56seoXjt+KHWzUdHffnsrR6JlxT9uW8rKgXouLvZ+ea1  
0hGKwNUvXAwHoubd2vnuj98opcfiw3DUUjr+vJE24XhwjFLV9u6r8zl6OjyZ  
4c/mm6CwYlqbVZftUXXuAC+30BRln0hT1awYHReDdw3vTpyhuBW+vNMuTsfv  
v1+9bluYp2g61Wbcl6Rj/TFYpIZxwZJeljVVmo7xXMfjSjy44fPJysM7Zel4  
kSYwdHY/L5QrI0+myNHRZbBdX6KTH6iPH26RUaDj+8augaBjQqCbcXZQVomO  
iS5PQbZABJ4nbDslp0JHFYcP0laSYhC43UBWQY2OJ4b2b8zkEoep1UuKFTXo  
mNnlxDGUlwSaQvtaZU06ljv9WkPkwb9+YIPKtp0nNo2IniyRxaCCE8+DX06  
8rsyMy4fUYKZTI1rqwzpqPxyyKj/lQowTk4ZaxnTsTE3XqjvE0kfQU112qZk  
/M6fbx86aEA9ZvnrmtNx9bS3kluuJoSoxo/oWdLR7tZz9Rum2jC3xCXfWjQO  
GLPuRv52XTCqHS41tqPj6bbbzHIJl6i/VbveFOgY6eHB69NmDCFn2F1mSJ7r

aqvEDUyBtc5+qZUjHcv99K9UyVqAsaZEtrUTHXsE7V7PFVpCI/9PS1sXOvaF  
FPrze1jDwsu0EIobid/mxZKZltWQXhAyBR50TBZZqVxQTAHTVMS09KRjQtGI  
em62Pexy/fp4rQ8dP/1Wz+LvdYDmJoMVrv501H4luSM31Ql23VuSvyGQjiIS  
R8bPtTgDV1q7nXsQHQvO31SRVV0P5huP7/EMJfPRCP3A1b8BXhttWti0i44B  
HXKPKwPcYY/YKob3HjoWvvnv+prfLA7j/TelsDqfjNTOOrXVusPOH6m6anWyLp  
uGW8ouIR9yawLMna7BtNx688B0ubb22CVlr8722xdNRtmXalnN4E4ftdkrbH  
0XGG0lVGGd4EvD4KMgHxdFhxVe0/GLsJMs3/3g08SEejbNvzauGeYC31fE3Q  
YTqmSKhGrf3uDm3j7PfBCXT0uPL0aHaVK0R0RETVPEbH9BUmnb0pzsD7yJ43  
7AQdcy7xfkk84AiZbImMXYl0/DVT/2vongNYH/5ptOcUic+/x6lLyPnX5vvk  
xd4zdDzosrpB6oYtRNpc3h6RTMdD+9JFq1WsgF9u57/IFDoeiXQxfrTRHLJm  
LM9Fnyf7w6aG9y6agu0nYcXYi6Q+PxlL8RY2gXdPvpbsS6PjD7Nz6rbHjCH6  
eonL/it0zMg66jerbwyCx50/xtPoOFHmtO3olBHkBPjFH2TQcbR7basiwwjs  
wFD4MluOS3styqcHDAFDiTvrSDodny3X6qp5awCxi+0WRzPomPZ9g0z0ZX0Q  
6i58dew6HcE/zKrDRA/yisz4DmSS+n1voSBcowNrDnAgKouOZgfiTvbZaEOX  
vfPhsBwS/5a3dfevasIx4TcPA3LpeP6STFK7wCpY2e73e3MeHe+LHpd2vKkO  
5Tf7NDwK6BjszXtudocaeIdHBzoV0ZGx/V7b7HpV+Gs+xYa7pN9oHZ52DFCB  
S4tJbyyL6Th2c+7bhJ4y6DYuXWr0gl6pxf2UMy2K8JLbDNQqIeuRv9e7+ZYC  
h05QPqFcRurp5/q3EfnysES38JFMOR0VxZ+K1H2Sg8wx03/LK0g9Ps3z2lty  
sPppla5gJR0VfgS/1Xi3Et6nOoVyVdHxpsNG5xTqSjjg03pjikNH1uvia8Fx  
K0Fc2a/z71M6Pkh9Vn0idiXcH+gVG6im49WY50X3zq4Et7Io12+1dOQ+PuNc  
dWclDjyYPP3hBfm80Of84c8rIXI9EufNS5KPJfM7H6yQAzXJpZMNDXQcjl3/  
wmSdHDz9yjCueUXqe/blzcZYOfAvVAqvbCb9/npFn0uaHEztL7hV0kLqe9P2  
swlsOWCC6ZeiN3TUIP4bZ5AsB6ZCVdK33tLRor8808hHDLrerv081k76ee3w



tMfsSojMbEml5J+d/vjgW0HV0LQ3m21Fz7QUfDCIx7FKlnIM+ud0/2Jjk5v  
jS5kd8jA2oVIy2Nf6Og5Ni9g2iIN3fUTMfFddBRVvF2XmCMFx+mJhZHf6Mib  
8uVgrrskyAUK94b2kvqNsaqPaRaHR9oMhYDvpD+KuofXKa0An1HFLZt/knzD  
vpWyx0XhHyf/svsAHcMryF3GWxjSukwa1v0m+2FxTPXHYz7Q837CDX/IeKnC  
uY+KuKBecZ2d5TAdQ1mrnYXsJyhh/a8PGP6jo+z3i4ubXPoo3KW+9zVH6ZgV  
u/SkNKWec/N4T7/SOB2jVb33vvL8x7FziVSTmSTn41dxgW/BXMSBLyeZArN0  
PHtSPMuqQ4wQLxBqWZwj/bPnynAVS4oojqMLTi2Q961JfdsWL0f0C+Qf7edm  
oOxli9D3tmqEv+nr4AZhBj7aopXoztYnpue2XqsWYaDDBN/HMSsjgvXy27vH  
ogy07faooQ8aE63+485F4gzco7C9Z9MFM8LxnILhBTkGPrH9HChVYE3wL3+V  
GqzAwAuZNqL3XtsQ9awj362UGOgh8rI0etiWOK+k7SCqwsAry4bkHvHYEW55  
Hdf7VBnY7lbU6yxIIUQNz05VqjNwPAZ6bsxSiNb/zHyoqxj4XOHPL4vPQNAo  
Pfd3azFQcXrqzcUCe8L7xZWloMPA1Zvb/rtshISku/1uST0GpkWsdLI4iUTH  
uz81v/QZyBYfPX2gBol0/+tK1YYMXHEj8UPaFBJ+fa4JbGMGDgT0Pniq4kAo  
RE63R5kyULDALt7J1oH4Oppv4mjOQL/X9y4FOzoQWUe3XJKzZGCTuu/ujeBA  
hPDwDfy1YqDzrH+Eh5YDoXGh1PGIDYln/heeGwtI/BAPybqxmox3bDbjSC0S  
BRlic/spDNR41ZmhdgCjclWnW13tGTj1kx7VIY6EflFUqYoDAzfrq73wM7An  
hkwUlk+uYWDkwokjRwYpxIPHjeHNjiQ/4+KZJ0PsiH0OR+puOTHw+4qvplGX  
bQnTBi21BBcGMr27rdbstybGPDuOe7oycKhi5b2FZZZE+fszHzTdGCh8epNH  
Jsnf4SAzi3l3BprOfh/KMzAhbPu/XXm7kYFBS0ziYwYMiLmYK40Fm8j3tdp2  
ZFFrEMQkuCR6MzBw9/2s3t5VROLJP7e2bCbqxam3tPRUI9YIXF/U38pAY6Nn  
pguySgTvZdftPNsYyDpeX3obZIk66enyD34MTNejRoWtkCBSMvPFH/gzMDzO  
/FmC2jLCVXNLdHIgAzvdXkpvP8ZHiBTzNvoHMRD1+Q9eCVrgvLYoXWUWwsBc  
eN+gzz3GucwJThIKZaD5WS/B2q8/OJ7rxL50hZF460693hjexhFvjzLdzMw

MYIm+dY2m/LOJ4pxcS8DtQd+uPQatFJYn+X/hkQw0MV5pOC/rk6Kb2jjBpso  
BhbwZTVb7f9AkRs8nL88hoG+NV0D35TaKZ/3a/H8iCXjWVoWqpnWUTJn2wOr  
4sh6nZY06958yAk6faaSFk/y++PFHmeDDxy1pWbSew8yEE6d4TmeOMDpo33b  
Z3+YgXfW0o8oRox8uSuNEslkOdtZxM2wzxnTw7oDB5lIJGmUN5/jlfQ1f1z  
puY4A6XDi2wDEgSJezaudjFJDDxSQwhvW72CiK6eYq87zcDYy3Iv9+ZJEMbr  
80flzzJQXC+YcmlCihhp3bxxJJmBV3WNyumqskSZL++d+hRSHxqqCe6KcsTB  
7hL+m+cZSL//9s35LnnCek9wyIGLDFQL6eVTCFQkZoaXExvSGNjWNhj4jk2J  
qDpErFS7wkCT9Iurju5WJjhr1ymo0Bjorro+RKpXmSBEm5SUGAxUqhX3s/iq  
TNh/9FJVYJF8HX3gNL9ZmXh2+406XDoDF+LD1P1ilAiHfUGashkMFN0he/2d  
niJRY/dTW/o62e/rLyy7eE6ecBSM1pPMZODY2sR3N0+sJF68HTMQzyL1s+Ox  
u9EyGcLp5lFjsRwGlt2Zat9mJEnUh3ObieYy8IAIVyN8EyPWW6ZaiOSR+tDU  
WDZLESYal4hZCxeQ+GR1t4Y3LCE2NLNsBYsYWD+230Sm8i+nKV2Rwn+X9Ket  
AaLKh1op7qG59rzFZD1Bvo3reWcpr4301nA/YKDn/KLAlwkh2Dj70JGrhIGh  
QlHjiiES0Fpn7bxQsvrrComr7NaV0Bbg5DbziElzCF1XRd18NZp9ph6zMC5  
nRYut3dqwrsx700TTxhYbcud/XiPDnReCN4y8pSBYpfY14OljMB3a7/v32oG  
Su1qPP+z0xg+qsVsH6pl4L6WZ4+ei5jC9qHxgMEXJL6mVY0Lq8zg8+NjQb9e  
kvlXr7dxUzGHgLM80/sbGLit2yt/eNIcvnqeD/vxioE9QQ+8Rk9ZwA6FFXv6  
mhmorvCxMi3fArp/ssN7WhioIN7aVR1mAcGlSIHdbxj4ag2t+iLHHHp03I75  
+pbkv1glaLjYDHa66sd9bmdg3YWnkj6+ptAnVRr/sZP0Q867XBly/wv7ZnPo  
/QcG7jjV2MJHNYIfd58d6fjEwGnDnid6Wgaw57DzsXdfSH50/l2W3aELA2tf  
n2jrIuvvs1+eka0N4cs3J7V+I/XdWZLrmKsJgx8/nX7dy8Cn3w6CxU8NiMoL  
SW76zvj//1N/jghXh6F9AymNP0k87Ed09BuoQQwl9kL9AANDaIW7r7piQ+5ng  
5KW63wyUj+s6tWuPCux7d/zK8z8MPGYld3U2WRIGbvLSa4YZ+Hmg3enIBSXY

H3GB+ewf6bcbBlPHehVhzFI8nRhlyOadrV/kWYpWgPtqRtU4iaefeNWNfEWY  
aFa+UTnJwPkC6WxtJfLj/2rezYppBnZ9DxSIWFSCqVCDnPJZcl4+GCIL1VaB  
BOOy3LJ5BvpbtqnuEVGF2Vnb/JJF0s91XwloG6rBsZfVhQ+WMLGk3C8364o6  
LNBc7hbzMDGLE8G80HIVnAxsKb7Lx8QlFqaTsupawKW75WGRABOv7CvmbwAd  
SBr/XFogxMTHDQPek+F6wF29szxvKRPfJpiXT+cYAK/vvic5y5kY0mtX/W+F  
CRR1K3SfWMHEEw4xMY+UTMFzbz3vdgkmGqjKt3TNoPrCcoeEjJM3CUfrJGu  
bwFreF7FDcsykat/buMLNUvov3CQ/UqOiW6P3qnTRK3A/EZz92klJirWCUQm  
PLWGj6u08AWpMPH+Y9ey5kQbSCzW0LVTY+KUj6yvmLEtaFq1eshqMPFpi9bt  
/gZbaHp6dP/YKiaKThxSa9+wGuJctNJbtZg48UteuqR0Nci+aau6q8PEy280  
67YvrgZi24lvKXpMHGy6c7hY3w7CenT4wwyYqMxF7E+2sQORiHZdByMmyqXF  
zj9Vt4OS0cSNiiZMlM7o2G41sBp8j+nHT5syUdOZp73+3GpY4H2f3m70xB0V  
Qvc9520h99JpzKnlJnalzRvdcbyFV2mjnkVWTMzc//dGWagN/M38yB9uy8Rm  
nklY72UNLK1kPSc7Jh7sU9+2jsTD7oGJpxowsd8kxa013QJ6rL/EL9gzsZjc  
Qnbwm4OhqzlRvpaJNxS8m1SyjKEussdTawOT/F6LvfB3ShUixy8d4HFnYtnt  
ervD1fIgfSImo8uDiWC8rHImTAICL1/pZXuR8bXOGdIceii8snaC8T5MbL11  
PD2pdJpTlPVT33MLEyWuqu4wDBMlPHXom/R9mfhhyZPRzdyyxORDOCjoRz4X  
ofY1eagQmba/Mvq2M9G58Ff6zhx1wrGW+fRZABPXiYZZSDetIn5tcOi7voOJ  
WhSuyr5XmsSVd4OCR4LJfC2qNFuyNqnLgHSDzTuZmDaVfrTdfRXx+ftaL5Mw  
JlbdiV7xSUydOBU9fHDZbiY2dnP/tqHSIbQnM64N7GGittrFqzefKhCvTzo9  
exHORMsjsVGBjmwleMGRvuxIj6vK9mUpCxByFFvCJ2IZmKpVN7FwFgR4tnK  
9YZ+sUyMUCiWDF/kJnbljHlZxjEx/tP7s8kwzhHRyzokHk/2x7Lc74zzHzkl  
pRuuDx1goiyleRi8yflvN/ms8RATEXTs/N5r/aUsPM/5nneEzJ/P20TTb4qS  
6+4hfPooE+0U9MWfeS5SXDumDXccj/W68+49cQ43/A287b36JBOP84/tP7iN

D1g/PQ/LJFF6OhLf0BEhAHaxc9dHT5Hx4D/5kz2C0DOVX91yholJHyjvK+8I  
QWqS9487yWR/NzEj2/8TAtOxsuITKaQ+jN9Hq40Lwudd0oc2nSfx82thimwX  
gLmFDtRlXGSimf2b3d87eMHQ7YPA5CUm6u46orZv+xLoJGxbGy4zkRFWgdb4  
boaSaHI9/TqViW1Trx0MKkYobdl7dNYwmSiW3a+bUVdLOZr67J8km4l7kgpX  
1vm0czTmVct/pjNxJL95hrVngPM6+vSpygwmJtdbX1VKGOUc+tbneuk6ExvK  
Et96HJvmpPg4SQRlkv0n17Uq8coCp7Eu/5NpFhNTKTOek5LiP02Qrl8OUwU  
KVII/pfDTSjcDY98f4uJu/fWfizYz008UGoyv30biUG/On4dfMVDRFMN5o/n  
M1EwYd2609k8hAzv5ReehUw8HDZ/g/mHm3h2808l9TtMfDE9WHA2bwmxd2DT  
lom7pF8l8pmzzi1yxP1LlRqKmZib4+sacWSGU/Va8ue1B0xkb3s4p7NijBPm  
cPB+dAkT1a53hvUm9HNEyzoPOZSR+Vdo5IvufsmP0LRByXLS374qdaS/7KII  
i8y1Pn7MxL7j8Vut+hYppScCrl58QvajhJ1NFy8/+P8jgndwSL6WbR1MWSoc  
xR1JI7zVTKRt7bSYfCMBW9f3VnbWMLHWdin/vWRp4KpyPF30nNRbiyWHb9lK  
KDTM23C8jolxX0I9//jjg1e2gKRnPRN36meVbdylCLMSez+rNTJR6MzoV9IV  
ypCb3Jg7/ooJM135aa00KuAxrRdV38zE/bsVmywfcBkxCWLay3kfChVt88Z  
UYGsr0PzUW+YOFZT+VN8TAVcN3nW4VvSn9k9L1KeqMBo7cM0iXYmPjG69oFn  
vQpct5TY+qODid+TPMzvH1CGdYXxyo/fMzGnWG5vXLASDML3/LzWkYnb5YK9  
vDcrAi65etjkKxOJYv810ZvlyWD/DPJ2M1Flj+rW2mA5oP3Ylt5jYkPI3dE  
LiathNXbOG8Ke5noSl0lsYyQhb5XShnHvjPxd/v+DYNSsnAJEkM2/mQi3dZV  
6kaqDFg+/KarNsBEffoQq7xSBrrV1460/SL96Mz+aMpzaUhl5T550cjEvGyL  
5NtnpcFUiP9MxhDpT2u1TT/4S8Pno7vdov4y8V+s0Rs3N2k401QviSNMpJgZ  
1cRvkQbDYN0v4mOkHmhLQ18cl4b0txdufx9nYh0zQKqUjj/o9CeqYpLUp9Mv  
ixIDGdB57GF5YZrU590ydasnMtCm92AhYJbM//VvSnmMLNj2DET5zpPzIGjL  
74SQIXArXf2L1yIT7yRzaWulyoHlXgA39yUshmvHfflhzzE87GfOPOwcNfQ

MpdnJxTh85NW3TV8LFQLHtla8VYGxzhDDsBFj4I5a1vLFOBu9qOQlZCLOzo  
cj+565sqSHUdP2yylIWzQyOHA0zU4QTz0U+9ZSzsJKvCPA34seHfFs3l5Hmy  
ySjHQRPKK0It5CVY2BTVpcXTpgNKMZm5Ulls1B4e7+ip0oNzq95LiMmw8LqS  
98tUwgB8aRtGeOVZmMkz45XJbQLPXM4GLyqwcCEXS7ZfwxR0FonWaSUWGrNH  
5RW9zGAmwvT+kBoLg5oLDrc2WcC1dSsj3+uy0NnwSvsKXA28c16f2vRZ+Mvm  
89vwcjuLLno2mzIwtCgn+sJSwA7ZS6dGIMWflVRU4wuQvg69eP7HVsWWvN8  
CF7fvRac7qtszrNj4eObyfpRBY5wP8zveRaQeNjct1+IXAeJbc05zDUslFxO  
09TY7wT9KQLiVxxZKH/Tv6l80xk87R2SzjuxUKmj5kichwuo3i3bcdKVrL/3  
VHll+no4HzL0+ogbCwVF/7hPmbjCiKw2xHuwcGuqRObuGlfwawm+F+3Jwncn  
F8yD12+AmrPXFpz6sXBYvjyLUrcBdO3aL+z0YaFcypqYzdZuQB8RnQ3YwsKJ  
oTuGS266wVyBS7ivLwvLE2Yir067QeiOUx+8/Fj414M+qezsDk1SVS7u/iy8  
cEjmXcdZd7BoGn/kHMjC02fbgrvK3CHzljHWmiAWFpRv/BPx1h34bfay7EJY  
+NtFrra42x2ih3P4rEJZuCWBY/Txkzt03v4cb7KL5Dvl+UmV5+6A/tj9entY  
iCWVi6Xp7lAg7umtGc7CRn09uTpfdxBrSK1RiWThJo/s6gs87nDkZK2JfDQL  
L9oVXDdPd4Mei/ksqVgWMiivPoxKuYHroKWYWBwLSy8zX8we3QAlObEnheNZ  
mBVLu3uiwRXkthUN8R5koZeS+6fi+fVwanlfwOihFhIdnpmEzHr4/UKxefol  
Czd2aq/plnaBwzbHAtuOkvjaKo8aiToD/72Pw0XHWbj5k05SyeA6oKvYJJ0+  
yULziZ9zo/WOoMJgi/snkXjPHTr+k7MWigUmbpmfZmF2Z9pnw8Y1sPqoj8Wy  
syxc0+1Wu33QAeqHSuq+J7PwR0Tbx0U1B9gSssKXSCHzbbVvuhuj0NseM8A6  
z0LPV+Fj/ZftIXb964SYiywU5c6vadkFsFCIL+KSRurtX3yx6XYKXDC+cEPI  
CgvvukixzcPtQDZ3wHCayslvJfWvp66shjwZl2dv6OR9n1vyc5pswexC3qYi  
JgsT4yPiN8vZwrMF3t5TbBaqah50Nj9kAx5x0+03X2Whb2aIyc5ua/j0vZrP  
/BoLH563r+P1toaJphPa3zNZuDxucdJgvRWcxi+POVksVH+502auzhLEylZv

YOWwkLpWtbhxjSXoXZuKcs5j4ZOwooRxbQuoEN26qFzAwvNhkwfTL5mD06n/  
rkwVsrDHPmu4vs8M3o5LqL25w8LAnO+WRXpmELQ3rrTwHvm+jeDNHTtMYehz  
q+Op+yxseOiSIHLcBI56GnX4PWTThSMVPuXdJxsCyGpxa+h8LdfIKVik16oPG  
HdfzfeUsDL7E89upXhceKhXKcypY6PMs+9b5T9rQxLcLoqtYeMIuY8JkzSrY  
duR5ixPx//v/SM4z1eHHoFqw8jOy/88fNCxZVIUI77pOt9aSfqdvWe6lpwRp  
ziBV+IKFNcU7+m6fkQeFJ9fzkl6y8F/2e9mlpf+fr7NWfg0s7NPI6BR6Jg2W  
OdsaTF+x8OemG7kDOZLwXKrCb2kzC4vWfuKJKxOHTanSg72vWTgq435EeFwM  
vs7FH69qZeF/bZ0rLBpFITL2rSizjYUVt4OjJIRFYLRXJCvqHQs39Oos01kk  
BMLbr5g4dZD6rFabdrorAJKvhmqU3rNw2UGwsRXjh2xw95n8QOZnG9Ou1Unu  
byV3vrd8YqGTU3771yW8ULVK+FDBFxaub3nvYEjlgfVX9wgmdbHwzbIJ1e9n  
eaBD5OXVbd/leqz/HW/r5oHQxFV6pr3k/EipCniRwwv/Rk9XCX8nn5u6Nlxs  
4oMTu3vce3+wsCTr5Fx7gACIfMKuJ/2kf2DjqwxyH73qcTOW8YuFUhIGaukr  
hEGzZn5J1CCJx/7h7C3/hKHMwp++boiFkZypwcCUpeBQWKmh9JfUr6vLbZsv  
S6HipsBdgxEWzrVNxLwaXwrGLB8zyhgLl2hkFFpXgr5F7Mr3Sbl/n47X+AZ  
uRSUTg85+E+xcP/BPxf3fRYG5pHVDREzLOS/Ze6YoSkMlrEpnkfnWHhzKDP1  
m7cQnN7V3nl+gYXNQ5MygVGCMMOvtiODi43aNkuLNI8JwD7vmB+F3Gx02pk7  
symVH/rXV0U95mVjffl5xM3+GAHCo3X87NR7h6rRq+WFzostxx7L8jGucnk  
+wLcvOBuclunX5iNo4f1nLJ38sBz9b/nJ0XYyHqx0WH5P25YLUcRF1jOxiP7  
n27fU8oNjWLnR0qvYK0JrJNnLXnWEehU0ZRgo/f6+x8sZ7kha169wEKKjQeu  
15V8oPGAzFis0ToZNurlb2XVnOaFtF+ccp+VbBReNLAX7OQDvm/CECrPRldt  
rdYGhgAc69z6Yr8iG8PP+j01jxCCiOf/3tJU2fh+9M/HPZUi0FMJ23PU2dgY  
xdisayEKfg8v9DxcxUZf/nm3LfTl8Cb//d5qLTbKH14VPxYuBi6Zq/616rDx  
6QNPreEFMXjKiDvcrcfGrS+p3iuTV4DlhaeLwwZsJAeGyD8ucbiXJHJu0YiN

HZPXwsZixEHj8DbR5aZsPOiUEpf9VhyuRecxlcZzeOxxq9NBfQkQDxtVMLRk  
o6OPwMTfBaI3Y65FGs26rtw6JefSgCX1yU9d1s2pnmdMWudkYBDLh9L/O3Y  
2LBsqN/YQBKGQMs2EthoLXnxpdFWSdhlEV99FEk+uf72uB6RhC961S4X1rDR  
OPKOBxdDEnzURFszHNm4c2Sj0ut8SWiS3b61yImNawxiwkz/k4S1ywu+PnZh  
o8KjDKs7VZJQyTce1uDKxi26oQXlhCSYzDn8ee/Gxg2qAa/ankhCwUhafL8H  
G7dZypQdL5ME5YFPs5OebKwZmps2uSsJrC7t0wLebBwvdoiaI8/LOg4Iy2xm  
o3hC38of5ZJwpqmGqrmVjWcm9VzlGiRhtmb5SsttbCx/HejyvEcS4h77Z63b  
Tr6fXxu4nEcKBu4Xam0OYCO3dnanpo4UBOVNFIfuYOPfKcq8hY8UdF5faxkf  
TNZf3b1yz2kp8KBf4ZzeycZY7dZD/f9JwYvUL470MJKfdq/gnl9SYJeo25Sz  
m43fY++rjKlKg27U84/VEWzMWbbC1e+KNGTvxXBHyJoqNGoG3XH7XSYOsX+BA  
dwwbp2x0nV7PSsMVzzuxf/ex8abL4EVDQxkQcJ6aXNzPRi8T491WATLwPyAi  
uY0=

"}],

{RGBColor[0.880722, 0.611041, 0.142051], AbsoluteThickness[1.6], Opacity[1.],  
LineBox[CompressedData["

1:e]wVIHk01AsUx1UkKSJiypadCVGRrfnKPNV78Ww/Ua]kqbHOaOZnKRSaIkvE  
5FWIopCtxRtSeeqpKJWQMqmkJNmzVXrz/rjnnu+55577/dxz7l3tE+rsN19E  
RCRVGP9nq/HOUaa0CO3u/cyIYJofrSetr3KQI6BNnYnkUFM2I/aBcngZ5yut  
kW31z5NSJ3B9P9iNKk7SKvSvVq/4zQOtH8xdT3J+0ko1z8p2yO5BcnVT5XLG  
fHwbmG2IMdqHChbL7J3iQtjJXNzFEPFHm4ny7flmCYgrKqbVn9yPqbEm+iHO  
Uvjcuqky9oqBFA9+38WMZZjsXd3+YSQIeXypK5IMWbyfc+n+0BaCKopvEMtG  
DhsrjVP20MPQGMk36lJcgamSOO0BCSbau6TGaSMKGBli+8W9xcQnc9+bRU0U  
VPiXmC/wYmEmhx+5NG8V1Nz1LWahWZCclbI+yFGGeHnc6/fh4VDA6Svy214V

Fr6GLjJfwqEg6H6Xn6GG9FfP8/huB6GWwrV1jVmNtgdGtNGag9CzNrkkzlCH  
5Nk9Y9el2TD52r2wjtCATMvvAZ+92LA8z90fYqOJCcPmBs8iNuj2Jo9WG2hh  
nRbZ/OgjG/Y/u6ntitoYV71sL1Djw00qN+W4qA5m672DDAgOvHebDFuO6KAk  
tKnULoGD/UsFjsOvdbEg4/PK4nIOmPXc6oImPSi4eMbefcFBVLCJnNs1fXQ/  
roqdneQgXlnAlsijIr869Vq1PlmTj7mdt5LWoFqp8oK1MYmswybmYRwDtDm1  
/96/jUSugeAvDR9DdG/rpE57kygSch902BuhXpAqUxZO4qUdxei+0loMXty+  
1jqRRHfuUE9uxlo0roxS7TIN4u1kY3rElmP4uQ9y7xaQ6HPISXGOMYZMu1u/  
ZAWJgaKQMeqEMWStalM/8UkMzdkWijFMUGgmr81pJDHmRnHt6TFBPT+O1tlM  
Yqp8SJRPrMN9qYo/dNpI/Fh470ZG8zps9X25JK6LhIh3jn+QzXqoV13/Nv2G  
hGhNiIldzXp0RazULO4lISFNf6BqsAG+gqt15z+RkAqgRM4UbMDtGxo6QwMk  
ZO8M6bUpmmLbGi+5y19JrFC496os1RS614fquoZjrArNST4maoaLR5KWpo+S  
UGsKsdoTZQa2YsHVjjESmqr0r+YjZqjdRjf4e5yELknJXe6/EbZqSrqbjkgY  
tA45fH29EdOrnGyZQm2ic+/Xv07mmLegw91DqE1jcyrm8wR4xGc/FPYb9EZ  
sjfK2gLK+al2vkJNM6LLul6zge5xuXemcB6dS2k00LNE6xqWxv9+tvYMhYvn  
WaK6zMXNe4TEdrN7mu/krOBj089BTOjfKS2nvTbJcmsejswkCvl20uhmIRxr  
lFn9aacl5Dfk6ucaT1pD1TCwT62fxPzWZWlf2Jvg9fi8/68+EqVegufRbBoa  
z0Q+CntHYm6TZQ29Fii6wasK6CTR71P00J4F/hU4Rd95QeL5sdUqiyxsMNAY  
bCj5nETxE/HEZr4Nx7pb4tvleHo9cLZmb8Zu4d7o2UbSEycW5gUXGOH4nLT  
wMF0EpYrA6cLrzmgeKRTfNBQuj/c1J/pT9wwul7zPjmag2N1aR1vlL3gpaLg  
O/qUjYGBPxd9ENSHQhf1PGU2Zm2eDynx/dFRZG5xIPogkhS6EwvrGih4c3pa  
41k4NozzjzNLQ6Dr6Dm80ygcftODDRQmcgzMv+heJ6FsDfT/Uy9cExM9XMC  
F7AQ2q61hC7GxpTzndngCCYotVr18Ts5+O6aUGk9EYaHx3nZHc8iEBllrWd5  
lAyLAyqC5Eui8HkuSEe+MxTJopKrvl85hGTOZUK+NQQRlznGJuTHIEOGIWr5



lhgON/REz1jEwSNrS3jUaBAqplrWN2w8Au2hB+VaC4KQ1PKE/K51FMulS96c  
pwZC7MiYtoROPEYTam33bmNA3Eyyar9GArx7bhkEsQ4gPvaofZdUInYlJrnK  
V+5HXvEqN2WpY7B7UZY+2BuADT7Lmawfx6C/oXrGlhoAZxWRAMpHLmxZq+Mv  
RftDulbqYWbvcSw87eAp0ugHu/5oa9WnJyBhrN8qoeQH5cnFKjFPkzA5b0qr  
NsgX0WJpXYtyYg00L9X+999cClmFo/cPll8yx9ip4T/v1mX8y7xRgq2+10l  
XU754LZVl8GawlRoNQxsMp3vAzNnY0LzZBr0zJ68okTtxeVCYoKkpyPupe/P  
sYE9YH2y2eJfm4620Z95iQf2YMkqmuMmi104GCY6qd3ojV5e4PvcqlNQv3TE  
dONjL8Rkyfpc1s7A7NjhC669u/H56Cpe2UsZYMynT5BfPXGKX+WmoJSJou2F  
79WlPSHx9krzoX0ZoOmmptRp7RLel5Jh8srTu01kvWNyy07cIm9T1NNPlyfh  
5u2IWA+lujPrCqSzQAndtaGtzB0nJrh8LD2WBQNjwV6HoR14Tq2c2/09C3+U  
BPGUzHfgy33lxzOR2WBkTHWfjnKDzZVaTZWRbHsk3n1k/4TA33niZQZj2ehz  
DfRybyawNtt1nfVENmTNetz3PSCgEj9k4zmdjZag/iNR/xCY9VT3/kuEh3P7  
vxRcvUmgellSzgoZHrqmJeR08ghoRnhISZvwsEZHsk/jMDZkKlslfU8fBpP  
KzgcTEDWb1zj0JSHBTUrPLIYBEScU6j2FjwoT0t+u+9LQEBt2Jq8WVjflvaJ  
6kEgu0c3XtyFBxPVhqLFmwks7WAvViB4WBTqtFmXRiCh5Z9T2jt4oC+W22xn  
RYDF98z/bRcPM3YzwfGmBBwy0+v9/Fwor2RPZ9K4P4JAT3Tj4dHh/yNNXQJ  
WMXptxQE8HC05rEjXYuAfvC9Vw2BPOyUvFbLVSVwYZ+Mz7NgHmJvyouVKBFQ  
3On1+W0oD+qUhddaKATSHUvDRpg82B7i3BteQUB8y/TUr3Ahr66H+XI5Av8B  
0m4Fdw==

"}}}

{RGBColor[0.560181, 0.691569, 0.194885], AbsoluteThickness[1.6], Opacity[1.],  
LineBox[CompressedData["

1:eJwVyHk41AkAxvGpnDkm2sw4y5GKWKvDken3KpX2WW3PYFrS2lU6sM4aNteY  
wWCM+bnmV2xDhCbaTu000k07m2SL5NqoxFC29bhWUmrtH+/zfT6veVAEO3gp

jUYLXNz/dZvumYyi0wgaTeL/Xj7Eei5RXn3DHSAuDfpoRmaVEMktpjE13H8I  
nWU6jucyGgnhkeHdk8xZIsHdc/ZpWTvxaNjFJ5u7QHz0P+lcJ08nRNfvXV0Z  
shRhY5vI8FtK4kp0tNMgUw3fXVxoe+Y7TnQ6mjb+fE8TA2M3D7pqzhBvp+55  
JHB1wNny5cmbJ94RYj+F8kLeClTs8mwuID4RJQpduVaIPjScXmQ9ubMUd39U  
fN7HNEDBjMuSEJEmuvp0p4kJBkL1+Clb7HUw6nLkVuU9Q4zkh93ccXoFtOZ1  
WSe5phhTCHY7RHwGE/8jtKdeq8GbmVZTTTIAY6B/sDRvDSrX9HCvnWFiA8ux  
Qj3EApf0l0N/zGB10K/bRfTGsz0Xh+rDxYoTHR0ieTaYf5fLVmAYCNkdgNF  
lkH2sLGeikutt0PlgPBDt9fn6CzN4N2dsUe/bPy5LM8BKkr+bY1aB4x/3Fmu  
GuIIZ5p64AX7TdC/M76hk7kVETvVHp+3dYY/4eEUzmVB7UNsEYPhjm1GoXPl  
N/ahpHldfZKLN7bKchbIhxx47qj6RB8KQHq9pPuZ6beYLZp806R5GGNjX2sM  
qx5G4FeMG3ufHcO8++NxE8VReDXM2ca4hSGL0Z9WXh8CzqEn1x1ORGLLtCij  
qjoctSHbS0al0QjWzhxrso2CRnVbGENyEpHP5l5FbYgBZ21t+tNSLiK61mp7  
qj6C8zONnoXkOCQ8clMqerjYZrG14/Ke07ifQUm7O+KgtPBjHbROwPjvJ8JW  
XTqNNbfdPG16EyFS0Tj+L0/Ao9vL4jeVJM0oYn9yamkS7qqsfW/iod9tRtU  
zrjy0Crd07o5NAVX3rZtbnJowSvzUwlFznxktT2Mfb+Wjw6rqZt+U3yopkxZ  
a64TYGSV3Ty7VgB1J61rxy1TcXbW8k5+eCoEyXyvPt00LKvny+kGaSipMuaY  
6qbDhmVmvPSPNGwJWhkV/SEdD8vYrtbB6WCb0Y4Zjgjh/yZxCW/xp9fp3s8f  
ykBm7kab88VC7H4Vz1rdnokGjaesNNsMmM4uN0tqz4Ke6JBxcXMG4lUlfZt  
IrzT6tW2YWfCuyqqauJWN05L1nw/0ZmJB+u5g2m1YtSY+AbtD8hCo1uf3cby  
HCg07D5V2ZMFJ/YXvIbZErQjr7RNfyXCxXLfmVgPEg92OmWyW0SIHnXfc7SO  
xPqWhs4Bp2xoGxP7t7vm4sJMj4va5WwMUaEvZddyEaLNE38yECOpUD/oonUe  
jk92sVvixXjNb6WKK/KQTL/Rr1CKkau4xmGY5EP1+S+twl050Hwhf5DwUz4q  
LNtVjS/lwENoYi8yKsDoyxOzIzQlaIhtNLQgCzAsP5hI/04ClW+i6svohTgX

qev3pE6CzBTvker0QvTKj0Rw1Ug8tr368dD7QrzkDB/l2ZH4+3fTP9/9KIVO  
V+deMYeEu7zOymxCcMVDUUR1PllfS9Rr7KakMJrQLt2XQMJB6r0JNSOFntKv  
bnLRZoJx94A5KVTEZI1TEon5AlvAlhqFdRYtwmYeiesrss4a6FFobTUyeZJG  
wirOT5fuSOGRv0/HiIREcXhlodlmCqmNS3YKSRL6wdMm9lspyJaNydblqkCx  
xbZerhTy+bGrjueRGLBt8hTtoHBu2L8wWkBC+ny9QN2bAmGe2Dh0loR096nl  
DF8KOa89uvhFJFLbmnOtD1BocOd2mxeTiFYElO46SCE9xvxM4E8k9uWTtwWH  
KVSecfP8S0bi98wBj/xgCrfOeQviSki48Wzayo5R8Ora1mtQsLmh9/+agql  
MHK12N37PIzh/WCOn6g0MEy5Ewumun/7esXERSY7Za+kjIS5P7qylkoCg4B  
jdvtykmo75l7+ymGgrj7b/0Hi/4PL/m9TQ==

"]]]]},

AspectRatio->0.6180339887498948,

Axes->{True, True},

AxesLabel->{None, None},

AxesOrigin->{0, 0},

DisplayFunction->Identity,

Frame->{{False, False}, {False, False}},

FrameLabel->{{None, None}, {None, None}},

FrameTicks->{{Automatic, Automatic}, {Automatic, Automatic}},

GridLines->{None, None},

GridLinesStyle->Directive[GrayLevel[0.5, 0.4]],

Method->{},

PlotRange->{{0, 1650.0365}, {0, 1329.931636}},

PlotRangeClipping->True,

PlotRangePadding->{{Scaled[0.02], Scaled[0.02]}, {Scaled[0.02], Scaled[0.05]}},

Ticks->{Automatic, Automatic}] \) \!\(\\*

GraphicsBox[{{},

{RGBColor[0.368417, 0.506779, 0.709798], PointSize[0.6], AbsoluteThickness[1.6],  
EdgeForm[{GrayLevel[0], Opacity[0.3]}]},

{RGBColor[0.368417, 0.506779, 0.709798], PointSize[0.6], AbsoluteThickness[1.6],  
EdgeForm[{GrayLevel[0], Opacity[0.3]}], PointBox[NCache[{Scaled[{Rational[1, 2],  
Rational[1, 2]}]}, {Scaled[{0.5, 0.5}]}]}]}},

AspectRatio->Full,

BaselinePosition->(Scaled[0.1] -> Baseline),

ImagePadding->Automatic,

ImageSize->{10, 10},

PlotRangePadding->None] \) blood

\!\(\\*

GraphicsBox[{{},

{RGBColor[0.880722, 0.611041, 0.142051], PointSize[0.6], AbsoluteThickness[1.6],  
EdgeForm[{GrayLevel[0], Opacity[0.3]}]},

{RGBColor[0.880722, 0.611041, 0.142051], PointSize[0.6], AbsoluteThickness[1.6],  
EdgeForm[{GrayLevel[0], Opacity[0.3]}], PointBox[NCache[{Scaled[{Rational[1, 2],  
Rational[1, 2]}]}, {Scaled[{0.5, 0.5}]}]}]}},

AspectRatio->Full,

BaselinePosition->(Scaled[0.1] -> Baseline),

ImagePadding->Automatic,

ImageSize->{10, 10},

PlotRangePadding->None] \) liver

\!\(\\*

```
GraphicsBox[{{},
{RGBColor[0.560181, 0.691569, 0.194885], PointSize[0.6], AbsoluteThickness[1.6],
EdgeForm[{GrayLevel[0], Opacity[0.3]}],
{RGBColor[0.560181, 0.691569, 0.194885], PointSize[0.6], AbsoluteThickness[1.6],
EdgeForm[{GrayLevel[0], Opacity[0.3]}], PointBox[NCache[{Scaled[{Rational[1, 2],
Rational[1, 2]}]}, {Scaled[{0.5, 0.5}]}]}]}],
AspectRatio->Full,
BaselinePosition->(Scaled[0.1] -> Baseline),
ImagePadding->Automatic,
ImageSize->{10, 10},
PlotRangePadding->None]\)      gi
```

```
(*-----
-----
-----next mouse*)
```

```
vn=readTac["C:\\Users\\exx\\Downloads\\pAM4, Liver 3.234625, GI 0.530875, ID
3848.csv"];
```

```
Lv=3.234625;
```

```
Gv=0.530875;
```

```
id=3848;
```

```
vn[[1]][[1]]
```



0.12746559200130417`}, {0.27073779576926765`, 0.1116266937044405},  
{0.3575112797365835, 0.046963725126600256`}, {0.4516394623155443, -  
0.04509050859182233}, {0.5394859823491253, -0.11115559892361665`},  
{0.6346872009943513, -0.12642564594664163`}, {0.7281522108132057, -  
0.07740196037964171}, {0.8153355580866803, 0.004179083230780074},  
{0.9098736039718, 0.08937493944143977}, {0.9999999090909091,  
0.12834702174618903`}}},

{GrayLevel[0.55], AbsoluteThickness[1.5], Opacity[1.],  
LineBox[{{9.09090909090909\*^-8, 9.090909090875369\*^-8},  
{0.0874367476365131, 0.07984396759533968}, {0.18222810297558026`,  
0.11939549826670079`}, {0.27073779576926765`, 0.09184904274707059},  
{0.3575112797365835, 0.017913117173780694`}, {0.4516394623155443, -  
0.07109962300031061}, {0.5394859823491253, -0.11717052830989395`},  
{0.6346872009943513, -0.09879571259704382}, {0.7281522108132057, -  
0.022693471356141894`}, {0.8153355580866803, 0.06128703302641453},  
{0.9098736039718, 0.11605625481609519`}, {0.9999999090909091,  
0.10415981267620744`}}},

{GrayLevel[0.55], AbsoluteThickness[1.5], Opacity[1.],  
LineBox[{{9.09090909090909\*^-8, 9.090909090870287\*^-8},  
{0.0874367476365131, 0.07879243663407876}, {0.18222810297558026`,  
0.1116081822210312}, {0.27073779576926765`, 0.07372482040530459},  
{0.3575112797365835, -0.006267252216927747}, {0.4516394623155443, -  
0.08743897872291118}, {0.5394859823491253, -0.11109134853087661`},  
{0.6346872009943513, -0.06371549528296311}, {0.7281522108132057,  
0.02544576624054603}, {0.8153355580866803, 0.09464282937855747},  
{0.9098736039718, 0.10731931496853601`}, {0.9999999090909091,  
0.0516787429232188}}},

{GrayLevel[0.55], AbsoluteThickness[1.5], Opacity[1.],  
LineBox[{{9.09090909090909\*^-8, 9.090909090865543\*^-8},  
{0.0874367476365131, 0.07774905743802465}, {0.18222810297558026`,  
0.10409673959866513`}, {0.27073779576926765`, 0.05716133039337165},  
{0.3575112797365835, -0.026084496726167965`}, {0.4516394623155443, -  
0.09591154799603378}, {0.5394859823491253, -0.09685594593277226},  
{0.6346872009943513, -0.02730376120671303}, {0.7281522108132057,  
0.061646715198529656`}, {0.8153355580866803, 0.1046634148537508},  
{0.9098736039718, 0.07509702498429204}, {0.9999999090909091, -  
0.006536873471333553}}},

{GrayLevel[0.55], AbsoluteThickness[1.5], Opacity[1.],  
LineBox[{{9.09090909090909\*^-8, 9.0909090908608\*^-8},  
{0.0874367476365131, 0.07671378556951527}, {0.18222810297558026`,  
0.09685439581479163}, {0.27073779576926765`, 0.042069810325321415`},  
{0.3575112797365835, -0.042006785469922474`}, {0.4516394623155443, -

0.09808544986431629}, {0.5394859823491253, -0.07760167026270944},  
{0.6346872009943513, 0.0063643674428021085}, {0.7281522108132057,  
0.08405712128907425}, {0.8153355580866803, 0.09555213349985489},  
{0.9098736039718, 0.03202960165577907}, {0.9999999090909091, -  
0.054402034659985464'}}]]},

AspectRatio->1,

Axes->{False, False},

AxesLabel->{None, None},

AxesOrigin->{0, 0},

Background->GrayLevel[0.93],

BaseStyle->{FontFamily -> "Arial"},

DisplayFunction->Identity,

Frame->{{True, True}, {True, True}},

FrameLabel->{{None, None}, {None, None}},

FrameStyle->Directive[Thickness[Tiny], GrayLevel[0.7]],

FrameTicks->{{None, None}, {None, None}},

GridLines->{None, None},

GridLinesStyle->Directive[GrayLevel[0.5, 0.4]],

ImageSize->{Automatic, 28.4375},

LabelStyle->{FontFamily -> "Arial"},

Method->{"ScalingFunctions" -> None},

PlotRange->{All, All},

PlotRangeClipping->True,

PlotRangePadding->{Automatic, Automatic},

Ticks->{Automatic, Automatic}] \) Expression: {Bl,Li,G}



Parameters: {k1,k2,k3,k4,k5,k6}

]

```
Manipulate[Show[ListPlot[vn[[1]],PlotRange->Full,PlotLegends-  
>{"blood","liver","gi"}],Plot[Through[model[k1,k2,k3,k4,k5,k6][t]],{t,0,1500},PlotRa  
nge->Full,PlotLegends-  
>{"Blood","Liver","Gi"}]],{k1,0.001,0.2},{k2,0.0001,0.1},{k3,1.*^-  
6,0.01},{k4,0.001,0.2},{k5,0.0001,0.01},{k6,0.0001,0.01}]
```

```
Manipulate[Show[ListPlot[vn[[1]], PlotRange -> Full,  
  
PlotLegends -> {"blood", "liver", "gi"}],  
  
Plot[Through[model[k1, k2, k3, k4, k5, k6][t]], {t, 0, 1500},  
  
PlotRange -> Full, PlotLegends -> {"Blood", "Liver", "Gi"}]],  
  
{k1, 0.001, 0.2}, {k2, 0.0001, 0.1}, {k3, 1.*^-6, 0.01}, {k4, 0.001, 0.2},  
  
{k5, 0.0001, 0.01}, {k6, 0.0001, 0.01}]
```

```
Clear[newmodel]
```

```
newmodel[k1_,k2_,k3_,k4_,k5_,k6_][i_,t_]:=Through[model[k1,k2,k3,k4,k5,k6][t],List  
][[i]]/;And@@NumericQ/@{k1,k2,k3,k4,k5,k6,i,t};
```

```
fit2=NonlinearModelFit[vn[[2]],{newmodel[k1,k2,k3,k4,k5,k6][i,t],{k1>=0},{k2>0},{  
k3>=0},{k4>=0},{k5>=0},{k6>=0}},{k1,0.008},{k2,0.0001},{k3,0.0014},{k4,0.001`  
},{k5,0.008},{k6,0.0001}},{i,t}]
```

```
FittedModel[newmodel[0.0838619,5.86338*10^-  
13,<<22>>,<<23>>,0.164717,5.86338*10^-13][i,t]]
```

```
{fit2["AdjustedRSquared"],fit2["AIC"]}
```

FittedModel::constr: The property values {AIC} assume an unconstrained model. The results for these properties may not be valid, particularly if the fitted parameters are near a constraint boundary. >>

{0.877065,929.304}

fit2["ParameterTable"]

FittedModel::constr: The property values {ParameterTable} assume an unconstrained model. The results for these properties may not be valid, particularly if the fitted parameters are near a constraint boundary. >>

|    | Estimate       | Standard Error | t-Statistic    | P-Value      |
|----|----------------|----------------|----------------|--------------|
| k1 | 0.0838619      | 0.037972       | 2.20852        | 0.0306861    |
| k2 | 5.86338*10^-13 | 0.000521521    | 1.12428*10^-9  | 1            |
| k3 | 0.000580522    | 0.000135022    | 4.29945        | 0.0000577074 |
| k4 | 5.86338*10^-13 | 0.0021075      | 2.78215*10^-10 | 1            |
| k5 | 0.164717       | 0.0746215      | 2.20736        | 0.0307708    |
| k6 | 5.86338*10^-13 | 0.00031892     | 1.83851*10^-9  | 1            |

```
Show[ListPlot[vn[[1]],PlotRange->Full,PlotLegends->{"blood","liver","gi"}],Plot[{fit2[1,t],fit2[2,t],fit2[3,t]},{t,0,1501},PlotRange->Full]
```

\\(\^\*

GraphicsBox[{{}, {}],

{RGBColor[0.368417, 0.506779, 0.709798], PointSize[0.016666666666666666`], AbsoluteThickness[1.6], PointBox[CompressedData["

1:eJxTTMoPSmViYGCQAGIQDQEqDvcWFUw7tOyXPYRv5zD34Z53j7NzHSB8TwdD

pW/rliUQ/gNgQ6RMprbYuPLofwwh0k8U/ID2/Og/GiH+qJTk/RXJ0P4DgkO

Egnyc3dtjYLwDyQ5zH36hHv3gVCofKpDclyG1uwzgVD5dlebEs5B7x75QeWz

HJ700IBzWsQTKp/jsPTrtG/f/rtB5fMduPL2cm667QzhPyhwiBJud174wwnC

Vyhy4HeCbXvmoSOEv6DEoa5SavInd6h8QoWD1IFohYN3oPIKNQ4zFmhve7fc  
AWpevYPQk7DvdUftIPwLjQ4njbrYljJA+QXtDpZ7jy7KXWgN4WdMcLg+8SZ/  
uoQlhC8x1UHKtMGY47Clw9kzZ87wnJjp8OnEYpcH3DYOAEF7eKk=

"}],

{RGBColor[0.880722, 0.611041, 0.142051], PointSize[0.016666666666666666`],  
AbsoluteThickness[1.6], PointBox[CompressedData["

1:e]xTTMoPSmViYGCQAGIQDQEqDuHckys9X7M4QPh2Djbr0/dZekZD+Z4OclJi  
i9e9T4PwGwldTj9Jca+flA7lhzlYX54q2TA7C8qPdnh07JLO1twCCN8hwSFt  
2wWr/PpiCP9AksO9edeUH7eUQuVTHVxcqtns1pZB5dMdDu6t+XN+WjlUPsth  
872djvfSKqDyOQ52O2M2c9+A8h3yHVlijkpilRC+A8KHBbOSPT4bAHIKxQ5  
GGZLFAkxh/IXlDi0dCVcWqcN5SdUOGzJ3eutdwRqnkKNg9a8I4Z3hKH8B/UO  
5xnOXrsQDHXPhUaHD//t7Gqyoe4taHe40ffZg3cO1H8ZExxWigkebdGH+l9i  
qkPFqt7fc15n05w9c+YMz4mZDuf2M9IWSmQ6AADGIneK

"}],

{RGBColor[0.560181, 0.691569, 0.194885], PointSize[0.016666666666666666`],  
AbsoluteThickness[1.6], PointBox[CompressedData["

1:e]xTTMoPSmViYGCQAGIQDQEqDodvXta5Gv/LHsK3c/g9/f9rc2UjBwjf00Ha  
00L68XMHCL8h00EIg3+122w3KD/MgbNTfMcvZT8oP9pBd20JmfdNLwjflcHh  
ulhttp+I3qPoDSQ5K13zfM2/0gMqnOvQt52u/X+MLIU93EHpXc4drQxBUPstB  
l33PEftl4VD5HifvsTlbH02Jg8rnO+g+/jD5y6ckCP9BgcOPG0zPP5amQfgK  
RQ4Op1cGi0zIgvAXlDgs+vLak+1qAYSfUOFw+20BD0NNGVR9jUM4y5JF0zRq  
oebVO7BnCD0E2DdB+BcaHUSPN4bP7mqF8AvaHZK1DwuXyvdd+BkTHPxtLz1Q  
a5kK4UtMdfDiYdJOnzbd4eyZM2d4Tsx0MPD4taVrykwHAH+OdhA=

"}], {}, {}, {}, {}.

{RGBColor[0.368417, 0.506779, 0.709798], AbsoluteThickness[1.6], Opacity[1.],  
LineBox[CompressedData["

1:eJwVmXc41V8YwCUjlHmvrWQTkk059zVCIXvL3nvv7BUyQyRpmkl2QtNlPdKO  
pEjZI9njd35/3efzn095zzv0085zDzv6GbmQk5GRLe0II/v/98TfT4sBDGsk  
dtJiq/veS/A9+1f9TOg3krBoKnMDZwHE9vEE1YbOkqZsqa2GOPih1Xlcc5F9  
hcSt8pz9EE0uvB5XMskM3SaFnQzw4nHKgoyG3noWT3Io7wg9ssqRAXcDAxV+  
sFMBmYLF3u4jafB0mqerrpcGnkAd672sZFhd6tWIDj0Al6VX//1TSoQLlvd/  
3cxjhFt/Y7YfCcbD1fv0VXSezDDKdFJUqjAG7nE4eweqEkAnkpSSpBUFTyPu  
H/3CzgrUmVJXXUzC4cMX+r+kBTZYtv1QMd0QAr+VnFtu93JAGT3bIU2rIFgv  
vh9x4CoX3NQQqMlXCwC6DXqV4FAesI1QVCl+7gvcVs5kQ3qH4IUqzNuEeAHb  
t+Ef5Xm8cKXKg+bUOXfgvZCqbhJzGGqPLq+6fHIBURXpW9SefPDee9R+INIJ  
pGeHqR6Y8kPM4TL3AjsHOH4l1d1XVQA2xjKZzbdTQUNPuv+whCCYxj33Tb5h  
DXrbw0c+sAvBDu818+DbFmB2J/VCGoUwjKYgaa4tU7A7Kz1/fEEYVA/+Gk+/  
bAzuB74ZzA+JwNv5qLjn0YYQ0JnacL1XFJouSh/xP6YPkT7SBLNGMYCafXfW  
3+pAls+3EJqrR4AiLIHhx2ttyHyV+qkjXRw8hWz5GA5rQsE5aSX/UAmY9SHF  
xneoQ5nEtx]+R0l4pnjNqbJEFW5/S936qHcUpvx+3hlyIcFnTY6j3dxScIzF  
ffQB2QkYLpv7XpYnBYW6902L1hVhdOVpTvi+Y/DQKn1WVVMefp0pVjWKOQZp  
2foetd9kYOq279KR5WPA4P604WnrMZjbUb9B6SkNTy/TfrhRchSWzDhMvn+X  
Bom1i4sDR8VhtW604r6pDOQw2vjl8IvCFtWz5rwXMnA9nmOn3ksIyOyKXb1V  
ZYGf2suGaZcfKfP92TRbZSHWc3Y088NhoGHQ6DskIQfLF752PX59C0jdOCLW  
r8uByIVpJGHHDcwP50TfscsDn/zRv2/1OICV7dnX2ix5QE9LtB1zWYHLrzgj  
hUIB4hOLY+/wEoC31/eEfaQChBRlqCX/ZQKBQxqzSgsKMN4v/rOUnBFewjjK  
WFwVYeHddu33rP0g8XruzOyQlihq+ZbhdOAtPCz3R5DJci++VJJv5UK5GOL  
68t7IYDANnM1Xo0CID/50kSqKIP06+X+BiZyIB3VYDZpVAb5vrC7KTxkoJHK

8VRC9Di8biinGenaImI/nwuiivnoc/n01fClyY52kq/BM4AfhBNAWLK3EfFsh  
GWYXf2hPPwE6EU4lOc7LJLPfvikXyVRg9P76DKPUEsmKpKHgG6oCNzZPfbis  
uECSTBUr07aiAluGP2qVK2di5K8ZKf+FIJg9VPpLx2CS9JF11avtH4L89kce  
SjYTpBrbb4NRISQoUvLxsHk0Roq7/VSJ9I8EVLm1/l6BP0hiqyYG8coArIlp  
vFcHR0gErr69TpEA1b63zu1RHilto00tGu0A3Zrs+17t/0z641jnKbQBIJ0u  
GxmOPpAGUw4f3KesCiOm+1yWng6SOqovvp2MUAWquLLm4Pw3ploB6uQX91WB  
nC9zrU37FSlvKVLxzroq2I/cDWUceU6KZp2bzIJSg+efSfLBX3pIrsoOV/Oj  
1EBHI2F1XfIZycD2vZHRFTUYvDFdxPv+MUK5QYtKdl0NtFPCakixD0kCt9vv  
E5XUoaVi8HjM4AMSfb+Ez2q40jDZ0fpE5beR1mfLeb+0qYNxDbm/f3MzaZyJ  
8L59TR1q+hc26CQaSQNyqamlihqQeOBI2+mFelKb5YZyTLgGBD/YvNg2c4d0  
/ZzPnF2bBrzQI38451tNyrw2ek11TQOubNU7eVtWkEK7jU35FU/CxsY7Q7Ly  
myT7yZ59lOEnlehKMMemwnWSzghljonWk9B5ku3KIFs5Sf7YHb++1ZNgFftS  
55RvKYnXlJe/WkETyu88ceDjKSbRRuR/zAjTBLZylZC9RwtJy6VU6T6tmjCi  
nMDieymfNPIoQkV/VRN+e4adFtXPJfWNzyxIKWhBzhB/lt7FLFLDPvubzGFa  
ELP1pGSdPIN0Rfyd+XKLFhSHXb4s0ZxKSjPQPu4ogX1o5sDiSzjPMDg+12t  
8trg+FZBlqosgWRzSTywOFQb7t/fnl4MiCNpdlwVjGrRhttpQTYXUA+diUqPM  
X2xWtKHqW25tX1UEiZMiJRPJn4IWcXkC1ISSKETWSbyhp+BM1RytFFUwaV7H  
+++ellPwYatVnL0+gPTV7/vtsX+noICx3TaP5Ed6lm9k1S13GqjOWh7UKPEi  
1bV2H6gIOQ1HVSSXjm4ky4NKT50az4NzAzzcznnXUgJuzXBnv90A1Pv0YFT  
VE4kb/5DIrpyOuCRub1KN2BPMtPKG5II0YEzr37JqtWfjal6UWYzNOvAQh41  
Y4iSFUk801xtcVkh5Es80k6ImZNYG6f/DcrqAsGP4vfpUBMS2SfbqqZgXXj8  
raL5CIsRaWrjrU1hky4lCuRxp83pk94fPMkYvqwLDwMac77K6pK61NqeWsrq  
wUqHZqfBlDap0vVI2PFgPjSTPX5GLkmKS+9TIynSQ/av1mb9furk6LrmEZ2

/upBWwnnFQlxVZLrYFLuqMwZuPpD+ViwGSIZrKxqPAk6A0ZzZ+qdXiqTjnN6  
rd1oPAN+ /DeyJ2sUSM9+hiycmj8DnQ9Z0w4T5Ui6NXF/5sX04elBd+WuHmnS  
h6CM0QJXfaC74fGK4r4UyfZE4efj1/WhU7TrVfBzCdJvimtvfnzTh6lpuQM+  
qWKktgnT8af7DUBRX74gs1yYtHXaerRQzADIR9iOrdMKklTv2g97aBvAyGBX  
zP10PIIKi+vnE64GcPz39u5YPS+pP8zrPUOSAei96reXeMBDoh/2f/PzmgEk  
evA55Edykowg9GXzQwNI9m7iVSxgIxXejOpL+2YA8;Z0TLNkRNLQvvhn1psG  
IFYWZN7bxEzi9Ul5JmlhCG2PThdzVDGSnN9mdOxRMIT9VZwXmO4cIFXK5ba9  
NzGED/Vvt/l8aUmzxYVNFYGGQGq4TsebTk2S3rlcH5ljCCVT+7SnVihIoY7X  
avXqDCH+WLPtTg05qb3ndiXvS0PYSdpFh6+RkXbEam/+nTSEwrR/B3bKtpFa  
9r3yHmojMPqiOdLosIFS/7aUFgsagaWjTfH3mFX00rzjkre6ETy3Dz7M07uM  
GDseXyQ5GEFUp9CQ+Y0lZMLbm8McaWTSmmLtxsUL6FLSy8xfpUbQ8P3NNeHc  
WTT8521aW7sRvN79K+hhOoU0631KyvhsBFNW+qWDQb+R673hONsVI+jT2rKR  
HBtH1cSf0ccI xvBO+U1YWMIPNBfx05xC2hjC1mfUQnJHkczITPAnfWPQ2P9x  
QjXxGwpXW/Kv9jEGGdXbdBKnvqK026ve5zKMYfgi9Z49Hp8QGd22u0GVMQTt  
UD4q+PieafiRu/D3GoNe55c/67mDKO0dtpKuDEsGj4bmjv/Br1SOHD2Obkj  
UN21mZ0IeYWYS5ktS3lN4HMPTHiq9CMzMnZTP2QCDVTvQ6tse1GJM4+hmo0J  
1HBTH81+8wyN9PHpESNNQJX7smlI+hPEJyFy6k+RCbDzn09vTnyE3HllTj5o  
NoEmS6+fUh6dqPaftGrWOxNYtbuR9exo01qwVFRxWDQB3sUg6n0GrUi2S0VJ  
lsEUbAu+MN541oQi+NTlqCVMga91j9e7mAbUlaJ970tpU8jNCq3tCa9H5NN6  
EnfcTaFHaIk63+IO0tQ3Fo1LMYW1oy0LAKLVKL3RQtD4pin4hld49OtWoAE2  
28NCT0xhW+ayi9jTm4gl2oln/bspZJDWf87EXUcWo+4cL7dNqepnjG35uXJU  
quFLvMplBumHegs+Ol5Bo5VBTIFKZuD5RtjISrIECRyIOHDS3AwubhaWy5kU  
IfeAGBr2EDMo0HtcWd1/Ed35kEg5nWcGg7/DIALS8tCS0vk9XfVm0HaF/7tB

Sg6SL8vazhkwA3SRpSMq8gKqub4kOzBtBmaDDnsDrdMRb4WZNx2NOZwwrf78  
KDcVFda039AWMocZ/ntuNGzJiK7+4FCyujn8UD8alfgjAcU1JTA/tTeHL03G  
C72/4tBK28Qpshhz+JpepKMhF408Ok/Hq1w2h5FkSvmY1Ug0+riuLbLNHOwn  
H07VsYQj0x7mhdYP5mC7R3epIDYE9feHCv9bModFXTWuKakgBK+/2kozWsDN  
QFPOAJ4A1PwOFfpJWECcpJGNUJlvEvt8/VXtaQvgX545TVTyQuXDVJRTbhZQ  
La4g2K3njog/PE8IJ1vA14EZBt0WF5T+ayDI+boFBJ/7xRbm6oR2J6Vrrj20  
gBMnByM79B1Q8Fzhz5FhzPVUYvHfbNHU0gYH94YFcHkvvqRktUZ2q7aGlmyW  
cKbLeYSm1AK933ySVihrCeQmT/jPc5mh02TCj94ZWoI43Q3xn2PG6CFFxiqj  
nyWsB7yavjtuiGRp5iXPZFqCWZqqwxKPAao6YOyaUWUJ8aU7HMaH9NBB5tYr  
fT2WsNx3XOFg0GI0kZXrA+W4JbRb058/wayNaLhi96vvsQLOjH/DJyZOophD  
Y+pxB62AzHz+2KF5dbTMrxXVedwK7B8apo2JqyEPkZqGDQsreL15bTD3KqAR  
cYYphVAriLlLU7pehJDxsaDDIfWEGj3TVPP7AnUJ/fjoqHeCnyng0orIpUR  
Uj6eM/8Ky1NIyKcZVksN6Gqv+LQVWAl38gn4KCAR9b27HvusQfPqF+jgkEdl  
Wm7yFYLWwJiYOV74Shax6L7wGvezhp6WdlqIYBmUZnD01mF7azA7eL5leOMY  
2jbJH7Y9Z43v54mLbqelUKDIKktpCf7+WNPPzWvi6M9Za50vrdYQ+Ftcx+6v  
MDrr+DCB9YM1NAvo6Sfa86FBV/524yVrUPhEPr+WzIa0vVIXcxhsYN5NofgO  
NyXq9JswGRC3Ad4SuVvSRq9VpIP17elO20BH7M3494tTnRXhjUXabjaw4Hvo  
sWDAUCf30bbXyUk2wL7Mr7Y1/10Lz6K6uk1GziW/ZLZ3nVNhTrluwrZQxsY  
j4ZKvgZyFJ2uHqlybAP79rou5MdSo6WsitrlDRsooRF1eKZDh9zy6cZbWc/C  
3IGV46yXDqDhIj+ufzJnIa4oguu0Ij0yLH1nJG14Fo4jNPfMhh71lCuk+/me  
hX213CsO6fToxK3Lj2sz8P7LxXdeCjOge1W7a5OVZ+EsgfNz3T5GJFTnJcXc  
cxaYjTeyTyUyotKGXjfnspbAme4T07KXCaU8yP44wmMLxtbTs7tEZjS/GRZV  
qGILi7iCsiU3mZHFCXveM2dtQe2bYv4Tbhb0OFq7m/KcLWiZiNJFxFxLagsU4p

z85SW9gt/ne58zkLyt9mZwjpsIVbnES787ssaEtlT5P4sC3UjUnSbooSkGvM  
pMX4pi1cXXPMeaxDQK+73m5f5rKDDMt7i8POBKS4e/+68XE7kKfilNQLIaDr  
p0tadNZ2AHMT1PQxBEQXlz7zJNIOrvGGB4QIElDwo8DcyBI7W0ijchlPI6Bv  
ZNby0u12wMxaMZGTS0CaqupDk1/s4KOv7UZbOQHdjT8Sd20dr8/13bx0n4D2  
/zifV7vfHspuy//x+k5AsGfHOY3bHvRaPfp9iUQUcjhQwVncHjblP5/5ZktE  
1aoTNHDCHqJQRsTfLilacbAa5tK1h5KJjDOziqyIJWGgbtXaHkjaY2+p3rAi  
7etq8e+87EExuoQ60pUNRT9pMb4bZQ9nLrf/TXNkR/d+igllZNiDf5duiYcz  
B5ogv7rmetkevHYsdy1zOBEnP8sLtrp72AqaFiqc5EL66qlXDj6wBwFFWqJV  
EA9Kctr02+i3h9tOD1/9kDqE2hL91D5+tYdS6vTqpjxeNhtjNAwZQ8rVWnm  
rNWHEd8z898XNrB+gqPzMqN8yGz8xX0PWgdw7lL2alYQQ0kUkHmS0wHeBK9e  
q+gQRA8FmmwPizlAR0h0q0GwMFrWEDm2reQA++08Tyc6iCIRl9K9X045QPmA  
wzpT6hF0NpnxY50lA/Q57nV6/VsC5d1KqszxcIDa4VvmLXUp1NO9Fukd4QCc  
bU7+jI3H00Yvbz3t8w7wNY/IcUdDBklR/TgkUIz5wVmbLHVZ5CcxkurRb6QBr  
8ZnnKd/Jo2LN58+G2hwgXHZpPn9QE24qhS19jmAMt/3kZJ1ZUSees8j/7MD  
HCy5cSvxlApSqBA84ffHAXyms/Nbn5JQ+e8DP4T20cJINSOTcZkaek+d0EjO  
7gi2KY31HIc0EI3ISvKIsCNcmUIP+Nx6EgW6j4gVajnC2kqYNZPsKVSRZrQd  
Y04IMlP7i2z66Dhyp7Xem600DcRe1aPXQ8xPle+LhrmCllPKTZSxs6gk5N1  
wZSpjtCRo683w2CAImn4tX4UOkKZtFjhBwMDVCdaxNF52xFerRMGGg8aoLFT  
dDOXWhyBdEzwU2jvGcTuGdsV3OMIhlON5U+ldZFu+t8cg4+OUK71PfOb5CkU  
X+3mJD7hCMInlikM9miilv4huX0rjmDJkrAu904NTU3p7xundAKzU2ttJpdJ  
SHN5crqe4AQC08Uh4ueV0fXtxNfn+J1g+xZ6G8kjj3aoDjaelnaCX4HZxysU  
pZE1Y1shm6oT700sNrg5K4HaOlwix/WdoP3fo03haRFE4J85e8/WCaKT9d70  
3xRE/ulpqjE+TmD04dUnJTMB9FKOV1An2gn8909VVN8UQCKk9n3sGU7QaHVu



filVECVpm8yMFzvB8j00aHkghEYN517fq3SCUQ30KbQrjFSs0xpjWp1ATvOr  
yicmUTzv8RXp9DhBzJ+mjOcNomjFpyOS/YMTzBvpw5eXosgozMz21xjWv7tz  
0P28KKqLW1BtWHICC7Ve4UOTIog2PV0wdo8zaPZ5kbamhZFrvgCNLqMzNjrX  
cJDiCaEnpV0z7IecYR8P48ALOkF06LbFm18SzsB61jn62S1+FH13qbHhhDNE  
05ajfsL95XNbZlGsjjPoSHR92KtyGMk+EYrStXIG786ncaeVeVHOi0e2HB70  
803qjxfb9QfRzHsrtYkwZyBb3j3dIsmDtEeWBRTnEEv0+VZxywXuvk7iyau  
wBmeujMrMs1xoj2LlrO6N53B4jzV7cajnMh248kbjkZn4BbY+fc2lgO17z3b  
NPHYGQZ+0TctWHEg1gOrRY1vnMGchfrBoAIHCmTNjYr77gzVo3nvzFQ50MCh  
I3Z6c87QHm87YR3CgcREu9U4t50hXlx1+NFbDpQibSf0m84FPt07XnE24URj  
x9dpmjgxO24wC21yljiZPxsngluVrGC40+5UOkZibd6ii5gK3qt81wtN1rD  
rypOLRd4snf/s7cNPMjEweHSb1MXSObxPvzw/UFU77kZ1eTsAnof502Y9/Gi  
/cEFdvFBLhDhN/LY/x4v6k55LsSV6wKR70yjnA7xlb4cJ9o/V11AenmQzO0L  
H4op3p5tqnMBz8inHA65/Ei+9ljzmZcuoH/GlefvkgDKa35xiWvIBRzdXrK4  
XxJec10u0X8mXWAg+kDzBRkhdLpv1655zQVOBu9NNXoihCreFqsnULtCskwa  
wy01YUQxjCOsz+oKMuh74MahJH9+CtabkFX2L16y/oOgwjqmHWb+yPjCtFY  
l8TAQgSxr+4ZbFZzhdfzsn2c6SlomKy00cHQFZTtot08fuSGC3tDIF+vbu8Lg  
9lIDx2siSjzITTS3nyuo0Y82vE8RQee5Pe0nz7mCVdojwc+mImhCkEKjJdMV  
+DjCVM8eEEFqR8uEEy+7wl2fqCsmtcKoTFGRzqDaFShkTr6tOyaMNIQH57jv  
u4I4q26wTakQMvCQpBF+7gp1yg03pYYE0e2cdP5jX1zBbL7iDfuaANpqnVA5  
PukKA88M4h4s8iPj72oWJ9ddoUoHNB728KFqqquB+jRucUwV90fchiRSW5m  
WnK4wTv7G8n7Ng8hM1PzCidRN9C065YVvM+NaqMbH/soucHoyWNxivwciPwm  
w3DYKTeIYzDSsAwnlosXXivxlm7AY/nMWJ7EjOqWehgzPdwghBAWajJDjyg5  
BY4URrjBjSpLAq0kLbJRjTtZft4NZE6zl0soUKEG92G76mI3uFlepmi3SY72

5ShGNIW5waf+D1vllwzZtl682HXfDdZY9Nm+Um2rNI0s1PU9d4MUtEnNcnZD  
hZZK7/ngFzfoKkqk8ehZU7GXqBobnnSDnWsPLLnF1lRaTSh3JtbdoOV7qLyP  
35oKfbQD+yKNOxi9S/t2+dy6ivONTulNDndg3H2W+ef4pkp7P4cepZg72Pza  
ic/P3VZhXApXy1B2B12K5HNz0mTilWMwnu0001z8N1xC/mYP6gDJUn4rd2im  
XlS4nb8XeWRPvFGIdAf3/GVv7rPU6FGL2rRqOpaX3ap29DQNYh0po9QtcYeB  
+m8sRuJ0yJty85BZtTvsv2+wK7C6Hz0RN1e2b3eHUx4b/Npl9IjdpNHES98d  
rFQd39yhZUS+UQx+wV/dAZx0+3crGNGz617nY6bcofONU6iyCBPi6u+9kbbh  
DpThx7uc85lQ4CJ/Vx6tBzR/ivjKPM2E+tjjPpdyesCkJrnpWylmdBCGl26L  
ecBz7rZWcVdmFOymeOCesgeE1sdk3stkRv1ZF4UfnPYABkulsz03mBFvy4Jq  
t5UHtPi8aPRoZEah33RtXnt64KGCnb0lhRm9oqgK/RLpAfcU9nLa3mNGAuKU  
uWPPHqB12U9IDs+bkcYONbMIHuDbC/R/85jRm8j07tVqvM5ixboezYyErnOM  
7nngAcsfyr5nOjOj60chG3QvPKDAdemvsg4zGlx4S2Ad8gAdbSvV2dLMSIRd  
8ijvtAconDEWZOdmRrGk9FNimx4QbixsZk/DjD66TjjJ0nmCdGLR+vImExLP  
UotBXJ6QLJta7PiPCSU0l13SPulJeV1fHsqtMqHPwxsNRsc9ISI8cGWDnBlJ  
Upi/stHxB0v7sr2lkxklHWn87WrtCZaf93ZcQMzoqxEDeYCXJ1wUf2obHMCM  
jkV6cUdFeQLNrmioTxMzSrvWK5+c4QnN75oXkzaZ0Ugfv2H2ZU/YPFOYqarC  
gmQXYr2KazxBNNC3+UMEC0pnG06+8cAT0tGPr0H3WNB61u9OxxeesPxi+4rX  
GAtyp/r77/CQJ+zMOBZvMhLQx3M7Ej+mPOGkVkCKsTIBnfxH41q+4QkB5aY8  
N+wIqMmbWgZH6wU8WbTsnPEExDf0+/EgpxdMdpsd/VNGQLnW4vQjol4Q8U+P  
WwXPy2TvFDSvKHmBd//eS9pvCMj3tHqMzSkvcFjKsFYex/P34zMtXJZesMm5  
cUjtHwHpKlnNfXX3gi+LDmXZe4movd5FqCTcCy4LfMo2YiAiUZEAW8s0L/hp  
730nnZ2ILl2NLmS/5AX6Jor1q4eliIotbeBThRck10oYKgnieTwrn6qo1Qu4  
2B6cuitCROOUV5FZrxc8UC0xOi9GREbnqkOJn7xg79ctgVXMj5eb695PeEHe

hZUIEcXs3o8n8le8gJb2Mq0e3l829vKgMZU30G1vZ1/E8g9YfzZjZvUGOYLM  
U0k+IooeHMT6K+gNzEMWSipYn6lT8z05ct4QYDzWnH2QiCwfb+zon/QG/2s2  
3ht4vU+RSoHB1BtSMhSyNPiJSL6eyW/A2RvEPk/oyuHzbgzVFWI9oYPet++  
5EsSEeGqyHfdJG/YbrjgKixPRAmssmz7L3oD54CnQCsiIntKndT0Rm8gQ0j6  
b0MiGog2e3jqQTeM8KcHsdKQkcqyw+q+d95w7lPBuJ0rEdV6+Rzt++kNbof3  
x6T5ExHnWLhb6pl3sPTZBVhEEtF5q6SrmuQ+sJG7d6EwkYjW3mZ/omT2gyfT  
nkfoMonl9dRlhu7DPmBaRWUanU9EHx7d1ko65gNtiTpl94qJSEOXIVzd1Qfk  
LtcoBpYRUcPdZlZyQx9QbSk2Tb5GRlEfn88/tsf7L6cJNVwnopyy98Lx/j4w  
yTg9/BCv7xBH7SDOB4K/yVSH4P0+F6aLdrN9wKf3w8OSS0Q0TLH6uuuqD+gV  
qOuvZBPR6WjyfTF3fSDjwMJ5/SQiuV/3AKg89IH6yFaNvhAiEvHiCN8a8IG0  
G40HCrD9lFZSfyLnflAq4FdTiRYRPVKw7QuT8IUT/QaFj/YRkeRdDzIFFV84  
8xe1C64T0BWhEMUVXV/wIEa8vjtJQHEzmpgb18oWc684PqCgOT+3k8LqPGF  
hVmTwr48AnppPP32cLsvUHRkp110ISDHjm6uwT5fClsrnv4dSUBrhDPOCZ98  
YfhsFKnNj4CyQmLvSE/4QncoomBzISCBj/UrP5d9oWd2+j69NQE9kP9Jyt/r  
BwG/MkerDAnIqljlvDqzH1jEia0taRPQn1WNwb+8fsD041XcMhBQjEUo182j  
fiAhFrfrpkRAhPsVzibID0gxp3+dliGgao4vdyj0/ODrrtzjJgkCUo2kXW2y  
9oPctzr0e/D7+/PX4+Di6QerxAjdZUGcv8d9zhMj/ODqPOeWJx8BUZSWDXan  
+gF3/ETpFV4CKtl6zRVa6Ad7ZsnuDh8iIKmze1yEbnBqGlQgzRe7+mUrvvY  
6Ad6l5rC1YcJyOag82rKEz8Yqky6oCdAQH9jCkDhrR/wfJZzERYhoPTvPed/  
f/eD21lOkmpYP15YGyya8wPqeVaPSqx/S7kot/a2H3zgsixwPk5At+PuSG9R  
+sMNBmZeA0CWpTSNDc54A97XeQE7NMnoBM/RqJqCf6Q1vPuKSX2Z1puWDkF  
tz/0xtS2JLgT0DtVxm4bfn8wqFflSg8joINLlZNNYv7Af/RBR1syAXleV6U/  
IO0PUrq/ZzJzCKjZ6Ku0i5I/qB4gzMpcwvVub5B5J/hDMvddraFSAtJppIsm

avuDpIBQaj2uj4VON8t99P3BY2BC7scVAvrBotLdbYa523akpISAxJ99mOSx  
9Qfrxk1augICCgv2pQ918Qc/tSOadhcl6IkAtcyAtz985Lbm7E4klPoPV82F  
gv2hY2aNyTOcgCyTFaNjovzBzCawNcqLgG7KvS3/mOAPb4hyBcJnCWjhl0e3  
ZLo/WD6tk7usR0Apmpfpv1/yB9sb5/5kHyGgBuqdclKLPzgS0pSqR1nQdmth  
d1GnPXTS7THMfsWCtN2PTs0/w/u1y2Iq21nQ9z57mfj3/qB+fOukRCELEotY  
N1/76g+vTl5a/pvEgkJF86INfvpDOWIYuxnMgh5/EbtWOekPS68HLvu4sKD9  
6U+7yRb9Yf6GRIWUOQsyV7aZsljD8XAeKdg6zYKuTy3T39v1h+oOmhkeYEGz  
JRdkaKgDoM9UVv6AAgtS1BGycKAPAP2vL3ZWj7KgxM2u6PvEAPBfVnlDd4QF  
DdSYX2PiCQDrM2uyoSIsiNNmodtDIABQnnurM2aX/eenHh8JAB3PrR8U+Pu6  
FwnVbTIB8LpIke7gMRa0kh7tefd4AHwRvN/5VpkFodOhYrfVA+B9rC6tlTYL  
SqHxnyrVCYAjTI/3LFri8/o8qvONA+D0yV9Nb/xYEGuak2e6dQBcSU2VIUln  
QbZaZ8XinQIgSz0016iKBd2mMp8K8woAlOObnhv271y3QbVvUABo/zussbrl  
guSTT3u6RAXAEmWTITcLzmcNDTGbxADov6L5fkOKgHr3oimjjAA4z7FXrFWH  
gBifKISfyg+A0Q/M90KcCMgi4ZgnXA6ApKNXe63w/ShXPSKmcCMAJBLfvkhP  
x/WCTHBKoiYA8iTecYnh+yf16GC1QGMAuGe8Ip6tIKDwWHZPrgcB4LI+yabd  
QECPELMY89MAIL03jGN4QED7duim9r0Igdvhknc+PSYgg07K6t3BAHBWr9p6  
1kNAI6J3PVa+BgBn7vTLzcecENHp8XXT2ZwAkdx2MLsf1UnRzaXJsCsdHxNv9  
E+bA9pmqr0sBYHRke/5ZPwG1R0x4vN0IgEMcm/4X+giIXGIUtI88ECL9sk+Z  
dhPQ6bUvk120gcDmOfyJ8Pl5re+qmpkDoc6fNzK4g4C+hr7yqOUMhL/f/bII  
rTh//z2aLBYLBAev6eQjNfi+N7VX5UgHwgp4Ck7fjKCNoCaPVOVAYF4qv1uJ  
81VNpk40Ri0QPifaEtJwfmcsVUwGnw6EJsuhrTpc39/fu1blZRQIFc+PRQPO  
T+6Ayx6OVogwnvrL1iGNgJylCkQtHQPbbvHQXvkkAqqdz5rU9wyEHEfa3p9x  
BLRcl1alGRgIoDiwLzMG1yffBA+VyEAQeX1RyOwcASVJRIVKJgTCZmJqjAvm

lzMhk2LpgeDf+Np3BH9PqPWrOpwXCKi90PQXnsdsvDw82EsCgfMfZW4Z7jc3  
xZxEGa4HQvsjzVhJrN/spM0kZXUgvl9liLmP64t8lVnV1r1A4D33c8apHN8v  
dwOPv/cDYebX25snanF9+a0+Ofo8EPil9N/1PyEgs9sqVZ/eBgJTyCefqFcE  
VOai4DHwJRC2Jo13ej4RkOS42OSDyUA42BQ4LD5NQKE3BKoaFgMh5t59Ns1l  
AupyPOhRtR4IUkeRwNoWAen/YJospAmCoU3tTIEDeJ4rp6u6wBQE00tBH64Q  
iGjUjtIjiSMlutsFX9zhliL/kbU/AajBULDfrSgbz0e6ecnHfkgFwZyVxlMy  
PB+JaDJHGijdc4cPYIMEVFslD15SAoCHoa6nucKWN6dI3RHtYKAe2vPQ94T  
RNTh0GZcdiYlhG7N97ADPp94svSAWRC8efXV9546EQU/fzsefTYI7ioJa01p  
EpHBOVuJGecgMK9VHH1yiojEj02HWHsHgc1kYL+yLhHt+xXW1R8UBCZNSoWG  
Z/C8eYmCWjkqCAbfLLyjMsDzhW6ufIVCEPiQb7FY4fksvKl6NDU3CDQbrwx/  
NsLzJvezANfyIEgZOxHUj3n/G4P2DxVBYLf8TFYC85/Eb+Qn7wbB67urVkwf  
/mcKnjpNLUHg/UUx9Jk+EZVPr+TzdwVBn+wM65oenkevJg7ndQdBZHLIq24d  
/L42ZhQkfxUErNmKYhJYf1nqKz4B74NAiljcKYHtY3wg2jI6h00Z2mDrVSOi  
Gd+WHf2xIDh26/HzNTxf9vGpaz2cCgJVeUOnJ8pEdPPj62zJpSDgMzoQwo/n  
0bh0m89X1oPAo8Mym+sYEdmgSd4De4IhYzK1d/cIESkuhXhE7wuGlBjeFENh  
PM/eJm+YZggG7kFxZno8/y5YZm9YsQVDB62L7DE8H788wK3efzAYPpyJb27B  
8a98XJmhJBQMn58p2Zbg+T8pRO59pUQwyORrrn4i4vlX9Ak3u1wwmI3anfji  
IalT3864pJ4lhvpBFR4Djijzx26s6leDPdyLh1PwO+JZQ33FRedYOgFEZ9t  
fP/erC2jD0bB4ERzK7JzP56Pa+NTNayCYZmxV7yLjojS7OnfNDoEw+Q5Td1N  
WiJyJlxm5/fA8kKHrvljhj5hhzz/YOg8jFY4MK8dVV3yJw0GKxG9rlUalqov  
skrUzwqG492yU4F43X03iCB5JRiGj7Q89MDyed0u3NpfGwyt2XlJ7fj8LU70  
uajGYGiAbNZlrN/ngdvy0+3BcEogI0adHs/L8o96nz8PBjoeh78/sT3eU7qM  
Sm+DgRhbk1vPSETaZV8sKj8HQ8SdDyJh2H4BI9drbKPBUDFQFC/NTERkVH8n

U34HAz1NtfMI5jaf/VEuK8Fw0unqzAr2n98Hwf0alCFQMh9KdRXnI1yYa//E  
EgIm4lKiLZgZT7Z6ePGFwC3FXPrDmNfKuVSbRUNAvENiKwPvH92KZd+VCgFK  
ltX5h1h+n8X4vLZiC0wOsy+2YX3qm7R780ghMH2/iyoI63uJ8U7ZsGYIkBPq  
Xy9i++K8mUKFzoTA5/lhlTPYfkOBrwLtNiFwWGx/wh3sT+U4tLXXOQTq5Bsm  
GqmJiG/4+js9rxD4ZSYgfo2SiJbyvRJ+RIRAIMRTqMleIvo6/9rySHwIUF8M  
oR3fwfOUjuyxkLQQcPY4XRqD61H+3u3v+4pC4MfdkE9JqwQkG5SIItUUAqRr  
PeHUs7ieGd1bi5kLAWX72YEgXO9s64hv+v6FgGSuWsOH9wSkSRtZwbwdAo+u  
9+1TGyQgtidqZrfpQmHxaZ24Kq6XZAcRJBaYQ6EqviHtE+5vfyLoKJU5Q0Eq  
WjlkFve3tmPvG1+JhMJo4kduume4X19QzGCTCoVDpNuuS7i/pU2W0joohIJ9  
vpzt0kMC8j+5R7kGhcId84/9+7twv7/mwvTvZCiwOH0NUsf9D7af/0F6oVCW  
mc97qZ2ARCwlH6WZhIJVfGl/fh9zticVzRoHQomhd7Xr+P+uM646svtFApF  
AlJUNi0E9NPbWtPVE+snsZCu3ExA/X0PeeoDQkE8dWeV1IT7p4DAv/XwUCik  
uUPwbcTzf1zaS/W4UIjM0KvswfOCp6Jh1KesUBibrDHcuUdAygscYI5XQqHP  
qlLyH2Y+3Zg9zTcxBw08OYG/p638+XmnJhQyCt9G3Me8tFerXrsR21+yl8sH  
yx+yq0nNaw+FLNMWH0t8/rMHDHbDj0Ph99XjSnFYv1q2YHmh56EgY/BLYwzr  
fzHo8wH/N6EQp0JpkdRGQNGvT/y6/ykUvqJZJRfsDwdlcvr30PhvdoT5fvY  
X5q3evvTf+PzdzlbbbB/xRkvqATN4/jNZi4b4v7HFGVUb70aChspdxQv4/lj  
5Rcbv8ZuKBSrMz9XxvPNsMG3AnHqMHhaajAtjeN9W8g9aps1DOL21W/KfcTz  
Q67E3K+DYcC/3cyoMITjt7VkPyAUBpH1XNbkowRk6tb2rkUyDBgXemTDx7G/  
Bs9pXpUPg9dPtVgv/yGgQyrq91NRGFyRkQz3mcHvr8p94v6aYeCkRftucZ6A  
ppgHyizOhAEttdVsb8E9PpcPpOqWRiER46Zcq4QUNMfiyRR2zAorCLze7qG  
42V8cJXJNQz0So2dRDYJKLZrzGPDJwwSrbxrdLbx/CJaNfwzJAwOz3x9eHSX  
gE5d9NV/cQ7rZ3mU4xMZfh/vyjxpTA4Dhar1oxrkRMTiuS5beiEMysafR0fs

xfXgfVdFUkEYDDBLhUdQENGFuPeBQs3YH3/GrxdQ4XwVn1Lpex8Gym6bTnyY  
qYvu1tcPh0FZ0lrjPZy/M3tC+IvHw4Br/Ii7AOZBb+XC+JkwuHRBcD0ay2v9  
tLvPczkMdtNCvnfi80rVuqOMtsJAfqQmfxLrk3AnfU6ZlhyECiyyyDhrJhLf  
0xHCYVDLVikK639s7qvmMlc4nDXu/voP1wNWy/L7w/zhoDo6fXMY2/9D8sjV  
OzLh0HyltKAY+yf0K3jqG4dDTZleOyuuD9Ynqb4pWleDfbj0UQrsX6h/oc/r  
FA53xc/IbON5R4gr98k+r3ClqZK6shczXYqZ3GjgOLStePziwPFZWOCq/BIZ  
Dmrc6UlqSwT00foH550EcKDmO/w3dhG/93tuX6hOD4dZhodV7xdwPTjmTZaf  
Fw7Ds3951THLfot/IdsQDtzOs3NHcfyfpXUVfnwbDpHGFkExeF3tz3yuwpdw  
EBUbOyiH5XVoaV+4NBoOK519F9nweXIV5WnrV8Ph4sj0R2GsTx3VeqLVfDi0  
WB/97Yb1FXy1jH2wEg52qw7fPv/D53dXRXLvhEPpho6pGbY/L8kqYGR/BIRI  
djod38D2jTd4kwwRwPgjqe469leSOp170VcE0AfEBZNjf4aSD9g6ikUA5/v8  
39X4PlnF8ehOaEVAxr3Ke6U4nu++h2hp6UeA56+sJ89wvHVJA2qVZhHgE1UZ  
OY7vB9qJufj0iYBHDv+iaXH9bz37SfaFdwTsRLkXMOJ+KtV5VEo80AIgm2vx  
A06nfNGjQnMJEVDHF8Q0h/vp5SFFPv30COgPDLjxBvcTwvFcvrcCOjTvU6s  
xv2GakOVEFgeAbrSXAqquB/FWpYwvKulGmFUN5p2MK+1LdHK3o2A9Y3hugbc  
v6bCbuxZ6YyArIGJ5m3c34blTdZaX2L57xWS/++HA/8o5iOGIsBL7rUpD55P  
HjU1/zo+FQHH2GvtFzA3BLkOb69FwJebr0aKWYmocLH3eTxrJLy0GmL3YSOi  
SD/RVkrZSFAuWHyRg9l2Nv3mecNI4MyjebSDv1fzmsk94BcJ9tncnfVYnqzY  
lbTX5yIhISlB7zE+X2hSLzY3MxL2vuDPKMf9+Kr27cil/EiYXWv3/19f9sqd  
EOPLkXBxjOyuHmZat7vexOpIWEtgX+rF9sZ9cN9LbLiExYBZie94vlhR5ysh  
tEcCNUs1z2/sr5+8Bb0s/ZEWn3SopA/71yL7jC3LYCTsn5UzvYn9P7BN/Y/5  
ayTIWuf8y8Dxaf8aycc8FQlsT38q507D8Tole59pKRLs9KI/38H9+3brrD7T  
RiQAdxjfeI43t1DFBCN5FOyu8hewY867aH+OkTYKfIW+u+uC70dMwLtqBs4o

UKmJ+Sq074/nGc3P9GJREOuyUyq06wHnE6YsOs8omK16LsyE+3+/3Df1fdVR  
QHnwQ4QK5uvzT8qo+qNAlpWRdwRzZFXlOsVUFHjp350tx/XCyCnLZC9tNNgN  
TWXkY3liPMF394hFQ/eLuXU3fN7XHJLLjkc0tPAe9HLC+mRQ0HFtVkXDOtOE  
9jW8ftFW/57T82jg6221qfq/PrXla738Ew0C1t1SlVj+LebP32T3nYMZa13L  
W/j80m/u4CvC58DNPN2zEten1h57WiqtC5Aw1LHWWhvPIEe+tcI/XcyAWevjS  
CK5XzyMn5T8lnwOd5n/DvJgH30u8It06B++EwqxTcb6Np7WsM46fg97PYWbf  
8XyzcoIk9JmVbnw2GY7w4/XdwsS002ox805+VkQ95n2LvUaNDjFwZODIVDaW  
t//g1BW3gBiYOR0xfQifz6Szf5IrPgaczASf9WJmDZeUfZMTA9WhG3eCsb6c  
twxik8pj4KsRc/WB//1plutwlxgL5ENyf42w/UPUg+pf02NBivJRRCG2X1bW  
cUugMhaIp67sYcGcab/U5NcdC4fZ3O3D8P7xzASf9p+xkKJmYd+H5ZfZ00ST  
k8VBVNmtF7SY+wMN5yvo40B6J9VbHeuzklaso8cTBz9kFQ6EYf3PNItSXFKO  
g9WgodCf2P7gSZmiyNNxUC0WrE3AXMKDxM5axcGpjzQnzHG9emSo3UnyjIMz  
FXy+93A9m0g2MuCLjAP5AY1NEczSc66hv4vj4PL3zktP6/i9bBZVWns/Doyz  
bq/dxnwzPflo9vM4+Kn0fm0//r6/K/tjwJc4ULSV2m3CvLBUBGoyGQdvjqik  
3MLnsQrf/CO/HgdC7zJzxrA+oqqi0ij74qGswojyOo7HCeu6KA6aeGhKKjYJ  
xfY4ZrfRb7HHg7Eff60xtv/u6kvZx4rx0Prppp8tvm9mVL+ojkA8FCiN2lvh  
+7hF2P58USseRgu/7rfe+XNaWuKcu1k8mLS1Kdjg/JvwvtDNEBwPH3re6njg  
/L0QdasolioeTsh2JHvi+iib3ukxlhAPKKXroQf09/iK2Q0tuffQpdv60Q7X  
B+6fema2d+PheL7UXk5cb54uuIj0tcTDJdPc+g3MnrVnNo51xUPXL8cb73F9  
auOuK6N8FQ/rYxRbAbie2R3p8fd7Hw9WmUdkZPF7jKp5R03LUDxwhvkZzWI2  
Nqf/XTsVD/ppm90qnPh9G4wy4tbjoYeMnN4Lvwfncn2PmuxLgJrnQ9t03Pi9  
d7fsnTBbAki8/EEmwkNE6S8HwjYFEyBi0dumATOneqMEj2YCiAfvtzxkqliq  
7heNIdcE6O20P7iF9+t+YjTU8k2A2618T2IxLyyf79IPTYDyz+aGU/i8i8x7



xS1iEoCqJ4zuOGZFqehi+5QEELcOBqA9RvW+0flkZUABpfNdjI4cP308g00  
KEyAd68oWtKxPUYbYjUhJQlgt3hUbxflL3D+94+IsgTYdYgu9Mbcd9teP+F2  
Ap4PZb9L4fpelseTklKdAJuMsXWp2H/ez750pNclQLbG7dcf/39//TQSy29J  
gNxxvWhVncX035zljebMnAYqLN2jocHxEavecqOxPgAkfg57DuH5vKHcF1g4k  
AKLeZJHC8SyzUBht+piA+z3tXhkc/4l80QfdEwnw83EurSi+H218E4vPpxLA  
nKNWQAXX5/R710UG5hJg4KbnCyt8nyRfcxV+XEmA7Qlz4QZ8/8hsP7/8upEA  
xi59OdM43wdnLu79vpMAv27bz0tgDqWID/hNlQir5JnLL3F+axf3V0zTjgLh  
l72+KGZOkdSRefpEqOD4QZ2F7/dMizpxmTkRYplk1jZwfndJNNdY00Edxq3  
DT/Mjk4R98k0JcKdBYErATg/KOOXhGiEE2Fq9vDjXJw/LZrq/DOSidDm+yVu  
EOeX6/6Lh17LJ8JCroaLJGbWwXGuBpQITYbV+jdxPvYUybEXaCaCUKXhYRnM  
QvyfGK3NEuH6nvjdQpy/KXXhNiddEyHMj5bWELNm94ON2uREiH9J++oGZqrh  
nWnFW/h8LaaOMbzf1a18fKcpEfv3ukoPPq9nSfXbs2eJY045LPic6ycUM/Yh  
/X0ijGmspo5h/VNokgcMxhPBr0PMZT+2X/71h36ZmUTwEiCF3sA8cVGol3U5  
Eeiv1/UrY39p8vY9HN6bBB972p+44Pp5u8aj7TpLEgxtppgnYX9TK9Ddc+dP  
AmlmnfwLOD5ZNYPh6ST4GYU24gHrg+svCXPPkIshN9ajRfA8Sy76DBwQT8J  
iotyFFswC9GIfawTYJ/lqkP2HD85ZdapxuikoDj++ABOaTQ5q7vMVYvsCi  
uhj+/qU+Pc3niiS4TrM9IIHlmzz7wjzdkgSj/bf5mPD5w4pXuDW7k+Bl344q  
OdbP+Y6z0Pa7JAjS4/Xbg/WfOSwu1fQzCXyvCc3QY/uCC/8qeS0mQcsBiU0x  
bH9ibILeF/pk2GNc8en//kTBvD/r1cFkcF2/Hd2P/Zlys2DgsWQyaJ6qiWX7  
v58pHGJoQcmQ+31ZNgz7P/15pX71mWRQsHy2MInjkzX34E2ebzKYeq6+pMGc  
y/LaMCorGficT7VE4HheOvvPWHcgGT7dPatogvlqBZcZD30KulaLpGbh77X5  
X1SQ86RAY0Fi/34sf6kscv33kRRwYNxz4yrmy5xiOq+UU4DzuoypFtZHo/BL  
acOpFDhPUSdIgfWfYzo/V2SRAuaL5JYfMRddUIRzbikgxdct04XvN9D8yXUM

TYG22lfid7D9U0lFY1rJKbBmGjBbh/1zkUxLTuJiCvxJ4ipOx/5TiV5JYb6R  
AiSqCH597N+J1VufV+/h/bfl47Yx5wSZin17lAL7ZfbcKMTx+OnZ9KpiJAWE  
1fxpLuB4yTmyBARupYBlsfiyEo6nxiOamZMBqXC1qHe7BrPRQT13jolUMFJ9  
Y7hM8f//49SXPjqnwYkzUgyD+HyGdvrn+WNpMHH20d4ZzGKGJxO/WJ4HVvbe  
z+v4fM0/USqH3pwHBaVznyXw/o6aq//kGdNBblZE/v/5QNrv6Z0zBulwp1Z0  
E+H9ldK/XVxz0uG0Pg9rAraXZ4X2YMybdNi4ZJbAiPnl9ssoszMZwKdDo/UT  
+yeKMvul5MsMsEMMarZ43c0s7lG2aib8ulV8iQnLM64lqFhoyYSaxPHfD//X  
90+QxnH5C5BGMr/VifmFSOiP5OYLsGvuaXAC870GCmpL8SxI73k7113ldZ34  
liF+lww+hPatPPx/vtFKVq1ky4YbgqakTPy9gtExU4HMbBiVFbvlge1xFapj  
OEmZA+xNxmqvMFfeMF0008iB0xHUVx9hvtD9gscvNgdC1Ff0+2EO/K2q5dqe  
AzudLw6vYXmk+Ec6Rhs58H1Ftz0X834ukgFSzoWmTu2HsZjDLU2L50JywXda  
0aUE81iR18+ye7kQqvW3owitzPSvpOv9MLpxsKnd6hTmmgNmxUigPqFTkTjX/  
P39lzm0dds2DMh9mnSLMkwn9RZdv5UGpwe+7Cf/fp4Mo7MtoHjQa/yn+/7zc  
+/fM2Ljzwe3cEct8zK9eSjCdtsmHYQHhneYaUarXkSX5sMsZWXH2P/1SGZs  
K3EoH+S5tLynMGukcktmcF6EcXlfxR+Y42Jnb5iZXoRZZ9X1N5g7wro4+Hlu  
Ap1uwP5HmEd/F3n+fH0Rjp0Y+PgAM4VfwlPrDAVwc0o14ynmHu+fBsI6BRCZ  
sUb2v33n440nalIKQFjX/Ob/8uo+xi9RPC4Aie8b5L2YB4/U75zdLACWw/3j  
/8/fl2sTv2qUC6FQUZ8qDPN0N8+r9YhCSF/OpDXHXKgws0bXXAjB/ifXtDGr  
VrULHFwohJPqGRIamAXCLEkZpIvg98uRl4aYqbXWVneDimBGdEjs/3r8H2y+  
rLA=  
"]}]},

{RGBColor[0.880722, 0.611041, 0.142051], AbsoluteThickness[1.6], Opacity[1.],  
LineBox[CompressedData["

1:eJwV03k41AsXB3BXpEmGJEy2lEQijlkGzVcNt/etVLY2pPJDlmEsMz+SNcZS  
kTKT0nCRkrLeYiYtbkq3FK0iikkppUko0TvvH+c5z+ev8z3PeY7+njBXQIZG  
RiZLWv/v9t86vnKUZZjof5L1c9Y+Zm92f/Vnbg9Ts8CNub3WCQl3dClvcAeZ  
AwWk5eJUD/D93jp/1Rxjnh3Plps4I22t7buh7hTzBMtHuu2B+1BVm1L9bwg  
WSTvqhOd6iBQFRFh3ac5E80ThcEl/YF4TNe5VtlCwePn7E+NomCMj7Sw4rhK  
qG+6oasxh43D28X9pbkqEP+lFfh1QTgKxdRyxSBVFAmPz6qfy0ENzS8kwlen  
yU5qu0SDHNyMEa/o1FSHYdN70+yaCDztpH5jDmtgm56qlb5vJN7b+l0ua6Fh  
/EGoTslkJH7ki2OUCrUQ7xk6bJAWBcWfVlcorg7cpjlnB/6IhvYOP5kXG/XQ  
ONEwc0tYNDR6uvuKchdiZty+erWH0Vh4mL/WPV4flqPVzepGXBg70M8oBC1C  
zNXvdknRXNAHu2de8VgMu4rxUm8JF3an+YFsRwPodTRnnxngrWRflffdAnq  
5lly8mY8bjzqNnmqaYjdbxiWvj48eF7kH06XW4rh/5gf35LBwy5v+he74aXI  
Pfv5RlgVD4FKPZu/vDBckq/3otUPeeBc5dcWtxhjweUGW6svPMSG0tU865ZB  
yaj9YhOFRipOTzSl0ARm6tN0pj6JQ/f5HY2Zy+FMdXeZYUUi7wDdNpxritCh  
G072dSREpj0nF+8xA3V36u+D20iU9fB/Pdu4AteilLqa/Ek8d6atuKVtjvl3  
VOOclkl0i4Z6RbnmCFAJLgBk3g1djOHnGUBF0un9118Ev0u+Y6u8RZIsrlj  
55BD4mMZe8Rk1AI9AllOupDEOPTaEvkgOmxCc8Rdp0mMeNLce3vpiOo+Q9IU  
QmK8ckh07LEsl/jDxNRZEr9mNI/KvbcShGiCPlBQmZXvn+IoyUOrHycubOK  
hFw9W8053hKTTk9jV9SSoCiz7uiZroJuCc067W8S1ABazI/iVVB1KFsXepmE  
6vUh48eaVtC/fqF5uJ6EukZz14UjVnAbvBalJSAhFZaflSZnjf9SrCfGpF7Y  
wrb3jbWGjVVvb5aEhIEea9B22BpVAcz2PqmNeDTRPH8bFLhvKvgttWnbkMvg  
CxsoP+vb8Ulq+tLm37e32CLH8h3vvNRWCfnVRS22UGn7fMdRakYHe3esAwP3  
CJXCS9J5zBUSVfc6BmljRU8oUrP4tJumxna48Xj5c8cGEut6hyIVCu3Q9zq3  
wVeaf4N1s0Gfmj3qw1+a75PutyU7/6kk0x4KjtQa70skdjBZ1myuAzZodNrP

qyNhxl8mshhzwIGR5CeNNSRk21Tkv0evxrnfWje3VpOo80l5tD+aCcXKhu2B  
F0lMr7arZ0mAe3V0F5r0Hpt9nri6itegO+5dZkw+idGCmZmh9c7wMqiu6owj  
YbcgeKKkzgvJbvrN89ZK9xUdmcp54AmF9a/7eM95SLuS/eyljg80GqfcE3N4  
+Phx06y38nvx6/16CU00h5+Oj4a0xf6I8M7t6ijkl0j07XkShCiolnPk5Zc  
rPomTudUsFHRwTOduh8NYk7GxyYTDtReOZfmS/83/OXEAMc4EgzWgI2SYjTC  
ni6Zw5KPRmGd3/TzyijEtdn3izu4uBny1nXKIwr/pgsFzx6ScHHfcGzteCRm  
B1SFzD8fi/YD+06yiyKRJaeoNVkeB0WlipQfayOx4MzmmhINF8Zg14Pa9+2ME  
XC4Zy51gJkk7Az6r8iNQNd5q2WSTBPrBTfEr10Qgs/UBb3JJMupjCdnQEQ7k  
k0YMKUtTILm6jZJ6mgMFa8WawMUH4R8eU1q1noOUhOSNndRUPK8X3a6U4aDw  
rJanDjUNbnD3bq00x6o98zgRv9Jw32vkQEZAOfx1ZQJo7/hYWxSp82VhOJQl  
1H+PvUnHzm6anndFGJwH9jvotWfgQZeuYK9+GHTGZuvGt2eCskSDmniEjf3y  
2Z1mrVloUet3G5Rhw+0s5+zw5U0wKZYNNU8IxT0jbl/qpcOwUAtynxgNwTX7  
TtPlJueQ500VweCGwNrVwsPgUDaYS/i26r+Cca7EY5THysGMNUtLemKCEfHe  
8U9/SQ7IuoF/EmWDMUeLuXk14yh0FWNb/VKC8EYY/FpUcxTNJN+onRqE+DzV  
PecMcyHXWQeuaB8+JN8VnjqTi6sJs8uuGO7DUXGNp4b2MXSOhzmNNQSC8qr8  
XlzBMajQ9Px0WYHSf9E2y1pwHGwlo20JjwPQyLtGW5RzHJVau5nrQwIgt41z  
pVg5D0q55So7p/2RkeT2riltD+JFTo0Z+f54ZFI97T2Zhw/niXFfg398uqVz  
/0eMAMH2L2Lb2gk4lksMdIcFSNX+cullh0BDocIF0xEBhGNJOxjhBMwF7isd  
RgXos3C0F7AJ6KYMOXpNCDDQz/B1CSbw02vRrpMyQuhNPDW+4UegViUzX32u  
EDsDE5vKtxIwILdTelCbDrq9vW4A4FT7LI8XUshFlDP1o3aEVALvmmbWQmx  
TtKR584gION62GQjQ4jkkttiNWsCPSZN67LWCOGqLEgQmBMQ9BqIKLgJcehC  
m0zRYgJKz6Jna3glUWVw//ofiwgcbP3nqOFWIdavTBTtXUggQuxV5LRTiFrT  
KclSHQlux3KupuWvonS9UniNOoFbGT2sY4QQIyYRy9XmE7BPXNZaHCAE6xk5

izePwLLQ5q6mYCEuF+/Wc1Ah8NfeuXsehgohebh6RxGVgOYOnw+vwoRle1v3

9wwlAjmbK8KH0dJ8u6+ZBSgSUPhzYvx3pBAObTvv3KUQ+B9W7eZe

"}},

{RGBColor[0.560181, 0.691569, 0.194885], AbsoluteThickness[1.6], Opacity[1.],  
LineBox[CompressedData["

1:eJwVz3081AcAx/Gr3IScoTDc3Sp00ofZxYjuK9tTFvVKUajT7HqgpyOnZMrT

nXPKPf5+hY5RSXnlofTqtjQ1M2UNDRk3KiKW9WC5PNTaH5/X++/PwugDmwSz

KRRK1If+1/9110uhBYVHocwxBh9GtCXN1j1t0jP846UoiUfKOEEd+5WeUCF6

zUUppC01v9PAk3w3sPql3RteOj/yJpf/gPf7gO/mXNEMl4jGUjmK+3mymqYq

69jZsFWWGJU8H+ZVxsf7PLL7CA8XhZpuCH/Je+BFr7/cZIIocdLjX9re8CZe

NfFTROYwbbTOS+2Y5p3Yphs8q/wYjMeFssbyWSjS0crNYq3QtIvlt4FjxZ0j

Oo9uOxvEi+7ndxDzYDZJCzgnosPZ2Xe5c4ENHCO+o/QEM3E6aOr6t212sNX3

PipWfoqgrVHCvVY0cA3wOmccuwj627e61lcxETzTy+6wCWGLck5QXuwEzfdE

vgdFHNhMrIKPE+7QcvT5i6PdIWutVnf44Hzesl0Z7AHRuvN5/vIPdGrHevT

Kj1xpett4bbOzzD2LqiUGuuFb6wVA4SAC6tbY64P7LyR/cWpIUGOLyJ4fj/9

ogBEFsYt5P8diOX2cYbSKyGYn9e6YPyjfzDWnpyR3w9Drs5zLp+zA+lbeZ1/

0XdaUvn1mbLJGlyMbJg7QI2B5AhHM+m5B5OB7W00up1o8V25Z51hH3Jse7NK

b8Siji733xUSIZa91mULL+2HyEsV1jyZAME86UgDW4gLQYLng74iHPzLMCx0

TYB+79HkHO1hHOHwmsenJqIxeRU3vDUZKb/7D+q6RAh9Jn12+3kKmrNjorPt

MA7pD98bcT8G012VexdcTMZORkrJu6LjkBmZOUyVp+DJtN/7cl0a7M9tPJZZ

nArrpC6xU3M6QmpdjU75HUdyzIXooYYMVE60cBu+SENYtVO74W4mclruJ005

p20BxjA9qz4L1LRXLiZLMqA9yrxacVsMYx+z6t2LM2E9pbWf0kmQcSw9uJuW

BXGUZWGyNhtFZQ5hdJoYw5WpPQ8VUiyLthbGT4shaKeeNRHmYBODsuuTpxLc

FVd8uXctDBZ1tGbVk2xcZB9qj+bkYvXw0QBmqxS3Yph7Tr7PBf2NKSO1NQeX

f/nNPKTvBI5S87rdW2Twn1/SPX7tjELLhGUvruWiYOB8ojolD/dYokdZtSeQ  
amZZkbdEjnr/bo5b6UnkEAw/22w5fDZ9tsUpNw+11zd00QfluFC6ZTyJL0ex  
hDbz1VoF4ocC1+ySk+P1YrdBbqkC8xx4G1f4KdBqbexmZKTEEzLusbZagZRR  
l6L7kUqkaqyiL7gocX2qbv83NUo8S79LFpxTguV2Ric3V0Ghqw6zdVRBZvE0  
kf2tCib95fdSClVQ+7GZrnUq8CW07jJ7NZp8arePWajxY1L9J4vkaoxe9GiX  
7lDDaKvwRomFBkuGE1iratSQpoU+vSTWQFH7chntvRrt7Kp3UVMa9NjHjJuv  
02C0kf7b2yMEBE3XNvxDahBYXufEeEFgiHFxuqJfg+tFhxWcVwSeNGwtSH2k  
gSex+fOAcQLVETvV9Y81YGSMBUYaCPRPUANWDGowGbn063wKCXGZbLf/iAY1  
H+ectrEkkWgdvpQ7roHT4W00Cy8SnD+ZOy3nEijYf17D4JIwMLlxISYErASv  
Hd29SZRVzNkqMyVA2XSCHexHosupd9jInlCe3bBWtpLE7vCyoTeWBIg+VoZx  
Klme6fXbOx0ImHcmtpulfG2f6LXkk4gs+UnhUs4iSxuyupgBoF4XWTxqu0k  
zK7atd35lECISn4zi4bErZ6OnyudCTRK9XyVgETg7LsSERcC/seXtpTsligq  
mO/uzCKwdN/PfzbEkaDbzHjnLyXwQ4xldNs+EsX5W8g/2ATsInY86z/w4cdN  
20fjEJBvvHTwhZBEVeVDi3XuBIZXGCbeJ5AloRqzMjwl/Afisa3r

"]]]]},

AspectRatio->0.6180339887498948,

Axes->{True, True},

AxesLabel->{None, None},

AxesOrigin->{0, 0},

DisplayFunction->Identity,

Frame->{{False, False}, {False, False}},

FrameLabel->{{None, None}, {None, None}},

FrameTicks->{{Automatic, Automatic}, {Automatic, Automatic}},

```

GridLines->{None, None},

GridLinesStyle->Directive[GrayLevel[0.5, 0.4]],

Method->{},

PlotRange->{{0, 1650.0125}, {0, 1637.135456}},

PlotRangeClipping->True,

PlotRangePadding->{{Scaled[0.02], Scaled[0.02]}, {Scaled[0.02], Scaled[0.05]}},

Ticks->{Automatic, Automatic}) \) \(\(*

GraphicsBox[{{},

{RGBColor[0.368417, 0.506779, 0.709798], PointSize[0.6], AbsoluteThickness[1.6],
EdgeForm[{GrayLevel[0], Opacity[0.3]}]},

{RGBColor[0.368417, 0.506779, 0.709798], PointSize[0.6], AbsoluteThickness[1.6],
EdgeForm[{GrayLevel[0], Opacity[0.3]}]}, PointBox[NCache[{Scaled[{Rational[1, 2],
Rational[1, 2]}]}, {Scaled[{0.5, 0.5}]}]}]}},

AspectRatio->Full,

BaselinePosition->(Scaled[0.1] -> Baseline),

ImagePadding->Automatic,

ImageSize->{10, 10},

PlotRangePadding->None])      blood

\)\(\(*

GraphicsBox[{{},

{RGBColor[0.880722, 0.611041, 0.142051], PointSize[0.6], AbsoluteThickness[1.6],
EdgeForm[{GrayLevel[0], Opacity[0.3]}]},

{RGBColor[0.880722, 0.611041, 0.142051], PointSize[0.6], AbsoluteThickness[1.6],
EdgeForm[{GrayLevel[0], Opacity[0.3]}]}, PointBox[NCache[{Scaled[{Rational[1, 2],
Rational[1, 2]}]}, {Scaled[{0.5, 0.5}]}]}]}},

AspectRatio->Full,

```

BaselinePosition->(Scaled[0.1] -> Baseline),

ImagePadding->Automatic,

ImageSize->{10, 10},

PlotRangePadding->None]\)      liver

\!\(\\*

GraphicsBox[{{},

{RGBColor[0.560181, 0.691569, 0.194885], PointSize[0.6], AbsoluteThickness[1.6],  
EdgeForm[{GrayLevel[0], Opacity[0.3]}]},

{RGBColor[0.560181, 0.691569, 0.194885], PointSize[0.6], AbsoluteThickness[1.6],  
EdgeForm[{GrayLevel[0], Opacity[0.3]}], PointBox[NCache[{Scaled[{Rational[1, 2],  
Rational[1, 2]}]}, {Scaled[{0.5, 0.5}]}]}]}},

AspectRatio->Full,

BaselinePosition->(Scaled[0.1] -> Baseline),

ImagePadding->Automatic,

ImageSize->{10, 10},

PlotRangePadding->None]\)      gi

(\*-----  
-----  
-----next mouse\*)





{0.3575112797365835, 0.08143316377978886}, {0.4516394623155443, -0.007347854733426912}, {0.5394859823491253, -0.08816932746972758}, {0.6346872009943513, -0.13787329990112937}, {0.7281522108132057, -0.12816574147938434}, {0.8153355580866803, -0.07001063326902106}, {0.9098736039718, 0.02121659675083076}, {0.9999999090909091, 0.10024804094746914}}},

{GrayLevel[0.55], AbsoluteThickness[1.5], Opacity[1.], LineBox[{{9.09090909090909\*^-8, 9.090909090880112\*^-8}, {0.0874367476365131, 0.08090369567458766}, {0.18222810297558026, 0.12746559200130417}, {0.27073779576926765, 0.1116266937044405}, {0.3575112797365835, 0.046963725126600256}, {0.4516394623155443, -0.04509050859182233}, {0.5394859823491253, -0.11115559892361665}, {0.6346872009943513, -0.12642564594664163}, {0.7281522108132057, -0.07740196037964171}, {0.8153355580866803, 0.004179083230780074}, {0.9098736039718, 0.08937493944143977}, {0.9999999090909091, 0.12834702174618903}}}],

{GrayLevel[0.55], AbsoluteThickness[1.5], Opacity[1.], LineBox[{{9.09090909090909\*^-8, 9.090909090875369\*^-8}, {0.0874367476365131, 0.07984396759533968}, {0.18222810297558026, 0.11939549826670079}, {0.27073779576926765, 0.09184904274707059}, {0.3575112797365835, 0.017913117173780694}, {0.4516394623155443, -0.07109962300031061}, {0.5394859823491253, -0.11717052830989395}, {0.6346872009943513, -0.09879571259704382}, {0.7281522108132057, -0.022693471356141894}, {0.8153355580866803, 0.06128703302641453}, {0.9098736039718, 0.11605625481609519}, {0.9999999090909091, 0.10415981267620744}}}],

{GrayLevel[0.55], AbsoluteThickness[1.5], Opacity[1.], LineBox[{{9.09090909090909\*^-8, 9.090909090870287\*^-8}, {0.0874367476365131, 0.07879243663407876}, {0.18222810297558026, 0.1116081822210312}, {0.27073779576926765, 0.07372482040530459}, {0.3575112797365835, -0.006267252216927747}, {0.4516394623155443, -0.08743897872291118}, {0.5394859823491253, -0.11109134853087661}, {0.6346872009943513, -0.06371549528296311}, {0.7281522108132057, 0.02544576624054603}, {0.8153355580866803, 0.09464282937855747}, {0.9098736039718, 0.10731931496853601}, {0.9999999090909091, 0.0516787429232188}}}],

{GrayLevel[0.55], AbsoluteThickness[1.5], Opacity[1.], LineBox[{{9.09090909090909\*^-8, 9.090909090865543\*^-8}, {0.0874367476365131, 0.07774905743802465}, {0.18222810297558026, 0.10409673959866513}, {0.27073779576926765, 0.05716133039337165}, {0.3575112797365835, -0.026084496726167965}, {0.4516394623155443, -0.09591154799603378}, {0.5394859823491253, -0.09685594593277226},

{0.6346872009943513, -0.02730376120671303}, {0.7281522108132057, 0.061646715198529656}, {0.8153355580866803, 0.1046634148537508}, {0.9098736039718, 0.07509702498429204}, {0.9999999090909091, -0.006536873471333553}}}],

{GrayLevel[0.55], AbsoluteThickness[1.5], Opacity[1.], LineBox[{{9.09090909090909\*^-8, 9.0909090908608\*^-8}, {0.0874367476365131, 0.07671378556951527}, {0.18222810297558026, 0.09685439581479163}, {0.27073779576926765, 0.042069810325321415}, {0.3575112797365835, -0.042006785469922474}, {0.4516394623155443, -0.09808544986431629}, {0.5394859823491253, -0.07760167026270944}, {0.6346872009943513, 0.0063643674428021085}, {0.7281522108132057, 0.08405712128907425}, {0.8153355580866803, 0.09555213349985489}, {0.9098736039718, 0.03202960165577907}, {0.9999999090909091, -0.054402034659985464}}}],

AspectRatio->1,

Axes->{False, False},

AxesLabel->{None, None},

AxesOrigin->{0, 0},

Background->GrayLevel[0.93],

BaseStyle->{FontFamily -> "Arial"},

DisplayFunction->Identity,

Frame->{{True, True}, {True, True}},

FrameLabel->{{None, None}, {None, None}},

FrameStyle->Directive[Thickness[Tiny], GrayLevel[0.7]],

FrameTicks->{{None, None}, {None, None}},

GridLines->{None, None},

GridLinesStyle->Directive[GrayLevel[0.5, 0.4]],

ImageSize->{Automatic, 28.4375},

LabelStyle->{FontFamily -> "Arial"},

```

Method->{"ScalingFunctions" -> None},
PlotRange->{All, All},
PlotRangeClipping->True,
PlotRangePadding->{Automatic, Automatic},
Ticks->{Automatic, Automatic}] \) Expression: {Bl,Li,G}
Parameters: {k1,k2,k3,k4,k5,k6}

```

]

```

Manipulate[Show[ListPlot[vn[[1]],PlotRange->Full,PlotLegends-
>{"blood","liver","gi"}],Plot[Through[model[k1,k2,k3,k4,k5,k6][t]],{t,0,1500},PlotRa
nge->Full,PlotLegends-
>{"Blood","Liver","Gi"}]],{k1,0.001`0.2`},{k2,0.0001`0.1`},{k3,1.`*^-
6,0.01`},{k4,0.001`0.2`},{k5,0.0001`0.01`},{k6,0.0001,0.01}]

```

```

Manipulate[Show[ListPlot[vn[[1]], PlotRange -> Full,
PlotLegends -> {"blood", "liver", "gi"}],
Plot[Through[model[k1, k2, k3, k4, k5, k6][t]], {t, 0, 1500},
PlotRange -> Full, PlotLegends -> {"Blood", "Liver", "Gi"}]],
{k1, 0.001, 0.2}, {k2, 0.0001, 0.1}, {k3, 1.*^-6, 0.01}, {k4, 0.001, 0.2},
{k5, 0.0001, 0.01}, {k6, 0.0001, 0.01}]

```

```
Clear[newmodel]
```

```
newmodel[k1_,k2_,k3_,k4_,k5_,k6_][i_,t_]:=Through[model[k1,k2,k3,k4,k5,k6][t],List
][[i]]/;And@@NumericQ/@{k1,k2,k3,k4,k5,k6,i,t};
```

```
fit2=NonlinearModelFit[vn[[2]],{newmodel[k1,k2,k3,k4,k5,k6][i,t],{k1>=0},{k2>0},{
k3>=0},{k4>=0},{k5>=0},{k6>=0}},{k1,0.008`},{k2,0.0001`},{k3,0.0014`},{k4,0.001`
},{k5,0.008`},{k6,0.0001}},{i,t}]
```

NonlinearModelFit::eit: The algorithm does not converge to the tolerance of  $4.806217383937354 \times 10^{-6}$  in 500 iterations. The best estimated solution, with feasibility residual, KKT residual, or complementary residual of  $\{1.06562 \times 10^{-12}, 0.0000129491, 2.8655 \times 10^{-13}\}$ , is returned. >>

```
FittedModel[newmodel[0.010714,5.86338*10^-13,<<22>>,<<23>>,0.0197596,5.86338*10^-13][i,t]]
```

```
{fit2["AdjustedRSquared"],fit2["AIC"]}
```

FittedModel::constr: The property values {AIC} assume an unconstrained model. The results for these properties may not be valid, particularly if the fitted parameters are near a constraint boundary. >>

```
{0.945347,892.522}
```

```
fit2["ParameterTable"]
```

FittedModel::constr: The property values {ParameterTable} assume an unconstrained model. The results for these properties may not be valid, particularly if the fitted parameters are near a constraint boundary. >>

|    | Estimate                  | Standard Error | t-Statistic                    | P-Value                  |
|----|---------------------------|----------------|--------------------------------|--------------------------|
| k1 | 0.010714                  | 0.00182896     | 5.85797                        | $1.62808 \times 10^{-7}$ |
| k2 | $5.86338 \times 10^{-13}$ | 0.000375722    | $1.56056 \times 10^{-9}$       | 1                        |
| k3 | 0.000574579               | 0.0000925975   | 6.20512                        | $4.07956 \times 10^{-8}$ |
| k4 | 0.0000634359              | 0.000179549    | 0.353306                       | 0.724985                 |
| k5 | 0.0197596                 | 0.00355785     | $5.55385.37844 \times 10^{-7}$ |                          |
| k6 | $5.86338 \times 10^{-13}$ | 0.000216822    | $2.70424 \times 10^{-9}$       | 1                        |

```
Show[ListPlot[vn[[1]],PlotRange->Full,PlotLegends->{"blood","liver","gi"}],Plot[{fit2[1,t],fit2[2,t],fit2[3,t]},{t,0,1501},PlotRange->Full]
```

```
]
```

\\(\\*

GraphicsBox[{{}, {}],

{RGBColor[0.368417, 0.506779, 0.709798], PointSize[0.016666666666666666`], AbsoluteThickness[1.6], PointBox[CompressedData["

1:e]xTTMoPSmViYGCQAGIQDQEqDhr5ZjxXBSwclHw7h00OrBddLCuhfE+H1dNK

phyWLI TWGwIdfpzv/Jy2PhnKD304tOyVXGRjDJQf7bBMwb2HsTocwndlCdj6

60zV2qtBEP6BJIcHx1VSm/kDoPKpDjqs3Qn5L72h8ukOEY/Pp+yd4g6Vz3JI

4M3czlXhApXPcXg36V/9jGNOUPl8h3yt4vyreY4Q/oMCh6Z53zQZW+0gflUi

h9v9unpMdbYQ/oIsh69pYjPTl0L9m1Dh4LCDq9q22hSqvsahaNtK/zUcxlDz

6h2Cp2taZrYaQfgXGh0uhxbobVE0hPAL2h1+S4s33fqtDeFnTHDQ05v9pVIZ

HcKXmOpgOZkxWX2XsgP/HONFV47PdFi3Q2/H4XkKDgCdpnCJ

"]}],

{RGBColor[0.880722, 0.611041, 0.142051], PointSize[0.016666666666666666`], AbsoluteThickness[1.6], PointBox[CompressedData["

1:e]xTTMoPSmViYGCQAGIQDQEqDncfb1+3k1XBACk3c1j483tJgE8clO/p0L9H

Ij9gagqE3xDoYDlNRibwej6UH+ZQq32iNXjMZQf7eCpO8Wn72AphO+Q4MCx

5+6dzjdlEP6BJIdNR3ba6Mwuh8qnOpjtXqLgp1wBlU93mDxVtLKjA8p3yHI4

9zDqraJ9JVQ+x+HYWovut1ugfld8h2KNF7NvilVB+A8KHAym/9zsAuMrFDkl

butLkNSH8heUODDnfPtm+x+qP6HCib2zZemEg1C+Qo2DZPk9xYR6KP9BvcO1

CpcHyexQ/oVGB/vv+lEf3aHuK2h38LyplCnOBvVfxgSHJV6WLMKziyB8iakO

Jj/C6uWl8h345xgvunJ8poNznnbSX7dMBwBYanPE

"]}],

{RGBColor[0.560181, 0.691569, 0.194885], PointSize[0.016666666666666666`], AbsoluteThickness[1.6], PointBox[CompressedData["

1:e]xTTMoPSmViYGCQAGIQDQEqDn8v/f4m8PWOPYRv53DkSFHvcW9bBwjf0+F+

1xGWrczREH5DoIOBAMuJgMUpUH6Yw+dV57Ic7T0h/GgHu+trQ9im5UL4Dgk0  
a0R830Zfy4fwDyQ5iPyodGqdVgiVT3Vo879/XXdtEVQ+3cFlbty5i2wlUPks  
B1uD2yu/eEH5B3IcSn8qiE7YAJPpdxDVTxB25iyF8B8UOBilHw9/EwrlKxQ5  
bCyMKBU0K4PwF5Q4SGsyZP/6XQHhJ1Q4FGjUbOu7XwtVX+Nw+Z710aMXG6Hm  
1Ts0ru+VfXmkBcK/00igK/B5dsXqdgI/oN2h5tOGAG6mCRB+XgSH6oPLLSN5  
p0H4ElMdtolM+NbPMseBf47xoivHZzpcv3Px/6lZCwADV147g==

"[]}, {}, {}, {}, {}

{RGBColor[0.368417, 0.506779, 0.709798], AbsoluteThickness[1.6], Opacity[1.],  
LineBox[CompressedData["

1:eJwUV3c81e8Xt/coFSKSJIQk6xrP59h7ZoXsvbL33uty77V9rcoqhUoikUS2  
UCmSVLIqWS1Rv/v767706zznP0/3eb/P636eE86XzdyoKCgo5GkpKP7/q7z9  
ajOQnQJbxLjcm+Xz4F3ep5YvYW+xF60IPAKDuRA/yBd8M+wrpIhVf33cJhee  
LeLMc8L2sW72KxytSXj4uTWgERPgCiWnDDMrPmUD8y6bSkgyHxQVYYU/v2bA  
MRtXijeGx+Fb/5uphYIM4Ho7976aJAAGW44RDCoZIKoiXUvvLQj3U1eYKYnp  
YLg/d+YltzAc407XPa6dBoWx0riAMAnwDtDQjVlJhkqJt2UnnSXhyHcjc6sr  
yVD3Nn1v2vAszG5fLZeyTYa5yvV3lSQp8FTIn302mQTrf9Wv0XpLg1PFhSWH  
4UTgeLQu+pxbDoYZpLvfmQDJ1ff7M1cOWhRlqBRsokH3sul2Wk08lAx0Zgo  
tRYHQsc1vul25OFknfep2xxIBdf2lI9gAPB3SZ+eu8YsME05P3DVABN/MzQ  
d40EyXSxynM/VIDGmnVvlzISqJ4doP0eiqDQTPHM6SsR0Gj/dio6FIM97yzu  
+Y/h8Bcp3dd4AMCTsliJR4XBinOTt/Auglv1wC2hk2EwlXaCn0FRFZo9ru/5  
jYVC/Th96kiHKuj0pzbMnwoFE/sXZmYdanCrjMbx9qdgUEzSppP5rQZO5YPM  
9SXBIFT3oOMITh10eIqMPTUIht9fqwVm2tWhM/ckZ3B7EFyN9Vt3aNeA7ApF  
oKslhJ1yuiy/+1oQ9X7x2LrkZZjviVQx/qkFe7b79FJt/jC4+GVDSl4bbDur

rDUxf6gQf26106YNXdu1++OWfqD1sOpUdJsOXH5951h1mQ9ILXDM2P3QATn6  
I7vdZ32AhyYtB8npwoeUg8zRT73hm77vNmWbLtA3iG7d+eUFJW8UHMfc0wO1  
mndScZc9IelfY4j3dz2YetL6/f0BT/A9eVzEQFYffMve0bbe9QBVH9o89nv6  
QDOPvc7ed4e13Um7olYDqJs9Uhf+xQ2UeHx+XbtrBNRCvX1zp1yg70Pohu43  
I8jkSM4vXXAGg8aElW9ixnBH4d5x03JnsFcueq101RjSfuzZXOV0BtVmxzkv  
HRMw+PPypTenE7hOZj+klDeF5LjEs4Hx9tAgS2x/YW4KJp6lewIH7eFraVFr  
fZApGpnlWDvUXIIw5ys3DZtMwXJhBgU+s4P07bby0lNmcKSLJ9NK3hZuHPkQ  
c+7wBRg41C1Qq2sN65HLETTSF0CJRi9heNMKzs9/CXllfAEqh16tS/xnBQ/r  
fvrGZl+A0zFeTBWbljAmz3ppiMoc0ucZ3lXetICNiwoqTpvmUJO6wFVgdQFk  
ulVwMuwWYKeU+Kji4AWIFFSXPZewAPu6Ff6aUTOg+mwoccvTApJWcplLnc3g  
UIwL3+93FnDB0KbpqZopyFXm7hPGLeFSLe5TxbgRNF7dkhn/bAnda42UNk5G  
IFBv6cvMaAU5J/z/lX43BOYW/jep6law6KXLSxA0hIXHTe1R7VaQcLQooRuv  
D1mfxoNdr1rDo3vDfFM10vBvVbrxyiNreMBmQedjqAMh60Uf5uesYTvQKxn3  
UxscftqbXuS6CC/Z+6zdbRBhvGbpFHORaha9F/JY9KCeXH2NfkWg/C4nDHS  
2KYOF84FnwjNtwGhDwq+PQHqMCj7yvpOiw28belBY2fU4S6qGhD/bAPCr3gH  
HteoQYbj2doTjrawV2BX2HZFFaRDjB2Z9ezgxsk8/oNZGNRH3C3W8bCDvHK5  
IFkeDI7Fcj1LTbEDicv6R5caEdCnvVOheGQH+5yxItPPVWCu+DLv9/OXwHkn  
r8tZVhnSOvOm5/nsleQTJeUTRRx8+xMeXaRiD3sNQVjPjAJYKzsKGF2yhxLO  
y6PSUQog1iXl3VVuD2z2nXlOj+ThWffk/n+8DhD35OwxPRs5UPjXcfWCkgNw  
dMcesqKRg6vYVW1mWwc4g++Lb2qWhZCeIGJUmQPYCQFRlEkWWN5nkm6yOIJq  
EX3u8Nh5AMq/rhnHHGEoyuRkbeJ5CD0RJO8q7gi9CekHa+Tow7yTzRyvgSPs  
Jf2y+HtNGm5/EBPOznaEfRctqdvZ58BycaTDi8kj/LBtcXqus5BFAzmaPE5g  
/pA6L6ZKEh4JtdqfEHOCVYbSzS5RSRBxK6ee0XWC0gkmpwx1CfjzyddQJ9MJ



XNY1wqOzz4AU3fvjQqVOYIMWm4gnzoCrsMXWvwYn4Dr7MBrrEINxd5Xi+4NO  
UDbSFqz7VRSq1nfCzM4Q+39rzm+HiLwgj7pLhW3M1Q80dUsYhQBRpEfqfOn  
nWHogNeUyK3TEOQ5L1ak7QwPLg8FBv8SBs3VphDadGeg1/q9w1x1CtbWjBkW  
aV3gMk4G+3T6JGjtrH5uOewChy0Xwo9/FISr+8nPYk+6QHmDdbpJlSDYHmgv  
4lJ1ga2w/FsZPIIwKitwSj/GBVgYXvV/5z0BTQkbqne2XGBpljOYmsAPTFIZ  
p+IpXeG213CKjiA/uOcLMRoccAVXJ6qnXG18cLzOeuKThCuwUAoLYh+OAWGk  
x/6olytkKOgaHzXghSBOYnTCO1foo+WbjnbihvHjZxwM113hpZD30jYjN4ij  
9qvx7LtCO9/K8bq7XPBR6TdjK48bVFoUVNUxcYG5k1PjsoUbPF170nLt6RGQ  
u3nuntGoG1w086VICT4EpHsjjbxv3IByVipZXuIqrHe7xaysukGCYO2bSysc  
UD9Zqp5E7w525xn08U4cwP2TcuqemjsYs9R4cjochF3VqfVjHe5wVFywc5We  
HUy8JBIPD7ID4GsNTchjgzc1slzM+5wg+fdlA83G1x4p2at+dsdaAoMLgpJ  
scLNmLuP/XAeoBxW98gxBmoatjnwnU94IeD7GollzNYj/j8SLzoASyx8dEx  
1UxAyyN0pijSA9TERKb+TDGC/f2Cgu4OD7hXMdJnp8cArfMbTYNDHhDXzX1w  
5TM9MNEZDk3NeAAAt9/7+h1x6uG90+3fptwfooA7zgzN0cGAR1INd0RPcHn9k  
bY2lhV5xK0XHB56Q2fvx5DVqauA2v2vuPewJ7gxXlu90UIF/NPvlkFIPCJN1  
+/o+gAp4hweuZex6As3lUnH8B0oI8VBgva3oBa989SNqpihgOLfgdKeeF+RY  
0usrEilAoG1Dtd/GCxz/biuOm1DAGM31sJkoLzA87j/6uPYfjnz16AJlpxds  
G8gllvXtYzFDobvMI17wkvUv7azJPja1MXmY840XqP8qmXozv4fFY1m6Yn+8  
YOvL88eMFHvY67ndO2ZK3pC/JCtmYbmLZXHNpV7r9AYN3qVzuoY/sd+5y130  
I96gxPZA1mTnB+ZJt/39xBtv2Bmm091Y/gPT/M7oXr3rDTfnsmd1Nr9jFM/l  
tSpwPrDs0NZffH0H89dTj7PT9YFWVDd3x2YHe/vYqI33og8cxOcw/mHZwR60  
uAmXRfjAhDh7BGXoNhaam09Xfn8HGnybffzNtrBF2ipkOeADuOYjPyJZtjCz  
2BthR175wEnBLxhhYBOT8n28lP/DBxjFIHgmNrE13W9PCbK+cPYS56wgtoE5

0uqnZ931hdF4RgeWiS/YeIzII90nvnBK9rsVo/MXTGXH6SfDc19wfx7TdeP7  
Z4znY4RH+pYvXGnDnB+f+Iy97KnTTjnnByuViSG50auYhsKdeHVVP8j0Zl6n  
OLOK3Wnuuk9l6gcMNUM8K8MrGKHxynEAD/gb1Ft/su2gunFUDHENfvBjqTq  
7bv1S1jHNiuoPPIDVefznOdNlzARn6MRe+N+cKa2s3DvzyeM1kZqJWrdD2T/  
Mz1sa/EJ65G3HwyX8Ieog2uXejkXMdntjozARn/A4pdsFCfeY6MXPk+eeOAP  
pC125seE95hz6zHeqUF/KImO3hc1e4/lhsbfl7yh8syl9IKXy1gKz81prYF  
LsNSOv7hr9fvsLK9Z7xhRZfBqLDsx4mIOUzqEqWbcO1l6HIFDG/mmMOedkk3  
Td+9DJP3Omnrm5g23GFID9JPu/w07FzbRarS7glvUcbALEnsDaq4BmMgirY  
qgsCYHjbwmX10Tsmf5c55ohOAI6q6u99p/Gilxqqv2MA8CyW91ghX8aE+97  
ucpnHwDj3gfXbJNeYhdTFWLiogOAEWo944TLC+w0/d9qrC0AysRpX72VmML2  
7xf1F3cFgAUNHwvX10lMx/Ps2re+ANh7JnpG/tYk9m7Q8Xz18wCluDTcyC81  
ibFkPemn2AyAr9GaA+dgAnNjyVx7fCYQ8jOn5lZZx7CmkaQb7ecDIagvpa24  
YhT7kRXj3awUCOVsLQtHzo5iaYwBa+X6gTBZmnGH2WoEq6OzWgv3CQTBKztt  
5x4MYev9Jjf8gwNhM/fpz9eWQ5hcqp63W3QgRlnavf23M4gNUKM1s+xA0Hcq  
OdUqO4itUJxak2gMhJkjF5Z4B59iUj38N4TuBslPy40MggFPsYh4bm/ezkCI  
EJE0jDn6FGP4y7zGMBJIfq9QpHMH9GOif7ZWP64Fggszb7iDeB/m/b1ntVQs  
CA6J8VccfvsYu9P64DpBOggOUy15Hy15j00Gt3qlKwZBs8P1kyLmj7HsrfrV  
EL0gOGGg073wrAe7+S131dg7CDbiDCe2rz7CdpoymrfsFkevP6N4ZFHmEKfsn  
ealEByFF53/UYS3d2Oix0FWxrCCgOCDfp9zfhX1dtVulvREExveufWumfojJ  
Xbe8vnc7CjBkLo7FF3dicZ4mXtsdQaAcezhiU7wTY1tWX10YcGkbc4J8V+0e  
YJKLYqudq0HAL6pOSRhvxwLmf60EigbDW5kG7eCf9zADUuq591LBE09B91C+  
4R4mosURZalQDNW6xu48NvewhVtnmM9qB8OJx6WSYo9bMZNye4kvrsGQ9fet  
PlX5XUzqWF+ge3UwiD3ZHdFLvI2xTJg8eFlP7m/oOXpa7Ta2kvyWSrM5GB6+

ud23Qn0bq/78I/9kdzCQPi2pMma1YAc6RdsW3gTDFR18+CQ0YxsX83ZtuEJA  
e8BaUGWpERtlPaY+zB8CTlmXTCsSG7GGxw3ZOOEQQOFPJTz5GzFH0d5j3Llh  
UDDLxSNidwOb+LWDXpqFwCeU3Jjh5Qaspdgm2Tg3BApz83IqlOqwHP3lke7C  
EJhYJub7fq7FPP8FH5asCAHbfUdxu/JaTMADX8tyMwTOWTez5FLWYgS5noGh  
oRBQfGLI9Pz1Nezyy1MsGrSh4NvCfbz8/hXM+lzWRzxLKBS1f/TejriCAX79  
watDoRA8lWkgonQFO6B538tHMBRyu18LHu+txlpadQZIWCjMHldonL9bhW3l  
+yS9jwyFZ4oceUKXyrHZb88unkkMBRej5gcvfv2H9erLnAvNCIWp5vqDK4X/  
YfnU++8YikPhJVGO5dSLMkwmoFdfqjUUjupd7Qp0LMXCzG7/ilsPhaUnVtqq  
rUWYfdORicHvobDV1SX5w6UI02KKqufYD4Uq/I+4gcNFGFevmmUdcxgwiW9W  
NUcWYu3nXtwdEwmDj69jx0+bFGC/D/z0P+YSBruGeorR4iTsg6+tlrt3GMjN  
uujKfSfiw40P+FoCw6Cjynf3xU0iVpaQMaqeEAZdnazOLVJETHHjqJhPRRgl  
CKmYpKoRsJhnyp86XoVBgx9eR50bjzpkUllffRcGxVb3JO805GBatQPDWcth  
8K4FpzemIMdjDZrsf0ZBoRl0fNfXbKxOmHP6H3OckB6PiPNP5SJZRM1j/x  
hwOv2rs3iu6ZWMDelu04cDgkv7ZjfU6TiSlOxWpVyYWDwEnLfQetDOxZbP5B  
VctwaHhq/cB0Ng1rXbFOEbUPB3t6eZOWpDSs7AL/z4Pu4XD0UbuFvXga5ip6  
fe5DaDh8QWe/5SenYr9edNenFIYDt5dL/ydIwQTF11QGx4QDMV3g5LntRly+  
uLmlZS4cJinrPts0JWJfKENPli6Gg8mrCdsc70Ts/qt/DN474XCxM9Xn56cE  
zCD5yAvmwxHg9eNLHetkPHZufVZrhzcCmvqdBlms4jHOi9Udcycj4MXKW56F  
+TjsveSZqlvnI8A9cvjJp+1YLGwWvi0vREBARnhLvXQMZqtJ91beNgIKDumJ  
pjyNxqBlxFjAJQjyFRQf/LONxpjTLGU3gyLgz8evG53ZUVj10V+KfFIEvBzd  
06naj8CGMoqLpicjYGU4qnfrVBimtvKNKD8TAZ8yTjg2TIdiD7V18CULEWB6  
DW8SIRGKNdH9Trb5FgFagksHXL6FYKQUm8B5lkj4WG7s+mooGLNJ4DNY0o6E  
Wi6rkweaArHn70K1tY0jgcHOOKXfPxAzwmBVGiwjYaL85ONLUoEY+huH83aL

hDrGwmrRtgBMMGZBeD0pEnZfFvWF1/G1sKvUf7oigQ1qr8UqzhfzOXVnz3L  
/kiwOWrAMv/CB5uTM/91fzQsonSL55QDfbDx7zTflt9EQndRibxgkzd2J9h9  
bv9XJLj6abP8lffCoi6L3qeViQKaYycbeDPcse3xxDvuSlHwjkaJOkTeHfOV  
nL01oBYF3RyVx74uu2H2X7NqMk2jgMJj5LiUgRum5vOFyHo5ChRPFQ6mn3DF  
mDyafY/ciIK3QQJCPntOWMJLT+ojd6IglewqrHNCfuhLlh2+EEU7PY9b9wN  
dMI+CBQOHBqOgrao02/ufHbEHsxGCXKsRcHZ8lH9c9M0mJSuTMfBrSjwE9a8  
f8/GAau7/9X44C75vjUr/NH39hipwDH2AFM0JA7hYly2L2HeRlqv2cSi4Xa+  
f6SyhB228PCfP5t0NNgWKxj9emSLWZ7poGVTjAaCWES+rbktpsYgfp5VLxoe  
8G6l7yXaYDy9B30ZvaNhx11QYP+bNTYs+1ad4UY0aDMECnFzWGJQUzRLfyca  
esv5UhMfWmBtHCaB9A+i4U0KnZCcpwV29VtvJd1wNFj4UD/xewKORV1v+E2z  
Fg3igQezMjMuYBtczgsarWioPhJ/aED5AuaexnuaZjcaqkzqqc9smWFmLrnm  
1EwxkDKu7WvualaJ8YU0U4rFwOrAjcbbuqZYdbaEFqV0DNz8036/js4U49xd  
mqnQjIHLNjGzlx0mGNWri0wUejHwoeS+Sqa6CTZLwNz+esWARWqLw2CpEZZN  
w8z753oMuKKb03BEH2PjLYeXt2NAjXFOSaBJDyOck3Bv7ogB36CnW2k6eliB  
vfFtl6EYqO1LP/8yURcrb8/XHl2JgezC3rPvaXUw/mdCfnUbMeBYnqztcUMb  
q/50j5TwKwbaFieD9Uy0sVqO129lGGLh1y2lLxzVWliT77GQitOxEbaum81t  
rllJjd8qDT8bCzbfE+u39zWw06Xokal8LDSMmD6iatLA7j91ZKLTjoXQF6Va  
Nw9qYD0CtdX+7rFwvwxPaPuSGjb1QmIMq40FEYkMr0N9gJl/7t46eisWrF7G  
cSqnADZNack90xoLSjxW05aagL2RDHJp6luFbrFDio0FGLaY0fb7wGIsTB4T  
9FXqVsHcq7SPf/4cC9fs/438MlDBVu691ujfjoUke2uC+1tl7OuH3bxl6jh4  
cd3RHUetjP1QxoQ/CMaB6+o/YXpnRSziwoT+Q7E4+F64kUnax2G7Xk6BRdJx  
cFvI8F5ZGQ77V5T8UE8tDkoj24xZZhQwhs0Bs7tOcdA8UV0y7C6P8dSaxKdu  
x4HmyiMhZl4ZTKolROjVfRwoI21mqwgZTKuz5I1ocxzM8V48UHFwBguaXJB/

1kWun/3uIXrlPDa8H7Bx9E0cGMjyeqzmSWNRlkSn5iPxICjNtKdSKoURnO6x  
U/HFQyubcZCWvRRW5zvTZS4UD1Ux7QFhKSwqaQTPLvS8RAXfqE+zPUsJtZ8  
e0rDJB6u3G7ojGmWwN7QT6nPZsXDR9U69bxsMWyL48emOCkeWL48SVKVEMMY  
+Hmq40vjgf7nLXn1CVFMRsZ5T6ghHvixK5IneESxHMet1sv98WAzzXSz++Fp  
rNKOMZ+KIgGsgHTfvMedwkSdedcaqRNAjvp7acS6ENbqIaFqQZ8A0QrnF3lr  
hLDhINNV9WwJkHXm+40IDiHsR0apviFfApxQvbvB/0cQM7onSIoimAApzbZM  
HL8FMGu1Lw0ERI79Bnfv3hfAnJ41GWAqJcC4wZiZWbgAFrJ6vJhKj3x/DGff  
6tZxrIwPiV2ySYCjEoVSowf5sZobFM8s7BPgZm9Cz78KPuyW/JNgi+cE8FdO  
K10/w4f1mOp0Yd4JIH6x6ueiwTFsKdXMRDAqAerv6jWSrvJgGxxHvvPEJcDr  
rM1vv5V4sN9Vr0oPJSXA/Lpe8dfpoxjLA7uPNFkj4DzXsu188Cgmve4etlya  
ALpDmWKLxVxYnGV0+c2OBOAQcdqUXzqMZXXUUa3tSgCZf4Je7YWHMWIAxVLF  
YzL+cp9if63DWE1W6tm8oQTtoNr/A5tN4CBvuzusNnEmAqO/uJyWSObAX+mYe  
3m8TgPN8D+uiEgf29vVhFpf3CZCf9+y/pu8HsY2tUgvz1QSwnKwq9fM9iHGe  
rlmR+50ALs0bM7zuBzCBVnf82X3y/Hk+Vf0SPoCJqopKi1Amwodd26/4SXZM  
2bYp+ihjIrA8sPW5MM+GOee1s+1xJ8LJ3xMGBqysWPPPUznHComgFPPmn+hD  
Rozq32u+MOVEuF1IYVHrwIhZ0n2iOwOJILG9PeFHw4jtHd5/XaCdCPcUT7yd  
NGXA9KQIYj0tE6HLKfir1R86bMkX388ekgj4HZ2l5lQaTDGktKkvPBHW0luu  
v1eiwfdRtcWR0YnApm5yLdNjclkdXl9TEqEd9eXl+pcqbHE+q+s94mJEHNS  
Szb/AhV27IOhpX1zliSd3ZX67xIFFrB6ETt0NxG+zR3I7BakwJ5sulKmtiWC  
4CXZNe/Jf8j7X+zuue5ECC8J1hZe/4vajzVV0o4lgnA9g3iy4j66YMW2fHON  
zF87Wv8gzy6qs+eZcFpPhOMBg53KD3+jXTfhDs6tRIgyzRFtd/iNqkNQdsLv  
RKiLvKieeMXWif6nzVnSIJBy3tN/MY/UdboePifU0mQE2OyVDuxg+xss5v+  
iSbBnO4x4Yr4HSS5pv2JWjIjnkrock2e3UFT9I/NWOSS4DfjbGg2fxvxqN+V

4NNKgi7N3Zxlry30ZfKy6wm9JBhQrI2QE9xC3Y7i/50ySgLfUMPTZW82kXNc  
LYOkZRJUHL93iWS6ia53FH9E7knwnmPEf0F3A0XpmPOoeycBndU+CmLaQAav  
Dphq+yeBxsiC7K/ib2hj7PbOCwJWnS/vpi6to4UpGJKHdOSwPXXaYnMyS9o  
sM7ROKkuCazFRc9WxK2iMlm+tLQbSaBUv1R9kXcV+fbNPMxqSoInL8L18jtW  
0IEPZmL5bUlg0q3B7b07jKz4NGlrniaBDFivCeOXkMhNSuWG4SQYukOpqC27  
hHYVu4NujidB+q369075T6jSWn6hdToJ9gPOUffJkL+aKd/UtJQKh5//TK  
1kfULri0ObSWBN1jyGyn5iPKun1VZHw9CW6sHmsIt/6IJJ/xFk3/SIJdycrS  
/d4PKIyJLXCZLhlK1A7bJ9S+R7SjW8Kmp5NB0ma+xknHHzr/yFO7K5YMYV77  
ghSP51GblvrJL5LjsLQ0y+ilP4/cwQqOP5NLhomXFO0Jbm/R02JZ7kKtZNAS  
1TrB2fQGve5eKkrTS4ZQo7oAS403KOxS2uEIo2TIkBUKIZybRcInXx2wtSSf  
325Qzzkwi9KalhhPuCfDvIZrrl72a2R/8Eo6h3cy0Ig8oyZivEZYIU00NP7J  
kNsshVOYfIWWcDxUy6HjsCB8ZKfy2Cuk1d+5ezM1GdBhjmM6T14iurm/nxVq  
yedfGfUeM3i05tFpb7HrybDoZ80fQvUctV0xXuG9lQy0hUbRSx1TyN2jevFv  
azJ0H0A6TOJT6OmW6tu+vmTogfrQsWOTqNLC27ZtMBnWJOLuRr2ZQGHttpJn6  
0WRgMN7q4P9vAgnHfXyZ9SIZHAWYniO+CZTGmDpuspgMDQaPxdkujiN731sG  
aivJ8Pwu+7b4pzEk9+zl8PkvybBuvHulJngMLRUID3DuJEMlq9HweP4o0hIY  
fDRHnQKOn7uHRFeHEb08823PkyngdcrBJuntABI5HBvMeToFGs60VMZkDCC9  
zXXZPrEUaK20lqqSGUC5jVMPjkunQFZG/10TwlPEKVDWNw0pcE/4XzSrRT8S  
ZhR9rWGfAnQXX4tKHXYCdJbKyracUqCM9REmP9aLvJ+wXKp2SwHb75IJMlm9  
qCl24/0f3xSIYl//SUPfi+S27n++E50C9ZpPaOuYHyPNN1r/BEpT4GpS4YB8  
TDdyb29/PF6eAgw38dd+sHejjEKxlJhqMt5zJm3narvQqDEb4+v6Fagut8tm  
fvEQmfe95MhrS4GXv2+qvlLrRK63XIX3n6fAa4E946NO7Sgta3rlxqsUODVi  
tlzJ1I4aPHQard+kwNyfwx/s7t1HX06IS7V+SAF2JRrWQLb7KKRoG+ezST6v

2JCWPH4PjccnGc6wpcLR/qwnuUl3kdBizaVpjlT42bXJPyx/F/XpDPg950yF  
qNDD3ALrdxANB0vuGH8qFI3Xq7LZ30FpNYXjyVTofVrD02B3m3y/Nrnu6VT  
YaGqZ0GD4TYa8Jtd75RLBRO/25zfn7YgBvnj7G0oFa4xJK5raregrKEG4xtG  
qbDHJPw4v64JiUmOONSbpQJF000V8XNNaIT09XKNZSpwqyYs5XTdQix20oRK  
+1ToKVCPzH5zE+Wud06Q/FNhKKplsPtMlyleemYanZsKr4Wm0js5G5B0xKZT  
BCkV/t4vkMp4UI+m5g4FhRalAouMVuFth3rEUWdNulyZCorJjbZMTXWoQOHD  
lEtTKnzo/2LrbFOLZCpoPjreSYXFZW7Xawy16CXl6e1LbeT+ZyIfCLTXIM4R  
n0PW3amQ0PaLp4enBpVc+n7BYDwV7vIviQmsX0UKvVyuulOpwFVaKzRVexXN  
CCuGaE2T+fvP/62yv4p4NuIKYD4VDg3088U/v4LKkxheyqyngkoMS9rMUDWq  
que15GNLA03jMdfgoQqUlZZ+Y/pgGlX4HCdd4VCBQty2/+YdSYMvx3+S1H6W  
I52TI/VUfGlg23FfaF2sHG1VRv1ePpMG0fsv5fSvlSGNopny07ppwDURHCD9  
ohhJhmpu+himgVQHhe5efDE6an5b85RpGtivAeeueDFaP5i5XmydBirKlvXx  
WUWoGK8AsR5pYIGkjWUvFKK11OKP2qlpsCjmsJHLIY9euFArUGamQUYS1Z+S  
FyT0S01yzoOcnHj6gelTCYmECii0ZSUK0qCLcFHX+yAjqcT8S004Ro69Jq7+  
OEpEhGALsbc9aVBV6CpVXZ+LoswexX1pYH1R9MSnEoucjoN8dx4MA3E3zJv  
mr3AI9w3mpjeZ2nQFn359xodHn3wbh2rn0+D69vttD9jspGs86HAoL00UGwQ  
z02qy0DCRz6zHKVIh4UXU08OXchAnI09DY+o0yFrVfz7fxQZ6IdE0AILczpM  
HSj0lnJIR+2/J4zrj6aDu5qhwbpoGllm5krOyaWDAp6gObuZjMQ13leTFNMh  
NSh8Rkk5GfH9VHEXRekQZL1qnOGXjP7afa0I00yHG77ChRNfklCPiAHrQfN0  
KL/CPn3leyLS6GH8ohmYDn4lXy+6iScgmeD36V9CyHEq7mHfl3h0SrjZH5E  
OkyzBAzQJcUjuhXP24X4dKBUnfbAWuLQoNXAcFRuOvgvXnv/jCcW6X9Lud7c  
mA5FTEeZHc5GleWrdpqWzelglZ2c0fcqEolbyLzfu5MOqvtCbu6JkYil8y03  
3oN0CAi6cNzwdQQaT1PLWBxMh+sF8uOnC8KRGT+Fx9Elcj53d5QXQtFj6wwT

9rV0eL3/9Zr6TgiSyj+gSLtOPv+CiSfreghiYzjBuvk9HVaiO57YcoWg4U3V  
u400GfAfQ7t4wL8ghBMfLu9mzAAa5r5jnzuDUI07WVorawZU/lnzsYwMQmlv  
nC9WH8mAAe8k+uUfgUi1P/lf+KkMuHKwapV2PwC1/GNe9RPNgKDo1LU/PQGI  
X7FgykWC3I9ahvytHoD2mmpqjWUzYcNm6WwmRwBqL+nXP62ZAetSpbIWfv5I  
ype+ZNo1AyyuBcUmGPmgqrq8xFHPDFC2OvTi5qY3YnvP5dPrm0HmI55pWuSN  
vliIoKaQDCgzTtlb/uiFGjDdxdSUDChCc+kpeZ6IK2pyLDojAxzlbcyavTxR  
WuvF+4E5GeT/x35Lnq8eyFXUO+tSQQYMNhz7U2DsgQQOZUvJ1mRA89Plc9aC  
7ijP8BDPmYYMmFP+pN8z44b+pv9HfeJmBox/t0qXI7mhub3GaZbWDHjb/f57  
BZ0bKlkajVl8kgHicRt+7bkg9gdsQ/kfM+DlLdLzcl5nNOi/8ENzOQMciIsB  
octOKOHkHaFfaxnwKWFh9UirE9rKsUiw28qAyzilW5XGTmjaoVz+FGUmRF1S  
kXTKc0TltGj1bfyZoHpzP+6ynT2yePDnuadglB8ih/3ZrRHbjfHKHmFM2FP  
KWYw/P4llPA64FK8RCZoD95UqOe8hFwa7x/WUc4E2+3LwfELtkjMVDN55mIm  
BKid+/ek8iL6SMt10/tSjmhGDlfr2V5E5Q9W5lWcMsFzoydYl/siYhPKUzbzq  
mQlyuew6PYXWaPPH1KZ3eCbYseGu0pVbofZyR8e9gkw4fGH1WNGUBQo0lc5t  
KskE61QKbtYKCyRGR/PQsTwTXO+U52l5WqDyy/Vc/dcyIfDzrbRNCgsUr7Y+  
jr+TCd0OuIJORXOktRKtcnwiExKTBSR6Rs1QnNDfdoEXmSBfXpH4s8IM3XNM  
kBF8nQl5nPvew5fNkNBMyplTC+R44I/V2SNmiHIYf/TMRiYYuTm/7nM3RQp0  
BwrFdzLBPPKV1JiyKQpQIx2Q/JUJSwF8fcmHTNH8gyL6cxRZEDbIJLLVa4Ie  
NlZ9lzuQBaw6W4+loiZoZ/lEoMLhLHhXHzo0RGOCzgjVfMfxZ8HfUSNjxcfg  
qKy84aOyQBYoRzPOc8sYo3D87Uk1qSxwoLVjKDpthKQvP7llZJIFVr0rCv6q  
Bsi7UVPuXDwLdlEbVw8yGqArywM1ptZZUBCj21g9qY80OI7+Z+6YBWdsp6J8  
3fTRV5OXmTYBWBtr0OBK9ZDQngrWruQLCjiuvulxU0P2Q3NJFyKyIJXAY18  
6zJ6aFh1PtwxIQuqEgQ9al/qogbpZTd3Ajl2e+r39Lgueufv9d6jIAuYnP5c



k9/RQZyNn+28SrIgp/RCjc+QDko9uXHBtzoLMj6c0mQP00HOh3+rBrVkAXuJ  
8/PPr7QR3w8m/rijLPCYuJ0k1amFbOh+L/i+yILlymzPITtVMK5fM32dRa0  
B478FovWQhzyT0RxC1kw++Iqu4aKFmKliJbd+ZYF8S7t1YEDmmjn92cDb/Zs  
OKbQxc21qYGkmWbZLx7Khq6fTj/ZX2ugyzyDU9pc2aATS63l8kgDrSnWWJ86  
ng3uWc5CrHkaaCHaznVBMhs4QI//3zkNNLo/Gm1plA1/z8+OTSWplya2TqRp  
lg1xKfG87/3UkTb/dUoZy2wQwU12n7yojnpRavpB+2wQELg0pi6ljtrjVfjH  
/bLBkc8o6t2CGqqhbLqhhs8G6TKjQgZ9NRRNmzcj0ZoNbE+L36pgqoiK8HRh  
5lk2qJzP6xiVUkVZPH+XU55nA0V01s1IQVVUctbvx+xsNtyT7mEUp1NFbRf1  
D6WvZoPkPTzF0jigzVv0hu/ociCFtDir6wbIwzKhJ081B/QrziuYaWJofeH+  
gKJmDvgLt5nJSWlozOfb+CedHAi6GdyN48JQSoL9WyWTHPh9iG69bBWhqzeU  
d5ftc6D9oIXvrTyE3v79dR5icgA3QTmns6CCLtQH1m+05cCcamFaW7Yysu64  
uLf2IAf4thYjwkKUk2Iqumn7hw4aVfuLXIJGXl/O/hn5mkOvG03P1wiqYyS  
508YPZnOgVOHfX+PTyqh2wNb3wt/5ACDPm68iU8Jtc3M6hF2c4BJ/4woDYMS  
evi5tyrrbw7QB41fK9ISRIPs+brxdHgwIyj2EAYV0YLV+QpPTjxo48XYFCMU  
0ZIX75YzDx48NYTf0bgpoi/R1NqX+PFweuang7SZIvpV9XzDVBgPft8kcQMS  
ioh9JvHDSQ4PdYl+veZrOHR417ZUVhEPQzUlWbdncYiHRWP9LMKDGf03qWAE  
h4SlDpclaeGh5wPzmX9NOCsutveFXw8PLe+Uq/Ku4JC0+aLqUSM8CI1G8bYX  
4BCKaP3MaomHlfGzOx9icEgjxwYbPDwjqNFZj0Qh/TKUwqp7PFQf8VY85oH  
Dpk0+a7tOeHhCMehEjp7HLLsMcd+uuHhz+7fymMWOQ3pVyw6YUHyW2u0VUD  
HHJeFFr97leHBKIzMUgThzx/sKClQDz0+3507EQ45MfwnbQQiocr3qqbgwo4  
FMTzdnk2Eg8RsmVLledxKEK8X/lLLB6yTGYS1M7iUBy6RXyWiE31E5f75/B  
oRSTwqWhVDyoL8lWUoviUJZrFjfh6IuXa0YqdxlBDiRujG46Ekf6bgrDAO  
FaUZfmon4uFszu1ubnJcXiKreLcQD8Lsqzur5PjqDb68W6V4uHA35Xq9CA41

PKRdrK/AQzp7ppEl+b6m8a8KV6/gofjBrsWuJA61LrzEl9fiwVJ//lwJGe+D  
ra4PRdfjeWsFcxcDvXQ1MkTb5HnEcl69jmGQ085c3Oyb+NhXd1ZJlIbh0ZE  
wt6n3sNDg7HStJgJWc979VHKHXgQf3F0TuUiDnmrzhzafkjWc82dqOpC7j/G  
d0t6Dx682F7l4/xxiMlGWcuxDw8SD/gTRaNwyGbj7x3nIB40e2390JyOQzeC  
qiLGRsj8iujy/5H11sumalR8jocly97Whbs4VMYlo7E5jYdrC10h8304tHbN  
7W39LBnPi+/PV6dxKPPhIPuRD3ioXNaYl/+LQ691dhtGPpHjvZn+xEOKSOTl  
GbWkVTwwel54vCxK9v/X3JBvG3gQkez35rRRRNxRPax103j4EidsvhSsiDzp  
tursfuHhHAcaXMhVRPthLWaG/pHn98VpwIW8L5aNaUEJ1LmgIfokv72kiOrk  
25nl6XPhdcELi4d0SkjLhBfVsOXC7484J3o9JVQ0Z/DKHiMXCruYFgh+SmjJ  
My7glGcufL0t+8qJpIRSE99fjePLhQ/TPrUr75RQ3516+ovi5HqmqlToDGV0  
GJupZpfKhRsHa0J9W5WR6wiT4tPzubCiwE5B814ZUS/6+Z5XyoV9mawzgsq  
S02IzCSrXi4U/VR69Pu3Cnoc3IPW60HGq/lqjSufQwdots5H+uQCn3JU9cwg  
hhwJJ8fOXs6F2OSPNIr/MERxPe1feVguTJwOzXstBwhmDVzDU3Oh5tevh40N  
gLqVZyTER+VC4F7JukqpKjpcEcY2UZcLcb82GufuqyLv/UPfgm/kAktQhl7H  
tCri7DZq6bydC70OuxuiR9SQH9Ynrd+TC7KtmbozBWromFqzvPfbXOhoM7Pf  
rlRHUdqppg1ceZAYgtgtOauJjuoFBQ1488AlZsU49J8mEmboodrgj+cf9K4v  
C2mhqcHdj/LCedDgIsxjHKCFRPUctAZk8oD1127uEUZt9NrAVn/JNA9mK/8K  
0KnplHmzcXZCOXkwwUtZkjemh1gU4505CHmAfG1VJ3f10MKjsdtMBXng46/Q  
dU5EH2VserJt/pcH3ELlFwyS9dEsoXqgqzEPFG0UPRkVDVDcm3ZFq5E8eMb0  
iK3tiiEyu3/JU+9ZHiSmu4iMjBmi01WNRsrP88CS1SCs+rchmvDX3j75hsyn  
y3M/ysQInWCLv7mxlgdnLxvOR+0aIWfhcHZNWgKssVhk/+MzQQY8lXWIngDn  
KnouHDxnguTY+IUUGAlgqGH4/L26CWL+weF7hpUAtf8xVrV5mqdW/qbBg0cl  
UDE++menyQRVdrx0Y0YiQGHoP/beRyYo49beD5qjBMh4OCWqMmGC7Ar1Tv06

RoCt9bIjshsmiNZtKXFeiABzmgG0m2dM0YY169HXwgRoNXCX2cGZolkDmZZJ  
Ejf9MTF2BdqmqEkma5PnAARx3RNapxMUYNi9dBuSXLv+obu78pSjo2wdIu  
RYDkJousA1GmyJKGX6lRhsyv88TFQYIpgl8aUzVyBOj0eeUY/Z8pEvvi41Wp  
QIDJMXHmzlpT9095RzFRmQDOfj/WX7WborUB8tcGIsBpPNNey2NT9KKT/mkK  
EKD75F8ztmFT1HDNYidcgwDUUU9SDWdM0X3zK7eMtQjgMLB06nhnip7SfnU/  
rUOA0dXuoTufTNHLNgWBF7oEsHlnHiH/2RQteqTMT0sT4Fjd5BfNDV00zT1B  
ajlkgKCyZejcjimiGuY1SDMmQHwVtePvX6aII9qD1t6UABrju7tle6bohPjd  
btkLBEh4alfw6J8pknr7N5zVggBaaXpRblRmCHL1zn2yJMB15k+7WTRmyBgr  
WntoTYD75oauknRmyH7j/bUCG/K8HGpojOjNkN8ViUu+dgTgF2MWWyHHMWAR  
nBr2BCi7c1XwDznOpu5/xutIAMaf2cqp5Lis9UDmthMBor4v96eQ+113s1Mb  
cSEA5c1XLL/I97VzNvy56kaAju4Yh7dkPIMD261RHgQg4n4wn6cwQ68iMH8z  
L/I8WTwcf5L5LlImnxbzIYAm4dsNkd+m6Mfs9AKlHwFke1tw/eR500Ylls34  
E6CmesRm5JspOqzif+F2AAGuijrZ4dZM0cn1DpbMIAJgtqQc1kVTJF1F+9Qx  
hAD48wk4rbemSNXENF4hjACVlfq33780RSaUFQoHlgiQNHFEbX7MFDncWdlc  
jiSAPvEfTrHfFPm7yDQ+iiYA86bo8nanKcL3j/BdjifArdS+0sh6U1QexvVK  
K5EA7W1hSmrlpujmaRcCfzIBfsV9HXYi+204c5dqPI0AMWM3P1eGmaIZRa2H  
tRkEmDeWP9rhaYpWPhNDY7MI8NiJye+kjSmiMxJdEc8lgLE4W897RVN05F/I  
FRoCef+kLPzUxEyRUEuPzRyRAEWC869EjpojdQ7rsexCsJ/u71ASv5ughOm0  
02vlBNBOaEtfbDBBeelTPr2VZHxX9A1KC8j7qcB/qqyaANxs353m4snvn7J7  
xbo1BBCuFK0+YGGCftsvoxjQ0kvtvymXn7hijoGVVbfcHBHChd1ZVcDJCMoDw  
7/aQA0xn7W6ShI0Q+2QmvVs3AUSTjzbz/rRmimw8mB1x6CeABmS+4Ag3RJ7yT  
jtMwAXSdHLhjggyQtUyirt0sOX/9IeuEvh4SFq29bjtHAL5vZ3wQtR76zjfe  
aDtPgLPRhpvzHbqIRH9w+OIHAij9OuLXLaSLRmer9azWCEAT1/tacIMbYYk9

+ma7BHgR2yGV766J2MIWG033yPpKqc1xcGiiOW8GFtO/BGC4LJ+2+FADRZib  
jBpTESHi+PRw6gENdOf0goEhExH4tddGfzarleHxf4Y6PERQ21AcarqKIRZe  
zAQpEuEpl+3AotV5RDGWPsWrTASsKdS/pUQabcdNmP9WIQK1on5g5+tzaPaD  
08VWVSK8SH0TX24phepvpDiL6RLhYuHfjeF8MVRmN7ZIr0+EhP5H3qxMoiX  
jdPjkwERauQGg6jiT6OQoHqfahMirG5csAgMEEJqisMhnNZEULjeHqFmwofk  
vnD83L5lhEWuM6HGBTxItNI2ctKWCHJ76bH0a1zoANXX2BwHlsxd07OrGeNA  
1K2yFN5ORlgVe0l//NIB9MMtLknbhQh2ZqefL1CxoLdD70lUHkR4L/hlO5WL  
Gk1EWzMueBK9dfu4+xfZU+iSvZXd5EkC4+lDE28l3l/rtV1v98yXhtX2VN  
2HxRuUGUJkT4E4FlQ9ot7+UblUr1aA7LACJQHD1B8TM0WYX4/UnB+SAY3ske  
HePPr7siLlqUrocSoY+TSySmcbPLl7mSdzScCAJRil6srT+6HLqWKq5HEqFq  
hHdaXv1Pl9nlsWlp0WR+WYF9zyz+dWmdiLjqGkvmd/R3n3kIZTfueY+QWjwR  
kIBYt8EeVbd4KmP98UQiGHLV/8Kp0nQLyJuJ7icRgaCiX5WmStt9aLWscTaF  
CHvPNufK/9B20/33UaI9jawna9jckh9d966BeEthBhFcz98dHC+i6/76N0Q6  
OlvcLyFltDuErnuhpavVJicIUtL9HCfo6LpfONPJS+YSoTLN5KmDLm33wGHj  
DmYCEQIeUnj8UqbpfvC0WgmVSASng60CvO+oupsiFrqe5hMhvleNz1eSsvuK  
mCjUFBLB6DiHW4rZ366CucDexGlinPbt42Qv/92VktAw6GUCBO14167uJ2u  
aKAeUP6PPF/n13Syf750+W/p6/JUEKHn2g32n5zv5xrCkZ+VpLzb+9USJ5/  
0qXDIDxx5yrZb9NzRQc+LqooP/A3I9QQoaGQd/8Z/6bKWd/7L/zqiMAQVrXz  
ZfunCueEzozIDTJ+OpUrarTU6G0xz4fk20QQUmswnFw6gGbPezME3yX32w91  
7ujjQBPPPCW17xFBZ2nx8du6w+ghvXvUt3ay//ObuZRDUVFRuCMH9BBBbOTY  
gd1DAijnkIPC4V4iXNtr6L/NdAIlN1+yX3lChBLOPKsVCkEUsGxzgzBA1vvG  
V5+ktZNlz8pC7f04EX5/KXilfP00gu0LnvcmiNDyi7DRRRJB8nlmuZlT5HqV  
jXL+SFekNGA8e26a70+jl5jPKp1B+3j6QUlviTDbsnhkny2JdqZ0SizfEUHi

hPZO k9lZtOav3S32nrzvzPc6jjNJoek6Dabni0SIsznHHtErhVo4sasnvxDB  
3JhiY4NfGtXdURn8+ZUIT/QcqH8HSaMKI+X1kW9EGKCYdb7eL42y0nCKIdtE  
oOOY7BxxP49cf5yf6tsl+5M2eyy/SAbZkKR/lewRgY8dj7Odl0Gmkuf4/f6S  
9+8R/SU7IVmE3CW9j1CRoC77SMKLG7KIa1qEyp2RBIP01pJHq+UQW9BpEUVm  
EnxIWjQ881o00bAJG7GxkmCLOEVgYJNHG5ony9oOkCBiDnf+a5A8Wnp/oieL  
gwQ0FlfXX1+RR29jBZbsD5NgaTo3yXpcHg3f45Om5yZBmO/V1TfHFVCP6THr  
N0dJoNRZzdWnoYDuf+WJa+YlQXTm5HMGDwXUIHm0JpmPBLdCqvXL0xRQzSnu  
YavjJDDkibwZcE0BIT3m3DhzggTfuQZORnQpIOkIi5wUJ0lA/nCcr3mHgDJ+  
H1j+IUSCa8RA5tUVBRRXyOHclEzmq1M7LbergGRCVyVrREjAZJVITGIkv7/M  
e/5UiZFgDuMuNj6CQ9UyxYP/iZNA01+b8RIfDlkc9i8sliSBn+EBqusnyO+/  
HQ3nfCkSnG+u1tAVJL83n/OezZMmQfvIk48nyfmwu1t/smRI4NsbYjTHj0Pi  
+UODaXlkeE73yy+FF4c+BFUXJimQIJCFdEaSC4eKzcKd4xRJMKaVHvD5IA4Z  
SBudjVImgbfoMeFzZhyi4ji1F4pIMHS6UHaFBofaN/8MBgIJAu7JZejvKyD/  
yalCPzUSfNTUpGf6roBmCAIn3bRIoKHSeXbhgwLKDbDac9QhgXJ2YyPvjALS  
MJEcstMjAcsNnt+/xxVQC/ucs7kRCSxF0m8tdSigtFz5InVLEhwePkIRlquA  
IP3ZXDBrMh7VyOyuZAW0ZfjprJINCXpOxUvLRyqgS6z5Q9L2JEigTolgcFNA  
HF+9iiQdSbD9kXkt2VYBDY6Ci5gzme8/7WORZmQ9bnJJCbUo5tdvXble  
Oet7J9xJ0HJv3YNbTQGt+fQP8XmSIEr+w4UlRQVUpV9edNSbBJ69/9WGyigg  
8zPBLkd8SfBnyEHrtaQCYmLWkzroT4J7j4OOC4iR/bUmsM8SQAj+vqM8DSIK  
KGz45xBDEAk6jluP159UQOI3xotoQkjAPHbuKJOgAnqfWetCEUaCUgaJjdIT  
CqjIK0ZqL5wEi6FjeE9y3kD3wv7PSBIEZ1i9SRdSQFSiYsPb0SRonhvg+Hta  
AbUzUBZ/iyVBfZ/5GwZxsh4rr1w+x5P5bR1asJdSQcHm6SWE0kwIRj+nVKW  
rEe63fB8Ktl/53euyWfkPTzOF8+mk4AjZ/PTCHkfdR WYXKczSTDaapt1T08B

udG174/hSZD3ERngrRQQz1Lu8FAeCe4LlHPE2yugiX634n4iCSb/k8SPkuev  
nHroXFchud+Dzo3EULJermv77cUksC4oS/oaq4DqNR4Pt5aS4ClPOM9D8n5x  
0Fx2vVlB9mvZ5q3MUgW0mjRc/F8tCZI9PaqP9imgvuNP00LrSRBS6shF+0wB  
VT58HGp8nbxPrz6HXJgl6/Gj/QL1LRKonWZ5xb+lgCTzW9XeNpFAl03/ZeVf  
BcQo1XLufgsJNm9dvpVO9n03Vz27TysJHHq75kuFcaiE7tpfjTYSPGMhnsq  
g0PB1yq/8reTQKazwtRJHYdE3ha0THWSgPNb25dVJxzKN0lJV3xCggZnaTn/  
Ghzy/xofdrif7K+hJwOibTikkxXttv6UBNcphh7+GsChv0+C1K8Ok8CrI+ld  
xWcc8pR3+sc4RYKu/MnYPGIFpMKPwmcWSFD9eXzcpVMRcXfi3O9+IEFolAvX  
3RFFtGUla4FfjMHLkhdyA28UUQNR/LzqCnk++O6zEn8UEQct77eGbySQLXoW  
HyWnhL5c4ZxP2iQB4b379ygNJTSAOMbstsl6jnff5DdTQjERjI0HfpJgtViQ  
E/NVQsuff7pH/CXzF3qt6/+fEurN2LYwo8iHtW6S+qE6JVR+6puGOFU+8LFu  
reJalFB479p5Opp8eEg0Y5rvUEJmDkuCC7T5wPzsQNCfXiUkvvf+4AP6fDDQ  
zLzHjygh+tK3FAWM+fA8htuQ+FwJPZx6Ma/Nmg+OopVH5t8roaLLE2Mn2PPB  
+L9hE+8VJRTIMvrwz4F8yEs8Lf5oXQkJaz0paz6cD7D86Xv/rhIldty25DqW  
D+ld/8nZH1BGYmWpX7j58+F698W6m0eUUUV/UxSQegXzwnXaofcyjjH4pUTbx  
CeXDm4xnzupCyoh07KX6ceF84HjyV/SOidIS32+YERDjh10zStjncWXk2G1C  
KySeD+t3mC17ZZTRbqXQf6ck8yFFcOaBk4IyKoj/JXVaKh/eCdNOPVNSRpKO  
o09FpPPhSd5WFSumjAah2k5MJh++i90IHlNTRs4nQrbOyOWD4nh54J6GMtqj  
1MmQUMgHK/Xjcc3ayujsk293pZTz4cyK7w7RgFx/7YmuNCLjv7/v/sSIXJ9S  
/078/you83go1/+Nt9iiVLYW0u5UmrFk75mPz8wgSSVLdipLEiIEkpQWJZjn  
Q5RWJy0i304hlTjKUshSiqyhJNKJVPo9vz+v19z389zX9Xlf98wgiWlpU30r  
bLj93rvD9UUkRnh01N6wJYAxN5UzNCOxqvFHRbc9AdoaiheNLEh0ep17d9SB  
gEqpXgMTSxJ75vse9HEkwLu3sHqtFYkG8Yd0c50ImKhI2iGwJnFWr0dzozMB

qX/vGINNJBPj7wxucSFA96RBEtqQGHp/fHKJKwHVu2SXiWxJPFYZnXzYjQBf  
q7YHYnsS9WbYLNjWj2CSZv5m860kag3bld7idLrc8R4LjxKnlh4VL/EgQG/A  
+YCLC4mZ3uuyE5yuqebNtnIjcaurrVwbpyclNRlbt3HP3/Q21s+TW7/5oJ+N  
N4lbbtvVv+C036zllJ0fiQcSv/DUtxGQUVf9aGsAiWUTnU+80F2bEvbJOZjE  
L0o7im9yWsJebY57GikPO7M2SG0nwEi5TLQtkptv1KvMg5ze3bQ7yCuaRPMh  
XsfCHdz6f0wlfGJILPIqXHuM0+dZxXTfWBLjHLrF45w2iuzV8jvCzXfd3gux  
XgTUOxWV7zpK4q6Hq77N8yYgwPiM6+7jXH5GD0VnJaa7zUcEE/iAxP9Rad9  
CMgaNzgrdIpEi3VKYj9fAkzeyi4IPk2ifrvhd/edBDQUteWHJHF8nfB9H+RH  
QFBGvmVoMpfXY98rGbslkDl4vC0shcR/p//520dPwCV3l7B9FikFg/85OQQQ  
wBEpG8lwfvtmU12BBDSpT8nan8rxd3CeIN5DwLT261XRGSQOxUgm7Qol4Fr0  
Gsnw8yQsS98joYTIAp/CIFZJH6/791+K4KAaNm6PPcrJP4IdDWVjSZgSG+M  
hZscbw3rGieOEpD453CdwW1u/lZfZm88wfWxUk506w7n/2JQ4eWTHG+eC2MW  
FnB5mhyOckwi4PVJC+9JxSSaylb3xqcSEG5fmzn2kMR5B2QktM8RoLDQpXno  
EYmtLvri3kwCrAsCrTqeklh9a6Ax7jIBj9oo7dIqEl+fyf6dnEuA23V1/8Ia  
rh++AoXyfk7voX9fzn9JYorx05S/x/E7rVjl8isS38x/MqermPO7putX3FsS  
LR/8fnezigDxRIBBdCuJ07flb3wkoD2Z9/3hL0nUf7s8f23XxEw3002y7uL  
xPTGxVKL3xGQFK/z3PwTiWYtwxv2DhKgaVc0BT5zfSo+oeo4wvV3gTlh8IXE  
PwW0d93HCJhy1ylXY4Sbh47uzldTBBDDeoiW/sn11yJ7VsQ8ASj8Pe3ln18k  
3q3pso1dKIDbe0mZsQkSZ//YW5C3XAB90tkH+qZQOHBEeXKyrgDcdF9sfy5L  
IbVFOGyzSQA/fjmeezKdwuS+Po88BwEwFR0ND+QpnJT3U4TuAqh1+29djgKF  
3Wpf0gYCBGB2Qo2fMJ9C281dd+kkAUjNrDq5XY3ChzMclXsYATxj9vcYqlPo  
pZzuvuOCAKyvNwV0L6ZQpshGv/+OAOzKk+VgJYXWUa8kTJoEoLTRdKeSJoXL  
M5WyZNSF0NTwufTjagrPxuSsk/8oAJduqyhWm8J/DNINeRMC2DFVsn/IkDtP

ZgVErgJYlnDXrMKYwsqXk3GE+3vwQWFHVuZazo++Sug1IYD/kkeOVqYU7nBM  
nnzfGSBEuP/fyxYUlsqveJp2GiD200fLWx0ojF6sM9L7G0AknfFntSOF/JB2  
szUzTEHijXrVGcKvd+HKT5RM4X489kKd9w4P/UzC68RpnDm4fbD07wpVCv7  
K2P6IVM4/7PRo3gvhZ8tNVffkUAojiiZtySZQu2IH3PEDIJAbK62KIXz8332  
JbsshBL5anV1ikLPqemqO3MQHl99s3R+KoV9KivsqrKE8lffeApZFNL+JxZ8  
/4DwQktTNOUOhZ86bi5dbyiEzT/zzCblUzizb30GIRRC7b9G6ybuUpj2r2LH  
ig1CqHe3sB7/h8Lbnu4W/R5CaE7YvvXrIwoZc8XS0WNCa09l/TtfUjj+2yv5  
YZ0Qt9VD2yv484PLk+HW4TQGxN1T9srCk9dNrmg1C2EbuW7YS3NFCau6n+2  
9LsQ+sUvYurfUxgZaqmxdZ4l/Gc6HK7toNBX+W3n58UiGGh5G/eii8JLsfcM  
9qwSwWBIf3xlL4WlkhGqq9eK4OsFCbL0C4Vh8v6qB11FELo7gX48TOEuSGrY  
7CWCbwYKqSUjFFq10itK7xbB95qFmYWjFF4oVELbFCWCnz9NsvP/cDwa7pUe  
ZEQQxfHk+p3JNLosWaD9KlMEEymWN29PpXFk8Ytq9ooIjq3ampcjTSOTF/Km  
OE8EEk4hRZdm0hi2Vfald6UlctrV2mNm05gwfdZo3UsR2Ox6JuGqSKPPSaub  
6o0iyIhauElxDo3UL78Ku/ci0MusaY9Tp1G1Js1G/asIWpbvl9y2iMYky1W5  
kd9FEHt72SpiCY3htY3l/xsXQfWjA6HfltOo7hTj+3qKGHw6V0r58GgsTvvZ  
e2e2GKbvblwl1KKxs3xiylxlMeSPxG5eoENjpldWpMdcMUxlvE5t1KMxhx1y  
06EuhiuJcQ/zDGjMmhdY6rdYDFYqWp2JRjQ+qBwM/GuZGji/jmtaEDTKHHxz  
xGSlGig7OjZLgPPvye9M1BRDp1Fr2IQpjT/XbAst5okh/kl8WouQxo6P3nnl  
WmLgW+mV3BPT+D1Md851HTE01L/vTDGn8UNpyULfNWKlck2Q3rOORvfyP+a/  
9MSwqNtg9Yb13PsCP0nsNhDDvwGdNn9t4PLKiWjOMxRDwH+J4VM30ngzKN2o  
1kgMCjHG6e830Thxff3lcmMx3JfqKSmyodFg44GUsyZi8DiT3MXa0jhp/fLD  
a9aKQWluIRNmT6NskuBjDqdzsnpX22zl9k8vtBzltM1Kcstqj25+95LnzCXE  
MJoH+2RcaHQ78E/ddE6fN/mY3u1K4wLrZV8buPvmT+lHj91pjj5XM7KH0x83



CLszPGlc3pC9pZV7f3LDgMz+7TSWBeQcV+00gXsqz8GLRqmGyhk87rzvesS2  
Oj40po5PbJfn/BwJ+rJvXk5ufx0x8Yjzv2I0/Vy/H8ejZZS7UF8MLw5ZPC73  
p7Hb5tb4WS6/MJmv3RcDaAx+W2WTx+U7/2zmtJggGq+/rmo5z+X/eN56vksW  
jQLjy4ou3Hx8L32zNdhLY/Pndfs6V3G8aGZFKITRuKw396DhCjE4EaOPKyM4  
//4Xfc2XcLyUXeq5tp/Lp1EFfv8/Lxs3ycYdoLHR8q9rh1TFMORx1W7tIRp9  
pYcVOxU5XnptIuccpjFCj5n5ZCbHS/CvjJEjNF7UvH3CT04MJw/bfbhxnMY+  
E/k38hy/ut8KbsfEcz4P/fX+C2Cd74qEVt00agctuWq1JgI+NZvpEcTuc+j  
fRYu/CyC5hKT2udnaPyig95be7l+6GskZpyl8c+qY272HSKoV/FcKaI5fuw/  
hVxqEMGBk4+HlVga/Y1dqeEaESz7tbiwN5XGazX1YZIVIojo6LZKzODmF7gv  
av99Eajd9A94fZnT+1o7j6aKoFy9Wu/GVc5PyWvTgTMiCDrL+30wm7sPTqkE  
K50QweN9Q4lLb9AoVBu1vxomAh/hvtygfBrH5NKjixFIF/QHCESoLHUa7RI  
VSSC+xrGqHSPxlV9T1GhiKQnf6r9sEDGlu+ZvzOXiSC202Hv0o84eYR03Ri  
w5AQHNd3FTaX0vg1JcDxWJcQJhWbxWU0XimuXBZZJMqbC9KK9k843hyXfD0  
eJEQRncn6p97yfxDwNLZ5IgQcHJapE4bjcSFK4LEydx9Gzq0Eu1cnuIpfLUh  
hJQPrtOa02j0vBCiFniG0F2lnh7dw90/2dmhRwoRTjJXiiGaLz9Y3QgLRih  
XvPOhPtPGpXmPr3dlmMKJp39gU6/aQxKTGwM476/Lqcubbx9Q6P1seSEUjtT  
CJNki9ZNZdBj2qQnZ34CKL8/GKkx+DpB+WKppYATikbvkqoMhgZMujv+ZqA  
trEPPTdMGAYqNwzp9cYLHIXOVwjGByoujE46b4x5Pq4IGUBgw6HylvG440h  
tr7mEi1isOCKl4qmpjEsvlNgeciKQVtMaK0MNuJ+/x15Y+vCoP/eUw/DpxrC  
p/IFNT/2M9gc62Hf76wHkcbRHvUHGBxRcjnao6cHUrdavuQcZPBE1lljwSw9  
WESxCm6HGcyqMDWRebYGtu6Y7VQsz6B8uG/pBmINdDXu6WdOMZjXM9PKa/4a  
CF7/ImrPaQb1s+S8+8Z0IUE7IXNRMoM/VY85mP2jC48nJLqOsAzKbd7kdsRY  
Fzbt9QpzTWOwhe90xVxVF972PJHU08fgcE5lQvxvHfheHbOi5zyDPVlhpsxT

HdA8Nxa47hqD45trhgMddIAxHBIT+x+D58lO8a4kbVh2w+pU9z0G0xU1Uu5G  
aEOe+nXVh/cZ/BZmqHZ4uzZUS/pCUDH3/GW6vrkG2uC8v+ylRQmD/6TZ9iot  
0YYPA0u2L3zM4DuTXA1peW2Y3PA+rvYpg/nnVMoNXmpB0jpQvI704Nyo0Dya  
owVqRRnXDlcw6P3RXDBxXAsMLjk/161i0DH56qNTYi0oU77vllfDYPiOvIpr  
S7Vgy0mVga4XDLYVDTPmkdSCgOBX8nQ9g8fPtUxLqOLDjy6drMAGBsMCR/Oe  
30HDccdkHYsmBpvcl/RYSXxQqhosVX/NYFBKirfmIT5chl32o28YXKFzaHin  
Hx/4+Td6Xr5lsMxz4UZJOz4UL5eN+LuVQUmzHCMZUz6sT/OTOfyewYapjuHh  
q/nQNL0izbmDwaEyt7Itqzvwjl2uqdvF4JjbXz9clOPD8EhcsWwPg9adm8/7  
/+ZBzM70jV0fGNQ9dePGnSEeTH+L74v6GMysJGoje3iQtulCMPWR4+25SU3F  
Wx5olP6eHDjA4Lab77wuveJBgb4baT7I4IY0Z4cZNTwQXi9cpj7EoMS9vh0z  
nvHg/gXpm7yvDJotd/niVsYDbcZ+jeAbg7XW55vzSnmQffpiofV3BrPbBu4r  
POWBetyg0G2MwRenD2ofL+cBvX/t893jDFpMi3+rUMmdLzje5sAvBmdJmTk+  
quVBnG9j86kJBnn6/Zjyhgfjbks80yexeNEyVz+lmwchdns+XJ/CYtDXmvry  
YR70rS8OfCDBIt0d/b81k/ngidP+eybF4ty6kahOBS4/g63Rr2VYHN/l//i1  
Bh828i5P7ZNIkdg+d+kCAR/Klg6dGp30YrufPt5z4MPa+QIF6Zks9un+KMgJ  
5kP+rFNpKrNZdAo5pz45iQ8rpZsXaSiyqN1kN//xLT5k/V76t74yi3sVXcwH  
X/JhzrdgLfM5LC56200kfOND0seH9+znsQjv+efzVbVAskMWvFVZrKoLkNpq  
rgXRzY7loQs47d2sEBeiBbvLhl+lLGZRpDc7karTgs5CcL20lEX7j9nzn07R  
Bpe8hM685SzWdlr/nKGuDZbnlw/XrmQxIJjVy3bShkfU3sh2TRbTc8PGf3L9  
Mkh490cLj8VpfywW3knl+hfpLD9Tl8VcK5NlcZs2nAu6RqvrcX7HUtavnKoD  
Cj4janwDFn2X2mQcWkkDk2wTNTeasKi/Zeek0CgdiLBSyXcjWDwp9e02+lUd  
GIS/TAKARY0Mj3lmdTrQqvnEMkHEomO1kts0vi7YL5GvTTdjsXluZl2uhy5U  
z3V1zLFgsfi6n6A1WRcKJf/zeW7FotkvI92WH7rAvF8RJ23H4oLFlSsftK2B

GU3hsnMcWFxmHflxRFUPjlaXntVwZDE2zlKl1kUP9j5wyzJ35eZ5oKR/f6se  
bCKTH8Z5sVjfXdDd8Z8+lJ9sNSN9WFzrpiVTKTAAInZV9aWdLH4Z815/65gB  
rAosa3mym0WbE9pNWsqGcNFr9o66QBZPFXKPKnAzhLkuHv3tezh/LuGfjy4b  
QrLNjeChEBYTT5e+nfzJEKTXjY3+CWWxd03Z4Vwdl/g/Gd0fjw==

"[]},

{RGBColor[0.880722, 0.611041, 0.142051], AbsoluteThickness[1.6], Opacity[1.],  
LineBox[CompressedData["

1:e]wV1nk4VdsbB3CKJJSQGYlyZRkSDn6oqIk8zwd8znlcXAOZ6sUmSuinJQk  
XVMkMmtw69eguA3Ga0wTGRMKlfz2/WM/+ /k8az1777XW932fLefjsPJZwsPD  
8408/rvrTXd+Ywrz7ONRSY9caqa3713K57lxdt++udeM1KRnmxDVKBVawh7f  
N1e9RMCHux2vP+nanGUv7At0jtN4sEcXs1PP9x9nr4JhfMmJ8jgTCP1cTQlj  
S0FRUXC1uIY9JJ28eXrMZJB3crdVF8cBon2973PSZHH+TYff8H1HbKdo5An4  
b8aMU/yVfVouMFvoVW4XU4Dd7Rva+yOouHRCQzeYrYrIQcNDmNfeyFbtu7LF  
Uw1ra/QrL1v6IL8v/neH2Q4kFN1ivn7rg97siXfZaeowu21meK/ZFxN/jG7y  
+2vAmHtB3+g2DSINE9tbxbTtxtKiuNVg6EBtFn3SXnNeGxCYHyeTYQEgWmpPj  
+HSg9WN86bbRQMjL7B/XndTBg8X7UfPlx6AdlVmW81wXpls15q+oMeC0b790  
EJuCT+1LM1fMBEMtXil75w8K2miEm64sE0ter+H/ztlHvax4vtKUIWK3vpZI  
1j40Duq2Xct4o/+3pr99UBC90jmScMQfPEs9Vf4CbRVn5pypYegJU5Oevke  
A4jwJDZmp4Sg4JVAfFOdATrAyT7aHQLtzYrqzpDrNYwCsunhWJPTPEyzXID  
fAmuu9aSFAr5/Pq6DbpG+GoumhRSEor58RzZrlojDOrPDM6YCEXuiWMT7rX7  
kWxqE7IIIAwzWcuSjtUcRFeWftvqoyz0/82hmM8exDq7Bze8aCw0fhqbVncx  
RluhQuzhaBauqbTaz1Qboy5zbrqtkoWD969vjaw2QZusHUVwAxvqAyJdLj9M  
8EdqMFZChQ1xvriz+ tqH4Es5XdBsyMZX08Bp3upDWLazSmQtg43LPbsfjVQd  
hu7QcpFD/2MjerE4zP/7YTyqOTQW0clG4BYZxSNapgiTdim2GmXDIIA/RbjK

FL3yTWaCluEY+fnWJaPyCH7nvC/Jcw7HXvGAuZsVRzH4e3DfzYFwPPnAmjz0  
9Sgq59495fkajiPFp758VTLH4sw/HlsWwuGml/Hv3lxzVM2dU7knFgGD09Re  
uokFKOIHDI6YRSBune+/er4WuGvQkjLsGIGX4QFtwmcsMJQ77WrlGwErsJur  
GizQfcHCOvFkBLzft/n1bFEVhbv1ZySCBRqXahts7HEp5UN/bdrIjCemVFZ  
EGKJD+pldmcfR4DteaPErNQS7XZbExs6IxA/XZ2VudUKxbuF1dfwcHBrw4fj  
09dbo3BNsvZHEw4mOEMRfBrWSBMYvmJmycGu/rGwTnNr1KR33E5z50B+/mzg  
iWRrmCz0/iqlc/CPzirXF0tsUOcl/ks/gQORLBHHLfkbBQOPHUuhQM7HjFb  
hr4NztTaPanP4KC/cbPZBsIGy/a0OFT8xcGk426Kxzc1JwvC9jewIHmQ4qu  
prAt3MqDs4inHHA2G2kJqNoiOEJNtbSJgyWjZqq3abYop3ase9jJwbrjXLLz  
72zRsuPJYPIEB9rZ5xdSX9mh76xtsrYogeLcKc1Xo3Z4Jlft9FSCgGyBXaCQ  
oD3y5DzCKLIEhMqke2KN7PG87Z+XI4oEBh6V1hK19pDnC+4z1CVg+0xksqbd  
HtlV3S/kKQRevmRv+z5lD/5NI0FTIFDVqp/BUHXA+KH+eUsTAkmfX4V65zrA  
KJdRsd2OwOKwRvGNBgdY7rTmZzoSCjvl+NDf64CrRRGUfBcC7rNulo6ijkjx  
/OnW40IAU/Cr2tGzjti599ws04hA0Spr3+QiRyxxo6lqMglli9Rca3zmCLaf  
udr7UAKCElErjXidwGCqnhbiEOhXER7RYTvh+2LV3YJoAtY7Q+VY6U4IXuEU  
03yGQKNWp8PdMiocyT3cIxlPoEL/+nOVUSe0UFjvHJIJFjsyJOjOqP2fd2Y  
cjqBBZv0XrcTzmBUtbAXLxIicZxdl3XFGXopq9c9yyDg6tkQvbHdGVqGxC7V  
KwQ0wsypQoddwJGbmPDLIVAQUcE18XNB+Y3RT//eICB5QvR17BkXJH6Ws9C/  
SUAgr7h2Fp8EFfJfJqkN5BI4nGbEovS7lzp4ZUyogMHW+oISYd8HpoJgGrOIC  
vVyGxPddrtAR3qpTdYuAZVarlyalKzLHLiq+KibwLEcniRHkClf1Jc96SwiU  
Fy3ODRe6Qokv5VpPKQGFUi/1bc9csaNjqXzzHQJZd5/7eX90hZr2hvG7ZQTi  
7qV09Eu54SjzQ5PXXQJff4VHZlDcs03tQrd+BQEHParsUVc3iN1YvU64koDS  
A3X/B1nk/DHnmylVBNIXxIRZ993geolpjmocvym8lSq9buAV9GwaJP364duF

qxLueMrc2LWhlsDuxbpc673u401aqMkmnbsv11jI2R0+BwZ4pevIfj5KGntM  
uENp/avudNJhf4dclK64Iza305ennkAfj702Rr07ysxWvfQifdDAqGe4yx0D  
IVGKD0nfOa186sa8044w9POF7xFY+T4xrWQIFSo5Tn4OpMH7xztBkgoi9WPK  
ZdIsuRAdbxUqoimnDd+QvmUwKAg9Kt7G5WYvku73cOqVOEIFV8fsfwr3CayL  
flU660wFn0T86wOkTXINT7cGUHH4t+0HF9LHH1db34kk5+c3iAeSLv+gpJcC  
TIXU5xfcUNKDS67P+V6lQiiGiPjP4lvWNRkWU5Fm2tkTQNrcKP6a9D0q3st8  
GvjveWe8fjF+vqTiAsUk7yDp2hiGYUc3FZD9bbSd9PjNj+vvjlCx30VOJx/p  
zU/sh879pGjP7NrILvL77T411dFXeODQjhaTAtJjfDh7QNwD3ydyNININ8hX  
uskpeUDGQfWVGumZ/Yo7F3Q980GPwr0v5H4q+mQt7TrkAbtwCiWltGvsmo5K  
Rw90/JBkHCKdlnemMJXugWLjLf6T5Hn9+hxoZpLoAesEITEV0urL3svlZ3pg  
c1TH3N/keXsr2E4tFnogQ7D5jznpV74Ubk2jBzyGline41BBYEI90T//XA1UG  
uu3dZH50CrbqMb54II/ia2tN0mdo1XuF5Z74ra29S5PMX5tAdMUSMU/UKgfU  
Z5H5FFT8Edu/zRP+wn0beUiH0PqVMozJcfPQ7Boy3weGS8P44z0hQzNd00bW  
AyG4xfh9hic2JxkGqJlu3c7d9CDfE3V7tHT8yfoR8496GPbMEzPF+vQOsr5G  
RsyXf+L3QnUFa21kEZm/meHRsvVe2Hg3cbGQrNfchZjXJ7Z44eK2iIBWsp6d  
19RmiBp4gXkwdFoqn0CzluxW0+NeEP5aK5GcS77v1KTB3SkvlHNTVd+Q/WRF  
UtLWKF5vtOjS7zZlEvBNlxc8ssYbMkP04CeXCjk07z5rOqN98kNf98m+1Fq  
099um+jeCBJ/9IaaRq5344XIU++8Yck7sNUykdxfGWV3swlvNFg1tMonkPW7  
/amh+II3Cg/5Wf6II/Bx77xgpbgPbhQ+7k8j+6WNh8flIVsfMLM1JCuiCGiX  
7Kw62uyDhybL7mewCPw0aJmQrPMFy/twoziVgAVdTXDbC19INcklX3Yjkj+a  
tGVnly+UnyyrW+9K9uN3hg4H5n2RU9HOX05EoOR4xaNjun44J9awrN+agFvN  
xYsP6/wQ/cjvrbExgccq9nuo9TSMiQXMaauSeRXtjb15zx9io9gU84MDrem6  
BGZxEG6XexkNxXLgszJx5JEyE44VCuoz4hwe9899YW4PxdWE0pcBBRFgtG9d

uZ+fhWcwn07Ti8Dx13qf68j/oldS0THf2sPxIoGb0fE2AiJPnqtK0MKxwu90  
4Aayz37t459yXRqOZD4hiV9Fx6GzijG75jL5/5VnEXUm5yQqCiqJ6+psHK3a  
znd5zymwzllWvH3Lwp3ZZs1Hu09D8S/P+meBLCQ1vwr/tTUa14TFfkqtYYH/  
9JSC4LYY/KzoGyduh0FAR6ictuUMWC6JQj5HwxATFW3WtToWn9LOvdwzG4rr  
BRJ2UqvjIOqlspJ6JRRanuuYIb/j4LvjxmbNA6Gwkubx2zQYj+CwJ0US0yEQ  
rl/9Iv1jAp5809jLvRqCg18iKTJvEpEel0pxMA2B1I8V0iffjMHPYs7Kwe9M  
RPKndKk1J40QLwmLv8mEdQGzYLL6LLxbfm9f7sBEkyL7fWzVOehPapVeEmDi  
oV6XqsrN8/j0J/TzPw+CoWO101b+bAq8dwx7I7GDUXjTdiZ8fyrWtzkq9ygf  
I2TIwNi3PhWcUc13t14ysFjin4X+ngtIFx8PSdNm4CM34EN2+QUcSVj+raY0  
CCcviXgWKqQhquDewafKQRiOfsm9mpeG1/aMfzVyjuFCXbmdqGQ65sX2ymjL  
HoPgQFHT8ax08Cmd2TDDDCt+eEm1ZPGLGKu2/ZO5PhD3wx9u2px6Ed9UJrM0  
sgLA58C8lyt8CfdLAz+NSgQg8bT1YHHcJWguezdul0+PFuWyP66/LsF6vri9  
R9Mfo0+l/pnnZOAU+4/s9D06Dirq5aUnM3DRZ2+eqBkdtdcFSISnmjBmXjOk  
YkqHeobNLsoMOf7Rw9zwEB3SMRMGLnMZON2oc/7YATp+umx2v8LDhVUB98VT  
Ch131yRlblzLhbFFheYJNTrklxxXC2twofDgVqPAGjquBuVfktbkwi07sVhu  
NR0iPtOSatpcSGlTKvaupIPH6pyy2R4u2g+L7gxeTkef8iOTZEMu7tmYDHbz  
0JHxTjFGWjql7oOKmjXfaFjVwVohasvFEkNer9avNjxpfnxBwZ4L05+nq7+O  
0xBS55JzwJmLL16MjsURGo6mpz6I8eJc+mNxSdYHGp4m9u1P9+GC357FUz9A  
g94ppeZcPy48B95EdPbToHTsSfejAC5aN+/qF0mh4YbXWs+3x7i4ZK35QL2L  
BjEnt+EBBrm+xPvPj3bSkGpRHDzJ5MjpsfFHYDsNAsZzs4uhXAhN2R1ObqXh  
/9txCeI=  
"}],

{RGBColor[0.560181, 0.691569, 0.194885], AbsoluteThickness[1.6], Opacity[1.],  
LineBox[CompressedData["

1:e]wVzX1cywkAx/Gh6dQqOimplSiIC0me2vYtI+6UHpBIKBPRatKKSs/Pz6vt  
V/1mIqnkoYRZ0ckpelC4U6JYlBAdCrsi5/74vN5/fmb7BLpx]1IolJ0/+1+7  
4c6Pfc0Km1Lmt3+R0SfW86z+yneCHrZuIrOMq7jPjrprGHx08J59aNeialFx  
L7u9b8WmdMF3tj/XMVYp/cj++ukOJ0KggR9NFp7v8iYiw1Pef1o4FUHRRjo6  
llSckGuWq/tr46CWLdYlXRV/HpEv7NKbgdJ7HZviHDSgPqrJPCwwRLqrW4GI  
Ox0G2/ZQnjoZ4UWPRzBtQAe6Pd29RUJjJlmeNSh4urBgWpeo+ptAmNnc4ZCj  
D6fv3ZaP9MxQIk0LWJ5lDFGk9YogAQMDrbbfbxbPg5TRU2jqY4UITzY5rhSa  
40xP0rcOp4WINHntszzOAt3SoedS4SI0XL+sOH7QEkPjq4up/tbQq7laR/Na  
CO0/hiz+0rNFw54Ld5UPl2Abm7OMJ2Ai6oYi9XSnHayS5ksXf2EiL3BGqEoE  
ExPbp1I/h7CglXzcuHE2CxXePQ/DQ9iorKgYzOexMc5aJePUANfrteV3ptjD  
xftvNze5A6SV1sSEW6sxIpmcGiBbi0fKvpNFh9djlf4BZXG1M4yfhyXuaXOD  
rTTze3bbFnTmhkR97vdGYm1WxzNDb3BaTPaTaVy8fbvxlz6qL1YoYdZocRCj  
9g+HDOR7Qc1UDu4w5SNvtzuhuNYf+r9V7uzdexhLh+XJ/AoezhsWjTpkhJLL  
S3lbb8nHedeRd7VBRxH0TPmabxGMieZnx+riIxH4aC6NQw2BgcHV5gbLaES0  
2/XL0wWQGdU/ME6OQVMyle54EAa/6vzWzLFYqPldPKhz9ij6LKZ7zHSJR5qK  
+qyx8gi4eze/v12TAP0Sl6j4omPYUVpYvFsvCc5XLFTyV0bDxnb8YsvWZFz8  
2mpTvzwGQYztpWsvpCC1tS10bG4sWAEIk3kDqaDGfDKbMi8071t9DZts0qG6  
TL1qn2k8QrrGE0wFGYiLinXq0kx9Yb09XJJk6UztpiqJmIK+7dvJSOLCz1  
+ZV/6FsinppU2C4Oz4Ybnel381USfhfLdAapOdCq0WzKfZkMe5Zwa1tBDta+  
Dmca3U8BnRVstG+2EIZf10jH7qfCvTFIV0uVEOHUrC6r1jS8KA65MWaXC/dS  
fumHq+lgBqgvy7qeixZzQW/ClQw4GrEmRHPyUGfXxVhQnIkSj8SWBfV5W0a2  
eP0c9CzMGGSXbV0hQlnx5pFQTjZMLjd6RMpFODRg77i3JhveZXPnKa3EoM1i

u7BW5uDY0lih3jkkXhIHxkirchCm+GLcSydwTKTtU2YmhLB89Hh8BoE3sc0E  
WSLEiCiuhD8pHznyqi26BrlwmdCbmReYjymK8pYISS7uz8oSX36RD06SgVWa  
fh7og2qCi64FuB5aN9MkOw9rtMed/WUFUNnKrz2lJYLppLPvW0wLkRLj/qoi  
UQTh4x2HbZIK8dCycnzHmAj81yceUQcKMdhge0/fl2Ksa9YfZjiRsC+vmUP/  
IEZ924Z/Os+SuHZC9RzjkxhTD/hkC86RWCTetIQ5IkZomYa2zgUS9Lghey+l  
GEcSrWSuVSRGvUx2FlIItDl3JzjSFyamlowYxqBPtq336tvk5gT5qmpZU2g  
2ujd7sBnJEjeGRHdhoBrx0Z9NQUJbe6wgZUtgTCGqPp0LwmKW4al00oCLsy2  
5K4+Ej2W9evSHAic97Grsx8kIX5uHqfqTmDpTQMPmpKERkeImu5mAu6RMnrJ  
vyTiW2/lmHn8/D3xvMMcl3FI7lW0ZjsB8y91tbxxEs652TfifAkcadywuF1F  
goaUHk4ulwBvmDvBb7lEdtHzW0/5ESBpBZfGVSWYH3D7Sf0BAiNeW64x1CU4  
6TvN50EAgWb00xpoEuht836jCCTA8cccvDQlyHapCPrAJxC8MNBzWEsCVUfl  
1x/BBD6+4rmmTpPgP3buwSI=

"}]]}}},

AspectRatio->0.6180339887498948,

Axes->{True, True},

AxesLabel->{None, None},

AxesOrigin->{0, 0},

DisplayFunction->Identity,

Frame->{{False, False}, {False, False}},

FrameLabel->{{None, None}, {None, None}},

FrameTicks->{{Automatic, Automatic}, {Automatic, Automatic}},

GridLines->{None, None},

GridLinesStyle->Directive[GrayLevel[0.5, 0.4]],



Method->{},

PlotRange->{{0, 1649.95765}, {0, 2125.396483}},

PlotRangeClipping->True,

PlotRangePadding->{{Scaled[0.02], Scaled[0.02]}, {Scaled[0.02], Scaled[0.05]}},

Ticks->{Automatic, Automatic}] \) \!\(\\*

GraphicsBox[{{},

{RGBColor[0.368417, 0.506779, 0.709798], PointSize[0.6], AbsoluteThickness[1.6],  
EdgeForm[{GrayLevel[0], Opacity[0.3]}]},

{RGBColor[0.368417, 0.506779, 0.709798], PointSize[0.6], AbsoluteThickness[1.6],  
EdgeForm[{GrayLevel[0], Opacity[0.3]}], PointBox[NCache[{Scaled[{Rational[1, 2],  
Rational[1, 2]}]}, {Scaled[{0.5, 0.5}]}]}]}},

AspectRatio->Full,

BaselinePosition->(Scaled[0.1] -> Baseline),

ImagePadding->Automatic,

ImageSize->{10, 10},

PlotRangePadding->None] \) blood

\!\(\\*

GraphicsBox[{{},

{RGBColor[0.880722, 0.611041, 0.142051], PointSize[0.6], AbsoluteThickness[1.6],  
EdgeForm[{GrayLevel[0], Opacity[0.3]}]},

{RGBColor[0.880722, 0.611041, 0.142051], PointSize[0.6], AbsoluteThickness[1.6],  
EdgeForm[{GrayLevel[0], Opacity[0.3]}], PointBox[NCache[{Scaled[{Rational[1, 2],  
Rational[1, 2]}]}, {Scaled[{0.5, 0.5}]}]}]}},

AspectRatio->Full,

BaselinePosition->(Scaled[0.1] -> Baseline),

ImagePadding->Automatic,

```
ImageSize->{10, 10},
PlotRangePadding->None])      liver

\!\(\*

GraphicsBox[{{},

{RGBColor[0.560181, 0.691569, 0.194885], PointSize[0.6], AbsoluteThickness[1.6],
EdgeForm[{{GrayLevel[0], Opacity[0.3]}]},

{RGBColor[0.560181, 0.691569, 0.194885], PointSize[0.6], AbsoluteThickness[1.6],
EdgeForm[{{GrayLevel[0], Opacity[0.3]}]}, PointBox[NCache[{Scaled[{Rational[1, 2],
Rational[1, 2]}]}, {Scaled[{0.5, 0.5}]}]}]}]},

AspectRatio->Full,

BaselinePosition->(Scaled[0.1] -> Baseline),

ImagePadding->Automatic,

ImageSize->{10, 10},

PlotRangePadding->None])      gi
```

```
(*-----
-----
-----next mouse*)
```

```
vn=readTac["C:\\Users\\exx\\Downloads\\OmeM8, liver 1.614625, GI 0.40325, ID
4218.csv"];
```

```
Lv=1.614625;
```



{0.9098736039718, 0.02121659675083076}, {0.9999999090909091, 0.10024804094746914`}}},

{GrayLevel[0.55], AbsoluteThickness[1.5], Opacity[1.],  
LineBox[{{9.09090909090909\*^-8, 9.090909090880112\*^-8},  
{0.0874367476365131, 0.08090369567458766}, {0.18222810297558026`,  
0.12746559200130417`}, {0.27073779576926765`, 0.1116266937044405},  
{0.3575112797365835, 0.046963725126600256`}, {0.4516394623155443, -  
0.04509050859182233}, {0.5394859823491253, -0.11115559892361665`},  
{0.6346872009943513, -0.12642564594664163`}, {0.7281522108132057, -  
0.07740196037964171}, {0.8153355580866803, 0.004179083230780074},  
{0.9098736039718, 0.08937493944143977}, {0.9999999090909091, 0.12834702174618903`}}}],

{GrayLevel[0.55], AbsoluteThickness[1.5], Opacity[1.],  
LineBox[{{9.09090909090909\*^-8, 9.090909090875369\*^-8},  
{0.0874367476365131, 0.07984396759533968}, {0.18222810297558026`,  
0.11939549826670079`}, {0.27073779576926765`, 0.09184904274707059},  
{0.3575112797365835, 0.017913117173780694`}, {0.4516394623155443, -  
0.07109962300031061}, {0.5394859823491253, -0.11717052830989395`},  
{0.6346872009943513, -0.09879571259704382}, {0.7281522108132057, -  
0.022693471356141894`}, {0.8153355580866803, 0.06128703302641453},  
{0.9098736039718, 0.11605625481609519`}, {0.9999999090909091, 0.10415981267620744`}}}],

{GrayLevel[0.55], AbsoluteThickness[1.5], Opacity[1.],  
LineBox[{{9.09090909090909\*^-8, 9.090909090870287\*^-8},  
{0.0874367476365131, 0.07879243663407876}, {0.18222810297558026`,  
0.1116081822210312}, {0.27073779576926765`, 0.07372482040530459},  
{0.3575112797365835, -0.006267252216927747}, {0.4516394623155443, -  
0.08743897872291118}, {0.5394859823491253, -0.11109134853087661`},  
{0.6346872009943513, -0.06371549528296311}, {0.7281522108132057, 0.02544576624054603},  
{0.8153355580866803, 0.09464282937855747},  
{0.9098736039718, 0.10731931496853601`}, {0.9999999090909091, 0.0516787429232188}}}],

{GrayLevel[0.55], AbsoluteThickness[1.5], Opacity[1.],  
LineBox[{{9.09090909090909\*^-8, 9.090909090865543\*^-8},  
{0.0874367476365131, 0.07774905743802465}, {0.18222810297558026`,  
0.10409673959866513`}, {0.27073779576926765`, 0.05716133039337165},  
{0.3575112797365835, -0.026084496726167965`}, {0.4516394623155443, -  
0.09591154799603378}, {0.5394859823491253, -0.09685594593277226},  
{0.6346872009943513, -0.02730376120671303}, {0.7281522108132057, 0.061646715198529656`},  
{0.8153355580866803, 0.1046634148537508},  
{0.9098736039718, 0.07509702498429204}, {0.9999999090909091, -  
0.006536873471333553}}}],

```
{GrayLevel[0.55], AbsoluteThickness[1.5], Opacity[1.],  
LineBox[{{9.09090909090909*^-8, 9.0909090908608*^-8},  
{0.0874367476365131, 0.07671378556951527}, {0.18222810297558026`,  
0.09685439581479163}, {0.27073779576926765`, 0.042069810325321415`},  
{0.3575112797365835, -0.042006785469922474`}, {0.4516394623155443, -  
0.09808544986431629}, {0.5394859823491253, -0.07760167026270944},  
{0.6346872009943513, 0.0063643674428021085`}, {0.7281522108132057,  
0.08405712128907425}, {0.8153355580866803, 0.09555213349985489},  
{0.9098736039718, 0.03202960165577907}, {0.9999999090909091, -  
0.054402034659985464`}}]}],
```

AspectRatio->1,

Axes->{False, False},

AxesLabel->{None, None},

AxesOrigin->{0, 0},

Background->GrayLevel[0.93],

BaseStyle->{FontFamily -> "Arial"},

DisplayFunction->Identity,

Frame->{{True, True}, {True, True}},

FrameLabel->{{None, None}, {None, None}},

FrameStyle->Directive[Thickness[Tiny], GrayLevel[0.7]],

FrameTicks->{{None, None}, {None, None}},

GridLines->{None, None},

GridLinesStyle->Directive[GrayLevel[0.5, 0.4]],

ImageSize->{Automatic, 28.4375},

LabelStyle->{FontFamily -> "Arial"},

Method->{"ScalingFunctions" -> None},

PlotRange->{All, All},

PlotRangeClipping->True,

PlotRangePadding->{Automatic, Automatic},

Ticks->{Automatic, Automatic}\) Expression: {Bl,Li,G}

Parameters: {k1,k2,k3,k4,k5,k6}

]

```
Manipulate[Show[ListPlot[vn[[1]],PlotRange->Full,PlotLegends-  
>{"blood","liver","gi"}],Plot[Through[model[k1,k2,k3,k4,k5,k6][t]],{t,0,1500},PlotRa  
nge->Full,PlotLegends-  
>{"Blood","Liver","Gi"}],{k1,0.001`0.2`},{k2,0.0001`0.1`},{k3,1.`*^-  
6,0.01`},{k4,0.001`0.2`},{k5,0.0001`0.01`},{k6,0.0001,0.01}]
```

```
Manipulate[Show[ListPlot[vn[[1]], PlotRange -> Full,
```

```
PlotLegends -> {"blood", "liver", "gi"}],
```

```
Plot[Through[model[k1, k2, k3, k4, k5, k6][t]], {t, 0, 1500},
```

```
PlotRange -> Full, PlotLegends -> {"Blood", "Liver", "Gi"}]],
```

```
{k1, 0.001, 0.2}, {k2, 0.0001, 0.1}, {k3, 1.*^-6, 0.01}, {k4, 0.001, 0.2},
```

```
{k5, 0.0001, 0.01}, {k6, 0.0001, 0.01}]
```

```
Clear[newmodel]
```

```
newmodel[k1_,k2_,k3_,k4_,k5_,k6_][i_,t_]:=Through[model[k1,k2,k3,k4,k5,k6][t],List  
[[[i]]];And@@NumericQ/@{k1,k2,k3,k4,k5,k6,i,t};
```

```
fit2=NonlinearModelFit[vn[[2]],{newmodel[k1,k2,k3,k4,k5,k6][i,t],{k1>=0},{k2>0},{  
k3>=0},{k4>=0},{k5>=0},{k6>=0}},{k1,0.008`},{k2,0.0001`},{k3,0.0014`},{k4,0.001`  
},{k5,0.008`},{k6,0.0001`},{i,t}]
```

NonlinearModelFit::eit: The algorithm does not converge to the tolerance of 4.806217383937354\*<sup>-6</sup> in 500 iterations. The best estimated solution, with

feasibility residual, KKT residual, or complementary residual of  $\{9.70301 \cdot 10^{-12}, 0.0000838052, 2.40127 \cdot 10^{-12}\}$ , is returned. >>

FittedModel[newmodel[0.0100986,  $5.86338 \cdot 10^{-13}$ , <<22>>, <<23>>, 0.018367,  $5.86338 \cdot 10^{-13}$ ][i,t]]

{fit2["AdjustedRSquared"], fit2["AIC"]}

FittedModel::constr: The property values {AIC} assume an unconstrained model. The results for these properties may not be valid, particularly if the fitted parameters are near a constraint boundary. >>

{0.93991, 990.246}

fit2["ParameterTable"]

FittedModel::constr: The property values {ParameterTable} assume an unconstrained model. The results for these properties may not be valid, particularly if the fitted parameters are near a constraint boundary. >>

|    | Estimate                 | Standard Error | t-Statistic              | P-Value                 |
|----|--------------------------|----------------|--------------------------|-------------------------|
| k1 | 0.0100986                | 0.001866       | 5.41192                  | $9.32969 \cdot 10^{-7}$ |
| k2 | $5.86338 \cdot 10^{-13}$ | 0.000636393    | $9.21345 \cdot 10^{-10}$ | 1                       |
| k3 | 0.00124082               | 0.000188736    | 6.57437                  | $9.18804 \cdot 10^{-9}$ |
| k4 | $5.86338 \cdot 10^{-13}$ | 0.000309268    | $1.89589 \cdot 10^{-9}$  | 1                       |
| k5 | 0.018367                 | 0.00363929     | 5.04685                  | $3.76309 \cdot 10^{-6}$ |
| k6 | $5.86338 \cdot 10^{-13}$ | 0.000218623    | $2.68196 \cdot 10^{-9}$  | 1                       |

Show[ListPlot[vn[[1]], PlotRange->Full, PlotLegends->{"blood", "liver", "gi"}], Plot[{fit2[1,t], fit2[2,t], fit2[3,t]}, {t, 0, 1501}, PlotRange->Full]

]

\\(\^\*

GraphicsBox[{{}, {}],

{RGBColor[0.368417, 0.506779, 0.709798], PointSize[0.016666666666666666`], AbsoluteThickness[1.6], PointBox[CompressedData["

1:e]xTTMoPSmViYGCQAGIQDQEqDhP/PuLo6EpzgPDtHOas92BSflYP5Xs6PFt8  
zbX6WxmE3xDo8JbBTu+BKlR9Q5jDpATW4BX7o6H8aAcndemC7lkhEL5DgoP1  
qwfuk4wCIPwDSQ62S+dMUUpjmA5VPdWhNEF6oleYOlU93uBd8z3j7RjeofJbD  
ao1yJr7/LlD5HIeFO1hi0qOgflD8B91Dj1YJznOC8B8UOGx4OvV17hooX6HI  
Yefves+MiVD+ghKHHI8rnXZ8dYDwEyocVrfcTXuQagdVX+MgM+Ov2Wxf6h5  
9Q6Xn1Sv9Km3gPAvNDp82qnTmXDVFMIvaHdInZH25/MxQwg/Y4IDi8S8DeoK  
OhC+xFSH8NRt0/q/qjsskNK/q3JipsOyqc/TVOpVHABJsXVS  
"]}],

{RGBColor[0.880722, 0.611041, 0.142051], PointSize[0.016666666666666666`], AbsoluteThickness[1.6], PointBox[CompressedData["

1:e]xTTMoPSmViYGCQAGIQDQEqDt8nG9r5CLk5QPh2DuWnjyR/9UqG8j0dshS3  
ixqeL4TwGwIdltUW129lr4LywxzMNz2c75FRB+VHOxyYf2GhUG0DhO+Q4ODU  
zCxw9kYjhH8gyeHJfxftj1NUPIUh0ZGzbBPos1Q+XSHg6Yy1nuroXyHLlel  
qhPvPZ7C5HMc/tcq2h/jb4HK5zvs/H+ipEITyn9Q4PAn5dqCk4oX6Hlgcns  
2hZGASH/QYmD+p+1Pxj3Qs1LqHBQy1x8//E+qHsUahy8F5RLLlkJde+DegeL  
Xo985kqofy400mzxWya96TTUvwXtDm+fyH6c6gsNj4wJDufl5Cpezy6B8CWm  
Opxel/XfcnqBwwIp/bsqj2Y6aCYyLg9KynYAAGywdoA=  
"]}],

{RGBColor[0.560181, 0.691569, 0.194885], PointSize[0.016666666666666666`], AbsoluteThickness[1.6], PointBox[CompressedData["

1:e]xTTMoPSmViYGCQAGIQDQEqDr4Tg5fF/RN0gPDtHE7sNd4pszYEyvD0WK8V  
lvE7IwPCbwh0mLq0J09YsRDKD3NYabJXflNgKZQf7bBuQWZnqFIFhO+Q4KDd



6qA30awSwj+Q5NAfrd6ZcKMKKp/q8Paeg3nW+mqofLqDSzWbHCdPHVQ+y2H2  
Cz/ulyINUPkch+1zvAtT7zZC5fMd2F06tLdnN0P4Dwoc+M/5XD2U0wrhKxQ5  
vGXlPhPP3A7hLyhxKGRhOZdr1Q3hJ1Q4/NzrWy9mOBGqvsZhvbOp6s8lU6Dm  
1TtMD1+3fW/6DAj/QqPDrv1Vd8JPzYbwc9od2uQMq76FLlLwMyY4RG9hyF28  
ZDmELzHVoYb79bHLR1Y5LJDSv6tyYqbDlsIjUSb71jgAAEfNc4Q=

"[]}, {}, {}, {}, {}

{RGBColor[0.368417, 0.506779, 0.709798], AbsoluteThickness[1.6], Opacity[1.],  
LineBox[CompressedData["

1:eJwUV3c8lm8Xly2ysiJaEkLICl33Sfbz2Hv+7J29997rGUZSqawopKVEjBl  
SZmpZGZEZSS9z/vX/Tmf+zr7fM845uRn7EpNRUW1TUtF9f+v6saHHwFsVFgT  
3P/J63AFPuV9a/geOoIVf9zwGqe9AnFdgkF3QpexF93PN97UIMDbmXOm2aF/  
sQbF9GCFncuwud6pHh16ACyMnuddqSwG5h3W88GhglDgFnliU7YQDlu7UI3r  
HYG8zOdOefMFwDs58bmMeBS+yf0dzbpeAGLnZSsYvI7DlGZvsxV7Aej9nTj9  
nk8EpkLc/u3skqAgRvacf6gk9Cy4BT/8R4BrkpMlJ5ykwDRP7l3TKwJUTqbt  
juidAefL4aLj6QSYuLby6RpRGtaE55w9uAiwsnfxFp2XLNB+kvA6Ip8PnM9X  
xN7xKYChYvIxG+kc40FtH7uTqwBcdHP2B99mg4Df5axUWkVIOlr1lc0vG4SP  
qC+fW10Et0LNae2NWaAQd7mhrPMcXL4/ylmjnQnWmLqib+h5GMF5a/2tSQOp  
NPFrMr/Pg+ri50spZmlA/Zad7lclgo/v9LjV9qVBrf3kUFQIBt9F5va0bFNh  
D6k8Vn8KoHFXO4T9aAoY2g8bGz9Rg4SA3BSO8URQTtSil9tWg4/+k5o7hYkg  
XPn0Cfe5i6DbS/f3o0kibC+XHR1tugh1xxakvAYS4GbMpZX/mtThzTdPk+jh  
ePhZSp956bEm3Mqw6kHMSTD1IuK8waYmWPxNn3h+LQa6Zr6vSStqwXSD84eu  
szFwVeKdxc9HWuD/SpbGzikaNJ9dPxn1SBte7v9UtDkQCcXjSi/TH+qCBY0Q  
c9BqGCT+qw32+qULAoGfYmkvh4HPiSOieHkcdAoaHHxzMQwueNPlsT3EQexp  
GdHN0lBY3Bm0LXyAB1SiSXvaLgRU+L23bt3Xh47b3RWIHEHQ/iVktWdVH9Y2

DkRoDwYcvjZ+flXcABpTff37CYFgr1r4UeWmAYTSxNhbcAfChXqHCU9tQ0ik  
ulluKBIALoNzZ/YpGsGpyOJp2Y++UC1PaBo2NYIj4SISiv6+sHy58EFVoBH8  
Y1u6Ec7kC6FON+7o1RnBxzvxQ6fgEqRtPCq9fNIYwuvtx6VavKGG+0u0DJcJ  
xNbIXlFc94CViLlwWlkT2Piq94Htmgecnfoe/MHABMx99jppcB7wrHLTJybl  
BEzXjmRIV7tDv+IBu25qU/gY4PHxnJ8brFkpnXf8YQoyN7trtiVcQK71/Dk5  
NjNQ+OOyszDvDBHHL8ozSjPb6ZU5vhcVzkC9pCd518MMYiRi4jm008PBaGfB  
7U9mMBBzf2tD2AkUruX+zX9jDuchW05pGzIA7c11uTdL5rA8wGdgIOAAR6vM  
fZiZLCD4T3AkR99/wNwgnJ5y0QLC26s70P/Yw/TLuqbIjgv407rcxexpB5nf  
3gS53LQEprWRtwIJ1vBvQbb2xnNLYP/0Sc9fzBqCVwq/TE1YQj93ws/ZISv4  
b9PeyIrXCvJ6UqkKxKxAjmlVSj/bCtwSw3/f/WIBUxjsi4qh1pC9dVIuOtUM  
TGSCjoWQrOHXiZhaHcwMuuQ/WDY2WAPb/L8m6m1Tul+ud0osWUOxTfe8uJ8p  
pBueqTjmYAMXxfjt/7magGywgQOzri0czP4RahhlBFXh94u03W3BdP2gRcwF  
Izgcw/s2JdkWimg4LDwZjYAh9dN5que2wHH0kHFIsSFMFPkj/DprB9eFKhcU  
Eg0gtTlvZEqQEodgmyQZVzys/gmLKjxvDytNuoV2/3BgqepwVN/OHpzGNk5t  
luBAvEXaq6XUHujLeIXtR3Thbevg3ysC/wH9zsc+bzsdYPmcQbzD4gAG0sJ1  
ftWaAPv2XNIP04CC2a1TZyw0IeRYoKKLhAMQfjMQOBg0YcrRekIA7wD+TC2d  
Z7w04N4XcZGsLAcw0uhudTuvDuYzvU889zsCH0cv5selBpm0kK3B7wh6c/eM  
L7+7AM+FH9gfE3cE2QA5wTukCyDqWkozquMI714pN8TyXIA/33z0tDMcweLl  
nYvRlGBlcwc+izA6warEbFDcmCoMMYtEp+Zzgp1RVXmGIFVgEv2dMnXKcCLs  
pML3HVCFQI8p8UItj8ic/zl3TkMFNBbqgunSnCDbI3FD5vU5WFW0YJyhcwbN  
qKYienpF0Py5sNTA5QyBYdNBq00KcPNv0tuYE86Qs8x9Z8xHAWzYmwp5LzjD  
EcjIrvkgD33yR0/iop0hq+n0wkCTHNTFr11oXHeG221f6+IrZWF/ZubJuH0u  
cMUwOZHvQxabcSMJMeHYXKE/ZOnNJXBaOVFoOfjN0AVrea0LEezKQ3/vC/pCn

C2zKrpif7ZaGQB5CVPwnF/ARbMCdV5SCN0dO/6e34gKyVgsV7EOSIC7Wocb/  
1wXSDhX9VPCVhK8q20wP+F2h5u4vJu8aCTB1dCyeM3OFkj4Ng02Z06BwR+ah  
fp8raM6I0+5GiALxYW+xwLgrFF5k2WMQFYWVVtfo+QXKezEIE/lwCqoGL19M  
ZHADz4mClSylU8C3uW/ooZobSCvd2ypgEIGdC0Mrh5+4gXVnx8Tbdyfa0FOK  
6VS3G9AtNZvPZZ2AyzMEzKjbrD7+nQEjcYJMPmkZqmx7QZOGnqXVZ4ehzvR  
919eOucO52rdg7QbjoH9YzK59Yk7KBWmqd/I0wIPptbqurrdQfpy+5PTgkdg  
P71e99CoOzBSG2ab3RGCx6Z0e7Pb7tBxafIP71tBYF8PcWdT9gDH02GB3KKH  
oU3CQtnhqQfcXexmzhU6BHym9029ejwgJXP+ZPArPvCNYvMLHvOAA3bHC8o9  
+UCgp/NW+o4HHLFcCBh6wgvB7koH7il7gszHAcEZDx4QuXloel+zjzxOIVey  
7B2E606QHeZeT3jhXVKZ9fAgDK0NcvGMe4J+8tQjDt+DEIdl6oj/8YQx1uMZ  
J75wwseJnUZjFS+oF+yL3HzPAZm8Eym3mr2gqqkq8PMQG2znzrU49XpB4i3/  
+RxHNvCg3/h1bNwLql+e/tn/gxU0fjG5le14Qflh4sENHlageqeoefWcN3xv  
G7Q9F8QCIbkk+qLH3lCknCAr5McEM3TXkXmnN1gJyPZkczGBcUxNKPcHb5gz  
TKFBzYwg7fNylvTbG97ZLVeZsTDCos7q63x5H5iuv1E89YweHOHwaZn3fUC2  
9VBtnwktvlk2f67zygeGaA/c8GSmhfm/HTcZ3/nA6ukAW8Z2GuD/Gu6etu4D  
x0lHdM4r0cD7F5VayTKXwIdJcJ+wBDXoRlMzxtZfggv5Ns9+ISp4snEAzj+/  
BN4+iYcO01GBqPeh8N03lwDkww8fK/6H0VlLz0euXAL3vbVb9U172AtF+64w  
SV+4Wht36xjLX0x+40l6QK0vpOttTr7b3Mb6TJYGjz31BbuUIUi7sY05PTgs  
MNRfmZsu425W+G0sNyTuruysLzxvH6rAVWxh85vqQxtH/UCoZjqfxmUTK9I9  
KxBa6Af9YZ159Ry/MGm7fa4iFX6Q/l3atrb3J/a6RbZu5L4f8KY1M+Sn/sQ2  
YgtAcDAPxF1wlQz/NrDK+Luyu3T+YCSiXGu9s45R0QRZtIA/8NeTlU7x/cBw  
95mjubX9odvnFcHy0xpW6FxedsnAH76NTbtrVq1hEu3vFwTt/eHLu3B5/XNr  
mFWKUnRslD+E3jxdV9q7gjUy7JVhj/zB4bH+5smWJezv48KOohZ/aL44tfzb

YQnT9jizuNruD/Or/0J36JawT100Z8ve+QOz+r+kDJNFjCXzVQfVD39QPs5t  
b7U7j7myZCy+PB0AgsutvTEJs1hdb2JN09kAeLFwdt1Pehb7nRntVa8SAIPb  
egyp09+wVCb/xVJcAFh7DbezqH/DKuktFs08AwD3kcuHh28Gm6c6uShZGwCk  
zSs5o2ufMekXQjXC9wNA/Mv3epWGz1h4HJ+XQHMAjNM33kr1/4wx7jEvMvZS  
9KlyyPVsTGNif9YXvi4GwPyBS+51tNOY168XC5fFA+Gu67szcSUTWOODp7fz  
ZQOB4eLjwKizE9h00APPNOVAMBrvubPYP45lrVctBOsGAjKiF2NhGMfurOYu  
GHhR9izuxYiBjFFsecF2ga4mEGQL9srP9Y9gCrfNb+/eC4Rhg+Q/h6JGsFgP  
Q8+NJ4EwWymMHRcfwVjnLi5MdwfCE3GCaknWe0xqRnyheSEQLmULfnxoM4z5  
T23NB4gFAeeRu7RkKkMYnpgi81k6CHSe/+46uDaliWpyRhoqBQHtH2eJlvuD  
2PTd08xntlLgVtgD/0vnBzHDGHvJ7y5BQJfj++aP1QAmfbg9wK2MIu+y+TEr  
736MZcDw6fuqIlhdKHV2YuzH5pMmqTXqg0DLqEK9qbIPK1v6TTrRGkSZ3zQW  
5+Z6MfZmsUfT40FQ/IBY4XBYD7ZmlbdjzRsM+JLbwUNvOrG+A4cv9ggFQ7pb  
83ZzbCdW/bl665xIMNRxZj+6f6YTcxBr08wnHwz8w0uhz8ivsYGtn+i9MYV+  
KPP4o1ch1lBknWSQGwxctoE1euqvsGzcXG9rQTCw0opejqV5hXn8C+KSuhom  
hmH59zJetWFH3XMqWO4EQ9+iUPRxzTYsX+FFZ3c3hd+oL+2A2UvM7/1JFnW6  
EFiikmBhO/Mcs5Tj/JrDEgIXhrkmFbpaMchZefrhYAgSImXNe06tGLvGY0/v  
4yHgZOH4MftKC9bwQLuTiIWAy9RtnO/hZ9g6yTvxc0QIfHo3N2xm8QQbW31r  
dTohBEqIDYYvaZ5gbTg5mZD0EMh4uxYA95owEs3fT4xFIdB66i2VD1sTJheU  
e176QQjls3S+4/v4CAs1vrcVuxlCjkPOgx+LHmD2ddwDXb9CgM1FPHfZ5AGm  
uT+yivNvCLSn+Gd+YX+A8bapmVcyh0IA3dV7jjn3sSaZ4fv9oqGwf0Jbj3N+  
I7bNvul72DkUhDRi0nmfNWBffGw03bxCoWRaLGo2uQHR6Xou2BAQCsxvM556  
6zdgJfHpfRfjQ0FAJHNbqLMeU147J059NRTg9BfLH6frsOi3qt+efAiFqYmi  
3mHZWsxRmdry5qdQqDG5Lpo3WINpVnT2ZM6FAs835amKgBqMI8q4wWYzFGSY

NSSGH97GKkU8ov7yhEFtpzChWq8aextD4rhgHgbuoZf6rB5XYA/mLZPF7MNg  
fB/t4QbPCqzERGiTwy0MeC7MqR0WrMBcxG5PfAkJA0L5y8KTaeXY1nBrVXJB  
GLgobs/kud/Cjkssnu8aDoNptsT5dvMbGENRfUPDRBhkNRxqau07gX3fF3Li  
8kwYJDyl/nN1vAx7/OEfo9fPMOC+MNzxybkMwydxDzNzhQPpRJFQ4u41LHQM  
vAxMwoErQ1NjqOEKZqNBP6loEw49RBU2Pr0rGDT0Ghx1DoeBoKM8QUslGHOq  
ufyPwHA4X+GTrixRgpXJ+FCRiOEwa5J3Lr+lG0tOLyocGQyHD205Yw4ChZja  
/CpBcTQcDHtM5/IHC7BnWto5xdPhMBEuJfo4vQCro99Osl4Nh74v0cpj22SM  
mGwdMMUSAe9yVAxF5kiYdbwgfYrAlre5kflRGwd59CtLQMIqDvlbS8Qz0B  
w2Nv1KrNI8Alh/qGSTABQ3ux57xcI0C5jXQnjYqAHY+eFlIjICKy+8zPx3L  
xxbDbu373RIBj5yNUg1YcjDnD392zTsioEkoSdW4NhubUDDdetwXAYeNAz4U  
47KxN79oVyPGIyDe17/gc14W1hjkNvF3KwL+kUNPrYlkYpF+Yo/p5CLhh/TI  
ZGxWGrbxJqHRTSUS/KqY0j6rpmE+UmN309Uige2SxQfd1VTMfjmzPMMoEgxi  
y+SELVixNe/vhAN+kbA2E2tWIJuC7Xev9+GuiYRzY783yNxJWPx7Dxruxkj4  
OJmdkT2QiP2+eLyE62kkuLWm8MZmj2JfjhZ0HuyJhMt1uQCQyL2dCzy0Odi  
JNiZhXTOMSRgXvqaH1nFoyDx8k+GHNdYbPrZP19W2SgY1r53uGQzBjM//YSO  
VTkKWB8JpctnxWBqjBjnd+hGwbXz3W+pHkdj/G0cucxeUbAimiWA0xqF9chP  
XmSsiYJ6fxsXTvlwDMoLxxgao+D4kZOvkibDsEechgEMT6MgSXdcUzYtDLu5  
2naNvicKvqV7XJCbCsUib1dv0y5GwYj/4yhcsQgmLhhcv088GrocW4RUtIKw  
sixJzX2y0fCOiiiasC8I49mZnaBSjoZqnHvsq2eBGPUHq/1UutFgvsL7XVIh  
EBvLx1z3PKPh2vE5dgW5ACyLllngz+1omFFeY69+4luxCpTC+3vRIMizWnhV  
yxfLl5F0q38SDRfEVI9xT1zCyPYG95y7o+HDvqKQMKZLWGkTSatvPhr+0F35  
HBrijdX5HA6+eioGZHRq/8jmemDSSXcvh52JgYOllbf3FDywxsvouZFiDIRg  
ort70+7Y49c0++m1YuCF/OGGHCV37MXRijftxhIVBxkDfvlig0NS/ZjFTHg

oNkWx3vLGTNdal0/dDcGul++870xc8ZG9hny/XwQA14yx9gK+ZyxcAlA5+r2  
GLh2ctr9C8EJm0l/tM0+EwPuRK+xhDxH7LcqJvLleCw8cPvy0MbjPyzcZAD3  
TDwWLPfjP3+3ZY/teDoGFMrGQlDt6sORTHvsX2HSM121WJD3XHnkdt8OY/zR  
aXzfMRY+4CRERHhsMf4Kw7jkslioG1d+OyNohUk3BEt+qIqFi05m7+70WGKa  
zcXjYvWxQPuA53B6uCUWODit+LYlFhwsyT88PlhgPX/91w6Nx8JuQNtw6A1z  
LNKc4FjPHQdDDGwaTC6mWL7jQzZqwTi4qJDzK+KoKVbpM9piKhwHampdxJ5J  
E2wo8Rj/jmwcpPIOcf6zNsHE6+8NqRvGQVOx9U/H/4yxcYahi2OZcSCqRivw  
PscQW+f8/UOCGAdKCz8q/pgbYoxC/GVxl+OAbPtD6eNRQ0xOzmlXuDoOJqRL  
ZUwuGWDZDusP/Dri4LWD48uBYT3smi0TiZoqHmRP0F2fmdbFxJwEFmtp4sGT  
83X5cJou9sBd8oIzQzzcetr8/2MLtYTALRaxRoPKi/5byQl6WC/0y/j9ATj  
4V5wrMRXRW1M/6EYbbFyPPRFDLLKDWlglmrfq/NRPHBamh8aStLAHN/W6WWo  
xcN62Qo+U0EDC144WxSpGw+DgTRO566rYyWCSNz00h7SBFwqT8RcxGZTjA2P  
R8YD1fOvze/dL2BrnNy/+GPjYTiWN9pA7AK2ff3D5YOJ8eDrTm1UswQYy1Pb  
r7SZ8bCo/nrgdyBgsituoXOXKfY70l4V5cWwWPOo0jtPKPyqd1gvtatg6V/P  
X6hoiYdn406Zdx1UMII/1ezVl/HAXZfXY7qnjJVnppzJ646HjXHli+3nlbGe  
1ry2gNF4sjv7r+16nxLGc6p8XmE7Hnr5R6wOiihgRx+45Zz5Gw9yR6kXEfkf  
MbELYrKi+xJA8df38+zp8piqTV3UIaYE8DoufjpkRQ5zymti3eVLgCB+/8a9  
zrNY/Waf3EulBCAIdDzvqJHBqP99FAxVTQAFntauRD8ZzJz+G/1pSACZFY0z  
9PIy2C7X349krQRIduKsMG+TxnRlJWM8zBOg6ejzpEe9Z7Bzn5wOtuAEiNBm  
kmoulcCUgy/XtYclAGVXT09QlcByoiqKIqISYJLbw4N96jQml9ni+TUxAQzv  
qiIL4dNYQtXygceEBOBUStG+8FwMO/xFz9y+PgH26gdPaZ0+hfkvWGEH7yda  
jxy1KHLSBH15ira9Ygi73nx02/5IpjXv5gdmVaKPTTbz9J2TmJNh+uu0fUn  
wLNMNx3XUWHMxIJ17s5iAky/HofVtuNYpT3/gONKApQzPkihST607biKPOFZ

TwDHfaEaSxrHsbJglBW/nQA0MvEVYn3HsBWC7xlTxkSlvvN0m/3LUSyz703Y  
n50J4IRXPJ3lJITZ2mTV/RNLhE+WftqSPwUxqUWtbzRSiVDh9d3KMU0QG2J4  
acyikAi1pWdcPBoPY/wX70sKaibCirT/IyN+Aez2k6KvyC0RSpMMix9J8GGR  
2qb8F70Soe6Y9fCXyV4M/4HdSMs3EWaLeXr1Y3mxtZ8ZrQahidAuYfRweJgH  
U5K0vuyQmoggS13y4j+ZzY12VDgaJlYlwS0u5+4fKQaxEXjA1tSYRdlr2/+X+  
zYn5tl8+y6xLhMg7rVcV7nFi7F+MxUmPEqFLtDrLQZwTsxDUoCt/nQhTVyr7  
9k5xYLMksea02UTgqV3fUr/CijUdn/3RvZgInwffQESCFcu8d1P0zUoivOcR  
iLjSegCTeitQOPI7EQgXy1NE51mw0P2sAXP0SeDgaGpzRI8Zo0tYF2E6lQQf  
hYtPiFgzYlNf+St2xJpG5drBUUMaRuyR5sUT36WSYL9vY1rjXQbMjYV85K1C  
EmwNV1kz0TNgr4vk+Qo0k+Da88rrme10WGpdONMxtyQoOCfqxx1Cg9lz3Ejj  
9EqCs5Fdyg1naDCF4G46Wt8kGOiOdVNBosZmz/FTz4UkwUndq8rgSo1pdjTv  
3ElJAtln9bY6Lvsw+om9JaWKJLhXcjbhCu8/NIV0eYnfToJnZ106XlfvoUc3  
DOYF7ibB+yx0N0plD7m5l83sPuiCozRCYp6uf9Hr9QuT7e1JEKMwEdjV8wel  
MqW8MZxJAn59LrarH7aQvc9dvNp8EshYc7SxxW0hhbfve85+T4K22cmc56e2  
0CxZpJpNzXLQMz7ffRW9iTSPdj2foEmG/kNkjk9yvxdGDIvM9jxPjciVNNyp3  
dAOJcsUE8ZxKhtM1517HF20g3R8r8u3iyVCfjI82MN9AubVDT4/IJoNE83mt  
sJF1xH00pH0EkqEnbOdk+fQPJMik9lHdPhl+xmDBHPxrSHu2pGTdMRmSU+o7  
GLpXkdcrFrsy12SwLZFz0f9vFdXFrH3+45MM1vzMbst5K0hh/fFSY1QyVOtR  
u+3ft4w0xjX/Hb2cDFRtEG53ZBG5NTW9fFoADEER5eTYrgWUXiCeHF2WDK/X  
NKPaAhdQnwEr08eqZLBM4hK+1TOPTNvfc+Y9SgbFnx56NmlzyOWui8jfd8nQ  
3uE8rybzDaVmjszXfEgGPvpXvS8XZ1C1u3at5XgyvAr4/EC0YgZ9PyYh/eBL  
MnyeGc4vPzyDggs3znn/SlaGIW/KrDxfUVJcot4oawqwy0k1hkl/Rslz5XYj  
nClQbkp9IXF9GrVrd156x5MCTFdFRXwfTiNaTpbcfqEUiJo/cnry/DRKLS94

81IqBQ4m6eNi7k2hzO5qgxr9FMj2Gdxn4j6OxKV6/6syToE1qnQ6Mu046iUu  
+5WbpwADIezYuVtjiMVWNv+afQr8DVSZvjozinJXmgeIvilw6/OihFnYR0Q4  
+NYoKjcFOjJyrhd/fl9kw384hhNTwJGhJIA+8z0amjgYGFKYAv+evDYlqL5H  
nJWWRL9rKcC/K1K5VD6MyEpfhpzrUkC63i5dMPEdKrb7ZYJ/kwIS0SrKRO9B  
pNTG66IzlAL1GtnlyxKDaFREOVhzJAUyOGKIJVYHEP9aLBmmUsBro0ZBM3QA  
ISYyvpdbSYHDHktRkoJv0fUqAXNB1lQqa0gZfNPdizJT02pGOFKbtmzkd4ZP  
Lwp23djL406F79stNNHsvUj7RG8VtWAqGDvsCGza9KD1a5Hbc6dTIU70ncoC  
VTdSLxwtbdRJhc/S+rPP4l4jqRCNH956qaDn+29RV+410mR6T+OkUSoQ59d+  
fVzoQCscGStFlqlQz4i5zVl0oKlCjYhxTwUFUZnKS1g7Wkwu+qqVkg015Qa/  
SpTa0LAzjdK+jFQYq1uNDPvzEj1X88t+mp0Kb1lXBY4+f4nIVFrykuRU8Em4  
xd0v/RKdj/6dynkrFVSymFqsXF+g/CAz8ckXqWDYsRjTlNiClo1fxha2p0It  
3y2qH0dakluM5DuDrlToK/uwEt36DJ1bpY1ue5sK+fdmxmL+NaMvXg/6q6ZS  
oThlLKc2/ymSdzoYELibCpV3W6JNlh4jEe4llkNUaWD/xUKc7+pjxNPVVv2c  
Jg2IympnJw0eo9+SgdMszGnQ8euRpV3TI9S0PWBQdSgNnP8s/50nPOsqhFyp  
CYU0qHX9y/Y64j6SUHfrSVROg4GbUhWayveR4OZ5NzGUBvUpvqVX/jSiPdvI  
q6EaaRAx2d34OL4RvRDFH+AwTQPRc88yvcn3kPoLpu8aAWkw/e3P3YzWeiQX  
9DntezBFn4VjlbTFTop8uQEKTwnZNkkuEg/6hB9tofNdFwacN2mjmwxq0Nd  
Fp09kblpQD8r+V769h2EW02+XV+bBioZWi3in28j1Zu2Gub1aaBGYOq9kHmb  
SZjJfd5tTIN0IVAuP+XbiKX5K5/u0zSI7HfI3iuqRm9S1dJnuijx0frpm/9f  
FTIWonI/NjsGY8ucoZGCFeilZboh2yKFv4w9nfiuHEmT2JXpVij/bdiEajLL  
ESvjsQM/fqWBpssVo/4/t1DPjwv3u+jSQZamVbFk4Sa60JH0L+xkOnjfq6ff  
96MMNfxjXrgklg5009zv3j8sQ0LK5CFnyXRofa/lil8qQ7t15RUG8ulw5Nmy  
gy5TGW0q7sCd0kgH0T4to1Hba0jah6F4xCUdyB8MEuXOXUHxK/MS+jzS4Wjd



yCOG8RLE+pnXu80nHVlufeIWji1B381EUUV1wOlTTKdCjd11G1ZjOTEpyOszL  
nk2h9y5GRw9mScuXp0P7ed3v0/MFKE/vIP/p6nTobrG9evlqAdpLu0Jz7E46  
vL+xgjmZFKCJ3doRlGfpMPjTgJm7jYyKZ/uiZ16lw5ydelFpLQmxPWXtJn1N  
h7fhrMUcdwioy3f6t8ZcOlykb5plDyag+BONwluL6RB2biLotSoBrWebxduu  
p4MXv9sQfiAfjfxXqnhyXwbQc4U8E/6Xh0rpxCsfCWUAT0D4+ZadbGT29M87  
j+MZsBGv2vzqejZi9evfjyCSASOiiBs7Gtko/qO/XZxkBnwwkR//XpCFnGsf  
c2mrZsCv0obkkluZSNxii2nUKgMEJKqCRwbT0Fc63ntZdhlw+E+ZuFh6Gip9  
Oj913jEDfKe2W/yxNMQqnK180yMDeiyST7xoSEU/fg/98ArLACXPDUW2aymo  
qdTBYZecAVQ/m2QjbiShACPZ3LriDIgYNFvIcU1C4vS0zxxKMyCq+jmzt3gS  
KvWr4u24lQFtTmflQh4loji1lTc5jRkgNctul/MhAWnOR50/MpABktyj7wZV  
4lGs8F7T0eEMKDSxe2fjEI8eOsTLHf+YAct0risXquKQ8Gjy6ZPTGUD01e0c  
nlhF+3pyDp1eywD1EmtCkWUMelZ7/ZcCeybMn8+ML8uNRD/njgUocWUC8Mft  
rCtHotPC5d/P8WWCg+Hh6JD5CFRSWv1V9WgmrMa9MPmjGYHCcu4NqklnwuJ8  
e+J1jnAk6/fqrr5hJhBfuRpujIYgr1oNMUPTTAgv5g6PLgpBN+Y6y40sM8Gp  
TPrqllkIYnfou2LqkAl62wXXm94Ho2XD9xnW/pnwWM8l8tGnIFQtO+fqlp8J  
orGX6NQFAtEnX8/P7uRM+HIUSkBlngDx1C7ZehZnwo6JPbZ+LwClnFgz8SnL  
hFK+1t5CXABY4tq+ENiQCUJTBjeC0vyR40/9QrEDlPf97fhbyBdZ029P+wxn  
Qv/ZI3VdS5dQMc/cLZuPmVBi5U/FVXIjCsq+Ejs3nQnRP6t00+34IMbwKpMf  
q5nQJV9HX/HaG/3cXsj7sWUBA50kdiHfE8nuH2OzOpgFXh7V4a/1PJEff9eQ  
Fm8WhOqoUCuxeKJF5XLLk0eywJuvqXU4ywNNR9m6TEtlgeZmwvveKAnfU97cv  
ylw/C7S0bxaeGXRF+1mbkYZxFpx9Np5wqtQVaQnd3idnngWBwww3ptxdURtK  
SeOwz4LTtd+7ova5oqa486S+S1lAtHv4dUrVBZXvq6tRy8kCbUNH2bwhJ/SF  
o/SSDCELLyYLzJVO6EjxzOljxZkgTJodoo/1gmVqLk9+luaBbfHn7b+Pe2E

8pOE2pruZEGHAQWduY4oii5vVKovC6zTr+z3vuSAqPNFT4++zQI3TctLA3oO  
KJN/by75XRaYPW/IuCHlgIrPXPo9NpYFz+fqSNRf/00PrHAH0xayoEB5s4lz  
yx79uMug94k+G2LgxfCSuh0KV8JMM/dnwxBf19KOewQ1atQG3nWbOCTsVTc  
nLJFrB+/eWZxZwPX/YtSZVG2SIK6PVVROBsq5Lybcp/ZIHfz+Bd5F7KhvdHU  
6pyNNVqZftyprJEN+yqa9K/KWKNQ79U337Szgbfxc0Q2ozVKjrefVDHMBjRy  
aZm2yQrdrFHdmbPPhjzz0TtiglZocm/rLERng+onOYaEPQvkkiGtshSXDRPP  
ZW/VTFig7wc91AqTsmH5idkWNFugHdEPht8zs6G1JDqhPsIC8Zk8vFR8ORt+  
+3luhvwxRyZVAVVrjyj+BZY0PuYwR5ZPrHYXn2bDq0lO4sSGGbLvvWD0rTUb  
fr6Z2PYZMUNeqxx/RI9ngzlp72xPqRIKVGzUfzWSDeSt0WFTKTN0r3P9V8Hv  
bFBTn9u85GyKHo2O6ebvZENI1+KDcpwperbUdj1zj2Lf0ClFSTIT1MVG0omj  
z4HdhHZTaXpTNG1x9qoHTw4oRbWFzt81QWzzQeoqCjlg63fT3YfZBHHT2FyW  
V84BI5mDXP9tGSN+FvWVMygHYgsLagu/GSMRaa5iYc0c6DbScB18YYxQ+IOI  
A+Y50NWamWifaYwuMf4iTofkwBWGuKwT20YokH9ybiwiB5xGppJpF41QuESH  
6vuYHDB2Fc0THDdCyYYFs90pOZR6KGT60WKESovlle8X5MBq7lvhXylGqFc0  
9HPKwxx4c8kmb13ICPE/rIpUfZIDIprkqpqDRsjrwujBjWc5IFhh0pHOaIT2  
W6tqOrTnQEb8o4MP1w2RbhZ1rfK7HPDxB9uXXYaoazk3eHUtB9T1aK5djDJE  
fjEvDIT+zAHTei7ak4GGyIN+vdJ2KwfsW1dET3oaIoYjZqPd/3Jgx0fvc5yF  
Idl0FEDlrLmgEnz6C0HeELU3VjFYSeTCFaX0k0XLBogLGy1jk84FFxvdZ2+n  
DJBL737l12dzoYkz+p3ygAGimbnkc1YIFzqzM2sr7xsgNW65wQ06uTD7ZvRw  
V7QBehn2oqTNPrfKcgM/9vAaIHba9bMR3rlgzvtP+iezAXLIP9F/xi8X6rx9  
arWpDBDV7dR/paG5wNmhIRWwoI9gD08SlpILh20iUu+36KNW1VFJiVu5cJuX  
26zwkj7iuhrK0lCZC6OGmbaeLvrl6+/B1aCaXAg4Ettub60PeFr1G5rvUexr  
yduu09FHlB1XFvciF4gdQkMft+mjw2r1il6TuXBxfj/zjwU9FHgTz8f6ORc0

HYcZH33RQ13Ui1v3ZnKBSmQkpHBcDwW/En66vZQLr5qlPlf166Fe9RLVj1c  
YPu00UJ1Xw9FaqVcqObNgx4lXgPiiXpooOr4cbxAHpgTH38PiNZDIowvqNeE  
8qA53UL3TageGuraaUokgdUObyv2rz1kjiuv2anXB78fGKTnGuuh2JrDpzy  
VsqDNy9MJH2N9NDw/loGNtU8sJstHrfH66H43m9d5hfzIONNU1aAmh76iLFB  
zRrlQaHEwKfpM3p16u7W6UyzPDCtrgwuPq2Hkg8UskhZ5YHGGYevgaf0kPSb  
gf4QhzzA/Hb3Zx/RQ6lSvnWHXPIgU/rlzS4BPTSRy5zX4p4H6Qcq3p7g00Pp  
BpqGdH55cPy0dY0Mhx6aqv8qfTswD/aCuuW/HNBDCuwJHHqhecC+IMB1d78e  
mh5oHiLH5IGZx2JKDq0eUjSWMRPOzoMfUnWuNtt4xKlcl8Sbnweim9zd6b/x  
aPpY/7395DxwUQqi693Ao/QfHqw/ruSBZE5CYfoKHo3ll3W210bBH2PurZcz  
eBT7lk3ZojcPBOcsanaH8Mj4sZ2H7ts8WLS6Kj08gEenrtcWnn+XByNfKjpp  
3uDRgK/WxonxPLC+FnTboAePjrHG3VlbpMjLFVMwfolHv3/1jX1dyYPnKfXs  
u6141DPJz/RhPQ/kHD9xlTzDo8C7j1xbdvlgULLh1N3HeOQkEsamQZcPcivn  
zZju4hGe/1olYsgHt0llG6kaPFJg7TivxJQPI3FdFapVeMT8m9Pn9IF8eKjB  
VMh2g6Jv4RzNSbZ86Docmjh4leL/pEOJEEc+OLLOQVgJHj3oqOvi4M4Hr2rt  
lx4kPLr25P1/zLz5EE070X0vJxKfu7u/aQ/lg90XLtnRLDyyLdA9uXWYli9T  
tq4lCY/oXGcTpoTzARz/nn0cgEdrlgcOfRTJh8prWTz9PpR44uUaBkXzwVMi  
POiROx7VySVotUvkg1bZJ7E9WzwqFr0d0iqVD/TKXD1WFniUeHiApUk6H9yz  
+AOTjPDInFZIpVYuH8yfsbmraOARbKkPlSvkQ7pB085rhEfi3709rynlw619  
lScElPDo37snRQTVfBgTa2/jFcej6ltmP8PU80G6Tc8pjxmPHpveuGugSYmn  
1SVXSvo8ek237HZK0x/Ip02WJ7s4N0OePDqCy4eeP1qnri3j0DGJ+63yJvkw  
OY7/UvIGh0oesGds00YD30K4QnYODuV09Ar6xeXDSo2XSj4VDgXOXDbye5oP  
0a5KHuYU6dBBMuFa5PssHni9Hihaf6CC2wQwG19Z8oJ7S4b9Rp4PuPB3sdG7L  
h9rGjxbbRTroW46jtmNPPmS7WfDaeekgS7kEHduxfBC9/29JmFUHiYhV3LaZ

yIfTsO6SSa2Dfgl2M9lM5UNeZzju+29tRGTg6LH6kg+fl5jV6j9po76xMl2L  
xXw4wDtlHHxPG2EJL3DGO/kwY53OlGuhjVhDZ2qNdvPB72BB1z28NprwYmQx  
2suHmoSd7bUL2ijc1LDPgJoAkXHx37oktFHjqWm83n4C8NMYqnDQaqP4w7R3  
8SwEIHhvz6vtaCEDDtEDeFYC+GTa+Vxb00Lfd/z6dTkj0LpELzI2qYVE3vzT  
0+YngD328EXhUy30s+1EndZhAjTaMYfrNGqhV4+1WLWECCB2NtZDrkYLOdzI  
e6NxnACrNN4iT0u0kFThfSkNYQL4xrVkW5K00G7mh1x1EQIENU7aKWRrocvB  
RwwuilP0Y0qBj201kIfnxXo1CQLkHcLp24drIQV7dzY1KQKU1k68xgVqoSGt  
+rcgS4COTYnn+9y1UJnquzMgRwBO2fYP/Y5ayE9mMw9TIMAN4azWOVstxCKA  
GSJlAvyQtRjIMdVCVP1pQwKqBBgUOplpbaiFNmIHTLfPE4C0k7CyjtdCs9KH  
PoxgFP9q9PtGdLTQ2BdHqwcXCFB/0KuEQUsl9ZNrxgkXCcDCf/9tqroWeqG5  
YeenQQCtm4xfzdS00IMtlWm8FgE+5evgQkELVdUk04nrEMC8xzRuAWmhEtv+  
GQYcAcTPMv1uOK+Fcll53L/hCTBRryHyRIULJbywX2jTJ8CS8EKqGoUODqzy  
LjMkwMfQoVw2Cu0hvLYcY0yA45nTDxQotM2lkr+NKQF0Lq77PaHQ+ukJ60rm  
BOhPnVW4TJGvptwTzGNJAKlzpEfKPoVvnNublgR4DtafxVCsU/smk3EoA0B  
UqM7w0Io9h82LP9TZ0eAqJEdzo8U/9ipl2Oy/yOAgYw3y3WK/zQP5Km8HAKQ  
E7A51qurhX67xiZqOVP4o2J//aevhRZ502lPuhJg+eynIVtjLTTZzZZG7U7R  
H7e18MpcCw1EWTJNexCg58Lte4U2Wqhd8kZWixcB1B0GykYctNDjTwsHrvGQ  
gOc5XirFTQvVEGTzw30J8Ert78AtHy1EWWo4zf0J8Pbti39ng7QQ4dcr8tIA  
AtzTDZVRjNRC4VZml1dCCMBUKhtRmqGFfjivCfSFESBOZTN6H1EL/dcye/V2  
BAF6rcX++0SpT81j4TddYij2V07yMdVpoYMLJbVjyRR643Cb2KgWor/yVbIp  
lQBHeaMqxma00A5eoqEgnVIfox9iZyh4mW5oeWCYTQAPn2+DO0zaqC58uuU1  
iQD7hJ5KbmHa6la4GJQXE0B5bugvBX1tRJ4IaEsolGAD1ZczrbbaKApoOlWv  
EICVW6j5aqQ20mYUGWi8SQAXe/J/7k+00dci7y/X7lHqRaA9yfyCDho768UY

dJ8AeHkThl5jHTTw1kNK6yEBHD0E11xddNAzBrfl1SYCyGeV/kebroMKwxw4  
4QUB/vv04eX9AR2ka2Gm9vkNAe5cf3fqjJsuaudBbp74Tol3oNvUAXIOVTae  
79pcJkDls9Ouxytx6Kq+6krvKgEe3d28EtaEQ5mp55SDNwggw/nPCaHACH1x+  
nx1q3yGA8Fk/D2ZhPOIdEaV2YyLCmt7FnFnKvGMNPCWqzEwEa2Op2m9P8YiW  
VUSf9QARll7RWd+lzNs1jRMIj9ijYOhw/2buAmW+PhSUZeAjws/LVzydhCn7  
TgGnU7UIEfw2rsoQ8ij7RMiCVLkoEa6WhGwqXNVDi6Yv/lwXJ8IG40JDWY0e  
MuPyLSiSikLBzGvGx+16SILU3ZWqQARLZUtSwy899CWwrCBRiQhmLQznFffp  
oyLjMKdYZSKEW5es+LHoI2rOk7shiEjZX7ODVo7po9H8+DOumkSgDr6G+6yt  
j3L9LXYdtInwycsh6omRPII3lOq21SXCyht8p4y1Pmpgm3Ay1ScCX3pXy7an  
PnJbbTxjaEiE9Xuey+oB+kjgbcYuzpgIEeuWF0+F66PUXMXCi+aU944aPtXJ  
+kjVI9UZs6S8dzZtV8vUR+t6386oWBPhj8h7vHeePqqWfLarYEuEQrJh1xGy  
PrI7QOqWtSfCkSKDbbtifcS57Fko5UCEHT6bmydK9VFXHziLOxEhg3Y3xfe6  
Poq9wyst4kiEMfVmN9Wb+kgue2X3mBsRVNuOMWSV66NF745uQQ8iHPdsErOs  
1EfXcaWFh7yIoHyCkXCjSh+Zng5y5yYhwrexy/9cqvxRfmZdaQ5flqRE/IYs  
o9AvFo/+ZfGnxPN75a4hhQ7t2exmDCTCUQE59hAKv0TNm0LaYCKMr4nI76fl  
/5xR4UwVSoQDloxSrBT9hZ7R0rthROBWcWyJvaGP8DomfzcyjKPWR/LTC6hol  
P2LiPrRtRFPuErt4uLdFHTYz7ilZjiLCwTsjSKNRHvvMfnJfiiEC/flzVmKCP  
TnTVSc8IEGHq9/uN51n66GNVyt8vSUTo21H4l51CyWeabc9UChGkv/avP4ql  
5NP9bNFYGH8Sk4QVML00Y7mfpeRDCJM7n9ZyudHya/IZ+mhLCLMC535iHPT  
R670TX/7cyj1/ul33TtbfcQ/m9vTnUcE4/Gy+VpjfTTQ4VrUQSCCu+UjtWet  
Sn5TDsq0FBABhLXc90tT8uuy+LepiAivtIYfHTyhj6rUX/Y8uEyE9LC1NGdu  
Sj5p/VzuXKXkp2K7qX+Tcn981ZCpvk7BT9jW1a9zFHy8Orx36wYRzKlqWBU/  
6KGFxj6iKxWUelxrX82h3B/tR16nhlRR8tX6ZP+HG3ro2rOXIQa3iVDnVe7p

R8GT6e8mE5q7RKiYZL+f4qGHWj2r2LwfEOfOhFcoN6ceKqa/taf+iAh7i/0B  
t3bwKOjWtWWWhJiLYVu31BXzBI9HJgt6hZiIY/LM5592ARyTD5DTIV0TQPuev  
e0wHj3yX40K5Oogwez+BeU4Kj7Qzo1xXXhPB9IpgWgkXHu29Crx4s4cIJmcv  
n9z+hEMeio7/mlaI4Ct4RGMsDIfUhm1Xvr4jAj+J5qiJPQ4JBlhOtrwnQmhU  
czmPBg4N1Rg0B4xS6u2U7ok7B3HovBAKG52m4DvBSdn8kS7iaz7ndv8LEb4e  
c7rtWaaL1i3kzXJmiKCKEntPOEsXVRMkzl6Yp+DbpoH2hZMuSpQSPS6wSATm  
W8VZjw10kV3vCY5fS0R4PXvhRMp5XcRJJ7BavUqEsJmo3QEBXft9Bs9U4g9K  
Pj5NRbix6KJOxNlvu0EETuuqOKo9HXRz/MAzhV9EuB/UWluzpoOiw5lq2Tcp  
+NU7U0o/o4MsuOlKFreI4M0Ys2I3qoNkG6ky2ncoeG//DbFvdRCLwW7YtV0i  
MJY7y0y+1kFzS5tu4XtE0H19xy71uQ5qS98wM6YiQQq+2TmFsq+WnlxVl6Am  
QZRF+OdvD3RQWNviWXpaEswx9Affv6eDjP+bPT5NR4Ls2JvN2/U6SGL3M8dT  
BhKITnw2aafQDjcnqchMJCC8n3cVorz/Ij+6eomZBMzmazSl9ynzZWh4SusA  
CR5wFhZNPALMF7+B/mNsJDg825Mw9VQHBBd0PfvDTol3NXEnyBT78Lc7a99z  
ksBTpWjys52yD2u+KqnnloFroAQHda802ve1NSODhwS24vRHagd10ETc03Bn  
PhKMnz/hsfRRBxGe3DPnPUyCG58Xzxxc0EHijSnf+YQo/w+lhdSt66D2SKtE  
/qMk4G0Mft2yq402VPbVCQqT4M/Q05dVnLrIodWQTliCBokZWkbKRV20c034  
ykkpEgykG18/Y6iLyHFb0qekSbA17SnmbKeLuqDMVlyOBDYsRwcdw3XRmVer  
96VVSrdnRDN1t57y/9YrHVIEgikV4v7cFl3klFz06SyQgN6An9uhVxcVamDM  
iuok4CTlBzX06ijpkYM3lDRJILXb7H30py7qoZ9TUNamyGOz+WG5D4f2OnOd  
zuNjCkbc14NWAIEkq522kD4Juv47+tP5FA7JZijkgiFFvvyL1+5ncchNd+rj  
RVMSzFxD5HXxaH+PkkOXVsSvK57VcMVSPi/d18Vzp4Em0fqA9Wjclgq972q  
ngMJSgukTE2ScUjOIMbD0IUEbIP+Tf8KcOjNGaM9IzcS6CiFfSu4RsEf+0my  
iQcJ+meL43cp8790sO+5uQ8lfrYPzSQe45BCY5mZpS8JJDs2zq204tAAMXj

yp8EG4+HpWNe4xCt6WFeu2AStMXS9dYP49A1ubU79qEkUPhZ3OQ0jkNK3O1q  
DuEkqFQwb+n6jEPeI96+ztEkMHR973CdcR/RPsZoXWNJ8Ht97DbjBoW/6GCJ  
WzwJQvIJ9jxbFP7wuTMeiZT4sQoMt1PuvyHL5g7PZBL0nr/8H/s+PPI5l2fj  
nUrx1XS/BfIXqTnd/7hk04C6o0dFn9GPCrbUUjzzSSBFf/x0WjKfak8vl/Q  
P5sEffldbHyseDTcPNUYkEsCdh56esRO6V+ljdPb+ZR6y6LnWOLAI8aY1Klg  
Iglm3edTBA7i0U076+BQMiUfKf1Peim0KpLaH15IgyCD/u2KPSIEHVZRDEJ  
itNF75dSaP9/7+WjSkjwVPjL8UeceMQ0fbs3upQEtcoilUCRX1lzli7kGgnU  
JrYcL7LhkVpIC7pURgLp2HCrhyx49AnTCne9SQKZK1JcJCY8it4/eM+unAS0  
deWHRUnw6NB76yWzShK4ybj8SKLE49H1GWH9ahLwlP0+nk+Jl4mXr71mDaX+  
g7/J7/zGoTW5rSJ0hwReE1K/Otco9/G/hEGFOhLstfKfPbOIQ+I9zMxnGkhw  
pZnVC32l7Hv/HYk98oBij4NKhh8lvx8zNF2onpEg8au93rv7OBRiOnB1q4UE  
Ap3pL2VrcYjziPWHteckUH3c+dD3Jg7hH1zS/fyKBKbKjgaF+Tj0flos3dZL  
gutK+6/a+OCQ7W0hr6f9FP+Wv7qbO+PQVID1rca3JHhTncXlZE3BA9Mznlvv  
SGDUeEz9tTZlXz37dTdpnATWUX7GERS8XNzzUYieJMHY8luExiM4NN312y/4  
EwWvZy7/l0bDIX77/V9dvlL6l3vze979OPRYlHzY7hsJRJKCbHNocMh0Q9Dc  
bI6Cf8E8C6e/uig3XaZbY4kExrj+cfV1XXTapJkaLZPgvqB9zH/LlH4gqKGq  
sErpP9+l2jfmDZhr/JsQqR8Ue9+HqjJ+00XU9y3rRTZiILbjE3jrsy66HvNl  
XugXCULdtd7p3SRqrbPcd5NEtD5g3b6hC76yPnbhm2b0o+psqk+jemikMm4  
AoY/JJDQdqoaGdVfDYekxq09ErRwq+wzpdDzDFVR89RksFt/guYodMqQ9MNP  
WjjgLtnBuRT+41efrnykj4PeTAApYFwXPXdxFfx1kpLyPrW7NpeizlX3j2L2f  
DDo3gw7NT0qi7V2LKy9ZyDDrxt3p94nSzzo/Dz9hJQPr17eLZyj2nyV6szay  
k6FI8lvV8a+6aMD2l1YNjxms7lqOaVL8vXQqLuEmFxlOZ4hGfC/pov3rjM0l  
PBR5nWMfeBd1kXraYaksfJEjtacklZVRfRsvRmOh8lQz5GyZEUjb1dhxDdF

ITLcTKKPUv+li/CVI6Uzx8ggyc7yw++PLjLpyGdGYmQovBP97QATDnHpYe5c  
p8kgTVpqbGDBoZHh5bZFCTIQawTkPNhxyHpGN7JlmgwS7n0abJT809HQLawp  
kiFq8f4oCgOCWfdV+88R4YVjWteMhI4NMvpVHZVhRK/ZryQpTQOeR1/bqGL  
kWGOt1vviRIOBVyIeH1Lkwz0CQdDy3RwKD5u+Za5GRmoqN6MbnhR9hWG0n8S  
FmRYvXByi9aP0s/ydG1orMjAkSQzvT8Ih9KvVXE22JJB8MX3+u+ROKQrYu6b  
ak+GWyWTHu2xOMRSR9tj60CGfBmG3PREHMprcUxgciHDgFH68/4MHDLUYJ/8  
5EqGlifHrurmUPDV36r0yJ0M2lfCMmopeCqcEFhz8iaDa/qENEcRDlm69ODO  
XSIDIVCyhaOEUV/fw6vY/MiQQ2rdWS6l9Nc/7+2fBZJBXPGkhAwFnw5JyU+J  
wRT+YtUfpHlcOs58lsczlAyVy7z7eyjzYIb40QALJ4OSiOV/g9UU/PHn93NH  
ksFL5tpoVQ1lftxEYt+jyJC+l+mIu0PpH+LLyW0xZPgU/fzTk7s49P3eleni  
ODK0XplQ/VGHQ3fP6ar6JZDBTzfjcbUeh3xfbhVpJJFBLdxUobEBh6R1qjYE  
UsiQzPXjluI9HFofMDNYTyVDIusOMYZCP7Ckre1Kp+gzY/+eQKFDpxvpr2eS  
YebjcEahVbycHQKySbD17T52BaKvJ1VtlZcLhksqCQyf1D0PQtrPXQ8nxJP  
nLvuT4o95y9qHD5KJMP64zeTjyj2trL2CQmRybCNjH8ZUPzBxoyPHS4kg033  
aFMbxd8XFamN+IvJUI7pGXLexqELAQ4ifCVksM0kf71QhUNtqnOiPKUU/BCL  
SkwrcKjj3U9Jzjly5V7yPyh9A4c0r0dJs98kg4MEz8l/lPnb5UV9lrWcIv88  
704LJT89+9iV9leTYVqoN4e3+P/z+rQadQMZZA0snhBzccjgzz11qkYynPGU  
v6iUTZnHr5W09u6T4ZpI3dtZSr0M2Wnidx6TYVOSLd87hdL/xfr1t56Q4Zd2  
50HtJBwa/mli9LuZDNm3n5xTTsChD1m05uvPyVA7+Z3ZJ4ZSPxbzlv+ruMzD  
atyIMC7KSTKmTAlNKfJjrmRbRKnzlcw0UJSpUmiQBg2GSfFD2ftr0ky3Tald  
qSgaajK6NFEalNxukgip7vLn73nO2Wfvd73rPWv1FmA+BAwJMnGeaFB0tux5  
in6Y+GHDLPSvZc9X6+4iEZg7iP5LPSkkb7K9bT6WiKDC76PqHpzfr+O2f/h  
uQjSV1TPBHchaTK/aN9RhvU+uazH3E1I9spPOdReIYJU9W9IEa6Y1538kdYX



Imh6Jx0gmx7V8Hp3UvsL/PcuUHYP62+V52bakTgU2nlMxt5v8ni429eiUAp  
fZLeI5x/2mXvujbUiqBQ81u/M3LHjXzP140iW07e1j8TEi6DCp9q5tFsGnC  
0tVFyN0NjYGVbdgfdm0jj5F7jnUFIXaKwPujlFI3cq/kQEjxv9iPEzLiDfG8  
vnjxiCefRMDpvz1ajnzCIZjmf8bvz9JLVsD790tOjXz0BfPofeyFU8huo60i  
c7+if7pUC5qRv1XMvfJwQAS57j8+mOL7PKKuxT/4gfrWL08oRP5utyQpaxD1  
2Tt01gD1GRzUS80cEUHZhLu7d6F+3iUFaRliFBJetp39D3k4f0ONW2MomPUq  
W19AvUep7biTLqDg6WZ9oQbrIb7rWE7SjApFi+cbpGL90t/Jv/OdQuFs2II+  
S2/Mk8PPxC1lKMiUrDOWw3rHnpprJjOdwurFd4siMY90rIS8C1SgYCKysnuM  
/mhQ8ZSwmUdhUEfuUjDmk98tZTV9RQpP749ZuBP9VP7Y60S/CoU1za9SunDe  
tG9dNNZ+CQWH87XSHecx3xxeqa1dSsG6KUMzMkhIMr/4bZqjRSFD2S3KAP26  
y3ux6w9tfl/+Kv905GHxushXOhTmC2YpBl4UkpSQwLw7uhSmHFyYJRuM+Sm3  
tDXkDwqSxMcyjDrk3rmHsET0Kn5yWjshjP7AF59QN9Snrcrtt+5DKyfoaWuSKh  
sMxGMPkbcusfb12H11DY12FRtgnzNKggKKphLQVV040vY5A1THQeZRIQ00xu  
4FCPfmoyWOBsRGFSZPEsVey/YsdW8wVCCnEWMelLkaf6roxuNqNgU3Hy30/4  
+T2XQ9v4LRQ20W8sOYwsPkNf0nUbhYCQsyozkNMT0heb76BwvFU18hHeZ+A0  
cZe0oHA/2KLjK74nTu9jdLsl1nvCi9rzyOuf0sf51hQ85juOm4Yc+k+3pKct  
hekW7bvmoD4LB6Jjug7hfUPUG0ejvpWnDfOLjld4JW8wyh31d5Xsa090pNDQ  
Pz6v8xzm10xjDQsXCsl1boueYz7s0h/IL/WgkNMj0SoC6zlcMPT+mieFbjJO  
Vgo5xdRMKtCLQkmlwcwzWP/ePVe3rjpNITVAbXYg+oN1mp+c7k9h/Y5sjXHI  
+i6/Yr8EUMgONLQW+QnJbf+tHdfPYf2N5q3IPY3zXP+9W75BFDLF176yRH5z  
QM5j80UKrw1Hjo5GPlvvsUb5EoVDFgbnM9CPGly9YCCEwthLXxMOINc+0qt6  
fhn9snCYqCD7acVGxoZRCpqqoNGNfl6UMmTjHEGhsf9D3y3karm9i9ZR9AOR  
0D2M7HUH//M0noKXcaHnbGTIX/Mfdkb+1t8dirE/PFraTUJi8fzQb3sFyPO2

GcrYxFGIXmOfF4f9VFqc2qidQEFz1LhUTWT5G0cc65IpTL6stdAQ87FioVzn  
+lUKxiY7C0s98f8tbMmQTyqFq71fvqgR8917Q5Su/9a/RtEQ+9V+rfto5nY  
D1KDbQuwvyfeq/VYe4+C2LSrjvGYBw9UV8K0LApqucZXpiNLSf+qys6m0P6k  
cGQ85set1/594gUUPsaZScIgpU00bntY+4TCcES0TBzm2ajc9YHphRQSG+1q  
lyCnaVwT+hRjf3cP1T5xEZItiYjP5s8oHNXP4q2RB2U0v1EspXBmXVPkMM4z  
KedKU76WURB3K7a+hmz2Q93pWQUF05PHh7YjDziELI95QWHWypn60sgmm82L  
oYaCvb72hoijmC+6Mjs7XlOI0abBa5B7Zr/uDG6gcOxF0XxZZBCL0qnVR0FK  
sdGsGcjhHZbjalso1JTFneeQ28sUor3fUygnN/POQg4hfvs2dVKQ69R8MQp/  
T/d0i5piFwXdfw1SFsjvAy+9H/E9xbE3nmCflGl5JR0U6jUKdmwyuX3PjH2  
THQPBe34dONC5DdeBzmnXgqGHvyaPajP2Z5n06CPwullTWnjUE8NW7W3U/sp  
bDN5IVWCXFsTfPX9V8xL7Zx2hvnuZ/if04MBCrds+7I9sR7V6hnD1oMUxh07  
s/cU1lOvtctp1xAF9bFLgJlXr5Mjld5uGcH7L7P2GoN+kN5kzZmKMqhI9292  
Qv+4SvA5RmMYLjorsOxDf73JqVjBj8GgyMBCFIZ+XX9cKlpfwGByWacWh/0i  
2+zxUms8g6hyu2Vy2K++9O909QkMhDeWtKtif3clP+9QncQgPLstfDvmQdYD  
u+WzZfC8BaWBkzB/FjzjUmRlGaj21EyNxTw7r1InM3k6A/GbPiuNwzAfwoV9  
4rMZ5Dd7FIjhfjm/8aztiDwDA/nQloEo7LeRR1U/FBgEN294/B3nl5802rd7  
FBn0ije2zEgWkpgNMx3r1Bi8n9YmKMb5q+l7x/vregymRCr/cCrFeej2v03X  
9Bks8RHZ1FclyW17i8IEwmC1TAfZ+BL1ra5IousY5Fmd/lOjTkjm37i397QJ  
gxm3C/Imd/zeTwPqt1gwKI9f41uE+2+5b05GUysGR6qMC7RwP15e/vVvoz0M  
1N946kRLcmTsysNMfx+D6Mux9da4b/811Xyr6hEGozOU9ifLc+TfojkVPzwZ  
BKl8ERUs58jld57qr0YrNU6kn/+D/z+zYZP6T4M6krHCtev4sg8ET/Vyp/B  
SMqWMfHAKR37pux6FMRwf0pKrTLhSNsr5y52kcEp4b0Ta0w54m]cecr5EoPL  
+kvTEzdxJfgz+Mq8UAbzssa8Ids4kj8s3hbAM0jqF/18acURs+P7XS2jGGiE

2hS83MORxvcFEjoxDDRV1w8V2HDkW7nvwdxeH83d+vjdhwJhLfZeQkMzsxy  
eKp1gCOT760SsiSGN9vk/04gR9RjvjsZXWNwSPnT4ZkOHHkwcefi3L8YXBF/  
WpbiyBHDgPuh39Pw/GWnPJWPcsTm8PG7aTcZqF3SqRlx4Qhb0f19/H0GDUIG  
evPcOaJ83eRiexae75By38iDI3cU0mbnPWCQmLww0/YkR0i44CZ9yECqyvub  
kyfWR+IAOZrLIMfV2NjxFEd2exa+MHZeoEV2xTErL450dCvazs1nkLGiR4d4  
c0Tsn+bAqqcMxk+0TH/lw5E/jYhsWhGDH6W2XRd9OSKfE3vNv4TBlpn/NGme  
5jDfBldYPGdg7GOxuQRZN2n3c+0yrIfxFYGH0cKZR9YjK9gUMM2PCTe3nxB  
rrutkkHJtsHd6v4cafrl6pNbxWDOyoOB/siOLjUTaTUDIWda40uQE4nptoF6  
BlpiK/dqB3DktXRJ104WPE/7n5u/P2/np6Ku3cbAZyjs+ALkz18Cc6XeM0iJ  
Ndj1EH/P92CraVsHA09RmloesnQjNOd8YLD4sHLiNbxvIFm8i+gjj09xKWEj  
+D7VJ0NiTt0MvmQ/zFuPFG+5VcSGHqwfmdTthnqsTXuorNDL4HSGSVs46vUg  
XnBjSR+D4tjbQh/UU5NtW7a6n4HRFrFuU9Q79VLiQ+4bgzvrff3FsR4KgT1r  
rb6j3rwtTcD6Uc9Vzx1+MujjOofnY32lXYLMvX4xUNojtA1y5chPK8W90aN4  
GBcY93L0MY4c2+rckTaahxl/SoCcM0c+G0c6ZYvzUNamd2iCE+qju807TpKH  
autRqVcPccR0SfKYD1I8+HlKKhiiPwuVei8OSPNwvrJy0vP9HMmcfDFKbgoP  
22TOKbuh3xcJauepyvDg+rMn9YolRxKGLP5aLstD4rixB1N3oR8+5mVtm8lD  
/Z8au623cESiRYrYzeZh9a+/uyWxv7xrdadmMPDfr9mb5GQIw6Fn2vC5/OQ  
mvN9q8l6jrQ+JJZJSzMP7Jv8AR2icWd4NY7KjxMVRcW8dbnyMY4lc9Vi/C9  
Z9uUFuqg30/unjhJG99b7X+dU+RIzNFrVEGHB7WEn6fT5nBkqv0XeQ1dHk6V  
p4Z8m8GRUVtC1E31ePBq0Zpqj3nzVr1gY/A6HpIPCT7dHMT5qXlhoGARdxc2  
ljnnVwvJhNduUt0387C++8HEMMzDM+VPwlR38vDOVeWtzTMh0Z5tlbDBkoeD  
rycUiz3C/+OI0LzA/TwIDRUG9uE+WnTh7foIex4yvSXWGuE+r++nVp50kAeu  
MXS5djzu506FDQUOPBRlqr6ZS4Ukcf+UfS+dePDw/umoHCokMyz2dL1z5kEw

WeLAsT/zpvl1l95jPDTIXs8yxflRYPR9YOQED7a6m81ccd77H4P2fhM=

"[]},

{RGBColor[0.880722, 0.611041, 0.142051], AbsoluteThickness[1.6], Opacity[1.],  
LineBox[CompressedData["

1:eJwV1Gk41G0bBnBkqSQiu5AtRYVCZDlFEZF9HzSDIbuYsmWf+U9KlsfMU7RR

4SGlzRJJG22KSimRrZSyJVnCO++H+7iP37f7uO7zvNaTIxwDeLi4uPo45/+3

0a93E1HCXKZcvNsWJBKsTXtPDI37Qftk+kFVXWSLojqSW9cdqqT9NOVqfkzl

mdbHy0ED5+00BdPkhVda0os8WeyxSKRJoSyqp/Hi7jdIDi32jiGtg4POkrG

xV4GQM7Tn+ujrQLeDwTK9/BSIfmpu+98niIWA7r6qHpB2Gisc0ngoBJEwj8/

mDx+ELYL3RpvpdQwdDzrftCKCBQk6RhE0jbjvt7f7PJLh3B286fTyuQt+BK+

T7tqfQwuf2L87bTdipgOwduzhTHoPjvaezZPC0YK2kaJWbEYXTQv4Tuogz9G

0u9fuB6GaNpoxtdSeuDR8aneWxIPCcmHHyqz9XBP4p2FFX8CZCNOZdF59REZ

FhbQR02AioLFT4NxfaxdLkuaVkuEXvKpa+dbDODcohM0sSAJnqYW+uE0YyxW

y1xpkEnBFsams9rTxui+ZV9yYHcKeF6K8P2ONQGjV/umd0QKKnw+dSTEMsjq

q00yT3MKFk121ljUAx+ynLrbSakYJlcdVjsDXCUOVAWlp6KDvl5+uaEzSval

vaOWpaK0TSDzWZ0ZWq9NXi0dT4W9zxtHx7pd0BdJTgqKT4NhmiX/9tldqFk0

r0gsTIPK5fo6cQNzmCn+ZK5oSMPsz/OKXbXm0HlFqBbMp6E4KWzUt9YctF9C

J8pi0jFVxH8srGYPaiS2pO+2z0DPvTjj/X/2IFdIxbgxOAOtgz/GtfQtwb9h

0vZJWgbOaL52m7ptCb7MtsCLNzKwp+GcasJtK6y1yJbKEcmE1mfRLu9pK0yU

DWm8UcuEDC/9uIneXgxfpQbUGmVizCb0F/ftvbgQpBwRSM3Evx93NBO3rNH

u+tGYm0m0pYqYg7+tsbZ6j8fhp5lIRZQX2frg1eEK+osz2ZMAvhOyl8ywbX

J8KeqfDS8X2u3Zt1cx90RHZdr1jTsVMmZKbkhh0E1Hm9Ep/Q8bA/dnzvmB3+

xoskKryjY19FyvDYpv1YbzGtxRikw8eI9X5n8X50bGOFli7SYXbVrzvYyh43

/BVaoMUAXSzwvVGgPSzMx5TkjRh4ejkjXCGPeL2Tu54bMmAI2jPbzXZo6Pt  
ukWcDwP+7VkN3Po00Ke9LSaJyUCZbm7tG2cHmFgX73+Qz8DPU6ybpdeOqD6d  
u6PrDAM08oVK2yoHzGRKfTxczQDj1+2iU6qOiHqhrJTXycB/4v2J2mudoCMh  
uLpBisBo3NcjdP0YHkpUm0UCWzr+RHZbr8TnOU1FW9uINBw+U9oUpYT+hTG  
ysX0ClzQFyI94XGGy9bCfikHAqJFoh5Fis44I9DNnepGwJVLyiXCxBI7bS9G  
PiYR6GLVshWPd4blzO2tI8EEj12GB+YcIZ2/dr0shQC2+8aG2wXdsHyLQMt  
AnQCcUrmugKbXXCwULjXMosAz4jt5itBLjByEtULLSAglkhZN9vrAu3xOXuH  
MgLun4Okny+4gOek8vv7lQSKLMLFz8m6wlZBO1iqmoCKUJzQbjdXtGfLyEfV  
EdA7m72Q0+aK1cuWCQy0EgqontzeNuKKMO7BLWHPCSiWuoYKrnDDyf1jZr0v  
CQhek/+Yae6GvB17gxM7CaTcTBN94OeG33H84mVdBKZrv+zIouoGbwGXzw3d  
BD43V9XG17rhiL0Bb0k/AZfHouM1b93gUC01FTNE40IT2obfk26ILpPT0R4m  
cOu1CStiszS6S1Rbgn8S0DbUdsi/2B0RcvtCBqYJLH3TqbjQ5I62VR2vhGcj  
xlyy+nu63aGZb12jPk/A94+Pg4ekB5oFalLrlwi8mb9PsLZ7oN/Kc56Lmwlr  
rg33Xjt4400j/Mg2Hia2rxjbYnfcA5ukg8d0+JkoF3IKzCr3gFXimoSnAkzI  
i9acaX3sgeS7X7PsVzCxQjZ5lTm3Jyb01KzbuIqJowoD5inynvCl1a90FGJi  
StkyoXGnJ9Y0bAq4u5qJHk3h7/o0T5TyBSqJrmHCSfvQ+th8TzRaGM4qizLR  
qvv0/fo1TyRSs8XVxJgwMdyZM/bCE0mC1KtSa5m4YXKuRXPEE+5trYvzHKub  
L1sKXu6FSwblhq/EmThrSdUrVfVceF7tPwUSTIjtexY2uMsLbqkbjfdJmKHY  
b7203s8Lgd5a/IMcLzjnd/skeef8HLdhthQT0R5/xIpOe0Foa/uotDQTwyQv  
m64aL9zoeH2dzTGJ3JQm8dYL/9Yb3xaQYaIjULneadIL943MNx7k2CqEMZEj  
7A2Dq1JGTRw3Royot2l6gydoUl5AlgmdmP1+gtbeWKRnCe/iuPTIDbYV1RuN  
K0JEIzmWS5J8mZnhjcljy+JzOc5LTeB/cMEb9Igd5MscC9B7jbmavBF6OmOq  
iuPEY+axxt3e2HmJ7FnB8WR2aWX8rDc+77RtLOSymi84WCNBgs3Kpj0pHHez

I2R/byOB2qCj6MGxQ9FrRx0HElQXlQ6pcfz4vP6xiHASohJWBg9z3m90qbC5  
MosEw88UjXMcV5cvzXwrI0GTsXLammO1KorWhsckSLbz3hrhzKfoegvVf4CE  
h5I8j115XlOjce4Clw+E9G7oCXFMv3Oys2edD1r5n2z+/7zH5g8nsIx9IN15  
5doM5z/cjfwU7Ug+6OtP1XPjeFOj1sHGih+M80twT3D+N39BSji2wQc7LDUu  
aHL815j7pma3D0Ql7ea8OXl4ebd9oVDWFzF8RxlFnDztWKordtrpiyBmrGAl  
J2/FpsWWgl6++JV6+sc1ESZi7kXnXP/2xZSNPqWQk89VfCy8yIV+qLqwO+QP  
J9/gXvQn5PywP0tL6fZyJmLXR+v7a/qBdUEvPITTh54Dnt2y+/xAenbRtp6X  
M5/+TWpZWX5o8Xf48GORwBeeczOBhX4YXJL4SVkgIKMs9mxXhR8Ue9RK0jj9  
zKDMR8w99UNS40Aye4azHwef1QWvPIBXd2b97k9w+s6L47tDuAKe5prboxA  
k8pNn/WbDkBQ8T/9TaME1AOKlnXtPYB9ouafYr4TmB8KtbViHsBUG0PrNme/  
nP8q1Ke2nIz+iaN9S+0Evn/fv3yQj4KVfz79cOHswz1T30auraXgkamQ199y  
AsUL6S+TlCn4K0N0ny0l4CVSy5I0o0CtjtjlfTGB57qKqjaJFNrGFDXLnyJQ  
lTJudn2SguvX+2h8mQSiXITUnr9wQx6T831JDBn1jEqVxeI01vD7PoXGTgm  
2Z1ZcucgrvctvK3bwIDurzoiqiIcNhrmhjZ2dASsYn5v1ojCD91YkZuZmYjs  
mRmO2ngIFWccjn2tzkDEW9VVFnyxeMEbOXJxMh2JL42G6t7RQBLwH0o2TscT  
gs3qbD8C+fxWHqGUNKykXg0V/y8e8tP39Z++TUUWr6DsfHkiVr4eWiWnkgqZ  
S/bJGeePYknJvdo/MQV2tzby/muYAr6htenpz5Jx9c/z7c07UqHR+nvbYM5R  
HHvednheNQ0VdRUKerQk8KVOqq3YkI6KSEXF0P2JENAXrA5SzsCHyzvt9AwS  
kj6cZtu1OhNKRJ+znWk8zpXKuq5bTUEOPz38iGEcdMliUdF/6SjwcBwTtz8C  
R3kuqvQXBIRr20Vzog9DuH71k/wBAofExRLUsmjYM5xgrPCKCVsjqh/uxGLd  
9Er5o6+OoW29gotffwwS+E52bXmeBd+1d15dFY+BU2lU6fjt40j+QcruJB3C  
M3VaX+atE/CMKyntPxONu0ZdmzVLsrHNT6s0eCIK+o7aLirHT2LPkF52gFOU  
ykpcpg5b5ECXmtAieDES0V/NLAPrczA6dDaHVzASq2RN7U0Mc6FNzvhY1hmO

AXZI/9nqXJCTP06U1oThalEouUwtD1ZrxaeDykLxLe0pu/BSHmqkn/6QOxGC  
3LpqV0m5fMC9L52VfRARppc/SyzKxzWm9WnFzGBYMOS2ZMn8A5u78XbsY0Fo  
OHxXWinnH5TW/5U4UU4Fr3vUnWLhAlC2mTaV3A0EM9XpSwW9AEVctSeyRwLQ  
oXFtkTRfAB6e50tCKgEYebTuxWwcC1SB9skzTv4wK69Xkr9noTaEUkz6l5Pr  
cwKVmydZePNzK8/GAgq0WM7bjKdYcHtlPDyVS4F8+qiZ9wwLMycf7cnOomDO  
W8n3NBcbYiOyNi1HOT0QOXZKYg0bxUWFJMcAClSOeKwW1mHjs9tl4ec6FBSG  
Xy6Q385Gk//EqrKtFlgG/JLbosfGjN69ExmaFHA5ntCwNWRDpflfaVM1Cj5p  
NFtl7WJjt88Tt3ppCli96ukCTmwwl3/xesJFgVBn7EpJFzYeJtMZVxblyHh+  
P1fNjY11Te66eXNkRNd5n9/txUavhIkkaYoMu/ycxnQKG0euNkzMfCXjEfOT  
RX4AG/QfhZp9g2QYpWx6XkxlQ+LXsm9P+sjYFPbwQ3MIG+GfpL8UfSTjAmUN  
uT2MjezUM2qM92RIefp8+xzBxkCEy3DUWzJy7Csix6PYYBGaGqQOMgQsZ/4s  
HWLjXYXQmNVLMv4HKeRKjg==

"}],

{RGBColor[0.560181, 0.691569, 0.194885], AbsoluteThickness[1.6], Opacity[1.],  
LineBox[CompressedData["

1:eJwV0Hk81AkDBnBZUtS4GeUoI2liTS2]6feQJvUiR7QJtRMdkquMiAiZGFMi  
88uR+/g5StnU0qnL66Va09LS0HZlH0Ssm9b7x/N5Pt9/nj+e5dxgN39pKSmp  
8Ln8v22GXw6FKkoRUIKe15mkmp36XO/Vfl43Yad3T3jUNZWI/a/00WreVyKw  
cu1Lunk1wfd7zxmijxLMlzOz5ufvEc/fW+1I5c0QCm0IejDQQghqm66qBkhj  
gSTx2fb6dqImLMzyDX0+nDgljHUGr4kXLJ27V5oW4uCstPRKrV5i7HuTfTRv  
MbwjPhwbC/pCCHfV95akKyFOsjN2p8MQkV9Pq1AIUIG89+Tah+x/iGtafoFh  
tmqAYX4TVzRBPIysX91J14CvWujxLpdZor2TNkwMaqL58fcffXXz0Gfld60s  
SQs7XYdaj8JkoDBJYx/j6WBykqHsGckPbS8/qVdOelAp2KuyqXExNLslbwrS  
lyH+0PTI5TIKMGazSuUC9GGWfyTqmJsaWF8l8295MBBnGSRd5awB60v8g0G2

BngwWz20ei8dTjMSZjvdELodRo/HG7XheZkvPCNjhE/8qDeUsh72+LC+WQ8a  
IRK5kfcbliH0Dr+2qMkYF9b0V262YSAzhmUVwjOFsGioy7p2JfJMu7MZXD0o  
tAs9eg1NUNbNn+5wWo2Rkd4n6SVMSPiGXuelm6PslvIrVIMZBmY3FcsGsBBc  
aJKcWMaCyr0B4xd0C8x0tEvyJ6ygofoq/qsBW66ssJnRjZgaXCWIEnGEj+2  
dNFHhq1hoGf/1WrQEhqSxvClATYsYrOuFjRZ4V3qCpH1Ult4EfaWQTw2PFQX  
mw4UboYZ3yRvzSgbTDl+iyeHA+nnSrL/hG/EHZPugcB+Dqp8u8Unwgl4yH9+  
xGc7YHaj9U37BqC/8EfGg+/b4OL7p5tbvR2EA+ufDru6YCR3fsqRmxw8GXM2  
XRLjCeslh8eLf3PGq84W77u6XDx6Gz649ZszAhu3xv25gwwHqriP30y2Y+LF  
/hvyAi58bUR/WRdtRxV9x/r2MS5sa/ZKDjm4oJQnLn4h3ge/NsHteZauCAs5  
s/yns/6oVH8bvUbNHRaRz/Jm1A/BIu/sTNozTzgyPRUME0QdOtcR4+OL3o6  
fVSHQiLw+fP2Be9l9yH1ncKnd/+JxaSteEC7fj+WOXTHizYkIEVTcrr4VgAO  
uE/9VDmdhJ+H68+EVgVhwbepaaYgBf6Lkj83MkNxaVA83X9HiJCe8Y+hxkeB  
D5PmKSlpCG5fscheNhxftNet8mnl/q5TW/9Sx5y9D540HgZaD5DijrajsPV  
/oJl9tAFyB+oCVSvjILW/QGbdl4IAhmFpVMV0TjWle3kWUliSalLbGLBSdT0  
6Xosm7wI5zpjmySb4vBxoV1znVE2asZa1zWuPwWL5s/0cm4OUlqfRUytiEdt  
LC0gLyYXsqe+Gy40SkBcjSl5veQS5CwVrh1kJGJV16P1rFt5SliNd+qknUb6  
7odVXnX5yC9f6qlDS0KVOu2rlU8BfuaqhobN/XBipnB/srgAbrpSB7Q+8DEx  
Mtp70LYQig205ox3Z1C7anOydv0hOB9PsPX+SibI7L7/Vp0i6IzK6578IwV9  
jR3c9uQinJA912nWKOByyFp5h8EiuJeHlg/eSIW+o3Cvo2MxWlby3pyuE2LF  
11y1PdXFuGvTabqq+CzGdvHE16RLYom2xsMg9RzE5/zeO+woAVXsMRJhnwYl  
Y497gooShPXZbntfklbqghgNxmgJFi0IXDZuOI/norh7ipxSvCMPv827dh4B  
y41PvBWW4mSmCpcyTMfdQ7Y3H7aV4lP8/8ic0nT0+JfMUPQynK+/5qmpnYHr  
HfPn7f6lDAv/rmiJzp3zA7Ws5uwy2P01zQRLlMdmz0s1urMMtyPuaumnXUck



4DrjqXI5ZH4JvVWkmAmnLFq+yLEcyafcP1QlZSL2Wwr/0KlyijlXZ32mMsFo  
dMvx/K0cXx7rPJ2IFOHiq8qp2L5y2FY0G0gOiiC9J1HfW4PC7/ly1abfRejf  
GxVrrEnBXLrjLXtEhNvclw2jc9ZNGLD1HhdhX7ikNU2LwqS3/p5sKRI2dpd9  
H2pTqFVKydJQJhHYbrNRn0HB4PgumiKLxNqJy6pNqynkBJVl6q4j0U5nOaSZ  
U1DxH9Y2syDh09q6e9caClJuQqbTBhJ+aruXfWFR6GY2Ogjs5vZNg/UWW1AQ  
vV6ZIOdOIqhCfXKbDYXFHeHymh4kyvxj9FXFYFBjH5w33EmiZ5uLSeecw+q9  
CzbvJnG2zvGv/QQF54y0Own7SLxRWnclzo7C4+Ru+wx/EpNayWLOJgo2cSat  
RQdIXBid7VhkT8HkyKOuxsMkWhR1Yy5uplC4T5nbdoTEeN5HPV80BbqX76e/  
g0mMPfEpYmyhkOZSFTIYskKrLV7m05zltoyP/ThK4sp8H84VBwr/Ag0PZQY=

"]]]]},

AspectRatio->0.6180339887498948,

Axes->{True, True},

AxesLabel->{None, None},

AxesOrigin->{0, 0},

DisplayFunction->Identity,

Frame->{{False, False}, {False, False}},

FrameLabel->{{None, None}, {None, None}},

FrameTicks->{{Automatic, Automatic}, {Automatic, Automatic}},

GridLines->{None, None},

GridLinesStyle->Directive[GrayLevel[0.5, 0.4]],

Method->{},

PlotRange->{{0, 1650.036}, {0, 3679.102255}},

PlotRangeClipping->True,

PlotRangePadding->{{Scaled[0.02], Scaled[0.02]}, {Scaled[0.02], Scaled[0.05]}},

Ticks->{Automatic, Automatic}\) \!\(\\*

GraphicsBox[{{},

{RGBColor[0.368417, 0.506779, 0.709798], PointSize[0.6], AbsoluteThickness[1.6],  
EdgeForm[{GrayLevel[0], Opacity[0.3]}],

{RGBColor[0.368417, 0.506779, 0.709798], PointSize[0.6], AbsoluteThickness[1.6],  
EdgeForm[{GrayLevel[0], Opacity[0.3]}], PointBox[NCache[{Scaled[{Rational[1, 2],  
Rational[1, 2]}]}, {Scaled[{0.5, 0.5}]}]}]}},

AspectRatio->Full,

BaselinePosition->(Scaled[0.1] -> Baseline),

ImagePadding->Automatic,

ImageSize->{10, 10},

PlotRangePadding->None\) blood

\!\(\\*

GraphicsBox[{{},

{RGBColor[0.880722, 0.611041, 0.142051], PointSize[0.6], AbsoluteThickness[1.6],  
EdgeForm[{GrayLevel[0], Opacity[0.3]}],

{RGBColor[0.880722, 0.611041, 0.142051], PointSize[0.6], AbsoluteThickness[1.6],  
EdgeForm[{GrayLevel[0], Opacity[0.3]}], PointBox[NCache[{Scaled[{Rational[1, 2],  
Rational[1, 2]}]}, {Scaled[{0.5, 0.5}]}]}]}},

AspectRatio->Full,

BaselinePosition->(Scaled[0.1] -> Baseline),

ImagePadding->Automatic,

ImageSize->{10, 10},

PlotRangePadding->None\) liver

```
\!\(\*
```

```
GraphicsBox[{{},
```

```
{RGBColor[0.560181, 0.691569, 0.194885], PointSize[0.6], AbsoluteThickness[1.6],  
EdgeForm[{{GrayLevel[0], Opacity[0.3]}}],
```

```
{RGBColor[0.560181, 0.691569, 0.194885], PointSize[0.6], AbsoluteThickness[1.6],  
EdgeForm[{{GrayLevel[0], Opacity[0.3]}}], PointBox[NCache[{{Scaled[{{Rational[1, 2],  
Rational[1, 2]}}]}, {Scaled[{{0.5, 0.5}}]}]}]}],
```

```
AspectRatio->Full,
```

```
BaselinePosition->(Scaled[0.1] -> Baseline),
```

```
ImagePadding->Automatic,
```

```
ImageSize->{10, 10},
```

```
PlotRangePadding->None]\)      gi
```

```
(*-----Next Mouse -----  
-----*)
```

```
vn=readTac["C:\\Users\\exx\\Downloads\\OmeM7, liver 3.680125, GI 1.215625,  
ID 4292.csv"];
```

```
Lv=3.680125;
```

```
Gv=1.215625;
```

```
id=4292;
```

vn[[1]][[1]]

{{10,129.333},{30,304.535},{50,91.7454},{70,41.511},{90,26.105},{110,20.1649},{130,18.3372},{150,16.1955},{170,16.0087},{190,15.6567},{210,14.1132},{230,12.6865},{250,12.4322},{270,13.7204},{290,12.515},{450,10.4058},{750,6.01375},{1050,3.70611},{1350,2.41708},{1650.05,1.71719}}

model= mouseModel[Lv,Gv,id,33]

ParametricFunction[\!\(\

GraphicsBox[RasterBox[{{179, 179, 179, 179, 179, 179, 179, 179, 179, 179, 179, 179}, {179, 180, 180, 180, 179, 179, 179, 179, 179, 179, 179, 179}, {179, 179, 180, 179, 179, 253, 248, 179, 179, 179, 179, 179}, {179, 179, 180, 179, 179, 248, 248, 179, 179, 179, 179, 179}, {179, 179, 248, 248, 248, 248, 248, 248, 248, 179, 179}, {179, 179, 248, 248, 248, 248, 248, 248, 179, 179}, {179, 179, 179, 179, 179, 248, 248, 179, 179, 179, 179, 179}, {179, 180, 179, 179, 179, 252, 248, 179, 178, 179, 180, 179}, {179, 180, 180, 179, 179, 248, 248, 179, 180, 180, 180, 179}, {179, 179, 179, 179, 179, 179, 179, 179, 179, 179, 179, 179}, {179, 179, 179, 179, 179, 179, 179, 179, 179, 179, 179, 179}}, {{0, 0}, {12, 12}}, {0, 255},

ColorFunction->GrayLevel],

BaselinePosition->Bottom,

ImageSize->{12, 12},

PlotRange->{{0, 12}, {0, 12}}]\) \!\(\

GraphicsBox[{{}, {}],

{GrayLevel[0.55], AbsoluteThickness[1.5], Opacity[1.],  
LineBox[{{9.09090909090909<sup>-8</sup>, 9.090909090884856<sup>-8</sup>},  
{0.0874367476365131, 0.08197166587636243}, {0.18222810297558026<sup>`</sup>,  
0.1358255024317191}, {0.27073779576926765<sup>`</sup>, 0.13315455086535802<sup>`</sup>},  
{0.3575112797365835, 0.08143316377978886}, {0.4516394623155443, -  
0.007347854733426912}, {0.5394859823491253, -0.08816932746972758},  
{0.6346872009943513, -0.13787329990112937<sup>`</sup>}, {0.7281522108132057, -  
0.12816574147938434<sup>`</sup>}, {0.8153355580866803, -0.07001063326902106},  
{0.9098736039718, 0.02121659675083076}, {0.9999999090909091,  
0.10024804094746914<sup>`</sup>}}],

{GrayLevel[0.55], AbsoluteThickness[1.5], Opacity[1.],  
LineBox[{{9.09090909090909<sup>-8</sup>, 9.090909090880112<sup>-8</sup>},

{0.0874367476365131, 0.08090369567458766}, {0.18222810297558026`,  
0.12746559200130417`}, {0.27073779576926765`, 0.1116266937044405},  
{0.3575112797365835, 0.046963725126600256`}, {0.4516394623155443, -  
0.04509050859182233}, {0.5394859823491253, -0.11115559892361665`},  
{0.6346872009943513, -0.12642564594664163`}, {0.7281522108132057, -  
0.07740196037964171}, {0.8153355580866803, 0.004179083230780074},  
{0.9098736039718, 0.08937493944143977}, {0.9999999090909091,  
0.12834702174618903`}}},

{GrayLevel[0.55], AbsoluteThickness[1.5], Opacity[1.],  
LineBox[{{9.09090909090909\*^-8, 9.090909090875369\*^-8},  
{0.0874367476365131, 0.07984396759533968}, {0.18222810297558026`,  
0.11939549826670079`}, {0.27073779576926765`, 0.09184904274707059},  
{0.3575112797365835, 0.017913117173780694`}, {0.4516394623155443, -  
0.07109962300031061}, {0.5394859823491253, -0.11717052830989395`},  
{0.6346872009943513, -0.09879571259704382}, {0.7281522108132057, -  
0.022693471356141894`}, {0.8153355580866803, 0.06128703302641453},  
{0.9098736039718, 0.11605625481609519`}, {0.9999999090909091,  
0.10415981267620744`}}}],

{GrayLevel[0.55], AbsoluteThickness[1.5], Opacity[1.],  
LineBox[{{9.09090909090909\*^-8, 9.090909090870287\*^-8},  
{0.0874367476365131, 0.07879243663407876}, {0.18222810297558026`,  
0.1116081822210312}, {0.27073779576926765`, 0.07372482040530459},  
{0.3575112797365835, -0.006267252216927747}, {0.4516394623155443, -  
0.08743897872291118}, {0.5394859823491253, -0.11109134853087661},  
{0.6346872009943513, -0.06371549528296311}, {0.7281522108132057,  
0.02544576624054603}, {0.8153355580866803, 0.09464282937855747},  
{0.9098736039718, 0.10731931496853601`}, {0.9999999090909091,  
0.0516787429232188}}}],

{GrayLevel[0.55], AbsoluteThickness[1.5], Opacity[1.],  
LineBox[{{9.09090909090909\*^-8, 9.090909090865543\*^-8},  
{0.0874367476365131, 0.07774905743802465}, {0.18222810297558026`,  
0.10409673959866513`}, {0.27073779576926765`, 0.05716133039337165},  
{0.3575112797365835, -0.026084496726167965`}, {0.4516394623155443, -  
0.09591154799603378}, {0.5394859823491253, -0.09685594593277226},  
{0.6346872009943513, -0.02730376120671303}, {0.7281522108132057,  
0.061646715198529656`}, {0.8153355580866803, 0.1046634148537508},  
{0.9098736039718, 0.07509702498429204}, {0.9999999090909091, -  
0.006536873471333553}}}],

{GrayLevel[0.55], AbsoluteThickness[1.5], Opacity[1.],  
LineBox[{{9.09090909090909\*^-8, 9.0909090908608\*^-8},  
{0.0874367476365131, 0.07671378556951527}, {0.18222810297558026`,  
0.09685439581479163}, {0.27073779576926765`, 0.042069810325321415`},

{0.3575112797365835, -0.042006785469922474`}, {0.4516394623155443, -0.09808544986431629}, {0.5394859823491253, -0.07760167026270944}, {0.6346872009943513, 0.0063643674428021085`}, {0.7281522108132057, 0.08405712128907425}, {0.8153355580866803, 0.09555213349985489}, {0.9098736039718, 0.03202960165577907}, {0.9999999090909091, -0.054402034659985464`}}}],

AspectRatio->1,

Axes->{False, False},

AxesLabel->{None, None},

AxesOrigin->{0, 0},

Background->GrayLevel[0.93],

BaseStyle->{FontFamily -> "Arial"},

DisplayFunction->Identity,

Frame->{{True, True}, {True, True}},

FrameLabel->{{None, None}, {None, None}},

FrameStyle->Directive[Thickness[Tiny], GrayLevel[0.7]],

FrameTicks->{{None, None}, {None, None}},

GridLines->{None, None},

GridLinesStyle->Directive[GrayLevel[0.5, 0.4]],

ImageSize->{Automatic, 28.4375},

LabelStyle->{FontFamily -> "Arial"},

Method->{"ScalingFunctions" -> None},

PlotRange->{All, All},

PlotRangeClipping->True,

PlotRangePadding->{Automatic, Automatic},

Ticks->{Automatic, Automatic}] \) Expression: {Bl,Li,G}

Parameters: {k1,k2,k3,k4,k5,k6}

]

```
Manipulate[Show[ListPlot[vn[[1]],PlotRange->Full,PlotLegends-  
>{"blood","liver","gi"}],Plot[Through[model[k1,k2,k3,k4,k5,k6][t]],{t,0,1500},PlotRa  
nge->Full,PlotLegends-  
>{"Blood","Liver","Gi"}]],{k1,0.001`0.2`},{k2,0.0001`0.1`},{k3,1.`*^-  
6,0.01`},{k4,0.001`0.2`},{k5,0.0001`0.01`},{k6,0.0001,0.01}]
```

```
Manipulate[Show[ListPlot[vn[[1]], PlotRange -> Full,
```

```
PlotLegends -> {"blood", "liver", "gi"}],
```

```
Plot[Through[model[k1, k2, k3, k4, k5, k6][t]], {t, 0, 1500},
```

```
PlotRange -> Full, PlotLegends -> {"Blood", "Liver", "Gi"}]],
```

```
{k1, 0.001, 0.2}, {k2, 0.0001, 0.1}, {k3, 1.*^-6, 0.01}, {k4, 0.001, 0.2},
```

```
{k5, 0.0001, 0.01}, {k6, 0.0001, 0.01}]
```

```
Clear[newmodel]
```

```
newmodel[k1_,k2_,k3_,k4_,k5_,k6_][i_,t_]:=Through[model[k1,k2,k3,k4,k5,k6][t],List  
][[i]]/;And@@NumericQ/@{k1,k2,k3,k4,k5,k6,i,t};
```

```
fit2=NonlinearModelFit[vn[[2]],{newmodel[k1,k2,k3,k4,k5,k6][i,t],{k1>=0},{k2>0},{  
k3>=0},{k4>=0},{k5>=0},{k6>=0}},{k1,0.008`},{k2,0.0001`},{k3,0.0014`},{k4,0.001`  
},{k5,0.008`},{k6,0.0001}},{i,t}]
```

NonlinearModelFit::eit: The algorithm does not converge to the tolerance of  $4.806217383937354 \times 10^{-6}$  in 500 iterations. The best estimated solution, with feasibility residual, KKT residual, or complementary residual of  $\{1.45906 \times 10^{-10}, 0.01392, 1.05692 \times 10^{-10}\}$ , is returned. >>

```
FittedModel[newmodel[0.0576059,9.01088*10^-12,<<22>>,<<23>>,0.0859494,4.29218*10^-12][i,t]]
```

```
{fit2["AdjustedRSquared"],fit2["AIC"]}
```

FittedModel::constr: The property values {AIC} assume an unconstrained model. The results for these properties may not be valid, particularly if the fitted parameters are near a constraint boundary. >>

```
{0.901196,746.089}
```

```
fit2["ParameterTable"]
```

FittedModel::constr: The property values {ParameterTable} assume an unconstrained model. The results for these properties may not be valid, particularly if the fitted parameters are near a constraint boundary. >>

|    | Estimate       | Standard Error | t-Statistic   | P-Value     |   |
|----|----------------|----------------|---------------|-------------|---|
| k1 | 0.0576059      | 0.0140318      | 4.10539       | 0.00013747  |   |
| k2 | 9.01088*10^-12 | 0.000584707    | 1.54109*10^-8 |             | 1 |
| k3 | 0.000965695    | 0.00022986     | 4.20124       | 0.000100113 |   |
| k4 | 7.26937*10^-12 | 0.0021556      | 3.37231*10^-9 |             | 1 |
| k5 | 0.0859494      | 0.0213064      | 4.03396       | 0.000173761 |   |
| k6 | 4.29218*10^-12 | 0.000288437    | 1.48808*10^-8 |             | 1 |

```
Show[ListPlot[vn[[1]],PlotRange->Full,PlotLegends->{"blood","liver","gi"}],Plot[{fit2[1,t],fit2[2,t],fit2[3,t]},{t,0,1501},PlotRange->Full]
```

```
]
```

```
\!\(\*
```

```
GraphicsBox[{{{}, {}},
```

```
{RGBColor[0.368417, 0.506779, 0.709798], PointSize[0.016666666666666666`], AbsoluteThickness[1.6], PointBox[CompressedData["
```



1:eJxTTMoPSmViYGAQAWIQDQEqDkqh+RlLtRlclHw7h9xrWtwTOlqhfE+H+9eO  
zN/yPgzCbwh060xabJFx0AXKD3Mw+STH81DKCsqPdijeNOu8qZYJhO+Q4DA7  
8NaOwDAjCP9AkkOg9JosfiMDqHyqg9alr9pWTFD+gXQH5zMLZcwD9KHwWQ7r  
JebpvLfUgcrnOCTo8pyui9eEyuc7xPmsX+J+VwPCf1DgwDc35czNA0IX6HI  
QWbbqfkb2aHqFWocaiy+2p84rwLhF7Q7iEQuviTMJwHhZ0xwqMqf+kl2GS+E  
LzHVwVH/fL9eGLPD3qBpinonZjrkzgvVmV/52x4A5Z1Yyw==

"}],

{RGBColor[0.880722, 0.611041, 0.142051], PointSize[0.016666666666666666`],  
AbsoluteThickness[1.6], PointBox[CompressedData["

1:eJxTTMoPSmViYGAQAWIQDQEqDn/OeTwvaDB3gPDtHP69eHowfXECIO/pIM86  
c93GxnwIvyHQQXjnA566vmIoP8zhck6lw5eppVB+tMNMtv6G2+/LIHyHBicO  
m8nujXvKIfwDSQ7P9mxlqjSvgMqnOmy+F9fRfQrKP5DukBYusPM9eyVUPsuB  
u2RSUKk1lH8gx+GsUPAN6yaYfL7D/R/1VRYnoPwHBQ6P1P41J3tXQfgKRQ6R  
v61vK0fC+DUOsRcMr/XGQ+0raHfQU3sz8Q9QHZifMcFhp+7tGRou2RC+xFQH  
1kqdnD3TUx32Bk1T1Dsx0+F+1B1T8VWJDgBRKGRB

"}],

{RGBColor[0.560181, 0.691569, 0.194885], PointSize[0.016666666666666666`],  
AbsoluteThickness[1.6], PointBox[CompressedData["

1:eJxTTMoPSmViYGAQAWIQDQEqDh/Praydu0zfAcK3c7A5mW9Skhk05Xs6zD35  
1tfpZxSE3xDo8MnyoEflrEgoP8xhfnidYHRJBjQf7WB1+A678zYo3yHBoXe5  
/ISPJKj6A0kOXkuU8/NVoqHyqQ72dapurF1xUPl0hxlNt0RKKhOh8lkOcRtS  
nTt2JEPlcxx2a+90MEhNhcrnOxRlX8r1/AflPyhweLn4eeFnljQIX6HIYVr5  
Vea03elQfo2D/YQ9xRmzyyD8gnaHBz9M3961aYfwMyY4u07m0qwPmwDhS0x1  
0J2m9PNWx2SHvUHTFPVOzHR4kNrW2zRtqgMAHpJhdQ==

"[]}, {}, {}, {}, {}

{RGBColor[0.368417, 0.506779, 0.709798], AbsoluteThickness[1.6], Opacity[1.],  
LineBox[CompressedData["

1:eJwUWHc8le8blozMkCQ7ZBUVQsrz3vbe29n23nuecwhRikqUpCLpK2Vkp6WS

kSaKohIZIRU4/f+/vK5Pu957vu513Vfj12eYQ4+rCwsLE1cLCz//3vk5+CP

iK0s2NXttzTMxc7C6Mmvt2djP2A8E2v/9d8/DWldklHVsd8xrtz9iyEpBZDI

PW7yQ3QJ+8w86dFqkw/944ecjseuYfvy3jp6apyC3Lqnt7cFsgLB8NWMvVMe

3IqM1P4kygF7MNNDPV7HYXnxqVFyLB98HKrb/mc0G064t3wtLxCA10NPNrWb

ZcGlFv4qnkAhWKLt/XO85yjU7vQOjtQXBo/fpZl3fTPgUULLvneiInChp23r

PdF0ePuO/ye2sANKnpXwSY4xYPKQd+O1pzvhEHbnSXwbHXhW+PWiyYVBZqXv

gbFDCkh4eLMMW0uDV16lNBaZBDs+jHwqK5CBIBKH0pnbCSBzIsvQKXUX3Aua

M3TijQdlPfUKzkBZ2N4V+OwyMxbUv49wtDnLwWIEu7CkUAwcvpjIH6ovDxab

H6wptkSB9drInreiCiBWNW7LbhYBLjezTmSzKUL905mDEqrhQCGpzx9eUAR+

Fq+8fLNQ8Of7YDc/rATnt8i+7HELhoi7WXVXniqDgOelHa3ZgZAYoi7sUq8C

sTbnTzoN+EO65lcYrkt7IKVtdL0Z84OzKeqHwmNVgVD7xWGQ7A2lqh/Oy3mq

AQIM/rgJesG1D1mrA9b7oLsr48X+dzQYMTm577HEfnBIvhiw1kCFkdK50dKC

/VBl/ePCLxMKjC09OhW/5QA43CYkTZuQ4KtNsb5D6gFQ43r+usSPAHPrhlfZ

A9WB2xmLZ93sBosuO51GR9VBfnNMz3SCCyzXzLG10GuA74rtgZ9cZrDK0Xmn

oEcDvj/Z9PNorSOwUIp9g/U1weDIXnWpMAdgawrdYdKkCU6FQ1VO+vbAtdWo

S1r1IMS5K1UPKdiB0L055deiWpBouK752toKRHZ0vq/00wL3kvOlkakWIB5W

nJvJpg2q8cZizb1mIPM09Ag1URt4dixvbdIyBXlpo++HFrTh4y6V2zWtxqAU

t7N0m680nC/aYffTxQhU++dsvg/rAPI/lbTMZQhaacW3y54eAufVltGMGgDd

wVBAop4u7DD5+eudLgbYPiMhp3pdMC/s7y84rAdGWTsfqSofhszGR0ubSIfB

bHQuivPSYbhzvG19y8VDYKXdKf9J+AiwXvRWafqrDfYni9+25hyBZ/f3GmpF  
aIEHZqQdGqsH4bKqplkqDVDLUik9sKQH4spnYoet1YG1X4D9dwyCk0mU8i9c  
B2BAZDmo+TeCp6YDe0ub98F/5A+vkmIwub4z/FM1SxXo1x4dwn5jEDj+jjcn  
eQ+oLDvZMXQBYHn2F2+hMqyjw01GrQCGv+7vurpHAb551gQqrADo29Zw6V6V  
h1eZu6S26OpD8xx/4a+DctB+48zLqQR94BuYOjv3aRdUPuc82tOiD7NhHmzB  
FTJQsjioc/OvPvS9v5J5dk0KkkXmZvIOGcD7d3Kugu8kwI78xsGhxQDKdFvS  
1DZEQZdpyqH51wBcU/Ys3DfaAfLXWlu2HzKEj0YCV75d3w783aohy/GGEH1B  
tThXWRj+fi+TeddsCP3xIa9vdgrBuKDwm9Y/hnB93vxaarwgPD+YlVWiYwRX  
rkdeNDIUgCspIXOUZiPourS5elmNF45fHrus/8clziu/aZQ/wg2xjx2d5XSM  
oWRLlFN30BagTj3Zwh5vDBFiz5/mtXGAJZ9u+0STMQw6YR8PKLOD1oGbYV3L  
xtCnl9lXVbcZZjxl5G5om4BtA8/SZhdW+FXCkRPSZAj53dQ3D55sYB/vj+jz  
LpvAkYd921zOrGFd47ML+7VN4cMluTvd2f+wui3UcqE4UzCivzSMuvwXu7j3  
teuvRlPo3xvc0ju8jGXbmfAMLJlCru6urvSDS1hkdEtHk5YZmKa/IIVU/8JM  
2i/tTmo0AxvWV8cmp35g+8eE3hGXzOCgyGD5QPUCJsaWeRxpMQMWLjzlyzOP  
sSn9xWRizeFU7K2XM19nsXnL4J+bGs3hWKC8R+TENPY+bPTal9/mOGPE+GTP  
PYV1nnbweHzQAq59042QsZ3EioZ1HmTfsQDW/PTgbPVxjLnX3Tgbwvg4XrE  
w9P3GQuWk1ayOmgJ/Gy04mb0T5iLacGwaowlVBlmyWdYjGH6Qewnt96xhABX  
wxQPp4/Y3pPxBj9+WYKshdiZrMMjmEj9z09XmlZgPqOR9tb0PTa98pJY2GAF  
G4C9uvV4AHsjZSwQ/8sKnvzc96pM/S3WYdD8yF3TGnQuyp4Jb3uNXffdE3c4  
2hqCOAuv7Se/wgpySIUkG6wh30ZfRWTnSyy5RvDj+k9rSPptYz/7ph/zfZWR  
P6Zha0P+RQHMy33YYbGgP1frbSDF/07sh+pnWOfnmAXzeRvoFFj8cmJzF2b1  
H/3bvlot6Pm8nbsX8wR7G5U7dtbXFqxYDjbd3vQYIx8pHDp8xRac1Va/NlY8  
wibZLr/49MEWVvf45ehRH2LNE87jj3jtwDK7cWBw3wNM/xZ1JMDMDr5f1GbW

CnZgmdt8h4742kHw6G56kXQ71h0X9GZrhh3cMCF43LFuxfhHwl98vmwH9PEH  
V9aKmzEHIO29c880loq5TajYm7DC8qSu7A928EE75ar50TvY8BZGJ+GfHXgY  
DpT3yDRg3i9z2zdp24OElMKm9Au12PWD+c1vnOyBnnnh3+u429j34sKGykh7  
aN/Fb8zzvAZTX79wO/GUPWjNxi170l+NxXperrausYe8rNCw5MUbWOuTa9dl  
eu2hUJpncbtmFbauUl3+c8oeXJ6dtDhfUill/WwsKd7tABblIVtGS8uxXtf2  
omBDB3j4alLG2vwqJtD+4AxGc4B4ZovKc64rmJPM01NCaQ7g8nN9ffVjGVaU  
0Xv8a4kDzLawqf0fvISNfHuZ3dzqAJqS97fqZ1zEdlkPZuQOOUBGTuRjiwsX  
sBvbPycfEHaE5y8vRRsqFGFzCZPxbOqOoLJyRE2rsBDT+DgbPWjrCGdssx4J  
yZzF4g0Ww2+E4N89lwYkHp7G2q8tB6fkOsLRi9ZLfYkFGAvPmr9dlSokaIe  
qzPLx4zCWH3knjqC+Nb3+ygqp7A+bT7SM1YnyD6z87qR2XFMqETIvUTGCeaH  
5o53ROVgLiYizmHICVjH2M8cv5uNnfeWtDcgOoGWFVd5u1wW9rFL1np7ohMw  
0ial/cuPYrKqSubfzjnBz0ZD6XG9DMwvX9W47Y4T9FU2vy2aY2IL7jp6tB90  
4Lf9x/aKk3RMs0PvkOZWZ8AkPG2vrqRiCbKGBzlVneFFzr7k8L/JWEem2YH3  
Fs4QVzPUHbszCWOdsVa96e8M+qdJR0+7JWAmto7K9ExneHs94XNtQxyWU++2  
27HcGS682sa1sScW25bsJfl3FD+f0cOr4ROFuY357+xdc4Zf7yQdvsIFYiVG  
odsvibtA9LbyhuDlcGzsepRg5CEXmJ3Z5NXUHobJ8yXwGbu6wM/dT/et1IRg  
/hGpXKIxLLAuerbN/FEQdvNtOvtMgQuc0bF/Rl40wLRK89ZOPXeBp79WTBYb  
fbH/rixqPp/B7Rl/COw29sFkKl2CebhcQXb2wOC2WS+s8L/Wq2YKrvBfh+s3  
9+ueGM9tqeGjqh7Qemz/mFICDaM3MIUeUV2Bd4NopUaiYkvNE+Ysqa4gffHj  
MeY1Mjb2oKY5sdkVkuam+pc/eWDOT4QWmt66QlbtOdim6o51d8cq/l50BTNt  
Z44/p10x6H9PVhdwA/Oau1ZvhV2w069RYZiqG7yeJNOWbzphKkNX+qot3PB5  
zXeaJdliZSMc7NN+bmDJ5VZzUM4By/n6PMr7ihv0FbMX9b+wxTam1P+7fM8N  
mmdyZp/3WGPrc4WfP464wVLsQHxFpCU2vbiyU2LFDXirHXQUZC0wyjLZ3n2H

O4hNuElFJ5hbb/49zC7UdAeVb/kRnTMmmAWL4v3X9u5wpLzrkXWcMabJNa9m  
c9wdApsiEjtfG2BVfI6+uVXucNdLf+rdZX1MSqjpYtcTd2jMfW1pmw7YGRHx  
t+zj7sByaVpv8jvCuMTTeA03eUDKeY1Gp+UjWkr0F006lAfQ+bwEamQOY7/k  
TJPuHvaAoEx/hdd+h7Cpe7dOa8d6APWqWAvFTAtzPBC1K+a0BzC0Di7ZfdTE  
ug40utXd9oA02uQ/tVwNDokePjXf5wHFf0f7i63VsXp06eneGQ84euW8hY78  
AUzJcPNGwBYCsFM7Ler49mOlpn5albsJ002/5n9FUA3fj/sqdlEJOFamypNN  
UcHWnE6PkFMIYEI/cWxTvRIW6b68reQ8ATS9+JMqdili30gEy3dNBLianLTr  
RdVujOR5jynylgAH6G7tH83lsVe+cq20iWTY9ez+My0WocwsK0vHqa1E4FnA  
Xsb37MLUo22pPBZEUmvZ0mukLY1VxtefM/Mjwskm7qptRyQxiZQd/UcziKDs  
0mliQhPHChjHI8uEyFkH9tju/KdGGfmqB7LPSJ0243IPt0siiXnGMbojRBh  
/xXp2vwUEWwxr7l68S8Rxm9rc8glbMdGzoWJ/9YgwZ9DxwCLE4Qw+5LXDur2  
JOAd9BXJshbEnpRp54SFkiDyK80iVFMAO1Jx4UF1LglWB/IKPD34sdqqjT9T  
10ngUzxRGx3CiyneUe01XfEKc70PM1MIL3FhJ3VM/7y8kkM2Qlsmf34Jltp0c  
+ChJBv/fjTMWo+zY/L+4pEI9MtidnryrSGHD3I5QZwxIZBBYvJcQ9pcVe5Bs  
9pg9hQycHsQqhepNmMrd/YF3S8iwsP8Muh3Dgp1eE90a004GjfavQxpV62hV  
b1PD3hEyaL5vrBjNW0X9HS/XLohTICTFPNH9yR+ks9FyxfEwBfRpleH225bR  
FeyKKQ+BAtZHVmNMU38jHnr07MNEckikZy1Jsf9C0fcj8xPPU+AMpX78fsUi  
+sBC0FJvpQDfjTvuCPIPZKJvODz1jgl779U63VBdQLyfhVU81JB0TTBX2fb  
LIJN697ZELQIWux0aVKYRjG7IrW991JB6oTENCvxG7qhP8EFR6iQc+SS+o/b  
E+gJzWNE3IoKfEW7frnKfUXbmM9rlglUaNOKX+St/YLMrhgwXgdRAXty79p3  
18+o9rOKQm4uFbRzF2+S3o6iCdZL3wvUMFzTvpeQeUHJCa3rcfgPyrkFrFx  
+JQNI1vDrItSbVT4URjPznn3Hcrw+he20k2FDA/V6uKVQdScHmYw8J4K3BkU  
Sz7XAft96hfhumkqtJTY3Eh48Qa5jPe0BHDTQMBy70l5oVcohW2OG4vRgl0t

cK/H4At0T76BvEuFBu3JkxLmXv3ol5HSgbVDNNjouZpvAX1Iyadk8ztzGlzs  
EwzdatiDSEcFBhrcabDu9tl/zv8ZKqjluH4qgAZT/WeFZG89Rf++BlubHaPB  
VQv5XQOnO9F+jk/S8sU06Ot4eOmJ2iPkrc8uHGdBtwR1Y98Pz9AxSbPOueb  
aeBWrqTeV30fPffVO9fURYNnodzjW0Xvldas2oDTQ/j9ImtMBtfakXbl7iNh  
32jQoT5Uc2dLGyqb5PuksMUTnGIKYr0ZTegNJ70eVdQTPsZU/0v9cQdxKS0d  
/ajoCZwnx09WJTQgZBbo1qrtCfQPLSZR4vUo0v+jSqGpJ4SuVQq6va1FldkO  
axGuntCeo/L5dcVtNHL9Sb+1nyfIGSY6Pha5hYynaqLZszyhPPalyoLUfyiR  
S870U6EndDo1/jl0rk11yud23r3mCV4pFg2s1ZXoiznPbFGjJ4wNPfzpIX0N  
iQamdUQ/8YTvtp+seWrKkVXOz1N2A56g3hPgruZyFTFu+HntnfAEka5rU23b  
r6Dpadst4+xeIHW/03+m8hly+TU1c1vYCxSqJ3vIHl5EV9bS+1PkvIAe71n7  
4t8FtM4hVW+h7gVL6Rq1Ox3PI4JAc+EOfS+QP1blv/tjEWre6ZA4busFpOKp  
x8cdziFhuVISLdkLHDXH8xOXzqLegzK7LZ09YODUE4nPaaeREta6RTTXC5q3  
8+0b8ixAGWZOs+PFXjD9X4+LtVs+GrOf66+97gWBqqhig3wK6RGy610bvOA2  
Qf1i1kweOu8te87yiRc0KAzetdA+gZC2hNF33pBwrH5yNBLuaiGvqBft+gF  
s5Z5DaF3sxF3Ts7utE3eUGwi9bwwLAv5npbnshLwhm/8BwsbtTLRw5KOWVFp  
bxgvq/vxU+Aokr7m9uKrqjdkWlU+u7OWjpJvLdbXHfEG3kLhhcpVJhpqPn4u  
zdIb7uW2/07gZaJTPffjOw08wa2h810SOx3NvvEwmljzBk90h9fbldKQ2cdf  
u+szvUEgvEwxvCEFlU/mcdHPesOee38++Tgno00/lL5blXtDXraYwweuJERE  
efhiZ703fjCoF3r00gG1biY1TDzwhp/m839na+NRpEh+En3UG6bq9eb/q4hF  
z6X3UKznvOHq6ccup5pjkIryYwOxNW94ZD9yzvV9NMpUpyhM8vhA470jlcqu  
aPTl8F+uBjEfKOb/veRvHIXA+PR3urIP7Hxevi6dF4lKbFRfWuv4QPtK8knr  
LxHiiUYrmnT2gTpjY/WuW+HoduC/pAZvHzjkzKYdtTsc8UafpTCifODOh2Hn  
y2ZhyD9ln6EN0wf6fVN5pV1D0ePMZwri+T4wTmbeeRwdgmRPeXF/u+QDGQKX

/NMuB6PU4rXvDTU+sHZjvHdiJAhpVR+4Y9PrAyEv3h52TgpEBXd6isSHfSBq  
aemk4kgAmuvwSf425QOeh/cqIdMAZNG1QbnzxwceBO+vSm3zR5Uviw2ZnL4g  
4NbR9FzbH7ENayjaivhCYL7c14U2P0Qd7+OW200LX9tdH4aa+SHR5U2v7hj4  
glaVAVkm3hdFs5TcYdrjv0+wnpcW80UvuLSKbam+MH6yNE/koQ/au+1FskSY  
Lzj8ouwODPNBxyQCqVMpvkCuaSuh7/JBE7vZjBqP+4LOQpLKn0FvZLCvVDH9  
gi+wRw9cNjztjVb0X81JtPhCdNi1VfIOb2QXoMal+Ay3x3t1gG/YC107ISN3  
4J0v9Jtl7WW76oVWmyb0Dk/5gknit/fDoV7IcdTAzfvL2xdInSoIS90g+NS  
pC2XHxRK3uFuEfBCLGr/jrvv9INrFREPz054ourk+gchh/zAeEpPiHzBE7GW  
bx2JM/eDX1Rq7bMET+TWE7TEcPcDm5NN5Sc9PFHN4IOB4wF+4Pmqdz5MzxOx  
i8nvKUzwxg0hz8+ryHoioj7duOyYH+jQvBnNWzxRnf8I5UaxHxALnPdL/6Ah  
ctOZMx0tfiAlVfbi3RMAavi4UNP1zA+Wa8u1RutpijvD+tmrd35g/tvDRuYK  
DVFVq76MTPnBrQzRVzH5NNTkxL4+8dcPnq2qJzczaI/mSb6g8sfPvetPB2N  
pCHvq3fV/+30B78fTZlcPjQksBjtt1XXH3aHfxWStKlh352vGDst/GGKpd3r  
E9BQO6iVyHn4w+WZ//zJWjQk5J/TqBroD8KW/l6MvTQUcHLihXaiP3Dqlp/V  
lqOh+40GM/o5/nDrOGqIEaMhkY+l7Fbn/WHEXOSmqRANPdZrqktt9Qebl/Uc  
RzfTkKhTvVNgtz9UXPj6Z3iVikKTtoZFv/eHJ60mu8uWqKjzStCx1Gl/aN9z  
1+npAhWJdz+9mr3iDydn10xMZ6go8odcRwF3ANTMW1F2TFBRlyh9qEQsAI6V  
THce+kRF0X46fLW6AZDGN21GG6Ki7rwzim0WAWDyzlHA/Q0VyTQu6D/2CAAY  
L+Vyzgsq6mOrin2XGABvmwli6c+oSH4ve/6XnACoTuuZ1n5CRYmOtP++nw8A  
1z39AeKPqEjhys6xTW0BILKx/Qr1LhUIP4tZ4ekJgLqTUcnNrVT0auGlsMhw  
APSnecmrNINRGpZjrvIvAEpst/W411PR0MhKncPhQBj2FqjTvEFFamyufUTL  
QBi7fuXmVCUVZeypn/QlBEL63MCOMxVUdCAxSCIpKRCqbD0S75RRUc60kaNX  
2wLhvQwyLTtLRX/zJu969gQCs8m507eAivw5fv7eNRwI9lmjFuEnqcj4N5dv

2UoglFdmvzlwjlpYXmubXDwUBJZN4pS8ZCqKyTvNca4pCNajLvzx86SicfZL  
yOVpEGD8j9W2UKjIleVG7PbBINBvDiRdJIDR/uAHE6eXgmCXpqLfXScqKv3S  
K+XIEQxmP985GNhTER9hyEVIJBgsWY+pD1lT0bT5/JNTB4Phjf7eHBtTKnj/  
sLJuaxwMSsargppGeP100LS3OgdDe/AW7UP6VKR1WzDsuXcwLF1GDCqiogpF  
ycoT0cGAnh+Prz5MRcKXIEatMoLh3/uxculDVMQU0dzBeyYYztYq5bVrUdGP  
E5htz9VgiDrs0H5UE7fAbpmVUx8MqzTLphR1Knqe7HLP/FEwnONn5azcT0V6  
v2jLW14HQ7WKtwbbPiqqDgrZ1/U5GK5eonSeU6UisS/xflmLwfdZ5bM+rkPR  
MY+MSyasIfDi0HuN4D1U90flyUF2oRAYOHBQtk6FinzNL2x9vCsEPJQ+ndHB  
8dv710wzDoRAJ0fvNIYcG+nUpRnqh4DK0K2SrTiuu3W3idU+BPjL+y/Y4niX  
4rP5B9QQCFM1c2/H8anSN4qM8BBoWHva7oz7W98+RgF6CBIxrt0Ux+8TcmLm  
3MbJEDhWdE6YH7/vCNtyf8elEjiMMRraq0ZFFsmsW1jvhcDTe3VjcXh8LT/5  
QO9eCORvnNo+j8evFLQzfvV5CP5eP0EuwPNT+Fn+dtvHEEjjdL1Kw/PH7rH/  
W+JcCISOlFQ8fxGvzws07u023fmvZeuQ0WfzUzd/vKFgnW4k8+ALhXd1yZ3  
xamGQnqLUa6hvf3rQAWbb1Q2PVPsPC1ARvdVIjRWbIKBUvOPOE3xlTEW0oP  
v0MMhQA/y94NM3zeth+/Hh0cCp/K/5S7WFHR1PFzYxrJoUAdN658Z0tFbmxX  
RX/mhsJUCov6ZUcqOvizJTviv1Dg51DaJUykol7HmZe7WkNBRWT0hj+Vijwb  
JMRfdYXC4y0Xt614U1FeTNpN9Y1QuPa8kqM3llq+LRu9+ikTBuQQO6E/GVSU  
6hYrXr4vDjp3FWps5OD91Lp7YTCYE5l8lhmPhXpj3IvNxDCQDLmca5MKRWd  
X+0Xjy0Mg974G619Lfh8kDb5KFSEgZW3bNvWB1T05K56zUB9GLDvyKk076Ki  
n6lnQftlGDjwXJ3IGqSia/Sb6qvs4VB0z8F1EOc/lS1RrnchHDjf+ex21aEh  
y3qe501m4XB8Zm9bJc7PhV7lZSG24cB+o9fxrxkN7e180yVJDod1LwGhInca  
cj+qk5yaFA6uRBbPk4k0VH7wZdkAMxzayOM365k0tPA14LfaTjhEpJ1l786h  
oUyTC/yjReHw1+kd8ff5GqrjXC/DGsOhZwxZPGyhobWmwsfn7obDss+X0wYP



aMjMf9/0fGc49CeZL1Z00dBoF1Wj7HU4GH/5f0XvAA2pJPx1/fM+HOYUnh18  
8YGGYpULku0+4/7sf/d6jdMQb86jxyw/wmG7WLD05QUactUITrv9CYeHOz44  
6S7R0JXpX/y1G+FAbhurCPtHQ9/Pn9Dg4oyAW5o5/TosnkjHUsGNxh8BCfWz  
Z0+weaL0fx3JLdsjIN1P/K4Pvl+f/+d6WVAyAvLpylwtPJ5IjLjwOEA+AgLV  
VFAavyfy4T02/WBPBLwu2y9zWwDf3z3MG80aEVCoUrWJLOSJlnKSA28djoBz  
QjYyZts8EbKIVblmGAHS+rGrXjjO5AqfLrGMgMTSeJFK/PfPuwJunHaMgj9C  
1XMcgp5IJNsrMlcQAW8y/dgTcH9kU5IKwvv3/3nT8CK3J7rG4TodFxQBa3yv  
5gm4PNHcY7sboVER8P6HWudrPD6toxaBPkkRYBUbNrR7hYZSjYxUiOkRcDF9  
utp5kYaebkbTDrkRIMq6/MBtCt/nj7RvmJ+OAM73M+fkR2nIjXkgEC5EQNNP  
6Vs1r2moTH+PivbVCljSns6axfXFN5bd06r/RcDRE5evvG6mof33pW7I10eA  
zseSNPcqGopPEw0Ub4uAIUGNS1FF+H5HQipCjyKgrqCNsS0Thras80xv6YkA  
jke5lbq4vrC7y35j41UE7BFcPfwKSENFyRsBS+8jwP+LZ8cbYxpS/rc49WU6  
AhzuhE18x/VAZ0ts1fvFCDhz9NGnebfWxMmAl6uRIBkUoCs+juCr/68m+rg  
jgSFOM4Y6yIqKmh6XXVHKBK02NzMEoyhovexfQHvYpHwYIbl0wzOB4G/708V  
q0RCjpbYq8gNCqpraK06pR4JDf8m9u+roqCVqIaALN1IED71RLrThoJyFyun  
oi0i4ZF/zG25E2T0pvZyVZDD/+2XOXbujiOjiAsBnh6R8EoeDSi1kVD1fN6U  
bWak00KsmjRniOhXTXaVSWQknCgwDODPIalJocwAvcRIILqdG1bcT0QZqsnK  
msxIGLB9u5Y5SkC9szFTKjmRwMaSe+/AeQISrg6r2lUQCd/njQXUPAmIGBQQ  
IH0+EoqvnR5lHCKgchUv5a1XlkHov02SGrIE9H2KOMV+IxKoGZLNplIEpFXl  
UrVaGwn5LdFlj/cRUKq/XcDPlkiQu1GqredGQE8ULZSnH0TCb5M0kc+nClh/  
0nBq7FkkRJT3f2W8JSCXa3pVgy8jAZ5dPuAjT0SlPtoBz99Fwutmszw3SUSk  
Nq4y1TaF++cfjE/QI6HYq/JVdT8i4V2K9z4oJ6EOT6mAqr+RIN3XJ3WHl4xs  
Pwl0FXJFQaBU8IDPMBkVlFUnRCMgmMqX1vXEQWNUdgDMnZGgbVKJAfrRQoK

//jnW4RyFBRfbqBr7KYiq4KjBz7tj4KzUrWZ6hb4PjIRSrTTiYLogGENsWAq  
YlspfXgPiwLqB7X7xjgjf93cw7PPNAqOvr3mJVBORe20ZsdSmyjguYlc3uJ6  
q2i7cQmfSxRI3PvRP/8U31fPXo4nk6Lgs2/bljZc79mlkFVnvaMgc6NQp+AV  
Fe09MBNDCl4CzfG0cy96qWjL17i07qgoEA6PIL3swPVQERunbliU2K37PpzH  
9dl9q3zbKmYUPDmbMM3IppqISFqki0ZwoUNW6wDvjRUXxDtfgsvKjoFFIGvng  
emW/RGeEbxnuf6exAf9jCuJ9Ydf6tjIKWDx3Lrv6U9C39A+sxreiYOwwMbSZ  
h4I6tQMtGxqj4KPqnx7a8mobGbptFxFHBA7Bk3rPMgo+VL6SMFj3H7U13/G  
3GTk5iium7UvCizf8lh8fUBCmpwXQyLeREGS78F7x9NJSKBNUXFsOAqu3raS  
0bUnodnQxnXbL1GgcNQLKHivCXXJGprem46CwfDqhUoBEiof6D+pthgF5rPv  
qqjWiYieQxy6+DcKgksLLigvEBERTcnwbYqGfWo53ZKzRKSzGBOQvCUamAbR  
h8vx78LXWotmtkaDC5Ptp8A6ES24n1zx2BENxWfmfjcJk1Avn4Rht1Q0HJaZ  
MPuuSULXH1zPPaQQDaq9pQtsFBLKiDn45rpqNJCw3h80p0mIqvxQQvRgNLTJ  
yNrveUVCRz7Y+GQdiQbtHU7bPouTkWj+8M0lw2joHB3i6wknoxd/fqG3DtFg  
bJzqFLWLgqqrGVlGHrj/wG7jk5EUIE3lf1FPi4Z7PneD7dsoyFv4gqhcQDTY  
VJzzFPpLQdClSCsIj4aQbiv/s8JUJHcULUpPhrW+jfdTpDH9d4+/cXwtGiQ  
3clD+ozrszdf+nTHMqMhfz/z6KgSFd0+55FumxcN6ZIDtqVyVHTccrKn42w0  
cHpTgkfEcX2+ESWsdjEaMEu5BlkhXA/Ws5AulkeDg5giywoH/j7x01HBWx0N  
T/aPOQz8ppqBVMbG5pHo8Pzs5hdZHKGjo+TWtmVbcf3LffHInBZ3Suv/02bNo  
CN/OwX2nkIKCp60EDr2MhqjT4Q9LGBRkVvr07fpQNAQuvvpwKpSC5B18L+8Y  
i4bU6VJhIFMQC8fPqczJaBjQMjF2t6egkZY09aW5aLiQqduYY0ZBzSG8ST5L  
0bB8/nt+uhEFndIV/OjNWjQkBkrUPDGmoLC3u3mN2GNA/+9/6gXmFOR2IOfL  
Cd4Y6PvrYOMa8y2cmGsd3BYDo9w701scKUhyqFgl3gMnDptkxPkTkECxk0B  
QbIx8GfFMJebQkF/ysT17yjHgOp184ZD3jh/rKaJbuyPAVPW24sX8Hnpchuf

N90JAXL4U403QRR0u8HsaQEWA+Hivzc24fEVCdwsHTGJgTd/F2/cDKMgerBg  
rIJNDFw77nv7QTgF+XfFWIc7x8Adz8e9ChEUZC//Xr6VGA0vul+2P8a/69LR  
6mbvGOjdJn4kCz8v03LltXVQDETxrnE6hVAQtw7nf+ciY+BcetmIcCAFLZ40  
Yn5KiIHJwdSCPh8Kej/f776HEQMwf/ou76FR0ENLzQMx2TFA3fEzOohIQtcq  
i7bc04njwcGx/1wp6PTmtdEt52KA8d6nlQfPTzKF1uRQGgOrDzMHqvD8ebc9  
ziupiAEuDXnuCgsKstqh4jtRjeezV1FFwpSCNKPy9PY3xMBa8N40Vbw+Ev2L  
woltMRCxIfPtuj4Fse1xnX30MAZ2zfAJuGMUNJvZ9oivOwYuXg3lQ3oU9Paz  
9AXXlzEQX9LR5HqYgjpQRuTloRgwNk+YqDhEQdfOfzOfGY2Bs5JiEUo6FJS3  
ZLXr4GQM/DsusW9Ui4JiHWr/pM7FwBae1eVnBymIXLP9RdfvGKg+woge06Qg  
E+7ESqG1GHDI8+DYjGM134+pRLZY6JhWGVXQoKAdDw1crvHEQjXZ3MBQHe9H  
qUrVBaFYGF7ijbI9gPNjAg+7rlgscN7vbTDYT0Ev3oanpO+Khe9PRi2E9+H9  
eeBNfZ9SLFiKXoxvU6WgshM6uTv2x8Jjk57Z/XvxeZ8q8aRpx4Jx90GzeSp4  
f172EfxTHAv3dFaLIRUp6K/AcqiEVywcmLwt9U2agj4HE0x8A2PhxB3rDyxS  
FNTddU/ydkQs7Pd23C0oQUHn6dm9hvRYsCIrfZYSpSDmyOzVE1mxCHH+jLqS  
CAUF6tgnDebFAs+pkiBtYbyfFnaqBF2MBfG7Y/rhAng/WaVuulMeC8rKtpql  
/Hg/Xf88tP4fht+rveU9LwUNU/7LKmiNhU0sy4rZXHg/9B/52jIYC979L1iv  
b6Ygmi6r25XRWDh2OWZMjhXPb8XT7pzJWPgLDQ/KWShIMMnhNmE5FqYS77y8  
vUZG1xT8k9ZE4iDHuCLv5TIZ5earzn2VioN/zRlzzktkFL66SH2uEAe7UO/f  
gV9kpPsqxeSSVhyEnbws2fODjPpTTgvqu8TBkZ6nfJQZMmr45pahTI6D7GNX  
9lRPkdF5R6llQd84o09TSpmdJCNv5aqRzzFxENp2RttgnIzMz4Ta9qTEQY+W  
YITzZzJS29B4WH80DsiHZKJcx8joz5uOyoyzcfBjXSZSboSMPmAZYiEX44Dg  
eh2beUdGD2+Yn3CuwM/TvsdeHCSjE/Q3kQp34uBE0/Cj9ldkJLt3Wq/rTRw4  
F8RhXU/JiPPcrdu3R+Lg2jWxR52dZDS7KUaueDwOLj18uXjlARk1DW5sCfyF

Zz9SubzRSkYlBo+THFbjIGsf4WJyExkxb+bM6bLFwx5nm1MD9WRklb79DY9w  
PNR5Sm5IVpPRgbn3Jr/E42FtNM+S6zoZibiXtYzIxUNBa2Bm31Uy+qS259JN  
jXgIrvuP3KejGLfQ6CtYzyUDFWa/M4kl4IxxwdtQjwsBp0PPcYgl7jdYyv  
FQ9addZPvyEUEU+my8EfkfEQk5NvKYvvs4UF8evvEuMhJ+jt8+kAMhogfBJ7  
yIwHtV6lR3FeuD44EMxyuiAeBlpUt71zJqOjJQeiks7Hw23J5fgbNmQUyLn8  
1etKPHTVbHjpmPKR5gdGj2ZdPHhzrH84qU1Gz7LPFQ68jAdBy7W5SWEyMvg2  
n6/9Lh6+OkpbK+L6rt3U7ETRWDzklQaEyW0moxqOv+ke8/HwmsB1wHqBhAoy  
PCI+8ibAPsXYVaOnJMqzXheMCSfAvfn3/Wbt+D435PEvE08AtnvHuzZu43qS  
tZ3sqZIA4m8CPjJFJORBl7SaME2A3GPcTs2+JPR6NMbU1DYB+nSGKjTcScgK  
e25w3SUBrtbvSHWzJCG0nnoo0CcB4kNTF4vVSEg2eUxhjpkAQ1Uz6D2uPy4M  
68ja5iQak7vFL20M1yOH8yVv5ydA91WLE439RMSxoi8cWZYAij+ULz2qJLp  
uKublu4mQByf4Kw4jYi8Bv+tujxOgE+lyrBoRUQjWk5/mnoTgKze42ikQ0TP  
f7PNJwwngMDvt2yOfERUF+U7svYnAe5u6Jd8uE1Ae153DJJZEK1+f2KUxGu  
59V3vL7HmQhVF51vaaURUOGPp88YIolglTKZ78lASWGKTexayZC/AdNofvD  
Hujnc0ad7+FEaBbeoWbd4YGC1d7ffGqQCBtXNbU0yJwQ+Xt0+TH7RBCn2rhs  
8vRABkGz+XxhibDqrTnu/8EdtXUbnQiNTYTBSOVweqs70lS5mN2fkgh1m+tT  
RwvdkcKUdVr+8UT4Yng7NMjaHXH73QrefiMRwqknWx1q3RD9rf/m7XWJsGio  
+TQ3ww0tGcqef25NBHVq0bkiFzf0Webs023diSC1b7p2+7Iran2fKCs0nQhz  
F54KLCu5ov3mmi2Ci4lQ35qQprjogq41fbcVXEmEwmkm/2qLCyo4Q00R4E6C  
bwETbQnGLijQxmSIXyUJ+IjsRTKWzmisfSOUXz0JRBPSrXu2OCOXPS3s/LpJ  
cDVtIW260wkZbNmrwWeRBL4HvxwL1XFCYg8F83gCk+B3M4qd4HFEP/b3yPNE  
JoHVOVPXvHYHxHEpo407MqnStQcFk4Ic0GLS8jeunCR4UDWgz9Npj7oPffDc  
ciMJ+rsDXllodgJKC99z1iVBnGr7w6xNdqhRyC6CszUJpKy0zVOMbNFeBtcW

zodJYJfmYIFRaoOuzD8s5ehOgpl/sst58jZlIjx8kONVEkQkbyfd+WiN8noP  
9rK/TwLPtmvHTr+1RmyH5z3ZPycBRNnmlAvaMSq63/ZppPgBDk72OuCDVrY  
4XmKbTEJnml361km2SLfTHFFtpUkaBt5cnSGaldGfr25u5k1GXzIVcuWVeyR  
g1ee02buZMgKjW6u4HZAXS9NZ1iFkmHu1LnsuEUHhGATk1UsGa6tvGjp++CI  
VCSjb21SSYYj1PDxY9XOqCxx1WSTejKo61rur810QSIrEyMsuslwfYcCc9Te  
FR33L4tiMUiG//wOp8dwuSHWQXduFotk+LmgOiRy0w3FG2+7vGGfDNB1fkHO  
yB3N1fdqb7gnw1v5W143+9yRt2zm83VaMvBniR52MfNA709hPusByWAWIkF/  
UOeB7Db+/FuLSIYxUpleAQ/+fg2pK1hLw0/zemdykD0BHRkJUl5jJMNf21Lj  
BSYB1Vnsvr96LBmGw0UUOksJSKnlo8tqfjIcVTlcz/iPgEoVi77/K06G8Ic3  
lRjr8fd2oX3Gv8vjwBspdfNcHQHlsvGI/6tKhmeRen6d+Lzyi5fA29pkEjrY  
abF8k4BOHVD1vdWSDAruos9XcXtCZh25xx4kQ1jrsfryagl6Q7at9XqWDM5/  
Olo7cPsiMWMDei+ToYLnMf9qOwEV5Uas7niXD0JLBpv09hCQ2BVW2cWxZCjk  
sGp6OUxAJc2nTXu/4f6k/uSNfycgqX75kGsLyZAtSZnY2EREZV/vFND/JMOv  
r0XiLqJEJltq0uzBkgJ2bneP7zxARBVCQx80t6RAsfP4uWScn5SUAzZvFUiB  
v+evNiYGEtENbEVpakcK6KlPmD/KJqKaYInoi4opMJwdNa/3klj2p98sjtuX  
AtYd6XOWIzh/FaN79topUFBqtt77k4g0b/eP78FS4M64/PZ9W0io6QmVm8M0  
BR5bjimPiZKQ7ocf+8ZsUkCk6v3m9t0k1P6T6dzqgtTK+M9vR/nZ27hpDPk  
FDhit8/hySESui9TURbqmwJHITn2RuuTkIG21hOz0BTofnPIR6spCXVaP52R  
jU2BG8HpK81WJGTi7Sa4lpICz3gUSo/bkdCzxCmtwaMp8KR3i6aTI74P8hOJ  
tSdSoFF223YDZxj6XsnDzD2bAh4zYn21LiRk11FS6XMxBXZv5T8y4EpCr96o  
9mEVKZD6r+jhqBsJ0c10L068mQJ9kv4P1vH9MrDJTvRXQwokfVES9iKQkJvo  
J73n7Skw15JxA5FlaFgt0ut6Zwrk8+9xuY+/T8nGm48xe1PAK9pkT6MnCY0R  
ztQQ3+D+Niejr/qQ0Hh241+B8RQQ17q4rh9EQr6XTKVnZILgz0AX9UsICX27

M2T0+GcKHOjtP0cIJ6HA3oDAS/9SQMK4tuFKJAl9/7xyMmFzKkzwdnTfjiah  
8L+5dxx5UmEtxXV7RiwJLW6VHFbdlgpemat3xeNJKFqhhmWLeCocmw+iRyaQ  
0NIRTOGzbCoMM71F0xNJKN7xhWW7Sip0cVXomyWR0EoALaJQPRU6rGeb2nGc  
TF8sDNdNhb2if7WGcbxRmN5uYZAKc1Kjhy7hmHlT+L08RSrUGUWlK+CYrbOC  
c8M+9f//T96cjdVpFK+l+s49FUSU19e6cf9bfjx1qKelwgtKeMMSfr8cTv4  
EwGp8LtDOFAIx7xS0xf9iLhDGsVbXccCQla8k6JM1lhO1d00zqGhMQq7NIy  
yllh8rXEvrQIEtp/O1p1sDIVvIddqcV4vkzaioaVb6XCoz0NEY1hJBT5cky7  
/24q+BsRYlhCSah7LXxh53Aq7GRleB8NxOuz5Wxp8OdUMP/F+7A4AM/Pthar  
e10pMCN4TfG6P64fVDZVef9JhUsZct61uP5IdMmn3dqeBh+MTmaG4PU9Rbuz  
IVUyDQTNs9KtaCR0LfdXsF5NCjb6lK1m4r3F3OX2lp6GjwoEsl4gveLyq3a  
V0Z2aXDIRCvPI7zfhjlfGb7PSYMBocoYARu8fkJLP/YWpIHq6n+k//f7Fimx  
srTiNBi01m+g4fpGU9NzVf56GrgqvNpNSOh49TFhrDHafDt44eoGEMSKiVy  
nWzloUMS357sXfh8KXuKT/+3mQ7beLf9mtQmoQY/VX1nTjrUh9cl12rh+Yi0  
n6/kp0NNp4apiSYJOcd7mdgL0YE4drWVTwPPT0rMxZXtdGhsnbz54gCen+xi  
S2tjOgixccbp7yMhRt5/V5Zk6OB7KTx1RhWv35m7fy/J04HLodv/2F48f5c+  
VS7uocO4c6B5sTIJ3Sz/uX5hHx1CXqMITiUS0rnB7mKsQYep+9KjNAUSrmj  
zFakSweakdzCa1183gxmr59CdPia0jLRLkNctP4a62MGdDjmXJJ+VAqfD2LE  
IsOEDow5Bfc9Eni/T2mcS7Sgw6bghr//7SSh1Nilw1E2dMB+XFpm20FCWZtb  
xoIc6BBx2eirhJAjnZdEKiQP/PxWhXdc/CRUfoOl35lMh2fbdRjVc+P31X4U  
ZeNjh3f9B/zFOHG+sje7iwXSYdcq7HbYIKLuj9yeOqF0eFj3/YrIPyJ6HdTH  
cSCSDiw1e69eXCKiiaMOdrKjDjDe6luemiWiBaHtv8VS6RB4YSKwapKI/l4a  
LN7GpIMC1/pe2c9ExNtK/MKWQ4e2r2fjmgNEJGIqnb12Ard3oXexC9en0m8+  
7V3Kx+OvCS3hfUZE6n0+sZPFdDiYQks410pER5KUxccu4vdJ9X/5ro6lJLfm

3hu6TAf/INPsBzelyE02gqu7ig49BX8JccVElOqSVFLdQoe7PxUu6kQSUFYX  
Pf2Ku/h3xa/faX5ElB/OMnHxAR0uUJ32SxKJqDzn6L6Tz+hgHIL3GjPC4+84  
+TDiHR1u9XoX/uAnojeWDn6BH+iQxn111peFiD4MCfN6faKDxsbiePAPAprw  
GbxN+EqHoXDlH3mfCWwhsdjZaYoOL3P934m/IaCVNOKK1Xc6dL6UHLB/QkCb  
+aQvGf+gg2tno3RYCwHxnv9kiH7TQelr2Vwtvo9FFMu/af2lw+Ad8yS3qwQk  
0+B7Yt8a3n/NUutl5wlIwV9ZXWkTA7xDtTx6dpqA1J/PDMiwM+Co6+YugZO4  
fiDUJ03kYsDWP9/TGo4TkMm3cBkhPgZUvmjd+hPHtjEaj7kFGTDrOXiL+xQB  
ubEuBWzezgDm/tqiQ4UE5HmymX9VIAG8bXdYOy4RULBEUv0vCQaoue78IILr  
gZgqPbfvMgzlPd+l6tJKKlLaLGtf5RngdjmmxLSbgLifPbz8UYkBRtSmDjTh  
+7/A7qjJ4F4GLJ8bXQqfw/XAB9OZ/v0MkBhU/AWsRHRruVfzgQ4DPOXaWh33  
EhHrxpBk7BEGcLpnCDYBEblwfOXYAww4ON7X5OFMRKvCa0NnTBmgoT8/25JK  
RHYSXA/NLRmwq7Hvj8xpIroqt/2/dRsG1D05ZCNdSUQW6qop/i4MOFLi6k3u  
I6LSQ4d8JT0YIL5tT+WZUSL6Aca2r0gMODfnf04n/p4yMrPXyaIxwH2e9aD+  
JhIqsiXtOuLDAO6BC3RDARKadQng/uHPAD0vnMT7kiSEkWN+VgQz416rjlwq  
zgcFPowRj3A83qitSQY430wEn3i8NZoBDfEjzNe6uJ6ILq7pjGNAnsLYoWWM  
hE4kVZxLSGKAirp50coA5ydmLV0tjQEKdItWfhxr5twN+MJkwN6buzLyED7v  
+c8cijIZMHq0ZKMZ57/3RW8PW+cw4Eu3vKoTzldqZZ/kWfMYcFtdOcxQGuez  
yu98TfkMeJyaPd6A88Gbm9LQWcZE0hyNNhgFddTjexjMsV4fjfyF7S/4e+9  
Tsm6nDL8vu+vFuS0E5HEZ2sX8i3cn7PyU3EKEYVPuWPb6hmQ7ijfrGVGRI8W  
fjS6GvF62j5YEFXH5/tPhGBKKwOwwEgPfkkiCtxIWTnQwYAUlxsFpbmlqIMj  
58vEAwbEfn/v67lMQIL8hb0XHjPgaVHsiNskAXlvv3LH7hkD3nUrftF8R0DN  
EjWl7HOM0ByeoAT24vMi35rV+oKBz9t5JekHBETZ8yQ87A0D3gZtDk9rwwWy  
+it3+SEGaFV/9m+6RUAcuh8N3g3j/ST01/hnFQG560/vyRtlACGFU5dyjYCq

zZaEDb8wQO/58zjFCgJisWNdX55gwN3xrerx+HdHV/7J6mkGTJblXki5QUDX  
yGIvaHMM6P7MOumF6+EVH4UWkUU8nhwtU9c2ArIOUb/S85sBv+Mm59K7CKgs  
GuXS/+LzkTsglILH8yvJlvrgGgNqyztHD+F62DTdhTTNwgSZvU1t70xENJcf  
us9pCxMYko1+/FpEZFCcKMrFy4SCXnB/hOvfs2WZmzq2MkGJulfXCn+/f6ss  
ml7cxgT6t80353G+03Kr9LXiDiYMxajTftGj6FTjjfYRMSZ4ib5eLMshoi93  
GyvypZjgPjbGfeQkEWk9fphnIsuEg3neXIs4zul9HvdvNxOU2W5kseCYSMit  
2VBmwiPpBBfv40SkNm36dbMaE+LCGW+CcL3NksAmsUWdCVvRw1ivdCJ6xfnA  
gVeLca4vdOvOpeD8WphyTECXCWjh0/+c4ogodrfufWHEBN+ve/ZNhhORmGG9  
qqQJEwRPj1428Cai2Zdh3rsmPCWg/V4KhvF+reC7ttmKCQ9y02zB2PZ/7b  
S2UHJuhMPeB2wfnAM7Vii5oLE9BQ+3ykA67n+TwxdQ8mhIpvec5hT0QcJVKx  
WmTcvn5tuSSOh1SGq3U9mTCx7IDXhu0qlnNfkC8TvhQZU0rx84lmTmKGgUzY  
7pFz77ojEVkNctibhjlh54Ts5F0nIpLy7cuyjGSCTerW6fu4/4VfxzpsY3F/  
cQ4jZ1yI6GG6yW/HRCYsP5p9KeFKRGeENu91S2VC81bTg/Y49r18z5PIZMKd  
/vESYxZR7E8upmbi9YIVhxX8PPc9nRfeOUx4uHm/dBiOR6x/cwTkMeF13IdD  
5bi/mpFavZACJpx9pXuqGL8PPSg00qKQCVzCZrK2+H0dVIT+iznPBLUj7Aud  
eHzyxyY/JZQy4VTsyT077Iio6xrVlnmNCboe8T3/76fzByUzM28w4YZ2jK+U  
JREFd75rz6lhWgBR9mOSOREjFHZQOd3IBO/UE16YCRG5ShqzLz9hQv6JmS+b  
cX5Wqt505Ho3Hm/3nz85ilhWdDsiq58zYbPUuf3iejfummPNQwwgYc9i9NV  
F9cPp5XbHk8wYVumWa7KQsJqlp348WyaCSTvyI7vGnj/1V5Rej7HhB/SqtCE  
84lav3jhwBITFiQ4B8n78X4jD/W+X2GCm/PGPb19eL/Nntk8uo77c9e9JK+G  
9xc3f8QkRzpI3Fb5xoPvE7Pi7soZ7nTIXmnezbcH7zelrI/z/Omwb/3wJLEV  
vL+MWaz+iKSDmvSrQ1ZKeH+9aWeuiqVDukZHYKwi3I9eCS0s0unAN2/36T8F  
ImJnLCpwKaZDh7mEqe5ulvr4RaxiRSUdbs53/iyUJ6JGE005WbV0SJuiC7Pg



OK8q6PIH9XSYdcvji5XD6897RrpfKx2qKXsM/8oSEQprv3hfNx3ipAt35uBY  
5NW4eB1KB18PjftyOH5y7qDoWZN0uCd+xsdIF57PFVJhpkU6PGDyR36XweMl  
ZQrH26SDGJXrPgPHCnKDAgSXdfB9ExJRKk1E60c38qw80mG7iM2aPI4Hviny  
IXI61MiXiFdIEVFmTTzXLt90cFwPpebhfE0WvJwlFJgOudGBt35L4PwQ/Yyd  
LTQdXvA9+OSAY/7BH+m/I9KhRbqGp0lcr+chMdbJmHT4sBGsPyOG57PEgD6U  
kA4vNx86J4/jwo3A9Wcp+H0Y1rvsdhKRyeO2leqj6RCP9OQsd+DzpDQeX3os  
Hc4on3wUK0JESzm8yydPpI0mY9wjz+1EdM209DPybDpUtRx/y7cN13f1RyO8  
i/H8i+yY6RHE9YFIzbzzxXSoTBgtThDA531kfUanlh3a+b/GXObD64MUA1Wq  
0qH3UlqyGC9en8u238Rv4v5/CfXTuff6+JWNrzekg/+1j9zbOPF6dHd5LjSn  
wynP6D49nI9FVH+MfWpPB/Gyu3mOm/F6LOp/60xMBxnS7vt6GwRU6hxlaoXK  
h5TDI7kE1wgotrngXWVvOrC757L1rRCQQuqXtzlv0sF9q8+D1d8ElMl19Lnd  
eDqUpNx08JkhIHLwTSuDb+kQmVHEXfWNGLT633ZrzKbDQILzy8mvuL48o/BU  
5Fc6yIW7bHiM4XpOpuveyOYMeG/+nUv7LQFavPU+stlwJsqTb179whlSTgl  
SkQxA3bWawR73yUgix9zBztVMsC4p/GZML6f8v571SqtngFai2MvLzUS001s  
o5S+gxngVxhun9JAQK98GrGkQxmW/amqUXAdrkdIzncOQAZM2Xd+ZdYQkM4a  
T1aGUQYIhk4+rsb1oMf7FHN1swxoPt+TNIvVx+SmeZ4xywz41LxdxhDft6Vn  
aM9P2GZATIVgT20lAd2PeH3qsGMGNFqHFR7C9+tnG2PHKZcM8M3sKh4uJyC2  
vU3bz3lkQLGm+FwRrn8V/kexlYdD4XVhlEgi2UqRkEpCCJWuk4SkkmU2+5qE  
CkklLZgxM2bMYkuKJGsoya5EZY8kEUklJAmVpZ/03e/P95mZe899z3vOec/z  
sHxrij5lLFBzbjX4vKMMRWQ6npEy7R0HcWRg/cdsR+dWLO6d7R4Fds1PD5XRH  
FjseseHliShIW7OM8Aj718JLkx//84+CkH0f76/AulPikZl7OgpebeJPrt5y  
RNOGXT7EEBx/Vu32DRjLyJpvFQ6Lgm13Ja4O3MT5mC77VnwxQcr7w/bXY0xq  
31rodjkKcqipP9oxvnDvxmmJyCjYE3nVdhn+fSp9pV41NQo2nWlb64vxY5/L

v08womDNj00/ZzAe3D9VJs+Oguc3dGJLcDxCGz0vPOdGwQdZPi8Dx6+22GUc  
nBAFcgvTD+vw+w70mf9Tvh4F67//vimH+fApL3/6MjUKMmj7FtMwXzEJGIHh  
6VHg6HfxmhvmMy8o1VwjMwrm9A72kHMcUetRieU92fg9kTYFLJyfCc0rLdH5  
UZA5Y1D0F+dvldg0S68I37c9g5mP/ZLuiKfNx+Io0H1u0JmM82//7M3quNlo  
yHW+yWh4hPV92+KNcWUUaCWEie7C+0tyREXSWE0UnBE7Jf+j2hFVom6jJD/F  
73dS9/5W64j6jW6uN38eBf9tMUvTfu6IFmUIP/xsxPdLBgbXNOH95ueV27db  
o6Cz8GBc4kvs/wq81P++joJI7j37HdgvURndo3lvo+DE6svkmQFHIHPcMp/U  
FwUpL647rcT1Mb5RU6fkUxTc3Y9kjKYdkcS/m9Puw1h/B6XVjs47Ip1+yUeS  
Y1G4378YfYz3t5DEn7t0TmH+v7lZFOF+kRjsvbDmdxSc9uAZ6+H+VG7z9vGL  
uSj4KbjrphzuvwtiVftVBKLB3CCcKITnVeTla4d7JaKB3j5bklr9sNpQpnP3  
6mjwrL9ec8jfCT2zbAh4LRcNeT9ejV0474SWrhZntylFQ3mJYEdoAvZDoVq3  
mlWioUm8fISSiffZPpvCBvVoSPfytRh8iPtxZsLLp1rRUPVOjjXUhfV58vKB  
x7rRwOs3swocdkINAe8mqgyigXS39W/hnBMSNdwgWYqiodn24lwf9vuMppyj  
eUei4UxcwprXqDPS0GpxzbaNhurdOuqI7YxaeN9PZRKiWwrPUMF8ljMSd9Ll  
3HKJBUmlc17b+5zRvVr79Bse0bCzkHby/owzOrzp3P1kn2hIOcsj3ibtgtgT  
VR28wGgoVQ4w2HDUBWnZDQzGBUWDwOjpxoxAF9RejjAVGxoNH3mHxftjXNCq  
qwekaBHR4E+ZOPTw2gVxpduPXWRHwweVq8yxE65IN2zKPYwXDY/DxtyCea6o  
s1866GxiNATDuOnOale0OovE03UrGo6Fxn6vXu6GisUuZvhnRAP53a6SSGU3  
ZHfqZvGJrGgYo3j2TBm6oXijT52ehdGwJYgyqt3XDenfXPrZrTgabkFt3P5r  
buiN40afzqXRoDv+ar9fqhsK9Tm4xLES85F6sbq31A3JtZyUJj2OhvDhVDK5  
3Q2VarNVHeqiQbXgrj59yA0R4+/r2b7A/BwW+Kz12w3NzXXuP9ocDbdV5f9I  
CrijZOftdtYvo4HCspecXuKOjOrkvQ52RgNxRKU85Z8b6lXfHWLeHQ0x7HF6  
+5QbusB0itr/DvPxYZ0CodcNKUxGxMNANDgZrVv8WeKGGKu1vZ+79FA1ifQeX

voHyQ44V9SW7h60heFKvrf2wG0q9JvpGfyIass4ZUMqzXJHxiMaXHdPRUFnz  
TcNJ3RW9P3T4t9ZMNAjvXXA+n+WClu6fEtb8Ew1Gns/NXDVckJIsT3brYjQI  
3srUcX7kjB6fL9mkLkSF15TzoDorZ+Qy0L1TdRkVtEXWOQ98x37CdP6AshgV  
lD6xkyrTnFBa9jqCogQVTiZkzaVTsH+j0vK6paggvVRZwAjXT4j3z8U4WSp0  
/pLlIcP16WLmandwLRU2F6iNFjTjfq7aki2kSIW7QauLA3E/0hUyXKhSpkIf  
g/5fU5IjUvyYYXNWjQqUPXsqdFiOSLRW4q7WFipUNvV8kMZ4+taF+ZFtVli5  
K001hL/ff2n48G1tKswInXwtiefVCyfbDioeFYINvly3a8Pzbs/jGWlDKows  
m80wxvHcUNA41LabCtMhNd2x2K9Q5xPSqAi/76qD4jIzvO/2CP4yMcWfb+t3  
8cP1TskLsJw/QAWJ0MDIi1wnZjbyM1p8kArCbluD/7uP/erZA1MnD1MhYGyr  
3L1GJ7TW/sGBTcfwe2RZ9ke7cT/QU0wZsMf40ym57Ld4350iTySRqPAh41yu  
XgveTyZ/mR5zokJW7pj+3VK8T7S7JYm5UcHHQDDicKoTulFY+q3ekwPd1T7X  
/4Q7oSSWEVw6ToWk+y9uXMD70TX/zHiDk/j+6NbrN7B/9j+06uuPQJyPItWc  
bXj/huWjXI9QKlxuD7Z8hfdXjVG74XUXqjBfUL8kMtoRyTY82f3mEhVci1ar  
9JPxPpy1LY59lQo/UuYjMrUd0VhU0meLaJw/xd/Ln4k4oi7PJUaCdCqcbup9  
7/KZgp6YnoqtjKWC7o/NNjfqKShvY99gMIcKQ+9dS9NyKShewGLn9ngq/Dck  
6MNLpKCID8X04SQq9NuxS64zKcj3sdJA2g2cv/PRs310CrK9ydAlp1HhwuZI  
tVguBe0Nn6GuvkOF0agtU/OpFLTF0aOvJYsKX3vDdVzyKGj17pfa0XlU6j2t  
l/xdTkELa3ZHoUIqKN7fV/2ngYKGZ+/2zD6ggmzXLS/8bgrq6Jba/uARFVR2  
Tu7YP0RBVY8uXfWroEJuZo7D4g8Kyor/+ka1hgqHrhLdNOcpiBPsoPG+lgn  
mc+1uwXw/Ld9GpH4jAphb5/yfDEfXju2vz7aiPWsveXHA3FHdGTV9c3LW6lw  
xKUr78oqR7Trx9LwunYqPNuese3OajzvX57uuPiaCmTfgLcjGesu9KvtfEsF  
5x4pGUUpRzTHtDw/8Q7zd6DVTWol9kt+JW3ZA1R4dlvekYDvaz2orOL+CZ//  
46XwQ0FHVLYlNlRhmArmZ+mzWf9RUIbIXPPrr1TQD8xKLfpNQbHDnhtY36nw

QF56XGySgkKftwebT1HBrqi6f2aMgtwy9zT++0WF+0Ec7wfDFGQVmb2+Yo4K  
bmkXL4Xh/070kd4TtECF5w9el+h/pCB12W/iawVoUJA3Q3f4QEFyjXU5T5bQ  
IOgu26bpPQUtu5hi5iNCA9mMG6Kcfgqa2R40KL6CBvHpisW5fTgfgwfdH0rQ  
YCpd5rAcxm/5G9dQVtNA486V3jfvKKjRfP6hgBwN9mW7E0cxLp/vOJq9lgb  
Lj6qPYy/n3Mv59thRRoc95L73ITxddcrtF/KNAiXnFbdh09jrCap3lCjASnc  
MtIV4wvPtZ/s20KDv3lrBc9j7Bcm4ji6jQZ+N7xvnsHYcduHGby2DdiOa5IO  
Ymw9UMrbqUeD1KcB0wQwNuaytfoNaOA+u3VrIr5P08yn+dpuGnhLhGSvwFhx  
dq/PVqQD00P/Gj8cr0SerFDHPhqkzKD6sl4KWnT6fjP0AA2MrMfLp3soaELy  
+S7FgzTQNgq5tQ7jD3Wpb+qtaXCpsjtY9y0F1W6xXillT4ON17ZNbH1DQff7  
VHPLiDQ416DIF+uioNvs/8xcHGnAV5bW6u2koGu/8sLzPWhwRXXWwKyDgsxq  
l48fOIP53f3W40ozBekHf6SNh9DA5rWa3nwjBW1Sr1Dlh9EgZ++eCH9cH8ti  
fR0HL9Og07Lf90AzzD+xofkCmwbzpVnlYo8x/2JpPht5NFha08mlVINQbk2o  
UGMCjo9n6CFWhflWVd8te5MG6qw3d3Vw/V3o/vumKp0GnQ93hXWXYr7pb854  
ZNJgQ1rJP8YjCjr0Iyq3KJ8Gm5+Ijqs/xPxmOB0gFNEgd2qiSKoY8+ug/3Gh  
mAbEieERqQcUtF5U/NKdUhrIyXXB1vsUJF71eY1VJQ2ahAf9yUW43gOqSiZr  
aGCre18hs5CCvivzbZKe0mCVr4KSKMYDr/3G9z7H/C2enLtUQEEvqaYxQ400  
WEtL+iiM8eNdCmrMVhp8ylqan36PgorGp57s6KDBE6F16kcxTk9rcux5TYOb  
JqZqqzHm2N6ejXiL9Sf0KXQsn4LOlNtotw7QIKRgq+sAxrZKAsfXDtPAapu2  
3w78/aekGBvJMRpEcev4MRjr8FftFp6ggX2X18NFjNPaklX/m6LBYd+grngc  
j4ToxpVTv2kgUGchZI3jv2SaOzM8T4N/DvssN+H3jofvGOz/S4P3yVUPNmI+  
HMsqmjoFY0Dz32orU8xX89S+h43CMXDp7531MZjPXZrNqY+Xx4Cnalv+L8x3  
jo8ttWRlDjyOH7pjw/mQv/3uVJ5UDBJIHfbcX0ZB1D4PcrpsDFgKuXO2VFDQ  
b9lvpolrY8CwLVzHCOfbyyZYM1YxBhK+LRwJrqGgfc8j/53bFAP/SnX3nqrD

ev234mvA1hhQzP34c91zClLaHd/puT0GDuScqX6L9bZQmHn36M4YqI544nuu  
Desr+fmhzQdiwNjzfYgerhcdf5Hkbbq8YeFAXxr0yhfnJirva6hsDN/eft47+  
hfn5KH+yzj8GkhOii6JmMR8OW1BhSAxUOFvbBf7FfHDub84MiwFXzdZlBNyv  
m5uNpFLCY0D20icLvSV4nzA5OBQdFQMFDs6kJlFHJH/hVdvFmBiQMqClXF6B  
948SctmZ2Bgl6yjdqSLhiH5PfEw/zomBsZYXabdxP/fa6sdwjo+BDWa00n9w  
/37tOR1slxwDn0TP9myRdUSmty44H0yNgcWvMobb5B3Rgx4hC5P0GDAP23Nu  
cQ3ef6SZOjszYyAlxgbTFBxR3GFphW05MeDhsLFafD3el2g3lmy8FwPvnn+0  
MvV0RAF1qt/l7sdAtrvmyF4l7HcW8rvFS2IgfK6wYQHjQ4b6tULIMRBA8TQK  
34D3sTPVuXNVMfCxcCyyAuOt98z4E09iYpXj1h8PME4ebg0fqo+Bs67dzz0w  
Ftno4POuIQZ+iZ063ITPC3V8f7SjJqBlnKSN/D9XxK8d71oj4EzT2y493B8  
9h3fVapfx4CI7433quscUb1YqHjx2xgYIYf9d2At9nMHFn9n98XAe69R3VX4  
/emXqR9ufoiBUtj4y2UZRYRZKdHE/xwDe4SjJXh43jUGDs4cGImBmOm29suY  
7yuqxWpzYxjXNpTI43zs6om0zZvA51m8phHx/JuOdbjiNI3PUxZM3YHzmb9v  
c6HETAYqvjzcwFrE+pyZ66udx+99brngjue3Yn7z8uC/MeDORMdzflJQt2uq  
4SZBOjxZlpNI+k5BcTKB3m+X0iFn3uKxH55/lk0mfLooHZKNyLjvByhIIElq  
6R5xOqyMfdGRgP1Dhe7nie+SdLj0REI9Des3aKRkfb0HY7fum/1DfsfjVSq  
la08HQ7+0ggJwvWTKqyRVapEh27dzPzVGRTkUPnfa18V0lwoTldbn4D1fKpN  
cJ06HQTfng7bR6OgBtU07batdBg9ye+/EEZBV3p001/ejuMzplFrFXE9s0yZ  
03bQoVamJV+MREHT+2QqPuvTiff+6vHzCnIM79MxtKYDkNVfnKlG3D/dKOb  
/jGhw5bMTybPxCioS8bx9L39dNBjqU0W/Sij84jFllWH6HAyTrBK4DkZ/dPt  
mK87QodEkxQg5JNR+cjtzWdt6XBKaU7Fj0NGGscORPaS6bAucfF1AYGMPgvL  
P2A60+HL88yVLw3JKLVydGCvOx2sbVdcYMmTkYRa704MXzoMFMo8be4koYYe  
Z197f/xeuUfLdhWS0BWWduKy03QoEpFy2BxDQlMznVN+5+iQVT7z0cuQhPLy

MzcoXqRDv0QEM10chDzcQg+3R+D4FKulDwwSUVfT2lw9Kh1seMRE+jUiKk91  
c1uIp8NDhbG95sUEdOaYLrswmQ67QoXLis8TkMaypdVuqXSQG26r3GdCQKmn  
suWf38F86rgb5TxxQJdNJ16yivF7H576Ul1mj4xmnyyYlNJB8+crlucpezSZ  
z9WYrqBD0GDamQk1e5Tr5knKrKFD82zuDOGdHfKQ3UklPKVDY5hjFodnh9Y1  
LysRfU4HOk9k9fqjdqgroudjZSPOR4hgy3kp08TSy5MMaMX3W6d6aPTZlVPR  
i3s3dOB8HNrmV1hgiyLUFsuVu+hQJ61NWhNjix65XdfX6aGdbr54Luu0LRpP  
Fbqv2k+H4Jr9v2d9bZFab9S2TYOYjxm7NxBsixxlRbLVh+gQI1jz8RjXFvGO  
0VW2jNLhE2OxWOa5LWpnrbi1dZwOBij5Y9AqOyTYzFq7bZIO/sMvvpw9bYeM  
lq1K0PxFh3vfvi859N4OnTblrKaow078smVDnt7NFCZKLJDgAG/Ulmb8xwd  
UHV+2m+DVQwYaJ/d2MAmol8jG88YyTDg4cWU7UfkSWibWub4rjUMiH+6p1Ig  
5f/5VPfds54BVeVUNV/KkFFKas5nY2UGCKsZWr+KJqNXPRquSI0BPumh8bt/  
kJGobME7ky0MOERoNrY4RkFwTjuwT5MBL6Y2N0fifeAc68ErUx0G5ClFPw3H  
9V/YpHfYTJ8BK+lvsx8b06Jh4dLGA0YmMouXEeoOwvumqZGZhTEDbF7oOhxN  
wf0tovKJJTBg45S6ehnel2IrfjdYmTHAb/nI/PUy309mHpcesmSAepWvQ1Se  
I/qju0/3sDUDI MW3a4TouP+dqi84YsOA8RRa2e1jjsgv/8BWG3sGvBTetLNm  
qSO6PdKQeYzEgMGlXl9icLw9qlbKdk4MMF1qt/Yurt9Vbq037N1wvEL1UaN9  
ZGSRekSe4MWAgoWovq0BZBTR08Ej+jjgz/SJvyZ/Sei7zRs65TQD3r4YPPG2  
iYTUWERhpxAGnMiQCRmslyKnpt4rzmEMyD5TNJ7vR0R8YacFl3AGTOpeo13a  
QETN+wbOuV1hgPuQ89y2IQISinD76R7FgM1R0j9ZVQS0q/JToGcMA7o96gR3  
3CGg0zNeY16xDNDcfqkjKIGAcnRHvH04DLA/ftAgkkdAHwJpfdwez4CvHP/A  
6ykeJjf/zeEMgOu/Nzm962AgI6MBPT4pTKgYqF1pqiVgKJVJ+380xmgKJWQ  
pzhLQNWuQe0BmQywSmhad3I71s+NX1ancvB534sGX54iom09oS9032NA0GVW  
30XHROQhM78v6D4DmIXZjx+uJaEUm4s1wSUMGP6wf2nGVRJ6FfvX6Gw5A+ou

fj8x/JuERJsul4RWM0B7dN3gKz8yAmEhnbBaBixe2/T3Yw8ZndsXlX/+GQPU  
3I8x9Yyxfi4t23yxEeczadj+MwfvLxUxGeGtDOAYa6pJvMbzZUZMKaKDAeu8  
TtR34PIDWTY/6N/FgA89Jnwj7BeS5UbuOPYwIHFUbls69htv1N/4WPuzwMxi  
y60FGby/GtZv3TXIAL2viedT8byxsXgwvnmIATUvbjnvfEpBLGJakdwoAwg9  
F80vpVOQaNjFnb9+MGDL+btVU44UZB5zYu7TTwZozJ9YzdhDQZHjxKpXswxY  
Kl+em6yl94mcAxG1/zFAXuqlgoUg3kfK9fYV/WPASf+SeOgIGRk3bVx6awkT  
Xlz7/Ff6FRmd75VsiBVhwlKpywGST8io90tf+sUVTBjhGr0jFJPRr/lv1n6S  
TKhYNVDXg+eDrtg7SbI0E5a97guJvEdGpxQaOy3kmSAyXbBz+gEZ3dMoTTBY  
x4SbKs0e4+VknLY7k7RpAxMoD7xfvKsloy2He0tkVJnQPPZIQ72JjLwdrwwl  
bWbChXWTZEMcT8bjwNtTGkz4L+6g0jmcn8GLTl6DWkzoj5/dd2SAjJRirTa3  
6zJhpQPNTPsTGTmmGo3VGDDbwnYZejBERsn31Avu7WbCiXkhiT3DZNRdLXP6  
BmJCMC3cvh1jmTYhPYypE7yfbJ85ifGx950/w8yZYOI2arbqCxmxxvw+UH7di  
gqDfu5c1+PzWv60XCUEykN9/UDLkAxmJSVShA7ZM4Nmf6tf7f70q5QrqE5hw  
cMLpR143GUVpJT1ToTBhh4P/QadOMqpD0TQpF/w5/eaYxUesyEjgabCXggX/P  
mOwMaCajva7uK394M0GS7C308gWev5f38lsDmJDiXGkWF/M1E7eNUHWGCXl8  
9h7rGjLSS1+7Nu8sEz6PjAbwK8no9H2R/uTzTNjXHbB0Fea7sPb3LdolJshR  
8v57+oiMxjs+u4deZYJH8C273IdktPXjKzXvaCaoqVijv8D58pl6MmJHZ4KL  
T8GmNffjKFOwMM+UxQQJaExLKySjT1KpATu4TNhZlHLBqYCMNqgwdJQT8HmH  
NwQewvl30g37KXGdCfVlRYFeWB8ppj6lf1OZMLZW7dXdPDLqsbU/P56083FH  
UFMCY1lPU+O+TCZ0RbbJpuaSkW2wzr+mHCZUj4lvOoIxJ1KprvweEx6KHJhU  
wXhF5h+LxBImrFcpkdHGmPqsuy24mgm3j5oZPsK4vusZx6OWCeHPNl1Rwecl  
fCm20/aMCd3iG8TzMEa/0+WgEfNDenTGCsd3UTiuV6uVCUE7AyyEcPxCnBeD  
ve1M+DSfnP4UY4bC4kjUayZszx35y8PvTdYOmHn3jgkxErnax4vISLky82/0

AB00h4ZVHMd8ZZv1L93xiQnX29SKz2I+S8mHpGlfmZBQ0EZ5hPIGQ9cUdL8z  
QWtUvXaohlyeB1ZufD/JhNKzcv/Wl5JRV+RWHb05JjgdtvO9g/M3VSBY+MOy  
WKjbMI54C+c7zMjEniEWC4bITK/5MX5ffajjTolYIMUJc8ZwvdlIOF3oMSsVC  
KCt75SLWi0TPlxNM2Vj4IHv711AdGSV6KJ4xWBsL3x10smYxVvxuH/ZxfSyM  
CoUrv6vH+T4XezlWORbr4dBmZjMy0hR6RjVUi4UpNRuiB/aHJbH/sT5tjoX0  
cKHYpVife+T1EljbYiEypbefhXHdbb9UI+1Y+PrDmreAsZVmxp3PurGwaeL1  
ryMNZETaJ1W8a3cs0Of9+ZSE8XHClDq4fbHwkLz8GwXjicGyht0HYqHLYvq7  
MMahJ3+8/GIZC4XUKhsGPu/vb/VujnUs8Gn9jsM4nqgrLu/320DvV7US12As  
vijxaNguFp7GL2Ep4fj5CW3fuMRYyI+c2///9yooC/80doyFoXmV5+lPcX/J  
M/4z4hILnRKBoID50tgZIsj3iIVVB5jVJzG/D57kiyKfWIgjmX5KrCYjI6vP  
kl9PxMIeXf6XFFxvtV0K8vEBsSBQdelPKM6XhautksmZWGjrE3TQwPl8+ZW+  
aSwkFliXNmwtwfl/vzinB+GxcH1EXcIS15MXXWfPt8ux80TqKpoN1u04tK9p  
YmQsMIF/UDOHjP5seWszzoIF5nbPi5TbZHTtoQQpiR0LskEPbPNvktFyZO5q  
youFqv6k/a3XyWiN3aOA50tYL4Vaphe5ZJT+fjxk/81YWBwZKBNhkdFmX7Xw  
ifRySGBtlnePISODS3yGWU4sFD256nEugozsss9kT5Zi/vYS+9f54nxVkBfG  
KmMho/6VeJA7Gbm07Dv25XEslCusSliikJHfD6n/el/EwuvT1dXfDuH4DIuP  
1HfHQvLvpWcdt2P+GqZ/J8zEgvpJq+2B30motPedFedPLPg+zDMmfSGh6m91  
aYzFWDhOyTc2e09CjZL8g5eXseBP1pJ+jTYSGiTq3fSVY8F7v4MGpwtISHI0  
2GyPAQvmCKsoYWDISOaP4/Wdu1lwI3SC7OpHQgriZhPaiAXz18XYfp4kpK4j  
k6xmzoI4Jfo2EQIJaZoujCtZscBySbLL3aMkpGs/tG/tERak+tk6Xj1IQiis  
5NtKAgUWLN1uLo5IyIyRCqIUFrDfRiw2GJGQVWpUgpALvu/0B5k+PRKyKfQf  
W3BnwdL04xOhtEmIUGtvMuvNAh8DnUnlbSTk1GkcP3WCBTFLLbS+7bcZ+d0jt  
67cAFqj3fRGQUiMh3xlxNHYGBQuMpe+MNpJQgOhv3uBZFjQOvTg1oERCQqrv



R96dZ4FZxYHNooookFKb53PjNJRZs773uXb20hCJQAbf9KgtMZPvjBDGOskkY  
bopm4f6wacWAAgkxPC7teUZnwSs1tjEJf84J8eY8ZrGg6bo2PXQ9CSVSD38p  
57KgLOCFYILvS03eufthAguenbksWqFMwvWhGFdwHZ8f6io8pkpCOdXCQ9k3  
WSBm3fegB7+n8OV3o4zbLBisXxHM1CShksE3rNS7LlgoXF4oqktCldM1nxJz  
WZDW/72BgPmrXZplyC1ggeCGV5vCTUjohRw7lvmABa7mrZqXLUioZUvox+hH  
LAhWndvnY4Pz+Sj7gnEFC2r3COvRySTkt69X+mc1C2wd7Dlv4fxWtokV5Nay  
400su8kykITEKMBmbs9Y8DfPq/vHeRKiDAd8kGtKQcjMlcVzVLxPBqWFtbWw  
4Ks75+wwH+eTKZS/+zULYst2b2A+wP5RXt9sqpsFax5oVbQ8JaGxO97vs9+x  
wOVrw2mR1yREr26UIP2E+dRPFYmel6Eeyz85LV9Y4EjUOfJKHPuZN9tMr311  
gfvbdVe3q5BR43d2yI9JFjAl8i9o2OD6vFC7MusXCzXkjClvcH35LpvOcppj  
gfbfHb8krpGRyAaH3qZ/LCjPXX40AvclQj416MoSNkxp1L35hP1BlmH5CkMR  
Nmy14L3oHcR+oP5r5ncxNqxx9o768/993mYdypRgw6UW9aD+ZRSU2G/9lrKa  
DbjTT6fl5LB/9Y04LSXHhjRNIRP7VCjI4HfR8sa1bHjXr2v0U40Coq9+zlHQ  
ZMM1tw919doU1LVS2nJnRjY4ykn7W+lQkFqK2ZtvamzY6FyRqKRJQSHqoYEZ  
W9jglvY27C8+71lxtghZkw1Px12vn8H3yZj0pkvqsOHvj6xdxiIU5NUitvuF  
HhsMh5Kb8n/jeUI0fh1uyIaEpSoVEthfLRkK8NfbwwaTWK2wh63YD5xOEx5D  
bLAvzQsdx4lY6HjVropG6Zrrqkt4P5nKqv/aqUVG/xsZw/PnyQj3m1vv2eH  
2RDr4j972Rb7le1JSy4eY0OrykSw0i7cn8z/7Bwl4ftFm2Q/ijBRZ+e29lt0  
bJdsb3sUMklCKq70vg5ubMi//sK3oJeEnp6rTak7zgYJ4qkHR4pIaNXSab3z  
J9lw/OoPff9UEnLjqLZpn2LDh6N13xhMERq/3sFnOIgNz9+2WwtfliGBXOq/  
1FA2eGgjt0/E/cpmZ3my3QU2LPru+RrqS0LpT7/uEItgw+fUE6tVsZ4nD69r  
qb3KBSqHoKfx7iQE76y9zkXjeA6YBK74fr1ifi7nc6GDV9KY3VP4v44XZQ4  
FMsgddPE6XPkZD05Y/aNzhs0Jrb5/8X6/3yCummY/FseJXM30I9nYReJpl5

iCaz4dymIc803E+V1EL/e3yDDX2uS+af1ZPQY+Pe7Zp32HB9KMTFYxr315uh  
Eh1ZbPDRS9BJX477/V/pH8F5bPC/d+tUtDKef84P2uUL2fD2kp1WmgEZYt0+  
cr/qARvevDI7+QKeB/5K4xzXR2zgfmo4m+mC/UEE/cySCjYYda5QyzuF6+GD  
um12NRvmOpfcXIPnT4DJM91DtWxYZqTtdZmOv5/mLv2jng28sAcTPB7+vsC/  
n7wGNITsDuEM4XkX6JbaZdDCBtLnEGnbNDJ6Vrvr0buXbLB+e39fRQae9xvf  
JkR04vde3PRI9g72x1dDQlW62VCm39HwDX/+4qMU8UUvG74dL3wYhH+/3rTI  
00891tf5miA/fH5QhvUaiY9suNf+5+V9Dq5nobG5B0M43jZPnmo03j88ab00  
o2x41Pubmh5KRiH1apXz39hQTywMffYmo2bVupSbP9ggWMDYpoPrXznK9eK+  
n/jz87+yhI3IqMUsxZj+hw10/nFPBZfhz+8aKm5fxJjwH61qgoRChd/87RCM  
g6MSvQQA1mOrd9BAiHAceJROvJvpwHp9Ifkzfl4KD8t9Ei6HM8H9YK0avE4  
CHV9l6SH8/uSanXFbVUcPMk011DLJiG1kRG3pTJxkHf4UzDzLgldsljelyMf  
B6dizlmXY9yRrajivS403IV2G5vi76uL1gpNKsXBy/tlvLFCegr3df7MV4mD  
ZfSItCB8fmfjn3pD9TggXFlffAP3zy1bkzP7tsbBytgNCptL8Xyi74y+vD00  
zt+W3dxdSUJbrU6bN+jHwaLl09FPWG8ReSs3nzSKg/xo5ZS1jSTUJZYvImkc  
By2LPYWfWkhI46TlaLFJHBxc9bZYsp2ErrR8aSTsjwNpORHdoFck1L0tMveP  
eRzl+zuU93Xi+R6rzLhlfQf7AgtfKej+fW28xs/0SBxcCVtcLoY/77F2PDR8  
DOOFLM9Rfj5Wwdw2hkMcpPnoUkKw34hamSiuRY4DgZ9iXxuacT297Gg76xYH  
S/YpJKo+jyGqVmDhWq84GDoRm0SpI6F+9oq4muNxcC2ybrb0CfYTP3JOUz+M  
g4h9lC02NSQUc9TcRvhUH0gb5dGMqkhoo0izTm5QHPTsz6ORK0hIf9VVqcOh  
cfDq17k798rwwD6tND15Pg6UD0n37cD8DXZUdcZfioM683CtryUkZLCD/NDo  
ahxUjhTf7HxlQrHcGX5/VByIaJVtmSgmoU9T/JArMXGQu5bevgdjQ9sdDmqx  
+H15W3hVOD/iuy9HynPiQLjT1IaC8eDGtgdi8XFgKPRNYeY+jnfKV2LqBn6P  
coilAsZOvaXGQ2lxcEPCIT8D978dT5eefHsnDu4NWyaqYfyOk95Qkx8HpfYn

lsoWYj8QNvH7fIEcaMdUzV/D+oh0M1bLflj5aojaP3IP50en5wqjKg4KhO+2  
cPNxf1yjXnTpSRw8XbKwvCePhN78C35/uj4OLPddM5PBOKJdcjexBZ9/YX1h  
YA4J2ZY5+1q1x0ETdX4jC+tzc1p+4t7XcXBgkP/iThbWb6DFT9U+rK+aa78r  
Mkkok5CwUf5DHMwLhglX3MH1gT4ffscB7TF7sdFGSS0UeLyvckxnI906V2R  
6SQ087v13eeJOKAs4112TSOh5vcKy990x8H4naoLurewHyso9a75EwdVy2xT  
qm5gP6d+TvKAMAF0jDi02SWSkLXCrSwkwoF39DmRD/E4XxLP9xot58Ahz6aV  
rthvrJhZ7b9tJQee7zakGnOwX3pe2Cgly4HLcyvP+9BJ6FbFG9cV8hxlhb93  
5NJwPgoWZpau5cDD/nDlomicjwSrTXPrOeC/Zppcd5WEhL2Hrw6ocaDrp9T6  
UOx3Jkkr1/aoc6DTtW6pHZ4H76z177/awgFm82VRjbM4P/rXBp5pcmAkp9ej  
4TT2q0uV9uTrc4D3SerUi+PY391x+HXOjAOPpd8ekHAgOtl72wVHzTkwuOgl  
3WWL/Zrwd5/Nlhz4vl14bzL2Z0PHo3q7D3HgF+fl2fXWmE/Nh4932nHg759n  
Bgr7cf28Xzy30oEDNSL/xfcCnmdsqx1fCByop/49eQv7a5fj3fiKRyYaFcM  
Mt6N/VfjKvpPdxwzfvyux0klOvtZNriyYHcB55Dvdhfl8vl/JfhzYHu6aFl  
Q9tj6G2YSaDtCQ6cr6QOKWiQ0PBW5maNkxw4C8XtlltwPt91DwoGcOBzf2hp  
pDqeZ3sD7R6c5oAa6WOGKvazqhMV4vQgDlww4MXTsf/WTRN+4RaC86UxveTf  
BjyvBW8arQrjgO+xN1UK2H+7Fo90JzngFGUp34d9tOBnvr5Ty5yILallHER  
+23W8xbFU5c58CyxTkd9DfbTofjvza9yQEuBen+NPAnd2+zJUYrkgOoDtcAN  
ciRU1VN4cCaKaz59dwT3yGK90f8IvaRyoGLN8iX+MiTUu9u8+m4MB/pHyWIP  
pUlo9Bv37CUGB+JbbhStwng29b2WQywHxjt8MqNWk9CyI1tHNdkcEDee2i+B  
sey/kNtLORw41+0mVCiF+//9Wko/l4P3ie/2Xhjru4vLIPA5wPrbfn8HxvtX  
k9qYCRw4UW3ClMPYI+SHyZ7rHACJHM4WjK90U4vHUvF7z41I3MI4jtZ5su4W  
ByqlveAfxreMlDalpHNA8unjogv4/oKvJwbOZHAgI1m78//xVqc8SjqYiX//  
cGJ9HcYthwSPbcziwLCGvnAcfu+7BWux+WwONMkbCYRhPsYKkus7cjlgzdeN

vIT5mncZCs/J5wCt1HFJOuZTdJWOwZUCDvBTvv3+gPle8/TiD2IRBxgkhY69  
OB+bgxpytB9w4NpyZZFKnC8DVWkPkYccSHihv8oB5/NAI8u6DyW4XnM4bpI4  
3/bReV2lpRw42XQy4Cvef4JG9ln4VHKgY+sV7iLe16DfO9u7mgOzH3u2++P9  
R/IVXcT7MQecd8RYCmL9DTwv0O5VywGHA59DH+N96F7lqwbPOg6EWxTtzcX6  
vVD0e7PnMw6EBkx86MH7kWXm2hiPFxyovndJ3c6AhL6w3C3dmzlAkhsV34nr  
o+RadI5bKwdMV0153DHF8+xcrqjbSw6k191tOoH3JRv/Nl/XDg4gWcVUJq4/  
JfepRpdODnz5EbBTHNfruIPsVpcuDrjvLpqcIGK9We2iO3fjftM/u8XQhYRI  
+lcPOr3D9f7iT7iwP573W+/mOvZzIHjg0xFeMAn9Vmx7jjAgd/j28V4F0ml  
JyLVTP7EgTCWZe5sLPa/C/oa5CGstx8H9nvh/qc9RWKQhnH/GhbUO4b7aeu7  
dCviGAfyDKSuVDzC9d3+LI8wjuvDhccfg/erE89GxQgTHPhXtf3EITx/lxXq  
tNhPYz2XSDRsHMF+IMN+m/0vDuxQvib84xfeR5PCmHYzHKhyPRIEXEJGJldr  
D9n+4cDLP3/2i+B9SyJ0KP/YAv79pnYXB10y6vcTFT+2yIHTz0JkrPeTUzi9  
TetRIS6M/4mrhuN4XzoYonl0KRfCPPS8D1wgI1mUHHtkGRfu9i+RFWCTUfHm  
QevDYlwYzabNZJaR0ZX1SwusxbnAafQdSGjo6NSW1Za3BB+EbnLqshMhr/  
c6rNajUXjv26USYmQ0HqL/8dtlTgQm0n9bnlJQr6VadaaLGeC/F9WvDwOgXV  
l1IIWChxgd4lJ7JQSkFut+NeHlDhQutOoeGdvyjoesiGo/s1uPBHsnEg57wj  
8j2xv8hUkwu3f04+8Pz/36u7HJc01eJcqrBUunnydI1pqxzy1T4cL1W+D5L4O  
06J0i6J200VCy5DjjLyYE0o3fq0N+lxILFnQbtdwQqd2zMaZGHDhTnnCx5L  
J4TU100iLy44eBx3Zro7IfF1JjZoNxcUVIuzx846IYE2Wuc6Yy5IDJxe/TTS  
Cf2M6LCf38sFx7Y9T78wndCwztq33SZc2NWqJF7AckLvPrmTS/ZxoevRpkP/  
//+xtvi8Pu5+Lnh603WHXHRcTeY/nU8d4IJM6UthJR8nVDK3Z9DaggvLImN2  
VFk4oey8KA+Ng5if7IQH6RucUIpT25DIIS4clZ412DfhiNgScse/WHNBtfG2  
jUSZlwoJy6ZbsMFkTNi0IW7MV9qk98v2XLhbFeguPgsBTl2G512tOeCrqHH

TOZ9CjLd3RwiR+LCgV7TvVwlvA+Pr579SebC7pjuMYcuMtp6y/H8K0cu1Mma  
axxgkNEqoe+XYI25sC1fWIA6T0JLSnYK+LlzoVNIYdgS+7MZ74hrFp44Htl6  
wbVBJPS+SZImdJwLPqZSZilzRNRxkbR80JcLLJ7cDnotET3bfptZ48eFa/PX  
9BVjiajsw9eVN/y5sMXxxu45RyLK4+pywgK5sPpGpna1DhHd2n9xNeE0F96l  
fv4ntoKIuL/r4/WCuEA0u5lE/UZAUdni8llhXFA+K/e5o50Awsg01yf0cqFv  
dfxL5lMC8l9xa13rOS5YCDqak8sJyLVm+GbueS6sUrtv0FdGQLantJVpF7nQ  
79LDfFhLQOYbwzK8LuH4E9boRr0moF2va9VML3PBMv+R7I9JAtKMXp694SrW  
X9vmk9priUjZ0Hbr32tcGKi+cjXTkoikv6bkv4viwuvqKr3jl4ho2Y3P28up  
XBg8FmFCKSWiP9aa9xNicH4EAj3cpolo8H5NiU0sF9oq/YZ0TuH691hmqMXm  
QkB73eNa7CcbZI5WrOBwgSkxkDUxRkKVL5L2f0VyIWnBnXjzExn7z8GaF3wu  
/Kf4K7HliYxua2yFzAQuNM/sUhCNI6P4/jN1V5O4ELSi9za9ioxi2JVmrte5  
YDcY+k3uIxldhCUNxje4wJ0vL+Et4v1y+tBBhZtcuPBQu/oIrmePzPiW2Vs4  
X09ImxbUKMiB8P7wm3QumKzctfKcDgVZiqp3FGfgeHzO8c8bUJBxZaAtJ5ML  
3gmVb2sw1vYv6wrI4gLNm3f+L/6+ipIA8VAOF3pTxb8wufjdVj2bsnjwnbh  
TQ6U1RS0/BrXcdk9LgT7/2sbmyOjBb137z8XcOFKivld1x4ymvyi4va0iAtr  
ydq/gu6T0eekk59uPeCCWVDn4MAVMnqn5yca/JALxYkrhGOsyKij3VfL4hHm  
77foaxtxvP+ePG6/rowLh7RWGS3g/aZaxOfCj3luXLo0tbEtnISK73il11dy  
QV25Z487nk+5Jp4vkqpxPdg+QXm/iCi9z3385GMurLHN+Hy9gogSz7mthlou  
fKaEf95II6JYaVcjmToupOVazuq5ElFkbbPLaD3WxwWhnqf7iejClaeo6udc  
oKy4i2oMiOj0CCWP08CFyrz0D7sNicgnktzh1YTrZZXUKbm9ROS8gTRj1ILz  
qyJ8a8yciOyrCotXtnFhvcFJ/c92RGRFdDD9+BL341s7/mzzJCL4aef7qIML  
bwwNyyaDicgwzpzN78TnVyfrOUcTkda2YyXOXbg/r5MzvJIIRGoNR9/t6Mb1  
J/SYPZ5FRAqeRwSW9XChabw8NRrrddU/a/V3vbhfaHru0Hv+fz0fsi7s44J2

P0U/qJOI/hpYBV17zwXFNYj15D0R/eq0TCZ84ML1//Juk4eJaCzQ4rHGR9x/  
Mkw+h11jvYuZDy1+4kLE5pTsgQki6s4yE3s9hOoxm+Rl/p2IWk3362QPc2Fr  
yFfNslEiqh/YR7g4yoU99/yW7f1MRJUXIPzoGBcKWgfkNuH77suZZKiOc+FT  
hN9/Fd1ElFW8t3H2Oxd2+OseM+8goptHjCdafnDh517HRzLNRBQ/tlsmfYoL  
jJvLn596RkQM6q7dIT9xPeh7KGY8IaIrKkZulr+54HTavKS3iojOPTagrP/F  
/eDzduHicilKpOy8NznHhe97Eu3XYn68ZvQ6n/3hwwT5yxmSJURE4enOJS9w  
IeTm14n4Yil6prVDKWAR6zmra1fuAyKybNY22yfAg4l4iLTGGPlo+ckK8WDY  
d3tLBMb6Qts5X5fwwFHLhhTg32vc2lZal8yDfY/MBp0e4n6zW6OfK8KDZ/Wm  
Wl74PvnuLUI+y3kQ0tz9+9gJlpII2rxl9woe2DQJGKrj+JZKqB+RWMkdQm3t  
10D/+0+uWsgnCR7EFMmpXysjoskDqimlq/D9iUJdy/H7hj9urGWS5sGp0Kj/  
zmH8/pLysIsMD+yXhqe2Yty1do04nhwP4lprQ5dh/Tc/UtQVWcODfFTmoYZx  
7bH1pL61PLhLcXVTx7jsu0JE0ToeXFGuOCWocSF9bWakIg92c55xuvF5mZvW  
NBM38OB17tX6KlxTnspNbtvIA+uASRF5jLnOsnlCqjzlfLkYXjjZmXNu5S  
44FyncPsCH5PRMJqjxx1HhjqlFL3VwFj/7FetzC082N5t22SG+Rizr/0vTYMH  
NHrplBnmK10/qfGGJg/GWHfObsN8OsgEjiRp8WBW/fP5Ocy/2C8zD74OD44l  
I9V79/F7Xq/TjtPlQcqmy4nmRUSkyW9qpBrwgJrRFaBzj4g+BaUnXDPIqeDa  
8HVX8ogoyfacR8RuHryq3K5elkNEQqs3LZxFPOAuw770ZRJR+dR/jWeABztM  
nYaaMrCeXnUmBJjy40006ddp6UTUy7mi7W3Og5pmPZmlqUTEpk1ccLPkwf7/  
tO/zrhORmY1Wk5MVD0jBV9qXJ2H9S/Z72B/hQaXl/m3FXCKisg0T9xN4oDdh  
5/wD17txolSnCYkH/2p/r31xjYimD3/R3kPhwZm5nVeol3F/Wclv0nXhQduL  
R1m9YZi/2ImFjT48+DSuRdA8ifk7+bxJ0ZcHC4aRU4+OE1HaodTEtX443tFV  
pnu9MF8rrHskAnmwwtz04qAzEX2k3/UUCOWBVGj705CjuD+eCNdZOMeD3lCr  
4eXWRGR9007v7HmMz/yyvIvnZbmoYNKPSzx4rmyz8uc+/F6aU/NANA/mv149

I7oTv/e4XtI7Gg/2mHX4fN+B9Wsu5tVNx/xt36/6UYuIvJeV/21j8eDcWSmD  
+S24fw2zm5visJ535RVuUMf+47l30nMuD27xFrLIqpiPaOkdNQk8UFU/d3qd  
EubDa+xveRI+T7XYLnsdEWWbPW0uuc6DigdRH47h+e6klpx0/wb+/O5G/np5  
llq99JTXvZs8EH9V9V1UlogaPx/YkZPGg6ei1MA10liP9esX79zmwYsND+Ot  
pTCfd342p93B+f969kOWJBF9vdacdOMuD5J2Cb7cIoH90IYX1LPZPPC+NGX9  
VRz7neqnZ4/mYr2psXpeYr9znlzjtTWfBxJnHXPeieH+P1Nut6SAB+kln3+u  
xFiLX2L6vpAHGlsLpk8sj6LlOvd3IN3nAX2NSf8PUSIaas1X5hbj+qxqVR9Mx  
fnwiW/JkCQ90L/cejsA4edmdRbNSHuhfmzSjYxx859Z3pXleXJD/vrQe4yOQ  
0j9XwYMPUYTnmvj8Le8TWjqreGCyqqSmAeMlF7iV92p4EPovdlMCjmdAjpVL  
fcIDt2Rf/UQcf/nDmGS3pzzoUX65sRW/j28TRdtdj/U6YlBjCL8/8PvIUJnn  
PPgsbx/ah/mxZFz0nniB63d1pHUZ5k918zn7xkYeCJb8M2vE/C7WB+3PaObB  
1uUFlsJyRNTjFqgb3sqDg6y3poFriOjh3xMbCS95sHriT+ASnE9fQ/d/yztx  
P11QOPRQmYhMu5wmPr/GehKWDHqJ9aB4hvS+5g0Plm+PlcttJqLOvKNVZ3p5  
sPyQRbw21leBxaG8Q308yHn4JE1AF/effPrm97j/ugjUfEP630vEjrXO8gD  
LXfFJXRERGuqdvk8/IT5X/omTxrP+2niTgfWEA+aco4dabMgohyupt6+UayX  
vjJQl8eI6JrWFpV1Yzzo8twdJEfE9diiKvX7G9ZLVxqR7YT1JrzuR84PHpTx  
Q9okfllO/LbcwLUpHlzb29clH0hEDWh1m9NPHpQ6DD08FkJE4WHL81fN4nqM  
aR0mXSWikW+zPmGLPHCNdThae5OI6mJ+OtgK8MF4WT498i4RpW76YaYpxAej  
/Q20+QVEZOs6rDIOzAdKx4Vb+ngeai58IKoU4YND9N0/NxqJSOT6e4H45XzQ  
bah5Hoznf3Vn14DFSvz7qveXr4zgej/V0bZRkg/QGUapwv72jHhr9X+r+DBk  
suVi0CIRqZvXpxTJ8CF/dMzbXZ6EuBUPCPLr+XDil0R9/FES0kiJHl+jxIfp  
976LDm4k9OwC+ZqCMh+C3JL3Pz9DQnN7BAsV1fjQ0vZuoRrv37z1b/ZvUOeD  
n0javHUeCWn+zelV3sKHqHM3pFle4339sY2wmiYfSpPTMi98JaE/t9RubNLI

Ay+ZlCMrgP3x5TmdzTp8CPW/1xMuT0aNkO6koc+H99tpHY8tyUi7/sdDHWM+  
THlXJV54hD+/U39QF/Gh0f5v2GAnGXlEjX3QAxyPbVqezhQZJR4wWWFoxofK  
tT4r07DfXWxge+y15oOoygMrxSoKSs7xmENH+FDSc3ejySAF6dIN2GDDh8Te  
J34nljkiH6uBiv32fGAQX3gNOziittbtUlZOfBjhtZ/5JuiEfAoEsw+58EFg  
LN2uUhvvp+w3xofd+BDxwqm5yMUJ6R+95GvjxYcf92ZoirVO6KX2scVjPnzI  
FaYSb047Id9Vm+LtfHH+r3q02ao7o9RXrU8I/nyIr4hQLoxzRgf6Q6kQD7M  
NZC5W586ow5eyDfyaT5sKBkuPzXhjPyCLa86BmE+ZFW5xnluaKn9ennnEKyX  
aHEZa0MXdEt/8p5LKB/MUtL3UGxckJHsM103MD6kjPcLqrq5oM7fST3uF/hg  
LvPEzcPbBZ3sPhnoGc6H3blmtl0u+Lwyk6XeEXw4vv9kh/4hF6SdIrPFT7c  
vaDzxmQrPi9sRNv3Gh++DHMpD2adUSep6vmJKD5IKbMoBx45I/9dcY4nqXzl  
a72fU+HujjYpeE75x/Ah8KPSlPISZ5T+x4AWyODDtxblsZebTmh3n5ji6Vg+  
NBPWPrq03Ql1VQ0Un2Hzocj6ZPCxckUmFpsGczhw/6w8+ad4IgynCkhofH4  
vhs095Ms8b6DtMTCEvmQvPkrvbKFjLqVhNLPJ2M9yzz7a25DRssHc1vCU/lQ  
tatvF9mThLLy9ITP3sL315Lki2dwPzpbgwLS+VB+T4c2yiGiDyYWYd4ZfjB8  
rN98H8+7cLFXD5wzMR8670gTbwlo7RvKN4csrleNWXceRRFQadqQ2pEcPhxr  
Ff2rtluA7PwCXcz+OB9IqjMdMYBTerPJaF7fBjWtdu0q8YBs5dfWVQIPpt  
se66QpwD0mhesUL7Ph90dPd4//N3QA3xCWabi/lwsU+l/x/RAXm5bojYUMIH  
g2RTG/1jDkhQI7dMvpQPqhliMo/IDujWL90pyXI+COl9058S5ID2PKnWEK3k  
Q0KUfddCqgPqozt7CVTz4Q3ricyXXgd01r7j5lwNH1zWDXW+VyOg1Rsobyef  
80H3aMhm9fMEZF0SYPWxng/XdVu+nML99WvEbGTvcz603o0JI2D/Qz14teZV  
Ax9IFhk/CbifPBmI16lrwfwveffrVD0JOeUq+VW28SFLdvJOwAYymgvOuVPc  
jt9nZss6GkJGCUj3fd4rPqgwww+I1pKR7vjquTuv+fDxy5gbQ4CC2l8fsLnX  
hg//jq4NadSjIP9b7XT+W3zeuJioFgnvpyfI9cxePtg2qDxxCKKgLL3PC5F9



fNh1cVPvrUgK2r/obxD+ng+Ze0Xd05kUNNg4cyrkA+4n+2vdp+gUdll/Jdf/  
Ix+215sOb4mgIAUXsc9en/kwMBk1//44BZVtiV/v/AWfjxSelW1OQfY/FQkO  
I3yI0VScW69AQVM12XGHv/JB5q7zfbfe39kx05oOfOOD+m3dRz43yWibXZUQ  
+o77DYFrcMla9yvFA8YGP/iwZD4wJniChLxHX57VmuKD+5PaR+sjsUjoIall  
/ScftgYorPMQJ6G0S59GlX7zwWf6lnQO9pfGlv4q8rN8CFsSuFRDA8/b1T00  
kvN8+DChahnfQEBn3190EPkP91sh5138YjzPnOXt/xb4MBH7SPf1DgIqDOKL  
zi1iPfU3sQWWEEdChvYqmkwLxcMTEIKfhpwMaFcm+OCouD3ueLB86M+eAojt1  
Hg0ujQf50SrXaWECUrlZOdGzLB7eExIlZBUI6Mlxsy2vRPHvz0sZGekRkJPu  
S/cmsXjYUnNXtflAc0vEG88FY8HTU7LmvkAAkps+NhVIREPCm7/udjFEpAe  
76RE8ap4eJBSsHdzLgF10P22yFuN7x8+vaD9jIACnl++miETD8vkfaofvicg  
sWnRqhS5eMi88Kug+hcBZVfzfvHWxAPvi/WQPfZHZrT1WkyFeDiomR5Exf5w  
mWQL3X19PKR+zrX/hP1GY+L5L4ZK8eCovkq3VQ3vm0pb9kkox8MF03t+4SrY  
D2d1pw5tjAffzYn+v7FfkdCKnqtUjYf2KnGipAz2r4/07Lmb4mHD9H0lwH7K  
7jlnBdqK39NwV/7xHAHJHDY5LrMtHqQ2i+rO/iCg7q7vdWOa8UDLr/pPaZSA  
kp1SlZ5qxcPmnQdP5H8kIMqQ1YUknXio2qHp0tpPQOv9598E6MZDXPII0tse  
Ahr4mb3DTD8eLsXtfFb1hoDSLxJYCgbxEF16+Pb51wTksUT466RhPGRtb/yx  
qp0A1JgPzRp2xcOnX5lFV18R0PBqj/Sbe+LBQHxosAXjnJRVC8F74+FucHTk  
D/x9P5UnRCuTeNi+jZ403kVAmnkBD5X3xUOg/rCyDe5vEzvWS86axsMb8Z/u  
Mb0EdL+i2a/NDJ8fbNkX30dAZ/adf3HHPB74/2u4yuOp6qJoiUiDKUqEiEKT  
lFI67VRmkdz7Hu9FKX2GkKFBiqJkSKnuEEpCiaJIQsiQBqFjyJAppBAyD/nO  
n+t37++cffbaa+29nTsuH8f8rH+3Qvm0EQVdPeUnNjpINGhZfdbShIKOGZM3  
nzZjf6y98E3NDOcj3vuveCuJTh3Q3jhlTkHIZ+1g/TYSbfnZEvnfgoLNxzM  
jX6QaNijsjt5L87n50WGZe0kKhhBRuf2YX6dDQq+YHwuoCeBJChoWXK1wKKD

RIJXTXizbChYa1o5/h7jkNgkySd8CqYum1xjMDZRI92D7SjwoeyRLsbz0gTL  
+AcoQH7Pop/g8yo3PlXVdqBASviC7yyMr+YfPD/nMAX0PiNfbRyP5W7xxiZH  
Ctq2WC/bgeOVrCjYnPUfrgd2bHQVfk+VtRt12ZkCZ/2wSyP4vUyDXJ+DKwXt  
Mlzruzgf3MNIprpuFGT0ZnZofCfRku5TSWIeFAwkDJRSmP/Yia92eV4U7BXj  
hszF+T4QdCH3ug/+31fltCzmQ3mutozzCQrmaSyqnoPr4f6SyArp01hfpQVd  
Nz6SyCkeqXf7Yb4PyzZXU0kiDY2eC8VnKchPb5xKfU+iVF0TPY/zFJQVCpjz  
X5PIvWiU3R2E9aMjuP9yCYnWGSf9lbtIAb8kTyKhkESZXMGHb0Mo8AuLDg70  
JVHeyQJZ5UgKIlMmXTakkmjbzt3yStcpOCmh2WWL9VuwoFxBgcL613x02+ke  
iQrvfVNZchPna/02s723SVT6ZXC1ZBw+31ol/y/Wv8Edv3Xi8RScSFeZagwh  
0VsXAe0FiRRQrdax5bifls0U3yz6gII1qt9OFJzB/KzV1Bd4QkFql3X8Suwn  
FhPpu2ZkYP4T38x3ccb+8Xqz4b+nWA+ToS8LHEn0eb+B2fhzCjQ6Ljls2+F+  
rF6xZzSHgrka0rI7eZivwX17h19QUOJ+JnCEQ6Ka8IPkwEsKxuxODjzfi/ni  
/OT2FVEQk2eV8WYPieqUPXi9JRRwA27dHjMEa93aH93KQU7z41GWhiTqCHn  
zIFbyhwuynq/N6ARPsVzjr08x2u/7gTAh67sj4twxw73mOsc91DT59E9vIS  
Tj8q8PudEuR0gETNnaxL6wcKfjgj+5HJDr4VMGt+RMFrEzGn2d6JGr1v+fx  
/QuOz4Lt2b6VRIdMVnk1fKXA829KwxSeN35IP/Wpq6HApak5qX8ziRxbdE/W  
fqPAZGDVlqUYdzwq9K2ux3yKBvkHbsL1cswTFUjBUdm19irYNY1s9L/cxMF  
Xq/k383E2EWMOP+XhYI5Kkb3FDHurqsPqmzDep9h3uSPsdt9h+DydgpObVV0  
WlBp7/XsCinrpEA5I2PxHByPx7Zj4W+7KBjVn+jZtIVEfSljEa9/U3CovLv8  
MY7fs+ps5KseCspX+cV5bSPRwB3BG8V/sF/rR+8L3E4ib9dwurCfgi3d2z41  
78B+oiN5s+AvBeItoKROJ/HBaKi84YoCPZprblmSKLhCsXbuSMUCIm/1/lp  
QqKTUffvZI9RMJQtPI/G/I0eXh2fNUFBgfl/WgrEk1MbEnKmKbgQqZewDNc  
D2feFCU/mUmDzM9vy4oPkOjfdanHabNoal8u4Mw7QqIZGmR6ijANrldQF+mJ

/Ybr+SJejAbveZphWWEkSmmWb/aXoOGTtvEC9WvYL5zfCvKkaNj2xuNmBUui  
W6cV90gtoqH1t4XcQ6yPDbcrhoMUaHi3/YnDI6y/OlVfoQNKNAjVO8YmYL2e  
S1uuoadMA0UsinqH/b78pZ/3oCoNxxGdK+KwHzm2qs92XE1DeOq19Udx/5vn  
+lVjx1oaKsjTPRV4X8/4e85iqRYNcVZWSjzcz/4J1t78uoGGRxPGJsN4n06M  
CMpP16Hh1+yIP8R00chEZm1rxGYaRjzMFC/ifZlZEaxpoEdDxJby8AgbPH88  
0bJURjSUf92ZrezlQa2bG33+badhV9p4nawnB60x2VCQtZOGSBefMa0wDnp9  
tNVyhSkNp2zzSNUiDjo6FHF8ljkNtupW/e0f8D7trxvdtleG2oYSd/EmDrK7  
GtnGWuHvu0NFkvA8OZK0TojYYnyk0HtYn4tit/yK/sGjQSDRpmUZwUW7SuiX  
hftpuOPmqvDyPy6KrOoW8T1IQ8iowZTVFS5aORId0+VEQ7+OgOhkMxdVBhgU  
lrrQcEjhwuNPw1zkIzLw4+5RGjbpkyksm2+DCmWN19geoyGbX/Nv3VYbxNUb  
KS7ScPfxleghee50PP7Oh4GYz5D09A1X7wvDmam+YfQsOJI1KMWxhY1HJE5  
uTeMhvEx1iIr0xatMfsmPBKB77+u2P+n3xZ9lrfX16dpmH3vd0mBFw/5hRb2  
L2RpkNx3dcqE4qHlk8ty02/SULa3os0hi4dOtvwwibhFw8YrLz11J3llydpA  
6kAsDaZehiNjinxU9jqpf0cDXMGxduNd/GRt+6cRKF4GnINy1K30/GR/COX  
o7UJuL7qepb0DeOjUoXyDQ/v0SArf56se8BH7tdWT51NoqFx2K27sYSPFgle  
LbVMpsGIjPUxq00jwhN9ESoPMf+qk0G7fvORc9decvgRDc0Wno9FhvlIkv9U  
4V0arv/CzvCSMT7Kq1zYGfOEhuMOxmn3hvJlceJx+4ZNMgv0/ew6ScfLcis  
Obkjk4bbnccXx3/mo2w1XViYRcPCuwwDlmbw0cGoaJHO5zR822xABwbzkei8  
yY85OTSIRw9WzrTgo6f++6Muv6BBv36N1JAoH/H7Cw7a59PAC5eqnVHAQ2nV  
5wcEi2iIhrzZMVOShzjGbbk1xTRoJd4YGsR8zMjbFZTyCvN/58+mEGtbZHVX  
eKHIW1yfigEtYRE2aELKuUG5DNe32vwFoyttUGJwWeLQexpuKT0ZnVHKRSOu  
ERtjPtBgl9J1vUWAi+K+9065faJheF2d8PP7WD97LV/DFxryG26Uqlhw0N+S  
9CtSX2kwTy5JU5vC+teR4nRUY/7u/j6ik06i3ck+ijm10D//DMeycf/qlavu

DK+jQdTgpZrEChKxVzY9sWugQUrDtK63i0AwM+qU1ncadHnt/2Y+JVCX9zgi  
Nt04P18KGA8k0PUO3pyaFhrqnDQNNQ2zx/meT/ym5jQYiqQx4Wwj0471C9Jl2  
GnqG7TgqKnj/ROccLDppuCvSejxSmkA66S0ayl00eEWYX7KSJFCzys6/g79o  
+E8n5oTsEgKFMokv3nTT4Jv5ag29msD72uwL0b00JGWXR83J1CD339mbn00  
iA1eu+dyGu8PvW8XwgANsZauhvcyCLTmoEaj5CANL+vunvvZT6CaL+H32odo  
kLgRp52ng/3OoMcte4SGnXbdvMcBuH9rPvm3f4KGmYX+42sXc9CW1i437hQN  
qiUJAZauHJRwU6XRapoGk5TAWfvzsP9Z7Dczn8lAwMBO8J+D9S3EvjCcxUDD  
YvG+BksuanjxUUNfilGCaLGKu5HYP7xEo/WEGXAecrk29JqLHq3cNWFTHAYW  
3jcZmTHARdJNZ09pzWVARKMmu1vMBvnTzsz15zNw/b3JOXNIG9Rh2k+qiTGg  
2rV0aGiVDdojoPlaSYKBgTGR68/W2qCs7MMb5aQYOKaubENo2CAFj9hEaWkG  
FicEmMXK26BLqrVS4osYsLq+yd1mtg3qq5cIEpVl4JbygUKLTi7iXjcdEJRj  
4EKA2G6Tl1xUaHTx4LQ8A95VvH8S2N/Upws+jikwUGzG6/XYx0XXn41uH1Ri  
YMbC5YtWi3HRu0v6x73KDjQT5aclsf86KB9V6FrOwLlLnJdThxUVnsvok2N  
geZvp/38hdlo/dWmycaVOJ59T7+P3idRzG7Zo7UaDix7vsoMMMP9btKq/vMq  
BlZzdvlJwh0NOOyScUaBlYtL9X+8IxAVU6vc96sY6Br7HtUSgCB9BRnqBev  
ZyBoTLUnk0egxK+6N/M2MLBo19rLi2YEmn/ZW/i5DgM2xnUVlBWBtuinnkjf  
jM9XeipL9wCBvo92tD/cwuD9Vq3fzZtABo+ViPt6DLRxxqYWhRHosaPtqzjE  
QNbUIEVxIoEWy1PaMcBATmDfn6mXBDr3uSKe1mfAJPRWokA93m9DhCUjdzHQ  
+dT4ot0ggSy37zgfZsBAn2cBFM8lUfbQ6b4LRgx8KsyyL1pGomWPMu0DTBiw  
2yN1hdllOjCH3kpfMwZcK6av+eL5bmDxSuSzB//fl6QVvw/vcx80prpbMuDr  
uknbiE+i4osx8s5WDOj3feMn2ON5X09r+CFrBiZ7Q1Mm8PcbAawm9pMMfnQO  
mDFN4n3ngZELl8uA9kK+9Hu8Px+2D/xmZctAh2by0e94vimXzjMy5zMqJ/Mn  
9DmejzaWDz03tGNA9lhWXxWex2ID167QP8CARNWl5c/WkWi2rjOj58CA4fff

D6o18Lz/J15o02EGhHSmg2PU8Lx7r8FH6wgDly6W0dqrkAj4Mj80nRjYKG+Z  
9EcJ74uSlvvUXBgQG79qaqZIIvF3ocVKRxmQUQyzOq5Alt+AEi05dwaMwlGe  
C8atG6fipI8xkIRSQ1bh/026dcTFvRjQ0q1+novPy4g/FiDqg/kjJlWJ4PuW  
2KT0Cp5gQMda20GgKokCxX7snz6J6/nT2ogQ7H+/S5dWjPkyEDzaRfir431R  
94zdZz8GPr+qFVLTx09LrfuTchbrPTH1WfwqnE8l3fNBAQyEsU6Og6tJpESx  
kvzzDAzeniMtt5ZEacLDCRuCsP6fR76SwfnZ6me9cf5FBh5rR4/8xPhtb8br  
9mAGBAuLFSgtEpEOEtyCEAZaFpzUX7yeRMeMK097XGZg3WBgweOMw9eF31aK  
ZOB2W35aPMaLE7vWjF1jQHF6VdEhj08vMir8dAP7R3d69xQ+Tzv8/t4UmgHd  
2/U2xzEu/CfYFsgyYOD1ubQc37/H65APL4qBERmu+UIY17cXCW2Iwd9NvMQU  
cfxONkrsvNsMHEorTJJbg+fdcv+V7bEMPBpVy5zA7w+Cxpz8OFz/30YkCnF+  
xD03mjLxDMgLBMc6Y/41Y0bdDO/jfP9enuOB85u9gDOt+ADrcX79zEqcf4PA  
Z5Gjybi+Nkf1Lly0909nr6fJqbhe3U+pH8D8MZu6R+c+w/8nV9gILibR8ocm  
YT+yGPBx+jDyUppE6QrJcvnZDCzNcl/uKoXrVegIcs9j4G7Bx9gbC0g0s6op  
6GMJA0+rVpvvFiTR0WNfFtCfGVhrzTPd0UugsTatOLcqBuYU0F8u/SZQMCdS  
y6Aa6+mvkM3XnwS6i8ytR74xoPnoVXpYG+4nGQ/bP9QzMJqotW6omUB5qqIn  
HzRifVpLCBz9TqDqeW+ibFqwfosdh40+EejwOVXN9W04f80jJStqCNT/NyhP  
tJ0BlfKtWxurCDSvHppe/MR+Yzj/bOBHAKXtuXOM+sXAkU05Az6VBFInrprp  
1s3A87nWTv7lBNqRnLtcoQ/7a09ocv1bAmXfEX60eoCBmjX/vATeEGgdY629  
bZCB4S9UvlkpgZlu3801G2ZAusf9cF4JgRSCenfWR3G+wL19xUTiPbd+s51  
nIGhXE9tqSIcz7EQS79JbKkVnKj8w34WdORrTdg/BgoXieVIYzzOV7aPnsHC  
EEed7kldAIM99Hh3JAixcPFR4pzIf+51xnluOIAv21TIGRzG2hzlDb2ez0GYs  
YqiDcbUOeaZWhAUPzpHx1Ribr06Y9VOUBYebAtnWGL9S6QsbmceC3P20mocY  
b12yTVJYjIVRWb30Dfi+DPGwKBkJFmwitzqw1hduEZJTYqFmKgd/c04vrgp

lQcbpVIYWssXFsbvWTR4bO3uRSyg1js6h/F7r/zKz7KWZWH/3obqMZwPoRZR  
dFiOhdqCtu3vcL7O1HBKvZeysODVpXdfcD4HKxLNghRZODAE9X5JGYFcX/V/  
ub6MhZUTv2/fwXy05jjevAoLb+0tbh76QCdb9PDWdFUW7hTRkk6fCfQpda5  
aAULIrmRh90+EsgoVrX/ozoLjq0SHZtwfbykvE41a7KwsOpXr1AjnofCX07/  
Wc2C98qeatkWai0/ZbNAbD0LBXaZCYt/ESjG/T6tsIGFI97ym2f/IZCk41/5  
NTosLEcFN20+8sMqwhN8y0sJN1b9c55mkCNmkVG4fosqK9wf1y0iETWygS+  
Ru9iYU/k2/Kt2D/LF/M4KQYs1KxP/FSP9ZcrNOT4zgT/P7x9Vyj2E6ZpZZDw  
PhaaNjx09cP9YX71cdFFBAuCK3M6Z3NidKG8+Joah4VPo0Luj+1I5JXDj9vN  
Y+GS0DsJa3fsLzci84MOscALi2YqrpCoNLRx1w1HFnlUD0qp4v1U75xGefx/  
LAibrtpx7Q7uV26v6opcWaDa1zkkPCHR3UMSDp/cWOA0p1gY5WC/s7XravbA  
93/4T1S+mESRlg+P9XmykGh61VMD76/ChqMj094sxDmccuBVRaL/AURsG+8=

"}],

{RGBColor[0.880722, 0.611041, 0.142051], AbsoluteThickness[1.6], Opacity[1.],  
LineBox[CompressedData["

1:eJwVIXk41AsXx6euXSjJklDZ96WyL99hLC32pWWQLvt2BjO/362UTLZIMaks  
bSTdUFkGbTdfcS0VUkS76ia7dFveef84z3k+z30e71me85yzLijWY89SCoVS  
wbP/e8uZwal4CYoNpayyb/5FgM1o3rvaf5NHbPTCLuQl/GuF/R0KiVeSv9gY  
PzG8eHRuG9ghbx2mZ0dt5GVUc/kEvdHz1swrJ/mnTc0BG3VjdTqyr7XXroxc  
ilBRg4z18QGoSUGweSUrGL8jht09lIKxMN1OI5PFUN7XHHluMQy507nvLhQs  
h2GvyA4L7UiUccWrRCMIudKweZA0jUKdXEhUAIUKdKHIj83KMbjH50oPyUpj  
gp39bv3XWPQPic/YTMrA+l2gu393HD6YhTRUtMvhdFjaA1NOPES/i1slJSvg  
zkKf/MmliVizK4Tywlkj9TRls5aKRMiMDL8qL1gLPvm6KQ0kYW0u285r3zpo  
NI3fz09JgqaV0UXByPXoOmAtyPFmwOjLsECLtzIu9HT+fPqYAYsSdngMVQVz

WkNrXjgmw/nnsHa/rBpKVP6WcZVPgc9f7NwjfOqwFKH+qGWIYLef0VeLSXVs  
0Tq2tu1JCsLFRty+vtDA/qf37k+opSL+JvvauXZNnCiNkitISgUr2kjK57oW  
9oTPtgvdtMUhhRGGcJk2xiT5v1ZQmCj808gsLlkXlm2nbxxnMVGq03JKOUgP  
VYxcuYQ6JipG2D8GnPUxrvN71cm3TDxzkNO/v8YA8r2v3eykWBgunRgtLTDA  
D4nuoCtgYWz+Xn6qkCE2nDRoFIpk4Z1LMdVjnyG4Kt/SsvJZmPhld54/0giV  
SwKv1PezMO0j5zU6aoSzi8ot12dZWLg6wcf13gBCv0EvbQWBHwjt9QWdGxDZ  
mR9B1SFA2V0cGkXdiLgaCR9pewJ8jTEyDo0b4UjUbFbyJSAsQetQ0t2E2rrs  
s8x4ApK3JzSfyBrj5+Br1zwOAWmZtudXjhoj5mLVBfISAfnY4uwMPhNQDk/S  
lZoIrG2PsQxgmcB269PjnAcEVJRox8wmTVDWUDX37AkBjRS50pWhplBPafku  
PUZAt2fc5csLUxDCpae9PxmWUm/7/cDdDOT4jebKOQLG+4try9vNMLqS6Jb/  
TcB8McaQZWWOccrPoduCGz0aZJe180hxO6NOctBgSaWu6eraYE3T5/f6ZIm  
4TQ6kShYZgHGwbvXnBVIbDNpU3klZQn+HEMpfWUS7nnF/c1ZlpiRalclNEj4  
fljJOEGxQs7cw4MWuiR22dBMypKt8LmDFGUaktBja5Uazlvh/SKm2JtILO1Z  
zj/HsEaugMm75WYkBgQX9jbNWWPHtnJ3BUsS1f4jjwmGDc5QplvqrUkcqLhn  
ZjNnAztlF+fXIKG14OWWZg7k32GHX7YlISXf8UcwC2hP11RcRSPxy9qikdYM  
vBdRHdSwJzEedDVS7TtQx4yo+czjxxnrFIXMqWibizMNdiDRevLE30cmFe7b  
OrkneFzZLXi4k0tFiFO38GEeF0yzTP9apGLJaf0mUx6T0hOfj5rZ4mKQ5/fr  
PL1Q88CyOKYtep9n3v70y+/m/9TDg2uLqlqjuuU8Nj/oKLBx0Rbl03p4joRK  
RTN3lZkdflhWMBupJMQf6UYvpNqhXT80xoXX3+KX8rVDTXZwl/w4eIfX/9sV  
Uk+bv9mhITDXeoUVie5NbPYZUxraDjiL2FqQOPdn9MTuJhr8pGWZziYkcs60  
naV+o6Huv1YZHd68k+97eiub2uPULiiZGSMsW8XMW9832mPXI6dG6JGYPSOQ  
Fd3oAHZ3p9NSFRiv7zCtXBccsHwsOW3bOhIdb/+dNDBxRNZw+MIMRRilOk+2  
zzY4otM/VXRMloRDa5kq0eCE5FI3hpQYiZMvTO8eqd+CW/3LX6rOErBYvffb

+esuq03Lu5Z7m0DBa8bk5q8uSNsyMhndSmBb9YHxr1qu2F6zY5czl4C/ZdEz  
i3OuGGYY/xC+ToBaEzAc4eQG07BYOllBIKQvu3WJiTucRyMd3HMJXF71mjSU  
8uTVY3Fjfhdv/0uP/szv9kGXwzPn2XkWmlryBl4q+MO57m1EhzELnz65Cr3l  
D8Yfn+qxK4qJ79THE2u4oWh1pR+bupGKLJnhw+dbIrF/VOavpbMp2DTPRJf  
HYO2nNAED8sU7FmW+emudjz8YxI8pwqTEffy23i8ZiJ6Hv8T2PGegdh+1WU0  
fgYIn8edYk4MkD2W77iDyTjl3BLfU5uEh0c4RQN9qWjlU76UtCIJImE1Uasu  
s9Ar5rpZji0R2Xyi8v9VkvGicm5Y72Mcv190259evg/mExf05uxlgEu9Jt9J  
8wNYfHbKKK8/HjULXRvmmqbB265UrWRrPLK6ulP+Uz2InpBVtmW8/8KfNq0m  
rH4IczuvymhtjYOgiWhduHI6Er4U2vOdicWh/Qedh8QPQ8Cqk+PAjUFZpbyP  
gngGdC2bzEoeRWNT0Mr4hB8ZkG8kmZ7TUfBQpITjvWcj7fiSaiuVKEg0iz88  
/uYIbl4311Hduhc044SVUm8m2oR/yTEyIqEwL6K4rzcLHkoGikcaI0Dw5w3p  
dWXD3l+n0306HJ6V8ZWTDtlw2baTXwrh6NRIfnW4Phf+ErYPjNLDcMtySFfn  
/FGMxI6rzQyFwsTD0FslJw9CV6/ENJuE4tj579kUWj4q/FYHPMzZg4QPVMfQ  
5ny0J6XunZgKwTj5Gzdr82PoTVHfsOASgjecva9L646hsWZHKq0lGPsKJYMu  
qRXglV/5h0y9YHw8+Ihz+mIBAoKsP7ifCsIxbp2PzJrjyA2pjBaQCoLwWFUn  
eeY4Aqeq7NoyAnn3c41e9uoTU03VU3OkBKI15Zbc+vwTuDNQSDIyAsC3I77l  
nEQhgl4yQk0FApCZ5vm+OqMQ08d0rPIUduOxdu0vv/8K4Xrx2ZdcB398vq/w  
zyKzCN8Hl6Vb+PmBWtWsojhZBENnP/rzTF80lQle0Z0uQtqjoHWmGb4wKPLa  
YDVbhBdfn/kVHfSF4qEJqu+3liQ4PjzInzx3Xf97lMUDkjvZZD9Ub64tjyr  
WHoFB1umipUmXH2hkrpTXMKI6gqyn4kp0r44HVNRqLiRg+KbKz6/kfSF5J6Z  
NXrGHNy60TDgJuELikeutrM5B2IdLFEdIV+MaN91yrblxc/TP35YpKNoVOOQ  
oCcHfRuORDBG6BAByIjJeHNwfvvA+o9DdKR3/X1MbTsH0/aPXP0G6Ejg+pbb  
0zmw0Qznc+yhw+V4/s1DwTz9kuEBpbt03M8coR3fw4F9JVebe5MOywNaXefC



OAh7dH9GvjK0rei253f3clCy1GDk9zU6zgavCOqL5untjfuVWkOH7C7/j20x  
HORUXyiYrqYj3606bjKeA32HW8VRL+gQdPy28DuRA+eOqys/XKDjf01lri4=

"}},

{RGBColor[0.560181, 0.691569, 0.194885], AbsoluteThickness[1.6], Opacity[1.],  
LineBox[CompressedData["

1:eJwVx3k41IkDx/F5/EyuQtNBcrSTWkwkOX4J3w9r2X12ySoR8nsWs+5yjpSj  
GfeM45tjviqLTZHLcdWWUWIVmw6RMzbjltvj6IeI/fX74/28n9dXnucd2RI0  
Go39pf/fbOndQogCjaD9eal/cbrXfCBzrHqGlyZo4o7OmN4clu6FWlGFZ5aQ  
HHXOX2TfjZK9R20WIJeJwCirQ5oRz4nW0WOn0jgbxOH5CEN3fgchqG2q3uEv  
Ab8qZ6+uUTFRFRpqMqS8BVEeqwPMnWNEh4FaQ2WTDp48myvKUJkhVhabrKM5  
20C63nYJX18g0s+Ixm5mKeKkZuBshd0yUSiSL5PzZ2DFKSUyemONeBolOtyr  
vBt8nbDifyol0Nurv0TMK2F8oz5MzKVj/Jj3vZKmPdgoorslXJCG3Jq8eThH  
DRLGik9IXshD1dWb9t5OA3kSz35wkd80JXHfUFHWPhxtbRh0fs6AtrnBLSl/  
JiaIn75757Ybdht9rC7lg0jzitwkpNSRG2NwLJiji7bVsR09AV+jQFd8bb+n  
Hj5Le2gtJmqhRjz8udvuMLr8zB6euqGNvoK5gYIsfVSKY6RPD7Ewt/INMd3f  
AEw/X+9vTfXBeDyn3aFsjNY3w9sUZgzhSlibn00Yg3NRetA1ww]6yToFR5bN  
YZRbXztqTECiVZH+3wgLuDlkGycOECj3ELdfiiAwUkLpx+UBmxbH71vXA9Jv  
HpdYT1nCwaPT0VFkhfxZHw9mhjU+5m/hB923gbbhLo2F9u9xXCVgtfiOPbzG  
DNSbv3KEcUHGBtlyGjvvlVmZVLgh6UFmd7+aBwotW8sf/eyJqakT0qN0L8Q2  
m46wWT5Ys2yfUxX9AnaFWcIwNwB8pb7E4gf+KL6TPSQpEwyjJVFkSPk5uJdm  
v9hrFAR21tSpRIYleqbltJsPhSO4f3UiRDsM45ZHYrYTHJzvOrDVmh4Bmd0v  
qvM0LiC61WxM9I6DAN7Mc85kFF6mUMLutgvoLNizMvz6EmR9qgJ3/X4RzNRX

870XYyCQlNu7XhYN+vfpYy0/xkHllkNcQlEs7iTP6zhxL8P+D23JPNPLcF4u  
mrluy0XVSrNh47+5eLPevOSnzAO/uSVy/QAP73Mq2fldPNC5iwdlvo5H3cRV  
r7z8eEiZyNX47k/AKQdbrqxrAuLjeHa98ol4kthSeYueiMLSvafV5JOWfuNm  
rE19Iow8d4SEfk5CsF9V0OrZJDiq03z2fEjGgruKYOFTEhTq5V9mj6Qg/OLy  
llGQDJuJS+Yab1MxPyU+oXo0BWrLsuqxb/noi1ywrWtNwSV6Zq9eswDTn0Zu  
dnin4mRpSON8vTS4jEVcHZxOxWstzlDiH+nY4dcyLjIR4NZr+6h4gyE9jBZ  
M2t8mDgecdJMy0T4/snK2ggBbhc7fYy0JqF3zvQ+Y0WA0HFL21/qSbTwDP5l  
E5iGrXsJBwvTK2Af5t7NH0/DCBUwXFBzBX8v19mxndMRm8vwwH0wC8qK+3LG  
G9MxyXtFXb+VhUesNtldBhm4lqo5raSajTOdWQ/rqAzIDJa9js7PxuyuH4p/  
k8iEdbKqnkAlB2nTfR/8fTPxMLJhD5PMgVT0A/avzzlh6RLy4IZCLjyCzvd2  
MUikck9+KE/KBfdl1XSrBYl2VvXm2fVc3Ivbt+W+L4npv9TefloS4nOvrLAv  
h4RIWb2m+rwQNKnQE+8fkqgrlKrQXRRcwcX/J8EjEvrCU0fNPwpheveT2fEG  
Eurxc5buq0KU7px8e+0xiTV35n+u0SiUa7rNuDwhUavIv7p7OwWHrM2lt00k  
NC+ckVcwo0BzW9G1up3E9XmLueqGFGqsfHPOdpBgsJdU9Ywp9FTX1Ml2kqA5  
prPsTCmU3tV87N1FQsxq/E5gRYG31P1UqYeEcEArXuokBaWJwcooMYlt3RGy  
Sk4UhD5FqQ6SSQ0P7ly0JlCrmGsfdsXh4rci751o1C7UCjUGiRhn00+ivei  
8Czr1b7uYRJ/pYqts9kUflV+/SN3hITZZZ3mGz4UjH6meR0aJaET9OzvxgAK  
5hE77XljjH7z2u7ZFkSB1r/K1P1AQtnVY3LwPIXfCbXhd19MOpQH4dQYLgk  
CHjjJKRsV1f+CfviEX0N3QkS/wNonPz3

"]]}}},

AspectRatio->0.6180339887498948,

Axes->{True, True},

AxesLabel->{None, None},

```

AxesOrigin->{0, 0},
DisplayFunction->Identity,
Frame->{{False, False}, {False, False}},
FrameLabel->{None, None}, {None, None}},
FrameTicks->{{Automatic, Automatic}, {Automatic, Automatic}},
GridLines->{None, None},
GridLinesStyle->Directive[GrayLevel[0.5, 0.4]],
Method->{},
PlotRange->{{0, 1650.04505}, {0, 1381.627493}},
PlotRangeClipping->True,
PlotRangePadding->{{Scaled[0.02], Scaled[0.02]}, {Scaled[0.02], Scaled[0.05]}}},
Ticks->{Automatic, Automatic}] \) \!\(\^*
GraphicsBox[{{},
{RGBColor[0.368417, 0.506779, 0.709798], PointSize[0.6], AbsoluteThickness[1.6],
EdgeForm[{GrayLevel[0], Opacity[0.3]}]},
{RGBColor[0.368417, 0.506779, 0.709798], PointSize[0.6], AbsoluteThickness[1.6],
EdgeForm[{GrayLevel[0], Opacity[0.3]}]}, PointBox[NCache[{Scaled[{Rational[1, 2],
Rational[1, 2]}]}, {Scaled[{0.5, 0.5}]}]}]}]},
AspectRatio->Full,
BaselinePosition->(Scaled[0.1] -> Baseline),
ImagePadding->Automatic,
ImageSize->{10, 10},
PlotRangePadding->None] \)      blood
\!\(\^*
GraphicsBox[{{},

```

```
{RGBColor[0.880722, 0.611041, 0.142051], PointSize[0.6], AbsoluteThickness[1.6],  
EdgeForm[{GrayLevel[0], Opacity[0.3]}],
```

```
{RGBColor[0.880722, 0.611041, 0.142051], PointSize[0.6], AbsoluteThickness[1.6],  
EdgeForm[{GrayLevel[0], Opacity[0.3]}], PointBox[NCache[{Scaled[{Rational[1, 2],  
Rational[1, 2]}], {Scaled[{0.5, 0.5}]}]}]}],
```

```
AspectRatio->Full,
```

```
BaselinePosition->(Scaled[0.1] -> Baseline),
```

```
ImagePadding->Automatic,
```

```
ImageSize->{10, 10},
```

```
PlotRangePadding->None])      liver
```

```
\\(\*
```

```
GraphicsBox[{}],
```

```
{RGBColor[0.560181, 0.691569, 0.194885], PointSize[0.6], AbsoluteThickness[1.6],  
EdgeForm[{GrayLevel[0], Opacity[0.3]}],
```

```
{RGBColor[0.560181, 0.691569, 0.194885], PointSize[0.6], AbsoluteThickness[1.6],  
EdgeForm[{GrayLevel[0], Opacity[0.3]}], PointBox[NCache[{Scaled[{Rational[1, 2],  
Rational[1, 2]}], {Scaled[{0.5, 0.5}]}]}]}],
```

```
AspectRatio->Full,
```

```
BaselinePosition->(Scaled[0.1] -> Baseline),
```

```
ImagePadding->Automatic,
```

```
ImageSize->{10, 10},
```

```
PlotRangePadding->None])      gi
```

```
(*-----Next Mouse -----  
-----*)
```

```
vn=readTac["C:\\Users\\exx\\Downloads\\OmeM5, liver 2.92575, GI 1.03025, ID  
2886.csv"];
```

```
Lv=2.92575;
```

```
Gv=1.03025;
```

```
id=2886;
```

```
vn[[1]][[1]]
```

```
{{10,0.00362628},{30,0},{50,183.835},{70,237.047},{90,65.808},{110,36.4886},{13  
0,23.7402},{150,19.2191},{170,15.1417},{190,13.7856},{210,11.8203},{230,11.886  
8},{250,10.9025},{270,9.5442},{290,9.8851},{330,9.60439},{390,9.58604},{450,9.0  
0063},{510,8.98868},{570,9.98076},{750,2.99976},{1050,3.12452},{1350,2.06841},  
{1649.97,1.70537}}
```

```
model= mouseModel[Lv,Gv,id,29]
```

```
ParametricFunction[!\\(\*
```

```
GraphicsBox[RasterBox[{{179, 179, 179, 179, 179, 179, 179, 179, 179, 179, 179,  
179}, {179, 180, 180, 180, 179, 179, 179, 179, 179, 179, 179, 179}, {179, 179, 180,  
179, 179, 248, 248, 178, 179, 179, 179, 179}, {179, 179, 180, 179, 179, 253, 248,  
179, 179, 179, 179, 179}, {179, 179, 179, 179, 179, 248, 248, 179, 179, 179, 179,  
179}, {179, 179, 248, 248, 248, 248, 248, 248, 248, 248, 179, 179}, {179, 179, 248,  
248, 248, 248, 248, 248, 248, 179, 179}, {179, 179, 179, 179, 179, 248, 248,  
179, 179, 179, 179, 179}, {179, 180, 179, 179, 179, 252, 248, 179, 178, 179, 180,  
179}, {179, 180, 180, 179, 179, 248, 248, 179, 180, 180, 180, 179}, {179, 179, 179,  
179, 179, 179, 179, 179, 179, 179, 179}, {179, 179, 179, 179, 179, 179, 179,  
179, 179, 179, 179, 179}}, {{0, 0}, {12, 12}}, {0, 255},
```

```
ColorFunction->GrayLevel],
```

```
BaselinePosition->Bottom,
```

```
ImageSize->{12, 12},
```

PlotRange->{{0, 12}, {0, 12}}\)\ \!\(\\*

GraphicsBox[{{}, {},

{GrayLevel[0.55], AbsoluteThickness[1.5], Opacity[1.],  
LineBox[{{9.09090909090909\*^-8, 9.090909090884856\*^-8},  
{0.0874367476365131, 0.08197166587636243}, {0.18222810297558026`,  
0.1358255024317191}, {0.27073779576926765`, 0.13315455086535802`},  
{0.3575112797365835, 0.08143316377978886}, {0.4516394623155443, -  
0.007347854733426912}, {0.5394859823491253, -0.08816932746972758},  
{0.6346872009943513, -0.13787329990112937`}, {0.7281522108132057, -  
0.12816574147938434`}, {0.8153355580866803, -0.07001063326902106},  
{0.9098736039718, 0.02121659675083076}, {0.9999999090909091,  
0.10024804094746914`}}}],

{GrayLevel[0.55], AbsoluteThickness[1.5], Opacity[1.],  
LineBox[{{9.09090909090909\*^-8, 9.090909090880112\*^-8},  
{0.0874367476365131, 0.08090369567458766}, {0.18222810297558026`,  
0.12746559200130417`}, {0.27073779576926765`, 0.1116266937044405},  
{0.3575112797365835, 0.046963725126600256`}, {0.4516394623155443, -  
0.04509050859182233}, {0.5394859823491253, -0.11115559892361665`},  
{0.6346872009943513, -0.12642564594664163`}, {0.7281522108132057, -  
0.07740196037964171}, {0.8153355580866803, 0.004179083230780074},  
{0.9098736039718, 0.08937493944143977}, {0.9999999090909091,  
0.12834702174618903`}}}],

{GrayLevel[0.55], AbsoluteThickness[1.5], Opacity[1.],  
LineBox[{{9.09090909090909\*^-8, 9.090909090875369\*^-8},  
{0.0874367476365131, 0.07984396759533968}, {0.18222810297558026`,  
0.11939549826670079`}, {0.27073779576926765`, 0.09184904274707059},  
{0.3575112797365835, 0.017913117173780694`}, {0.4516394623155443, -  
0.07109962300031061}, {0.5394859823491253, -0.11717052830989395`},  
{0.6346872009943513, -0.09879571259704382}, {0.7281522108132057, -  
0.022693471356141894`}, {0.8153355580866803, 0.06128703302641453},  
{0.9098736039718, 0.11605625481609519`}, {0.9999999090909091,  
0.10415981267620744`}}}],

{GrayLevel[0.55], AbsoluteThickness[1.5], Opacity[1.],  
LineBox[{{9.09090909090909\*^-8, 9.090909090870287\*^-8},  
{0.0874367476365131, 0.07879243663407876}, {0.18222810297558026`,  
0.1116081822210312}, {0.27073779576926765`, 0.07372482040530459},  
{0.3575112797365835, -0.006267252216927747}, {0.4516394623155443, -  
0.08743897872291118}, {0.5394859823491253, -0.11109134853087661`},  
{0.6346872009943513, -0.06371549528296311}, {0.7281522108132057,  
0.02544576624054603}, {0.8153355580866803, 0.09464282937855747},

{0.9098736039718, 0.10731931496853601`}, {0.9999999090909091, 0.0516787429232188}}}],

{GrayLevel[0.55], AbsoluteThickness[1.5], Opacity[1.],  
LineBox[{{9.09090909090909\*^-8, 9.090909090865543\*^-8},  
{0.0874367476365131, 0.07774905743802465}, {0.18222810297558026`,  
0.10409673959866513`}, {0.27073779576926765`, 0.05716133039337165},  
{0.3575112797365835, -0.026084496726167965`}, {0.4516394623155443, -  
0.09591154799603378}, {0.5394859823491253, -0.09685594593277226},  
{0.6346872009943513, -0.02730376120671303}, {0.7281522108132057,  
0.061646715198529656`}, {0.8153355580866803, 0.1046634148537508},  
{0.9098736039718, 0.07509702498429204}, {0.9999999090909091, -  
0.006536873471333553}}}],

{GrayLevel[0.55], AbsoluteThickness[1.5], Opacity[1.],  
LineBox[{{9.09090909090909\*^-8, 9.0909090908608\*^-8},  
{0.0874367476365131, 0.07671378556951527}, {0.18222810297558026`,  
0.09685439581479163}, {0.27073779576926765`, 0.042069810325321415`},  
{0.3575112797365835, -0.042006785469922474`}, {0.4516394623155443, -  
0.09808544986431629}, {0.5394859823491253, -0.07760167026270944},  
{0.6346872009943513, 0.0063643674428021085`}, {0.7281522108132057,  
0.08405712128907425}, {0.8153355580866803, 0.09555213349985489},  
{0.9098736039718, 0.03202960165577907}, {0.9999999090909091, -  
0.054402034659985464`}}}],

AspectRatio->1,

Axes->{False, False},

AxesLabel->{None, None},

AxesOrigin->{0, 0},

Background->GrayLevel[0.93],

BaseStyle->{FontFamily -> "Arial"},

DisplayFunction->Identity,

Frame->{{True, True}, {True, True}},

FrameLabel->{{None, None}, {None, None}},

FrameStyle->Directive[Thickness[Tiny], GrayLevel[0.7]],

FrameTicks->{{None, None}, {None, None}},

GridLines->{None, None},  
 GridLinesStyle->Directive[GrayLevel[0.5, 0.4]],  
 ImageSize->{Automatic, 28.4375},  
 LabelStyle->{FontFamily -> "Arial"},  
 Method->{"ScalingFunctions" -> None},  
 PlotRange->{All, All},  
 PlotRangeClipping->True,  
 PlotRangePadding->{Automatic, Automatic},  
 Ticks->{Automatic, Automatic}] \) Expression: {Bl,Li,G}  
 Parameters: {k1,k2,k3,k4,k5,k6}

]

Manipulate[Show[ListPlot[vn[[1]],PlotRange->Full,PlotLegends->{"blood","liver","gi"}],Plot[Through[model[k1,k2,k3,k4,k5,k6][t]],{t,0,1500},PlotRange->Full,PlotLegends->{"Blood","Liver","Gi"}]],{k1,0.001`0.2`},{k2,0.0001`0.1`},{k3,1.`\*^-6,0.01`},{k4,0.001`0.2`},{k5,0.0001`0.01`},{k6,0.0001,0.01}]

Manipulate[Show[ListPlot[vn[[1]], PlotRange -> Full,  
 PlotLegends -> {"blood", "liver", "gi"}],  
 Plot[Through[model[k1, k2, k3, k4, k5, k6][t]], {t, 0, 1500},  
 PlotRange -> Full, PlotLegends -> {"Blood", "Liver", "Gi"}]],  
 {k1, 0.001, 0.2}, {k2, 0.0001, 0.1}, {k3, 1.\*^-6, 0.01}, {k4, 0.001, 0.2},  
 {k5, 0.0001, 0.01}, {k6, 0.0001, 0.01}]



```
Clear[newmodel]
```

```
newmodel[k1_,k2_,k3_,k4_,k5_,k6_][i_,t_]:=Through[model[k1,k2,k3,k4,k5,k6][t],List][[i]]/;And@@NumericQ/@{k1,k2,k3,k4,k5,k6,i,t};
```

```
fit2=NonlinearModelFit[vn[[2]],{newmodel[k1,k2,k3,k4,k5,k6][i,t],{k1>=0},{k2>0},{k3>=0},{k4>=0},{k5>=0},{k6>=0}},{k1,0.008`},{k2,0.0001`},{k3,0.0014`},{k4,0.001`},{k5,0.008`},{k6,0.0001}},{i,t}]
```

NonlinearModelFit::eit: The algorithm does not converge to the tolerance of  $4.806217383937354 \times 10^{-6}$  in 500 iterations. The best estimated solution, with feasibility residual, KKT residual, or complementary residual of  $\{8.21541 \times 10^{-12}, 0.0000102634, 2.43713 \times 10^{-12}\}$ , is returned. >>

```
FittedModel[newmodel[0.0778523,5.86338*10^-13,<<22>>,<<23>>,0.139687,5.86338*10^-13][i,t]]
```

```
{fit2["AdjustedRSquared"],fit2["AIC"]}
```

FittedModel::constr: The property values {AIC} assume an unconstrained model. The results for these properties may not be valid, particularly if the fitted parameters are near a constraint boundary. >>

```
{0.804901,888.829}
```

```
fit2["ParameterTable"]
```

FittedModel::constr: The property values {ParameterTable} assume an unconstrained model. The results for these properties may not be valid, particularly if the fitted parameters are near a constraint boundary. >>

|    | Estimate                  | Standard Error | t-Statistic               | P-Value    |
|----|---------------------------|----------------|---------------------------|------------|
| k1 | 0.0778523                 | 0.0321191      | 2.42386                   | 0.0181045  |
| k2 | $5.86338 \times 10^{-13}$ | 0.000540747    | $1.08431 \times 10^{-9}$  | 1          |
| k3 | 0.000661118               | 0.000233858    | 2.827                     | 0.00621282 |
| k4 | $5.86338 \times 10^{-13}$ | 0.00363224     | $1.61426 \times 10^{-10}$ | 1          |
| k5 | 0.139687                  | 0.0583347      | 2.39457                   | 0.0194876  |
| k6 | $5.86338 \times 10^{-13}$ | 0.000423265    | $1.38527 \times 10^{-9}$  | 1          |

```
Show[ListPlot[vn[[1]],PlotRange->Full,PlotLegends-  
>{"blood","liver","gi"}],Plot[{fit2[1,t],fit2[2,t],fit2[3,t]},{t,0,1501},PlotRange->Full]  
]
```

```
\!\(\*
```

```
GraphicsBox[{{}, {},
```

```
{RGBColor[0.368417, 0.506779, 0.709798], PointSize[0.016666666666666666`],  
AbsoluteThickness[1.6], PointBox[CompressedData["
```

```
1:eJxTTMoPSmViYGCQAGIQDQEqDi9fHdx2e0uuPYRv58CAAjwdXhZq/tj+Kw0i  
3hDoIBTyQrxhYS6UH+Yg6yXfsLU4AMqPdrg3X+F1h50Th0+Q4NAy36Khbq85  
hH8gyYH9aulDEQtjqHyqg1VR97R+Dz2ofLqD2vTv8maTtKHyWQ4d6w8sZFyi  
DpXPcTj2LvcAxzEo3yHf4e7zmoWi51Qh/AcFDr9rzu1ZIKYM4SsU0Th7imXp  
HIXyF5Q4HPuZLV5kCuUnVDjMan8Yy6sDU1/jsEbqzZwgBiWoefU06qEns0x+  
KUL4FxodZjiM5dS+QdUXtDv8DJ4p0fifHcLPmOCw8YGCP9N/DghfYqqD72lX  
VskeBodD4mrBT4/PdFD54Nqs6/nbHgDtE2yd
```

```
"]}],
```

```
{RGBColor[0.880722, 0.611041, 0.142051], PointSize[0.016666666666666666`],  
AbsoluteThickness[1.6], PointBox[CompressedData["
```

```
1:eJxTTMoPSmViYGCQAGIQDQEqDsuDgqfqHs+wh/DtHErikqevuGcF5Xs61Fxp  
2Duz0c4BzG0IdOCV+qVe8SAByg9zWGTL3C9SmQvlRzsccdtSwdNSCOE7JDgs  
+jN53Xm2Ygj/QJLDl60Vh/4El0DIUx226rDcyxMvhcqno/DbWa43WwzlO2Q5  
KNRoXLxkWwaVz3GYeeHkd8F2KN8h3+E5T/WELXuh/AcFDscbw0//fQDIKxQ5  
WG6OXZj/HspfUOKgceGMxSbucgg/ocLBfPVMgXffYeprHca+rbH/Ggwzr95B  
v/tj2684qHsuNDoIXq+2Ds6Aur+g3cHqe8buzzeh/s2Y4PDJIqyYiz0bwpeY
```

6pAz48+q7dtTHA6JqwU/PT7T4d8jDo45jQkOAB/CehM=

"}],

{RGBColor[0.560181, 0.691569, 0.194885], PointSize[0.016666666666666666'], AbsoluteThickness[1.6], PointBox[CompressedData["

1:e]xTTMoPSmViYGCQAGIQDQEqDo4HMh/MqJloD+HbOWiZPSS9ougN5Xs6WF/1

2vZlqYYDmNsQ6ND1T+hlanggalB/m4PrYfrLxlx8oP9pB5KmpsuNMTwjflcHh

6/zPSmuk3SH8A0k0hx5/iVDPcIPKpzs1zn5QlYayj+Q7vB5XdWBPQww+SyH

Sz7/V39UgcnnOKy5dMYzboMHVD7fQf/LBCebq14Q/oMCh1UXEq1azvlC+ApF

DhtsnqqEbYC6d0GJQx/z+mm/i8Ilg/IQKh11sx8s6ZsdB1dc41C/alHhWIwVq

Xr2DZt07Rp+SbAj/QqPDEja9V3yOhRB+QbvDc+WWRSYrKyD8jAkOyqGnFF9Y

NkH4ElMdQqY7XYus6nQ4JK4W/PT4TAe5nfVlii19DgDvq3Zv

"}], {}, {}, {}, {}.

{RGBColor[0.368417, 0.506779, 0.709798], AbsoluteThickness[1.6], Opacity[1.], LineBox[CompressedData["

1:e]wUV3dYjv8Xbu/d2x7ae+/h/bynnfbe2nvvvYRKiSQNkoSWhAoNPQoNSWih

QpK2KH1bKr9+fz3XfZ113+e6nnPOR9A7wsaPhIliIlyKiOj/3+N/PqxHMRIR

fjPNjK+JfSLXiz8erMZ/JhBPt4z6qxdAxBfTGP8T4KD5+ut+vA8yPGdM1zn

3C]c+8fi9nEpB97Oadqdz8gUJ/8o]lUfRbym/sfsAaTwCuazvSHRafhfnS0

+jd0Ctjdnr2h8ugUjCrxYU391OCTIVSqQZ4J2xv9+qnx9]C4oTH8Zj8VCpzb

f9wuYg]ycr+yGs1kuNH0UE8bzAL5]gohs+0J8JDLNzRaBwfV2zRWbAlx8CKp

Xf4T]zvUb3wgiQy]gffPDH8lvzkgW0SB9eGlKFjQ9H1c088FjEV7CXKDEbBb

3p5Ef4MH0hj87tc9DwXaPQZ8bDwfVA7Kl9CTBwOviy/RlPkxuNu93myaFwAc

n6e/VRUJgM0psusUZn4gUjCjZ5cuCLvHEsXT9H1AEq90hzJYCP9p/7FhHuB

0s9pik57Ycgi5]40zvMA7es5geE6IsAXdktmP9cN9M2VBgVlRQFul6R8fucM

5gfT0uOcYsB+ZicE5+oIDvdyCnLjxIHx22iutaA9eJxU+qX9WxzqUgcYP/LZ  
QiD9Z6tfUxJw3rzBN83UGqK6cpqr+yWh1vrVPSITS0gOU8I5tEjB6en28m5L  
MzjN9zm0+oY0iC7b3GW7fgLOv8n58DRPBiq7pIKQjBFcSVPSjIyXBf3NGL7f  
W/pQKfv5qrC3HMTHgkTmti7UfM7ZnzCXh3sBjiPDEjrw0ZBLvpdXASSmrV77  
0xFgunLta2WRAlRbNBlvsx+Hma0XhYlUiqC8yFLQFqQJPyzKdWzSFQE6kjRe  
HqjBck34hvSmIgS23NT9PqQCa4d6t8iDIYBbd00/4b0SbDhw2X39qgT733gM  
fCkUYbtpjazdXhli69nZBYblYj/i5aOi18pAitlOdOuLNBB5lPuH6qhA6p1R  
1W41SSB7Es5h+EQF9MuP36t5KwbUjPoDx2RV4Q8o4WRviQBDAffsbrUqRFNH  
ULfffQKWZ2uSo5xq4ER4egLNCQA7x8vJxgtq0Gq43u1cyA88EeX52WTqgN35  
bNdVwwMC/eHHPZPVQa2lwV2WjAtEjun/1PytDqNWRCqLN9lBIOGrktVfA06a  
R04MJOFa9u2axc8pDejfcfppkM0CSulv//VZawJ7hPhj9+dMoJZR/qCqXxMo  
rEVG6WwZQOtDuFcyXguqqcKnDSNogSCvz2LXogXvSMaHSUaoQD+H64WspDaU  
5zQ0nl6lA00vazGUN7Rh0196/rEVGZipvxT5hjsOfQ86aAS8SMD6Yvl4R95x  
OMd28LyniggcFsKzi4nw8F47v12T/ZDgQtBXD4/Hg/NZj5e6Gn8JcjlSIYpb  
eKhxeNngHLJDIHnLRP5fHAJtD7Y9hcX/CBPs2yFt/yHg79CJUq39Q7jr/nkk  
JY4Ar5bTZUpvrhMya15oEv4jgM8IuUpk9S+C1Lad1SktAB3RKheC1yoBxzNA  
6pMMwNK16/EqbolwiLSf6HcADNDMJ2l+mCcsejcFi+0BrIss3r6dNkcYyRbk  
p9LSAce8+8H/ec0SnjYUv19K0oECQdboN2kzhNphyrOv23WA4eMrtfmSz4Si  
jWSNe7s6YB0bl1iUP0lIZV9buaCpC4ui6yGR7z4Q/LW8bkQm6cLWWdIutZPj  
BCv3MRubdl3gudRzMUdqIKCVZUShsqsLtfIHRV2K7wkiNR3tbJp6EEczrIF9  
GiYwDMqGbSfqAYOGNUHt3mvC7s8qgU9teiDJGP3MYGyAMMeMG+vY0QOuFxaF  
VoZ9hGHVnJwKDX0IYi7qq/37gtDmvKeVnqgPHxdt3jn+7CFUp4WtebTpA8eV  
w11ptm7C+ZszN3V29OEVbc0ppamnhPheW3thDQOQvxRQLfm9neC51EdFnmgA

9AJOsic1nxBM6bWezj8xgL+yx1XujbcS1BTvRQxsG4C1uqX9+oNmgoC9gHCD  
uiHEfiX5WPvyAYEm6fJEfoIhcLqQP6NgbyJsVIDkhT0xBKG0vt1bBw2EL91J  
eMttQ3A8Xfy2S62OMDC3+ltB3QhsHmFk5O13CM1UnrdZEoxAWYsq5WvqLcj1  
mVHHzcdG4GzS0nQ95SYh18qQdmLLCGZfSt8wc79BiI5tx56oGUOQ9I41v0gF  
wa1MJro83hh0Pl3u/IPKCYZPb4imPDaGgdXRfdKaEoLCDMsnty1jeGa+Nn7G  
upjATZZ9HqmdgAv0ZImuWkUEMoldgkD8CbAfJKydcCkk/DIN/UP8+ATMe5+m  
lnAsIExGfK35/t8JyCruygu2ySO8vGzj0qtqAsRSzL8Fr+cQmp700tfGmUDq  
1w5dVfmzhLlpjZ7cRyYQfsHoNoH4NCHr393Y4P9MwN/feLSF7hQhVPiYhJmq  
KfgbvCCxLE0nOBgVTcnGmULiBALvWVQKQSeE/CLjI1MgkdNWe1OZSJC5mKi7  
vmkKc0QXmRzY4wnsLSv/jaiYgRcNnrjqXQyB6IN7fWusGVBvtdG190URLvfe  
u5W0moFR98QDrh8RhDF+A6bETTMwHnNJoLweSsB02144q5jDxot2XPjdIEKd  
v3SCdqw5UNEpZVtRBhCK8iql+FrNoT22yXi0zpeQ2sT85fCPOXwVXKpsyPUM  
+I+cuTSjbAE1c4oMF6o8CVZb2/rPYyAo2oRUhk/SdDmDtm51WIBhw3k1mde  
uBBezsb9PvHLAv6jGQ3+T86JYHY3c/GXlCXopE+Ri07aE8Zj8meu+FvCZGnB  
5hhmS3A/XvJRu9oSTNeaBM5+sCYskN189+2zJYxTlrxVPmZFaJu3n3tBZwXH  
XQreXRUyJ+ybuM6USFlBQqMq+zVbE4Lofc/pIGMrmH/1NmD8lREhm9X/43F/  
K7B6/118IN2AMJgQMsZ4xgq6n+qWQ6gegWE68t3sTSso7zS+uHheh2AD8UOP  
nlmBDWm30+UnBELJ7ZSB3M9WcOdtJEVP3XHCFNWpl65/reC5hcaLsz80CQJh  
2d1yXNZwJiBy2dVfneD7Pv8psbo1BJTO+c6lqBLqVC+1jdlZQ67chh4TjzLh  
Z3lJa220NSy5xsmd1lMkKB1ee5BcaA0zrtmEv0ryhHjvm43mTdbgJrqu9VtB  
htDRV1MnMGQN0d9mqDSTJAmHUo23/yxZw2ac+V4BmThB9+LDqj5KG6A9Q7EU  
OyRCyPnzukJc1AZyKNGg8mshwpDj07JQPRvYn7iQ7vhXgMD0tKeY4GUD7vKa  
FtkP+Al2Av2FLBk2oInCGDk6eQhlZ4bO/6iwgd2ngvrFDfyE6cX3uW0dNqAd

GJiid5udIGj+4Uz+RxtgEKzvyYzDEfwfTme6b9kAZXdxTE4qC6GBbTZVEWcL  
BrFvjvu0MhHWkhYSyZRsIU77hI+LAgNB+ctq7AdLWxgKH XtHMKIIOpuRDaE  
2YJCpBqNfA0V4WnNdmhavi2kM08E/TKgIBDRHgRa1dsCOw8DqZgAGUE/gSRP  
uN8WmrWo32TJkxByRym9tuZsoeaZqGVPOBHhjTr9yVckdpBec5bFoPkAsVSw  
OFcl2MHHykqXuPE95EDEaR+B7KCaA5/sSNhBV335rHXD7IDq0mnd8cX/0JcB  
IXO2ZDvIZHtFLTX0BwnJSpXYLLUDv26r903f11HAJVmDzkdHON1whV3qN2r8  
T0nnwqgduE+v8lqq/US/nTXwXut2UKqXgt3xW0YqGF5ThdEeBgVsQgQnF1CS  
kJ4qpaw9xP26AP+d/4GwbGPFsRN7eDt9XKIr8TsiWTGXvRdoD8hRYlO87Bsy  
tLSVzMy2ByvmxMXS119RXouTqO1te3jfmPqW0TGNhjncBcWe20NQY/JE0X+f  
EGuqD9/uV3vYd2zsNo37gJxmArmGDuxhQq7WLkRpHFXoh7Pd4HEAtbt0r6LF  
R9FMXQxztKYDbKqTBPBZvkci9En0Bo404BT92FDG+C0KjEqn5oxzgfSawn6c  
/hC6N36afKXIAXye3NHtzHuFNjTPEWMPHOCQJXy+G9eP1CovHBQ004CUQIXv  
2cmX6G71hsrwigOs0Xf63Z15jgRqHUJpqR2BVxV3VZ6jB5Xc7bhlLOYIzNax  
76/9wRDtA/6ps3q08FQjnTSS8inKbM1ieeHpCGITp35me7Wjrbb5E0TpvjDE  
Q46JY/8xCukyOYW/5gg726e0ubxvRTM9TW3JbY5wJggnGjnVjOz7WH4/GXeE  
Lye7KQxxD9HgYLz4fxuOMGLHVt/wqwnB20l3JSYnKExN6P5D1ogejaKSCFkn  
yGfW2Ob3qkdSH6vfNJo4AXe7hn/kfg2qmQYgXw5wggOsguzSu9ul7VvwcfGz  
TmD2UUBH7FM1yvsxHONb7QR9JujcU8w30b8lpbs3nzmB73WW6TOriSh2rWT2  
y7QTRC7/VA4iqUDLG3tcvHtOYCW/1H70vRx5bLtb03M4w1pAbCr53xI09vd5  
bonKEb7479zf98XIhEi8e9TaGTQu8hVf/VyEnpHlbnNFOMPWpqTsFuclpEL9  
S87ivDMc2l1fDPh3AdXT2/rn1zsDTZyi9hb3ecTP8uT6QJ8zxHpIldfxIOYeK  
2XnGyeec4TYm0tnPIYOoeTL09IhdoPf65MvS9TMo/dh3vUx+Fyg61RP94TAL  
bQobpXRpu8Dvh0m0TtqnUJDE3eY9JxeY+Wl4d1wnA32RYVxWj3eBFQVM/rIN

KrJVjBGMu+wCkq7X86mqk9CA6gen5gcuMDc0UPFPKQEhLe3CX29cQPicadPi  
v1jUgm70y6y4AOWkt34sSQyS0CP9F0TICjHUZt9tVKJQpVGAWq2oK8glHCa3  
8EcgvrPXyX06riBrd5flt0goyrWSvyPo6QrHdxSIahKC0IHd5Wn3NFfw7MKp  
yjAGoGjnbdaKq65w42Cq+tN3X7R40tX00xNX+MlCp02+5o10ej/LYh93hf05  
T5yIqBca8RfusN1wBRUprSfpZB7IOCRnvZDRDeRPC1ltUbuhrogViWEZN+AZ  
T/7T5OKMlGItPWIN3ODzMb2bdVsOqDaxpdQ4wA3ifVKcv3+2Q7xpHG/PnnGD  
R5q7nTUktqjoVArFi5tucHF8Gl9vaY0os7/iiZ65gaWL+j2nc5YoNU8vDj/t  
Bl8yQ+g8X5ihjQu1jcm7bvCY36E80NwEBVymnXvCfhJEU4wCCOLGaLo0guc/  
5ZMgP/NK8oe6IbKuGLVRsj4J3u18d/bD9FFflXpeRPhJeEqh9+nsK110/M61  
nsb8k6A4oNmXaaKDhtb/21mqOwktf0k/Tn4jIEMHwXxvpPAYtB02yUZjyqa  
+wN8v58EgBS06wL+2oj5ifSNm0TuoPGEk0LvuibK7rw48YXPHczuBQbwsGqg  
X38TUkrw7jDjQPoJu6GGnI57ClicdIeq1MvllO6qSKpLIbirwh200d+ZVJEr  
o8sHnlxxT90B42T9EjytiPbxxK0y0+4w1feQzOu6AvJPX3Ka++sOT9i7jnVE  
yqG32PuDazwe4FZZejNaSxpp/GuvttX2AN0tR8WqBHFUtag2onX1gLVf3lHb  
lMKINjNv9XmyBzR3aFG5lPCg207oS8lXPQDBA/mJ0wzoM5GrmlKHBxD5t2dj  
G2N4Qx29qaVPHuDpde561zANRvftXFEjnSdYqaYUZ94Sw4D40DeX1xOGbh/L  
sTWSx+IEo9V9ZTyh2MiUeVdZBfvi5TLNY+YJ6TcETZmOIYw1a7hp29UTxuUW  
vnd162DG1bqnRkM84S4lGd9gmT72cFZKLD//yJ9YuJC61wSbJ7mx43/NE4Ap  
vliBzwLjFmZ9rXv3KL6d6l3feyvMUi/nOn+nJ6S+LxtWv2eDnfH5G7E36Hl0  
D2kHJ+baYW2nI3QnJj1B8qninbV++znre+45mVPWHqSxPmEwQETEum4ULDn  
CefpCswpGewxh7nX7UE0XpCxrs8zPWaD5ZHBeQNuLxgLw7eR2lphz0Ra3QWl  
vEDOhtlqu88U29SXUDzQ9ILQK2mVq41GmIRfBemne17AxFJ+zj5aHzt5lmmi  
1dkLlk61TqU26GBFd87UFQZ5AZWVLD/vG4T19e4khyZ5QWb6p/nmCG3s749Q

c+NzXlBnUdcv/EUDU6D4dkyk3AuUlrJ+mdxUw3zF7Df+1XnB4JxGEC5dBRv2  
x5c+GfAC2dHm6jKqBYwk52HQ5Y9eINSIHA4WpDH1WtHjEYte8P3W6+H2f+JY  
aH85g+mOF3wroLt/6CSCVS3Qfx0j8gb7YOLt138EsDHKrBYSTm+IMzH5ca2V  
B6OW2Dr7RdwBqmWV2sQU2DFkHOzUoe4NGtyX7JALMxYd+EWqxMgb5gSGY3v9  
aLDaXJuDKEdvuHgscFQ8lhSbrut7ax7gDYtEAgzUEX+7mF5pVUsmeEOuNmWt  
nvZ6l8FSUyx5jjsnLJMjPCd6UqmFjb6VuINROm+nra7xV1NkqVcXTXekKF/  
7/Jw+if89x00q2WPj/yZyZV+vV7AcwZnYLF93vC0ozpuTul33izvT6HVhDfA  
yOx+iNMf/KmGAB+Z+SN+XS+mpNv+wz8enFKl2vIGuxDDZz352/jlZUuqOXIf  
SBwIsXvNvos33FxaeYDzgWnl/dL6U3v46oPTb90EfUDhbk6E0rF9/CEff4uJ  
kg8Edk9Luokd4l2Z2ko4dI78SX7kMQQqoTYum+Q5Sx9IpWDseSRGgnDCqycf  
uvvAZsvol8owMhQpk62THuYDDnZXaQ0cKdGQqoCoaaoPVckMhgv/o0EShA4q  
znwfeHtpUP5RjiM6Y2y3OlfuA5GexJ0dKSxoxnrt7c06o/qkYa0Rz9gQ3jW3  
Jf2JD5ROTHGol3Md3XNCpaZ9PnAinThpmJ0fbYU9TeYc94Hz1Zd6mssFkU2C  
g/uP7z6Qu99E991dBDVl/tZp3vABlrJd0yxXcUSTlyeaQewLCqXnX2kUSSH/  
yyLUZky+4Fac/bajXA49r8BWOY/5wuwsZ3htAI6VuP07oesL+xVF1p0TSih  
1PsbLc3HfSF+Ki218I8K+th2vjTD1BesyD+S4FTUUEHrbneulF9gXaa7lyp6  
HK2OuejOJ/iC1mkyHppPCBl/2RRtyfYFFb/3WkOTgIjXJX6a3faFVxezdc9s  
6yH3vefvuFp8YZX8r86JWgPUQXqydb7HF9QefiVWDzdC0eyXUjK/+sKXs+z0  
qvqmaPiYtlf5mi9c8aj/taRsjqQke3W5D3zB+xhlj2qZBcpW8hBboPUD3YKF  
x1uKlui79i51K7cfKBy7e1bulQUCg8s/MyX9gNe0+dsXUXNUYSH73lzDD5aN  
bvqfumCCdhz7W7mN/CBB7cLFeswI2XI5I5S3Y+4EFEXE0/W999CD4b0qrrx8k  
694wCXPVRXSxVzxOxfhBYWLKCWINQIFp8noWWX7w0VH4kc34cdSb/UqM55If  
9PqRXZdu1URChT40izf84LSHvE3QMXWUXn7ws7XJD3LPaU4vSKqiyerS96e6



/CDU4nz3+WllpNao+MhiyA84TGhOun1XQkWPXpfxTPmB7Jlq8k4mJbSG+aUu  
LvlBtcWpgMfGiqj2fbleFqU/8I5xnWH4JYflppTFLdn94eZj9c/3KGSR59wb  
Gl5Rf2hlorJzl5FGnNvEI490/UFQuvvqxk1xFEtU8SjL2h8yVmqDJ9ZF0Ttq  
tXJLT38westQKOsmgmRY36XyRviD38V/hYa/hdA53mDPpTR/ECotF5dpEkTz  
omT6j8/7Q9lSts2XKwJIV75S/PQ1f6in1BbrsDiGKjU0aK0a/IFtKNCN9yUf  
2tMZWeNt94eOR7crmMJ4kVWQHXLX4K38Y6NBSMBXhQTFWfecKKn/zBNDhsEFFx  
o/0n83jtjX/QfXk8ZIWTC9l+1XUy2PWH6oE6FmsHTtRacSPakjoA7qtKf5nv  
4UBEcN/PO3MFwJ5o6+97ThzIwd6x1kcyAHqTh2+YMXOgxtSWnjDNAFhVdp11  
nGVHJLcZpxNOBICptfp93+fsyO11yNYp5wB4OWJwQFnHjpo2+pnOBwWAdJvf  
i4lz7licW0S6JcAPIkTdvzc2ZGbtqZB1bkA0G5yvmzCy46aA6c9GsoD4Cb2  
M4+rgw1RFWokt9YHQLAS60SAHBtyf1JcJLUHQDR1Q8hgBA61fvndNPAqAK7o  
FelOxLliGgrzVyOfAqB55q61gAoL8pSt/z69FAC3ZyYu4m8zoSd25IfzuwFg  
kj2/cDaBHjGkenGuUweCFdPzpbxZKuR7q0vpL1cgBHsQsbbGk6KOQS5zcqlA  
AE1VL2mLPTzTRlwAo1YgeFoWaHdcXMT7c42c4jIjHmww888Rjwa6noJchbBL  
IFRZG3SFz/zpYgnMeywbHAIjC1f35XCkWNDF+XfqyYGw6DQCHUT0WPdj3RWD  
vCM8IzfY8JUVY/9SSW529cj/j8QDrjELey7jqOXZEQgWX6OIy62FMU67Frv  
wUAwrnRbpVgRw8JTGcNiJwNhwjrefeylFPayOuRc+nIgoEiTRXt+k8N4Bvtv  
5e4FglLTHYGzNxWx6HVhrIgmCBjyJWM4t5SxAc7MjxXcQfBcnx4rj1DDYgM0  
6B9qBcHww+xlkQltbPBCsXinSRBklmRun09FmMDj3zq9LkFAlNqcSPYCsPjP  
Zm5vg4PAX7b8k9tdHewNWX38p+QgMI5g1dpe08FEZMgvfc8LgvrL5NKvvXSw  
ZFuvuz+vBkHTOa3G108J2Lvkrt7thiBg2ovqTejRxsSquWalO4Ngq9Dtw85F  
dSz1Vdwe7esg+PRCzyomUxkb+f0exz4VBIFMs8c5JuQxCU45eYGVIAgir3Q4  
Sy2FZRdyTkj9DYLmwaSpHnJRbMj/3keFNhJyKFNvIT4IYDIXdNMRTzCY0GjN

/CDwYFmPKsuMpYMh6HbrWyDjwD507zXbaAdD5Q/7W398cZgcmeMbN9NgYOIZ  
ctj0YMHOSLcs+LsGg9M/1nmGK0yYYnIIB0pKMBhSVl4zT6TCcm/2q53NDwb5  
D/LRStGk2JcBYeuL14JhMSRbcnV7vyuPY/rsrc5gGErt2Pbfn+3avbDQ5f06  
+Gjf059XFkzvCqT485/gVDBkjxu+Ijf6hp9IO5T9thwMRTmr0Zyhv/EG/1H7  
V+0FQ8iIZcIN7W18ayhbpQdNCJjyvVnnYDnAC80JTPBzh8C2stJ69zYRuuQq  
w/BFMgQonERbHu2RIKJRdcPrmiEQo3RupekZGQo30Ut30xEC6QzhFAYnKNDn  
HovHPM4h4LQ6SppYsonMNF3WJgNDYOF1x3ejBirU8cBP7GpiCNzRDg+KP0WN  
JCWi3J1zQ2BQjZ6liI8Gld1lLeEsC4EeX3+bU7k0iIld/hDbQicKJ190fWG  
BsVduExR+iQEIKuWSTV3adAc+Q3k0B8CutYL9QrstMgmrSGe7UMIHE/VsXZR  
oEU9m4+axuZDYGXDq9jclhYphPbMX94KAfach/TVebSo8vsQvy1FKCTTIDv+  
+kaL6F0/OrCwh8KaxSm6N750KHXk+4X3oqGgIDbaN8JPj5ZP/OorVA2FXa9t  
gTleBuTcs3doaRAKcmM0j1r9GdGABoU6o30oGlrLMs6cZUJqD5gjhN1DwdFa  
9a9EPj06I85XWxAbCrbWOytEr1gQ7obEV7MzoUBX2NCkbIBDWewqHHTFoWAc  
n8IUQM601gsllq9vhYJIWNOXj4ycyJPcNCev5cieQpFxNogbDac6PDvxIhSG  
3ja+oKLIQ/hNr22q0VAIVb2pZrBxDDWGhMkPzIZCEa3qisYlQcT9PTEgZyMU  
fv/qe0NpJYzOuZy5YUGSBtVpJ3q81EXRzvuLH8hZwoB3OeOFyglxNN5dY3RG  
MQwKVdlWDv5II32N5gw9nTD4mLFH+65QDjXf73pCYh0G2Qsr8qX7CkhQ/NWv  
Hs8wOK/i15SsqIQKK8fET0WGwcN2Pn2WYWV0yDbjcTTs4HaQq3NttioKK1gp  
/XcxDHy//ltVcFNHJqkkVOn3w4AqhzT/wEsbtF+hB/yzMKhaE70sV4xHEiFc  
ifvDYCCSo8qmsEBAJbMiDzq/hMGp/6hz92V1ELmLwmLyWhhg++2195N0Uex7  
bQGtwzD4raPRPXJLD80aGznt0odDxBTfWE+QPrLutils4wuHhux+u7oGfdSt  
7j6QIBsOC0RFLQ8N9JHc/SAidXw4Kpmd9qPm1kPXxeI0tszCYTaqjUXKVwfr  
VWZGPnILB8/YqM07HASUzHa+LjY0HCpmFakOvLXR0vnSGeXUcJArnlKwWFFH

TmS3OP/kh0PWrr1J0YV0F9aU0WTVfC4c3f6MWBOOUkOqf9tyou+Ggvb0xzGWq  
gIZsV94LdhzxTWKrrtKWRd6tvDwjA+FAOmsUyX1LCu3gLHyZPoTDzDPHVlKf  
EuhCXMY9pflwUDy41//xtzgSmXiwNbsZDjYsnT1jpuKoU22WcJk0Ar56P899  
PiyGbEpZz+mxREDSvIHhNycxtLitP/JHIAK6i/uFI1+JonSneJ7b8hEQ/7rS  
24RUF0Haa33tUAS0bcubZYuLIJ1kmu1W1whg8ov2y/YSQh8ntcEvOAJEa4Sv  
mCQIonDtsHNsSRFQopeneDxXAJFVVI705kSAOb0n7Z7CMXR1/y1PfeKEToac  
reVN5kMKJ4n9x05EQB1lnXT3Og/q61JqmmiJgMfn+0vnSrmRG7/vdvbzCCDn  
mFs5F8qF/qRfAfX3EXC25kD8QQQnyvvad27hawR4V26+iL3KgQRgZ6R0LQLo  
DZR5Jj+zo8dVkrzGBxFQry1y1kWTHdVk3lPaJ48E1ax+4q1GNrSuYOhoRx8J  
Dzn5LjVqsKHj376kNOliAulx2qVP41DupYQqMt5IIGbvsLhUhkOjOkY9bsKR  
YPkvQiApGlf4N+qWWqUioblyKzbBAoeCq3UY6JUi4Wkjzc4bwKFHNpNKfpqR  
QDYbaI/hcYiINMaxCyKBZ/uNRp40Dpm20KayGUfC5dtb5jHGOFtic7sqzDIS  
SG7dgM6jfN9Y8b29DpHwt+Hs01tWOCTzcnYjzz0SmOP8wsJNcCghNpwh3i8S  
PrX/PXTTwKHnIpTKw6GRMK9IzveQHycYxm84isVGwosrKKbxGytyPquRmp5y  
FF/pe6/wCiu6rfq+aiIrEjxIVRjuyLGi3z+CeuXyIkEmPSiVu54FaZeQLGdf  
igSF/p5APWIWlG14jeFrWSSslewuCozo/dbysrqVZGwe+fNnTvaTli3dsjx  
Ym0kDDv/d+2lDAMKcPRLXWg60jeQzFmbQYuaKQ+rCI8jgeq55AQhjAodPCnp  
Le2KhN/mYu+pScmRcaD88q+XkcC5zinEj4hRMecAg/FQJHgyMTCuKe3hvw54  
KleNRgLT95UMPoF1vFTSruPOZCQQWThZ7s9P4+Mli1KtZo+wjEFPr/VQF13e  
i16i9UiYmX2UIjT6t8tRy23ZaScSdpJkn7I9JsOqlzcZHv6LhEZi5fU0cjrs  
59UCZWrKKGhjKx4OWGPGNEzFnLwYooDizQ7kCrBjp/9iqe1sUSC2c0bh1jVu  
bPiu401mvijIXvwwTdv7GOZHd265RzoKGu93TW7/FMGaXmc1tClHwZ8XK5c7  
qCWwrbzU4PvaUVC5cevpvKM0hkzipWr0omAk57kM+6Qclk0duVxhGgV1C8zu

68aK2PBAUMNI2yjAxJRCn8ooY+y5PsF5rIFAnot7nnhTBXM3Oil1yicKmim2  
x7KCVLEaCsflhJAocLNWznexVcXWeq0awmOi4DK780sMWRVM7axJsF9KFFQF  
DPxi2FLE0vX1pdxOR8EKE+eXH2/ksH5StGyTHwWD9ndnTM5KYkww1BtOXI6C  
qC0DcpUYEcwpSzEYrkXB05K+Uab1Y1iVjrSU+q0o2ORgPmdZzIktEokuy96N  
ggvvTClAmgVT6OZvEGmJAiXlr4OZ16mxxAzOYJ70KCB67l5v7kiMdSMWKZYZ  
UXDfZodKrH07i+qQdpnq9RG/w2Sf/J/rXVZd5A3/RqJgbc2D1FVytass9V/Q  
1mQUNFgt7X/Xmu+a0d6V/DkbBSVb0kRDqjNdkn83lr4vR4FuwoKwI8x3XdEd  
q/WTG1Ewc1tQ35jnIb4jaT7o/V4UrH4aB6/7n/Am05+WMJpoeKmbXz4Wv44v  
ejJa/4glGiYqrdv0xLbXk/Fvghq5o+Eyy+LFZ1/28UJq/ZK3hKKhFulU69MS  
o+D/upfKpajB+aeiKLULKWpu7agvVIqGdVyf1T1XcrQX0xqUoxUNC48ORBSZ  
KJGucpNkum40RAcGjzAlUqH8jdqlWJNoYHSjL+O6S43GHt6sD7GJBvOMtpq0  
xzSIN+pakLdLNDcNhBwev0qLfbWuSDp7R00anfgNRwc61Pjrwpl8BE/ipXc  
N8t0aLMpt94wOhqUPKaOMTjRo+PhWUH45GigaHqN/1BNj87lPkqqZEXDbtC2  
lNAIPRpajVuSyosG03jaoJVVeorRjKgXLloGzcetSfj79MgtJCil82o0UNJX  
fVkmYkC3pXwkGaujYeNkMhc3FQP6ueS2RN4QDYTzv++2szMgtXqH+v2H0SCV  
cp+jT5kBpQdaBf1pj4ZNet8v2v4MqE/cRHK5JxqmxDtPcTxiQAwLeksZr6JB  
oNHrtL04I3Kowdd/eB8NpOlkfhsVGFglN3rQ8Kdo8AYJu/+MmdC8iKjk77do  
eGeaFMA3xITk5qSWOpeiYW3E9N6vcGYUf0ukvkn9GpyM4v2Xj95zmDd/UP1u  
NDRzvx3NF2RFFEKcklXEMVCgyajZHM1Ly2/MSyXUMfDptt9wZyobKquirS9g  
joE/yOqz4QY7mvEgDzrDFQO+WpNPnSo4kcSxfIpgjHAS0dbwJrKjSK/7CxG  
SR7luzxa2HaZF5kVnVX8phADAoQfGvRd/EjCkCXZSiPmaB5kvcdfONqHe5XP  
nxFiwH/sDmY+KYhm7knTyhvFAMnighaJvjB66tVmW2kRA+9e2vHVDomgMjaD  
CnqHGGAx2DmeGyeGrNLcZVd9Y4ChnKVQTIYKySiuxLmGxoCT4M2ofCSDqH4k

YIMxMaD2+MqqbZwcmisjo9RKiYFtzsOVocAF1G12ybl+60iPeuRZ6UZFVEHE  
X8aZFwPZwuJNxaTKKLG1YSbnUgxDtZZm0aqIAXel1H+VTFQcCD8R0080qJ7  
Z9UxXhsD8z6SVp3HNdHi6c8kBvdjoE6TmUWYXBU9VA82bX0cA5shXots88dR  
1crWZWEsBn4v3MA0ZxBKvXF6uqg3BsabKV0lEwE52TKJkryJgdvep8zuiu+kg  
FcrrYVFjR3ofsoZ939NBTJ2Sj2emYoC14UTWF6SLVsMfH1p+j4FK5ybrdpwu  
GhDSM3q2HA01r4eqzgfqoNsTby/KbcSAj/C0TJoyoMw8t4/Xd2PA5KtDaUER  
HrmhJQF64lhYMGnrFvymhTQ24oJSqWKBg+9uEleVOsLVkDSvMMaCw+e3D53f  
qqDfzhf3XDhiQZBHW4zHXAkN0fPqDfLHwgO16qcaMgqorqcuX1MsFn50162o  
FcmgM3GqY3WysUDxLLlFxESeUo+5+VUjYWy50bH5zvE0PHPFn45x2PhYsn1  
9b4JecR5aerell4sfqijth0C6NN/cAtP9NY+JgkY9dhLoze7WycZtYwBHJ  
f8nkEEaNjady9F1iweOR5YkplmGU68nwrsXrij+tHe27n0LIF3eNUzgoFnqK  
SK76PRdCMCDuVRQZCxIVcwJEPkKIN7W1njgxFIQoEmkKvwqiHXmdjciMWNiU  
TV7ZNBdEY9/faM1kx0IQ68oLuSYB9KDU5bTlhVgofjx4GU8kgM6bLrzGrS TC  
qPzSY91cfhT4LwYndz0WKL5MT8Tu8iL9FqKT12/HQrTZosOvMzxIIKDgDl1j  
LNA8SRZ5r8qN9rm511JaYsGHtjATceFPg7XqK10xEKyokrdICUnas1SznB5  
HgtWOq7usxlcqFctu//Vq1hQJtHIDwphR6HLZkya72PBontE4+AlGzKu/ORU  
9zEWLjto4llU2ZCIjF9Njply2IkOLavrPLq3KP4sZS/EQtZUiEm3Ew5Nt2co  
ba0d9b/su78zHQ61hdGl+G0d9cs18avMBCsqFix/MXYQC44fmVIVWllRxLgo  
nT55HBizX5/5dIsVOSnmfS+gi4OXnRWfw6tZERSsdXxgjYPhkW6pVPdYkcSS  
TZEgTxz0jll+Vu9hRUwGT4JChOlgl0dX4MI0K9qp4tF5JBkHbRL7fhX7rGhm  
P4Pzn0Ic/HSsGP7Dj0MDTn0/jDXiYKQ1NFn06D580GrcX0SIA5qvj88998Sh  
MqZ7ldOGcaAV/5LXLQWHMkOZ48Us4oCK+6vt6Qs4FDgQZx5pHwdcwVaWr0px  
yFpkUqTDLQ6YKbzlXxjkFYm2if1jYOigpO4rSwcEpquHjUPiQOjqvP8/zxw

iEaD8m5p9FH9zxrhIZI4tHE5JOtbUhxM/bgrPHTEf/LXW2fpU3FA7iTv0Zza  
ip6bqijG5cbB1iidzv1tFtRQW0b17GlcGEoYPwVXFnSZ90ArVWkc7Bx/ZVZw  
hxmleng9samMA7kYeu+qcSbk29l7oeJOHNSRHU/3HmVEZhxS/vONcaCgR2Wx  
9oweqcRcwCu0xkEuU1G7TRgt4n27gUvujAOrqRXDww9UiEzacfXF8zhgYpFI  
9dgnR6vZnS/oB+MgUNj569wECRqfPXbN8X0cvNsT+rnb4jH0Jnomx/jQIC/  
/6IMbONrri6eWPl61D/+HL80/jV8vM3DnfS10Mi8rXnPxu51l3sT27uB/47q  
nzz33uH0SpchTXItY0Ec3A7YGkz8stMl5/8l3Y0sHqh6aNtofEkwjue6DjW0  
8eB4iVhs5DkVRsRfK/ubJR7cVU0kRS4yYotJtORa3PHwonKJ74Q/K9amONby  
RiLeTLzktM/Y8WBVBRR5HArxoBAb8OZ75TEsd6nC20s9Hjr6JuhLqYUwp5t+  
zP8ZxMP5UPOPau/FsF2m7XBen3glKYtXGy5QwGZDXQ39g+OhRH7e4/wfRWxw  
4Bnfg6ij+vXZBaU+ytjVzNwhvcx46BP9ZJ3prYZp/eaSCrkeDyu+xylop45j  
Qmbpxl9ux4OV6t2PVUUIo6mb/Xh4Nx6a7ERUZKUAm/K4m1PUEQ8Fcv30LH91  
sJedjB7TPfGQRdG5hVvRxRo5YtXEXsWDJ4v/qYtf9LDiml/0ke/i4ekS3VWr  
bn0s9e3xH+0f4oHbyzRs65wB5qVF4lT9NR5eUq12bZwwxAzv9A/mLrZxy1xo  
zV0zxGSYCvAxv+lhdp12QCvRCGN0sXnguh0P61niYfkLRtjWDw5h/X/xCOuk  
FffBcWNs2urzFRnKBGisT9VnSTLGejqrqdgYEyD4oo23eYUxViMwMHLAngAC  
6k5LCrXGWP4l2bUf/AnA/MrVknDVGlvc3/AcFkuA02HSNH/jjDH7gLBx3IJ  
0Gl25eK8ljGmNZJmeEMtAQ4vBNifWTLCjuH12nNQAhS5Rb53yDLCyOqoZCIN  
E+Dp57SkGXljbJlluNLJ4oiPlvuLW7GG2Nu0y8w6DgkwdO2riPBbA6x10emM  
pHsC2Ei+Y/3GZoBdteXfZvZPAH/aQ3LPE/pYBvY9aC8sAc4Eq0cJBethvpL1  
07NxCTAebvK6IVEXO1Ecbvk6LQGqgDwwJU4Hk/un/LzlbAJIUakJc3gBtjOG  
1Z65kgA8yr6JUfTHsc+EM9xh1xNgLkDZMue0Jva84USB/Z0EsBv00Gc4pYbV  
sTESoXsJsEqS6EglqIIVZI5Fiz1KgGZvxwP7UkUseqX8B0NXAnw5PrikWiCH

OT14OG2/TACWylxFcJLC8D0ir78OHfH3pfXxyBPDhGSW8QNjCXCv726vML8w  
Rll6/8GD6QQgqrqWKSaggK0SxwmXzyXAxFlx13NhIqFbJqdUE6BXqU+Ca  
ZMOefPhHFbyZAPUsgXd1qpmxCt3eFJv9BNGLF/eaXqPFsu7lrWmRJQKLcrZi  
znVyLIDTykuYLhEiz8wkvteiwsxOs43R4hKBbsHu3brXdpfi2qThJk8iOBl6  
9pjV/+pid65qnxZOhNvP4qjL9L937b/wk+mVToSPf20TPqanDh2Tk75xTzkR  
Zs6v/iLmuN3VV/6buUT7yB7RKj8h9RLfSPb4TLpelgx9iCJ6ujOKvxSRsu1v  
mghWPRKbL8em8PGTEGxpmwvV0+rVkh/w7saUHxWd02EE2KaEXPsc3h48NpS  
wCcrNle/eeNIF/BiPjeeU4UkgqzBjzNyo2U8bbaD6np0IlAvWQQVaq7hf//m  
qfuUnAjLjzST+8vW8ROu37ifZyVCI5EW28/nm/jOvpqChrxEi3ruXWnbwdf  
pRhKdLkoEVQU5sb3Lx7gz1YoxqRcTQRf5s4/Kp5H7xfK7R8+1Ymwfzl8hU2E  
DKl8PvVapTkRLtT8OWBkoUGvckLjt4nwrccsN2d1aku/jrkvqnRCh+xTXQ  
9wmHnhoZF5TNJEKivNTegQU7aqLYPe3yKxFkhPx/afByIXF/64zOrUT4Qioa  
4xvOjap665N5DxNhsY1Cgvo+D+ISJYlPI0+C2yt2a1pTvKjojEvUF7ok8Dd0  
rqH/zYdo55pDCbgkyI45qXBImR+d0aMNR0JJale+u6E/+o+hg2ofH2LhJODb  
7uU7pyuA4kmeuntLJQEM3MZKLwqgX144lxeKSYA+sJ+reyWAAntC7UU0k8Bg  
F8IMfgmgbwK9VmchCTJjV13DgWQSyaf2bxREvC8ttlz3RZAo1/jjIwsj/KJ  
ZrINTAggM8Kwbp3DkX1hr2fnmgDqrRRD105J8PHHD40AAwGEDtM1g/208v98  
PaZ16xh6cvKDyuvQJDD9TCgwSedHCl3yCjKxSWAru0rirMWH6nlzpQtSksAQ  
BVzBOHiRUOqM2FpWEIRfln0Uzs6Drk1pCFnmJUE5G4t1hgo3wmlf4ntwKQlc  
GkPsKSK5UMHVJU7m8iRgB80HXP2ciGJPBxddlQSHbYyWb9U5UYbzVcbR2iM+  
/04fw3dzoJ22DRqV+0nA/VeKMcmdA0VxmIjceZwETcXltOVMHGg54RbxVlcS  
KLX6krSMsSofD3/3HXqT4IO04LfpOnY0rWa382QoCYZFfa/I5LMj+5LGP5xj  
SWBs/JyuLYkdDf9H9itpKgniL71TuRLNjозsTy5PzibBuSXhv59i2FF366Mf

2stj8FDD2rwiR1p4hi+VawngUDAT86NHHbUHOM/fbCTBJQnC0zXS9iR9Cj2  
wZ0oGa6Q9I3cr2FHt5U4Rp9RJsMBQaZC7xE74iuKGBZgTibIA7srz7vZUcl6  
/6tT7MnAJzx+V7efHTFaC/TO8iWDWrnOm0997Cj3QWK3nmgy/DSSX7jexY6I  
md533pZJhigO5YXb9ewoOULyCblKMmz++tZBdo4d/Rk+1eyvnQw17e8sR52P  
7k+5yXv9usnQ4VZ8WYybHf0oUKqXMEkG956eGNwAG3L/mXf7nHUyUESIWRZ4  
saEPZt9vLDslw/KSYfTCDxyyatS+ZuqZDKNVG5tX7XHofW1xSWNAMrykl02I  
aD76v0JWL9FHJEP9p8N3PvssqHNQvyA8PhlS3kdSrKiyIBWp67lv05JBsCHF  
dtyDGYktmWdcOp8M50e7PoWxmqlbxjXJG5eTwbvAWgo46RFn3WGC7bVksJxj  
5a6ipEU0AfdD2RqSQVJq5sS7+xQoczyQIK05GfqXIjX9jpOhLT2hq7iOZBDu  
lrf06iRGswjX+lkhk4F0TeRbkfYuvMMyWYhlORlio1kvj5uP4BVOqLQzbySD  
QuK1S6vHbnTVPPlpybyXDJkF8uEmE+NdRcWeaUw0KWC5LbBqjVvroiLlxjGx  
pECuyn+/1Mv/dKVHjTYwcqdAlb7Hm5Sd7a5gC8OPDFIp4GKWe1GSYTNPP0X  
zqCUAglP9pVuTBNjDtLt5AxaKWDM54LlFjBiQ+XRffS6KeDXcUJsl50c06WS  
UaY3ObLzbpNxFFgbfE/XtHZpMDZ31k4klpKTO5HpSedSwpcrzjm4VFLhd22  
ddqm9U4Bnuw/DO9jqDHu58wXaINT4DSLBIUWNQ1WqPBahDY6Bbxq58XSfGkw  
ihtnOmmSU0Czwck2LYsGS6VHNjRZKVCaWRvG50mDbaRsL1LnpcDhxX1H2KPG  
ApcfZFAxpcAe/tTmgDk19sUpmJ36agow/XYXveplhdn1C9+jqk6BQdpnQyU4  
SmxQ9bMeVUMK3N8aHLp5ihyD2yWTlM0pYMDDeSFl5jRR7zGIVRdmRAuzv8j3C  
PYgxmVPUVJTPU8CGVTxs5fjBV/Wv55UUGylAa/3ps+yD7S5091RVipEUCBQ5  
NR5Ev951YUh1iHwyBdYfzCoMmnzvtP+5U0+e9T/xxjuo87TruT6ul2y5RTw  
5XIUm30/hv/N4V1ItpEC+zgfEyOTebx/No842V4KXHUv1G/i+o2f3hzrliVJ  
hWVC5+Qs3ybexueCHSINKoxjd07m47fxA++NVkhYUmH6WPmTmDO7eATEWSTc  
qZDM5T7ne7iHb23q4CQRORkzsY5JPvmLl+KLvU8slQp1LD275zv+4qvyZQ2J



IVKBlz5qwAn3F8++Nz9NpJUK1SQyLY7vdvHnA6tiiHRToeP3nozdz3jae5IMz  
DZFJKkyOzddxVv6HTzRgvfnPOhXUGnfKI/o38GstQ+r/nFOhbTF63pDsF95X  
KHv40CsVzvt7Wh60LOAnCwl+h0GpUKF0v14u5Cve6t/O34OoVPB8mhxTmzWE  
7wtrLjpIOsJzhul+yve7mk1Eu/fPpYKG47f0ZM0fXfktDx/61MhSSvC5sf4  
YRcDTwWMP0wFKxHWxdjPxFihoqz//fZUaO3+16qsQ4axHJ2g53pSgchbTuBa  
IQVW7G750OdVKoRuv9Xk6KPC2ONmJvDvUwFFsrHgpmmwsvyofY5PqdDVkd9+  
MESHcVeTCG3MpILQK0sCXGbAKtouGw0tHunXs528hWPC+N+KhNX8TgWXmGZc  
90smrOrHo6LMnaP6y58npByZMaF9wzYXojTIFlyT4H7FjN1h+fhZhSoNUi7+  
ZXnJwYJJSaARMjKlgWAj/3V3YMEaCHsSSxpwP0r4u2xlyzjkG/x4lgaML2j  
bMbjWLCmUN7Y6+JpcLvv0GytnRITOH2vPEE+DeJNwuoC5Jix5nL0zFo9DSRH  
Q4a+hjNhKg/ezkkT0qD9gWgW1zoD9qTPk4bCKA0Yb/3He+ISHab1eV1+xiIN  
BkMTkzraqLGnf7LsOxzS40bBl9pPXhQYosGIFLunQaa+SxtLDgnWLXCnKtw/  
DWy910JvGex36aqr9RmHp4Hvi7zD9FsbXS/N+1eE4tOgkDr0fRvZ9y5DXyfm  
g7Q06GY4N/Pkz4OuV8lLah/OpkHdh6LTl9Ym8WaXkt0eFqTBx4n1GsqBFfxw  
LW1W/pU0KJbmSboVsYm3wipq/a6ngVix0rqe7x5+ZEz2DeFOGizriE3d6f+H  
t1vBNrjupcFondzKS0sSNEFsxbnZmgZskcd0PiaSISfOb/jhp2kgRM5F+Olf  
gabkon3qXqZB/tawyhw9FXI3ID2XNZQGisObUdczqNGMa3GT21gaylojw912  
GuQdLTqmNp0G2qfdiT8+o0VzuY93mebSgCGO+g9XMR3yv2F0bGUIDajzN4Jv  
aNKjxUcf9Xv/HOm3fdNm3EKPgoeCgm/8TTvat+YyW6QM6Ofs3sUk0nT4pCrG  
livHgCJ38x/Z0qaDWyjtiy+qDGidk9KljUdiC4+ODvJy4BixZqIqHjSQUtm  
VaPrPD3aOk4QmxVKB40RqlzdK/Qo0fad6VOpdKhkFA6IkKFHe0FeUSVK6dAe  
/br8eRMdSs3cKInUSoe1c48ieI/RoX8lp5+a6KbDhe/FGiczaVHWPdysiEk6  
MDLw6fuN0yCyl3co/1mnw3op8SxOkAZRrffbtHilgwRpE+tqLRXKo3ROLAhK

ByPiz4Zji5SIjn/5ekDUES5TM/0hTYkuqKS80ElKh3M04ZH/YigQsyndEs+p  
dPAcVKcgfUmOir2uM2zlpONxlqHb035yxJ4op/Ku8IgvncVzoxwyVHbhmXND  
WTqQ7RDnniAiQ9x3rDLOVKXD+RG2g0fnSZHCg1jZD7XpsLWQfm5ThRQZdpZN  
Sd5PB0UGKfrVDRLk1vf0XOrjdlj8Xi1PkCCot/PqL/tSodNg4B/Lu0kKHea  
bF6wNx2WW879Tu0jQZULEsWxQ0f5Vxi+NB7Ft26Y6faPpgMLD4EagBQNHkT+  
5ppKh4eR3i35D0nRDNWVytDZdKjm7uH7YXy0z1nbzZ4tpQOP0a1zN6nIEd2x  
z3vM6+lgK2Ktwf6HHAIJEdf77qQDf/LNruPUIEhDVdTxyb90mKig6q0QoEIW  
cIKchjIDPn4V+CZNoEbJDpe87rNIAMt9gkyKAY0q9HrESMKXAYn3W0xuONCh  
mtBPXXYiGXC2rcWJxZlejWQJcu8pZcDvISWBTxKMaLHAYMBMKwNQDaMvKzkT  
OiwLir+hkwG57pqVU1FMSOr+wxF9qwx411isPEhgRtAxnlmqmAEL+/tnf1Yx  
I4feXbl9wy4r0khK3PljLKmdPIvhmXAmZ+BAf81sqCyeT/N2dgMqOffXU89  
ZEFN6+cWVFIzoOIB6TMuM1Y0RTmiN5mXAcUhYSwFU6xog2VrXaYoA/Itpi54  
8uEQFT93VUb5ER+K3uN6rjjEL4ksRqoyoPp3b6nyFRxSufHeF6nLgLmgJB6F  
1zhkQshuSLifAU5vk/XUD3DI06TBafBxBtCl++UbSbOhePthCj7sCl+OhXvY  
s6HznhutEb0Z4CPtG5SWwoaqQ9h9ng9lA09c09aN62yoLV6LmW0sA/RdrIp6  
09nQ8Cn3ZwFTGTC//P3J6jgbmjufdYxmWGMf8i+s66yob3SGh765QwYfGtx  
Uf0QDTHdGnzlsZ4BQl/cNNzo2JFY01pC804GiKQMOiezs6NKN+rLJESZME2q  
HFHEy44kvXmW75Jmgv244mY1PztqDZDVsafMhKtm3r4NR3ZCGKHskCYTOvo8  
tGuP4gejrX/VMmRCV1XvZulRfvtEH0Nrlkx4qC5Pl3JUfyYt7voeWyZUL6of  
WBzxCzmds3mLKxOuMaXosUywoa3cclNzvkyopSt2eXGk79SFu9VbApkwpsmP  
eR7ppyvu2r0hkgky/7UuLSazodLyt1YnJDKh89ofJxc7NiR041vthnQmXMiL  
y2mRZEP3bv85vCafCQ/4J35v70GQRgO5g4HyUfyjB0wcAzhk8UiSrEwrE/xO  
6nhTOuCQk+5qXSHKhBnjtQVDZhzyettkfk43838dW3k8lO/XLozs5hmmPSIL

SLJFSXeHEFKEREr2rxRFshNjZswMw4w9SZKSlGixhVRCWRIRKonQIkUISbz3  
7/3z+jzPc9/nXGe7zvGAXTt+w9smGeR7OGAq1iwG/L7nVirFyKCgTzqZ4ZYx  
sLmqvVZyhwyKDp7efnfpDByU3ZEfiPMrXrBq8Lgts9HWFergYKy1yC1I4di  
QDFrVZbGYQoquL7o+QGXXGHgAeclbNCjopv7j0/vcY6AqavLQuCAFITcwlu/2  
joHn9zZ6OL8IUP1+89qdvjHwxPr4V5tqAj0bEHPf6h8DJ263NhVIE6jreJuw  
VmAMZJicqDeOJtCbmeRi1eAYEPTzvJlSaBRhq3N+vAYCEt5ZXJtH4G+U6i/  
VkbHQPOqNyc0thPoz8VX52RoMVBzkvflPzUCCWzKRhLMGFj1i5ystZpAEtWH  
h4U4MVBMCVfyIRNo6e61rH/cGDDY/DHyozCB1r58rz7Nj4G0shCP5AUyUnEr  
eDGRHgNnF5kWbpsll+0J7+CxczHQQDuxtGGajAwjVFcNXogBjYtiZ8V/kZGp  
yPiD3ksxEF+z/db4TzLal17i+eJKDGQZrT5jgt93XB8g+qwlxy+9OffbDBm5  
39IpeXQzBsTljsw+myOj44bTtvfLYmDeePrAncUECnpa+fvOvRjo8C09y1hC  
oGiHiJwbVTFgNVdoKidFINbwDqMrtdh+lz9nDIEJxD+1aPTCwxhw/10/sHQN  
gQo4jM3JT3E++SqmxG0iUMky85fxbTGgRPkT+nULgSoKxMjiXsTamsR7HZYI  
x6Mu+VFAXww4pxwUt8P8vtxj+5/v2xjYMn6GU3GAQG97ZSU83uP43Pl6m3YY  
x8PrVanzSAxYWr+25bvjeEyd02D/KQZWKztrvf+PQLNnD89afY2Brly21vhx  
AglKrr1oOhkDW+XjKb8cTyy3+9Cv2JgGeGZWXIKx2NDwUe9PzGwrdc8bx5j  
+bve3M3/YuC/N3t/1Z0kkKqRqrbK4lg4Tk/2bD1BIO32Lz3ypFgg66vVCPoQ  
yNC5JGKFaCyIOwU82+5GILOPp+QpkrGgT1GIGDIII0szOk/EiFgo0Dto92EP  
gRwFpo8JUmMhZ49sv+00ArknV0rNLY8FrX7XjD3qBDqxOuLOz9WxsO/wLulP  
yw10pmiH41f5WLjm/qjFVBDHQ2/RvxHFWKj0/2Ab+YWMWI8fXRpQiYUnpNKN  
hS/IKMWGYfZKPRbW3tz4dvAeGeW83f3luSa29/ORiV1ZZHTrd6vuW62x8H3b  
IqvvB8IIYKF3TbBhLFgn7uto1CcjB+ER4Y0QC+WHbAxclpLRnOy/3rTdsUDX  
uydtlSeNLLU3Rfk4xELrxL8IX05JodET3CfSQbEgsOBeOvZWHBkEnStpCImF

P2bPFD6zxRE34kpmWEQsSAnObl6nJ450ObXHhmmxoKuXEPEqWQzFFn6VrODH  
QtW6o//k9oqilyV/po+nx8JA/s914QsiSKWcNCh/LhY+HxAMcb8jgtob1tzm  
5MXCijLPXfHyImh9q+r5nQWxkMJSEFzZvwSd6dpC/1kYC7KTOvTR9Cvo9dBe  
B5dbsTDctc65T3YJOvXJaaMnVgoiTr+50CvMHR83UuluTwWwpe9+1SZK4yW  
zgQQUdWx8LPyts0mH2HkuxA1q1UXC21hq20HdIVRnTBnePRhLLwMsKX8FsJ6  
Ryqj9fyTWOis5NzL7yUhT2r+PZunsRDq/feoRckJVa4uySW1xUJESv+Wowly  
LyhWx1d3xMJVexfnRI8SOrqx8dTJl7FQ11Dz88Q+Erqt3emk2lu/n92oHK1H  
QsIGA8Z9r2MhSXJIRkmBhJyMPm9MehcLz6jUoURZErphPi27axj7p/b37qAY  
CS2yEZj/PRoLmZ7PSvclk5DdQamxG59x/vRX/pnB+KrLyg63CWxvwdwdGUKS  
mvVSrlo6FQuv+lsEm5aT0F4/7fyWX7FwKu2wJFljobwglBDzJxZcPn34edml  
hH5GWAZt+RcLc5IGX5cdJaHdcQ5HPi+iwSPI5IXOSBLK5ribXRSigeqKNc86  
M0hogu+/2V6EBjJ67G+6N0nl+Fz4clEJGji0h1KW1ZNQeh5zcZ00DVq0+d0Z  
z0noY2HK50AZ/PxuyOsXr0nI8FZu14ZLNHh5+UXjyAcS4pVfr3mzkgbytiYG  
3z+T0HBt+RW+HA2Wks/0Sk2QkN6TR0lm62mQriFqchRjTmt7yF8lGoTNX1m7  
8IWEDjsnlCyo0iApeokxY5SEND7vHhHUoMGBU1/9Ng5g/sKEVoto0+CnQuzB  
ZV0k1Lnkoa2EHg28R7/c9n9CQgUZUWyyAfZX+KDuwXskFKxkUC+LaJDZ9SV5  
Op+EzO90Ty83pkHw+a6wwCQSWrnrzqY1ZjT4dkP/6vcQEhp/cdJznSUN+A5G  
TzMwf3Wu6ueV9tFgfHRFJseUhNyjr4hoONBAevqN4JQEcrVVZQ4jbxq0em3u  
eccVQuHm9it3+dJg0VtdlZkTQsjqFXn/bn8aeN6yi35oIYS+/2TXWQfTYHke  
bcMGISG0VTPynCuTBqPmagJbwgSR2IOtHZ4cbK/WWVP3g4IltznhY0k0WPik  
H7xVTxDFHPcPCsiggyFQ+KngaQFkO6tWfCabBhsFHfJVewWQInvsfVguDWQl  
tqesvi+Amq+6WtOuYnuDn0Q6MgRQ9pY1TOZ1GkBQ7bvxEwLoRENfDaeEBkXl  
Hi800gggZJfxI+k2DfoS3pMeGAgk8pCtWmo5DdyMXbXMNwugoVPSbpnVNHih

liqyYi3W5wstmefraFDJJaGDhABiJrHaLz6iQeGD6HgVYQF0ci0pqaCRBpsl  
c7Nu/1uMVG4sNrz2DMezIVFp1cxiNGtQF3ijnQY7twQNxf9ajFqfhheVdtLg  
042oOLnpxSjXUX/wbg8Njod31gjNLkanxn4sreqngd34eWPXxQLIOLh0b+0A  
DbT3Cz51kBBAsiQ/+sMhGmT91hKSWiWARINV7z8ZxXxo7L9WvEkAVa4fnXz6  
mQb6uzjHDpgIIE5Zvkr7BI43Q3h08yjeV+Do0c4pGkw3F4rpRwsgjeerMnqmq  
aWBcu27+eq4AChaTChgTjoPSynXdQkqCiBQ7pSy6IQ6UjkT17sb7x8DwyiuZ  
anHwnm6ovNffCJWb7VIY14iDnNY5f3aaEPKWSFv7XC80BjN/squHhFBj5pbl  
6WZxELZ2nCzCICFmSajoOu84KFtsV7NiSBi5EjfiKb5x8PBjReZy8hKkF/SU  
JOQfB3kuX5/noSVodNtKgbEzcRDeueObzYUlyOzJ/dkbjDiIeXNR1sJNBAm/  
mf+y9UocJLPq7dyFxnAA2uCrVhQhtqse9blvF0Pll6w/rroZB0XFHnJ/A8WQ  
9395H+bvxfkFD3mzE9LAYapwyetvQEAsfgw7Wm3iiCnKaLf5EAfUCl3/uFpJ  
5HLippXxxzgQeEfysZiXRHrPu5/pjMeBVojK6isIz5805aalP+PgkuSqh0Ba  
KWQm3/zgjSAdnnzdeSr+tjRaoi9e5qNAh/Ci8SPmVVhfyUadXrqBDk1rTy42  
wfPScnJiS4MaHdw4Z47VfySjpOLO6rXadLiwZr/wpqUEKmWZRLVtocOb8qZZ  
Kp7PnV7lOyO20eGcEkknwAjrB/nshh6gQ6PnsomTvgTa+k88nm5ChxdXuJoS  
WE8e6o+y0DanQ+oFST0JPoFy09zaudZ0CEjxE1W9h/VpQBdvux0d1BZ9y0CN  
BBraZ2r3yQF/T6r1LuohkLKoaq+JCx0Uq20tTv0ikPlodvaUGx20961Y/wTr  
Xd/HEkfyvOjQH2BU5UpQUGJe9Np9x+hQu/1pwE45vK9FFX//9wQdPL7FFh9R  
o6COQ+4FRafosNLUsLFiCwVN6b/0PhhEB81fzessgYJkqWaqpFA6/KyYWUNY  
UpDeVMWX2xF0uG2as1LUjoIcn6uWuJ6lQ7UDPUTDmYLCb5w/JRVHB6fLsWlR  
7hSUw5bUqWHSYWDY88WUDwXVeZ/9dYxDh4yOeS7Hn4IGd01WLEuiQ8c6eTWj  
0xQksM4j/Akf2598jiQTQkGK8y8NT6fTYXHX9pi5MAoyfW22IH+ODmmXX/35  
E0FB3pWVD9tz6PC+akfnkigKYqWr0SPz6KDXjo6tx/h6YI6ZWgEdhrKK5cwi

KajVWkq0t5AOWp32tifDKWhCPaaFUUyH09rintn4PrLYFFfnFh1+Bvy88xjb  
oz3mYfP+Nh1IFkN5Y9he+4ZuSnI5HSZPFiQIHK0g4Eu7uw2r6SBysbyLjP3N  
iq7K/FxLh6ykT71Shyio2nnjoayHdJiYlvw7Y0NBb7ZeWG32BPPD+3muxYyC  
5qnS734000FZxp8at52C5H/EXLrUSocC/T1tqzZTkHHHlId1Bx3WIR9el7KO  
gjxveir/66LDF7PTAUMUCmJyej5ef0UHm/yja0Rx/K/9Z17s+Bqfv/MYITiF  
9bRjtZ/wOzpkrrVWWPueQOPr1DXvDtFhwbkkM/QFgaQWLky5jdLhWGNEidhj  
Amm+kb4n/ZkOdzRvFHbgfLStig2p/UqH8hO6j58U4X0g48e245N0sLYSNRrJ  
JVDGaa+55b/o4HhprZtaOoEqbV7Vnc7Q4caOEx68RAL1b7KIDZrD/v0Yjqcw  
CDQndn/X+kUMuJwaIXUD14PcR3XhDkEGzH3foO8YRiB4ktsctYQBUm/fGIHO  
YD2cT07YKM6A06op/t0BBIo7S9vbJ8Waxmbv/uVgPa74oeBID4UBh3QsnQ9g  
Pd9g3uTXtZQBkVdG1XQx9rz5KapjJQMclm510cHvC1EkktrkGEBc+G/MCp9X  
EKyR+2w9A3pscivDgwicXzYITcoMeGFOaigPxfvFztN1DWoMUMt58nc2ikDM  
gvT2hxoMEHUXsTWi/68eKwfqtBmQVTZdGZdAoCa//on7egwQyq9aX5NKIJ/O  
uflKAwYEWYbHfsgghklj+WulyxADpR25N01cjdO280do7xgxYLH9udLyMQBaL  
PDeXmjEgOMLiRX0tgThPr1lf38cAenzVi0+vCKSm0XK00JYBp7xbWrRHCdSS  
8vVkgQMD4i/0OhnhfiBxWJuX68KAp5EH/mZQKShp4n5Hij8DdpyIaA93oSAN  
u4HB5EAGjBZMj5gFUtdzikWTicEMWDL5av01Js7/WFMiPpoBxvIB3UQZBFfI  
nu+PSGKApkdkdq+4DNIOxQLTWHa/IOrTgUKMqjzjUzgmQwGxH06+/zldhLE  
ueqYcjlX27cwVLjHTwalbR3q9ChhwH8PPsePdckg3QtCw663GXBdTCxs84QM  
6l684ceRcgYIvpG/XSwii5a2HjdxrMPf+/U1qCBZlHXkl51VowO+dP38mHBd  
Fm19tMzTohPbP5XQkvZEFvUpGwSZ9TDg7kmThJB3smjI9+g0GGDA8z8yxTRp  
Kqq2v1SwY4gBzDqLfXeUqMi56vFdglEG2P5r6i41oKlcmki37gQDPh58vUzB  
jYoMx9RGtKYYsHpjMjUvklre7tn7S20aAQZjzVGzNCqKLj1JUp9lwPexZYF6

KVQkR02hqs4zYIolLuuYR0V1YXeVIAWYMKOkw/C4SUUuAz1bFISZULFSbuxw  
FRXNG/8xlRdjwsgjZ2fzBiq6WLjKYY0UE7aFRwiqtVMRhxl/vYdgQIPH3tSQ  
HioK8voxn0xlwsC3p14f3uLzTI7aWaxgQkztrVenP1CRuUJLocAajpSsfWCq  
+pmKtAX05+7LM+G/uQoJkW9UtOZ9vs0ZRSbc2HaILfODikTqpa5oqDAhstZr  
ufU0FU3lhv8Z28iEHR/spXUzVPQmanTvp1MqNGsHPSYpaLGw7b5h3SYsGk8  
umvXXyoq3V43LaPPBFVmyR43jM+vVNvTZsCEsg/CVx/g95l/0i8yERMef929  
0/0PFZ3qXfxzpzET3OK1gqx+U9GhCj/zP6ZM4GTGXyr9SUUmGX05ty2YsFNo  
XoE0SUUaZ0wnj+/F/t1xdewfp6IV9mWmSvuZYJFw/LzQRyoS0lmTPWDPhNyA  
AYv4ISqaInGTmY74fauweq83VNT7/afx/sNMmFg853y5m4oePXfNFHnlwmiI  
ctguzG8mdytE/ceEkB2BxZW1VEQ7UZCmd5wJ0k4y4Wl3qejEHvKnB/5M0G1z  
3jF4nYpA9CPfPZgJ6w8OyXanU5HaR7vRvEFM+Lw1b4jOoSjq0wOD7igmGliT  
lt+OpqLP9Mzh3QwmnF3xWD3Fi4peeghuXcxmQtC6nCd7HKnogfHJxOpEJkyW  
rdrGs6SitEW7t2xKYwJPSEqhaRMV7YicZllUM8E5q2bDnm+ySMXZ/XXLVSyU  
SjRVVw3IlopB+2bGdSbQtoVltbfJotHfV3p/lzHhjX2z7y9ch7zTB9Te1jNB  
qlpt9QU3WRRu+zA6o4EJ1Std+zL3ySjPrU1d1s34fg+DHXbbZdG2b0KRj54z  
YW732+MrZGXRkO/dtsIBJuRF97GNHsugLe4yAYFzTBAbTfs+uVIGKVO/SKxY  
FA/d6hZm0yQZtLT50bUHgvEQvyziyOR3CpreFDgoIR4PtZzgyN5GCqr802Fd  
uClErjXlaz3G/caQn6TxRi8eUpUyple3EcikXnTcNCAeup4bXVBwICPd0+/j  
x4PioUbtbZTZDjJSUq5SSA2NhyVIGdfcFMlIONHHefBsPLxaeN6kOSKNmg82  
PQtPigef9u17HddKo0qxi97rUuKBdZ+94sSEFCqqDRZoTo+HKwvrs9qxHuQo  
KBtQL8SDkuTO+yVHpNCeb/SiW8XxMFC7X0DpsiQyzD9s6nArHkgfNJ79PiOJ  
1A/ovp+7HQ+Rbt7uIRaSSOL+8HLL6niwGvpCuTElgdqZxqwPzfGgEcl4q2st  
geq2rVRMaI0Hw7fH+BUqEujW+OQDrY54uJ9eoWMqKIF4tpd+R7+KB3tuhm3p

fXEUQwpLVXodDxGjxQ5XzomjgEqbza0D8aDloeX4MlQc2cot+m/FKPZnWaa7  
9HZx9NCRZSP9OR7IXrvCO1aJI81UsgFpIh4+rVp/ffu8GLrYlqXwdzIeNv+h  
/T46JIakRNZJTv6Kh/mqe/9ZNYuhKOOi6dE/8RC4SmwRuVQMjUdqDb75h/np  
f/6k6pwYcq6oetq5mAV37zrUOTLE0LNJozvNJBZUeU9M/E+vb1N/IlMnyoLO  
m60Hb7uLoWvetsy7kixYvjtZMsFeDC271H/yOsGCwm/6wunmYoj52t0pj8qC  
HE9Nq3dIDP2ifjHOWMECwqP5Q6i+GPK00a2euIYF669Zd5/SFkOdnL9U2joW  
jH+nKvRsFkNGT+IWQpRYwJr17arAuHRB/JOfKgsotNwvivh90YO0To9NLLhq  
sihAHZ/HDVpd46TFateFdZ5v8X1zJQVXrLewwPkkt9fMQgwd/6SebLqNBxf2  
Oz4JcRBD/Qr3QrfvYAHdg6d71lsMWbjscNcyYsFHN8bGE2FiqDLryZ4Npiz4  
Jxp/a2+yGNrQtXfLGgsWvFk+8kT7mhjKkOyRk9nLgVw9306rNYghkrmLiOh+  
Fvge/VW3C+8zQbTRyXl7FlgTu29wSeJouMb/9U9HFvjL6Rot24jj+3u64fNh  
Fgztkoj79v//T7skq8eTBVtaa9Y33xJHF68mx7b6sMCqSDhdEgcSb1fdvzR  
CRYop/bcS14hgcYPqKCSIBbwYl951/ElkDOvdENBKAscF/X8duuSQM+ebSWy  
I1mwP2aHa+tySXRtp8UHBp0FJqHMQ1bkmhZ+lu2CBYLzvgueW25SAox7zpV  
BCSywNRWs8f7gBTyVPXIHEnD/CVw5DrFpFGXx9RpuywWTA+vesD3kEbGueFH  
LHJY8B91+n1jhTSSl0nQ3FLAAp+fK1ghqmSUvFdm5cZrLBij1vcW2UtG8/Hn  
BdfdYEHHR5tymj8Z+T1S+Lq0lAWfpHIUp7hk9GauuEfiLgum2vYdcS8moz36  
uvUCISwoErgo8a6RjKoDaopm7uPv2Y8GTg+SUDzoa+SHxyw4LeCclYtFoCXr  
Dnj3N2F+b24f1F9PoGDnt9YdLSx4u6bp9yVdAo2ke21rfM6CaE2dZBdTAtl3  
ff1f08UC2Uf3bMPsCFRYLFji9isWuNyiT/xzI5C26fyvwtskOvulprxI1De  
Wea7C+9YQCa/O3oa60PpaqmnqcMsmDPs4UbEEqjZf3DadIwFWfbezwpYBIpR  
uK0485kF0rd6Q30TCLStN872+gQLdl29RA3E+nAq8UDM4Smcz2lb1qhmEqjY  
aEOJ1DQLnDpFJNrOYf06PfO6/g8LZquTXf47T6A1xc9ET//D9VeI+luxnuw5



mqOvtJgND6fY8lfw82RZf69XQmy48muE5ZyN98OnO1PZlmxwEWsy08gi0KJo  
4uF2CTa0ci71KG09XqU9PPFVGu00T3f34X00cOzu6jwZNuzQk3W5hfW7Wg7T  
0nYZGxZT0/fZxhNo2MYxVGgVG342DgoYYX9zSGpXy+XY8OvK8d/0cAIdqP7b  
5bOeDR/Er1/bcBrvFyfbFq9SZkOeLTIV+zjmo/fUkbOb2DD3SYIU6IT54Bon  
aGmxwWmilqFgg/kwkq0a1mXDgoG1loYZgTyKK2TNDbE/spv/ymgRaLUr23h2  
JxvcDnhTBJQJ9FLW+dSNXWwYMfUxK1hJILPo+RbyHjbcuXBhWk0Q27/fNK7P  
iQ1Dc/GyezrJaji0rCzhCBvUee0lw0/IKKf648AONzbo5tMsIqvISEox0SDf  
hw0zRUKBXXlkNDndOekbwobq1WrqCgFkdL24YO2aCDYcCM/wfuJFRu6uwXuf  
R70hSEmGcecQGb18uqJlh8mGsVYp130mZMSN/tlzwmZDamQwtWA7GZnp1Apl  
cdkQ8P5Bnrw2GVXmuLrOpbEBaT9VS5cno4D92kklWWwYfxGwPm85GakJC9W4  
5rBhd1Lbe2MC21/d/YmSxwbNhzyjTDFs/8nCZU8us4HecLLojBAZHVAMMw0p  
ZIP5hx0HtOalkVSf5WnVYja83n3l2dRPadTIXX3pdQkb4v6bLzb+Ko30Gk+0  
c2+z4c+01pTOMDTa+vvB3M5yNswXqWT0DUmj78V8takqNljrtvDMBqVRkauH  
Y0EtG65bCLzmvPng7tQtTleHbGi7U073CD9f9Uz4rsgTNoR+6DD6PSyNXkb3  
vq9uZsN/L7bZ7Pwkjbg616X9WnG8l/fzb36XRmYfI3as7WCDuF/2gv2sNIpW  
nK+Uf4nzq/uvym1BMrrnGq07vpcN/Jha+4viZDSeI1Cq8IYN+x7UL52XJSPF  
PvpGpUE2rF51l9a/loycqUsKIT+wYXi12Q1QJ6OU/ez1Kh/ZkL5XqdDQgIye  
ccVzVcfZoKi3KL7fgowWP+Ou2PidDcFHGUeVncloqzA5Xf0nGxw9BWeUcX86  
ZZxC1pjB9aVJWRMaS0YD1RlLtBZx4PyhhhOhV8mopvjiLz0yB2qNrxxY+ZmM  
fo6tC9gqywHjz06iij9ktFGxYHzbcg7E5DSFdYkQKDvn2rChPAfuX7p5MIGJ  
QC961Y4iRQ58l10Ur66D90Pqzf6dKhzyKp9izgYIFMIte2GsyYGMkeJRdVvw  
JU919prockBHRTzq7H9/jySVN5tu5UDVg4qppjadwP4uufmA0HLCL9B91wvt2  
YrXhdksTDrxZeKdoloz723Rd+R5zDqh8soh/hPuB9snHN/fZcOB31+PsgOsE

8i02VbWx58Anc+0dhbcJdGmsqWC/I7ZfzGE0sJpAvQqW8naHOXDGdkCq5yGB  
yK6t5+1dOUA7FL65s5lAu3P2LXPw5MDhw331Ps8JFN3bkXLQB/PDv779fDeB  
vtp0sw+d4sCvKNeOvkG8v3MPkg4HccDg2uXXH0cldPhpX8yRUA58HKfeOfeZ  
QKmkw3MukRy4zfb+/nWCQM+MBkJcYzhgf80kaHSKQALRrj/c6BxgZh+tYkzj  
fli950/B4sA82zu09Q+BTk17fvZMxPbeFTlaM4f3be0xL28eBy7b/RpxWCDQ  
O/9j7/9L4wBces24sJiClhZ/OXwsiwNcr3wr+IIUtG/Mr9c3hwPXNGx/6Jlo  
iKHw3e5EHgeG3sNtljAF1RwNf05XwIETaqMnkpZQOM/zPy1PXuPAP6PJ87tF  
KGhjb3DjqRsc20tOVN7D2F32j1FgkQeoT35t68c42yai9vRdDkgU7M0ux/hF  
4r+tZyo5eL9o3m+FscjTs3eDazjgUyvb14PPB5KAZmg9B9DxoWtF+P4QI3px  
WAMHFCIHtwWR/vf7nvCGiGYOPFetE5rH9o9WsfIjWznw96YazVyAgtZMi8lF  
d3DgqHG32oFFFHRI+M/giZcc4DYc19ecj1DW0rHLzr3Y/pVeEZ1/CdSt3O1t  
+Qbns+hm5x2YT4r+Y9VtgxxYYau/PRDzbb07bHzDBw5EVn05G/iDQNYDF28t  
/ciBdIFq7s7vOJ9DI7b8/MYBx930GaafcH9mHZsZ+sGB6qeih2Jxv00yDt5/  
8ZsDZtvZocnvCTRfqWN0a4EDpn/KDqr0Eejnny9WvtIjILrzRvbpRpyvYv14  
VUuAZ1nDmsdw/p1c2dy5e1kCZM05mRrWE0izQYGj0toEaP1WHR5TRqDBiMOe  
gxoJUDm0T+Yanoet/1ojHPYlQPGXp6+LfQgkJnUfmdomQH6Y1zF5d5y/ckWL  
dR0SYL6XNZjgTKBHiBFPuCSAjoYmuWUfgSrP7kht9UsAa/Ub63fqE2g6eaPD  
/YAACP5cwnuE55N03ooV188kgJlSvKG/Oq7X+l+58VEJ8L4g7LUh1iMFi0uu  
G3MTQKm3bOINaQINETl+WvwEKIwvtvMRJ9Da9RxN+fQEeP363yFzJbhfGHuX  
/8tJAHth/9LQBTLqtbUPG89LgJyrJzY0/SUjqoex4euCBMg8y2BsmYejXpzc  
o8obCXDjZB0dNUIG7akSjMLSBGiyeXHCc4KMxAtmd2fcTYDs+fKn7l/IiNnQ  
03a6JgF87F+dfDJCRo9fNvDc6xPAq3FqQWWYjBaN3Lbb35AAcUEKU25ivRVB  
Su7TaE2Axz/L9y5/Q0YCVmBvUEYr9VbZuX7yYizcn6M3pUApQUt60x7yYi4

suXb5lcJUD/vEkbvWxpts990f38CyOR23Rt4SUby1QX/GAMJwPslmWjXRUAf  
Jm+EtIbwfaFTpUMvyKjcaY9M/KcEEH62p3rfczJCH2grtb8mwKazbJGN7WT0  
xL963dvvCbCgJhgm30ZGVn8mVVg/E8ADLtRrtOJ5HKeqqTOTgOerYdqBFjwf  
pNz0B/4mQMjphmtpz8hoKCsLsRcSYDp45Z0vT8nIV6HDVFcwES7eWu9zCOPJ  
m0v2vhNOBGfew8jBZqwPekeOJVATYe7Czi03TWSkLtDA1FdMhAbZ+SP6+Pn2  
ZTrp3I2JkKVVaD6EsaV6/uVh7UTYXzLR/Baf96K873qSXij8+OZDCsP30xoR  
t7cZJlI+hnGBmzfYIt51YcdifC7ImbhI8b/OcTUJxslgonimHIt9mdisKLJ  
wDQRpvqky5jf4OPf2sfMU+EsT3vbHMwH/QYI7fbbRIBaQqVPeogIwnxA+j  
dolwkrX+1TfMZ2p62xf+wUSI8Qn7uAnznX/dcHbMJREGE9zzXndjvbElaHGq  
eyL8vVtbavmKjMoeFIsg70Tgaw2ffYrjWf9y5bI0v0R4+l1049drMno7P6MD  
kYlwbRlD6twQGxmyNbd/OZslj/wXebz/gOe1jI9xRlwinL+VldU1SkazKq9s  
xjnY/hpF0Xd4Xi63u+eXdS4RTmcWNRn/kFHe2/GgXRcSYc/LWt6LX2S0wUcx  
cilvEUipI16KOL/1oII5JtcSoc7tr9jnOTKyKwwo/F6eCA+iek5+ESaQY5XT  
3OfqRPha9fcbR5RALi1G+0fqEsHnomjeJK4vz7eqV989wvb3qn+Ux/uC7zfi  
b19jllwnp2iuJON5sXjW+uWzRCiY9Ho/QOD9QWaoL0dx0+52/2UDIeilZ79  
ae5MBAsniTUdsgSi6d/e97gnEVS2bA1doBKIZZf9ubY/EZiejDcLSwmU5Eyb  
qRhIhH98+dudywiU5ue79/ZQlij76LmFLcf1fdY2/8Yo5of/Y/8vjK9eXm91  
aSIR2llLzwWuIFBZ09Sv9OlEcG+daD6Acc2XRxc584mgVPZ+/XX8frN0qsVZ  
YS68T7D/GI7Pb18XkRsmxoV/F9tC7uH7X+p4/DgtxQXPshuHurB9/aZ7zP0p  
XLjK/enG9s/eFDngs9SLoQGW9+vw/6NHls15b6SC05nT4gmUwg0HiG4+4gc  
F75szt9jjvmYudj1fb8yF1jaYnsjMH/zZfdNrdS40NiX/ua3BIGEGi5nm2lw  
YXXX+CIPzLf0x9Mm2/W4cNr71jUxrH9kZ53PbTHgQuGBoDkLHK+VEiYTmxG+  
z6iCESVEIGVN2SxFMMy6cqzzW17iQCj07hdJBy4cee7xWRTrKRNODogc4oLp

nr/7KL9xfeXQ0wVcuBCyPFhtJc4Xh3r7nb+9uCC3v3l0E+5/fiK/UgbPcGHn  
h4d9iZ/IKHDl27H+MC6gVIdDIWNkFKr+xLA7igu2H3VSJ3D/o9ukjz5lcGHd  
5oj2GJzPHPeo7Q1sLkgHo0vvcP/jBXnx6riYL8l/rfveYf2dtcXgTjoXFHvl  
Ojze/K+e1iTfPMeFbNfXIRK4Pq7Vkd4UXuDC5LDpipY+Mipp/7o1/xIXGiQS  
Vl/C9XR3sJubc4ULxYxXn5JxvVVP1Q5lFHhB6M/BT1m4X9YLXdXn38T+ULbF  
1eL6bFyalJhQxoW34YVrF3D/bFEJfs+4x4WlA8+Vj2IsdsjQzLWBC0N/c45r  
4Pq2TBAoNujC9v19vSSAn2cv0zWZ7OHC5hvpYnyMP1/2elvYz4XtutsjTPH5  
BpqZwS4DXOjN712+Dt/PrmmWpg5xIS3dR0QJ29drPnutZYQLC0Uj/rbYfpXu  
jca0TzieUZYB17F/oW5HXm/9yoVVJXxdDex/89ekoG/fufC5997bAczP8vB6  
yas/uXD5fBm/doCMfISnrh6e4UJ36tkzLZjfyhQFkJnDfB9dWSKK58+StQf6  
ni5wYSA70jUMx8ehmBkYI5gEXR/yylZ9JKOr+pXi+kuSIKo/tnES9xMzm1Wo  
QCoJVHd6Pt+B45/xxurVIUoSmH86JFn+k4xGfaJPEUuTwPHeTL437ieM2Pf5  
0WuSIFxeXH0RzreG24VLnNSTIHGG5iu081t2Z1+etGYS1AS+MLbB+e/ZlmbQ  
qJMEuuUvBiJx/Qh+8Duhsx1jlcmlJLx/2p66SPqMksBJjioWtIZA+XMduXnG  
SbBw4ucZY3kCGVN1X0haJoHI5YlF57H+T7nk5duwNwmW2ErdVFLBemBTpmDE  
/iSo/zhlk62G+4vZ7JaPjkmQfVg223gzgR6G1Gc/+i8Jzpr/HcvA+oMsNKUT  
djwJBtcyRMK2EciVp9C2+WQS+P8btd+9He/7RcyFnOAksDxkmFCEsF7bUpll  
F47tvaQrgPB+kffwk5ZYdBLQo6QePDAiEPRbeYYwkoDHOKWYaEIgnnf0v03s  
JPgY+s/plSnuF103Mj4kJsE73plv5N0E0jz7fvN5XhLs0nLeuM2cQGfFZZ7u  
T0uC4VpNexsL3I8yTdxFspIlgKTu01MGSQHKKwX/rzicBsfEe02oPgeoM+zap  
X06C/mnq/SV7Md8XgqU6riZBwuX60acY+/6T+Xb6ehL49knsjML6q/512fNl  
JUlQ6f2f8HprAi2t21d6vywJbq/YcbYS40fR7ADBqiS4piqZfN+GQH47G7T3  
1CeBccRwLGs/jm/9tnv97UlgWmzowrIl0GrjW/q+b5Pg9LbIW80YBz1WrP7z

JQIY97rJhzBuMck2ZM8mgeGtyDV78ffBpO5/HYuTYbUjN4iHz1/fKP1guWgy  
WJQXnLqN7w9VvnmXRiIZZsfzU/QxbmdaxriSk+H+dIWle9j+8N0Mo2vLksH3  
UOyVbOxfR+H69VarkqG7UX25IMbKlvUC3+WSYQ9dhuRlRaD05tnH+srJcHCj  
2cGlmC9Vy1NmTbrJ0Fqpve4P8x19XXLD8a3JEGKYWhSA4/FSrHijtGEyKMZd  
enDNjEAxLSPNDruSgZbikCuG49dr5bxndH8yaJuL+hbgeGvcnNnIOYDvD/S9  
/BjnA10yQ0LDKRRkCO7uiBnfi+LZ3tj1xTYbMY4FrZXH+sKzNbEgnsf3MJ06+  
BgTSt9U6oJiYDLsmfz+VwPurhMHZuGW8ZGha/D2d0Mb5sq6tTCwtGf4xdscu  
x/qYNekjNXk+GWQPcEU1cD738/KaaouTYX6+TiV2I9bLoRO/Sm8lg1LuP/08  
nP9xroaKBXeSYQMrUbJBIUDqmr0xnPvJ4HBN5ugqXC/Rz6UNDrYkg58Y5QOB  
68m24oiP5fNkYE+u8XdVJNCGi8UZ07qSoXjW16tcgUBzzD8Nm+SoRJeycli  
3OG/+4fCa+zfAHwLw/o8FA1biw0ngwuXrnJ0HYHWSZ298f1zMqgMKFf64Pp9  
9nal6KupZJC/ttz03FoCBd4s96qdTYaAR5bBP+TwvEeq7/cv5oGpUMlUGMbu  
yiHSpIQeNjrouG3GWHyacmKjJA8i5P4r1cL47pOSZoLKA0tlTpk4Po91c25a  
aAUPVO+NvWvE+HC6pdLMah5sPZPcfRvfb8Y0qJmU48Gb19MHDbb9mlFZdl/k  
edB2etH6NoxJXqOxA4o8MKqrspfb/n13lfzRq8yDVboW6xox7rfSLX2hwoMJ  
N4N/NMxPiS5toEGdB2onFhevUMb7n0rRmToNHnwWrxicwpi2ukOiUpMH1p+5  
X19uIJCDkNz2Yl0e3P3kYn8bxwNmTDoL9Hgg3r6VchPHS238+LHcrTy4E/LD  
/xa050JXVSbfcAcFl561Pt2E9+/LB36GmPCgZt6QZ4Xzo8L+0k1rMx54LrY2  
/g/nTyPpq/cGcx78deVFMHUJ90E/el/PHh783C7EfKGGH46F+p26LHQ/E6F7i  
qbi/Zd8ls3+48SAgqOJIIs7vIq/Dxi0ePHj72unZC5z/lUuv/c334oHO3Yqm  
ZbheXoXu9Lc9xoPsGpGQAtyPZHf425Wd4oG59b3KKlyv3Ccta06e5cFg6vu9  
OU4Eygle9soslgf3L3ZLth0i0I0NHjy5OB6EaRI+s3g/fMaeFWhn8uDSyMOv  
Fi4EEt6n+lE9iQe8h3X77uF9kroQdEmIxxPasoLjxx4EUiytP/SGzwP7uQyd

Nk8C7aI4tiWk8yAnRCSz3RvXaw/z9uccHtw8+Hyc4Uug5PjO449yeZC3uyfL  
/TiBcrfKKWxNyx87Sj/qn8B6MPtepkUBD0rKdgW3+OF+tWfx/nVXeXAucdMW  
tj+095yV2J9CHriT9mWjkwT64/Ih8loxDzjd6U7Jp/B+TtbUi7nJA59bE7pq  
AQRa/jDi28FbPFBQf195H+MNgu3XNpfx4I+E8NVdgQTSU5BxX3KHBxtlpmse  
YmzPuP6yvJwHF9OyfS+e/t/vx0a7vat5EFmd1mgbhPmqftHk8YgHp34K9Rue  
IdAI183c7RkPUgtzoowxpoUUibi280AqbuHAJ/y+nNtks0snD1oj3py1xvi+  
5Tb2kR4eNF8VPBOIz3fUjbU43M+DRStMb1nj+5VVrxQ5v+GB2x3Xw5exvb/W  
PBV1HsD3jZ269gH710D5euzQID6v4paxDMYpS4hnTkM8WLRhYL8G5sN1TlfN  
6QMPxvUvyeljvjZPOnIcR3nwdbybpiPms7U/z/LgZ5x/e10f9+J4ZD9vu04w  
zgp9heJc3jEHWv4KOYwwQ0lo2ymjg+Of4lmi/0UD85uCT+yzQv343z7jfY/  
MV9li4vP4/jnZ4Ym2E3zYGFkS/uYG4F2xtbvsZ3F8WUk2hri/JEK/lC8f44H  
N36tp5gcJtAbXxGJ/fM8cFXd56mL8y/U3qbVWoAPhqOWUW0HcD+wCFK3FuLD  
5SBe/hk7nG8oK3GfMB82v7BdRsLz6vaGQau9Ynxs75YbvXh+xKwWumklwYep  
7mdqq/F8tiZUJK2k+GDDaLhniutlFPzkmyWFD2Gh7Tct8DxQbl/Ya76SDxm+  
ji+/4/r8+UihZPdqpoyP32Yswf38ccVuqd1yfPhzU+iulgbm81Jyu+l6Pqi2  
nKl8gPuzRsYdDVNFpTqVfd2ggPvJH0dVkokyH/6ejdh1Dvej0FrrXep8cGY  
M1Jeg/uhz7Fdt4zV+dCwcv/VY6txvrn8J22swYeXhXFBKlhfde6+9Ry0+cD0  
UBrox/uMxKqdNsiAD0UDdwwlsV5b1BbfucoQnz923NwN7yM/ojvs/+zgw0W3  
IdpjMVwPQ25Od4340Jbs97psCYHa0q6/5u/iw/4qnSs78D5Sb/bjyElTPqzY  
sepXD95HCq/T3dUs+OC7oyxaSwDH/3DbhyV7+PBVg/CcwnoxSWrpfyNWfcJ0  
/KVcv0BGQYGFx/Ns+FDBvjKt+w/rW8XvX6Ns+UD6qP03CO+rzj1bTznb8yEm  
5GJS0F8yMjZ4FrTUkQ+fxPjFmXi/0Run/P7hxleuuKbBaqxPVXOdw1448+G1  
rHn+J7zvrLYp+FtyhA9nQ788UcCYLPA1KvEoH7Yf46w7Nk1Ggne3LPJ14wP3

0j90Fd6Hpr2iabs9+DD5ek2vLMZvn0rHC/zHh2FoDvqC9+2GTZcSan35MHPc  
+uqXKTK6ztfmhfrzYblW2CpZjPm/HqfpBOJ4eorHeWA9Hep04NzEGT7I9LUk  
9H4nl5lP2cX9dD7otpHzxTAuCR2sbUzlg9AyiWP/27/S3gQ8is3kw9rVOt1V  
GEeAYJPheXz+deNyF3y+e0Fay+9cPnSnLbq/EttjLqLccTufD6hUO2Uc480n  
Kl76XeXDto7cz51Yvy/tMO9Tuc6Hm81ip1uxP8OZx4dyy/hwleVP+w/MR7+0  
r8jpO3x40nn4Kh3z1/HcR2P3PT7YSxgtLMf81izxDv9WyYcbXoUZe2bxfhDi  
SoF6Ppw0LxV8ieNjefCA8ft2PoQ3Ppe1xvGGH3Y+9zr4sLCd4UUSxHon2TaJ  
3Ymf9IYU40xYpN1v1YPH4Kuer7ZRCLQPz3LQNpbPsSv3c+j4n23dOnOfIVx  
Prh4bxLqlcT7/e0dzb+/8uFShBY1EefrhX2GEy3f8P1v00uRNIE4zG0GQT8w  
H6Hnx3LJ//v7n05nwywfnt08Mm+G9/NDKdozWXN8CGjcIPYF4/0aWnJ+83z4  
Ls1xT8T7CPLW8KUKpEDGBp1Djbg+lvWoCHiLpkCqyGsJmeV4P5dS3iclmQIx  
2RZWGiuwPjBVyC4np8CK07IqCri+3kbJj7rIpsCN4NPuxCo83+6t0V6yPAXi  
2Lm14xhXfF0ZfWtVCgQN3dl2B9dngdLyZwfxpuD9JbDBA+87/CPUpYsUUmCV  
c5zkAsbR6RT3a8opIJER0sjA9a2e+rSZqZcCa40T105ifdPHi9nsZZYCYf+9  
kF2L9U2p9Bt3+30p8C/OvK4DP2cm6WfscKgB46bYveYYH5FMfartkgJ+bM9X  
ifg83cSJuXXeKZC/vvfUFXzfxT05GSt8U+BEwvcwBYzFxC01CX9s35fHGuew  
ve/ZVzwWBadAvYG08knsT1L84WcDjBR430EmO4D5mTUT8+xhp0BKQYSJNsZe  
wpX/2rgp4NCkv4WxjECGDBmt2vQU6LwiNqy2lECfaM8yz19JAWqEybykHI/c  
modnrItSYGTKiP6XgufjdKWd4M0UgDUSr/wwFtUs1aooxfEpevtpBO+TdccK  
pY/ftQH73ZNBnhirvE1v6byfAg1BT1+G4Pin2tDjDR6ngMA638r//V7so++2  
INqZAhXDhyhZOH92yKGQvsEUkDx+kr8f42t8dR2jykg0xbpwcGYQlr17dq3  
FMhOsTMRwd9HhooWk3+nwFL9p786MB778ts7dD4F/my5s+0zvi9H6ZuJukAq  
fOAqv8vA9tgeHV0/SEqFe2JjL5yw/UvOvV2UJpoK/c6bn+lgf2s6Xw7slkyF

B5oGMUo4/zJOdrStk04Fv+HZiEKMAyRaa/6SU6F7q/GNzTgflc0eZ9+STQW2  
Ak3YDvPHrypzWLY6FeJd0pQ/Yr7Vshnjy+VSQWzlQdp1nJ8N4U60lfKpICl2  
utUX5+fM9sUlaxRTYUCP9G0Qx8+1zoakqJ4K2gVp14txPszmKp5X0kgFJ20n  
lYM4X9LOzmhu0EyFE+xHzQsYN0PeYTXdVKD/vR1ijvXy5sff7mgapsKT5w5V  
FXgeNV9+bKGNUiGVwQ2xwvrYnZ75TgdS4XpPk+cAxhmm08X1TVJh5E5w5x+8  
b8w3JbnvsEqFlwaiytJ43mmz9ZLAJhVM2NcVRbE+9rYcqNplnwq030LLZjBu  
a91EWB7G9ke6itzD+nhRUrfhXtdUqNq6Vj5OHeezdZSPjSfm9wjliBnWyz5k  
pTQ7n1TlRctqmcc450XrA4cTqeC5iQi9gedtR0rQF6dTqcCJ7Pe3xvuUkP3q  
ZUeCUse/2q5mDOPjPcf9PSJTYWz4eeKMJp6fjvefHKPjeH2PtHqH57fBa7E1  
pxLxc/39LjlYj+cfORQUnJYKe612KWnieS86WNQSmZMKw/UWQucx/q47k4lu  
pMI6uuSB3xj3ss08F9WkwrfBPqdqjK3u+lm+f5wKsW7DFh4YPxhI03zUkgpq  
TkMLo/h8bdGapZe7UkF5a1SfKcZXdYbn4l6nQqn/Id0YbM9KF7Fhz+FUEPST  
98/A9iaxtJ6afkmFw5fPfgBhf5rXmBrqfUuFC9Pnun5i/wXuON5S/pEK07GL  
fh3E+Mzbs+lL/qaCRNh//wT/9/+GgakiM/Op0Bvz4q8V5vfjksKljwJp0D9j  
48zF/B/Wbnd7KpYGOQEEj37i+JjEr9ZIWJkGH6UuyB3BeqU5I2xEXy4NpEut  
madxvK2u9uR8WJcGrB208jicDx33dOz5Smmg/DBUMgfnj90TnjhSTQPHV5dX  
PMT7ZM/Lr48+q6fBpUVXUqZwvh36YBmeqZkGjNo1mpoYuwuSPn3XTw01n3/L  
23F+jlLc8y5sT4Mp/wLpzRj7rn9w0HJnGriftTyejfN7Qmu19G/jNFi4kxhL  
xjjAKKzxsllkaWHlQxfi434W66mz5tzcNBAP8bEpxv4s5+/Wyw4E0yDO1+fsL  
10vu326XmsA0cB277nQU11NNSN2K9bw0CBiUoIZj/KTr5yZKXhrsJwxDxPD7  
7Zs3GguUpsEP1bzcXoxfJbg5TD1Igz69qvA2fP7gWKbv0PM0YJos+fsC3/9p  
V3t057s0iDwqJv0c2zd1USj10bc0QGnGV29if/7+NSi8vZAG+75tLnXA/V7I  
MeB+vnQ6aETZrr6DsdeQqrDXpnQQTbHzssS48cSQzYY96SAvs5hTgc9zSeYN



Z9qmw6qqpTf/tz//LkPBlofS4axt80wevl/ld/b5Tz7pMBVEHfTA9tWvsNA4  
dCodakRqRquw/Y6Gv+ufhaSD2xXZcVGM2bF2o8XMdCiTmmrOwf1Gw6pvyW9u  
Ouju17s/gvtR59Kjqsbp6fD4kTRrE8arb/ie6L2cDufSFkEd7l/1wd+5CsXp  
UKx0MFAUYy+j4Fv+t9PBZfdDSUfc70p6YqeEHqbDjtx9UkK4H9peWiJr04zP  
Fyqr9sD98/dx7pbzz7E9h6+4tOD+mQmnc3C0Jx1Ud7asMcQYFp8L1RpIhx8m  
j1ZV4H7Mzii43zSeDmtX5bt34H7dubF0/sjfdJDON7KRx9gxZc+U0KoMkMtL  
b2Tj/j4wMzpSbJABRS+/pEbi5zGdbfnpxhnwgrP86mJ83robd4+etcyAcpN3  
qVcxfsQ4v/qYbQZ0NJe8OIHv9zxK67M9lAFZb391HcD2bmn9VbHbJQN2vVHp  
eoWx8LZjGYbuGcCwUJD2wP69uvImSMs7AzBpB5b/xvgaxcZ02TcDpLuu/E7H  
flSdfay1yj8DfuRZLEaYL8txPTI5MANuWpji7xh/ebKm7U9YBnQ7euUHYr6F  
b/Z/ux6VAVvpd2224Pjlp2VSDsdmwPnS63sW43x1cCcc61gZUMmKvHsPx/OU  
RXv4ycQMsBU5PjMk45+gmXBBnpcBY7VBwcdwftTPCw3TMjNAYg91ZBbnz+uR  
hyTd8xlwdShatgLn53RrtMpIbgZYao4sO47zb+P5Gb/dVzPgod9x5fu4Xs1o  
93gzRfj+NX4hB3F9ux4LvFN0MwN4gptVxjH00B+fEb+XAX2T5boLuB+0kryR  
f00G1GzlePzC/WLxy3dxHY8z4FDv5tbnuJ/o5Ts91W7JgJcdGsXk3G90nOqS  
Su/E96+XKtqyAfcPiaZzTu8xPx3s+G14vhgVVSvKfcd8f+hX+IDxbTLn3FlI  
E0LXppzYg/uXYqiTILR2JvwOs0yk4edvNz40TzDOhPuvuH7P8HkZ71Tilthl  
go7encrP+L59qbzaOI9MuBp1Ku0btmfj7pnfC6cz4VBGxIYRb0//ASjrxBI=

"}],

{RGBColor[0.880722, 0.611041, 0.142051], AbsoluteThickness[1.6], Opacity[1.],  
LineBox[CompressedData["

1:eJwVk3k81lkbx2fLkcqx2mJcpZX7nHXkaj5TVrW7SkJbP2mM+xpmxpflmdzJ

bZZyRGlFkiIjZV0pKdHSEiaVogMhR2h3fn88r+f1/uN5Xs/zfj6PMiPAzn0N  
iUTKFcT/s8Xs888sSRI1+i+7YOefXan8tLHqj8HD1Ie6u3Yl9QBRDxQ5lcGf  
qAcnag7lrbVFgtsb68+y81QneQUX2htHdL8xtT8bvEoN+JRtG6ZwHck1HdWb  
fNagUri9TN3ZBdfZbJNRWRG8ZCj4qk644hlF8V5VhxlOL7X03DfywMJMh1V4  
sDhoDwaHl/d7IfUob+xSphTm/RjLO7R8UMSTKN/gI42M+91+20d8cYPs5sem  
/QCbnUPj3j6ozWUpzcguvV60fsmjuZ6BuQmKV0y+BBjj7RTgQ70zd6so6  
yPBUrvDZxg3EUh4vVLxIHp0VGw2s5VjY8FXCMihYEY9T3U1b0llQOOZGemGz  
FQubo850LrMgMzw0Wpy5DT8TheLBTmxsS03YYx+pjLv37u9svsmGhiXlsqjP  
dnQznoZmrOGA8mlI5I7Dj7i/kONdu58D84IELyZNBfvNL71/l8SBIQ2IU1ln  
B+LmM8d6WzmmWR3S6pNVxZQv/XfJRQ4cryWkJgqpoZ354JKaWhBOHKdMmU+r  
wcMu7XzeoSB4iQ/bTr1Qx8FfExp7Q4LAuptQU9KhAZVk09dW+UEI86f84HhT  
E2/bRvpovCDEKq4TYkVaGKp+Ya3cF4SzjxOeNyZrI+h5/Wa9ySDkRFBMA4N1  
cEBmL7VaiEChznD+jwxdsAulxl7JEigbTljpt9FD08cko381CfxjTdZrV9DH  
cp6t9U5zAkOFk/zCTH2kflsn17ifwMv51vST6wzg/NL711uOBMYO5NHsIg3Q  
VEirsGYQeF/GnNGaM0D21OaDOX4EJr/tKRX2ocC7pmxtE0FgxpFsz+dT4BRR  
9YgfQWChalKI5/ATChoTXknFEVgRaavNfPQTRLIOy3inECCdyPPwoxnkvY  
2mo6AaHbTBnr24a48LG4lZ9DQezS6sFWHSPknj8opxPQMKTHTLpUYgRq78nS  
3gIC0k2TGs9kjWGiUEcmXSSwRaZtsPKcMeRHiZq6UgLyAXkp8UImuHvU4PF3  
ZQS2dTAt6GEmWOonl3+4QkBlq9Un02kTJNY/TYwoj6AeQi7c5LETGk4W/zRd  
JaDTPXng04udELee0mmoIEBRa/v3/iFTVF3e586pJGAclVdd3GGK+PHqhs8C  
NnvOdAmzNIOl8q0us2sEqHpW0vY3zRDkr3j9sICtEsitOhrmiAoXI9EEvI8/  
yREtMke/d9u4ilB/M2lTgf3BAhvIW7TKBf0OpeX1NSRbYO7cEUMtATu+Y8Zn  
kyyxacVLJl0wzzGqlQkz2BK1SsUFg4J5dRM0Cw3mLaHT0SeyLNhnTbeU8Bdi

F7xnPO3WCLh/y4Jv/Zdd+NjeJTsr2L/Cebj3FEHFrZKk692C+0SXtZpSv1Ch  
KGGsl3+ZgOaCvW2MGZCdXRNif4nAt13mt60agDFS3Uyh4N7jjCof1a8Av/3J  
Wkoxgd54ZaV1ZjSsevEuNhQSuPJENO4RjwaZB6T26vMEbJ3/trPj7YaceXvT  
PoG+Zqf3ihgu7QYn45XpxSyBHmUNvM2me1BqOej1JYPA0qfibQP1e5B1M7wy  
8xyBkgj/yRP1Vpg59+zd1QQCcxdkv1vW2NteeQvSaEEzOV8F0tvHoDYnPgE  
NAT6FJ5bTX/iiEfiiyUjAv/E30nrH1F0xt2XYiN/BQTh/fuD694IuyKU+Lqi  
vzYIX2m9kwo8D+w4MffbeBEHyTJDcaV3flBDibGnjDkwmuUlsiqYODTOnFXu  
YcN9Y9L7Zi0WUK9iFxbERuDI4jhlGwPlTkkxYWk2Avp2bLQSFvxNz8H+udss  
hHdbjPGeB8PU5OnKcRcWHiZyc/t7TmJh+oPRfmEW1nte99t8NQwmfxKrm28E  
IkVog/xyeTgu6G6Qv3IkEHKXbaPOFEfCYSZk/bXvAnGgVkpOD7NoaM5lqGt7  
BOD6Qpdh884YjNC+jJCbmeJuehKyvOM0DF4U5/+qyoRwzlyqmFostN1+H5c6  
4w9Rkw03vH48A707s7Xy436ljTptMyARh6vPPCvOHPVD0RV5R0WJeOyWj5cQ  
afGFEWMTi70Sj5G5v6gBjr6wUyJ5kt8mgLRTe1q/xgeSDRIPs14nlutzljd0  
xQfW46cstz5NguxbfsxCiTcU59crRT5NxipfwoJB9sYp4bQB3a4UhLrW2Srl  
eOHwFdaV6bqz4BeFLxgqeOGRvBoXG0qMjrF7GvPe+KexYCOduk5HGUE9VW  
9YSJnYGdytk0WNngJu2jVeuDPUoe5EKt0LMpFZq9YeID9jrbXoyEdRL5rgmy3  
u8BXVntdZhn4TimE73TMHa+5vq8Kb2Qg4gK9Mn3KDZE50ow/VTNRuHtm4+tE  
N0yc7uSev5yJRuVkmUZ5N2TwbjjKKGThgqd+4PhtV4i9LH8UfiELBpq6gxM2  
rgJ/K+imyGUjZjyvLzTOQGPIpfl29GwIbd1b9SKZAaHfWXdkJH0wIXZQla/G  
QFLM4bcV8TIYV2Bwyu6xC3q1qr8dX87B1KLD/J5gF3xoV3y8FJqLnmeT6Tfl  
LqCVN6goTefig20pb307HfVFopU6M7mYnmgoY26lQz/X/ifLuVwoysU4KbXQ  
oRQ7SXNaziUIqT+G0kTHV6ftj/JJXERuTznsxKOjRio5b8v3XNxsr5Squ0aH  
ysmjEpIULn4rURYjyaXjPLMsR8mQi1T1oWuSOXRlu88q6BpzEWE9WICQRQfj

LlXLxoyLMLFbI7x0Ooa1mvel70bi2Eft17PjdOTy1WNFDwtYY37OP4o08X5i  
vYwDF6GVXR2rEXSc6WrJUD3CRXJHY0NqOB1snlPxz//jli1uhFQVSseBrPS7  
sa5cFLsMiE9z6GhPGrbKcufi3hud0Wg2HRbRml0lnlxMRcX9/T2LDk3/tsFm  
Xy7+uEeRN2TScdH1e0aPPxfkltPMdj86ZI85T7wMENQXdl46+tKRblsROM3i  
CnQQJca96RDdu7jwL4eL6Aj9TAvoV4D83NHTg==

"}}},

{RGBColor[0.560181, 0.691569, 0.194885], AbsoluteThickness[1.6], Opacity[1.],  
LineBox[CompressedData["

1:eJwVz2k8lAkAx/HZYpVzG8WEwU5SUKLrXDz/YUKH0nRLtTtESTJkkMkxT5Hc  
NPOsakeSWzU6dxAppaKDXWVaky2lUrKXm2zbvvh9vq9/3/P2c3dNo9Fo07/2  
vy4jT4f40jSChpxhzbZ21+6s17IPAiURZu/u47g8k0i4y4ysEnwkRAEDBXdX  
nSNSA195DjHGifPGmlcC+qxIR6+cNqQLpogacsxGjmwH0i42y3RDpuFNcZce  
0fYHcSEiwuEF41vc8eCL7XWVxO+2zPrzzTORuW28TrqshxgfbuYIBVp4RA+z  
Ttn6lsjYKn99Nvc7SH0vSyMHPHIFcu1yjRA65lR8E8T9e4i4FStfqmDoQey7  
x3V/1ATRodAeIQb1sbSRPitvYJJ44xR4taR5LjpsdDtEaV8lJU/argcETFiI  
WUK1zOkw8guk/eljAkH6JCvliCr0lV0vTuaeom4dp9v7qBosXG2L1UJYeHCc  
UeNbbQGfqs7LDoY5uKtk1w4soEN8yNYpXLAEd65IBZvZhpAuUZ6Yx7NChcUz  
37S9RihRpnx+4rMU28ZK7B5KmOiS9ndLc63xrNZAT3fQBP3/ehSphtjCRmZb  
l72RBXpDv8XvDHvY6Xbyag0WwI/g0IQJXOHctDK3YIs1fjTY01F0aQ2CWpk7  
ObHusJdmTmU/3ATxpekzVveuQnJt1pPnzB1QDoT5msZx0de3dsYr1QA8E31o  
4a7ejE/s9n4jeRCChnS0m17ehmP6XUeKakMQBROHTuufYDciP8qvDEN1ufHo  
wXAedmmm9jVa8vHB++Kc2vhAhD+feMu3iATX+JPn0Lkg7O+Yr8lRjcIKIoAb  
e243hI9cXsufCsAcijbzzA/BvaOU5ElbDPwmEm04Z0OhHnwhdE7FQawzLDRP  
EIUhTUXDcLJciDHHzkNORDgMin0TDp+Oh9dStzLeMj7WXLfQ+cU5EXPgwsuh

R+DCeOsPjY5J8MoYeN7yJQLHWh9GT84XQZBYfbupMxKqScPmMxeQcGI+Z5k0  
HICag0b17nmHseePG49zTkWBTBD5KLSPwM6nePXMAYAEKSg03MbWTUWU0N3++  
WzTseLr8iM/JUNeZauifFvP1kxY8tzcF0/2Z9aY3YqBTo30vr+conHZ3Za5I  
jYXn2zhXk8epUDcubHdjHwRzTN04/vExTDdNXnVCJQ5xqlkKq9Y0eD5YeWP3  
jTisL+WXD15Nx8rbzgaMUCFaFgpeHLmSAbM/7/tlsA6h3kWxZHFRJraEtrXz  
7x2CA9dmo1l6FrS64t1798SjrGjjaDQnG4XehfL02QmleMP2CqrJRxDkZZE  
lgBNQ8LXzTkHCheGh6VlInqovS+l1TlozlCpnxIkll5M55WZ5+Kfl2lkT0Mi  
3onuUyeLc5HXN/bxZ60k5MirN+kb5eEmciPZG5Iw86/yFuGpPCw3sR9NKkgC  
J8XIKs3g00JG6m4q3iShLrp+Liv70KoevvacshBBZQu/9oyOGIsZebM44SKk  
Jq3vrUwWo6mhk58hE6HdUvbw9kkxRFyVaf79Iry/zXzwT6wE9OuDw7OtSbDL  
a8yMByWQlOYHW4WS+K1ArWrJsASV47cMHPeRsJZsWOY6KkG/R9NVdhgJY7Kf  
7T8hwakHa8o3hJP45M/aeYJGwTTzVkzsARIXvzuWrzeLQp3a+5v1QhJmMVu1  
dWwpdH+2pDtmkDgZViI2/oHCfNvRHrdMEvRdI0ZW9hRqvduy7NI0LgZlj70  
FGL10h9xc0goLRu909wpNBi5m4SKSUi6F5Jq6ynwGGujTvxKQutJlLr+Rgov  
pwIVBVISh1tv5phvpuBxTWZeXEAIQu5/evk2CqvPDAkvFJJYk5d9nQygMMZe  
x7hVTOJ2qpKTt4vC5/M+d5pLSLgkLmo9E0xh0bus7a2lJBbta3rWuJdCeeNH  
r45yEoUBs3ht+yis3KF1UlFBguG3491f+ynUNB18qqwkke1bGT7Ip/D9qMPU  
iyoSal4T418iKZS999TsPUfiPxNtum8=

"]]]]},

AspectRatio->0.6180339887498948,

Axes->{True, True},

AxesLabel->{None, None},

AxesOrigin->{0, 0},

```

DisplayFunction->Identity,

Frame->{{False, False}, {False, False}},

FrameLabel->{{None, None}, {None, None}},

FrameTicks->{{Automatic, Automatic}, {Automatic, Automatic}},

GridLines->{None, None},

GridLinesStyle->Directive[GrayLevel[0.5, 0.4]],

Method->{},

PlotRange->{{0, 1649.97395}, {0, 976.5163393}},

PlotRangeClipping->True,

PlotRangePadding->{{Scaled[0.02], Scaled[0.02]}, {Scaled[0.02], Scaled[0.05]}},

Ticks->{Automatic, Automatic}] \) \!\(\(*

GraphicsBox[{{},

{RGBColor[0.368417, 0.506779, 0.709798], PointSize[0.6], AbsoluteThickness[1.6],
EdgeForm[{{GrayLevel[0], Opacity[0.3]}]},

{RGBColor[0.368417, 0.506779, 0.709798], PointSize[0.6], AbsoluteThickness[1.6],
EdgeForm[{{GrayLevel[0], Opacity[0.3]}]}, PointBox[NCache[{{Scaled[{{Rational[1, 2],
Rational[1, 2]}]}, {Scaled[{{0.5, 0.5}}]}]}]}},

AspectRatio->Full,

BaselinePosition->(Scaled[0.1] -> Baseline),

ImagePadding->Automatic,

ImageSize->{10, 10},

PlotRangePadding->None] \)      blood

\!\(\(*

GraphicsBox[{{},

```

{RGBColor[0.880722, 0.611041, 0.142051], PointSize[0.6], AbsoluteThickness[1.6],  
EdgeForm[{GrayLevel[0], Opacity[0.3]}],

{RGBColor[0.880722, 0.611041, 0.142051], PointSize[0.6], AbsoluteThickness[1.6],  
EdgeForm[{GrayLevel[0], Opacity[0.3]}], PointBox[NCache[{Scaled[{Rational[1, 2],  
Rational[1, 2]}]}, {Scaled[{0.5, 0.5}]}]}]}},

AspectRatio->Full,

BaselinePosition->(Scaled[0.1] -> Baseline),

ImagePadding->Automatic,

ImageSize->{10, 10},

PlotRangePadding->None]) liver

\\(\(\*

GraphicsBox[{{},

{RGBColor[0.560181, 0.691569, 0.194885], PointSize[0.6], AbsoluteThickness[1.6],  
EdgeForm[{GrayLevel[0], Opacity[0.3]}],

{RGBColor[0.560181, 0.691569, 0.194885], PointSize[0.6], AbsoluteThickness[1.6],  
EdgeForm[{GrayLevel[0], Opacity[0.3]}], PointBox[NCache[{Scaled[{Rational[1, 2],  
Rational[1, 2]}]}, {Scaled[{0.5, 0.5}]}]}]}},

AspectRatio->Full,

BaselinePosition->(Scaled[0.1] -> Baseline),

ImagePadding->Automatic,

ImageSize->{10, 10},

PlotRangePadding->None]) gi

```
(*-----Next Mouse -----  
-----*)
```

```
vn=readTac["C:\\Users\\exx\\Downloads\\OmeM4, liver 1.971875, GI 0.339625,  
ID 3848 delayed injection.csv"];
```

```
Lv=1.971875;
```

```
Gv=0.339625;
```

```
id=3848;
```

```
vn[[1]][[1]]
```

```
{{10,0.00658221},{30,0.000487},{50,0.0000329},{70,0.000408},{90,0},{110,0.0007  
96},{130,0.000287},{150,0.000196},{170,32.9398},{190,9.1852},{210,1.95757},{23  
0,1.67563},{250,1.00066},{270,0.838545},{290,1.134},{330,0.777639},{390,0.7304  
73},{450,0.937449},{510,0.890491},{570,0.874564},{750,0.79645},{1050,0.575153  
},{1350,0.470015},{1650.04,0.391732}}
```

```
model= mouseModel[Lv,Gv,id,27]
```

```
ParametricFunction[\\!(\\*
```

```
GraphicsBox[RasterBox[{{179, 179, 179, 179, 179, 179, 179, 179, 179, 179, 179,  
179}, {179, 180, 180, 180, 179, 179, 179, 179, 179, 179, 179}, {179, 179, 180,  
179, 179, 248, 248, 178, 179, 179, 179, 179}, {179, 179, 180, 179, 179, 253, 248,  
179, 179, 179, 179, 179}, {179, 179, 179, 179, 179, 248, 248, 179, 179, 179, 179,  
179}, {179, 179, 248, 248, 248, 248, 248, 248, 248, 179, 179}, {179, 179, 248,  
248, 248, 248, 248, 248, 248, 179, 179}, {179, 179, 179, 179, 179, 248, 248,  
179, 179, 179, 179, 179}, {179, 180, 179, 179, 179, 252, 248, 179, 178, 179, 180,  
179}, {179, 180, 180, 179, 179, 248, 248, 179, 180, 180, 180, 179}, {179, 179, 179,  
179, 179, 179, 179, 179, 179, 179}, {179, 179, 179, 179, 179, 179, 179,  
179, 179, 179, 179, 179}}, {{0, 0}, {12, 12}}, {0, 255},
```

```
ColorFunction->GrayLevel],
```

```
BaselinePosition->Bottom,
```

```
ImageSize->{12, 12},
```



PlotRange->{{0, 12}, {0, 12}}\)\ \!\(\\*

GraphicsBox[{{}, {},

{GrayLevel[0.55], AbsoluteThickness[1.5], Opacity[1.],  
LineBox[{{9.09090909090909\*^-8, 9.090909090884856\*^-8},  
{0.0874367476365131, 0.08197166587636243}, {0.18222810297558026`,  
0.1358255024317191}, {0.27073779576926765`, 0.13315455086535802`},  
{0.3575112797365835, 0.08143316377978886}, {0.4516394623155443, -  
0.007347854733426912}, {0.5394859823491253, -0.08816932746972758},  
{0.6346872009943513, -0.13787329990112937`}, {0.7281522108132057, -  
0.12816574147938434`}, {0.8153355580866803, -0.07001063326902106},  
{0.9098736039718, 0.02121659675083076}, {0.9999999090909091,  
0.10024804094746914`}}}],

{GrayLevel[0.55], AbsoluteThickness[1.5], Opacity[1.],  
LineBox[{{9.09090909090909\*^-8, 9.090909090880112\*^-8},  
{0.0874367476365131, 0.08090369567458766}, {0.18222810297558026`,  
0.12746559200130417`}, {0.27073779576926765`, 0.1116266937044405},  
{0.3575112797365835, 0.046963725126600256`}, {0.4516394623155443, -  
0.04509050859182233}, {0.5394859823491253, -0.11115559892361665`},  
{0.6346872009943513, -0.12642564594664163`}, {0.7281522108132057, -  
0.07740196037964171}, {0.8153355580866803, 0.004179083230780074},  
{0.9098736039718, 0.08937493944143977}, {0.9999999090909091,  
0.12834702174618903`}}}],

{GrayLevel[0.55], AbsoluteThickness[1.5], Opacity[1.],  
LineBox[{{9.09090909090909\*^-8, 9.090909090875369\*^-8},  
{0.0874367476365131, 0.07984396759533968}, {0.18222810297558026`,  
0.11939549826670079`}, {0.27073779576926765`, 0.09184904274707059},  
{0.3575112797365835, 0.017913117173780694`}, {0.4516394623155443, -  
0.07109962300031061}, {0.5394859823491253, -0.11717052830989395`},  
{0.6346872009943513, -0.09879571259704382}, {0.7281522108132057, -  
0.022693471356141894`}, {0.8153355580866803, 0.06128703302641453},  
{0.9098736039718, 0.11605625481609519`}, {0.9999999090909091,  
0.10415981267620744`}}}],

{GrayLevel[0.55], AbsoluteThickness[1.5], Opacity[1.],  
LineBox[{{9.09090909090909\*^-8, 9.090909090870287\*^-8},  
{0.0874367476365131, 0.07879243663407876}, {0.18222810297558026`,  
0.1116081822210312}, {0.27073779576926765`, 0.07372482040530459},  
{0.3575112797365835, -0.006267252216927747}, {0.4516394623155443, -  
0.08743897872291118}, {0.5394859823491253, -0.11109134853087661`},  
{0.6346872009943513, -0.06371549528296311}, {0.7281522108132057,  
0.02544576624054603}, {0.8153355580866803, 0.09464282937855747},

{0.9098736039718, 0.10731931496853601`}, {0.9999999090909091, 0.0516787429232188}}}],

{GrayLevel[0.55], AbsoluteThickness[1.5], Opacity[1.],  
LineBox[{{9.09090909090909\*^-8, 9.090909090865543\*^-8},  
{0.0874367476365131, 0.07774905743802465}, {0.18222810297558026`,  
0.10409673959866513`}, {0.27073779576926765`, 0.05716133039337165},  
{0.3575112797365835, -0.026084496726167965`}, {0.4516394623155443, -  
0.09591154799603378}, {0.5394859823491253, -0.09685594593277226},  
{0.6346872009943513, -0.02730376120671303}, {0.7281522108132057,  
0.061646715198529656`}, {0.8153355580866803, 0.1046634148537508},  
{0.9098736039718, 0.07509702498429204}, {0.9999999090909091, -  
0.006536873471333553}}}],

{GrayLevel[0.55], AbsoluteThickness[1.5], Opacity[1.],  
LineBox[{{9.09090909090909\*^-8, 9.0909090908608\*^-8},  
{0.0874367476365131, 0.07671378556951527}, {0.18222810297558026`,  
0.09685439581479163}, {0.27073779576926765`, 0.042069810325321415`},  
{0.3575112797365835, -0.042006785469922474`}, {0.4516394623155443, -  
0.09808544986431629}, {0.5394859823491253, -0.07760167026270944},  
{0.6346872009943513, 0.0063643674428021085`}, {0.7281522108132057,  
0.08405712128907425}, {0.8153355580866803, 0.09555213349985489},  
{0.9098736039718, 0.03202960165577907}, {0.9999999090909091, -  
0.054402034659985464`}}}],

AspectRatio->1,

Axes->{False, False},

AxesLabel->{None, None},

AxesOrigin->{0, 0},

Background->GrayLevel[0.93],

BaseStyle->{FontFamily -> "Arial"},

DisplayFunction->Identity,

Frame->{{True, True}, {True, True}},

FrameLabel->{{None, None}, {None, None}},

FrameStyle->Directive[Thickness[Tiny], GrayLevel[0.7]],

FrameTicks->{{None, None}, {None, None}},

GridLines->{None, None},  
 GridLinesStyle->Directive[GrayLevel[0.5, 0.4]],  
 ImageSize->{Automatic, 28.4375},  
 LabelStyle->{FontFamily -> "Arial"},  
 Method->{"ScalingFunctions" -> None},  
 PlotRange->{All, All},  
 PlotRangeClipping->True,  
 PlotRangePadding->{Automatic, Automatic},  
 Ticks->{Automatic, Automatic}] \) Expression: {Bl,Li,G}  
 Parameters: {k1,k2,k3,k4,k5,k6}

]

Manipulate[Show[ListPlot[vn[[1]],PlotRange->Full,PlotLegends->{"blood","liver","gi"}],Plot[Through[model[k1,k2,k3,k4,k5,k6][t]],{t,0,1500},PlotRange->Full,PlotLegends->{"Blood","Liver","Gi"}]],{k1,0.001`0.2`},{k2,0.0001`0.1`},{k3,1.`\*^-6,0.01`},{k4,0.001`0.2`},{k5,0.0001`0.01`},{k6,0.0001,0.01}]

Manipulate[Show[ListPlot[vn[[1]], PlotRange -> Full,  
 PlotLegends -> {"blood", "liver", "gi"}],  
 Plot[Through[model[k1, k2, k3, k4, k5, k6][t]], {t, 0, 1500},  
 PlotRange -> Full, PlotLegends -> {"Blood", "Liver", "Gi"}]],  
 {k1, 0.001, 0.2}, {k2, 0.0001, 0.1}, {k3, 1.\*^-6, 0.01}, {k4, 0.001, 0.2},  
 {k5, 0.0001, 0.01}, {k6, 0.0001, 0.01}]

```
Clear[newmodel]
```

```
newmodel[k1_,k2_,k3_,k4_,k5_,k6_][i_,t_]:=Through[model[k1,k2,k3,k4,k5,k6][t],List][[i]]/;And@@NumericQ/@{k1,k2,k3,k4,k5,k6,i,t};
```

```
fit2=NonlinearModelFit[vn[[2]],{newmodel[k1,k2,k3,k4,k5,k6][i,t],{k1>=0},{k2>0},{k3>=0},{k4>=0},{k5>=0},{k6>=0}},{{k1,0.008`},{k2,0.0001`},{k3,0.0014`},{k4,0.001`},{k5,0.008`},{k6,0.0001}},{i,t}]
```

```
FittedModel[newmodel[0.0100912,5.86338*10^-13,<<22>>,<<23>>,0.637196,5.86338*10^-13][i,t]]
```

```
{fit2["AdjustedRSquared"],fit2["AIC"]}
```

FittedModel::constr: The property values {AIC} assume an unconstrained model. The results for these properties may not be valid, particularly if the fitted parameters are near a constraint boundary. >>

```
{0.635333,637.05}
```

```
fit2["ParameterTable"]
```

FittedModel::constr: The property values {ParameterTable} assume an unconstrained model. The results for these properties may not be valid, particularly if the fitted parameters are near a constraint boundary. >>

|    | Estimate       | Standard Error | t-Statistic    | P-Value   |
|----|----------------|----------------|----------------|-----------|
| k1 | 0.0100912      | 0.0132183      | 0.763425       | 0.44793   |
| k2 | 5.86338*10^-13 | 0.000605474    | 9.68394*10^-10 | 1         |
| k3 | 0.00046763     | 0.000223525    | 2.09207        | 0.0402831 |
| k4 | 5.86338*10^-13 | 0.000449281    | 1.30506*10^-9  | 1         |
| k5 | 0.637196       | 0.824696       | 0.772644       | 0.442491  |
| k6 | 5.86338*10^-13 | 0.000626781    | 9.35475*10^-10 | 1         |

```
Show[ListPlot[vn[[1]],PlotRange->Full,PlotLegends-  
>{"blood","liver","gi"}],Plot[{fit2[1,t],fit2[2,t],fit2[3,t]},{t,0,1501},PlotRange->Full]  
]
```

```
\!\(\*
```

```
GraphicsBox[{{}, {},
```

```
{RGBColor[0.368417, 0.506779, 0.709798], PointSize[0.016666666666666666`],  
AbsoluteThickness[1.6], PointBox[CompressedData["
```

```
1:eJxTTMoPSmViYGCQAGIQDQEqDnc1bsz9/LXKHsK3c3ghtkuo8ZU9lO/psMgu
```

```
L+WwPSOE3xDoMPOT4gqpVZQfpgDAzJoiHYIun7rd4ioF0TelcEh8Kv2XP7z
```

```
RhD+gSSHA5PF9FZv0ITKpzqcO8un7FXhADHnQLqDsprs+0txShC+Q5bDrCCB
```

```
OQZB/6H6cxx2/HUUiD//C6o/30E7/AbnDqYPEP6DAgebB9aPo6++gvAVihyE
```

```
wvYduqvyCcJfUOLgNvdsdvajFxB+QoWD8xy1V+wJz6Hqaxy0l63pmPr/LdS8
```

```
eocVJQ/Mn9W9gfAvNDqwaK15k/PnNYRf0O5wK8I9tqXmJYSfMcHh3H/n1cvT
```

```
H0H4ElMdh7N5dspsc9+gZT+XZUTMx3KxY1mKwvdtAcAQ9h3MA==
```

```
"]}],
```

```
{RGBColor[0.880722, 0.611041, 0.142051], PointSize[0.016666666666666666`],  
AbsoluteThickness[1.6], PointBox[CompressedData["
```

```
1:eJxTTMoPSmViYGCQAGIQDQEqDg88It9IKTTaQ/h2Dict3Da5r/CE8j0dQp4I
```

```
FBZrSUL4DYE0X/s4n3NaCUD5YQ6KTHwLvc7aQfnRDt/7W18IWChB+A4JDgzI
```

```
4ECSw57Kvc55bdJQ+VQH5m2N6qLJCDqDqQ7xDnx/ohvNYbwHbIcHs5Ynn1F
```

```
1Roqn+Pgs4aDb5afHVQ+32GJVumjq+cdIPwHBQ43CtQebGt0hPAVihxqvlu5
```

```
vlU5QfgLShxuTBdsTpV1gfATKhziX95fFNga5SvUOMjY5daqMbpCzat3kFZj
```

```
ZHd4BOVfaHRYoaIqU/fPDclvaHfIFDBg8eqEymdMcLh57fQxU0eofRJTHW7J
```

```
TtFIumfvsEBK/67KiZkOKl4SkSU9Ng4A8UpmSA==
```

```
"]}],
```

{RGBColor[0.560181, 0.691569, 0.194885], PointSize[0.016666666666666666'], AbsoluteThickness[1.6], PointBox[CompressedData["

1:e]xTTMoPSmViYGCQAGIQDQEqDgwowM5hEfPrjO37Eu0hfE9U+YZANH4YGj8a  
le+QgMo/klQmn+qgy7rtwWkfCYj4gXSHVLH/njxSUL5DlkPxnzMGCr08UPkc  
hw9tb0OevBWAyuc7XLqgsIVdjA/Cf1DgUCJQpyb3mBfCVyhymHVvZ8fIRKj6  
BSUOx/VmTDr4iQvCT6hweMg6a9bxi6JQ9TUOc1T1Xn+cKwU1r96B971GyxEh  
LQj/QqPD7LZ+1f9XoeFW007wy/qxSIOjNYSfMcHB67qL78UvoRC+xFSHmS1p  
Rt9fjDgskNK/q3JipsOTeeve3QhKdgAAa+xcyQ==

"]}], {}, {}, {}, {}.

{RGBColor[0.368417, 0.506779, 0.709798], AbsoluteThickness[1.6], Opacity[1.], LineBox[CompressedData["

1:e]wUV3c81t8XR4iEkkRRkmTENyor93HIzl7Z2XvvPR6bKCpSshOSrGdQj1Ai  
pEhkjHsnlaLk9/n99Xmd1/2ce88959z3eb9P23rp09BQUVFp0FJR/f8rtz74  
04eVSt7oGF/Fk1PZ803WTPVy4Ff5RMLNxyCcAVEdPH6Vgd/ln7tvSX4JS4ZE  
+2mVn5yb8mP/WgyaF/HwYVrG8GbgrrvzLisefao+GQ2pte/URVxo4rl/Nu3/I  
H577+kpNcNLDqQcBp2PXPeGTBE9TVTsj9Gf/1n+17Qhba+1K4YHMsE1SpeJh  
sYE004aZksxDYBJ8I+uwvinkN7CUM7myQcRaSAulSx9quOzdfRXYybdczr98  
7hq8Dmn4b4iTA47aLIgOE5Xg8xDLuvzqMdB19xxvb8bBnlw9sbSdCxSkLj3n  
6JeE7ZyGEOb8E2B0oPeB4NoFYNphQf6BPLDvUcjObUEh4DazpxrROgW71Vo/  
Vyr54NjX0YmCTF64Ztbgs9xwAnjTEq8aRp6G9+HNDrN32UEISTze78oH8Rlp  
HTfSWUDI+yj9C6MzwH43v+1pFT1ceZTo7KnAD4V9NfS2A1SgpCXReVr0LGT9  
5LYz3Pstr7U7KvKZUwDE33c+0k9fkzd+lpWRHsOtCt02obeXJK/YSnx48rq  
ORDuDj4n7Dct78z8VffHiCCEDlspa1iMyftQEmuL2oXg/n9F2uHJA/KhHhLs  
xnXC0KHT8Odt40f5WJ6vAYz5IvDvUnCp6UCH/M33iYMvU87D59JXofNerfL3

liRkvANFweXcqLnWjRfyeaJfH5yxFYM9s+APJXr18qVfE/80aP0H/xalPuOF  
q+S/qHD918Z9AepMkU2Kfan8aN7Kt7zMC2D0/dqyeX6B/Pjm69vBDOKw18V7  
r+DZffkZ7RwF/Uhx6I67HFollym/WOq5JrIhDi0cweLeEqnyK/+uFt05SsB6  
13ddowtx8mvGXlbfvklAhtHpH6zbEfjbVSu0DUYXQWQ6tGBAPID+L/0bQmbX  
RXClcV88HuctT3Ujx9Fd4RLIWjwyFIp3lqcleR5TIV2CuhLHgrKLtvKMrEod  
p0QvAxvqmflCZy7P4sQVsl10GTlahEylWA3l2V6tCH3illSqMU05n+1a8hzH  
3gxXpkuCld3qnMkJFfkTXjimpCbRSYBtyK3XPGeR52z3lrEOlgNy2ErVkIS3P  
f0rpu8yqFOQRSurbj0rICwZx5R1xllb7+i9Z0oaE5UU/rGh/H5GGjuNvvQxX  
zshLnHuz91ZPBgK5pWcYs3nkJaNyqgvaZYDbffL9ma2j8rKDnjahSBbUFF7T  
SGofkpf/T4nNsE4WipfprYUvM8grJXK9FhW6AklC4lTKv6nl1b6t+O3PvwK+  
lG5P0rMdnKbUG/4JdjkoKn04SdOzjt07lf05MUUOmux8TRcdv+OM5zwT7llh  
+M504P7RTzM4M3klKc9ABC/fl9NpXhzHiSUK54lvlih1SjGq8x/E0Xw4RPcr  
AAfK/SuqizsfcQMcW27kXzi4riCgSbrXgXtq9bUvLEAeFP6lV690t+CiS1/L  
yP+SB1cjeyNCcwNOeMtQN0YWIP+KSmJRUS20/UTHPrTQANZfcBHtVuD+4a6Q  
lBoBZC79KMxOL8bN21a5CuwAmBWvuykb5eL6Ek6fZJBVgK9n9117GX8X97Li  
bu9CiAJYHDdYqG5Lwz3p2R/f1aAAGpL76WUK43GZa6HSz7YVAOSmM5K9onDh  
HCtL6TKKkJUxt679LBDnKGuT7x2iCCqDwu+XrnnjdK369fUbFOFoS+bvGXsn  
nCxelf7StilcuDW19vq1NY6/tLHhqMxV4N6w+Ds1dx3H0inqsRV8FdbIIoc5  
DfVw298LeIfIV+GbX8F5Gx113PRh9v7G31fB7X5nai9ZEddzOTExV1ojXhZt  
2iqQruDIpjuycFKYLTP90qT9yVcUYTHyg2yEpxg0r/bjiOGu1k4XqjwWwkC  
fc5k2qsI4ALbDIzOSCvDScvQkfFoXpz1wlsGumBl+OMZZlpqx4m7xiz7cpak  
DGFhb60jhNhwwkuLPvDq2lOFNFM3QiDsTjteI90yFlAocUXh27AKFDncg5M5A  
apAKEGXTIrau7sNt5NKneJBUIjx2g36xch9urDkE6WypQLGtqFvaKi2uY3p5

9YKUKpiFWeptEuhxtQzWJWxBqlCsHdfAv8uAe3T+0/UNoircqHp6k8uHCZek  
q8I0sKkK4Y/u0Gp+Oojz9W9oIkmqwc/79SvWdMw4i/vnfXMC1aC9gOWayf6D  
OJWX+WfDiGogVvv64ugWI+7CONuQxaYa/BMmGonR78cdp024iZNUB5NLTvm6  
tPtwtlLb8ryB6vDoNFuvRcwf900a+zo1UR0s/I9mn5xfQcNe30qnfqmDNe2o  
jxbDR/Tmjz5Z22UNYE3oK7ztOEipIrUxPwnQgNtdj9RstRcp90ekW5IIGsDI  
o088mvyTgt976u/6SwPUaR1/x9SsUdzPnBLUvHwNSM92dSfYVinGppkjogHX  
IHJwvrP2+hRFwY3uFivhGswNR/OwsA5Qzt8KVvy5cQ12ia8uxiv2UTjqln71  
XdKEntStlencfAxSqQavyen9NeKvflZw99o2yuNNrkVWvCXUXo5j3609T+k8q  
Hwre0ITNgzqj8WGzlcZF8mvTS1pQPvZft6c4TSlzFam64q8FbHr7M5IPjFly  
U/KEeeq1oEBKOEhNsI8SXnV47N+6FnwT3vd17ncbxbEvLmP8ojYEvohS2DtC  
puhubim1+mnDjkJT9d6/x5Qrx91+F9dpAwPF/9R+m3jKm8mAVfUf2lByquxV  
xKc4pPk0ev6HsA6EHdWXcCjORZ/9UsvOepAAQ8n+6HKp8hKLuvLlSIdEP/N  
tZ7jTkjztIUfj77qQMMRM53wiy2IPGs0/fqgLiypPsXekv8W/dUwH88S1gWd  
nTQjDekupPDcetRFTRcavU1Oq8r2oIQjl/kHHWh2ORC/OxkD+oMcutnjdOF  
7vj29Ote3Yhl1PvjZKEuBNzxOWup04H0IbCb8EoXno95fR+YaENZJWEdSV91  
wUzpet+ljjdohCHmjfkfXzhR9a1tufUG8XokNItx6UGLO5N7R9sbZN+b+pJa  
Sg90JT2+3tl6g8ouZ5D7DfWASnBy2rP2Dfgek1X/xFcPxNvqrUtiXyOJfw+r  
Q2/rQbPrcwKrTTMKtC2s1KrSg+p5Jbv1rVrU+La0jLcb86+FQ0pU4ZR/wpUl  
6wt6UKbTK7eW/JKieKum401+fdjgfPmYSrmHkrhOzM05qw+uUUCOHJP5Qum+  
/vK++1V9yN/rr3l8blJy6GXLXXkbfZD0urKf3WmWcj+u++ZMrj40KLQqxXSu  
Ukbne5PIjfoQjPjQvflWKae1BuNSv+gDLf+jKXDYpDjWjEZbberDtrp/b03h  
bUrF0clwcXYD2Ng3hMbu/aGshMwF00oYQEtpdBP99C7l4tiy/6COAZxj5K3x  
XNmjBCuueVd4GMDwX6J15SeqppelW+4RqQZwW+jW+9ho6iYqpl1n3XID4PBf



3xjbpG5S8qJxONNuAG8Sms5/+4+mKenTfpvNaQPYZOrqfMxP0/ReitnyHY0h  
/Hu2zm/YQ93ElstmmstrCNLHjmQwCVA3GVNxGnnhDIF2bZ/Dd36qpgf2PHqK  
Fobg36vw/XLSLmWsg0/raKgh2F9LlnLb3qbwiQqqz2cbQnrpHUPKrV8UpwxR  
5RcEQ6BJzjv7VWWVUvILQiH9kyGo1HXV3tWYo6yaSiObn4YQ6mOd0/xhnHKp  
CclcYjUCqleMjyWbhyghfFcv7xc1gmneeDvaiAFKU4Ka+LCGEfwVUzn62HyQ  
QrOkJfrM2QhuslrbfjoYoajoGAhFJxiB64bvVknnBCWlzuSsQYkRhHoH1E7s  
zlJ6jImdFmg1AsSqcDlC6zvlSLgdz/Y3I9isee4ijFujmlw7c3XvGkEXlehq  
kcAmJVfj82j+CWOsnl8HsxR2KONlfod9ZYyBIB7f6e/9j8LPHMKsfN0Ybn/a  
IBtpUDc5+0QycgYYQ3Hd3It+1X1Nzz7H0i1lGsPco91Wz9N0TWsydRN1cZw  
dIvzzEg7fZnKXvru7R5jWDzDLd4rwtD0tGjtUs+SMRTU9GkkyzA28T4xdmdi  
vA5iSfwBaouMTVIPG4vVBK6Dpinjuyf/HWhiqj45En/1OpQOBN+AP4xN0fV4  
ttfW1+FnjaveUxxj0yZ5Vp0q8joM5A6QYpb2N7lRNGLQw+twSr3+qcU6XdN4  
SxU5lHwdApz/KH/G4jV6y7ZK+nwdjpmqyjMS9iidnYHnfq1dB49yiQs2qVsU  
+DBsJXHIBOTim+50nl2lED7hsrxETYBhfAklhCmK8Jei95UajjAxOOHTbNtH  
KRilp1t0MoHqEecQP7M7lKMTTrnLn4k0geOCYUPfbDpQy0+NnX2QC8zb7zZaf  
D6C9BYmna9MQLPEMtp76vyvX8maHBs1ARwkkV7ABFpc2+Hi3jGBG5Mf6V9r  
TKIbW1Z6psdMISj/XeFtNln6/7QmZV3CdlrVxb+zchNIg+pc8yc9U6hnzjty  
eGgMvaJN3TrkZQpl/xrDvcaH0CXGH2LaN02B00r+hOfgJ1TObOCYWm4Kchum  
z84wdaKTbKRHHW9NISmWwyzyHRHd5TjxmW7aFHh3tUauVDyiMJ6IOniV2gzT  
VdQRs3WtlMhTU1ejT5rBVx4L2gNxHykbZ1TDKfFmIEi+7Zzd4UGKi+DT2h0T  
M8jUkW0JaRylj1nXZQKNIPzzbn+0w/HKQbifqcD7pjBpxje0RneSUrH5UGT  
2mozq113Ko7smKTgZK/c/vHeDIjT1cbLnpOUOlx++/klMxggXcG7r45TBK/u  
23NhMAeGC+n2IfqjldxVJ8knZ82h5GTsRTOpfkqS7n+PT1ubw+1IMcnf92sp

u4Z3Rq0izEFJ2o67NakQ+ZpuHcl9YA4+U6J7/4aa0byl+bUhkjIMRAV5UZ3p  
Rpa2r/Acn82h6TbfbhHfJ9TneKbRYM0cnp9Zt/YuGURqbok/b7NagIG00cbq  
gxFE8VoS7DlvAc1p3mqiB74hCX8dayYNC3jI7nF8WccPQmuy1ZzsoC4v+QX  
EeKTiDvi2If4OAv4/NZAVkd4CmXGhNG/LrQAj+oHL27NTaH9Cd8Q1SsLWL9/  
Oumq2zQKT7kagEYt4JR1+LwnaRqtpT+pDN22gOIZ3FmOnmnkdldpmsRhCRKM  
uwmoZhqNZnud+HXREiIqNIwXbKeRXu4nfQk9S5ApfzHCMzOF3hZlpXh5WgLNH  
zNSNbzJTSO7xw5bKVEtoRtdFJOwmUU353u+FMkv4nVmecNxuAglU2V0499YS  
nN94NuZeGUe5te109lOW4GEXcDL061d0mCSSX0hlBRYBig/3/g6jhBe3BsZ4  
rGAxwj28b2gQ/fgTFJaFrGDcxGF5UKQfmchZ82pbWsGlDBzhqPZH1BKu1kYX  
YQW2tsqPfr6/Q8KUC66UXCvgqNjZis17je7scrIGvLQC/lGC6Y21l+gvoq4/  
P2oFPcpq3HHA9cgxcSfk+o8ViGzo3j/tWoE+NPXuPjxxA9RS1LeiBPKQ9F5D  
kcGVG8CpwCpmG5mMiuSLVJnMbwBV6dyMt7UAYopOWW4NvQHSSRuV3bTRFP9  
m  
34zQB5j/EiGqPiqJ8pXKXFKi8QYUkLw/ZLOTTFFRuDqyMIT5K5q/3L0eT3ke  
IxJduH0DrFWpKW5bgZSDE8mZlQetAY6yOpg2GiGg/mefxG0NjJlLDMOWcSjg  
tK+U/XlryJ3heeagcReN2ZiNntC0hj//jey8U3+MjuB7qrbMrSGZ7jU3648K  
pFakGPPJzRq0J2ZeFQhXo/BWosHzMGvIzA0U6CqsRTWTwgKpqdZak3fLuLC5  
Hs3S5P92flit91ROU1yJ6PiZI12KT63B6JiGw4tYEtK5mvjo5AtrSLOZcr/0  
g4Ti7P547XRag4WjmrVkBAmRY70UB4atgbzM5bjYS0Dfi6fYaxetQe5P2b97  
m7WI7831ubQda7D0ThOf+/cMGU93NbgcsAhr/5JVwqhLUAot3FQ+bgNjtj0X  
G2Vvo1f89VanhW3gwuvB4e0jCZQNjUHxXRkbyG19msZHKaEIouTuG1K3gar5  
pwJaNbUUy/hDA/WmNuD/mck9uPQFjNfxXNltFxuglWizXL7bSvzkz466llmwd  
4ZaP+M+1dVMu0E+c4s+xAc2os/UvWHsp9gJGa3tlNsCmMFQi2f2J0uOIskdd

NlBwgz5u0WqIUjDHPCHAYAtyst/ufxGbpPTvx9fRcNpC/UlBm6WwKQqj4Gb8  
2DlbCFDE83m8nKbg1FxNGqVsQSLsIX3g+wzF13lMOEvVFmorxK8XMM9RniTp  
7/pct4WxgoP/XeWap4yWvf2g5WQLITLcHVIsc5RD72SLhIjsQvkroX9zYYGi  
vFDIT5doC2IEb/rt8kVKKOMZ1YksW/ilTn2IdG2JUiWUzUUptQWbacvi8u4l  
ypQ60/J9oi0YWlB6qgsVuzhdo5r839pCRhrbBVbbZYpmyvpt3QFb+K5FTPPz  
WabEVDjZnZ+1hctBFPTDaJlC7By5zLBpC7KTWms7B5cpi4s6DNN0dtDrlGbj  
eneJorKxsFTNbgd/esskCb8WKUW7sR8iztiBGr8Zs77QluUf/ck6DQk7CCti  
IQ2eX6CYHyJnHVOwA9zti4zS/+YoZC790Gkd07AVlxxyfzhLYT+zbFljZQdv  
38X+1aGZoXifT1CI9LAD9kfjaksXpijdl3nPXgu3A5Yf9ZmCZycogvKNDJyp  
djBPP2u93vCvEqdmuDydYweH5WxXCiq/UMb1Vj7UINnBcbqGYHTyEwWZJ9VF  
kuwg6LP9ua7znZQH9nzZ197awaG3JHU5cQpl0+NIKOdn04iUp+758SGfoh9k  
bDUzZQfNtOqrs6OlqCp6VaF2zQ7aQilpZvQUdCA15WwUtT08f+6qS+37Fjne  
4WfUPGQP4pHS60Op71FrbtMy5yl78FMp7fdY7kWnSk0+zogag5m1g+u96n4U  
/nytrlb0HkYil5YCOAbRF/LN7Khr9nD6rkbKaT5s/rYKhGma2cPDzLuBFYPD  
6HZXsxWXiz2kuY9M8F0ZRcv9ZoqzQfagyC6+m6v7FamNbZytS7CHP2FPtoW5  
x1DJXDpj9D172Jely/CtcAxR/xT8rlliD/cNcWZdM2PIaqf111edPeyvwPPS  
LI+hxn2W9bMt9pCR9N/Ne+QxxMG8lV330R4ij417snXGkC9HRIj0N3vgqjJA  
eYLwFfWcErmhtWIP+b0WD8S/jyJhoTbF47v2cOPajYTvF0ZQgsQNgTkmByhk  
5Ge2mRIGU1e2GeuP08DNfy9v5D0bQqB853u0kAOEc8s9J5l8Qbnaor1a0g7Q  
b1R3/tXiADK0sbk/Z+QAqVO9AROfPqFq1z9h9fYOEMj9qJj3Yh866H/vRoyf  
A3TJlL30Sv6I2hLeCZzIcACNz6lowqQT8d22OzCf7wA+bb+DflK3o8ic3e/1  
VQ4weCjgFHXjayRZKU7Q7naAonvG4dY/GlEmoev+iREHoKczW79wgoBWmhzC  
5xcciPeR5FMVzedIo2PvBuG3A/AHv+mhUniMnvTmXMXvd4QA4+G6q673Ee3I

xXM6HI4Qco7a6Dt/DLKefn+A+6wjchfdJTAe9qO8/O60Mn/REW7WedE116RT  
OLeo+wiKjrAsZxK3vJBF8afKJeD1HGFA6pxNtuRDykdGyRwda0c4WUrHULT7  
kHL+yMdwbi9HcLfrd1rYvU9J5na1XohwBLKgv5fGZgZl9iytEvGmI9SPcUol  
ZYVSFP/LOxf70BG+/CzPdXDFozxpaSbdCkcw4Tc90eL8CO0o9K1wNzgLgXP  
SpovQ7ouYoZn3jnCt0ODxG1KDSq9nXJGfMgRvFpNLFg6iMjgm6KJ8rYjaPQG  
Cg6wNqMK+nxFHUYn+DN+B39BqhVRif25acrlBAkfmEdm5N+gyvC6Fg8ZJ3AC  
+Utpm+2IpoR1NEjdCc7KpHxgx+a1SZfbZoypE1TTmA7zSXahqrX2QzddnEDO  
9JcoTUU3ojvOL5IV4gTs22XFu1Q9yElhWrkg2Qm08ijs1lc+oFrn0RsVOU6Q  
hMeJNp7/iBhuS4fWlztBrz/nk9ZnH5EV6e7dpgYn4InLmF7h7UX1Y6tVHe+c  
IDZdW98+oRcdNd61zfkBly+GxZqY73IWrr8anTBCQ4yC/o0C/YhkiHdv9lt  
J7BD6X9+OvQhlnAbzp+MziA30eVMk9WH7lspEn+4nKF6IP7ssYY+1NjJpUUn  
7Axf/ljnGX3oQ4fWApXZZ2hT4wGpr70IUeuvhguDWcgarEEzXzuQy9BLPeM  
mTPkSQpXx7ztQ2zOKURRV2coad+5/rWiD7ncmv0oFeoM38b4R3hi+1AzUXFJ  
IcUZXm20Sp11+hDHwB6d5gNnsOfkEphi7UPudH9OGVc4w+Tm+fbaN72o9fx1  
WetGZ6DqF93869GLOA3rDF07nWEgrfnUHFmV8gxj9flfdoZompTqrLyP6E2R  
W3LkojNwHPrvqLjAR3Sis704accZDITK/UnKH5DvzzNNmQdcgDyK4woW6kEd  
nNFco+7QPGm88+VrW7k7yTNXCPrAiXahYXCxp2oM/3uuRcaLnCa7ur5+NkO  
xEtcVWgzc4EJtgKdFtt29J62PHAo1AW+8te1MfK+Qfzn6TKmUlwgsVbV510b  
VhRqYPP0+wMXEBPm1ZjPbEYCRVzj1C9cwMVZdnEO34jC3wXsMHW5wKKh0tZ6  
Jgn1rfayc4y4QHenqrb6RD0S5BT7j3cJ2z+qgTDMVoui5FPUhf+4wFshlo2K  
C9VowHHW7hKTK/z+65+vbl6JzqcrRuJouEK3k+PjhJYyhCfk3VcTcQXrvaGf  
v289RI9Gd2r1r7iC6n8Npbdai5AY7fX3Ftdcgcfu+zspowIUJ1I352juCmsH  
mz9SEnPRsD4rjY+bKywz/uKZYc9B4qFu3GFhrsB/V/Nes3oWSips14xPdQX2

2BxdkZMYn+s4o3froSv8fVblQpWSiS6tRrnlPHWF8SWrnePxGSjl2Gh88Qts  
/UgEt/H+DLSdPkex7XKFC92Q7o3ZzvTrv06PYPtHlE3IhmaggYh/ohOLrhDO  
9eoClUkmUv7F6Fiw4wrTd27dY8q5g+rdj+bd00AGf8f4hcsu30N807wDJ4+7  
gdL3ZlbtAtkow/w8y5iQG9yveafRYpuDqD5JqTyScYOkkz809E89RJ4aVyMt  
1N0gUoDOrqQwD31t0SaeMHUdOatUIq6zADVW0wg8CHYDQbHKPdndYhSQfoc+  
m+QG/H9e74xsVaBpunycbsbhlcZm908qkT6ERWBRwfdQDSNLWl0pgpdcG+Z  
vbPpBjKPWbjv/6pGeVPdJw3o3UHa/0XA7psaxGz+xZiNwx2K/+3XSEipReF9  
U+m9Z93hCHXQDWWlOrSo/uPt7cvulCidGq61WodMW3b+6Si7Q751u1PNzXrU  
IU0vxWrkDhxSVXOxxwhlsvqwV4+904gFt7Y0phPQ43M8T9L83aFgPOHVq1UC  
Ys8X/KYZ5w5MopEl2lelCM9x6djBu+7AwyF+rtaBiH6myet0FbuD0l0m8fv9  
IrKmu5aYUucOu+dNst3riagn3PiV+mt32Eoef2z+hojQhs0Wwyd3oOZKapLH  
9H0lm8d/HZPuMDrwlNL+GuPfU8FOiWvuoNFcFlWE+SebxeWr0HgAc9/IeGQu  
Ef3uvTVIx+YBSwxFFKZwlnJuf8jadtoDymxM1rYMiOhzc6lqnLgH0A6Zm6/x  
E5GSdG3UVQUPaHFj/Fz+g4Bqn1NINHoeUMHRd0V9PQHdzus/F+PtArtPqhWO  
iBPQv6PjNyDaA6YTy3LuLNQjj7Sl7L1bHrDP74Tulfx6pBF0wxD53AO+W86q  
v6StRw3rzIBeeYD09d/K64Q6J0jGFfy3xwPatLcPMzvVITqzC/OhKx7wXEQu  
taSrFvn3XuGV/ecB6Qekf0ZF16JJNVWTbWZPaB70ur8tVYUapaw6gkQ9gUnx  
J3dsTQ0Se+5CJYU8gdBXWrvqX4MeCQRib2piturFPyRUgw7mRXsTLDyh99F6  
X+LBGhR69GaZv7snf0xV4mCdrEYLN7PHL4Z7gtd4bOHfmpkQlvMuZ7qCQFv  
mfX2iqvR27Aq3dqHnlAaLU/9NqMaXV5vSPJ56gmtTIHpe0nVqNtgqfd0Ixaf  
/p2yleRqZFvPfaKvwxMuX3gbKne3Gv1m17bHD3pCz+ib1cCyapQeEPVMytYT  
pDOUN0XaqxH/QPXm5IYn8CX8C1xYrUYvJcfl7+zzAtzGYyskUIP0s48kX2Xz  
Akn2tfsEpxo0v6XUt87rBXUncw6PE2pQpEngiZL/vMBJU69e43AtYm94Ym+I

84K9zx/dY0NrUQXX0DNaLS8Q2ngvwLIWixRCD2zVm3tB7rd/77OC69CX4Svg  
40oFVL1c2mks9cjzikfy0RAvUMm96JJUX48e/P1wIjDLC35yDlde2CSgC5bU  
DgKpVWBM/ea/S3FE9JYiUTVQ5wWuH3V62ehJyOKk/VZCqxdEXqQROxpOQuuR  
90Cq1wv270TzJM6SUMq3t8lz37xgo6K8rE6ZjHjhd1/2ihfwvTf9MpNDRsQC  
IW61XS+InvMkOE+RUWn0M4m/dN5AF/NWLZGvAf28oHLdkNkb7vHiHt683oDk  
JsbCKtm94ZhWHeE1vgElZQQV0HJ7Q2TavsKgkgb0SeFQm8UZb6hwPui4/rIB  
nVwrW6gX9oZ0h6fM+O4G5FqkwMIs4Q2cTE0Fnp8aEEF/WMJBxhvExk8L0vY1  
IKp9ftcp4A1kt/rKtI4GdK2OKfyomjc8uWQgZUxqQFl2JQUeOt4w0zLysSyv  
AU0cQW1txt5g9UAE/zGyAZ1/83mBx8ob/irxGnKaNKAgf0+WQAdvqFTL1ukS  
bkCt/Psv9rh7g/55z4hLW2TE8jn/uoC/N3wJxM/mUcjINF46PDLMG6Sf19wx  
iiSjksu9BQN4bzCwGEorliGj1RmXNrEUb2CkG/z6CdPfCSoPWb7d9wZRh86i  
/dok1Lt58aJUgTfYC4cJFW4SEfeT7uu3nnjDGn2wkPpDIqrd/69Anugn1ae7  
yatDBLRlymrLpnhDo8eYaYI/Aak5/7f44403tCzXZhsfjKBvHdYXCz55g2c+  
J/OnS/XoYMrrNqqf3iCXc3jQ26cWORxMXmwR8QG9L6cMPhCeoaoufAX5og/0  
P3X4T+htJdpMCXd9fsUHjHw3d9lHnqlERu/F3Gs+wHYr/GP+0QrU0+FSccfA  
B1aa62IpcuWII8nONcXcBwZyGxJd3cpQKf31xSA3H9hiJlx7TZailTbdCk8/  
H2gPXJ5W0V+KJOM1XB3CfOCzUuD9iuJHKFJJSdgi1gcWbdb1zcZLUPs+3KJ+  
qg80v6B1P6pZgg69lqpQv+MDUnDtysM3xcgEL+4KD31A5KsT510NYISgICls  
VewD16P/mNF+K0LzVGcXRZ/6QOKxj2aO+CJ0oflkBX+dD8TdZvK6fbkIBUdx  
up544QPcQ+9+KGwXomYcmzDbax848Q1/SbanEDH8Y1pk6PIBrduDd6UjhUiX  
Qlex1+cDEcPOzn+rCtH98D2XzWEf8H86SK/8shCNX9kW+j7pA7Q/37T3fi1E  
Qn/WFqYwFWD3fi+NLXsR8m1cLh9e8wHhjDxWgnURagyZdend8QG19m7lINdF  
iEZmXKiDxheEhXb/FqBipPF7aKHpgC8UIHy8Sf5QjDJJn8oJbL7ge25e83Zo

CRoOf09SedwXPPKn787hHiM+yXahYj5fsNxxfBnBU4pcfzUv5Aj7AovAoRNs  
x56g2vrG8tsSvqB5KlbB/nwZ2vGrd0mU9YWpUrNRCatypHixSihS0RfyBtEK  
elaBUteeLPhr+ELo7a57SscrUX9NYbmbvi9wvSoRpi99hrh9HrrYmvnCIT1X  
WkW956jyR/qCjqsv2Ivkr2XG1aCNqqRyFV9s3aBdqzS1Fsl54l1QqC88eVjK  
0VRch7qXAXaEU3yhumT4UeU7Avq+YLFav+ELt+f+2y/0oAFJlhuX/63xBZDv  
jA0KaESRzrou6w2+8Ply16aA6gvEMnd1YfydL0TS7n+l1PMSGZei8sFeX9D/  
hjtGHUdBeQ5SLj1DvsBnZenceKEJiU0LL7xY8IU+zejfr7xeocBi/vLan76Q  
/y2dW5S6GTXZnnQp3/aFG98XGIVUmhE9H6dQAbUfaN4mXYfEZqQzcXghi9EP  
DjFa+Ym+aUb3C5jK0w77gfL9q+mnd5vR+A06lzguP0iK7BG8INGCvMd+z/sI  
+cGlvfY4u0WpJkZLz5xAfOXK1E6Qm5BgipsobrSfvCqSUqUa7QF0e7ktb6S  
9wPtHwcCD+62oPFnlkz/qfoBzyTV7t/jreilDdkgT9sPMp/+zd+53lruH1XO  
ZTb2AxbrCbmj2q3I/13vdLilH/w6kljYdeKdCOsRJft/aBi50fleEARoi++  
FGDujvl3TeXUxLcihpmgpk4/zP+3xruxzFY0fZ92v2yYH+ADDqgFP2pFzZoZ  
OuV4P9Azodtle9yKgusrxhMz/CA9X+aaR1UrusD9xsexwA/GvKma/jxrRQc/  
6jZ+fulHKTg+mu4VrWg+9iuN8nM/sPDyvUIuaUVvpFyv1RP9IE5/yvlHbisq  
WNq8c6bJD07jympP32lF4fmxo5ltfpCIUrJpldiKTAwOnaV57weq0Y1spJBW  
dGn/Iw+ffmx97/20jGsrOvRCiDg+4gdzX1o0tkxa0bIn8Z/OlB/k8Ybw7Sm3  
og6+q6qvFv2Ae2lA3Ua8FUWnWHx5t00He6Zse377WpEFboGXmdofhM8R1ZQW  
W5D0WobLOIM/VHTcNK360IJWTW/tmB3zB8lhK7VbWS2om5n7audJfzjgxzt5  
NrgFlbWUpcoI+E0TeGHjPZMWZC3Uys152R8sfN3zgaMFfy9gfus7w/oClIVE  
VElzs42i9VJ94cvcY8s92c0oZvX5rqa7vnD21vzHnK4JuS858cu9sgfxnzZ  
yaeWKIjXKe3xwUp/qLQ/t+ClREG3JZvb373zBxf3WdXnv18gr89nDyrRBQBX  
43llz9gGZCKeMpV2MABqtOFV35UGBGkrjYNHAKB++OPuh19kdEiZ5OLGFwA/

F6RvHPQio98FjxQIQgFAHRyslShGRuN/ozj3LgRA7yG6bLZVEquV2vPIA+A  
vsTRu5dDSej+oWd5oyoBcLN7FwyvklC0++FAAe0AKDveHHaalYT0+If5Gy0C  
4GNpMPe9KiKSjcb93WcfAB3axxT58ETEN1r0ScstAP58ehIgykJEa3fc8BMh  
AdCv/iM+iomIhn98MBWJCQDHEm2+mnkCar12STwgKQCoqlevne8goIon9xle  
3QqA+4XlItPIBHRn3+43huwA4K3SetudRkDhN2xI+nkBkHGgZuCLHwHZv2hL  
z30cAFNLT9b/mBOQ5jFhx9nKAGBIpI8QUiGgS37p6EJ9AGwckuwzlcAg7g9r  
7KEvAiC36ZqhDy8B0YpcX37dGgCbb4ZtfA8R0HLCi9fMnZhtwmd+jYaAPk+e  
eni9NwBuP9/M//GrHjXh4nwLvwTAi12R2/pL9aj0wbz60rcA8AjOSnWarEfp  
m5qnL88FwAPDA2unR+pRoH7N78iVAJBsNz8T8LkeHWtVNC5lCgSBe1/1KO/r  
EVm8v+69YCAUGifzFmD/F6RJpx67EAhXbNeuHcf2S1rItbWRCoTBo7FUzzF+  
761MLfsUFwgupax5emv1yKTQ4fAv5UCYU30P+/WnHsHuu3mcViCoSHgcSacn  
IEFTseYkw0AIy56tYGEjoO1DW57cdtj+5Xd874kQ0KS7uYqjayDUvPKyxcsQ  
UGfHK55qn0D4cPboML8aAT2ITuq+Gh0Io/UHx687EZDsKpew26NAOFA+3cJe  
idXjg9xMw2AgcMIs8etVlrKRpTEp+hYI1Jmc3qNY/VUet3emzGE28fG7Fg8i  
OhymX22+FQh2fNMje1lEtDlz7lzSHnaeQr6B9FMiGtX9eu/8/iDwnOhY4HhF  
RKUCzmG7HEFgoBP2I36GiFizRFdmTgZB2Qbzyc0tlvL+u2bdIxAEqh18C12M  
JCTbF6GSLxkE4WWzfU4iJHQKXW1IxAXBqZv51cxXSi2jOG8t0oQnNVcKfui  
TkIflu4cVjAOgiBWG6dH9iRUP28SJ2QVBO8X0pcDvUnogcHJrcOOQVcK7Xjg  
chgJRTVNueX4BEGwkHtBexwJ2QuVj04GBMGgw9n0k2kkpH7XU6crAovNB0ed  
0F0SEtu72FoXHWsAnW0rX3Jl6Ijr9qXcNOx+2URe7jwS+t3f9CTuXhBIpHkK  
ThWQUGuFeprR4yCgGKIKvSwkobTofl8BQhCcdAo6NvWQhHyXcmZYKEHwI2jU  
/loWCZkY3zDZehMESTwCbQPpJIRa+Lu+dQeBz9WhYwHxJMR3fhF19AfBf59D  
5Tiw970/+3l19WgQqDfdYqtwJ6Fl6oAzOdNBOLKYG8JrSUJ97rJZMctYfpXO



6blcIyHS4B6D60YQdOkQGGOkSEgz9mg/E3swCAwm0hktEJH4yrDKxolgWP4S  
cePQIBFxmBY0jJ4JBvF5mXHNNiKaEBPJf3YxGJizf6WpFBNR4DC46hhgNvNR  
PiEHijXpv8qZR4MZL3PMsPGRATVXTq8dsFwxw83T69OREwJxpd/+gZDHfEv  
fBQjotXVE2VDocEwk6qR6MZHRAPmE8db8cHAWyqRG8VBRAxi7lR3MoPh5uHX  
LqxURBSfK+4X9iAYyjnsM5J/EZDr/q0Zu6JgK0u4zRW6hOHD15iuS7XYfR5G  
nmj8QkBcaqo4nsZgyPCStmL4iOnr2oM1dK1YfCZe3961E9C7pOysgV4s/l7l  
z8VkaIKc/5EhNRQMDE8jX4nWEtBLVbW0++PBcOCbfR4X9j4uPylI2p4LBtMs  
swNHUgKqot+ONfsRDDI7LVvshQRU0FYeyv0vGF66e1pkZBNQZpyZz9jBECBG  
h6mm3CKgQJqXVrbCIXCP8Df3WywBmUXzaM6qhsD8woePqxEEhPsXKePqEAKt  
nlEvcjCbL3xcYAUfApfv3btMxBMQ+5UMnuqMELCyYgtXSiQg+h0Fdt+CEDCo  
yj3Gh+Hpb/LagUvPQ0D6g3Ksxl0CWgwqpt6khMB/TKdkG3IjyG7wz1/jthAI  
P34xyQWld1TS8DepOwTMKmVILth9en7R/ggZCYGRv6UB12sISNXIcnF4MgT2  
s/RNXSURUHM9YebKYgh8VglejaAQUK2f4+ju7xBw6W8q+tJJQCKfmgatqEKB  
HHbm309eAiqROPbp1f5QaPyRut800z9ZP9vfxXCEwvLkag7nAgGFegmR6C6F  
QkBI+8V1bj6s98TU0l4JhSHG/e2WR4nIXWz4WbtiKLDVmIuzniliq+8pJcl6  
ocC50K2mdJGIFN2WM5i9QmEWn1ozZ0VELzqV0jwDQ8FH68L5EFciuiT8KOID  
RCisB//5rRIIRAILWIEZN0NhLTtNpSGdiA44PXc/WhEKOiGW43dbiSj6s/O+  
o7WhQOG5fV2IF8Ozq3wP2BtDYedcynLWNYka5L3XfqQzFEo/ocM+00Rkckvb  
6khfKITUq+fsYfq8Z3f/L7bhULjpY3J0l42EGodD+dgWQ0Fmj29YW4iELqhf  
aji8FgrSr0Inyi6SUCnpu87hnVDAhc5CKCIhboEns4dowmD3hnt7uwojZd61  
jjh0IAwEx5eE7+iQEMO+4+yH2MLA+3j63Nh1Eor0+VTBejwMEsXCQ57dICFX  
bZUvLMJhMG87zvzVg4TGX+55skiEQXZrGcNVfxlyFmmgY5ENg9FQm3f/5wfd  
Ob65zIph4Pr0YjcpioQUGc5fZNYIg59+amldGB6KzeRZHQLA8K1MdlaDA+P

tx5OZ3INA/KeW90uhodrYVvzjCnY+lpmCls+CXVe/nqVoSIMLGXoeMqLSajo  
R2sefScWf/OBAGvMDi0v26ZdDINUv6XcQQwv9e3SDfcdCIdd+R95zzD8E+bx  
f04tHA4bh63iY1JjiGNndpRKNhzmOPxt/mLx0AyaHqDSCIf5z1FmaxEkNHxb  
3uGfSzhoB+cK5nuSUCot04k/5eGgcWD2i6AWCd0WF3V83hAO3b5eox+VSOiu  
IU6N3btw8Mqaa8yQI6Fc8h3V7vlw2H5jqFx+noQKZgiZ0b/DoVe46NbZsyT0  
mO3L10sMEVBBfesn3UkSqpDfEVw4FgH/AlVILY+RUJU7t/+jcxGgQt6Sxh3G  
8PWt9QF61Qi4Zbh6dx7rh2bexwWejhGgrjgc+XCPiN6FLkgOxkdAstiGadsf  
IurrF30v/zgCsqNep1zE7BExX7uyNxFQVrgXmL9LRNNJxO1D09j6cm7MaxoS  
+j65cytkXyQokG8xmx0goU05eYFjvkiIsuiO4GEnoR0XG58siUjQeOGr0chF  
QntZsS81FCNBTFz1cscprH9+tuvX2UTCufSNLHZREjp4cvGRk08kXE5NKVW4  
REKHrx1cOBETCWpdHXQUbL4ef6wbFVcQCa5Ang7D5ofKi/sjQs8joYYx8fQp  
A2x+9Y5LfaBEQjdvImneDKv/rvcq10gkRJ6xretzxeptnGHz/GgU/JnzU5PD  
6lnqPkQx5I+CnZuUSs072HzCnz6+IxEFA0Zv1zSweSj8vKZPSTcK+HEW8xsV  
JDSyv+/qcEoUoIHkQekOLP6TxwuicqJAZj/lyVoPCV26ZPuXvywKuCTQpM1n  
ErLWqDDpjEZB3mHu4KgRErppvVbv1RYFKdZuZkoTJDR9E+/ROBkFOVJFHU+W  
SCjPgvEODVU06KR5EQw2sHwm5VzT4omGjwfpRiv3SEibIER7XzYaDG49oPOi  
JiP/hYvZoRrRYBLh8/L9LsYneHDClmbRwF+ypnBnk4SeSb3207aNhunuDJaE  
n1j99dQo8q7RoOsanRKEfff7T29uG80yL3TqLea]qHZeH1dvtBoCJWMSJEY  
JaFvtq0/jkditsY7h9pBEtrOH8w5go+Gb/+KmRb7sHo1WkzRpkQDzuuaZDiW  
Dw7VU0m7adHggXsR2t+K8aP+ifObGdHg1r/HMP6ShCRWHAPncqJB0kwLf7Ca  
hOTChE6MP8LOz98+L1JOQsoMy6++FGLnVTcX/Mb4iQmfd2NneTTsa5mxfZij  
4YtxWG5lQzSgj4Hd414klDSFFB5TomFSYUbW2JGEMrypZh+1RMNdjj/ePhYk  
VJIS/9+td9EQc9e27q4q9j6OqfUnvo+GVd3rUQ+w90YqORAS3RsNgx4ymQri

WL803Wr1GYoGypWy/Y+wfu2/pu/k+jUaDpu6X9dnlaGvX9gP2k1Ew+nG3GfN  
+7B80QxWm89Ew9nzzTPT2xh/WMsxMlylBv1wy5EXq0S0E2Wxo/kdy3/QHxff  
eSLax3wqX/lnNHAs83oEjBPRwQcTV3G/sP1KDZv1hjB+c65kXnI7GmT9eOT7  
+4ilt94x7b/daHjES9023U1EQgpCEoLUMRAfliz6qp2IJHqWBnjpYkBQT9bw  
9GsikjOvCuNijIFmz4fsPBi/1Qm42HbgcAwQickf+8lEZHulzPKXMwb+o6Sg  
9/VElPS6tXBMMAZ6K/Menqgjoudb3ZdapGPgZ2rKlfkGijKmn6EXgRjQvJZ4  
JLOjiP6y7365qxoDNE9fp5pi/Kv4zNGn/7RjoJGWmiHmPRFpSIhGOBvHwKla  
qmMba0SUJyPjyGMWA1L9ZzPPjBLRT1DW6bOMgS8H41TzJojovo7laTmHGLjl  
qSno9p2IZt3T2lj9Y+DBs5rLJxgwvu2fU/UmKAb6kdKmBaYP08IeZ4eExYA8  
rjfQmwf23lloLlN4LB9yVwjWaiQU8+Q7MykjBu7Nr3Pfx+rNPallbPU8BlTf  
80Ro3yYh7wVT+SN1MZj+eyrcifHl16sOgh3EGHDLITYZYPPAdS9iR7wpBoIK  
SmwSiCRE5q7Ko3sfAwtt8fR8X0nI4DrLX0ViDFTK4V02Bcmo1Or4R5uVGBBJ  
kRzlkSCjHQeBBo61GlirWtQXvkjGBf6410jtGEgRrDsyr0lGKxme/xky4KH9  
oYvxc08yUswJ5WQ8iIdu0xYLUiAZ3StIoG5ixYO22vCvW5FkJPc87905Y3h4  
Ylf9pCyNjFK6e4L+nMWDn1ZmxIVyMrIwT63aE8ID9YPBJ7+fk5HYourMPjE8  
GAXvTXgTyYgqhJabQQIPVYsdS/deklHf/hb9g5LY/utrcfatZBR4VraZHYcH  
64/29j+7yej41TpRHhU8pJ3Witz9TEa2kY8ZxIzxoOBsYyoyRUblDdlTOEc8  
BF9fpTu5QEarG8lNoOF4uBrV6Ec3R0bSF8JzrBPwUOsVnXl4llwOvJL+aJ+C  
B8b+n+tDg2Q0qvWL3iUdDyJUYjdoP5FR1WgN8sjEg+nm+p2092QU7ebp750F  
h34yjb5vOxnp7wg/DXiAh2F1LtPnzWTEenzw3EZKHh2dPN50VGsho81gJZ2QR  
Hm60myqcrSGjllrHXwpHsiL1EXXy8jowWWehIQKPPH2P9P4nEdG7m+GXqZU  
4WE7kfvPg7tkhDPIWk+vxe57itnvcTIZHZrUF75DxIP3PZzvzwgymvRmtclu  
xMPEkhc5zleM6ve6sh824YH3rDWdgi0ZXedRpit5iwcW9ZBaL1UyEqyklivr

xANOmjezTwrrB9km38oePMgcwQfZnSOjPBOP8foBPOTf89WnoSUj7711joZh  
PKQqRLUzYvisGFitRRnDg8qkoolE1m+zd4RetM3i4QLTksJQLdaPFLM/3y3i  
YSxbS00vl4RSaooEe1bwYMLnp//1//zow4msgU089MkUe/Nj85DK6kv38A4e  
TsGghK4MNt+W7+779g8P95MO2NzgJaHAAYw+c/SxUNyop2f7k4jUcjqlB2I  
hbhXm8I6I0R0XDBx7AdLLESdLKsQektETcpUmr85YsH+tH5XTh4R3e5/if97  
PBZyx0diBW9i+GIX0kB1KhbSLtw9nB1KRHQxawKM52LhckPtCJ0ZEY1NHX+8  
IwxLy0sxlevERFR5eqZZbFYGJNR0r2GiCi93K3wq0QsnJdMij9+gYgcD949  
9UEyFsyfsdY800NEOK+Xj5pIY+HBI9Z0ak4ML/umT9TiYoGDjjLlxkxEb7Mv  
c95TiYUwiY1H1tsElLdjmZWgEQuvNuZuZ61iescygT1YOxa2BCy/hs8TkHZz  
VaaLfizotSfhDk0QkMCZwUPmxrGw/SnfS2sY02fxe+maZrHAc21QRLyfgAbm  
zzHjrGJhWdhejNyD6a1ruqn/2cZCpk+YxLd3BJRQFcx42jEWcDz660VtBKTS  
9mKnMj4Wmvs7IK9ieo5+9N+S9GPs/vWGeyRMn4zhzrkKl2P+/26KrGL7EQt1  
5k88iwWuNBwu5RMBpdMGOzLXxAKjVd4aHtOPjk4F0//qY+GW18S+wa+YPUvs  
sF0lx8LQKznR2CkC4hD9OT7xMhbYtWaE4jA983ZN4eubN5h9bC05aBPLh5Gr  
ObEDq4dus53dLpYPcubQk+5Y2G16vptFi+mRyKnPKf2xICf51qrjCBElMMb3  
6E7Hgo/JI53flzC94/5MU3E+FnqYFEreYvWS/PC58+JyLMDss8xWFQy/7wq0  
c2zEwnFGkpCkKRGp8Ha8Gt0XB4Wf9Buro4hovxRTjfOZOfiaYrl07CMRCbJH  
+HGciwN/6BZNxuafxs+Vy2+E40CPaT721yTWD0/7Gk9JxEFzWe6T2I9YvXkf  
vBmAOGgSKY3wP05C0rtMiXFKcXCKfx+T1xkSMhuOUJdQiwNDWnyDNsaf8+7a  
9KTpxMGutOpoLaZnBBiFvihZxcG93IcLr61ISG32wYM1mziY+lt34RHGH1xf  
H7QscliDIKYaSxWMv1dFrE78cY+DPL5XXbvhJPTRzLak3DsOPIr3KPTYe1uT  
6ne87h8HxoqJv/tTSEhyjbRUGxYHF7PflxGzMf7yQajKOioOkkUoH948wvhn  
5UNvltg4aHhgVJiGzZvcZOaLLxPi4JfBf4EsGP9pcoz65ZISB25vJ0uVqjB9

cdoutC0jDt7fkY58S8L40YjKHm90HFiHH1/efUVChm8+s90ixsF0pfW0BsbH  
7J/ZC+x+ioPE5MhW7XckVOak9tRkBMt3a/lhUYyPLZ8+f6F+EqvHwL4ny2QS  
Ytl7tGYzi+UrKUo9tA7Tg6OsBNbFODiP01UNfobpoYaYIMr30DBzYtmeKiUh  
/6x1GbefccDip09qxPRVlp/DX85fcRDysX54G7svWXew6e3v00hcef8i7xam  
h0TVY/z/xsEljFlXmkBCfw+8uMpHFQ8zwwglcrJheOjl/nv7jvnhgPWes+tmX  
hKAtryNifzxMFODubTqRUGwUXmulJR6UOhvX5XVJiH+6xHKALR5+ZxxxU1Yk  
oTdq7R6f00KhLOC7YTimX2nZDqa/PxkP8gHauT2Y/igJFMvr5IuH/tJUXUb6  
/+dPt6pdIB7k5BIP121h/V1yr6dFLB6a05peaGP8RICRPNYkEQ9rZrtncR+I  
qN1je0WFZDycSdzLy8b00IPUKVYiLh5eTRm8iq0gopR3ZToV2vGwK2jTzoP1  
t7BY140n+vEQSj9BkA0goq7M714lxvGgsyhGlrhfm9C4naeVTxl/5HZ6Mbe  
R2WzYcFD23iwfb1dbatHRFpng6rv08bDoY6beAN1rP9XXnzM9IzH+Jq4o4Is  
EYkZjI3f8o0Hoprk9pWLRPSBRPXzZmA8fFe5WHzzPBEdilE+nBgZD0W9D5EI  
LxFVzzidjsPHw+VtrueBx4lIVyNFPCYhHp68C5A5cpSIMo580AtLjwfdh10P  
ZJkw/Td6xDcgC8tv7ROhbBoiYis1yftKi4etcPa8U38lyMDrUa1LaTwU03Cr  
vdsgoLvSk312VfFgOPTOKeUHhj9dbkdMmuJB+Ig8pwiGr/ctfxlo9mDnp7V/  
qJkmo00rkXdhDLMriFU9mJ2LZ/h8aSuEfrtvfBbH/j95NPOo0L940GzCYZ+6  
QkD5T04Y87AkgGuVaFjqFgH506z/u3U0AR4XyP24/ZeA1M50PaHhSQDjpLTG  
Q1i8a3mh23MiCfCX8/VnKxZsHljoF5ldTADLWpYZbuy+D48LX3svmwBH+Fw7  
L3ETkVLWUG6tegIYOJzM0hMhli7DGuWzegmgJTR2RQXL78rh5JVskwQIKAmT  
9L9CRNlp0hDhlAAXCnnKzTWJaDEue0o1PgEMh/P++HsR0StFr5uNNxPgfT3  
V7rBRHSXsvWy6N0EEH1AGOCPIsIUvnpAVpwAkSejQ+9IYvmV7fkvviIBxgIX  
3p5+iOHn1uMvWzUJQCX0YDq+GjuvfkbcX5sTwDMsn42A8XN7cdFPOh0JwH/Q  
fNLrBRHJ/KANb/2QAOGDIjSTWH+yPBvlvzyYAOVGBxr7Oolo0rX+/ZOxBJj6

N1zdheEtSfBm4PHZBLC7xrsnMUhEN2ftTqV9x/JTp8Yt/pWIrEuudOxtJMCB  
5/vnKRj+XrY94uP7NwEKiP+rwOxjoY7jOK5yMw85rGXyNLpQYR7yWL/uo9ws  
Yu6cKw+tkk4Pt5VUV1RSeX6457sSZiSEdpRT56FrHS3PstnQ8jRHS8cUidCn  
P1/bZ+/P+/PdPt/v5/M10TIwg+el0p+jjWZCEmkk902KgmDY6CRYaDLB9NiO  
+FS8n904eo+H4rPg41hrtBMyWWn8STS VBK6b4ML9ts+Ou3hcFQ2H02JEEav  
4vswm0LY9mdD9gTVY34D95krH+rCwnNgYT6UbKDbRFgvG9jc688Bprx2TU5q  
IrrXu1NYYbmgQ6Npzuo0ESkk3rBrdy5MfMIYLMR8Caz7Kl5AHviSSgbsfyql  
iMrEygVFHqjHzrk6LKOof2aTAg975kGjlb9auYX863Zxlb8yHzAKTvWzUUzdU  
6kU5F4B3lW17/yb004eGXZzLC2B90SwnG0tNDkoPqDLnAdMk7EUxzks+DPdI  
Sh4PcuZF3E7cX+IcuGQaiQ9qZ3ZRy5yCqCqP/MUN5MMfZXOjWqsg8tu7rK+k  
8qHEYULEQH/XZgKC2Eo+mNq5+tDxPKhpqhDGKh+Oj39hJqMfl0tq+GF/AQTR  
hbqvtzYRt6lin2hvCKCr8PSoL/KU7PjkSb0AnHmN7l4YL99JLds9JwAfr6/p  
OnUFcU9iFlfIIIT1JbdlOtZ7IE/7144thNjR8dol3Fe/PeiUPa0QgpqrVNUj  
EzaHucPjQuiLOeVpjH4Eb+tZ5lYiMHxUW1qB3NptYhocKwLmqF8xBfX0x6u7  
7hSjgNrQ6m2M/Nxz6u/DURE0MA5SIjA+MNPKNXeXGDjiLSODqH8/9Uc5K1IM  
gwUXekuQW7htFvZ8MXS+iwl/hjw+i7s02ScGy0WLBQ2y7snE5jKyBN7I/Tri  
UK+DMxnuGCKBV800zhJydlqEpiZDAvSickeI5n85lLao+14CfXE6Yef//2ft  
l2+cWpOAYPvkZyby1xXNdI2/FLZp70r2IH9vt+75c1sKNSc417+jntRnbsWw  
UQpXf/WyW5EDqpUUmwUpdLda5NXIIFtRxmQPGQxdXD1Th6wXtPJ7M0kGqkqj  
jhbkf3QH9dY=

"}}},

{RGBColor[0.880722, 0.611041, 0.142051], AbsoluteThickness[1.6], Opacity[1.],  
LineBox[CompressedData["

1:eJwVIHs4lAkDxedTCA1KF6WJlImj4x4wZDDPvnNGsSuvyyWVTW7tilVKNNNGWT

LmTcxjXzdluUVJQt+toalVYpJblUZlOm5NLFLimtZkPW98d5zvP75/xxnuec  
BeFbAyN1aDSadEL/d8HQHx+kJjQRTB/aceqWiF5m9178S6YRFYW/yOeutsTe  
e4zt52X9Iu6RUtULfybkET3eH8yHRSmFaVbvtGw09/CDMmVjlkGtHnnVkYeM  
qvqLZtE6eOttZ/g00w0XYmPdXpnrwUu8XNHmz8djDqPm13oDZM7que1U6IHP  
H+slCTI6nvcvfo+wBOKVareU3mmOHtBvHuTrwBFKuMyo+jpKKJzB5zbBKic  
E7E5VjwDkwiT3Ay+ELfjVax281mYUWnQcCxJiLZ24yHR4GwMBJV/sKsW4g0/  
4rfT9XPAbFfI3LqE+OeIKp5eZIG744b6KeNCGH0xFsbJGIhpfUVvn0FiXlge  
7bmvJb5py7cT2ZCYrel4VZxnhcd5OUIRi4SVQr4kKHEBVvn8tWfEIYS9kFOq  
H70QcX7rAlYISHD60/SuBVuDvD30SYRCC9f5Bu2iG2Q11luMiomIfHINCxw  
WoSmhwnZCUkfMc6mG3mthjZONOlajDKuSK1Ml26J2Urk6Z4HXfc957Dtrh  
QTvzpt4Eb6BrAt4/XwxLi9sVfC8S0hvyqpP19tBT7010mcj/OYYzi+SSA8z3  
jA/ogEQSQ7PDoliJJ503BqtIEgV70PxtMifY8tTGjz1JFDppjlqHE1AfTzvv  
60HitEY+qvZlwfzxzuYadxldhQMvC/OckZOc+lBlzHwdUmJbjQHdo4zxJMn  
+ph+c8D+sbkrvuX4HKxbQCJMjHHbIhMi3nTmJZE+CUluUMgeFsJhfHN8nC4J  
nWZT3b93kLj+eTysbBKJc2s1j3bvEMGqR3ebGY3EV9LziqQakGjYXW+1QgSs  
fRIYqPKCyKz/zeE+IT4d10uPueKN1uVHttGbhPCcu0lbcskPao4PY1mBEK6F  
WWM5TSFYXXc+08JRiRr2eoXjLWwF3fXa+8K0NfnP6VHdz1ULe1vDoQJ8EX8  
aGce6iesYI92VQ97In12x8GSa9HI/eV/IE2mJ3hDqlTpuS2wHK0zjBZ5InJq  
Wl8tU4q3s/yUnnc9sO2F9q3Ufju8ouqzun7wwNa2RVmlujtQP3OstWiSBxKa  
Bb2qP2RwbqtWx5bxcT+VUqpbd2E0gP9hdBkfhLEXNs8s/xnWoeIsr0F3ZEw2  
shgpS0DIVNr+uFx3zC0N2JtcnliG8PKO33nu8LtsP/mwxz4cS73TtvXVxL4+  
N3Jr3fdDecEvpncDemNTTtHFh0A9xL7XTDXDbr7P9oa2CUhWjJwuea5K/Td  
jCo3WCfDMXf3fnqKK5L2HvBtNz4I+hSrj0I3VxSdsQhhGKdg3cLybp1uHnjh

ZtLY0RT0bhAUjxbwEDiffjXntRwVDRGH0n14MKk2vp/fnYqo+4ITP3zhwvvt  
bqFlSxoy5zC0Jy5ywRg2nJ/Ykg79cMaJ9h+52K2b3U40ZiCzyjCodCYXK89I  
zwz+lolpSxTr85pd8GCx7NXBywpojjdXnk12QY2g3cmxJAvJg6X+1SIXuAWy  
g20ysyGM8a81G+PgbEnwp52SHDw0GLa9e5mD2DfipT9V5yAtlHvfOY6DqRai  
ANiJFzoB7KsWBafd1KauwspcMHS9XY/1s5FYMD38rG0eiqsalYILbLw70EAd  
K82D1v9mS/pmNnJvISGz5+XDNDsnhmCxYdBZ9iDheD5itIuDTvU7QyKfR2TM  
PYSLorpe8ldnXN9ZM2dhziH4XS07+WG7MyZ/J7120qQAGS8HvivmOSnt/8rX  
51IKMMyyNsrWsvClefHr9yMFGGmWpp5NY+HPO4yH/8Qr0XPmmY+BGQvismqb  
+YNK3NtY4v9nKYGrRfrnnT4qYVNTl6h/ioCzMshF+EmJfaxrD6xPEpifNCBe  
o1XiPxyrm2sKCXxZs3DdURqFH10OG7UoCVSZph+ZNY3CrWnn+dfIBGx2rTI2  
4VBYn3VLU76RwLEtpwvmcymE/j6lriGKwPTloXmEK4WVwX31fZEEaIEKpq8H  
BRvprsXMid/QMGuXZXhR2NSv+LYijIDy5elk/ZUU6rsMLK+sIEBX7zCcHUyh  
9YHTi6fLCSQ33sq1DaXw2qOl+stSArGqNcXfrKYwtD2tkZQQ8MvPuZG0nsKz  
ppP/vScgcCdNI8mPpHAgct9onwcBwT6HxpNRFK6YqevofAIOMXXPajdRk09t  
qFjJI3Bi/bTw1hgKSScim2QuBMzD1r7r3EqhsWTj1KNsAjkB57YNSinkXn0S  
dYNFQH+p9vP4dgp600s7050I/AuXXxwd

"}],

{RGBColor[0.560181, 0.691569, 0.194885], AbsoluteThickness[1.6], Opacity[1.],  
LineBox[CompressedData["

1:eJwVzmlUjAsAh/FBSduUuldDTa6oS9NmaW96/2kYor15bck5hVK2mTSiVNo3

NKV5qU77ajktThiRBpFKoVuupYixhc6oUSly3Q/P+X19FgUe8Nk1k0ajbfrd

/zqNPvnK16IRNHljOLmhhf3y1Nu6z8J+gu06xfDQjiBi25jhF4RfCEWedKJ3

VQ6Rsl029itjMgb6Gppbi8jumX2fpcn8RtLV2hjWUdkdFwr043dCYiXS8z



e7ZdIWofAttBxmyY6YxcLLG6SYyP3ONECzUx3BUk02K0ESe2SN6WZ2tDuS/2  
0HpRJ1Ekodeoh+ogj/PDdFj0kLh9RGL5lDEPMTU26ubOvYT6JJ19SMiEzGHi  
4pWOAcJg607ac/eFaHrj/8Uq7xWh1/9isDj7L+zLbNPQ6B4klrFXVKiEGiG4  
tqDqlr2McP/5gtXLMMHnBVXF77U/ErnHVtgfFjphB59N27HV2lrwbHdL2Sj  
L7awb9h3JhwXhE2UXfKAdXJ6tTROFzaFJ39mdZFQTDXSLSixkdx0qm+AGQA3  
9Qdu2gaLMTTkOUemHISQXs2yBJWlmHR5PGwg2Y2a5pZii5NmSNd7kVTWFir9  
L/hJ8norWI9KUvnn92Oa25KXNmclmmdkDUIZfljKrwfMsrTGwYGD/xl4bjl  
iDTmR9niQK+xBkc5An7XKpuGztgjutvpreSjEM1uHeNHyx1xP5US9z2Kx01S  
ZlHqP2yoBdfu/fPcUWTe9WbVPyGQoaSuP1UTjUtDSVPav4AFFV6xicUxyHBr  
Xs5VXQ2PxmVKZxziYHf23JDG9GrUjneuktodR1dE8N07szhI7+w6PGUcD2Zr  
tqpIwYHy8RET1b8T4By0xPTmtzVQsVWvD1mcCjv8uZyE4bVliI13f0pPgr/h  
La57DxdFVfokk56M8tF/7XrurYN1oC5f8CMZr1dNHnlevR4+hrTg+e9SMHAz  
7qog3g1a1+j3c96klsy41NM0bAPWfohiL3yYho+a7GDCZSOYY2qGMQ/TsV6g  
H6EwdkeU8qmnFp0ZCB1zDDGf5QHfKn6V/HImZndLI/O6PNCxVDiY1HgC9xU/  
anSrPdHs9NTcrOwkPnQIr+jZecHWZzlvSeap3/+VrL4zXqgu4ykOc7IwJsg6  
yKN5Q/Dehbv7WhaUjM22pezwhoY+4eXsIAKvovs7Wr3xhgp7XVgvQmFUnMqg  
kQ9icnUCq02ykdQwLgk55oOP8e1UfkU2dBWRQtsBH4gk9aSeQQ64aulBrq0v  
VF/VdEQX5KB+aL5sj9gXnBQDi4wFp2HqkEw/MOKL64eb5xtlnUajmshai+sH  
pc38plKtXDD3jmYmlPgh7bjvu/PJuWCg+V2Lwg+PWXXT26dy4fHYgc9ew8On  
VuaD70fEsHUsyfPL58Gl5toSQ7kYGruZj5KGeLhapHLBfESMB886RmSfeLAS  
+61kK8SwLO+Zdv3Cg2HCsIv/hBhRfEXvDDkPk/5GO/JoFKSFRXHR33ho0E4/  
O28uhY2p0rZ9NBjLlrfQtVZQyJVsN8c8Evn7K3MNV1HoMmopKNAjobNr1MDC  
hsKT1oqxCQYJms8JlrsDhelvv/bU65PoZ0nXZaymwKr6w3PRIhLil0sTVHwp

cEUy3Z8sEpp9EWp6PApfGvTMNpuTSOy8JTLZRGGS9sbikgUJgcS/eM02CvIA  
rijkOQmPnKwbCUEUetrDYnpsSLSm9XNydlFwmkj8ZG5HwinOtLM0mMLmDrim  
2pMw3XfnmTSMgntRRYOTE4mSoLmBj/ZRiHL2bhezSTC2Bnx8dYDCj]byTrkz  
iSyv8wflfAqq4SUSN5BQ4U6M/wqncKNynajchcR/P3J+Cg==  
"]]]]},

AspectRatio->0.6180339887498948,

Axes->{True, True},

AxesLabel->{None, None},

AxesOrigin->{0, 0},

DisplayFunction->Identity,

Frame->{{False, False}, {False, False}},

FrameLabel->{{None, None}, {None, None}},

FrameTicks->{{Automatic, Automatic}, {Automatic, Automatic}},

GridLines->{None, None},

GridLinesStyle->Directive[GrayLevel[0.5, 0.4]],

Method->{},

PlotRange->{{0, 1650.036}, {0, 154.588981}},

PlotRangeClipping->True,

PlotRangePadding->{{Scaled[0.02], Scaled[0.02]}, {Scaled[0.02], Scaled[0.05]}},

Ticks->{Automatic, Automatic}] \) \! \(\\*

GraphicsBox[{{},

{RGBColor[0.368417, 0.506779, 0.709798], PointSize[0.6], AbsoluteThickness[1.6],  
EdgeForm[{{GrayLevel[0], Opacity[0.3]}},

```
{RGBColor[0.368417, 0.506779, 0.709798], PointSize[0.6], AbsoluteThickness[1.6],  
EdgeForm[{{GrayLevel[0], Opacity[0.3]}], PointBox[NCache[{{Scaled[{{Rational[1, 2],  
Rational[1, 2]}]}, {Scaled[{{0.5, 0.5}}]}]}]}],
```

AspectRatio->Full,

BaselinePosition->(Scaled[0.1] -> Baseline),

ImagePadding->Automatic,

ImageSize->{10, 10},

PlotRangePadding->None)\)      blood

\!\(\\*

GraphicsBox[{{},

```
{RGBColor[0.880722, 0.611041, 0.142051], PointSize[0.6], AbsoluteThickness[1.6],  
EdgeForm[{{GrayLevel[0], Opacity[0.3]}],
```

```
{RGBColor[0.880722, 0.611041, 0.142051], PointSize[0.6], AbsoluteThickness[1.6],  
EdgeForm[{{GrayLevel[0], Opacity[0.3]}], PointBox[NCache[{{Scaled[{{Rational[1, 2],  
Rational[1, 2]}]}, {Scaled[{{0.5, 0.5}}]}]}]}],
```

AspectRatio->Full,

BaselinePosition->(Scaled[0.1] -> Baseline),

ImagePadding->Automatic,

ImageSize->{10, 10},

PlotRangePadding->None)\)      liver

\!\(\\*

GraphicsBox[{{},

```
{RGBColor[0.560181, 0.691569, 0.194885], PointSize[0.6], AbsoluteThickness[1.6],  
EdgeForm[{{GrayLevel[0], Opacity[0.3]}],
```

```
{RGBColor[0.560181, 0.691569, 0.194885], PointSize[0.6], AbsoluteThickness[1.6],  
EdgeForm[{{GrayLevel[0], Opacity[0.3]}], PointBox[NCache[{{Scaled[{{Rational[1, 2],  
Rational[1, 2]}]}, {Scaled[{{0.5, 0.5}}]}]}]}],
```

```

AspectRatio->Full,
BaselinePosition->(Scaled[0.1] -> Baseline),
ImagePadding->Automatic,
ImageSize->{10, 10},
PlotRangePadding->None]\)      gi

```

```

mouseModel2[livervolume_,Givolume_,kBqinjected_,mouseweight_]:=

```

```

Module[{y},

```

```

y=ParametricNDSolveValue[{Bl'[t]==-k1*Bl[t]+k2*Li[t]-k4*Bl[t]-
k5*Bl[t]+k6*G[t],Li'[t]==k1*Bl[t]-k2*Li[t]-
k3*Li[t],G'[t]==k3*Li[t]*livervolume/Givolume+k4*Bl[t]-
k6*G[t],Bl[0]==kBqinjected/(mouseweight/1000*96.3),Li[0]==0,G[0]==0},{Bl,Li,G},
{t,0,totalltime},{k1,k2,k3,k4,k5,k6,k6}];

```

```

Return[y];

```

```

]

```

```

(*-----Next Mouse with 6 parameter model-----
-----*)

```

```

vn=readTac["C:\\Users\\exx\\Downloads\\OmeM5, liver 2.92575, GI 1.03025, ID
2886.csv"];

```

```

Lv=2.92575;

```

```

Gv=1.03025;

```



{GrayLevel[0.55], AbsoluteThickness[1.5], Opacity[1.],  
LineBox[{{9.09090909090909\*^-8, 9.090909090880112\*^-8},  
{0.0874367476365131, 0.08090369567458766}, {0.18222810297558026`,  
0.12746559200130417`}, {0.27073779576926765`, 0.1116266937044405},  
{0.3575112797365835, 0.046963725126600256`}, {0.4516394623155443, -  
0.04509050859182233}, {0.5394859823491253, -0.11115559892361665`},  
{0.6346872009943513, -0.12642564594664163`}, {0.7281522108132057, -  
0.07740196037964171}, {0.8153355580866803, 0.004179083230780074},  
{0.9098736039718, 0.08937493944143977}, {0.9999999090909091,  
0.12834702174618903`}}}],

{GrayLevel[0.55], AbsoluteThickness[1.5], Opacity[1.],  
LineBox[{{9.09090909090909\*^-8, 9.090909090875369\*^-8},  
{0.0874367476365131, 0.07984396759533968}, {0.18222810297558026`,  
0.11939549826670079`}, {0.27073779576926765`, 0.09184904274707059},  
{0.3575112797365835, 0.017913117173780694`}, {0.4516394623155443, -  
0.07109962300031061}, {0.5394859823491253, -0.11717052830989395`},  
{0.6346872009943513, -0.09879571259704382}, {0.7281522108132057, -  
0.022693471356141894`}, {0.8153355580866803, 0.06128703302641453},  
{0.9098736039718, 0.11605625481609519`}, {0.9999999090909091,  
0.10415981267620744`}}}],

{GrayLevel[0.55], AbsoluteThickness[1.5], Opacity[1.],  
LineBox[{{9.09090909090909\*^-8, 9.090909090870287\*^-8},  
{0.0874367476365131, 0.07879243663407876}, {0.18222810297558026`,  
0.1116081822210312}, {0.27073779576926765`, 0.07372482040530459},  
{0.3575112797365835, -0.006267252216927747}, {0.4516394623155443, -  
0.08743897872291118}, {0.5394859823491253, -0.11109134853087661`},  
{0.6346872009943513, -0.06371549528296311}, {0.7281522108132057,  
0.02544576624054603}, {0.8153355580866803, 0.09464282937855747},  
{0.9098736039718, 0.10731931496853601`}, {0.9999999090909091,  
0.0516787429232188}}}],

{GrayLevel[0.55], AbsoluteThickness[1.5], Opacity[1.],  
LineBox[{{9.09090909090909\*^-8, 9.090909090865543\*^-8},  
{0.0874367476365131, 0.07774905743802465}, {0.18222810297558026`,  
0.10409673959866513`}, {0.27073779576926765`, 0.05716133039337165},  
{0.3575112797365835, -0.026084496726167965`}, {0.4516394623155443, -  
0.09591154799603378}, {0.5394859823491253, -0.09685594593277226},  
{0.6346872009943513, -0.02730376120671303}, {0.7281522108132057,  
0.061646715198529656`}, {0.8153355580866803, 0.1046634148537508},  
{0.9098736039718, 0.07509702498429204}, {0.9999999090909091, -  
0.006536873471333553}}}],

```
{GrayLevel[0.55], AbsoluteThickness[1.5], Opacity[1.],  
LineBox[{{9.09090909090909*^-8, 9.0909090908608*^-8},  
{0.0874367476365131, 0.07671378556951527}, {0.18222810297558026`,  
0.09685439581479163}, {0.27073779576926765`, 0.042069810325321415`},  
{0.3575112797365835, -0.042006785469922474`}, {0.4516394623155443, -  
0.09808544986431629}, {0.5394859823491253, -0.07760167026270944},  
{0.6346872009943513, 0.0063643674428021085`}, {0.7281522108132057,  
0.08405712128907425}, {0.8153355580866803, 0.09555213349985489},  
{0.9098736039718, 0.03202960165577907}, {0.9999999090909091, -  
0.054402034659985464`}}]}],
```

AspectRatio->1,

Axes->{False, False},

AxesLabel->{None, None},

AxesOrigin->{0, 0},

Background->GrayLevel[0.93],

BaseStyle->{FontFamily -> "Arial"},

DisplayFunction->Identity,

Frame->{{True, True}, {True, True}},

FrameLabel->{{None, None}, {None, None}},

FrameStyle->Directive[Thickness[Tiny], GrayLevel[0.7]],

FrameTicks->{{None, None}, {None, None}},

GridLines->{None, None},

GridLinesStyle->Directive[GrayLevel[0.5, 0.4]],

ImageSize->{Automatic, 28.4375},

LabelStyle->{FontFamily -> "Arial"},

Method->{"ScalingFunctions" -> None},

PlotRange->{All, All},

PlotRangeClipping->True,

PlotRangePadding->{Automatic, Automatic},

Ticks->{Automatic, Automatic}] \) Expression: {Bl,Li,G}

Parameters: {k1,k2,k3,k4,k5,k6}

]

```
Manipulate[Show[ListPlot[vn[[1]],PlotRange->Full,PlotLegends-  
>{"blood","liver","gi"}],Plot[Through[model[k1,k2,k3,k4,k5,k6][t]],{t,0,1500},PlotRa  
nge->Full,PlotLegends-  
>{"Blood","Liver","Gi"}]],{k1,0.001`0.2`},{k2,0.0001`0.1`},{k3,1.`*^-  
6,0.01`},{k4,0.001`0.2`},{k5,0.0001`0.01`},{k6,0.0001,0.01}]
```

```
Manipulate[Show[ListPlot[vn[[1]], PlotRange -> Full,
```

```
PlotLegends -> {"blood", "liver", "gi"}],
```

```
Plot[Through[model[k1, k2, k3, k4, k5, k6][t]], {t, 0, 1500},
```

```
PlotRange -> Full, PlotLegends -> {"Blood", "Liver", "Gi"}]],
```

```
{k1, 0.001, 0.2}, {k2, 0.0001, 0.1}, {k3, 1.*^-6, 0.01}, {k4, 0.001, 0.2},
```

```
{k5, 0.0001, 0.01}, {k6, 0.0001, 0.01}]
```

```
Clear[newmodel]
```

```
newmodel[k1_,k2_,k3_,k4_,k5_,k6_][i_,t_]:=Through[model[k1,k2,k3,k4,k5,k6][t],List  
][[i]]/;And@@NumericQ/@{k1,k2,k3,k4,k5,k6,i,t};
```

```
fit2=NonlinearModelFit[vn[[2]],{newmodel[k1,k2,k3,k4,k5,k6][i,t],{k1>=0},{k2>0},{  
k3>=0},{k4>=0},{k5>=0},{k6>=0}},{k1,0.008`},{k2,0.0001`},{k3,0.0014`},{k4,0.001`  
},{k5,0.008`},{k6,0.0001}},i,t]
```

NonlinearModelFit::eit: The algorithm does not converge to the tolerance of 4.806217383937354\*<sup>-6</sup> in 500 iterations. The best estimated solution, with feasibility residual, KKT residual, or complementary residual of {8.21541\*10<sup>-12</sup>,0.0000102634,2.43713\*10<sup>-12</sup>}, is returned. >>



```
FittedModel[newmodel[0.0778523,5.86338*10^-13,<<22>>,<<23>>,0.139687,5.86338*10^-13][i,t]]
```

```
{fit2["AdjustedRSquared"],fit2["AIC"]}
```

FittedModel::constr: The property values {AIC} assume an unconstrained model. The results for these properties may not be valid, particularly if the fitted parameters are near a constraint boundary. >>

```
{0.804901,888.829}
```

```
fit2["ParameterTable"]
```

FittedModel::constr: The property values {ParameterTable} assume an unconstrained model. The results for these properties may not be valid, particularly if the fitted parameters are near a constraint boundary. >>

|    | Estimate       | Standard Error | t-Statistic    | P-Value    |   |
|----|----------------|----------------|----------------|------------|---|
| k1 | 0.0778523      | 0.0321191      | 2.42386        | 0.0181045  |   |
| k2 | 5.86338*10^-13 | 0.000540747    | 1.08431*10^-9  |            | 1 |
| k3 | 0.000661118    | 0.000233858    | 2.827          | 0.00621282 |   |
| k4 | 5.86338*10^-13 | 0.00363224     | 1.61426*10^-10 |            | 1 |
| k5 | 0.139687       | 0.0583347      | 2.39457        | 0.0194876  |   |
| k6 | 5.86338*10^-13 | 0.000423265    | 1.38527*10^-9  |            | 1 |

```
Show[ListPlot[vn[[1]],PlotRange->Full,PlotLegends->{"blood","liver","gi"}],Plot[{fit2[1,t],fit2[2,t],fit2[3,t]},{t,0,1501},PlotRange->Full]
```

```
]
```

```
!\(\*
```

```
GraphicsBox[{{}, {}],
```

{RGBColor[0.368417, 0.506779, 0.709798], PointSize[0.016666666666666666`], AbsoluteThickness[1.6], PointBox[CompressedData["

1:e]xTTMoPSmViYGCQAGIQDQEqDi9fHdx2e0uuPYRv58CAAjwdXhZq/tj+Kw0i  
3hDoIBTyQrxhYS6UH+Yg6yXfsLU4AMqPdrg3X+F1h50ThO+Q4NAy36Khbq85  
hH8gyYH9auIDEQtjqHyqg1VR97R+Dz2ofLqD2vTv8maTtKHqWQ4d6w8sZFyi  
DpXPcTj2LvcAxzEo3yHf4e7zmoWi51Qh/AcFDr9rzu1ZIKYM4SsUOTh7imXp  
HIXyF5Q4HPuZLV5kCuUnVDjMan8Yy6sDU1/jsEbqzZwgBiWoefUO6qEns0x+  
KUL4FxodZjIM5dS+QdUXtDv8Dj4p0fifHcLPmOCw8YGCP9N/DghfYqqD72lX  
VskeBodD4mrBT4/PdFD54Nqs6/nbHgDtE2yd

"]}],

{RGBColor[0.880722, 0.611041, 0.142051], PointSize[0.016666666666666666`], AbsoluteThickness[1.6], PointBox[CompressedData["

1:e]xTTMoPSmViYGCQAGIQDQEqDsuDgqfqHs+wh/DtHErikqevuGcF5Xs61Fxp  
2Duz0c4BzG0IdOCV+qVe8SAByg9zWGTL3C9SmQvlRzscdtSwdNSCOE7JDgs  
+jN53Xm2Ygj/QJLDl60Vh/4El0DIUx226rDcyxMvhcqn0/DbWa43WwzlO2Q5  
KNRoXLxkWwaVz3GYeeHkd8F2KN8h3+E5T/WELXuh/AcFDscbw0//fQDIKxQ5  
WG6OXZj/HspfUOKgceGMxSbucgg/ocLBfPVMgXffYeprHca+rbH/Ggwzr95B  
v/tj2684qHsuNDolXq+2Ds6Aur+g3cHqe8buzzeh/s2Y4PDJlqyYiz0bwpeY  
6pAz48+q7dtTHA6]qwU/PT7T4d8jDo45jQkOAB/CehM=

"]}],

{RGBColor[0.560181, 0.691569, 0.194885], PointSize[0.016666666666666666`], AbsoluteThickness[1.6], PointBox[CompressedData["

1:e]xTTMoPSmViYGCQAGIQDQEqDo4HMh/MqJlD+HbOWiZPSs9ougN5Xs6WF/1  
2vZlqYYDmNsQ6ND1T+hlangglB/m4PrYfrLxIx8oP9pB5KmpsuNMTwjlfcHh  
6/zPSmuk3SH8A0kOhx5/iVDPcIPKpzqs1zn5QlYayj+Q7vB5XdWBPQww+SyH

Sz7/V39UgcnnOKy5dMYzboMHVD7fQf/LBCebq14Q/oMCh1UXEq1azvIC+ApF  
DhtsnqqEbYC6d0GJQx/z+mm/i8Ilg/IQKh11sx8s6ZsdB1dc41C/alHhWIwVq  
Xr2DZtO7Rp+SbAj/QqPDEja9V3yOhRB+QbvDc+WWRSYrKyD8jAkOyqGnFF9Y  
NkH4ElMdQqY7XYus6nQ4JK4W/PT4TAe5nfVlii19DgDvq3Zv

"}}}, {{}, {{}, {{}, {{}

{RGBColor[0.368417, 0.506779, 0.709798], AbsoluteThickness[1.6], Opacity[1.],  
LineBox[CompressedData["

1:eJwUV3dYjv8Xbu/d2x7ae+/h/bynnfbe2nvvvYRKiSQNkoSWhAoNPQoNSWih  
QpK2KH1bKr9+fz3XfZ113+e6nnPOR9A7wsaPhliiilyKiOj/3+N/PqxHMRIR  
fjPNjK+JFsLXiz8erMZ/JhBPt4z6qxdAxBfTGP8T4KD5+ut+vA8yPGdM1zn  
3CJc+8fi9nEpB97Oadqdjz8gUJ/8oJlUfRbym/sfsAaTwCuazvSHRafhfnS0  
+jdOCtjdnr2h8ugUjCrxYU391OCTIVSqQZ4J2xv9+qnx9JC4oTH8Zj8VCpzb  
f9wuYgjycr+yGs1kuNHOUe8bzAL5lgohs+0J8JDLNzRaBwfV2zRWbAlx8CKp  
Xf4TJzvUb3wgiQyJgfFPDH8lvzkgW0SB9eGlKFjQ9H1c088FjEV7CXKDEbBb  
3p5Ef4MH0hj87tc9DwXaPQZ8bDwfVA7Kl9CTBwOviy/RlPkxuNu93myaFwAc  
n6e/VRUJgMOpsusUZn4gUjCjZ5cuCLvHEsXT9H1AEq90hzJYCP9p/7FhHuB  
0s9pik57Ycgi5J40zvMA7es5geE6IsAXdktmP9cN9M2VBgVlRQFul6R8fucM  
5gfT0uOcYsB+ZicE5+oIDvdyCnLjxIHx22iutaA9eJxU+qX9WxzqUgcYP/LZ  
QiD9Z6tfUxJw3rzBN83UGqK6cpqr+yWh1vrVPSITS0gOU8I5tEjB6en28m5L  
MzjN9zm0+oY0iC7b3GW7fgLOv8n58DRPBiq7pIKQjBFcSVPSjlyXBf3NGL7f  
W/pQKfv5qrC3HMTHgkTmti7UfM7ZnzCXh3sBjiPDEjrw0ZBLvdpXASSmrV77  
0xfgunLta2WRAlRbNblvsx+Hma0XhYlUiqC8yFLQFqQJPyzKdWzSFQE6kjRe  
HqjBck34hvSmIgs23NT9PqQCa4d6t8iDIYBbd00/4b0SbDhw2X39qgT733gm

fCkUYbtpjazdXhli69nZBYbIYJ/i5aOi18pAItlOdOuLNBB5lPuH6qhA6p1R  
1W41SSB7Es5h+EQF9MuP36t5KwbUjPoDx2RV4Q8o4WRviQBDAFFsbrUqRFNH  
ULffQKWZ2uSo5xq4ER4egLNCQA7x8vJxgtq0Gq43u1cyA88EeX52WTqgN35  
bNdVwwMC/eHHPZPVQa2lwV2WjAtEjun/1PytDqNWRCqLN9lBlOGrktVfA06a  
R04MJOFa9u2axc8pDejfCfppkM0CSuIv//VZawJ7hPhj9+dMoJZR/qCqXxMo  
rEVG6WwZQOtDuFcyXguqqcKnDSNogSCvz2LXogXvSMaHSUaoQD+H64WspDaU  
5zQ0nI6lA00vazGUN7Rh0196/rEVGZipvxT5hjsOfQ86aAS8SMD6Yvl4R95x  
OMd28LyniggcFsKzi4nw8F47v12T/ZDgQtBXD4/Hg/NZj5e6Gn8JcjlSlYpb  
eKhxeNngHLJDIHnLRP5fHAJtD7Y9hcX/CBPs2yFt/yHg79CJUq39Q7jr/nkk  
JY4Ar5bTZUpvrhMya15oEv4jgM8luUpk9S+C1Lad1SktAB3RKheC1yoBxzNA  
6pMMwNK16/EqbolwiLSf6HcADNDMJ2l+mCsejcFi+0BrIss3r6dNkcYyRbk  
p9LSAce8+8H/ec0SnjYUv19K0oECQdboN2kzhNphyrOv23WA4eMrtfmSz4Si  
jWSNe7s6YB0bl1iUP0lIZV9buaCpC4ui6yGR7z4Q/LW8bkQm6cLWWdlutZPj  
BCv3MRubdl3gudRzMUdqlKCVZUShsqsLtfIHRV2K7wkiNR3tbJp6EEczrIF9  
GiYwDMqGbSfqAYOGNUHt3mvC7s8qgU9teiDJGP3MYGyAMMeMG+vY0QOuFxaF  
VoZ9hGHVnJwKDX0IYi7qq/37gtDmvKeVnqgPHxdt3jn+7CFUp4WtebTpA8eV  
w11ptm7C+ZszN3V290EVBC0ppamnhPheW3thDQOQvxRQLfm9neC51EdFnmgA  
9AJOsic1nxBM6bWezj8xgL+yx1XujbcS1BTvRQxsG4C1uqX9+oNmgoC9gHCD  
uiHEfiX5WPvvyAYEm6fJEfolhcLqQP6NgbyJsVIDkhT0xBKG0vt1bBw2EL91J  
eMttQ3A8Xfy2S620MDC3+ltB3QhsHmFk5013CM1UnrdZEoxAWYsq5WvqLcJ1  
mVHHzcdG4GzS0nQ95SYh18qQdmLLCGZfSt8wc79Bi5tx56oGUOQ9l41v0gF  
wa1MJro83hh0Pl3u/IPKCYZPb4imPDaGgdXRfdKaEoLCDMsnty1jeGa+Nn7G  
upjATZZ9HqmdgAv0ZlmuWkUEMoldgkD8CbAfJKydcCkk/DIN/UP8+ATMe5+m

lnAsIExGfK35/t8JyCruygu2ySO8vGzj0qtqAsRSzL8Fr+cQmp700tfGmUDq  
1w5dVfmzhLlpjZ7cRyYQfsHoNoH4NCHr393Y4P9MwN/feLSF7hQhVPiYhJmq  
KfgbvCCxLE0nOBgVTcnGmULiBALvWVQKQSeE/CLjI1MgkdNWe1OZSJC5mKi7  
vmkKc0QXmRzY4wnsLSv/jaiYgRcNnrjqXQyB6IN7fWusGVBvtdG190URlvfe  
u5W0moFR98QDrh8RhDF+A6bETTMwHnNJoLweSsB02144q5jDxot2XPjdIEKd  
v3SCdqw5UNEpZVtRBhCK8iqI+FrNoT22yXi0zpeQ2sT85fCPOXwVXKpsyPum  
+I+cuTSjbAE1c4oMF6o8CVZb2/rPYywoAo2oRUhk/SdDmDtm51WIBhw3k1mde  
uBBezsb9PvHLAv6jGQ3+T86JYHY3c/GXlCXopE+Ri07aE8Zj8meu+FvCZGnB  
5hhmS3A/XvJRu9oSTNeaBM5+sCYskN189+2zJYxTlrxVPmZFaJu3n3tBZwXH  
XQreXRUyJ+ybuM6USFlBQqMq+zVbE4LOfc/pIGMrmH/1NmD8lREhm9X/43F/  
K7B6/118IN2AMJgQMsZ4xgq6n+qWQ6gegWE68t3sTSso7zS+uHheh2AD8UOP  
nlmBDWm30+UnBELJ7ZSB3M9WcOdtJEVP3XHCFNWpl65/reC5hcaLsz80CQJh  
2d1yXNZwjiBy2dVfneD7Pv8psbo1BJTO+c6lqBLqVC+1jdlZQ67chh4TjzLh  
Z3lJa220NSy5xsmd1lMkKB1ee5BcaA0zrtmEv0ryhHjvm43mTdbgJrqu9VtB  
htDRV1MnMGQN0d9mqDSTJAmHUo23/yxZw2ac+V4BmThB9+LDqj5KG6A9Q7EU  
OyRCyPnzuKJc1AZyKNGg8mshwpDj07JQPRvYn7iQ7vhXgMD0tKeY4GUD7vKa  
FtkP+Al2Av2FLBk2oInCGDk6eQhlZ4b0/6iwdg2ngvrFDfyE6cX3uW0dNqAd  
Gjiid5udIGj+4Uz+RxtgEKzvyYzDEfwfTme6b9kAZXdxTE4qC6GBbTZVEWcL  
BrFvjvu0MhHWkhYSyZRsIU77hl+LAgNB+ctq7AdLWxgKHxtHMKIlJOpurDaE  
2YJcPbqNfA0V4WnNdmhavi2kM08E/TKgIBDRHgRa1dsCOw8DqZgAGUE/gSRP  
uN8WmrWo32TJkxByRym9tuZsoeaZqGVPOBHhjTr9yVckdpBec5bFoPkAsVSw  
OFcl2MHHykqXuPE95EDEaR+B7KCaA5/sSNhBV335rHXD7IDq0mnd8cX/0JcB  
IXO2ZDvIZHtFLTX0BwnJSpXyLLUDv26r903f11HAJVmDzkdHON1whV3qN2r8

T0nnwqgduE+v8lqq/US/nTXwXut2UKqXgt3xW0YqGF5ThdEeBgVsQgQnF1CS  
kJ4qpaw9xP26AP+d/4GwbGPFsRN7eDt9XKIr8TsiWTGXvRdoD8hRYIO87Bsy  
tLSVzMy2ByvmxMXS119RXouTqO1te3jfmqW0TGNhjncBcWe20NQY/JE0X+f  
EGuqD9/uV3vYd2zsNo37gJxmArmGDuxhQq7WLkRpHFXoh7Pd4HEAtbt0r6LF  
R9FMXQxztKYDbKqTBPBZvkci9En0Bo404BT92FDG+C0KjEqn5oxzgfSawn6c  
/hC6N36afKXIAxYe3NHtzHuFNjTPEWMPHOCQJXy+G9eP1CovHBQOO4CUQIXv  
2cmX6G71hsrwigOs0Xf63Z15jgRqHUJpqR2BVxV3VZ6jB5Xc7bhILOyIzNax  
76/9wRDtA/6ps3q08FQjnTSS8inKbM1ieeHpCGITp35me7Wjrbb5E0TpvjDE  
Q46JY/8xCukyOYW/5gg726eOubxvRTM9TW3JbY5wJggnGjnVjOz7WH4/GXeE  
Lye7KQxxD9HgYLz4fxuOMGLHVt/wqwnB20l3JSYnKExN6P5D1ogejaKSCFkn  
yGfW2Ob3qkdSH6vfNJo4AXe7hn/kfg2qmqYgXw5wggOsguzSu9uI7VvwcfGz  
TmD2UUBH7FM1yvsvxHONb7QR9JuJcU8w30b8lpbs3nzmB73WW6TOrlSh2rWT2  
y7QTRC7/VA4iqUDLG3tcvHtOYCW/1H70vRx5bLtbO3M4w1pAbCr53xI09vd5  
bonKEb7479zf98XIhEi8e9TaGTQu8hVf/VyEnpHlbzNFOMPWpqTsFuclpEL9  
S87ivDMc2l1fDPh3AdXT2/rn1zsDTZyi9hb3ecTP8uT6QJ8zxHpIdfxIOYeK  
2XnGyeec4TYm0tnPIYOoeTL09IhdoPf65MvS9TMo/dh3vUx+Fyg61RP94TAL  
bQobpXRpu8Dvh0m0TtqnUJDE3eY9JxeY+Wl4d1wnA32RYVxWj3eBFQVM/rIN  
KrJvJBGMu+wCkq7X86mqk9CA6gen5gcuMDc0UPFPKQEhLe3CX29cQPicadPi  
v1jUgm70y6y4AOWkt34sQyS0CP9F0TICjHUZt9tVKJQpVGAWq2oK8glHCa3  
8EcgvRpxYXO6riBrd5flt0goyrWSvyPo6QrHdxSlahKC0IHd5Wn3NFfw7MKp  
yjAGoGjnbdaKq65w42Cq+tN3X7R40tX00xNX+MlCp02+5o10ej/LYh93hf05  
T5yIqBca8RfusN1wBRUprSfpZB7IOCRnvZDRDeRPC1ltUbuhrogViWEZN+AZ  
T/7T5OKMIgItPWIn3ODzMb2bdVsOqDaxpdQ4wA3ifVKcv3+2Q7xpHG/PnnGD

R5q7nTUktqjoVArFi5tucHF8Gl9vaY0os7/iiZ65gaWL+j2nc5YoNU8vDj/t  
Bl8yQ+g8X5ihjQu1jcm7bvCY36E80NwEBVymnXvCfhJEU4wCCOLGaLo0guc/  
5ZMgP/NK8oe6IbKuGLVRsj4J3u18d/bD9FFflXpeRPhJeEqh9+nsK110/M61  
nsb8k6A4oNmXaaKDhtb/21mqOwktf0k/Tn4jLEmHwXxvpPAYtB02yUZjyqa  
+wN8v58EgBS06wL+2oj5ifSNm0TuoPGEk0LvuibK7rw48YXPHczuBQbwsGqg  
X38TUkrw7jDJqPoJu6GGnI57Clicdleq1Mvll06qSKpLIbirwh200d+ZVJEr  
o8sHnlxxT90B42T9EjytiPbxxK0y0+4w1feQzOu6AvJPX3Ka++sOT9i7jnVE  
yqG32PuDazwe4FZZejNaSxpp/GuvttX2AN0tR8WqBHFUTag2onX1gLVf3lHb  
lMKINjNv9XmyBzR3aFG5lPCg207oS8lXPQDBA/mJ0wzoM5GrmlKHBxD5t2dj  
G2N4Qx29qaVPHuDpde561zANRvftXFEjnSdYqaYUZ94Sw4D40DeX1xOGbh/L  
sTWSx+IEo9V9ZTyh2MiUeVdZBfvi5TLNY+YJ6TcETZmOIYw1a7hp29UTxuUW  
vnd162DG1bqnRkM84S4lGd9gmT72cFZKLD//yJ9YuJC61wSbj7mx43/NE4Ap  
vliBzwLjFmZ9rXv3KL6d6l3feyvMUi/nOn+nJ6S+LxtWv2eDnfH5G7E36Hl0  
D2kHJ+baYW2nI3QnJj1B8qninbV+e+znre+45mVPWHqSxPmEwQETeum4ULDn  
CefpCswpGewxh7nX7UE0XpCxrs8zPWaD5ZHBeQNuLxgLw7eR2lphz0Ra3QWl  
vEDOhtlqu88U29SXUDzQ9ILQK2mVq41GmIRfBemne17AxFJ+zj5aHzt5lmmi  
1dkLlk61TqU26GBFd87UFQZ5AZWVLD/vG4T19e4khyZ5QWb6p/nmCG3s749Q  
c+NzXlBnUdcv/EUDU6D4dkyk3AuUlrj+mdxUw3zF7Df+1XnB4JxGEC5dBRv2  
x5c+GfAC2dHm6jkqBYwk52HQ5Y9eINSIHA4WpDH1WtHjEYte8P3W6+H2f+JY  
aH85g+mOF3wroLt/6CSCVS3Qfx0j8gb7YOLt138EsDHKrBYSTm+IMzH5ca2V  
B6OW2Dr7RdwbqmWV2sQU2DFkHOzUoe4NGtyX7JALMxYd+EWqxMgb5gSGY3v9  
aLDaXJuDKEdvuHgscFQ8lhSbrut7ax7gDYtEAgzUEX+7mF5pVUsmeEOuNmWt  
nvZ6l8FSUyx5jjfsnLJMjPCd6UqmFjb6VuINROm+nra7xV1NkqVcXTXekKF/

7/Jw+if89x00q2WPj/yZyZV+vV7AcwZnYLF93vC0ozpuTuI33izvT6HVhDfA  
yOx+iNMf/KmGAB+Z+SN+XS+mpNv+wz8enFKl2vIGuxDDZz352/jlZUuqOXIf  
SBwIsXvNvos33FxaeYDzgWnl/dL6U3v46oPTb90EfUDhbk6E0rF9/CEff4uJ  
kg8Edk9Luokd4l2Z2ko4dl78SX7kMQQqoTYum+Q5Sx9IpWDseSRGgnDCqycf  
uvvAZsvol8owMhQpk62THuYDDnZXaQ0cKdGQqoCoaaoPVckMhgv/o0EShA4q  
znwfeHtpUP5RjiM6Y2y3OlfuA5GexJ0dKSxoxnrt7c06o/qkYa0Rz9gQ3jW3  
Jf2JD5ROTHGol3Md3XNCpaZ9PnAinThpmJ0fbYU9TeYc94Hz1Zd6mssFkU2C  
g/uP7z6Qu99E991dBDVl/tZp3vABlrJd0yxXcUSTlyeaQewLCqXnX2kUSSH/  
yyLUZky+4Fac/bajXA49r8BWOY/5wuwqsZ3htAI6VuP07oesL+xVF1p0TSih  
1PsbLc3HfSF+Ki218I8K+th2vjTD1BesyD+S4FTUUEHrbneuIF9gXaa7lyp6  
HK2OuejOJ/iC1mkyHppPCBl/2RRtyfYFFb/3WkOTgIjXJX6a3faFVxezdc9s  
6yH3vefvuFp8YZX8r86JWgPUQXqydb7HF9QefiVWDzdC0eyXUjK/+sKXs+z0  
qvqmaPiYtlf5mi9c8aj/taRsjqQke3W5D3zB+xhlj2qZBcpW8hBboPUD3YKF  
x1uKlui79i51K7cfKBy7e1bulQUCg8s/MyX9gNe0+dsXUXNUYSH73lzDD5aN  
bvqfumCCdhz7W7mN/CBB7cLFeswI2XI5IS3Y+4EFEXE0/W999CD4b0qrrx8k  
694wCXPVRXSxVzxOxfhBYWLKCWINQIFp8noWWX7w0VH4kc34cdSb/UqM551f  
9PqRXZdu1URChT40izf84LSHvE3QMXWUXn7ws7XJD3LPaU4vSKqiyerS96e6  
/CDU4nz3+WllpNao+MhiyA84TGhOun1XQkWPXpfxTPmB7Jlq8k4mJbSG+aUu  
LvlBtcWpgMfGiqj2fbleFqU/8I5xnWH4JYflppTFLdn94eZj9c/3KGSR59wb  
Gl5Rf2hlorJzl5FGnNvEI490/UFQuvvqxk1xFEtU8SjL2h8yVmqDJ9ZF0Ttq  
tXJLT38westQKOsmgmRY36XyRviD38V/hYa/hdA53mDPpTR/ECOTF5dpEkTz  
omT6j8/7Q9lSts2XKwJIV75S/PQ1f6in1BbrsDiGKjU0aK0a/IFtKNCN9yUf  
2tMZWeNt94eOR7crmMJ4kVWQHXLX4K38Y6NBSMBXhQTWFecKKn/zBNDhsEFFx



o/0n83jtjX/QfXk8ZIWTC9l+1XUy2PWH6oE6FmsHTtRAcSPakjoA7qtKf5nv  
4UBEcN/PO3MFwJ5o6+97ThzIwd6x1kcyAHqTh2+YMXOgxtSWnjDNAFhVdp11  
nGVHJLcZpxNOBICptfp93+fsyOl1yNYp5wB4OWJwQFnHjpo2+pnOBwWAdjvf  
i4lz7licW0S6JcKAPIkTdvzc2ZGbTqZB1bkA0G5yvmzCy46aA6c9GsoD4Cb2  
M4+rgw1RFWokt9YHQLAS60SAHBtyf1JcjLUHQDR1Q8hgBA61fvndNPAqAK7o  
FelOxLliGgrzVyOfAqB55q61gAoL8pSt/z69FAC3ZyYu4m8zoSd25IfzuwFg  
kj2/cDaBHjGkenGuUweCFdPzpbxZKuR7q0vpL1cgBHsQsbbGk6KOQS5zcqlA  
AE1VL2mLPTzTRlwAo1YgeFoWaHdcXMT7c42c4jIjhMww888Rjwa6noJchbBL  
IFRZG3SFz/zpYgnMeywbHAIJC1f35XCkWNDF+XfqyYGw6DQCHUT0WPdj3RWD  
vCM8IzfY8JUVY/9SSW529cj/j8QDrJELey7jqOXZEQgWX6OIy62FMU67Frv  
wUAwrnRbpVgRw8JTGcNiJwNhwjrefeylFPayOuRc+nIgOEiTRXt+k8N4Bvtv  
5e4FglLTHYGzNxWx6HVhrIgmCBjyjWM4t5SxAc7MjxXcQfBcnx4rj1DDYgM0  
6B9qBcHww+xIkQltbPBCsXinSRBklmRun09FmMDj3zq9LkFAlNqcSPYCsPjP  
Zm5vg4PAX7b8k9tdHewNWX38p+QgMI5g1dpe08FEZMgvfc8LgvrL5NKvvXSw  
ZFuvuz+vBkHTOa3G108J2Lvkrt7thiBg2ovqTejRxsSquWaIO4Ngq9Dtw85F  
dSz1Vdwe7esg+PRCzyomUxkb+f0exz4VBIFMs8c5JuQxCU45eYGVIAgir3Q4  
Sy2FZRdyTkj9DYLMwaSpHnJRbMJ/3keFNhJyKFNvIT4IYDIXdNMRTzCY0GjN  
/CDwYFmPKsuMpYMh6HbrWyDjwD507zXbaAdD5Q/7W398cZgcmeMbN9NgYOIZ  
ctj0YMHOSLcs+LsGg9M/1nmGK0yYYnIb0pKMBhSVl4zT6TCcm/2q53NDwb5  
D/LRStGk2JcBYeuL14JhMSRbcnV7vyuPY/rsrc5gGErt2Pbfn+3avbDQ5f06  
+Gjf059XFkzvCqT485/gVDBkju+lJf6hp9IO5T9thwMRTmr0Zyhv/EG/1H7  
V+0FQ8iIZcIN7W18ayhbpQdNCJjyvVnnYDnAC80JTPBzh8C2stJ69zYRuuQq  
w/BFMgQonERbHu2RIKJRdcPrmiEQo3RupekZGQo30Ut30xEC6QzhFAYnKNDn

HovHPM4h4LQ6SppYSonMNF3WJgNDYOF1x3ejBirU8cBP7GpiCNzRDg+KP0WN  
JCWi3J1zQ2BQjZ6li8Gld1lLeEsC4EeX3+bU7k0iIljd/hDbQicKJ190fWG  
BsVduExR+iQEIKuWSTV3adAc+Q3k0B8CutYL9QrstMgmrSGe7UMIHE/VsXZR  
oEU9m4+axuZDYGXDq9jclhYphPbMX94KAfach/TVebSo8vsQvy1FKCTTIDv+  
+kaL6F0/OrCwh8KaxSm6N750KHXk+4X3oqGgIDbaN8JPj5ZP/OorVA2FXa9t  
gTIEBuTcs3doaRAKcmMOj1r9GdGABoU6o30oGlrLMs6cZUJqD5gjh1DwdFa  
9a9EPjO6I85XWxAbCrbW0ytEr1gQ7obEV7MzoUBX2NCkbIBDWewqHHTFoWAc  
n8lUQM601gsllq9vhYJIWNOXj4ycyJpNCev5cieQpFxnogbdac6PDvxIhSG  
3ja+oKLIQ/hNr22q0VAIVb2pzbXDDWGhMkPzIZCEa3qisYlQcT9PTEgZyMU  
fv/qe0NpJYzOuZy5YUGSBtVpJ3q81EXRzvuLH8hZwoB3OeOFyglxNN5dY3RG  
MQwKVdIWDv5II32N5gw9nTD4mLFH+65QDjXf73pCYh0G2Qsr8qX7CkhQ/NWv  
Hs8wOK/i15SsqIQKK8fET0WGwcN2Pn2WYVW0yDbjcTTs4HaQq3NttioKK1gp  
/XcxDH//ltVcFNHJqkkVOn3w4AqhzT/wEsbt+hB/yzMKhaE70sV4xHEiFc  
ifvDYcCSo8qmsEBAJbMiDzq/hMGp/6hz92V1ELmLwmLyWhhg++2195N0Uex7  
bQGtwzD4raPRPXJLD80aGznt0odDxBTfWE+QPrLutis4wuHhux+u7oGfdSt  
7j6QIBsOC0RFLQ8N9JHc/SAidXw4Kpmd9qPm1kPXxeI0tszCYTaqjUXKVwfr  
VWZGPnILB8/YqM07HASUzHa+LjY0HCpmFakOvLXR0vnSGeXUcJArnKwWFFH  
TmS3OP/kh0PW1J0YV0F9aU0WTVfC4c3f6MWBOOUkOqf9tyou+Ggvb0xzGWq  
gIZsV94LdhzxTWKrrtKWRd6tvDwjA+FA0msUyX1LCu3gLHyZPoTDzDPHVlKf  
EuhCXMY9pflwUDy41//xtzgSmXiwNbsZDjYsnT1jpuKoU22WcJk0Ar56P899  
PiyGbEpZz+mxREDSvIHhNycxtLitP/JHIAK6i/uFI1+JonSneJ7b8hEQ/7rS  
24RUF0Haa33tUAS0bcubZYuLIJ1kmu1W1whg8ov2y/YSQh8ntcEvOAJEa4Sv  
mCQIonDtsHNsSRFQopeneDxXAJFVVI705kSAOb0n7Z7CMXR1/y1PfeKETOac

reVN5kMKJ4n9x05EQB1lnXT3Og/q61JqmmiJgMfn+0vnSrmRG7/vdvbzCCDn  
mFs5F8qF/qRfAfX3EXC25kD8QQQnyvvad27hawR4V26+iL3KgQRgZ6R0LQLo  
DZR5Jj+zo8dVkrzGBxFQry1y1kWTHdVk3lPaJ48E1ax+4q1GNrSuYOhorX8J  
Dzn5LjVqsKHj376kNOIiAulx2qVP41DupYQqMt5IIGbvsLhUhkOjOky9bsKR  
YPkvQiApGlf4N+qWWqUioblyKzbBAoeCq3UY6JUi4Wkjzc4bwKFHNpNKfpqR  
QDYbal/hcYiINMaxCyKBZ/uNRp4ODpm20KayGUfC5dtb5jHGOFtic7sqzDIS  
SG7dgM6jfN9Y8b29DpHwt+Hs01tWOCTzcnYjzz0SmOP8wsJNcCghNpwh3i8S  
PrX/PXTTWKHnIpTKw6GRMK9IzveQHycYxm84isVGwosrKKbxGytyPquRmp5y  
FF/pe6/wCiu6rfq+aiIrEjxIVRjuyLGi3z+CeuXyIkEmPSiVu54FaZeQLGdf  
igSF/p5APWIWIG14jeFrWSSslewuCozo/dbysrqVZGwe+fNnTvaTli3dsjx  
Ym0kDDv/d+2IDAMKcPRLXWg60jeQzFmbQYuaKQ+rCI8jgeq55AQhjAodPCnp  
Le2KhN/mYu+pScmRcaD88q+XkcC5zinEj4hRMecAg/FQJHgyMTCuKe3hvw54  
KleNRgLT95UMPoF1vFTSruPOZCQQWThZ7s9P4+Mli1KtZo+wjEFPr/VQF13e  
i16i9UiYmX2UIjT6t8tRy23ZaScSdpJkn7I9JsOqlzcZHv6LhEZi5fU0cjrS  
59UCZWrKKGhjKx40WGPgNEzFnLwYooDizQ7kCrBjp/9iqe1sUSC2c0bh1jVu  
bPiu401mvijIXvwwTdv7GOZHd265RzoKGu93TW7/FMGaXmc1tClHwZ8XK5c7  
qCWwrbzU4PvaUVC5cevpvKM0hkzipWr0omAk57kM+6Qclk0duVxhGgV1C8zu  
68aK2PBAUMNl2yjAxJRCn8ooY+y5PsF5rlFAnot7nnhTBXM30il1yicKmim2  
x7KCVLEaCsfhJAocLNWznexVcXWeq0awmOi4DK78OsMWRVM7axJsF9KFFQF  
DPxi2FLE0vX1pdxOR8EKE+eXH2/ksH5StGyTHwWD9ndnTM5KYkvw1BtOXI6C  
qC0DcpUYEcwpSzEYrkXB05K+Uab1Y1iVjrSU+q0o2ORgPmdZzIktEokuy96N  
ggvvTClAmgVT6OZvEGmJAiXlr4OZ16mxxAzOYJ7OKCB67l5v7kiMdSMWKZYY  
UXDfZodKrH07i+qQdpnq9RG/w2Sf/J/rXVzd5A3/RqJgbc2D1FVytass9V/Q

1mQUNFgt7X/Xmu+a0d6V/DkbBSVb0kRDqjNdkn83lr4vR4FuwOkWl8x3XdEd  
q/WTG1Ewc1tQ35jnIb4jaT7o/V4UrH4aB6/7n/AmO5+WMJpoeKmBXz4Wv44v  
ejJa/4glGiYqrdv0xLbxk/Fvghq5o+Eyy+LFZ1/28UJq/ZK3hKKhFulU69MS  
o+D/upfKpajB+aeiKLULKWpu7agvVIqGdVyf1T1XcrQX0xqUoxUNC48ORBSZ  
KJGucpNkum40RAcGjzAlUqH8jdqIWJNoYHSjL+O6S43GHt6sD7GJBvOMtpq0  
xzSIN+pakLdLNDcNhBwev0qLfbWuSDp7R00anfgNRwc61Pjrwpl8BE/ipXc  
N8t0aLMpt94wOhqUPKaOMTjRo+PhWUH45GigaHqN/1BNj87IpkqqZEXDbtC2  
lNAIPRpajVuSyosG03jaoJVVeORrjKgXLlOgzcetSfj79MgtJci82o0UNJX  
fVkmYkC3pXwkGaujYeNkMhc3FQP6ueS2RN4QDyTzv++2szMgtXqH+v2H0SCV  
cp+jT5kbpQdaBf1pj4ZNet8v2v4MqE/cRHK5JxqmxDtPcTxiQAwLeksZr6JB  
oNHrtL0413Kowdd/eB8NpOlkfhsVGFgln3rQ8Kdo8AYJu/+MmdC8iKjk77do  
eGeaFMA3xITk5qSWOpeiYW3E9N6vcGYUf0ukvnk9GpyM4v2Xj95zmDd/UP1u  
NDRzvx3NF2RFFEKcklXEMVCgyajZHM1Ly2/MSyXUMfDptt9wZyobKquirS9g  
joE/yOqz4QY7mvEgDzrDFQO+WpNPNso4kcSxfIpgjHAS0dbwJrKjSK/7CxG  
SR7luzxa2HaZF5kVnVX8phADAoQfGvRd/EjCkCXZSiPmaB5kvcdfONqHe5XP  
nxFiwH/sDmY+KYhm7knTyhvFAMnighajvjb66tVmW2kRA+9e2vHVDomgMjaD  
CnqHGGAx2DmeGyeGrNLcZVd9Y4ChnKVQTIYKySiuxLmGxoCT4M2ofCSDqH4k  
YIMxMaD2+MqqbZwcmisjo9RKiYFtzsOVocAF1G12ybI+60iPeuRZ6UZFEHE  
X8aZFwPZwuJNxaTKKLG1YSbnUgxDtZZm0aqIAXel1H+VTFQcCD8R0080qj7  
Z9UxXhsD8z6SVp3HNdHi6c8kBVdjoE6TmUWYXBU9VA82bX0cA5shXots88dR  
1crWZWEsBn4v3MA0ZxBKvXF6uqg3BsabKV0IEwE52TKjkryJgdvep8zUU+kg  
FcrrYVFjR3ofsoZ939NBTJ2Sj2emYoC14UTWF6SLVsMfH1p+j4FK5ybrdpwu  
GhDSM3q2HA01r4eqzgfqoNsTby/KbcSAj/C0TJoyoMw8t4/Xd2PA5KtDaUER

HrmhJQF64lhYMGNrFVymhTQ24oJSqWKBg+9uEleVOsLVkDSvMMaCw+e3D53f  
qqDfzhf3XDhiQZBHW4zHXAkN0fPqDfLHwgO16qcaMgqorqcuX1MsFn50162o  
FcmgM3GqY3WysUDxLLlFxESeUo+5+VUjYWY50bH5zvE0PHPFn45x2PhYsn1  
9b4JecR5aerell4sfFqijth0C6NN/cAtP9NY+JgkY9dhLoze7WycZtYwBHJ  
f8nkEEaNjady9F1iweOR5YkpImGU68nwrsXrij+tHe27n0LIF3eNUzgoFnqK  
SK76PRdCMCDuVRQZCxIVcwJEPkKIN7W1njgxFIQoEmkKvwqiHXmdjciMWNiU  
TV7ZNBdEY9/faM1kx0IQ68oLuSYB9KDU5bTlhVgofjx4GU8kgM6bLrzGrsTC  
qpzSY91cfhT4LwYndz0WKL5MT8Tu8iL9FqKT12/HQrTZosOvMzxIIKDgDl1j  
LNA8SRZ5r8qN9rm511JaYsGHtjATceFPg7XqK10xEKyokrdICUnas1SznB5  
HgtWOq7usxIcqFCtu//Vq1hQJtHIDwphR6HLZkya72PBOntE4+AlGzKu/ORU  
9zEWLjto4llU2ZCijf9Njply2IkOLavrPLq3KP4sZS/EQtZUiEm3Ew5Nt2co  
ba0d9b/su78zHQ61hdGl+G0d9cs18avMBCsqFix/MXYQC44fmVlVWllRxLgo  
nT55HBizX5/5dIsVOSnmfS+gi4OXnRWfw6tZERSsdXxgjYPHkW6pVPdYkcSS  
TZEgTxz0jll+Vu9hRUwGT4jChOigL0dX4MI0K9qp4tF5JBkHbRL7fhX7rGhm  
P4Pzn0Ic/HSSGP7Dj0MDTn0/jDXiYKQ1NFn06D580GrcX0SIA5qvj88998Sh  
MqZ7ldOGcaAV/5LXLQWHMkOZ48Us4oCK+6vt6Qs4FDgQZx5pHwdcwVaWr0px  
yFpkUqTDLQ6YKbzlnXjkFYm2if1jYOigp04rSwcEpquHjUPiQOjqvP8/zxw  
iEaD8m5p9FH9zxrhlZI4tHE5JOtbUhxM/bgrPHTEf/LXW2fpU3FA7iTv0ZzA  
ip6bqijG5cbB1iidzv1tFtRQW0b17GlcGEoYPwVXFnsZ90ArVWkc7Bx/ZVZw  
hxmleng9samMA7kYeu+qcSbk29l7oeJOHNSRHU/3HmVEZhxS/vONcaCgR2Wx  
9oweqcRcwCu0xkEuU1G7TRgt4n27gUvujAOrqRXDww9UiEzacfXF8zhgYpFI  
9dgnR6vZnS/oB+MgUNj569wECRqfPXbN8X0cvNsT+rnbF4jH0Jnomx/jQIC/  
/6IMbONrri6eWPl61D/+HL80/jV8vM3DnfS10Mi8rXnPxu51l3sT27uB/47q

nzz33uH0SpchTXlty0Ec3A7YGkz8stM15/8l3Y0sHqh6aNtofEkwjue6DjW0  
8eB4iVhs5DkVRsRfK/ubJR7cVU0kRS4yYotJtORa3PHwonKJ74Q/K9amONby  
RileTLzktM/Y8WBVBRR5HArxoBAb8OZ75TEsd6nC20s9Hjr6JuhLqYUwp5t+  
zP8ZxMP5UPOPau/FsF2m7XBen3gIKYtXGy5QwGZDXQ39g+OhRH7e4/wfRWxw  
4Bnfg6ij+vXZBaU+ytjVzNwhvcx46BP9ZJ3prYZp/eaSCrkeDyu+xylop45j  
QmbpxI9ux40V6t2PVUUIo6mb/Xh4Nx6a7ERUZKUAm/K4m1PUEQ8Fcv30LH91  
sJedjB7TPfGQRdG5hVvRxRo5YtXEXsWDJ4v/qYtf9LDimI/0ke/i4ekS3VWr  
bn0s9e3xH+0f4oHbyzRs65wB5qVF4lT9NR5eUq12bZwwxAzv9A/mLRzxy1xo  
zV0zxGSYCvAxv+IhdP12QCvRCGN0sXnguh0P61niYfkLRtjWDw5h/X/xCOUk  
FffBcWNS2urzFRnKBGisT9VnSTLGejqrqdgYEyD4oo23eYUxViMWmHLAngAC  
6k5LCrXGWP4l2bUf/AnA/MrVknDVGlv3/AcFkuA02HSNH/jjDH7gLB Rx3IJ  
0Gl25eK8ljGmNZJmeEMtAQ4vBNifWTLcjuH12nNQAHS5Rb53yDLCyOqoZCIN  
E+Dp57SkGXljbJlluNLJ4oiPlvuLW7GG2Nu0y8w6Dgkwd02riPBbA6x10emM  
pHsC2Ei+Y/3GZoBdteXfZvZPAH/aQ3LPE/pYBvY9aC8sAc4Eq0cJBethvpL1  
07NxCTAebvK6IVEXO1Ecbvk6LQGqgDwvJU4Hk/un/LzlbAJIUakJc3gBtjOG  
1Z65kgA8yr6JUfTHsc+EM9xh1xNgLkDZMue0Jva84USB/Z0EsBv00Gc4pYbV  
sTESoXsJsEqS6EglqIIVZI5Fiz1KgGZvxwP7UkUseqX8B0NXAnw5PrikWiCH  
OTl4OG2/TACWyIxFcJLC8D0ir78OHfH3pfXxyBPDhGSW8QNjCXCV726vML8w  
Rll6/8GD6QQgqrqWksAggK0SxwmXzyXAxFlxbf13NhlqFbjqdUE6BXqU+Ca  
ZMOefPhHFbyZAPUsgXd1qpmxCt3eFjv9BNGLF/eaXqPFsu7lrWmRJQKLcrZi  
znVyLIDTykuYLhEiz8wkvteiwsxOs43R4hKBbsHu3brXdPfi2qThJk8iOBl6  
9pjV/+pid65qnxZOHNvP4qjL9L937b/wk+mVToSPf20TPqaNdH2Tk75xTzKR  
Zs6v/iLmuN3VV/6buUT7yB7RKj8h9RLfSPb4TLpeIgx9iCJ6ujOKvxSRsu1v

mghWPRKbL8em8PGTEGxpmwvjvVO+rVkh/w7saUHxWd02EE2KaEXPsc3h48NpS  
wCcRNle/eeNIF/BiPJeeU4UkgqzBJzNyo2U8bbaD6np0IIAvWQQVaq7hf//m  
qfuUnAjLJzST+8vW8ROu37ifZyVCI5EW28/nm/jOvpqChrxEil3ruXWnbwdf  
pRhKdLkoEVQU5sb3Lx7gz1YoxqRcTQRf5s4/Kp5H7xfK7R8+1Ymwfzl8hU2E  
DKl8PvVapTkRLtT8OWBkoUGvckLJt4nwrcCcsN2d1aku/jrkvqnRCh+xTXQ  
9wmHnhoZF5TNJEKivNTegQU7aqLYPe3yKxFkhPx/afByIXF/64zOrUT4Qioa  
4xvOjap665N5DxNhsY1Cgvo+D+ISJYIPi0+C2yt2a1pTvKjojEvUF7ok8Dd0  
rqH/zYdo55pDCbgkyI45qXBImR+d0aMNR0JJAle+u6E/+o+hg2ofH2LhJODb  
7uU7pyuA4kmeuntLJQEM3MZKLwqgX144lxeKSYA+sJ+reyWAAntC7UU0k8Bg  
F8IMfgmgbwK9VmchCTJJjV13DgWQSyaf2bxREvC8ttlz3RZAo1/jjIwsj/KJ  
ZrINTAggM8Kwbp3DkX1hr2fnmgDqrRRD105J8PHHD40AAwGEDtM1g/208v98  
PaZ16xh6cvKDyuvQJDD9TCgwSedHCl3yCjKxSWAru0rirMWH6nlzpQtSksAQ  
BVzBOHiRU0qM2FpWEIRfLn0Uzs6Drk1pCFnmJUE5G4t1hgo3wmlf4ntwKQlc  
GkPsKSK5UMHVJU7m8iRgB80HXP2ciGJPBxddlQSHbYyWb9U5UYbzVcbR2iM+  
/04fw3dzoJ22DRqV+0nA/VeKMcmdA0VxmlJceZwETcXltOVMHGg54RbxVlcS  
KLX6krSMsSofD3/3HXqT4I004LfpOnY0rWa382QoCYZFfa/I5LMj+5LGP5xj  
SWBs/JyuLYkdDf9H9itpKgniL71TuRLNjозsTy5PzibBuSXhv59i2FF366Mf  
2stJ8FDD2rwihR1p4hi+VawngUDAT86NHHbUHOM/fbCTBJQnC0zXS9iR9Cj2  
wZ0oGa6Q9I3cr2FHt5U4Rp9RJsMBQaZC7xE74iuKGBZgTibIA7srz7vZUcl6  
/6tT7MnAjzx+V7efHTFaC/TO8iWDWrnOm0997Cj3QWK3nmgy/DSSX7jexY6I  
md533pZJhigO5YXb9ewoOULyCblKMmz++tZBdo4d/Rk+1eyvnQw17e8sR52P  
7k+5yXv9usnQ4VZ8WYybHf0oUKqXMEkG956eGNwAG3L/mXf7nHUyUESIWrZ4  
saEPZt9vLDslw/KSYfTCDxyyatS+ZuqZDKNVG5tX7XHoFW1xSWNAMrykl02l

aD76v0JWL9FHJEP9p8N3PvssqHNQvyA8PhlS3kdSrKiyIBWp67lv05JBsCHf  
dtyDGYktmWdcOp8M50e7PoWxmQlboxjXJG5eTwbvAWgo46Rfn3WGC7bVksJxJ  
5a6ipEU0AfdD2RqSQVJq5sS7+xQoczyQlK05GfqXIjX9jpOhLT2hq7iOZBDu  
lrf06iRGswjX+lkhk4F0TeRbkfYuvmMyWYhlORlio1kvj5uP4BVOqLQzbySD  
QuK1S6vHbnTVPPIpybyXDJkF8uEmE+NdRcWeaUw0KWC5LbBqjVvroiLlxjGx  
pECuyn+/1Mv/dKVHjTYwcqdAlb7Hm5Sd7a5gC8OPDFIp4GlKWe1GSYTNPP0X  
zqCUAglP9pVuTBNjDtLt5AxaKWDm54LIFjBiQ+XRFfS6KeDXcUjsl50c06WS  
UaY3ObLzbppNxFFgbfE/XtHZpMDZ31k4klpKT05HpSedSwpcrzjm4VFLhd22  
ddqm9U4Bnuw/DO9jqDHu58wXaINT4DSLBIUWNQ1WqPBahDY6Bbxq58XSfGkw  
ihtnOmmSU0Czwck2LYsGS6VHNjRZKVCaWRvG50mDbaRsL1LnpcDhxX1H2KPG  
ApcfZFAXpcAe/tTmgDk19sUpmJ36agow/XYXveplhdn1C9+jqk6BQdpnQyU4  
SmxQ9bMeVUMK3N8aHLp5ihyD2yWTIM0pYMDDeSfI5jRR7zGIVRdmRAuzv8j3C  
PYgxmVPUVJTPU8CGVTxs5fjBV/Wv55UUgylAa/3ps+yD7S5091RVipEUCBQ5  
NR5Ev951YUh1iHwyBdYfzCoMmnzvtP+5U0+e9T/xxjuo87TruT6ul2y5RTw  
5XIUm30/hv/N4V1ItpEC+zgfEyOTebx/No842V4KXHUv1G/i+o2f3hzrliVJ  
hWVC5+Qs3ybexueCHSINKoxjd07m47fxA++NVkhYUmH6WPmTmDO7eATEWSTc  
qZDM5T7ne7iHb23q4CQR0rKzsY5JPvmLl+KLvU8slQp1LD275zv+4qvyZQ2J  
IVKBlz5qwAn3F8++Nz9NpJUK1SQyLY7vdvHnA6tiiHRToeP3nozdzjae5IMz  
DZFJKkyOzddxVv6HTzRgvfnPOhXUGnfKI/o38GstQ+r/nFOhbTF63pDsF95X  
KHv40CsVztv7Wh60LOAnCwl+h0GpUKF0v14u5Cve6t/O34OoVPB8mhxTmzWE  
7wtrLjpIOsjzhul+yve7mk1Eu/fPpYKG47f0ZM0fXflktDx/61MhSSvC5sf4  
YRcDTwWMP0wFKxHWxdjPxFihqz//fZUaO3+16qsQ4axHJ2g53pSgchbTuBa  
IQVW7G7500dVKoRuv9Xk6KPC2ONmJvDvUwFFsrHgpmmwsvyofY5PqdDVKd9+



MESHcVeTCG3MpILQK0sCXGbAKtouGw0tHunXs528hWPC+N+KhNX8TgWXmGZc  
90smrOrHo6LMnaP6y58npByZMaF9wzYXojTIFlyT4H7FjN1h+fhZhSoNUi7+  
ZXnJwYJJSaARMjKlgWAj/3V3YMEaCHsSSxxpwP0r4u2xlyzjkG/x4lgaML2j  
bMbjWLCmUN7Y6+JpcLv0GytnRlTOH2vPEE+DeJNwuoC5Jix5nL0zFo9DSRH  
Q4a+hjNhKg/ezkkT0qD9gWgW1zoD9qTPk4bCKA0Yb/3He+ISHab1eV1+xiIN  
BkMTkzraqLGnf7Ls0xzS4ObBl9pPXhQYosGIFLunQaa+SxtLDgnWLXCnKtw/  
DWy910JvGex36aqr9RmHp4Hvi7zD9FsbXS/N+1eE4tOgkDr0fRvZ9y5DXyfm  
g7Q06GY4N/Pkz4OuV8lLah/OpkHdh6LTl9Ym8WaXkt0eFqTBx4n1GsqBFfxw  
LW1W/pU0KJbmSboVsYm3wipq/a6ngVix0rqe7x5+ZEz2DeFOGizriE3d6f+H  
t1vBNrjupcFondzKS0sSNEFsxbnZmgZskcd0PiaSISfOb/jhp2kgRM5F+OIF  
gabkon3qXqZB/tawyh9FXI3ID2XNZQGiSObUdczqNGMa3GT21gaylojw912  
GuQdLTqmNp0G2qfdiT8+o0VzuY93mebSgCGO+g9XMR3yv2F0bGUIDajzN4Jv  
aNKjxUcf9Xv/HOm3fdNm3EKPgoeCgm/8TTvat+YyW6QM6Ofs3sUk0nT4pCrG  
livHgCj38x/Z0qaDWyjtij+qDGidkW9KljUdiC4+ODvjy4BixZqIqHjSQUtm  
VaPrPD3aOk4QmxVKB40RqlzdK/Qo0fad6VOpdKhkFA6IkKFHe0FeUSVK6dAe  
/br8eRMdSs3cKInUSoe1c48iel/RoX8lp5+a6KbDhe/FGiczaVHWPdysiEk6  
MDLw6fuN0yCyl3co/1mnw3op8SxOkAZRrffbtHilgwRpE+qLRXKo3ROLAhK  
ByPiz4Zji5SIjn/5ekDUES5TM/0hTYkuqKS80ElKh3M04ZH/YigQsyndEs+p  
dPAcVKcgfUmOir2uM2zlp0NxlqHb035yxJ4op/Ku8IgvncVzoxwyVHbhmXND  
WTqQ7RDnniAiQ9x3rDLOVKXD+RG2g0fnSZHCg1jZD7XpsLWQfm5ThRQZdpZN  
Sd5PB0UGKfrVDRLk1vf0XOrjdlj8Xi1PkCCot/PqL/tSodNg4B/Lu0kKHea  
bF6wNx2WW879Tu0jQZULEsWxQ0f5Vxi+NB7Ft26Y6faPpgMLD4EagBQNHkT+  
5ppKh4eR3i35D0nRDNWVytDZdKjm7uH7YXy0z1nbzZ4tpQOP0a1zN6nIEd2x

z3vM6+lgK2Ktwf6HHAlJEdf77qQDf/LNruPUlEhDVdTxyb90mKig6qOQoEIW  
cIKchjIDPn4V+CZNoEbJDpe87rNIAMt9gkyKAy0q9HrESMKXAYn3W0xuONCh  
mtBPXXYiGXC2rcWJxZlejWQJcu8pZcDvISWBTxKMaLHAYMBMKwNQDaMvKzkT  
OiwLir+hkwG57pqVU1FMSOr+wxF9qwx411isPEhgRtAxnlmqmAEL+/tnf1Yx  
I4feXbl9wy4r0khK3PIjLKmdPIvhmXAmZ+BAf81sqCyeT/N2dgMqOffXU89  
ZEFN6+cWVFIzoOIB6TMuM1YORTmiN5mXAcUhYSwFU6xog2VrXaYoA/Itpi54  
8uEQFT93VUb5ER+K3uN6rjjEL4ksRqoyoPp3b6nyFRxSUFHeF6nLgLmgJB6F  
1zhkQshuSLifAU5vk/XUD3DI06TBafBxBtCl++UbSbOhePthCj7sCI+OhXvY  
s6HznhutEb0Z4CptG5SWwoaqQ9h9ng9lA09c09aN62yoLV6LmW0sA/RdrIp6  
09nQ8Cn3ZwFTGTC//P3J6jgbmjufdYxmWGMf8i+s66yob3SGh765QwYfGtx  
Uf0QDTHdGnzlsZ4BQl/cNNzo2JFY01pC804GiKQMOiezs6NKN+rLJESZME2q  
HFHEy44kvXmW75Jmgv244mY1PztqDZDVsafMhKtm3r4NR3ZCGKHskCYTOvo8  
tGuP4gejrX/VMmRCV1XvZulRfvtEH0Nrlkx4qC5Pl3JUfyYt7voeWyZUL6of  
WBzxCzmds3mLKxOuMaXosUywoa3cclNzvkyopSt2eXGk79SFu9VbApkwpsmP  
eR7ppyvu2r0hkgky/7UuLSazodLyt1YnJDKh89ofJxc7NiR041vthnQmXMiL  
y2mRZEP3bv85vCafCQ/4J35v7OGQRgO5g4HyUfyjB0wcAzhk8UiSrEwrE/xO  
6nhTOuCQk+5qXSHKhBnjtQVDZhzyettkfk43838dW3k8lO/XLozs5hmmPSIL  
SLJFSXeHEFKEREr2rxRFshNjZswMw4w9SZKSlGixhVRCWRIRKonQIkUISbz3  
7/3z+jzPc9/nXGe7zvGAXTt+w9smGeR7OGAq1iwG/L7nVirFyKCgTzqZ4ZYx  
sLmqvVZyhwyKdp7efnfpDBYU3ZEfiPMrXrBq8Lgtts9HWFergYKy1yC1I4di  
QDFrVZbGYQoquL7o+QGXGHgAeclbNCjopv7j0/vcY6AqavLQuCAFITcwlu/2  
joHn9zZ6OL8lUP1+89qdvjHwxPr4V5tqAj0bEHPf6h8DJ263NhVIE6jreJuw  
VmAMZJicqDeOjTcbmeRi1eAYEPTzvJlJsaBRhq3N+vAYCEt5ZXJtH4G+U6i/

VkbHQPOqNyc0thPoz8VX52RoMVBzkvflPzUCCWzKRhLMGFj1i5ystZpAEtWH  
h4U4MVBMCVfyIRNo6e61rH/cGDDY/DHyozCB1r58rz7Nj4G0shCP5AUyUnEr  
eDGRHgNnF5kWbpslI+0J7+CxczHQQDuxtGGajAwjVFcNXogBjYtiZ8V/kZGp  
yPiD3ksxEF+z/db4TzLal17i+eJKDGGZrT5jgt93XB8g+qwIxy+9OffbDBm5  
39IpeXQzBsTljsw+myOj44bTtvfLYmDeePrAncUECnpa+fvOvRjo8C09y1hC  
oGiHijwbVTFgNVdoKidFINbwDqMrtdh+lz9nDIEjxD+1aPTCwxhw/10/sHQN  
gQo4jM3JT3E++SqmxG0iUMky85fxbTGgRPkT+nULgSoKxMjIXsTAmsR7HZYI  
x6Mu+VFAXww4pxwUt8P8vtxj+5/v2xjYMn6GU3GAQG97ZSU83uP43Pl6m3YY  
x8PrVanzSAxYWr+25bvjeEydO2D/KQZWKztrvf+PQLNnD89afY2Brly21vhx  
AglKrr1oOhkDW+XjKb8cTyy3+9Cv2JgGeGZWXIKx2NDwUe9PzGwrdc8bx5j  
+bve3M3/YuC/N3t/1Z0kkKqRqrbK4lg4Tk/2bD1BI032Lz3ypFgg66vVCPoQ  
yNC5JGKFacyIOwU82+5GILOPp+QpkrGgT1GIGDIIIoszOk/EiFgo0Dto92EP  
gRwFpo8JUmMhZ49sv+00ArknV0rNLY8FrX7XjD3qBDqxOuLOz9WxsO/wLulP  
ywl0pmiH41f5WLjm/qjFVBDHQ2/RvxHFWKj0/2Ab+YWMWI8fXRpQiYUnpNKN  
hS/IKMWGYfZKPRbW3tz4dvAeGeW83f3luSa29/ORiV1ZZHTrd6vuw62x8H3b  
IqvvB8liYKF3TbBhLFgn7uto1CcjB+ER4Y0QC+WHbAxclpLRnOy/3rTdsUDX  
uydtlSeNLLU3Rfk4xELrxL8lX05JodET3CfSQbEgs0Be0vZWHBkEnStpClmF  
P2bPfd6zxRE34kpmWEQsSAnObl6nJ4500bXHhmmxoKuXEPEqWQzFFn6VrODH  
QtW6o//k9oqilyV/po+nx8JA/s914QsiSKWcNCh/LhY+HxAMcb8jgtob1tzm  
5MXCijLPXfHyImh9q+r5nQWxkMJSEFzZvwSd6dpC/1kYC7KTOvTR9Cvo9dBe  
B5dbsTDctc65T3YJOvXJaafMnVgoiTr+50CvMHR83UuluTwWwpe9+1SZK4yW  
zgQQudWx8LPyts0mH2HkuxA1q1UXC21hq20HdIVRnTBnePRhLLwMsKX8FsJ6  
Ryqj9fyTWOis5NzL7yUhT2r+PZunsRDq/feoRckJva4uySW1xUJESv+Wowly

LyhWx1d3xMJVexfnRl8SOrqx8dTJl7FQ11Dz88Q+Erqt3emk2Iu/n92oHK1H  
QsIGA8Z9r2MhSXJIRkmBhJyMPm9MehcLz6jUoURZErphPi27axj7p/b37qAY  
CS2yEZj/PRoLmZ7PSvcIk5DdQamxG59x/vRX/pnB+KrLyg63CWxvwdwdGUKS  
mvVSrlo6FQuv+lsEm5aT0F4/7fyWX7FwKu2wJFIjobwglBDzJxZcPn34edml  
hH5GWAZt+RcLc5IGX5cdJaHdcQ5HPi+iwSPI5IXOSBLK5ribXRSigeqKNc86  
M0hogu+/2V6EBjJ67G+6N0nI+Fz4clEJGji0h1KW1ZnQeh5zcZ00DVq0+d0Z  
z0noY2HK50AZ/PxuyOsXr0nI8FZu14ZINhh5+UXjyAcS4pVfr3mzkgybytiYG  
3z+T0Hbt+RW+HA2Wks/0Sk2QkN6TR0lm62mQriFqchRjTmt7yF8lGoTNX1m7  
8IWEDjsnlCyo0iApeokxY5SEND7vHhHUoMgbU1/9Ng5g/sKEVoto0+CnQuzB  
ZV0k1Lnkoa2EHg28R7/c9n9CQgUZUWyyAfZX+KDuwXskFKxkUC+LaJDZ9SV5  
Op+EzO90Ty83pkHw+a6wwCQSWrnzqY1ZjT4dkP/6vcQEhp/cdJznSUN+A5G  
TzMwf3Wu6ueV9tFgfHRFJseUhNyjr4hoONBAevqN4JQECRVVZQ4jbxq0em3u  
eccVQuHm9it3+dJg0VtdIZkTQsjqFXn/bn8aeN6yi35oIYS+/2TXWQfTYHke  
bcMGISG0VTPynCuTBqPmagJbwgSR2IOtHZ4cbK/WWVP3g4IltznhY0k0WPik  
H7xVTxDFHPcPCsiggyFQ+KngaQFk06tWfCabBhsFHfjVewWQInvsfVguDWQl  
tqesvi+Amq+6WtOuYnuDn0Q6MgRQ9pY1TOZ1GkBQ7bvxEwLoRENfDaeEBkXl  
Hi800gggZjfxI+k2DfoS3pMeGakg8pCtWmo5DdyMXbXMNwugoVPSbpnVNHih  
liqyYi3W5wstmefraFDJJaGDhABiJrHaLz6iQeGD6HgVYQF0cI0pqaCRBpsl  
c7Nu/1uMVG4sNrz2DMezIVFp1cxiNGtQF3ijnQY7twQNxf9ajFqfhheVdtLg  
042o0LnpXsJXUX/wbg8Njod31gjNLkanxn4sreqngd34eWPXxQLIOLh0b+0A  
DbT3Cz51kBBAsiQ/+sMhGmT91hKSWiWARINV7z8ZxXxo7L9WvEkAVa4fnXz6  
mQb6uzjHDpgIIE5Zvkr7BI43Q3h08yjeV+Do0c4pGkw3F4rpRwsgjeerMnqm  
aWBcu27+eq4AChaTChgTjoPSynXdQkqCiBQ7pSy6IQ6UjKT17sb7x8Dwyiuz

anHwnm6ovNFfCJWb7VIY14iDnNY5f3aaEPKWSFv7XC80BjN/squHhFBj5pbl  
6WZxELZ2nCzCICFmSajoOu84KFtsV7NiSBi5EJfiKb5x8PBjReZy8hKkF/SU  
JOQfB3kuX5/noSVodNtKgbEzcRDeueObzYUlyOzJ/dkbjDiIeXNR1sJNBAm/  
mf+y9UocJLPq7dyFxA2uCrVhQhtqse9blvF0Pll6w/rroZB0XFHnJ/A8WQ  
9395H+bvxkFD3mzE9LAYapwyetvQEAesgw7Wm3iiCnKaLf5EAfUCl3/uFpJ  
5HLippXxxzgQeEfysZiXRHRpu5/pjMeBVojK6isIz5805aalP+PgkuSqhOBa  
KWQm3/zgjSAdnnzdeSr+tjRaoi9e5qNAh/Ci8SPmVVhfyUadXrqBDk1rTy42  
wfPScnJiS4MaHdw4Z47VfySjpOLO6rXadLiwZr/wpqUEKmWZRLVtocOb8qZZ  
Kp7PnV7lOyO20eGcEkknwAjrB/nshh6gQ6PnsomTvgTa+k88nm5ChxdXuJoS  
WE8e6o+y0DanQ+oFST0JPoFy09zaudZ0CEjxE1W9h/VpQBdvux0d1BZ9y0CN  
BBraZ2r3yQF/T6r1LuohkLKoaq+JcX0Uq20tTv0ikPlodvaUGx20961Y/wTr  
Xd/HEkfyvOjQH2BU5UpQUGJe9Np9x+hQu/1pwE45vK9FfX//9wQdPL7FFh9R  
o6COQ+4FRafosNLUsLFiCwVN6b/0PhhEB81fzessgYJkqWaqpFA6/KyYWUNY  
UpDeVMWX2xF0uG2as1LUjoIcn6uWuJ6lQ7UDPUTDmYLCb5w/JRVHB6fLsWIR  
7hSUw5bUqWHSYWDY88WUDwXVeZ/9dYxDh4yOeS7Hn4IGd01WLEuiQ8c6eTWj  
0xQksM4j/Akf2598jiQTQkGK8y8NT6fTYXHX9pi5MAoyfW22IH+ODmmXX/35  
E0FB3pWVD9tz6PC+akfnkigKYqWr0SPz6KDXjo6tx/h6YI6ZWgEdhrKK5cwi  
KajVWkq0t5AOWp32tifDKWhCPaaFUUyH09rintn4PrLYFFfnFh1+Bvy88xjb  
oz3mYfP+Nh1IFkN5Y9he+4ZuSnI5HSZPFiQIHKOG4Eu7uw2r6SBysbyLjP3N  
iq7K/FxLh6ykT71Shyio2nnjoayHdjiYlvw7Y0NBb7ZeWG32BPPD+3muxYyC  
5qnS734000FZxp8at52C5H/EXLrUSocC/T1tqzZTkHHHlId1Bx3WIR9el7KO  
gjxveir/66LDF7PTAUMUCmJyej5ef0UHM/yja0Rx/K/9Z17s+Bqfv/MYITiF  
9bRjtZ/wOzpkrrVWWPueQOPr1DXvDtFhwbkkM/QFgaQWLky5jdLhWGNEidhj

Amm+kb4n/ZkOdzRvFHbgfLStig2p/UqH8h06j58U4X0g48e245N0sLYSNRrJ  
JVDGaa+55b/o4HhprZtaOoEqbV7Vnc7Q4ca0Ex68RAL1b7KIDZrD/v0Yjqcw  
CDQndn/X+kUMuJwaIXUD14PcR3XhDkEGzH3fo08YRiB4ktsctYQBUm/fGIHO  
YD2cT07YKM6A06op/t0BBIo7S9vbJ8WAxmvb/uVgPa74oeBID4UBh3QsnQ9g  
Pd9g3uTXtZQBkVdG1XQx9rz5KapjQMclm510cHvC1EkktrkGEBc+G/MCp9X  
EKyR+2w9A3pscivDgwicXzYITcoMeGFOaigPxfvFztN1DWoMUMt58nc2ikDM  
gvT2hxoMEHUXsTWi/68eKwftqBmQVTZdGZdAoCa//on7egwQyq9aX5NKIJ/O  
uflKAwYEWYbHfsgHklj+WulyxADpR25N01cJdO280do7xgxYLH9udLyMQBaL  
PDeXmjEgOMLiRX0tgThPr1lf38cAenzVi0+vCKSm0XK00JYBp7xbWrRHCdSS  
8vVkgQMD4i/0OhnhfiBxWJuX68KAp5EH/mZQKShp4n5Hij8DdpyIaA93oSAN  
u4HB5EAGjBZMj5gFUtdzikWTicEMWDL5av01Js7/WFMiPpoBxvIB3UQZBfI  
nu+PSGKApkdkdq+4DNIONXQLTWHa/IOrTgUKMqjzjUzgmQwGxH06+/zldhLE  
ueqYcjIX27cwVLjHTwalbR3q9ChhwH8PPsePdckg3QtCw663GXBdTCxs84QM  
6l684ceRcgYIvpG/XSwii5a2HjdxrMPf+/U1qCBZlHXkl51V0w0+dP38mHBd  
Fm19tMzTohPbP5XQkvZEFvUpGwSZ9TDg7kmThJB3smj19+g0GGDA8z8yxTRp  
Kqq2v1SwY4gBzDqLfxUqMi56vFdg1EG2P5r6i41oKlcmki37gQDPh58vUzB  
jYoMx9RGtKYYsHpjMjUvkIre7tn7S2OaAQZjzVGzNCqKLj1JUp9lwPexZYF6  
KVQkR02hqs4zYlolluuYR0V1YXeVlAWYMKOkw/C4SUUuAz1bFISZULFSbuxw  
FRXNG/8xlRdjwsgjZ2fzBiq6WLjKYY0UE7aFRwiqtVMRhxI/vYdgQlPH3tSQ  
HioK8voxn0xlwsC3p14f3uLzTI7aWaxgQkztrVenP1CRuUJLocAaJpSsfWCq  
+pmKtAX05+7LM+G/uQoJkW9UtOZ9vs0ZRSbc2HaILfODikTqpa5oqDAhstZr  
ufU0FU3lhv8Z28iEhr/spXUzVPQmanTvp1MqNGsHPSYpaLGw7b5h3SYsGk8  
umvXXyoq3V43LaPPBFVmyR43jM+vVNvTZsCEsg/CVx/g95l/0i8yERMef929

0/0PFZ3qXfzpzET3OK1gqx+U9GhCj/zP6ZM4GTGXr9SUUmGX05ty2YsFNo  
XoE0SUUaZ0wnj+/F/t1xdewfp6IV9mWmSvuZYJFw/LzQRyoS0lmTPWDPHnyA  
AYv4ISqaInGTmY74fauweq83VNT7/afx/sNMmFg853y5m4oePXfNFHnlwmi  
ctguzG8mdytE/ceEkB2BxZW1VEQ7UZCmd5wJ0k4y4Wl3qejEHvKnB/5M0G1z  
3jF4nYpA9CPfPZgj6w80yXanU5HaR7vRVeFM+Lw1b4jOoSjq0wOD7igmGliT  
lt+OpqLP9Mzh3QwmnF3xWD3Fi4peeghuXcxmQtC6nCd7HKnogfHjxOpEJkyW  
rdrGs6SitEW7t2xKYwJPSEqhaRMV7YicZlluM8E5q2bDnm+ySMXZ/XXLVSyU  
SjRVVw3IlopB+2bGdSbQtoVltbfjotHfV3p/lzHhjX2z7y9cH7zTB9Te1jNB  
qlpt9QU3WRRu+zA6o4EJ1Std+zL3ySJPrU1d1s34fg+DHXbbZdG2b0KRj54z  
YW732+MrZGXRkO/dtsIBjuRF97GNHsugLe4yAYFzTBAbTfs+uVIGKVO/SKxY  
FA/d6hZm0yQZtLT50bUHgvEQvyziyOR3CpreFDgoIR4PtZzgyN5GCqr802Fd  
uClErjXlaz3G/caQn6TxRi8eUpUyple3EcikXnTcNCAeup4bXVBwICPd0+/j  
x4PioUbtbZTZDjJSUq5SSA2NhyVIGdfcFMIIIONHHefBsPLxaeN6kOSKNmg82  
PQtPigef9u17HddKo0qxi97rUuKBdZ+94sSEFCqqDRZoTo+HKwvrs9qxHuQo  
KBtQL8SDkuTO+yVHpNCeb/SiW8XxMFC7X0DpsiQyzD9s6nArHkgfNJ79PiOJ  
1A/ovp+7HQ+Rbt7uIRaSSOL+8HLL6niwGvpCuTElgdqZxqwPzfGgEcl4q2st  
geq2rVRMaI0Hw7fH+BUqEujW+OQDrY54uJ9eoWMqKIF4tpd+R7+KB3tuhm3p  
fXEUQwpLVXodDxGjxQ5XzomjgEqbza0D8aDloeX4MIQc2cot+m/FKPZnWaa7  
9HZx9NCRZSP9OR7IXrvCO1aJI81UsgFpIh4+rVp/ffu8GLrYlqXwdzleNv+h  
/T46JIakRNZJTv6Kh/mqe/9ZNYuhKOOi6dE/8RC4SmwRuVQMjUdqDb75h/np  
f/6k6pwYcq6oetq5mAV37zrUOTLE0LNJozvNJBZUeU9M/E+vb1N/llMnyoLO  
m6OHb7uLoWvetsy7kixYvjtZMsFeDC271H/yOsGCwm/6wunmYoj52t0pj8qC  
HE9Nq3dIDP2ifjHOWMECwqP5Q6i+GPK00a2euIYF669Zd5/SFkOdnL9U2joW

jH+nKvRsFkNGT+IWQpRYwJr17arAuHRB/JOOfKgsotNwvivh9OYO0To9NLLhq  
sihAHZ/HDVpd46TFateFdz5v8X1zJQVXrLewwPkkt9fMQgwd/6SebLqNBXf2  
Oz4JcRBD/Qr3QrfvYAHdg6d71lsMWbjscNcyYsFHN8bGE2FiqDLryZ4Npiz4  
Jxp/a2+yGNrQtXfLGgsWvFk+8kT7mhjKkOyRk9nLgvw9306rNYghkrmLiOh+  
Fvge/VW3C+8zQbTRyXl7FlgTu29wSeJouMb/9U9HFvjL6Rot24jj+3u64fNh  
Fgztkoj79v//T7skq8eTBVtaa9Y33xJHF68mx7b6sMCqSDdhdEgcSb1fdvzR  
CRYop/bcS14hgcYPqKCSIBbwYl951/ElkDOvdENBKAscF/X8duuSQM+ebSWy  
I1mwP2aHa+tySXRtp8UHBp0FJqHMQvq1bkmhZ+Iu2CBYLzvgueW25SAox7zpV  
BCSywNRWs8f7gBTyVPXlHEnD/CVw5DrFpFGXx9RpuywWTA+vesD3kEbGueFH  
LHJY8B91+n1jhTSSl0nQ3FLAAp+fK1ghqmSUvFdm5cZrLbiJ1vcW2UtG8/Hn  
BdfdYEHHR5tymj8Z+T1S+Lq0lAWfpHIUp7hk9GauuEfiLgum2vYdcS8moz36  
uvUClSwoErgo8a6RjKoDaopm7uPv2Y8GTg+SUDZoa+SHxyw4LeCcIytFoCXr  
Dnj3N2F+b24f1F9PoGDnt9YdLSx4u6bp9yVdAo2ke21rfM6CaE2dZBdTAtl3  
ff1f08UC2Uf3bMPsCfRYLFji9isWuNyiT/xzl5C26fyvwtskOvulprxl1De  
Wea7C+9YQCa/O3oa60PpaqmnqcMsmDPs4UbEEqjZf3DadIwFWfbezwpYBIpR  
uK0485kF0rd6Q3OTCLStN872+gQLdl29RA3E+nAq8UDM4Smcz2lb1qhmEqjY  
aEOJ1DQLnDpFJNrOYf06Pf06/g8LZquTXf47T6A1xc9ET//D9VeI+Iuxnuw5  
mqOvtJgND6fY8lfw82RZf69XQmy48muE5ZyN98On01PZImxwEWsy08gi0KJo  
4uF2CTa0ci71KGO9XqU9PPFVGu00T3f34X00cOzu6jwZNuzQk3W5hfW7Wg7T  
0nYZGxZT0/fZxhNo2MYxVGgVG342DgoYYX9zSGpXy+XY8OvK8d/0cAldqP7b  
5bOeDR/Er1/bcBrvFyfbFq9SZkOeLTIV+zjmo/fUkbOb2DD3SYIU6IT54Bon  
aGmxwWmilqFgg/kwkq0a1mXDgoG1loYZgTyKK2TNDbe/spv/ymgRaLUr23h2  
JxvcDnhTBJQJ9FLW+dSNXWwYMFuXk1hJILPo+RbyHjbcuXBhWk0Q27/fNK7P



iQ1Dc/GyезrJaji0rCzhCBvUee0lw0/IKKf648AONzbo5tMsIqvISEox0SDf  
hw0zRUKBXXlkNDndOekbwobq1WrqCgFkdL24YO2aCDYcCM/wfuJFRu6uwXuf  
R7OhSEmGcecQGb18uqJlh8mGsVYp13OmZMSN/tlzwmZDamQwtWA7GZnp1Apl  
cdkQ8P5Bnrw2GVXmuLrOpbEBaT9VS5cno4D92kklWWwYfxGwPm85GakJC9W4  
5rBhd1Lbe2MC21/d/YmSxwbNhzyjTDFs/8nCZU8us4HecLLojBAZHVAMMw0p  
ZIP5hx0HtOalkVSf5WnVYja83n3l2dRPadTIXX3pdQkb4v6bLzb+Ko3OGk+0  
c2+z4c+01pTOMDTa+vvB3M5yNswXqWT0DUmj78V8takqNljrtvDMBqVRkauH  
Y0EtG65bCLzmvPng7tQtTieHbGi7U073CD9f9Uz4rsgTNoR+6DD6PSyNXkb3  
vq9uZsN/L7bZ7Pwkjbg616X9WnG8l/fzb36XRmYfl3as7WCDuF/2gv2sNIpW  
nK+Uf4nzq/uvym1BMrrnGq07vpcN/Jha+4viZDSeI1Cq8IYN+x7UL52XJSPF  
PvpGpUE2rF51l9a/loycqUsKIT+wYXi12Q1QJ60U/ez1Kh/ZkL5XqdDQglye  
ccVzVcfZoKi3KL7fgowWP+Ou2PidDcFHGUeVncloqzA5Xf0nGxw9BWeUcX86  
ZZxC1pjB9aVJWRMaS0YD1RlLtBZx4PyhhhOhV8mopvjiLz0yB2qNrxxY+ZmM  
fo6tC9gqywHjz06iij9ktFGxYHzbcg7E5DSFdYkQKDvn2rChPAfuX7p5MIGJ  
QC961Y4iRQ58l10Ur66D90Pqzf6dKhzyKP9izgYIFMIte2GsyYGMkeJRdVwv  
JU919prockBHRtZq7H9/jySVN5tu5UDVg4qppjadwP4uufmAOhLCL9B91wvt2  
YrXhdksTDrxZeKdoloz723Rd+R5zDqh8soh/hPuB9snHN/fZcOB31+PsgOsE  
8i02VbWx58Anc+0dhbcJdGmsqWC/I7ZfzGE0sJpAvQqW8naHOXDgdkCq5yGB  
yK6t5+1dOUA7FL65s5lAu3P2LXPw5MDhw331Ps8JFN3bkXLQB/PDv779fDeB  
vtp0sw+d4sCvKNeOvkG8v3MPkg4HccDg2uXXH0cldPhpX8yRUA58HKfeOfEZ  
QKmkw3MukRy4zfb+/nWCQM+MBkJcYzhgf80kaHSKQALRrj/c6BxgZh+tYkzj  
fII950/B4sA82zu09Q+BTk17fvZMxPbeFTlaM4f3be0xL28eBy7b/RpxWCDQ  
O/9j7/9L4wBces24sjlChZ/OXwsiwNcr3wr+IIUtG/Mr9c3hwPXNGx/6Jlo

iKHw3e5EHgeG3sNtljAF1RwNf05XwIETaqMnkpZQ0M/zPy1PXuPAP6PJ87tF  
KGhjb3DjqRsc20tOVN7D2F32j1FgKQeoT35t68c42yai9vRdDkgU7M0ux/hF  
4r+tZyo5eL9o3m+FscjTs3eDazjgUyvbl4PPB5KAZmg9B9DxoWtF+P4QI3px  
WAMHFciHtwWR/vf7nvCGiGYOPFetE5rH9o9WsfIjWznw96YazVyAgtZMi8lF  
d3DgqHG32oFFFHRI+M/giZcc4DYc19ecj1DW0rHLzr3Y/pVeEZ1/CdSt301t  
+Qbns+hm5x2YT4r+Y9VtgxxYYau/PRDzbb07bHzDBw5EVn05G/iDQNYDF28t  
/ciBdIFq7s7vOJ9DI7b8/MYBx930Gaafch9mHZsZ+sGB6qeih2Jxv00yDt5/  
8ZsDZtvZocnvCTRfQWN0a4EDpn/KDqr0Eejnny9WvtIjLrzRvbpRpyvYv14  
VUuAZ1nDmsdw/p1c2dy5e1kCZM05mRrWE0izQYGj0toEaP1WHR5TRqDBiMOe  
gxojUDm0T+Yanoet/1ojHPYlQPGXp6+LfQgkJnUfmdomQH6Y1zF5d5y/ckWL  
dR0SYL6XNZjgTKBHiBFPuCSAjoYmuWUfgSrP7kht9UsAa/Ub63fqE2g6eaPD  
/YAECP5cwnuE55N03ooV188kgJlSvKG/Oq7X+l+58VEJ8L4g7LUh1iMFi0uu  
G3MTQKm3b0lNaQINETl+WvwEKIwvtvMRJ9Da9RxN+fQEeP363yFzJbhfGHuX  
/8tJAHth/9LQBTlQtbUPG89LgJyrJzY0/SUjqoex4euCBMg8y2BsmYejXpzc  
o8obCXDjZB0dNUIG7akSjMLSBGiyeXHCc4KMxAtmd2fcTYDs+fKn7l/liNnQ  
03a6JgF87F+dfDJCRo9fNvDc6xPAq3FqQWWYjBaN3Lbb35AAcueKU25ivRVB  
Su7TaE2Axz/L9y5/Q0YCvMbBvueYr9VbZuX7yYizcn6M3pUApQUt60x7yYi4  
suXb5lcjUD/vEkbvWxpts990f38CyOR23Rt4SUby1QX/GAMJwPslmWjXRUaF  
Jm+EtIbwfaFTpUMvyKjcaY9M/KcEEH62p3rfczJCH2grtb8mwKazbJGN7WT0  
xL963dvvcBcgJhgm30ZGVn8mVVg/E8ADLtRrtOJ5HKeqqTOTgOerYdqBFjwf  
pNz0B/4mQMjphmtpz8hoKCsLsRcSYDp45Z0vT8nIV6HDVFcwES7eWu9zCOPJ  
m0v2vhNOBGfew8jBZqwPekeOJVATYe7Czi03TWSkLtDA1FdMhAbZ+SP6+Pn2  
ZTrp3I2JkKVVaD6EsaV6/uVh7UTYXzLR/Baf96K873qSXij8+OZDCsP30xoR

t7cZJlLi+hnGBmzfYIt51YcdifC7ImbhI8b/OcTUJxslgonimHIt9mdisKLJ  
wDQRpvqky5jf4OPf2sfMU+EsT3vbHMwH/QYl7fbbRIBaQqVPeogIwnxA+j  
dolwkrX+1TfMZ2p62xf+wUSI8Qn7uAnznX/dcHbMJREGE9zzXndjvbElaHGq  
eyL8vVtbavmKjMoeFlsg70Tgaw2ffYrjWf9y5bI0v0R4+11049drMno7P6MD  
kYlwbriLD6twQGxmyNbd/OZslj/wXebz/gOe1jI9xRlwinL+VldU1SkazKq9s  
xjnY/hpF0Xd4Xi63u+eXdS4RTmcWNRn/kFHe2/GgXRcSYc/LWt6LX2S0wUcx  
ciIvEUipI16KOL/1olI5JtcSoc7tr9jnOTKyKww0/F6eCA+iek5+ESaQY5XT  
3OfqRPha9fcbR5RALi1G+0fqEsHnomjeJK4vz7eqV989wvb3qn+Ux/uC7zfi  
b19jllwnp2iuJON5sXjW+uWzRCiY9Ho/QOD9QWaoL0dx0+52/2UDIEilZ79  
ae5MBAsniTUdsgSi6d/e97gnEVS2bA1doBKIZZF9ubY/EZiejDcLSwmU5EyB  
qRhIhH98+dudywiU5ue79/ZQlij76LmFLcf1fdY2/8Yo5of/Y/8vjK9eXm91  
aSIR2llLzwWuIFBZ09Sv90IEcG+daD6Acc2XRxc584mgVPZ+/XX8frN0qsVZ  
YS68T7D/GI7Pb18XkRsmxoV/F9tC7uH7X+p4/DgtxQXPshuHurB9/aZ7zP0p  
XLjIK/enG9s/eFDngs9SLoQGW9+vw/6NHls15b6SC05nT4gmUwg0HiG4+4gc  
F75szt9jjvmYudj1fb8yF1jaYnsjMH/zZfdNrdS40NiX/ua3BIGEGi5nm2lw  
YXXX+CIPzLf0x9Mm2/W4cNr71jUxrH9kZ53PbTHgQuGBoDkLHK+VEiYtmxG+  
z6iCESVEIGVN2SxFMy6cqzzW17iQCj07hdJBy4cee7xWRTrKRNODogc4oLp  
nr/7KL9xfeXQ0wVcuBCyPFhtjc4Xh3r7nb+9uCC3v3l0E+5/fiK/UgbPcGHn  
h4d9iZ/IKHDI27H+MC6gVIdDIWNkFKr+xLA7igu2H3VSJ3D/o9ukjz5lcGHd  
5oj2GjzPHPeo7Q1sLkgHo0vvcP/jBXnx6riYL8l/rfveYf2dtcXgTjoXFHvl  
Ojze/K+e1iTfPMeFbNfXIRK4Pq7Vkd4UXuDC5LDpipY+Mipp/7o1/xIXGiQS  
Vl/C9XR3sJubc4ULxYxXn5JxvVVP1Q5lFHhB6M/BT1m4X9YLXdXn38T+ULbF  
1eL6bFyalJhQxoW34YVrF3D/bFEJfs+4x4WIA8+Vj2IsdsjQzLWBC0N/c45r

4Pq2TBAoNujC9vl9vSSAn2cv0zWZ7OHC5hvpYnyMP1/2elvYz4XtutsjTPH5  
BpqZwS4DXOjN712+Dt/PrmmWpg5xIS3dR0QJ29drPnutZYQLC0Uj/rbYfpXu  
jca0TzieUZYB17F/oW5HXm/9yoVVJXxdDex/89ekoG/fufC5997bAczP8vB6  
yas/uXD5fBm/doCMfISnrh6e4UJ36tkzLZjfyhQFkJnDfB9dWSKK58+StQf6  
ni5wYSA70jUMx8ehmBkYI5gEXR/yylZ9JKOr+pxi+kuSIKo/tnES9xMzm1Wo  
QCoJVHd6Pt+B45/xxurVIUoSmH86JFn+k4xGfaJPEUuTwPHeTL437ieM2Pf5  
0WuSIFxeXH0RzreG24VLnNSTIHGG5iu081t2Z1+etGYS1AS+MLbB+e/ZlmbQ  
qJMEuuUvBiJx/Qh+8Duhsx1jlcmlJLx/2p66SPqMksBJjioWtIZA+XMduXnG  
SbBw4ucZY3kCGVN1X0hajoHI5YIF57H+T7nk5duwNwmW2ErdVFLBemBTpmDE  
/iSo/zhlk62G+4vZ7JaPjkmQfVg223gzgR6G1Gc/+i8Jzpr/HcvA+oMsNKUT  
djwJBtcyRMK2EciVp9C2+WQS+P8btd+9He/7RcyFnOAksDxkmFCESf7bUpll  
F47tvaQrgPB+kffwk5ZYdBLQo6QePDAiEPRbeYYwkoDHOKWYaEIgnnf0v03s  
JPgY+s/plSnuF103Mj4kJsE73plv5N0E0jz7fvN5XhLs0nLeuM2cQGfFZZ7u  
T0uC4VpNexsL3I8yTdxFspIlgKTu01MGSQHKKwX/rzicBsfEe02oPgeoM+zap  
X06C/mnq/SV7Md8XgqU6riZBwuX60acY+/6T+Xb6ehL49knsjML6q/512fNI  
JUIQ6f2f8HprAi2t21d6vywJbq/YcbYS40fR7ADBqiS4piqZfN+GQH47G7T3  
1CeBccRwLGs/jm/9tnv97UlgWmzowrIl0GrjW/q+b5Pg9LbIW80YBz1WrP7z  
JQIY97rJhzBuMck2ZM8mgeGtyDV78ffBp05/HYuTYbUjN4iHz1/fKP1guWgy  
WJQXnLqN7w9VvnmXRiZZsfzU/QxbmdaxriSk+H+dlWle9j+8N0Mo2vLksH3  
U0yVbOxfR+H69VarkqG7UX25IMbKIvUC3+WSYQ9dhuRIRaD05tnH+srJcHCj  
2cGlmC9Vy1NmTbrJ0FqpvE4P8x19XXLD8a3JEGKYWhSA4/FSrHiJtGEyKMZd  
enDNjEAxLSPNDruSgZbikCuG49dr5bxndH8yaJuL+hbgeGvcnNnIOYDvD/S9  
/BjnA10yQ0LDRkCO7uiBnfi+LZ3tj1xTYbMY4FrZXH+sKzNbEgnsf3MJ06+

BgTSt9U6ojiYDLsmfz+VwPurhMHZuGW8ZGha/D2d0Mb5sq6tTCwtGf4xdscu  
x/qYNekjNXk+GWQPcEU1cD738/KaaouTYX6+TiV2I9bLoRO/Sm8lg1LuP/08  
nP9xroaKBXeSYQMrUbjBlUDqmr0xnPvj4HBN5ugqXC/Rz6UNDrYkg58Y5QOB  
68m24oiP5fNkYE+u8XdVJNCGi8UZ07qSoXjW16tcgUBzzD8Nmq+SoRJeycli  
30G/+4fCa+zFAHwLw/o8FA1biw0ngwuXrnj0HYHWSZ298f1zMqgMKFf64Pp9  
9nal6KupZJC/ttz03FoCBd4s96qdTYaAR5bBP+TwvEeq7/cv5oGpUMIUGMbu  
yiHSpiQeNjrouG3GWHyacmKjJA8i5P4r1cL47pOSZoLKA0tlTpk4Po91c25a  
aAUPVO+NvWvE+HC6pdLMah5sPZPcfRvfb8YOqJmU48Gb19MHDdB9mlFZdl/k  
edB2etH6NoxJXqOxA4o8MKqrspfb/n13lfzRq8yDVboW6xox7rfSLX2hwoMJ  
N4N/NMxPiS5toEGdB2onFhevUMb7n0rRmToNHnwWrxicwpi2ukOiUpMH1p+5  
X19uIJCDkNz2Yl0e3P3kYn8bxwNmTDoL9Hgg3r6VchPHS238+LHcrTy4E/LD  
/xa050JXVSbfbkAcFl561Pt2E9+/LB36GmPCgZt6QZ4Xzo8L+0k1rMx54LrY2  
/g/nTyPpq/cGcx78deVFMHUJ90E/el/PHh783C7EfKGH46F+p26LHQ/E6F7i  
qbi/Zd8ls3+48SAgq0JIIs7vlq/Dxi0ePHj72unZC5z/lUuv/c334oH03Yqm  
ZbheXoXu9Lc9xoPsGpGQAtyPZHf425Wd4oG59b3KKlyv3Ccta06e5cFg6vu9  
OU4Eygle9soslfg3L3ZLth0i0I0NHjy5OB6EaRI+s3g/fMaeFWhn8uDSyMOv  
Fi4EEt6n+lE9iQe8h3X77uF9kroQdEmIxxwPasoLjxx4EUiytP/SGzwP7uQyd  
Nk8C7a14tiWk8yAnRCSz3RvXaw/z9uccHtw8+Hyc4Uug5PjO449yeZC3uyfL  
/TiBcrfKKWxnYX87Sj/qn8B6MPtepkUBD0rKdgW3+OF+tWfx/nVXeXAucdMW  
tj+095yV2J9CHriT9mWjkwT64/Ih8loxDzjd6U7Jp/B+TtbUi7nJA59bE7pq  
AQRa/jDi28FbPFBQf195H+MNgU3XNpfx4I+E8NVdgQTSU5BxX3KHBxtlpmse  
YmzPuP6yvJwHF9Oyfs+e/t/vx0a7vat5EFmd1mgbhPmqftHk8YgHp34K9Rue  
IdAI183c7RkPUgtzoowxpoUUibi280AqbuHAJ/y+nNtks0snD1oj3py1xvi+

5Tb2kR4eNF8VPBOIz3fUjbU43M+DRStMb1nj+5VVrxQ5v+GB2x3Xw5exvb/W  
PBV1HsD3jZ269gH710D5euzQID6v4paxDMYpS4hnTkM8WLrhYL8G5sN1TlfN  
6QMPxvUvyeljvjZPOnIcR3nwdbybpiPms7U/z/LgZ5x/e1Of9+J4ZD9vu04w  
zgP9heJc3jECHWv4KOYwwQOlo2ymjg+Of4lmi/0UD85uCT+yzQv343z7jfY/  
MV9li4vP4/jnZ4Ym2E3zYGFkS/uYG4F2xtbvsZ3F8WUk2hri/JEK/lC8f44H  
N36tp5gcJtAbXxGJ/fM8cFXd56mL8y/U3qbVWoAPhqOWUW0HcD+wCFK3FuLD  
5SBe/hk7nG8oK3GfMB82v7BdRsLz6vaGQau9Ynxs75YbvXh+xKwWumklwYep  
7mdqq/F8tiZUJK2k+GDDaLhniutlfpZkmyWFD2Gh7Tct8DxQbl/Ya76SDxm+  
ji+/4/r8+UihZPdqpoyP32Yswf38ccVuqd1yfPhzU+iulgbm81Jyu+l6Pqi2  
nKl8gPuzRsYdDVNFptQvFd2ggPvJH0dVkokyH/6ejdh1Dvej0FrrXep8cGY  
M1Jeg/uhz7Fdt4zV+dCwcv/VY6txvrn8J22swYeXhXFBKlhfde6+9Ry0+cD0  
UBrox/uMxKqdNsiAD0UDdwwlsV5b1BbfucoQnz923NwN7yM/ojvs/+zgw0W3  
ldpjMVwPQ25Od4340Jbs97psCYHa0q6/5u/iw/4qnSs78D5Sb/bjyElTPqzY  
sepXD95HCq/T3dUs+OC7oyxaSwDH/3DbhyV7+PBVg/CcwnoxSWrpfyNWfCj0  
/KVcv0BGQYGFx/Ns+FDBvJkT+w/rW8XvX6Ns+UD6qP03CO+rzj1bTznb8yEm  
5GJS0F8yMjZ4FrTukQ+fxPjFmXi/0Run/P7hxleuuKbBaqxPVXOdw1448+G1  
rHn+J7zvrLYp+FtyhA9nQ788UcCYLPA1KvEoH7Yf46w7Nk1Ggne3LPJ14wP3  
0j90Fd6Hpr2iabs9+DD5ek2vLMZvn0rHC/zHh2FoDvqC9+2GTZcSan35MHPc  
+uqXKTK6ztfmhfrzYblW2CpZjPm/HqfpBOJ4eorHeWA9Hep04NzEGT7I9LUk  
9H4nI5lP2cX9dD7otpHzxTAuCR2sbUzlg9AyiWP/27/S3gQ8is3kw9rV0t1V  
GEeAYJPheXz+deNyF3y+e0Fay+9cPnSnLbq/EttjLqLccTufD6hU02Uc480n  
Kl76XeXDto7cz51Yvy/tM09Tuc6Hm81ip1uxP8OZx4dyy/hwleVP+w/MR7+0  
r8jp03x40nn4Kh3z1/HcR2P3PT7YSxgtLMf81izxDv9WyYcbXoUZe2bxfhDi

SoF6Ppw0LxV8ieNjefCA8ft2PoQ3Ppe1xvGGH3Y+9zr4sLCd4UUSxHon2Taj  
3Ymfb9lYU4OxYpN1v1YPH4Kuer7ZRCLQPz3LQNpbPsSv3c+j4n23dOnOfIVx  
Prh4bxLqlcT7/e0dzb+/8uFShBY1EefrhX2GEy3f8P1v00uRNIE4zG0GQT8w  
H6Hnx3LJ//v7n05nwywfnt08Mm+G9/NDKdozWXN8CGjcIPYF4/0aWnJ+83z4  
Ls1xT8T7CPLW8KUKpEDGBp1Djbg+lvWoCHiLpkCqyGsJmeV4P5dS3iclmQIx  
2RZW CiuwPjBVyC4np8CK07IqCri+3kbJj7rIpsCN4NPuxCo83+6t0V6yPAXi  
2Lm14xhXfF0ZfWtVCgQN3dl2B9dngdLyZwfXpuD9JbDBA+87/CPUpYsUUmCV  
c5zkAsbR6RT3a8opIJER0sjA9a2e+rSZqZcCa40T105ifdPHi9nsZZYCYf+9  
kF2L9U2p9Bt3+30p8C/OvK4DP2cm6WfscKgB46bYveYYH5FMfartkgJ+bM9X  
ifg83cSJuXXeKZC/vvfUFXzfxT05GSt8U+BEwvcwBYzFxC01CX9s35fHGuew  
ve/ZVzwWBadAvYG08knsT1L84WcDjBR430EmO4D5mTUT8+xhp0BKQYSJNsZe  
wpX/2rgp4Nckv4WxjECGDBmt2vQU6LwiNqy2IECfaM8yz19JAWqEybykHI/c  
modnrItSYGTKiP6XgufjdKWd4M0UgDUSr/wwFtUs1aooxFepvtpBO+TdccK  
pY/ftQH73ZNBnhirvE1v6byfAg1BT1+G4Pin2tDjDR6ngMA638r//V7so++2  
INqZAhXDhyhZOH92yKGQvsEUkDx+kr8f42t8dR2jykg0xbpwcGYQlr17dq3  
FMhOsTMRwd9HhooWk3+nwFL9p786MB778ts7dD4F/my5s+0zvi9H6ZuJukAq  
fOAqv8vA9tgeHV0/SEqFe2JjL5yw/UvOvV2UJpoK/c6bn+lfg2s6Xw7slkyF  
B5oGMUo4/zjOdrStk04Fv+HZiEKMAyRaa/6SU6F7q/GNzTgflc0eZ9+STQW2  
Ak3YDvPHrypzWLY6FeJd0pQ/Yr7Vshnjy+VSQWzlQdp1nJ8N4U60lfKpICl2  
utUX5+fM9sUlaxRTYUCP9G0Qx8+1zoakqJ4K2gVp14txPszmKp5X0kgFJ20n  
IYM4X9LOzmhu0EyFE+xHzQsYN0PeYTXdVKD/vR1ijvXy5sff7mgapsKT5w5V  
FXgeNV9+bKGNUiGVwQ2xwvrYnZ75TgdS4XpPk+cAxhmmO8X1TVJh5E5w5x+8  
b8w3JbnvsEqFlwaiytJ43mmz9ZLAJhVM2NcVRbE+9rYcqNplnwq030LLZjBu

a91EWB7G9ke6itzD+nhRUrfhXtdUqNq6Vj50HeezdZSPjSfm9wjliBnWyz5k  
pTQ7n1TIrctqmcc450XrA4cTqeC5iQi9gedtR0rQF6dTqcCJ7Pe3xvuUkP3q  
ZUeCUse/2q5mDOPjPcf9PSJTYWz4eeKMJp6fjvefHKPjeH2PtHqH57fBa7E1  
pxLxc/39LjIYj+cfORQUjYKe612KWnieS86WNQSmZMKw/UWQuCx/q47k4lu  
pMI6uuSB3xj3ss08F9WkwrfBPqdqjK3u+lm+f5wKsW7DFh4YPxhI03zUkgrpq  
TkMLo/h8bdGapZe7UkF5a1SfKcZXdYbn4l6nQqn/Id0YbM9KF7Fhz+FUEPST  
98/A9iaxtJ6afkmFw5fPfgBhf5rXmBrqfUuFC9Pnun5i/wXuON5S/pEK07GL  
fh3E+Mzbs+lL/qaCRNh//wT/9/+GgakiM/Op0Bvz4q8V5vfjksKIjwJp0D9j  
48zF/B/Wbnd7KpYGOQEEj37i+JjEr9ZiWJkGH6UuyB3BeqU5I2xEXy4NpEut  
madxvK2u9uR8WJcGrB208jicDx33d0z5Smmg/DBUMgfnj90TnjhSTQPHV5dX  
PMT7ZM/Lr48+q6fBpUVXUqZwvh36YBmeqZkGjNo1mpoYuwuSPn3XTw01n3/L  
23F+jlLc8y5sT4Mp/wLpzRj7rn9w0HJnGriftTyejfN7Qmu19G/jNFi4khxL  
xjjAKKzxsIkaWHlQxfi434W66mz5tzcNBap8bEpxv4s5+/Wyw4E0yDO1+fsL  
10vu326XmsA0cB277nQU11NNSN2K9bw0CBiUoIzj/KTr5yZKXhrsJwxDxPD7  
7Zs3GguUpsEP1bzcXoxfjbg5TD1Igz69qvA2fP7gWKbv0PM0YJos+fsC3/9p  
V3t057s0iDwqjv0c2zd1USj10bc0QGnGV29if/7+NSi8vZAG+75tLnXA/V7I  
MeB+vnQ6aETZrr6DsdeQqrDXpnQQTbHzssS48cSqzYY96SAvs5hTgc9zSeYN  
Z9qmw6qqpTf/tz//LkPBlofS4axt80wevl/ld/b5Tz7pMBVEHfTA9tWvsNA4  
dCodakRqRquw/Y6Gv+ufhaSD2xXZcVGM2bF2o8XMdCiTmmrOwf1Gw6pvyW9u  
Ouju17s/gvtR59Kjqsbp6fD4kTRrE8arb/ie6L2cDufSFkEd7l/1wd+5CsXp  
UKx0MFAUYy+j4Fv+t9PBZfdDSUfc70p6YqeEHqbDjtx9UkK4H9peWiJr04zP  
Fyqr9sD98/dx7pbzz7E9h6+4tOD+mqMnc3C0Jx1Ud7asMcQYFp8L1RpIhx8m  
j1ZV4H7Mzii43zSeDmtX5bt34H7dubF0/sjfdJDON7KRx9gxZc+U0KoMkMtL



b2Tj/j4wMzpSbJABRS+/pEbi5zGdbfnpxhnwgrP86mJ83robd4+etcyAcpN3  
qVcxfsQ4v/qYbQZ0NJe80IHv9zxK67M9lAFZb391HcD2bmn9VbHbJQN2vVHp  
eoWx8LZjGYbuGcCwUJD2wP69uvImSMs7AzBp5b/xvgaxcZ02TcDpLuu/E7H  
flSdfay1yj8DfuRZLEaYL8txPTI5MANuwPji7xh/ebKm7U9YBnQ7euUHYr6F  
b/Z/ux6VAVvpd2224Pjlp2VSDsdmwPnS63sW43x1cCcc61gZUMmKvHsPx/OU  
RXv4ycQMsBU5PjMk45+gmXBBnpcBY7VBwcdwftPCw3TMjNAYg91ZBbnz+uR  
hyTd8xlwdShatgLn53RrtMpIbgZYao4s047zb+P5Gb/dVzPgod9x5fu4Xs1o  
93gzRfj+NX4hB3F9ux4LvFN0MwN4gptVxjH00B+fEb+XAX2T5boLuB+0kryR  
f00G1GzlePzC/WLxy3dxHY8z4FDv5tbnuJ/o5Ts91W7JgJcdGsXk3G90nOqS  
Su/E96+XKtqyAfcPiaZzTu8xPx3s+G14vhgVVSvKfcd8f+hX+IDxbTLn3FlI  
E0LXppzYg/uXYqiTILR2JvwOs0yk4edvNz40TzDOhPuvuH7P8HkZ71Tilthl  
go7encrP+L59qbzaOI9MuBp1Ku0btmfj7pnfC6cz4VBGxIYRbO//ASjrxBI=

"}}},

{RGBColor[0.880722, 0.611041, 0.142051], AbsoluteThickness[1.6], Opacity[1.],  
LineBox[CompressedData["

1:e]wVk3k81lkbx2fLkcqx2m]cpZX7nHXkaj5TVrW7SkJbP2mM+xpmxpfImdz]  
bZZyRGlFkiIjZV0pKdHSEiaVogMhR2h3fn88r+f1/uN5Xs/zfj6PMiPAzn0N  
iUTKFcT/s8Xs888sSRI1+i+7YOefXan8tLHqj8HD1Ie6u3YI9QBRDxQ5lcGf  
qAcnag7lrbVfGtsb68+y81QneQUX2htHdL8xtT8bvEoN+JRtG6ZwHck1HdWb  
fNagUri9TN3ZBdfZb]NRWRG8ZCj4qk644hlF8V5VhXhOL7X03DfywMJMh1V4  
sDhoDwaHl/d7IfUob+xSphTm/RjL07R8UMSTKN/gI42M+91+20d8cYPs5sem  
/QCbnUPj3j6ozWUpzcguwV60fusmjuZ6BuQmKV0y+BBjjj7RTgQ70zd6so6  
yPBURvDZxg3EUh4vVLxIHp0VGw2s5VjY8FXCMihYEY9T3U1b0llQOOZGemGz

FQubo850LrMgMzw0Wpy5DT8THeLBTmxsS03YYx+pjLv37u9svsmGhiXlsqjP  
dnQznoZmrOGA8mlI5I7Dj7i/kONdu58D84IELyZNBfvNL71/l8SBIQ2IU1ln  
B+LmM8d6WzmmWR3S6pNVxZQv/XfJRQ4cryWkJgqpoZ354JKaWhBOHKdMmU+r  
wcMu7XzeoSB4iQ/bTr1Qx8FfExp7Q4LAuptQU9KhAZVk09dW+UEI86f84HhT  
E2/bRvpovCDEK4TYkVaGKp+Ya3cF4SzjxOeNyZrI+h5/Wa9ySDkRFBMA4N1  
cEBmL7VaiEChznD+jwxdsAulxl7JEigbTljpt9FD08cko381CfxjTdZrV9DH  
cp6t9U5zAkOFk/zCTH2kflsn17ifwMv51vST6wzg/NL711uOBMYO5NHsIg3Q  
VEirsGYQeF/GnNGaM0D210aDOX4Ejr/tKRX2ocC7pmxtE0FgxpFsz+dT4BRR  
9YgfQWChalkI5/ATChoTXknFEVgRaavNfPQTRLIOy3inECCdyPPwoxnkvY  
2mo6AaHbTBnr24a48LG4lZ9DQEzS6sFWHSPknj8opxPQMKTHTLpUYgRq78nS  
3glC0k2TGs9kjWGiUEcmXSSwRaZtsPKcMeRHiZq6UgLyAXkp8UImuHvU4PF3  
ZQS2dTA6GEmWOonl3+4QkBlq9Un02kTJNY/TYwoJ6AeQi7c5LETGk4W/zRd  
JaDTPXng04udELee0mmolEBRa/v3/iFTVF3e586pJGAclVdd3GGK+PHqhs8C  
NnvOdAmzNIOl8q0us2sEqHpW0vY3zRDkr3j9sICtEsitOhrmiAoXI9EEvI8/  
yREtMke/d9u4iIB/M2lTGf3BAhvlW7TKBf00peX1NSRbYO7cEUMtATu+Y8Zn  
kyyxacVLJl0wzzGqlQkz2BK1SsUFg4J5dRM0Cw3mLaHT0SeyLNhnTbeU8Bdi  
F7xnPO3WCLh/y4Jv/Zdd+NjeJTsr2L/Cebj3FEHFrZKk692C+0SXtZpSv1Ch  
KGGsl3+ZgOaCvW2MGZCdXRNif4nAt13mt60agDFS3Uyh4N7jjCof1a8Av/3J  
Wkoxgd54ZaV1ZjSsevEuNhQSuPJENO4RjwaZB6T26vMEbJ3/trPj7YaceXvT  
PoG+Zqf3ihgu7QYn45XpxSyBHmUNvM2me1BqOej1JYPA0qfibQP1e5B1M7wy  
8xyBkgj/yRP1Vpg59+zd1QQCcxdkv1vW2NTeeQvSaEEzOV8F0tvHoDYnPqE  
NAT6FJ5bTX/iiEfiyUjAv/E30nrH1F0xt2XYiN/BQTh/fuD694luyKU+Lqi  
vzYIX2m9kwo8D+w4MffbeBEHyTJDcaV3fIBDibGnjDkwmuUlsiqYODTOnFXu

YcN9Y9L7Zi0WUK9iFxbERuDI4jhLgwPlTkkxYwk2Avp2bLQSFvxNz8H+udss  
hHdbjPGeB8PU5OnKcRcWHiZyc/t7TmJh+oPRfmEW1nte99t8NQwmfxKrm28E  
IkVog/xyeTgu6G6Qv3IkEHKXbaPOFEfCYSZk/bXvAnGgVkpOD7NoaM5lqGt7  
BOD6Qpdh884YjNC+jJCbmEjuehKyvOM0DF4U5/+qyoRwzlyqmFostN1+H5c6  
4w9Rkw03vH48A707s7Xy436lJtptMyARh6vPPCvOHPVD0RV5R0WJeOyWj5cQ  
afGFEWMTi70Sj5G5v6gBjr6wUyJ5kt8mgLRTe1q/xgeSDRIPs14nlutzljd0  
xQfW46cstz5NguxbfsxCiTcU59crRT5NxipfwoJB9sYp4bQB3a4UhLrW2Srl  
eOHwFdaV6bqz4BeFLxgqeOGRvBoXG0qMjrF7GvPe+KexYCOduk5HGUE9VW  
9YSJnYGDytk0WNgu2jVeuDPUoe5EKt0LMpFZq9YeID9jrbXoyEdRL5rgmy3  
u8BXVNdZhn4TimE73TMHa+5vq8Kb2Qg4gK9Mn3KDZE50ow/VTNRuHtm4+tE  
N0yc7uSev5yJRuVkmUZ5N2TwbjjKKGThgqd+4PhtV4i9LH8UfiELBpq6gxM2  
rgj/K+imyGUjZjyvLzTOQGPIpfl29GwIbd1b9SKZAaHfWXdkJH0wIXZQla/G  
QFLM4bcV8TIYV2Bwyu6xC3q1qr8dX87B1KLD/J5gF3xoV3y8FJqLnmeT6Tfl  
LqCVN6goTefig20pb307HfVFopU6M7mYnmgOy26lQz/X/ifLuVwoysU4KbXQ  
oRQ7SXNazIUIqT+G0kTHV6ftj/JJXERuTznsxKOjRio5b8v3XNxsr5Squ0aH  
ysmjEpIULn4rURyJyaXjPLMsR8mQi1T1oWuSOXRlu88q6BpzEWE9WICQRQfj  
LlXLxoyLMLFbi7x0Ooa1mvel7Obi2Eft17PjdOTy1WNFDwtYY37OP4o08X5i  
vYwDF6GVXR2rEXSc6WrJUD3CRXJHY0NqOB1snlPxz//jli1uhFQVSseBrPS7  
sa5cFLsMiE9z6GhPGrbKcufi3hud0Wg2HRbRml0lnlxMRcX9/T2LDk3/tsFm  
Xy7+uEeRN2TScdH1e0aPPxfkltPMdj86ZI85T7wMENQXdi46+tKRblsROM3i  
CnQQJca96RDdu7jwL4eL6Aj9TAvoV4D83NHTg==

"}}}

{RGBColor[0.560181, 0.691569, 0.194885], AbsoluteThickness[1.6], Opacity[1.],  
LineBox[CompressedData["

1:e]wVz2k8lAkAx/HZYpVzG8WEwU5SUKLrXDz/YUKH0nRLtTtESTJkkMkxT5Hc  
NPOsakeSWzU6dxAppaKDXWVaky2lUrkXm2zbvvh9vq9/3/P2c3dNo9Fo07/2  
vy4jT4f40jSChpxhzbZ21+6s17IPAiURZu/u47g8k0i4y4ysEnwkRAEDBXdx  
nSNSAI95DjHGIFPGmlcC+xqIR6+cNqQLpogacsxGJmwh0i42y3RDpuFNCzce  
0fYHcSEiwuEF41vc8eCL7XWVxO+2zPrzzTORuW28TrqshxgfbuYIBVp4RA+z  
Ttn6lsjYKn99Nvc7SH0vSyMHPHIFcu1yjRA65lR8E8T9e4i4FStfqmDoQey7  
x3V/1ATRodAeIQb1sbSRPitvYJJ44xR4taR5LjpsdDtEaV8lJU/argcETFil  
WUK1zOkw8guk/eljAkH6JCvliCr0lV0vTueaom4dp9v7qBosXG2L1UJYeHCc  
UeNbbQGfqs7LDoY5uKtk1w4soEN8yNYpXLAEd65IBZvZhpAuUZ6Yx7NChcUz  
37S9RihRpnx+4rMU28ZK7B5KmOiS9ndLc63xrNZAT3fQBP3/ehSphtjCRmZb  
l72RBXpDv8XvDHvY6Xbyag0WwI/gOIQJXOHctDK3YIs1fjTYO1F0aQ2CWpk7  
ObHusJdmTmU/3ATxpekzVveuQnjt1pPnzB1QDoT5msZx0de3dsYr1QA8E31o  
4a7ejE/s9n4jeRCChnS0m17ehmP6XUeKakMQBROHTuufYDciP8qvDEN1ufHo  
wXAedmmm9jVa8vHB++Kc2vhAhD+feMu3iATX+JPn0Lkg7O+Yr8lRjcIKIoAb  
e243hI9cXsufCsAcijbzza/BvaOU5ElbDPwmEm04Z0OhHnwhdE7FQawzLDRP  
EIUhTUXDcLJciDHHzkNORDgMin0TDp+Oh9dStzLeMj7WXLfQ+cU5EXPgwsuh  
R+DCeOsPjY5J8MoYeN7yJQLHWh9GT84XQZBYfbupMxKqScPmMxeQcGI+Z5k0  
HICag0b17nmHseePG49zTkWBTBD5KLSPwM6nePXYAEKSG03MbWTUWU0N3++  
WzTseLr8iM/JUNEZauifVp1kxY8tzcF0/2Z9aY3YqBTo30vr+conHZ3Za5I  
jYXn2zhXk8epUDcubHdjHwRzTN04/vExTDdNXnVCJQ5xqlkKq9Y0eD5YeWP3  
jTisL+WXDl5Nx8rbzgaMUCFaFgpeHLmSAbM/7/tlsA6h3kWxZHFRJraEtrXz  
7x2CA9dmo1l6FrS64t1798SjrGjjaDQnG4XehfL02QmleMP2CqrJRxRkZZE

lgBNQ8LXzTkHCheGh6VlInqovS+11TlozlCpnxIkll5M55WZ5+Kfl2lkT0Mi  
3onuUyeLc5HXN/bxZ60k5MirN+kb5eEmciPZG5Iw86/yFuGpPCw3sR9NKkgC  
J8XIKs3g00JG6m4q3iShLrp+Liv70KoevvacshBBZQu/9oyOGIsZebM44SKk  
Jq3vrUwWo6mhk58hE6HdUv9kkxRFyVaf79Iry/zXzwT6wE9OuDw7OtSbDL  
a8yMByWQlOYHW4WS+K1ArWrJsASV47cMHPeRsJZsWOY6KkG/R9NVdhgJY7Kf  
7T8hwakHa8o3hJP45M/aeYJGwTTzVkzsARIXvzuWrzeLQp3a+5v1QhJmMVu1  
dWwpdH+2pDtmkDgZVi2/oHCfNvRHrdMEvRdI0ZW9hRqvdu7NI0LgZlj70  
FGL10h9xc0goLRu909wpNBi5m4SKSUi6F5Jq6ynwGGujTvxKQutJlLr+Rgov  
pwIVBVISH1tv5phvpuBxTWZeXEAIQu5/evk2CqvPDAkvFJJYk5d9nQygMMZe  
x7hVTOJ2qpKTt4vC5/M+d5pLSLgkLmo9E0xh0bus7a2lJBbta3rWuJdCeeNH  
r45yEoUBS3ht+yis3KF1UlFBguG3491f+ynUNB18qqwkke1bGT7Ip/D9qMPU  
iyoSal4T418iKZS999TsPUfiPxNtum8=

"}]]}},

AspectRatio->0.6180339887498948,

Axes->{True, True},

AxesLabel->{None, None},

AxesOrigin->{0, 0},

DisplayFunction->Identity,

Frame->{{False, False}, {False, False}},

FrameLabel->{{None, None}, {None, None}},

FrameTicks->{{Automatic, Automatic}, {Automatic, Automatic}},

GridLines->{None, None},

GridLinesStyle->Directive[GrayLevel[0.5, 0.4]],

```

Method->{},

PlotRange->{{0, 1649.97395}, {0, 976.5163393}},

PlotRangeClipping->True,

PlotRangePadding->{{Scaled[0.02], Scaled[0.02]}, {Scaled[0.02], Scaled[0.05]}},

Ticks->{Automatic, Automatic}] \) \!\(\(*

GraphicsBox[{{},

{RGBColor[0.368417, 0.506779, 0.709798], PointSize[0.6], AbsoluteThickness[1.6],
EdgeForm[{{GrayLevel[0], Opacity[0.3]}]},

{RGBColor[0.368417, 0.506779, 0.709798], PointSize[0.6], AbsoluteThickness[1.6],
EdgeForm[{{GrayLevel[0], Opacity[0.3]}]}, PointBox[NCache[{{Scaled[{{Rational[1, 2],
Rational[1, 2]}]}, {Scaled[{{0.5, 0.5}}]}]}]}]},

AspectRatio->Full,

BaselinePosition->(Scaled[0.1] -> Baseline),

ImagePadding->Automatic,

ImageSize->{10, 10},

PlotRangePadding->None] \)      blood

\!\(\(*

GraphicsBox[{{},

{RGBColor[0.880722, 0.611041, 0.142051], PointSize[0.6], AbsoluteThickness[1.6],
EdgeForm[{{GrayLevel[0], Opacity[0.3]}]},

{RGBColor[0.880722, 0.611041, 0.142051], PointSize[0.6], AbsoluteThickness[1.6],
EdgeForm[{{GrayLevel[0], Opacity[0.3]}]}, PointBox[NCache[{{Scaled[{{Rational[1, 2],
Rational[1, 2]}]}, {Scaled[{{0.5, 0.5}}]}]}]}]},

AspectRatio->Full,

BaselinePosition->(Scaled[0.1] -> Baseline),

ImagePadding->Automatic,

```

```

ImageSize->{10, 10},
PlotRangePadding->None]\)      liver

\!\(\*

GraphicsBox[{{},

{RGBColor[0.560181, 0.691569, 0.194885], PointSize[0.6], AbsoluteThickness[1.6],
EdgeForm[{{GrayLevel[0], Opacity[0.3]}}],

{RGBColor[0.560181, 0.691569, 0.194885], PointSize[0.6], AbsoluteThickness[1.6],
EdgeForm[{{GrayLevel[0], Opacity[0.3]}}], PointBox[NCache[{{Scaled[{{Rational[1, 2],
Rational[1, 2]}}]}, {Scaled[{{0.5, 0.5}}]}]}]}],

AspectRatio->Full,

BaselinePosition->(Scaled[0.1] -> Baseline),

ImagePadding->Automatic,

ImageSize->{10, 10},

PlotRangePadding->None]\)      gi

```

```

(*-----Next Mouse dying mouse from Tb
with 6 parameter fit-----*)

```

```

vn=readTac["C:\\Users\\exx\\Downloads\\TbD120M8, Liver 3.6245, GI 1.199, ID
3330.csv"];

```

```

Lv=3.6245;

```





{0.9098736039718, 0.02121659675083076}, {0.9999999090909091, 0.10024804094746914`}}},

{GrayLevel[0.55], AbsoluteThickness[1.5], Opacity[1.],  
LineBox[{{9.09090909090909\*^-8, 9.090909090880112\*^-8},  
{0.0874367476365131, 0.08090369567458766}, {0.18222810297558026`,  
0.12746559200130417`}, {0.27073779576926765`, 0.1116266937044405},  
{0.3575112797365835, 0.046963725126600256`}, {0.4516394623155443, -  
0.04509050859182233}, {0.5394859823491253, -0.11115559892361665`},  
{0.6346872009943513, -0.12642564594664163`}, {0.7281522108132057, -  
0.07740196037964171}, {0.8153355580866803, 0.004179083230780074},  
{0.9098736039718, 0.08937493944143977}, {0.9999999090909091, 0.12834702174618903`}}}],

{GrayLevel[0.55], AbsoluteThickness[1.5], Opacity[1.],  
LineBox[{{9.09090909090909\*^-8, 9.090909090875369\*^-8},  
{0.0874367476365131, 0.07984396759533968}, {0.18222810297558026`,  
0.11939549826670079`}, {0.27073779576926765`, 0.09184904274707059},  
{0.3575112797365835, 0.017913117173780694`}, {0.4516394623155443, -  
0.07109962300031061}, {0.5394859823491253, -0.11717052830989395`},  
{0.6346872009943513, -0.09879571259704382}, {0.7281522108132057, -  
0.022693471356141894`}, {0.8153355580866803, 0.06128703302641453},  
{0.9098736039718, 0.11605625481609519`}, {0.9999999090909091, 0.10415981267620744`}}}],

{GrayLevel[0.55], AbsoluteThickness[1.5], Opacity[1.],  
LineBox[{{9.09090909090909\*^-8, 9.090909090870287\*^-8},  
{0.0874367476365131, 0.07879243663407876}, {0.18222810297558026`,  
0.1116081822210312}, {0.27073779576926765`, 0.07372482040530459},  
{0.3575112797365835, -0.006267252216927747}, {0.4516394623155443, -  
0.08743897872291118}, {0.5394859823491253, -0.11109134853087661`},  
{0.6346872009943513, -0.06371549528296311}, {0.7281522108132057, 0.02544576624054603},  
{0.8153355580866803, 0.09464282937855747},  
{0.9098736039718, 0.10731931496853601`}, {0.9999999090909091, 0.0516787429232188}}}],

{GrayLevel[0.55], AbsoluteThickness[1.5], Opacity[1.],  
LineBox[{{9.09090909090909\*^-8, 9.090909090865543\*^-8},  
{0.0874367476365131, 0.07774905743802465}, {0.18222810297558026`,  
0.10409673959866513`}, {0.27073779576926765`, 0.05716133039337165},  
{0.3575112797365835, -0.026084496726167965`}, {0.4516394623155443, -  
0.09591154799603378}, {0.5394859823491253, -0.09685594593277226},  
{0.6346872009943513, -0.02730376120671303}, {0.7281522108132057, 0.061646715198529656`},  
{0.8153355580866803, 0.1046634148537508},  
{0.9098736039718, 0.07509702498429204}, {0.9999999090909091, -  
0.006536873471333553}}}],

{GrayLevel[0.55], AbsoluteThickness[1.5], Opacity[1.],  
LineBox[{{9.09090909090909\*^-8, 9.0909090908608\*^-8},  
{0.0874367476365131, 0.07671378556951527}, {0.18222810297558026`,  
0.09685439581479163}, {0.27073779576926765`, 0.042069810325321415`},  
{0.3575112797365835, -0.042006785469922474`}, {0.4516394623155443, -  
0.09808544986431629}, {0.5394859823491253, -0.07760167026270944},  
{0.6346872009943513, 0.0063643674428021085`}, {0.7281522108132057,  
0.08405712128907425}, {0.8153355580866803, 0.09555213349985489},  
{0.9098736039718, 0.03202960165577907}, {0.9999999090909091, -  
0.054402034659985464`}}]}],

AspectRatio->1,

Axes->{False, False},

AxesLabel->{None, None},

AxesOrigin->{0, 0},

Background->GrayLevel[0.93],

BaseStyle->{FontFamily -> "Arial"},

DisplayFunction->Identity,

Frame->{{True, True}, {True, True}},

FrameLabel->{{None, None}, {None, None}},

FrameStyle->Directive[Thickness[Tiny], GrayLevel[0.7]],

FrameTicks->{{None, None}, {None, None}},

GridLines->{None, None},

GridLinesStyle->Directive[GrayLevel[0.5, 0.4]],

ImageSize->{Automatic, 28.4375},

LabelStyle->{FontFamily -> "Arial"},

Method->{"ScalingFunctions" -> None},

PlotRange->{All, All},

PlotRangeClipping->True,

PlotRangePadding->{Automatic, Automatic},

Ticks->{Automatic, Automatic}] \) Expression: {Bl,Li,G}

Parameters: {k1,k2,k3,k4,k5,k6}

]

```
Manipulate[Show[ListPlot[vn[[1]],PlotRange->Full,PlotLegends-  
>{"blood","liver","gi"}],Plot[Through[model[k1,k2,k3,k4,k5,k6][t]],{t,0,1500},PlotRa  
nge->Full,PlotLegends-  
>{"Blood","Liver","Gi"}]],{k1,0.001`0.2`},{k2,0.0001`0.1`},{k3,1.`*^-  
6,0.01`},{k4,0.001`0.2`},{k5,0.0001`0.01`},{k6,0.0001,0.01}]
```

```
Manipulate[Show[ListPlot[vn[[1]], PlotRange -> Full,
```

```
PlotLegends -> {"blood", "liver", "gi"}],
```

```
Plot[Through[model[k1, k2, k3, k4, k5, k6][t]], {t, 0, 1500},
```

```
PlotRange -> Full, PlotLegends -> {"Blood", "Liver", "Gi"}]],
```

```
{k1, 0.001, 0.2}, {k2, 0.0001, 0.1}, {k3, 1.*^-6, 0.01}, {k4, 0.001, 0.2},
```

```
{k5, 0.0001, 0.01}, {k6, 0.0001, 0.01}]
```

```
Clear[newmodel]
```

```
newmodel[k1_,k2_,k3_,k4_,k5_,k6_][i_,t_]:=Through[model[k1,k2,k3,k4,k5,k6][t],List  
][[i]]/;And@@NumericQ/@{k1,k2,k3,k4,k5,k6,i,t};
```

```
fit2=NonlinearModelFit[vn[[2]],{newmodel[k1,k2,k3,k4,k5,k6][i,t],{k1>=0},{k2>0},{  
k3>=0},{k4>=0},{k5>=0},{k6>=0}},{k1,0.008`},{k2,0.0001`},{k3,0.0014`},{k4,0.001`  
},{k5,0.008`},{k6,0.0001`},{i,t}]
```

NonlinearModelFit::eit: The algorithm does not converge to the tolerance of 4.806217383937354\*<sup>-6</sup> in 500 iterations. The best estimated solution, with

feasibility residual, KKT residual, or complementary residual of  $\{1.62514 \cdot 10^{-12}, 0.000364947, 2.88464 \cdot 10^{-13}\}$ , is returned. >>

```
FittedModel[newmodel[0.0504604, 5.86338*10^-13, <<22>>, <<21>>, 0.0723137, 0.000159392][i,t]]
```

```
{fit2["AdjustedRSquared"], fit2["AIC"]}
```

FittedModel::constr: The property values {AIC} assume an unconstrained model. The results for these properties may not be valid, particularly if the fitted parameters are near a constraint boundary. >>

```
{0.961324, 802.995}
```

```
fit2["ParameterTable"]
```

FittedModel::constr: The property values {ParameterTable} assume an unconstrained model. The results for these properties may not be valid, particularly if the fitted parameters are near a constraint boundary. >>

|    | Estimate                 | Standard Error | t-Statistic             | P-Value                 |
|----|--------------------------|----------------|-------------------------|-------------------------|
| k1 | 0.0504604                | 0.00722833     | 6.98092                 | $1.75143 \cdot 10^{-9}$ |
| k2 | $5.86338 \cdot 10^{-13}$ | 0.000444204    | $1.31997 \cdot 10^{-9}$ | 1                       |
| k3 | 0.0010562                | 0.000172787    | 6.11273                 | $5.90725 \cdot 10^{-8}$ |
| k4 | 0.00500669               | 0.00141602     | 3.53576                 | 0.000749026             |
| k5 | 0.0723137                | 0.0104819      | 6.89895                 | $2.44907 \cdot 10^{-9}$ |
| k6 | 0.000159392              | 0.000187044    | 0.852166                | 0.397204                |

```
Show[ListPlot[vn[[1]], PlotRange->Full, PlotLegends->{"blood", "liver", "gi"}], Plot[{fit2[1,t], fit2[2,t], fit2[3,t]}, {t, 0, 1501}, PlotRange->Full]
```

```
]
```

```
\!\(\*
```

```
GraphicsBox[{{}, {}],
```

{RGBColor[0.368417, 0.506779, 0.709798], PointSize[0.016666666666666666`], AbsoluteThickness[1.6], PointBox[CompressedData["

1:e]xTTMoPSmViYGCQAGIQDQEqDI9v5axhyUpzgPDtHIpmPpmYyVgM5Xs6MLtL  
rwpbHArhNwQ6WNk/qz9p6QblhznImvKq7xF0hPKjHcxq+2PFIq0gflcEh88z  
DyuU6ZhB+AeSHLIMd205YWYKIU91MCtzP3c7xwgn+4w5ZqifpAUlO+Q5cA8  
Uefv9RgDqHyOw54XXFZeBVC+Q75D4nX5bzXr9CH8BwUOp99PP7zmoy6Er1Dk  
0But/+sEM5S/oMRBufcAXxCbFoSfUOFw5177s3X26lD1NQ6u7kU/+a+qQs2r  
d5h5eqa+urMKhH+h0eHt3lmGNpOUIfyCdoeQHzyvFqgrQfgZExyWrmEXITJS  
gPAlpjw+z+0dvaQcDCXOhC94PhMh3PyxzYY2Ug6AABmymtO

"]}],

{RGBColor[0.880722, 0.611041, 0.142051], PointSize[0.016666666666666666`], AbsoluteThickness[1.6], PointBox[CompressedData["

1:e]xTTMoPSmViYGCQAGIQDQEqDvsrv0oFSDs7QPh2Dtf+cmSwB6ZA+Z4OZxal  
/XOXz4fwGwIdDMNXS5skFEH5YQ72c23KfM4uhvKjHTTutK3JzC6B8B0SHH4s  
erTEdA2UfyDJYdJCySqpvTD5VlFv00qmOPfD5NMd4lSPMO6MhslnOWgcsGK  
FYTJ5zhoe0veVTsltc8h38EswsJz8mIo/0GBQ2nKbK7jQVC+QpFDwKtG15An  
UPcuKHHYyOzkJu0D5SdUO]xds7QhxLkQqr7GIVchNudWTAHUvHqHI7l1vEHP  
8yD8C400OldmPZvrnwvhF7Q7+Lb7nf89NxPCz5jgUJmStHLJDWj4SUx1kNtZ  
XxY4NcHBXOpA9ILjMx3urC2L+1IZ4wAAEi5yCA==

"]}],

{RGBColor[0.560181, 0.691569, 0.194885], PointSize[0.016666666666666666`], AbsoluteThickness[1.6], PointBox[CompressedData["

1:e]xTTMoPSmViYGCQAGIQDQEqDiprnURiH7s6QPh2DjnzbqY0hyRC+Z4OK2f+  
X6j1PwnCbwh0UNvKtvTe+2QoP8yhcgcn3b3bdVCg/2kHiuUjnuk9pEL5DgoPN

q59Pil5kQvgHkhzWvlv0c611LlQ+1eFMoNnsu3UFUPl0h7cJma3ntlug8lkO  
S882zepeW AYVz3HgOv3yj+rLEqh8voNIZLaG6JZSCP9BgcPmdC35uyfLIHyF  
IgdZXYllCu4VEP6CEgeuWdbzn9VUQfgJFQ4HOa2rYzfVQtXXOKTrfG3/6N0A  
Na/eobBJlXfLrUYI/0Kjg+SM038srZoh/IJ2h1MPJ/uxSLRB+BkTHC5bfjU/  
Lt0J4UtMdfg4Q01wmX6Xg7nUgegFx2c6VBTqWEZ4dzkAAGLFds8=

"[]}, {}, {}, {}, {}

{RGBColor[0.368417, 0.506779, 0.709798], AbsoluteThickness[1.6], Opacity[1.],  
LineBox[CompressedData["

1:eJwVIXc0FY4bximzRFGkllmFriJ79L5G2ZtrhKSoLhGyItk7GXEzEhoUaSjz  
uhLF18jlyLhGISMjKiL6+f31nM95znn85z3j+eQo7up0xY60jp2ejq6/6vK  
Uu8PDw46aBzcKnI7NxmHb4+ /+O5Dg8cs9/dyJyXhzUY+ryKfWSBImjBIjiZi  
25iiebZPOjzM8n3E73UL4141vOAibUFjwTPoXh+Hzz095Uf3MiHT7EiTjWQs  
Li82aAb67MDWkqVG39NReMu6Yvxh8k68ac03hXsxAu9XsD/ZTuJERIGbWZGX  
4VjnX3Gsby83tig7iqk4hWJ3H/sSLPCg/6c2eUWrEPymeKH0cQMv5shuFbhj  
E4zbV9IVr/nwYd73l+zDXDfmgM0FugGDg/joYd1IPikAeWiDoznJAsg45tle  
1eePYqrSj5hJgii+ERujt+aD0rODTFUWQrifqWafSqE3Kt+LuuSmJozvYu8n  
07hdQ4P1QYnuvaIYuMcuE7ME4nPom5FMxzGbNXGfHMBDzxrJz2vvHAYi6fP  
k6ZErqJHddSrvAYx9Cf/SCCWuuL1K9K7iSXi2OagR4nmdMEwPpo3630JNKnQ  
r34VeRlTb0grXvUh4EyYedPdl86YTaBlCDIK4gJ9weNWJyd8Tlv622NwDLXf  
NymvHr2Ag9lzw9nJxxEbS9q/zZ/Dkd91iX4sUmh9xjL4xZQDjhumq5kGSSFJ  
vOLO2NhZnNvQeMBIkkYV3+Vvu8/Y4iKR13x4WBojCDysmRQbXC6eY6iwOIHN  
F+Q10mStke5surOrmgx2l16MnLtMRIYyN57TZTL4uOnLIK2gBbJyaDYeJMgi  
N30ef+isGXLWzll92iuH0aVmz6vKTJCbP76/KEEO/RXlJf2vjXG/e3pcJIM8  
XjxGOx4VYoTCBzVnFRfksZG7VQ636uMRX95sLmcF3C2yIc9G0kVC25zh7IAC

kn+o71WZ1Ea5m+kvchoUMfLSRLGfyGlu6nU7d11VCW0o4tbcXzQRjmlympco  
4bjTjLzESw3UHp7zYr6vjHeY0uLuhahqhvny980huFdS5+DmAJQzR5HZ6d2Ws  
CtKsSTECwoA2oCnv5qOKnSJHwjVeKqNklHi21G9VFH4scd3pryJuadvJ+Mv7  
JB546kQlc1TAHu5ll/Jfj1FjxqBrZVQOC+1pnQHegPxVhxwk/WUx+HGdlvwC  
3KKySvdKVAAbFl82NQ5QQF4MPTk4JY0bJ5XLNCsReUyl6h7IH8dJx2KS6Cpi  
+DZX8ffqx7Az8hA/i5IaMlV6k6xYTCUh5eqdjyl8NF25E/vwbLYH5H5kjmivU  
kGHIZ6anVwyTF68rPPujhqKquY3eakcwkHtuJkFRHRX/sLh11YuisX2XqWmF  
OiYza2ydZBdGpVAtJpk/6rjQ77drV5fgZs/Kij2KGjgeuD7zrOgQsjcRriz7  
aaDF0tfZBLIA/pnNEegr18DwEDOmQ4cP4tiu3V2VKxp47NoLSW3gw4+yUVFZ  
CpotVNuI9N7P+bduDJ3tlwT/75h1HCU3YvxuS05aiuamJLmfNiriht93ptZ  
CCmcwpuhL899tdqDDIMfWBj9TmFWmTCnGttu1NuhRjko04Wi1TVUyS50IJN6  
5t64fArzM2KoLs93oYCFgNBT+dPIFjYpU5u1E39mMcVeKTuNtlN9vCWm03Do  
rb+q0fjpdBVT0yF0azs2jn1fOC6vhd9fmco8/MqKr1gcHnL6amFf7qtMb3MW  
vHf0k+XPUi30NrhXv05jwmjj09t7fmvhlx27K4uDGnHzWgW1TE4bi5qZDwrl  
MuBpyn2RgFjtdBVSyp+n0ePxEc4+29/aGEw/yTncSof7GCLjT8rpYLzN92qd  
e/+A4cgfEPDRwcjlbxE+1HWY13Ndoi/VQa+KPgut9TXodx9+/PWXzuafSGJz  
lqtQn2Jq815WF9V69uk/b1mBuwMKtdFvdJF9xMxKbOMXhP4rvEb6pYsFla4H  
fpT9BFehg0f0ZfUwl4Wm/TtiCYhayQMEbz3sHuA0X3JeBDUXxtscb/SwtfzN  
XI31Dzh620/9x089bAp4soF2C8BdMvOrU0YfBclPmvpH5mB6tcM27bU+0t6S  
vFbCZqCL/9ROv5/6yFy384/8+hRQ1cvrrGUMUDI9zluaMAkFzhK+ytcMsEb8  
0zMO+W+QHJstzvfA0030hu9+zkOgcW7hjaWDPBkkfHVkA9j4NwZnjRywhD7  
ToYocxd+BeV9LisPSgxxFzHw3b6CUaj/4r2gM2+IAj3SjN6tl6BfGDw5L26E  
XWrb4gn/hqHbK24k1dklxesKMwIDhsBeJe2zcp4RSvnYKPmy0+AbQ277KM0I

a+HpQkPpAJRPWlzVsRnjZLtxhLJXP6g9dxi8rG2M8W0slDGhzxDJ5fxZxdkY  
J87++LK+pxeafF26OMKNsedN4cw8Tw+wD15t/5JrjJ0aJP6OI91gij4tb2qM  
0YQa49uo1QVpDwMao2nG+IF2ZPyf1ycYYAmpP7NmjCNOzNylRZ1woSOOQi9v  
go9KLpp8wA4okE0q7zI3wROBKz9bMtpNj3tdb6nCdKryenYrLeB9Ebmi+uJ  
JpjBFe+Y1/sRfBxziwyKTZAiohRyqa4VKj88LhBoMUE9z7bFJzUtsCFe9HBp  
ygRP+whulTU3Q9RSaVa6iCk2bS1XXdrRBC2WlLuuGqY43ap7kEvjP9hJqb0D  
50wxdOEeyTW8EcwFGhI5b5oiK4uYvGFHA9wNb4kfzzLFMVJ/MitYAwxOdkSX  
V5piyOzCy9XYD3DioDc87rMp5o5PCyX/fg9P93wJlNphtnZ+wpaek/Uw5//N  
j0HaDP/jZ8stv1IPJ4a+X+s1MsOqkInRtNU68FNfvPr0ihmeWWQOSk+oA8rj  
ZdcbcWbIdrmcZCNWB3Tb1y8ZPzFDMXeGOu+md6DpvsVJqMEM14lr+2I93kGr  
/A67/7aYY0ONfjROey1wZnFaZwmYY+8sq69xVC0Q6fZauJ80x0cyXzN3aNRC  
xgU+E3Vbc3TnMSxQ2VoLQ42CBnum+MHI7eP0hvegiDhiM4k2RwFvzUUTdx+  
CxeTCKeq3pjjQje/3cyZt7BgraB67oc5VIHX1wL+1oAMVVVRhsMC9edXSowK  
asBfUEOWmWCBiWQG7Q3rGqBGakv161qgp95REmFXDWyZMSA8u7TjdLJ3brVS  
4bSRmVhwpAUa1bh7f0qgQmyJlYjZQwvM/C1D/9qcClyB5/n+DFtgToG7leJs  
NViNXOjtWbdA/+mMaMeeasjSdNtzfz8Rc6yUpSRSq2GkwGuXpyIRIwJNc866  
VYPwDv8dpyyJ6J0hfhqZVtxoueQSx7vUmYptc0F118Wp41h3GOJNMxLFGgBS2  
alhUjKGnviDikue/36k/KCCXnbCe+JGI7pkclYf6KFCYtyjzcYaILR8kf/vV  
UUAgN+i6ndUSLx5vNFI7ToG0wsoH2qKWyBxt9jI6mwLbX/APRGhYoq6qofCW  
2xQIfh3KWedgiZf0/03TD6HA7/IJHbogS8xMKZoz8KaAS7VuiGrmpp/BL/ud  
RIGR2uLy6+WW2Bl35TuHIwUsPnAulHVb4rkLrx89sKFAU5PP4V+Lloi03+iT  
zSmAbf320jut8M6zZ2kfjCjw5tPJNHeCFe6NrLxxTJ8C4p/zWot0rfCcS4J8  
lQ4FcgaZGKcvWqFnuoiPITYF9oySVA5HWGF2IU7nshYFYsc/el3Is8KBsNjf



sZv+vynpwtwaK0w5dThhqy4Frs2lfrkatELp0Mv7zDfzpxdXeQ+sWmGewoH2  
q5v3zy7bm1jzWCNR6Od+QzMKdK29i06TscY79Foel5YU0KU7/PaTiTWGZZeo  
89lRoIYhbnmnuzXaVedorm32lWGdlzSMt8YCEwHwuEyBJzvMnOOeWKPD7H0G  
n6sU4Ocsu9f4wRqPW1eY0PtRgHX/TTYNeht8Y5PALhBNgaCDXzWC+W1w+OFI  
f3ASBX4KaQVUK9tgJ7N1BS2DAkNH0ablFwzQ7kxIrWYAmZSXoe8U2zQVjxX  
Ra6CAo2yvVavXtgr4N5PX09BUp03m840mODEjZZ10B+CkQbH3t0yOEMcvQa  
NTzcVg3S14wctuvaYe9jnXQtWqIrLrdM8Rnj0Zfdi462FNhfs03IE3VHiPz  
v9T3uVHBSsVBwND0HjeW1ezP3qSCePVxUnWWPRp4H107lUOFNmrHeub+s5v7  
+L7A9isV2EZjkovYHPDT/NZQOVINEMeaKy5v04fuyrsJP1TewvS0EcsY43nc  
6hLtdVmvFlbVOucOVDij/VhoTjd8HcTyDEY8qCLhhECPWbbie5Bdqoj2KHTD  
661PN27yN4ATW8x0rYQH1o/OJP7oaISrQyuTHmJeWCxROHH2bh04d4uwaTJ6  
o1KQuETo8RYIbFMZr+j1wcfmf10ZX7XCf9HktJ4OPyTifRGK1WyDbRefu+55  
eh33HSFpThDbIY5h+/61J4HY3j9OEOpqqH2PjG+G5wRh5m7p49n1HWD4Rozh  
rllwfnKO4n9/vhOeL7f11CqEoHuzf1wJ6yelbfnouyYSio/ujUuEZX8CxpBF  
UdbDYXhgB0n0nGIXMMtvf3lJKBzTDLdOSDV3QdjNUIM+9gis9vixst+gG+7n  
7yfysUcig+uDkf7ubpB15PLw/BuJLCo8L0qMesCUn+4i70QUcP8r6w151wMc  
lez/pXyNxgzna45MSr1wejJA9WB7DFpeGJH/97AX+H5v4w9qj0Xeb1P3BHd/  
hgDG232SLXHIEbbikxD4GczyPfiXSuOxb68ITvV9huYjPqMRb25h5uq34TGl  
PqCq9BGOPkjAF4XuA4lJfSBvKmUhhH8bxXlZ2Vm/9kHBA4ufvpqJmLdIGMmX  
7wfPb2pazpWJmO88n0II6we2/WB8UikJ93RMGl/t6IevZJcv2S+TsIyPd0WV  
ZwCCUjkdC0STMXxo1qDUagCmQpvImY+S0eh7a3RE1gAkVbwk8hxIwZx8csPE  
5wFgHXnSHJiVguA4fuM0zyBoRh2QjNt3B3UemI5GmgwCxZfKK5h4B5tTasd1  
IwaBwcqjKo8jFXmPSTworRyEmBCzicLIVCQ0Jzodmh6ETokXG3Zrzejl7XTq

AjcNZt7ztf7xT8Pp/nCmLZo0UHtSKcy/kIYj02dKLrjSoPw+cxFhMQ0nOlNt  
d1+hwfE08xOqP9Pw1LwRrW6T+cPm1GxX0nBNzM5J0J0Gq7aCZzPoyNh80TKR  
5kGDVztj07l3kXFWlGS170sDYT9rdg5pMnbKHe7bHkqDTLfHqfwyZGS9pRBU  
usmcTksHJOXIyAi31hzCaEBnekvCQImMivt5b74JpwFNolY7Tp2Me3ydnptpG  
0SBt+EgYsxxZ49tFyQ/iabCjx3sbjwUZZ0p16vRu0SC85V2SqCUZ38fvalza  
ZM8K25xTZ8jY61JwRuM2DQxTEqvDzpNxpeje4UgSDd7H0DRTnMhYpJR8LyqZ  
BirB4i15F8lYRbG7JlCA/Er9f21LmSsZ70VHXCHBrndzl2XCGjQuE67VAq  
Dfba2E+NuJNxnMtl1rjJicaFVxc8yCjq+JzLLY0GzFory/+8yJh0/rvERabB  
/wB4YeBV

"}],

{RGBColor[0.880722, 0.611041, 0.142051], AbsoluteThickness[1.6], Opacity[1.],  
LineBox[CompressedData["

1:eJwVlHk0lQsxbdU1lZApQ0jXFCJThoPOlknKhuglkmSeOcmrIURmkumcdAvp  
pqJcZUxurqTUVam4boalQhkahMbvfh8861m/f/baz157PRt9Ip39V/Lw8FRz  
5//b/FP/B7ooDzVJOywmnuZGHcmbqH0fPUTVaXmzINBsiMT7Cswr0TPUnZut  
Q1cr0fB43HRvTvQPqu7SWGdWL2dkX++qlQhZCROz5QY7KTfUMBjGozL8aHEp  
a62a9cDixy5afLQwxv5z05v97o1c9+aJPwvWwiVHLoGnxAdlzSKXhULE0fnn  
wipjBT/UyfqFMSwlMca8svw+yx8dR5q3DMisQ9sf1tDXwfgxYDIJ+q8NKay  
4uJm1IPw1tSvobJLFr9prEwocA+G0FcRC1a0AhLd5RcyMkIh7+HH89J+A6xF  
xRsep4dBemhwtLxAcD4LA6tNYsKhIjtutTdhlyTreiXzPCKgYaF/QSDkd5T/  
lNtUuSUS+jOD/LclZbhLdr+jLkXC7Gx6UISlCjZPdglekTB/seg1gsZNSSw  
Ztm8AnS4Xk3PzeBVh7CZ18Z6go6DB/TnzObVsfzg3qXbZXQECQ85zb3chBS3  
fBnfCTrot90vV3Rp4J89Kxom1BiIDdeXdL2hicYrdTrH/BhIURgiV5Vp4fNT

157IUgaKj+qbRkVrY14p9Iu0IBOl2kOnlX10wJ95pNPQhInKofTvvfZb4CFF  
lwn2Z+JfG9ktnfK6UOvd5fUqj4nB0tmR0gJdGFfi/7dyMSrLx0nYwT1MCqS  
L2o4xMSEQ4mlc4IeqoW06R48LMz+tDrPF6KP8e2HyB1g4aOr7N6REX2c4q9Y  
sDvAwuK1Wd5mWgDHwi2aEmNY+M5/t77goQEYhjatP/JZ4DIYEhBmaYib4ZdS  
hi+zwNsYIW3TaAivAlhT7rCwSpR2f4P2Vjwhi7LVXrAg/tesxjMZlyhTuoZ5  
v7GwTvrvuf1dOGMHwVK2mwhoS6yNLstN4jXHBWiVGQp6EUleEuXesMUSrs72W  
NEmobKDNmM4bw87iq/1LExKbDsuWSgSYyJhv0fWhNQntx7MOMy9NEPbiyvq+  
PSSMEktqy7tMcTyr9VNkIAIkf8ShWAsKwt9dereOToK6hSa+9wYF9hlf4Kx  
JGjpsH3aGmYIEuu3dUomYTsyyxQoM4NXpebVL5kkdhvfVRmVNEeTzhiLL5/E  
nrySFy1Z5tDTHIRO5ZBwfRuRVsRjgfcDqlIJZ0l4UGnGEdeWqMwdnVqsIKGT  
rlmq98UC+2rfjHhflrHy8Vq+BXIb4sKy11hfjdG3bjG0aWEbPMv2l12tI1Ht  
NdQbR1LREe24uqKeRFJlhyl1gYq4ngo/jWYSmot7nY5RgF9pvMm7WklIrr//  
m28swPb91Cj0F4mf28waaS1AlM+FOUY7iUmfayFqX4Fr++/0pnaQ6E3bqChI  
sURdh2vazk4SrVVFT6eOWKJXzVeo4x6Jiz0CqQ+bLWFr2jXzpYtEwcdYk6vL  
lqjqr8+Yuk8ift3suxOm28G/UWqm9AGJAMqhsqgj2yERwHgl103Cyeu5s3Pz  
dtQw9XkPcZmSvIPfcHk75vLLKlhVqlsaZYytUI1M312H5dFurXDF2OsoHg7  
pnctI5dnypUGmqwg0zEtVcbVHxeTfN6yZIXamJUEP5d7tqannzGhIXqBZ8mW  
66fj/SsliYYG1RTSOZjrt+Jo+OzBJhom+vcmBnPvyTn36pZlEg2++W2Zdtx7  
oztdCGUTa8jFNzqj3SVhJ0xpdfNoDZOSKnFHbl5Gclj7y9aw/behFU3N08l  
Qkm5ytgGva8Nqre0kfh8hj8rvNEGASO2ZFsLieE7RywcF21wWDDHfbqJxP3x  
9/06xjuQ+Xw6kq+RxNnNz9w+N+zAI5+aQOEbJGxay1TjGmzBI0L1SKgiceql  
SXtG/S4INnxPyeD2KflXNStkYRey9aWfCxaTCFPesGn3VjtoKO7al1JAwjKU  
L0+03g7KtdtTgnJJTH996sm+uRtG/f0137n9NZMLXtp/wwFGG0fz0sNJ3B0j

53f00eDc9Q3x3004fa50mpzTdETuifGeyCASXubsf80qHGGvMCXt7MvVr/Ee  
DLZ1gulJ1RWC7iT8nma3rjDeA0JXfy0djUSV1Fi8nqQLzj+UEsmR4+ZVeuLH  
yR5XBPC90OPYxULarby+YQUv3Iie0SxUZ2F62lFwnM8XzOtSEijJThy17J2V  
bw6A0PTu7m+TDGRJD6aevxUCP4+zTY93MbD1U3MGvToCv5xKH3+4SYf/mszp  
di06nuS1+z7TpiNqeGmSrsFEpm7IT7PyKES+UF1D4yPBoOSxU5WiEP/YfKK5  
PxrsPP+jbQ6ReJDBYfc9jQFvXv+Hs04RWB1YEyZVFQtZjt8NZmg4snmF1n+7  
HI9Mwc1xYXFhkLvglHi8PAFDtDGFZU4oHOo1eE9RkrDCqT5pqjsENYuPDNtN  
jsFH/HT1h0/ByHrUc/ibajJGz45YC+sHg+/YR7VV6imoju3WWBsYBAFjobog  
5ePQ6OFINIYGliUx2X5AJBU/T/193mo5AGUX17sqiKTh5tG8iuNWAdjql0Fn  
fE/D8ZfjXifK/OGsyBMo+yYdFsF/TvLw+kO0ReRB4esMtFakEMPefrCZjLPY  
8CQTuYLqws3/+ELhy2rFhCdZiLnT8LnUwBdxHkDOo+ycTRUSKDgnA9cLtlv  
zjfkoch+wmFYwQcPN0WPptbnQujls/WPCw+hzXxAe/P5E6jdljpiKX0Ixs56  
hEpOHpSrUs5InPPGpfPE5800k+CRDK2VVPUG463ljoCWk5igHpiLDTmIneup  
Ttso+ThjV9ggl+SF15zQsdK6fJtt+yhy5soBJBSL+1xSK8A0oq175rUnppK7  
OX9cKEBC48iWw2KeyG+uc5WWL0Sto68E22U/Vr26/DD+TCGE05ddG3I8uP9a  
XidbrghzfZuT9Z+4o/Vwm+zvJ4sQO3aKqq7mDt599FsVosX45hPyY5y5D5nH  
XN5UpxXjN/r7NQLP3NcrVfvzwLdiGARtE9tPcc07ToV/lo+w8XrX+3Map11h  
eblFRXGeDZWjNK3yVa5oKh04ov2RjYsKRQdVBVhyhy95rYPGZjZ+ne+aqeF2h  
mDJr6bnEhun+HuXGXwS+ev5+8DQPB+5mSf8+WyBwfW1WyToxDr50vg1SHCOg  
EuMulqrPQZjPqa7FFgJ/RFQWKxpycCIY/2BGEwFx/0/yOkYc4J7gHtkGAjzO  
uVr2FA6KrxlamdcRGNJqt83ezsHO1LXeaRcJsEc2pQi4cMBhi0dpFREQ7iNX  
SxMc5B9WvtCeT+D4o7/z1dw40AopMdiXR4DR7FluvZ8DpxsJnmlZBBwKT95O  
8eWgT7Fh8E0Sgc7MIVqhPwe2fdEvExMImCdpPqoI5CDuh66BbDwBzfc7/7WH

cmDavX9m92EC53zFfj6Gc2CfXuf4lkVAXsNr6lUkBwavu1cnMwicdKqOmqdz

UBN8WlEhioDAjqXFX0wOJh+KZzeFE/gf9z/NUA==

"}},

{RGBColor[0.560181, 0.691569, 0.194885], AbsoluteThickness[1.6], Opacity[1.],  
LineBox[CompressedData["

1:eJwVzkn81IkDxvFJgxwhCeWOHIkyK3I1D02yW6SJKbd1lnIMuS3jHL6TXJlv

J6KcbY6yNTk2i5fdVttuB6scqySEpEOh6ef3x/N6Xu//Plp+4cxAEQqFEr6y

/7/1+/53bFkKnTI7WmU/ZUUFyXvVMB0zRB+rszTpnlFGyu9qUddjZuj8vd65

5fb6eDhm4XI65ivd1ee1Y5yUOXhNPQ3rQ0Tw0ZOdFa9gjfrISPNRZTEo0MiQ

e6HAwnwPIylmLW68iBVaDzCQ6yZ4dbVQDjluYq3VY/YoFcjUSIXIY9racZTS

54DOeMH2AWVF6JS3cpwjDuDpgMx7+pwS0lavkxBRdcJri4BfKns2YvKzyeCG

mwchtShjcyGDcna9htEXA5B1T2A8txRA0/uJmI1lQmlocHRskJNnBN9yRmq

Y8LAhnZNPgQzLLjqcfnjh0GbGRRrcdXG3kPx08VjXWB1mXsszFYHfBHiSI2I

Kxy/Dho+VdbFxMC3Kok1LLB+5uZmU/UgKdrsdqNBR8v2lurOT1cqE6S7I5g

gd3GbSrvMcAu/VuWeHIExT/RLCjijDB6ZY9vq4cbSoyGLmj7GcPNsT609JYb

Koe4y32O23HhQtews6Q7BktmR0oKd8Bppt/k3+vumBXuqRANoWGLcM3y5CMP

zLM2uoyM0BDcv8XsgaInFm7MUgWu3yFX4op6w1FPUHzOB520NUWjz4LqRJ8n

5H+dNXisbIY86ZvUiV+9oKjU9ez6GTNQfd9al37ygkr4eV4W1RzPMvY8U9jm

DR0NxoZFnDnkR8mItCJvMKWcbyjrscD9VQXHdVg+cKczzMNibBAg2VEz4u4L

Y+7WEpNPNhAeLyyksX0h8lBO9GP0bkynB7Etub6o8x56lBhNh00HLYOhyRfC

3Va3GXcB4+msp/piP8LZ+wmTKbCDcrsOd+7qj/hwSYwIvW0P9d6jL4UP/GC1

6cTniptOcLxTuX2XMABmJWe+5v/FQuXTvgTe5DFkteT1Dat549zik3Hq5ZOY

mjq4ZkzUH4E7qFqnbCKwaPtoVIUQhE66gozJlhuE0mBmRUsIFP0Z04r3o7Dz

vSCbXReGgjOqLcMp0QiUzpnqMGSjKWgmjCIRi4jhzxNsgyj46R3utKuIQ/jT

LdIM0WiEOCqebV6fgKSH1q8E/TEwfeyp2RKeiD+ySX7fP3Gw5XisW/88CZLB  
9Sc31CagS1X/zVatZPCoUipLNUYf8z2o2h0CjZdc07JKEtGmdOU4g13Dpya  
DajnLDmgd/LHDk1xUL/Qa9qxKxWLF4/qynNSQfT+Fbu0JQ3Fyd6mXmJpEE2d  
15XQS8fNF0on1ArTIG4u1XhMOwP7m2pKGzakIz0lzXFAJhNvTHi1Z3npKK1S  
YanJZCGTXWX2vVgGdvqtZ0cuZ6GR2c8x05UBpjoleOM4F5HMxd96nmdA9q7M  
H0UvsvEloehP7suE/USijcbfOTCvd1BQqM6E2idJ9eS/CfybYNrLJ2FRNG8  
AeNeHn7qvJ2XFJKFw1XsqrlfTmNSs/pcXXsW/tSPGc1szsWXbWM0dUUu2q0H  
jLZVnMEDk+BeuwAuzJkmrjqn82A96z9262cuqitcP8Qy8jE/aKq//GWL67Xt  
vqC7+XC9t2q1z05sSKvQnXdbFiB7T8DV4oxsvCRPvChpXHGbtIJSZzaSi+X9  
qnULYdRFk40XZmMy7T558Voh2pemM/OsclAgaGQpqRZBp1+WN8/OgcR/NX8m  
XSpCWatwq0ZtDhhcVWPepR04MTqiVjScg9bY9o2b88/CLL/2ndFaAtSj7JZy  
2WJ01Z4UYdgQyEk9PF6XVYzUUYmouWACjwwbhF5LxTjgr9fbmUfgTbfagy/x  
fGzT71rovUPAtuaujvocH5vUrrpoDBG4Uyp+3WiejxSXpf1tK97Bd/n05gMf  
F9Gi7jFMQD191tbzMx8ydjwWf4TAoudmnwsUEpfNxeSkXhBokiPOK64joeRh  
WT8zTkAnzk1GlkbC/p1xNzlH4GJYZbG6KQkVzR9MTd4RkA98r2psRiLGMznl  
/oopzFxDROsSI2scapfnCQwZdjw7EgYJC8e8vllgD+iny5+mIS3w41ZtUUC  
a/uiJZVcSbRceqvVvOKM3t8KdI+QWGNybnJgiUCkwLNsrweJXAp7PH6ZgFNR  
flu6P4kvgwcrHwsJdOcmMYoCSeQ5Nbcd/0bAmrO1tzyYxPdydxq/rXhraNez  
jhMk9ubVbTdcxcMV/3V+/4SSUGBWCE6tWNnde/K/cBJaESxNlGGP+c51EXNs  
EqYn2/3frFh83+eFb1ErfYKxdM5qHv4HwEljmw==

"}}}}},

AspectRatio->0.6180339887498948,

Axes->{True, True},

AxesLabel->{None, None},  
AxesOrigin->{0, 0},  
DisplayFunction->Identity,  
Frame->{{False, False}, {False, False}},  
FrameLabel->{{None, None}, {None, None}},  
FrameTicks->{{Automatic, Automatic}, {Automatic, Automatic}},  
GridLines->{None, None},  
GridLinesStyle->Directive[GrayLevel[0.5, 0.4]],  
Method->{},  
PlotRange->{{0, 1649.9066}, {0, 841.4180778}},  
PlotRangeClipping->True,  
PlotRangePadding->{{Scaled[0.02], Scaled[0.02]}, {Scaled[0.02], Scaled[0.05]}},  
Ticks->{Automatic, Automatic}\) \!\(\^\*  
GraphicsBox[{{},  
{RGBColor[0.368417, 0.506779, 0.709798], PointSize[0.6], AbsoluteThickness[1.6],  
EdgeForm[{GrayLevel[0], Opacity[0.3]}]},  
{RGBColor[0.368417, 0.506779, 0.709798], PointSize[0.6], AbsoluteThickness[1.6],  
EdgeForm[{GrayLevel[0], Opacity[0.3]}], PointBox[NCache[{Scaled[{Rational[1, 2],  
Rational[1, 2]}]}, {Scaled[{0.5, 0.5}]}]}]}},  
AspectRatio->Full,  
BaselinePosition->(Scaled[0.1] -> Baseline),  
ImagePadding->Automatic,  
ImageSize->{10, 10},  
PlotRangePadding->None]\) blood

\\(\\*

GraphicsBox[{{,

{RGBColor[0.880722, 0.611041, 0.142051], PointSize[0.6], AbsoluteThickness[1.6],  
EdgeForm[{GrayLevel[0], Opacity[0.3]}],

{RGBColor[0.880722, 0.611041, 0.142051], PointSize[0.6], AbsoluteThickness[1.6],  
EdgeForm[{GrayLevel[0], Opacity[0.3]}], PointBox[NCache[{Scaled[{Rational[1, 2],  
Rational[1, 2]}]}, {Scaled[{0.5, 0.5}]}]}]}],

AspectRatio->Full,

BaselinePosition->(Scaled[0.1] -> Baseline),

ImagePadding->Automatic,

ImageSize->{10, 10},

PlotRangePadding->None]) liver

\\(\\*

GraphicsBox[{{,

{RGBColor[0.560181, 0.691569, 0.194885], PointSize[0.6], AbsoluteThickness[1.6],  
EdgeForm[{GrayLevel[0], Opacity[0.3]}],

{RGBColor[0.560181, 0.691569, 0.194885], PointSize[0.6], AbsoluteThickness[1.6],  
EdgeForm[{GrayLevel[0], Opacity[0.3]}], PointBox[NCache[{Scaled[{Rational[1, 2],  
Rational[1, 2]}]}, {Scaled[{0.5, 0.5}]}]}]}],

AspectRatio->Full,

BaselinePosition->(Scaled[0.1] -> Baseline),

ImagePadding->Automatic,

ImageSize->{10, 10},

PlotRangePadding->None]) gi
